# Supplementary material for: Ldha-Dependent Metabolic Programs in Sertoli Cells Regulate Spermiogenesis in Mouse Testis
Source: MDPI journal article supplement (doi:10.3390/biology11121791), 2022-12-09
Supplement: s1 [file s1]

| Primers for Genotyping |                          |                            |
|------------------------|--------------------------|----------------------------|
| LDHA- GenotypeF        | CTGAGCACACCCATGTGAGA     | WT: 458bp<br>Mutant: 600bp |
| LDHA- GenotypeR        | AGCAACACTCCAAGTCAGGA     |                            |
| MPC1- GenotypeF        | TGTTTCCTTAGACAAAGTGTCCAG | WT: 450bp<br>Mutant: 600   |
| MPC1- GenotypeR        | TCGGCTGTTTATTCAAGCTCC    |                            |
| FrenchAmh-creGenotype1 | CTATCGTGGATCAGCGACCTTC   | WT: 100bp<br>Mutant: 180bp |
| FrenchAmh-             | CACGGGAACGAAATGAACACC    |                            |
| FrenchAmh-creGenotype3 | GCGGTCTGGCAGTAAAACTATC   |                            |
| FrenchAmh-creGenotype4 | GTGAAACAGCATTGCTGTCACTT  |                            |

| Primers for Real-time quantitative |                       | Product length |
|------------------------------------|-----------------------|----------------|
| LDHA                               | AGGTCCCCAGAACAAGATT   | 134bp          |
|                                    | TCTCGCCCTTGAGTTTGTCT  |                |
| LDHB                               | AGGGAATGTACGGCATTGAG  | 105bp          |
|                                    | CCTCATCGTCCTTCAGCTTC  |                |
| LDHC                               | TTGGGACAAAGTGGTATC    | 294bp          |
|                                    | GTCTCAAAAAAAGGGGGA    |                |
| LDHD                               | TCCTGGTCGACCCAGATGAT  | 104bp          |
|                                    | TTCTCCAGTGCATGTCCCAC  |                |
| MPC1                               | GGTACAACCTCGAAACTGG   | 137bp          |
|                                    | TCAAGAGCTGGTCCTTGTACC |                |
| MPC2                               | CCAAAGAAATTGAGGCCGCT  | 166bp          |
|                                    | ACCCTGTAGCCATCAACACAG |                |
