# Supplementary material for: Ldha-Dependent Metabolic Programs in Sertoli Cells Regulate Spermiogenesis in Mouse Testis
Source: MDPI journal article supplement (doi:10.3390/biology11121791), 2022-12-09
Supplement: s1 [file s1]

| <b>Antibody</b>        | <b>Manufacturer</b> | <b>Catalog No.</b> |
|------------------------|---------------------|--------------------|
| SOX9                   | Millipore           | AB5535             |
| LDHA                   | Abcam               | Ab92903            |
| GATA4                  | Santa Cruz          | SC25310            |
| PNA                    | Invitrogen™         | L32458             |
| Mitochondria           | Molecular Probes    | C1048              |
| Donkey anti Rabbit 555 | Abcam               | Ab150074           |
| Donkey anti Mouse 488  | Proteintech         | SA00013-5          |
| Donkey anti Rabbit 488 | Proteintech         | SA00013-6          |

| <b>Chemical</b> | <b>Manufacturer</b> | <b>Catalog No.</b> |
|-----------------|---------------------|--------------------|
| IonomycinA23187 | Sigma               | 56092-81-0         |
| PMSG            | Sudgen              | 72122              |
| HCG             | Sudgen              | 72120              |
| HTF             | Biorigin            | BN80001            |
| KSOM medium     | ELITE-MEDIA         | M3025-03           |
| Choline         | Sigma               | C7519              |
