# Supplementary material for: Ldha-Dependent Metabolic Programs in Sertoli Cells Regulate Spermiogenesis in Mouse Testis
Source: Biology (Basel). 2022 Dec 9;11(12):1791. doi: 10.3390/biology11121791 (PMC9775226; doi:10.3390/biology11121791)
Supplement: Supplementary file 1 [file biology-11-01791-s001.zip]

Archive with 8 entries (8 files):
- Supplement excel S3 all metabolites in the Ldha-cKO and control sperm.xlsx
- Supplement excel S4 up-metabolites in the Ldha-cKO and control sperm.xlsx
- Supplement excel S5 down-metabolites in the Ldha-cKO and control sperm.xlsx
- Supplement excel S6 up-pathway in the Ldha-cKO and control sperm.xlsx
- Supplement excel S7 down-pathway in the Ldha-cKO and control sperm.xlsx
- supplement table S1 primer for geneotype and RT-PCR.pdf
- Supplement table S2 antibody and chemical.pdf
- Supplemental Figures.pdf
