# Supplementary material for: Ldha-Dependent Metabolic Programs in Sertoli Cells Regulate Spermiogenesis in Mouse Testis
Source: Biology (Basel). 2022 Dec 9;11(12):1791. doi: 10.3390/biology11121791 (PMC9775226; doi:10.3390/biology11121791)
Supplement: Supplementary file 1 [file biology-11-01791-s001.zip › Supplement excel S3 all metabolites in the Ldha-cKO and control sperm.xlsx]

## Sheet: ALL metabolite
name	adduct	description	VIP	Fold change	p-value	m/z	rt(s)	ctl-1	ctl-2	ctl-3	ctl-4	ctl-5	ctl-6	LDHA-cko-1	LDHA-cko-2	LDHA-cko-3	LDHA-cko-4	LDHA-cko-5	LDHA-cko-6	QC-1	QC-2	QC-3	KEGG.ID	HMDB	CellularLocations	SuperClass	Class	SubClass	DirectParent
M204T371	(M-H)-	Xanthurenic acid	0.0804016	0.898279	0.641932	204.033	371.313	1633.62	2421.22	1642.08	2090.82	1069.05	840.262	620.628	1529.31	2344.8	1669.79	1003.1	1543.02	647.896	696.157	686.28	C02470	HMDB0000881	Membrane	Organoheterocyclic compounds	Quinolines and derivatives	Quinoline carboxylic acids	Quinoline carboxylic acids
M151T412	(M-H)-	Xanthine	0.966075	0.651288	0.294028	151.026	411.549	69699.5	155273	51219.1	25164.5	40026.3	36194.6	40071.3	24594.8	48394.1	49367.5	39775.8	43707.7	19209.6	19371.5	20949.5	C00385	HMDB0000292	Cytoplasm;Peroxisome	Organoheterocyclic compounds	Imidazopyrimidines	Purines and purine derivatives	Xanthines
M153T434_1	(M+H)+	Xanthine	0.356612	0.737456	0.293892	153.04	433.963	37751.7	29535.1	17561.1	15348.6	13177.1	14523.3	17828.6	10402.6	20670.1	5499.38	14116.5	25801.2	9754.74	10109.5	10097.5	C00385	HMDB0000292	Cytoplasm;Peroxisome	Organoheterocyclic compounds	Imidazopyrimidines	Purines and purine derivatives	Xanthines
M137T523	(M-H)-	Urocanic acid	0.174141	0.892045	0.824347	137.035	523.245	5061.74	1143.15	778.999	1372.55	1375.86	959.446	1200.93	881.655	1004.47	518.51	4031.86	1900.09	1056.27	1121.39	1035.09	C00785	HMDB0000301/HMDB0034174	Cytoplasm (predicted from logP)	Organoheterocyclic compounds	Azoles	Imidazoles	Imidazolyl carboxylic acids and derivatives
M565T823	(M-H)-	Uridine diphosphate glucose(UDP-D-Glucose)	0.509922	0.489219	0.369088	565.046	823.249	2719.23	31234.7	7556.21	703.772	3171.57	7142.87	4296.29	9146.01	4963.67	1777.33	3546.41	1968.17	2595.31	2978.66	2972.04	C00029	HMDB0000286/HMDB0060079	Endoplasmic reticulum;Golgi apparatus	Nucleosides, nucleotides, and analogues	Pyrimidine nucleotides	Pyrimidine nucleotide sugars	Pyrimidine nucleotide sugars
M323T765	(M-H)-	Uridine 5'-monophosphate (UMP)	0.420345	1.06915	0.922029	323.027	764.602	6905.6	18125.5	1809.4	599.736	1452.88	969.837	1267.41	10718.8	1456.36	2059.47	4307.21	12118.6	1467.17	1184.29	1456	C00105	HMDB0000288	Cytoplasm;Extracellular;Mitochondria;Nucleus;Lysosome;Endoplasmic reticulum;Golgi apparatus	Nucleosides, nucleotides, and analogues	Pyrimidine nucleotides	Pyrimidine ribonucleotides	Pyrimidine ribonucleoside monophosphates
M579T892	(M-H)-	Uridine 5'-diphosphoglucuronic acid (UDP-D-glucuronate)	0.13627	0.90492	0.786788	579.025	891.596	1352.9	6404.47	2765.45	1190.94	2000.34	2050.55	2511.89	2098.09	3818.71	1272.76	3316.83	1247.48	1408	1302.52	1288.31	C00167	HMDB0000935	Endoplasmic reticulum;Golgi apparatus	Nucleosides, nucleotides, and analogues	Pyrimidine nucleotides	Pyrimidine nucleotide sugars	Pyrimidine nucleotide sugars
M403T829	(M-H)-	Uridine 5'-diphosphate (UDP)	0.616848	0.391149	0.339784	402.993	828.774	3237.13	46879	4925.83	1942.76	5471.12	8219.63	3812.73	9298.05	5964.3	2203.85	2888.77	3476.91	2848.59	2637.65	2846.72	C00015	HMDB0000295	Cytoplasm;Extracellular;Mitochondria;Nucleus;Lysosome;Endoplasmic reticulum;Golgi apparatus	Nucleosides, nucleotides, and analogues	Pyrimidine nucleotides	Pyrimidine ribonucleotides	Pyrimidine ribonucleoside diphosphates
M405T884	(M+H)+	Uridine 5'-diphosphate (UDP)	0.21587	0.455972	0.366632	405.009	883.984	793.62	10189.2	1722.01	543.192	609.921	2527.31	1137.05	3039.26	1358.67	590.427	640.909	704.885	758.556	758.227	716.32	C00015	HMDB0000295	Cytoplasm;Extracellular;Mitochondria;Nucleus;Lysosome;Endoplasmic reticulum;Golgi apparatus	Nucleosides, nucleotides, and analogues	Pyrimidine nucleotides	Pyrimidine ribonucleotides	Pyrimidine ribonucleoside diphosphates
M245T317	(M+H)+	Uridine	1.24754	1.12204	0.382175	245.076	317.082	251349	155952	231554	157647	230526	213156	221207	196799	315457	167990	275746	214337	168991	172675	172720	C00299	HMDB0000296	Extracellular;Mitochondria;Nucleus;Lysosome	Nucleosides, nucleotides, and analogues	Pyrimidine nucleosides		Pyrimidine nucleosides
M167T602	(M-H)-	Uric acid	0.277206	0.6776	0.20487	167.021	602.016	26778.1	26135.9	10503.7	13484.1	8688.72	9935.27	8390.89	7772.51	13698.8	8526.14	8462.04	17877.8	6986.95	6986.92	6602.15	C00366	HMDB0000289	Extracellular;Peroxisome	Organoheterocyclic compounds	Imidazopyrimidines	Purines and purine derivatives	Xanthines
M169T657	(M+H)+	Uric acid	0.0887133	0.747641	0.252198	169.035	657.075	2050.05	1858.15	987.467	1167.23	687.009	718.783	806.926	815.137	1040.52	567.366	1063.13	1290.83	543.116	546.984	486.689	C00366	HMDB0000289	Extracellular;Peroxisome	Organoheterocyclic compounds	Imidazopyrimidines	Purines and purine derivatives	Xanthines
M61T183	(M+H)+	Urea	0.606261	0.497787	0.0960107	61.0385	183.133	15087.8	11404.1	6545.51	4033.42	7178.19	2695.95	2916.58	3577.31	7358.57	2094.94	6215.36	1205.86	2216.98	2238.52	1831.97	C00086	HMDB0000294	Extracellular;Mitochondria	Organic acids and derivatives	Organic carbonic acids and derivatives	Ureas	Ureas
M111T470	(M-H)-	Uracil	1.46664	0.50918	0.000920394	111.019	470.481	30844.6	53228.1	44385.4	38046.1	38436.8	34321.7	27227.3	27015.7	20029.4	20483.5	17560.3	9511.77	22200.5	22360.4	20096.9	C00106	HMDB0000300	Extracellular	Organoheterocyclic compounds	Diazines	Pyrimidines and pyrimidine derivatives	Pyrimidones
M111T470	(M-H)-	Uracil	1.46664	0.50918	0.000920394	111.019	470.481	30844.6	53228.1	44385.4	38046.1	38436.8	34321.7	27227.3	27015.7	20029.4	20483.5	17560.3	9511.77	22200.5	22360.4	20096.9	C00106	HMDB0000300	Extracellular	Organoheterocyclic compounds	Diazines	Pyrimidines and pyrimidine derivatives	Pyrimidones
M185T78	(M-H)-	Undecanoic Acid	1.68438	0.151747	0.0116637	185.153	78.4665	20866.4	25604.4	64769.2	56855.9	21916.4	9091.03	9565.48	4077	2826.29	3858.07	6564.24	3322.27	3914.23	3943.14	4162.52	C17715	HMDB0000947	Extracellular;Membrane (predicted from logP)	Lipids and lipid-like molecules	Fatty Acyls	Fatty acids and conjugates	Medium-chain fatty acids
M185T78	(M-H)-	Undecanoic Acid	1.68438	0.151747	0.0116637	185.153	78.4665	20866.4	25604.4	64769.2	56855.9	21916.4	9091.03	9565.48	4077	2826.29	3858.07	6564.24	3322.27	3914.23	3943.14	4162.52	C17715	HMDB0000947	Extracellular;Membrane (predicted from logP)	Lipids and lipid-like molecules	Fatty Acyls	Fatty acids and conjugates	Medium-chain fatty acids
M606T804	(M-H)-	UDP-N-acetylglucosamine	1.32939	0.496582	0.30825	606.072	803.904	29751.3	196145	42420.2	12842.8	30630.3	50380.1	29780.3	52718.6	37276	11668.2	32138.8	16264.6	15575.7	15570.6	15788.2	C00043	HMDB0000290	Golgi apparatus	Nucleosides, nucleotides, and analogues	Pyrimidine nucleotides	Pyrimidine nucleotide sugars	Pyrimidine nucleotide sugars
M608T862	(M+H)+	UDP-N-acetylglucosamine	0.337741	0.523314	0.255007	608.088	862.219	3199.75	16418.8	3901.64	2017.59	3223.88	5534.93	3111.11	4837.58	3639.13	1088.99	3321.02	1950.06	2264.26	2210.44	2210.48	C00043	HMDB0000290	Golgi apparatus	Nucleosides, nucleotides, and analogues	Pyrimidine nucleotides	Pyrimidine nucleotide sugars	Pyrimidine nucleotide sugars
M360T850	(M+CH3CN+Na)+	Tyr-Asp	0.175969	0.766889	0.0858097	360.123	850.057	1909.91	2767.13	2132.45	2074.48	1839.43	1567.7	1660.35	1772.46	1855.44	845.217	2092.26	1200.18	967.386	953.451	1023.91
M120T512	(M+H-H2O)+	Tyramine	2.10184	0.424683	0.0134677	120.08	512.144	171041	121228	60051	111002	75803.9	53543.8	36166.4	27260.1	57745.2	31979	57918.5	40627.8	18865.5	19324.4	19324.7	C00483	HMDB0000306	Cytoplasm	Benzenoids	Benzene and substituted derivatives	Phenethylamines	Phenethylamines
M76T651_2	(M+H)+	Trimethylamine N-oxide	1.67551	0.681921	0.0108071	76.075	650.954	141296	126634	148393	108401	114725	120144	91001.9	81416.9	113791	87824.5	107796	36151.9	58616.6	58617.1	60949.3	C01104	HMDB0000925	Cytoplasm (predicted from logP)	Organic nitrogen compounds	Organonitrogen compounds	Aminoxides	Trialkyl amine oxides
M213T836	(M+CH3CN+Na)+	Triethanolamine	0.735882	0.560326	0.225366	213.123	836.255	46129.2	21935.5	13666.7	7286.92	11384.5	8434.53	7508.98	10184.4	14105.6	5804.59	14947.4	8433.42	5919.74	5676.08	5684.63	C06771	HMDB0032538	Cytoplasm;Extracellular	Organonitrogen compounds	Amines	Alkanolamines	1,2-aminoalcohols
M213T76	(M-H)-	Tridecanoic acid (Tridecylic acid)	0.670146	0.540371	0.085676	213.186	76.362	6459.94	6418.89	20179	22904.1	11006.2	8532.18	8377.27	5344.07	9518.3	4504.53	6415	6639	6551.75	6310.36	6310.11	C17076	HMDB0000910	Extracellular;Membrane (predicted from logP)	Lipids and lipid-like molecules	Fatty Acyls	Fatty acids and conjugates	Long-chain fatty acids
M149T512	(M+H)+	trans-cinnamate	0.458397	0.449433	0.0426021	149.058	512.487	12056.4	5764.24	4139.46	5407.38	4277.05	2807.22	2674.43	1570.15	3227.65	2225.81	3398.42	2387.25	850.841	850.433	729.641	C00423
M127T174	(M+H)+	Thymine	0.558312	0.467285	0.00915285	127.049	174.099	8268.1	8740.15	5376.32	8859.26	6011.62	4226.88	738.715	1430.48	5389.5	2264.3	4701.13	4859.95	2035.92	1322.62	1365.57	C00178	HMDB0000262	Extracellular	Organoheterocyclic compounds	Diazines	Pyrimidines and pyrimidine derivatives	Hydroxypyrimidines
M241T179	(M-H)-	Thymidine	0.717077	0.773611	0.260252	241.082	178.52	99232.4	89680	67309.3	110105	67817.8	31384.2	38516.2	70898.6	92820.1	32652	56634.5	68616.6	15170.5	15165.3	16235.6	C00214	HMDB0000273	Extracellular;Mitochondria;Lysosome	Nucleosides, nucleotides, and analogues	Pyrimidine nucleosides	Pyrimidine 2'-deoxyribonucleosides	Pyrimidine 2'-deoxyribonucleosides
M759T98	(M+Na)+	Thioetheramide-PC	13.2989	2.27745	0.0532672	758.567	98.436	838988	693614	892996	883840	1.15318e+06	1.12149e+06	1.24844e+06	1.82188e+06	2.34111e+06	2.54839e+06	446724	4.31101e+06	1.33412e+06	1.33421e+06	1.31367e+06
M345T877	(M+H)+	Thiamine monophosphate	0.0183479	0.892524	0.229198	345.07	876.821	1726.23	1451.49	1258.9	1403.64	1239.44	1262.14	1428.09	1356.31	1102.78	861.965	1324.06	1372.09	1320.14	1265.54	1137.86	C01081	HMDB0002666	Cytoplasm;Extracellular;Membrane (predicted from logP);Mitochondria	Organoheterocyclic compounds	Diazines	Pyrimidines and pyrimidine derivatives	Thiamine phosphates
M265T754	M+	Thiamine	0.484793	0.767322	0.379502	265.111	754.097	29028.4	22761.8	28585	20257.6	22602.8	33471	36992.1	19528.7	40698.7	9318.07	8694.94	5011.94	7345.13	8009.9	8035.67	C00378	HMDB0000235	Extracellular;Membrane (predicted from logP);Mitochondria	Organoheterocyclic compounds	Diazines	Pyrimidines and pyrimidine derivatives	Thiamines
M126T652	(M+H)+	Taurine	0.185228	1.46265	0.386419	126.021	651.804	4485.44	6763.43	7017.09	4319.7	5972.68	8048.48	5335.65	10342.8	5673.29	4394.97	23518.5	4277.88	4647.04	4848.9	4661.84	C00245	HMDB0000251	Extracellular;Peroxisome	Organic acids and derivatives	Organic sulfonic acids and derivatives	Organosulfonic acids and derivatives	Organosulfonic acids
M341T676	(M-H)-	Sucrose	3.33567	2.43927	0.100816	341.108	676.018	77077.3	19476.3	39221.4	98795.6	67217.2	20727.3	261103	93468	46880.4	31458.8	105490	248301	44862.2	45952.9	45951.9	C00089	HMDB0000258/HMDB0125600	Extracellular	Organic oxygen compounds	Organooxygen compounds	Carbohydrates and carbohydrate conjugates	O-glycosyl compounds
M117T716_2	(M-H)-	Succinate	1.20422	1.07343	0.696188	117.019	715.942	60653.2	87733.1	60659.7	51497.5	61218.3	45037.1	40517.8	65713.1	98744.8	51523.4	87822.2	49410.3	27569.7	27716.4	28874.5	C00042	HMDB0000254	Extracellular;Mitochondria;Endoplasmic reticulum;Peroxisome	Organic acids and derivatives	Carboxylic acids and derivatives	Dicarboxylic acids and derivatives	Dicarboxylic acids and derivatives
M428T356	(M+H)+	Stearoylcarnitine	1.2797	0.476019	0.0928908	428.372	356.298	37735.8	31114.1	50485.1	11161.2	54994.6	35854.6	1312.69	3953.44	53523.4	1807.82	23360.2	21407	821.536	867.25	982.088		HMDB0000848	Cytoplasm;Extracellular;Membrane;Mitochondria;	Lipids and lipid-like molecules	Fatty Acyls	Fatty acid esters	Acyl carnitines
M277T74	(M+H)+	Stearidonic Acid	1.85471	1.14688	0.592668	277.215	74.459	137597	104794	92469.5	23217.5	96911.1	201228	115746	122601	78599.1	130453	105499	199707	86763.3	86763.7	88721.4
M283T1149	(M-H)-	Stearic acid	0.951588	1.1867	0.532738	283.263	1149.04	12517.2	68117.4	18427.7	25946.7	33625.3	33461.1	54426.5	31911.9	47522.1	39826.3	30360.3	23912.4	45798.9	47961.9	56104.3	C01530	HMDB0000827	Cytoplasm;Extracellular;Membrane	Lipids and lipid-like molecules	Fatty Acyls	Fatty acids and conjugates	Long-chain fatty acids
M477T50	(M-2H+3Na)+	Squalene	0.510919	0.282106	0.346558	477.355	50.055	3446.78	4738.22	53636.9	2585.23	2363.95	2927.39	3332.37	5328.08	1460.91	5524.53	2198.89	1817.54	3393.79	3050.6	3037.66	C00751	HMDB0000256	Extracellular;Membrane (predicted from logP);Endoplasmic reticulum	Lipids and lipid-like molecules	Prenol lipids	Triterpenoids	Triterpenoids
M300T153_2	(M+H)+	Sphingosine	0.575945	0.68104	0.0303069	300.289	152.578	31852.9	18923.1	20471.6	19826.1	21618	15959.5	14011.8	11167.9	15578.9	9505.02	18537.4	18815.7	14303.1	14363.5	12078.8	C00319	HMDB0000252	Cytoplasm;Extracellular;Membrane (predicted from logP);Lysosome;Endoplasmic reticulum	Organic nitrogen compounds	Organonitrogen compounds	Amines	1,2-aminoalcohols
M732T356	(M+H)+	Sphingomyelin (d18:1/18:0)	2.16369	2.10587	0.0409955	731.603	355.888	20453.2	9521.25	27479.7	58542	31079.2	34415.8	73224.7	25091.9	50700.1	81659.7	41195.4	110326	29258.3	27921.2	27892	C00550	HMDB0001348/HMDB0010168/HMDB0010169/HMDB0011698/HMDB0011699/HMDB0012084/HMDB0012085/HMDB0012087/HMDB0012088/HMDB0012089/HMDB0012090/HMDB0012091/HMDB0012092/HMDB0012093/HMDB0012094/HMDB0012095/HMDB0012096/HMDB0012100/HMDB0012101/HMDB0012102/HMDB0012103/HMDB0012104/HMDB0012105/HMDB0012107/HMDB0013461/HMDB0013462/HMDB0013463/HMDB0013464/HMDB0013465/HMDB0013466/HMDB0013467/HMDB0013468/HMDB0013469	Extracellular;Membrane	Lipids and lipid-like molecules	Sphingolipids	Phosphosphingolipids	Phosphosphingolipids
M302T76	(M+H)+	Sphinganine	0.923462	1.85602	0.0934372	302.304	76.41	3506.02	5169.14	12996.7	22656	6542.06	6896.41	23006.6	15766.3	9567.58	11083.7	16181.6	31609.6	4822.13	4823.65	4900.73	C00836	HMDB0000269	Cytoplasm;Extracellular;Membrane (predicted from logP);Endoplasmic reticulum	Organic nitrogen compounds	Organonitrogen compounds	Amines	1,2-aminoalcohols
M214T724	(M-H)-	sn-Glycerol 3-phosphoethanolamine	3.40149	0.729668	0.25407	214.049	723.834	729048	1.18017e+06	647492	289314	609750	429546	603638	516185	718395	327590	438495	230695	276752	276861	285175	C01233	HMDB0000114	Cytoplasm
M216T784	(M+H)+	sn-Glycerol 3-phosphoethanolamine	2.35907	0.610414	0.0441032	216.062	784.162	208136	269140	159956	106223	149584	116869	121472	106386	148112	73071	112359	55061	68234.6	68234	68609.7	C01233	HMDB0000114	Cytoplasm
M298T152	(M+H)+	S-Methyl-5'-thioadenosine	0.847522	1.24573	0.566294	298.096	152.24	15931.6	89329.1	55788.3	148174	108423	64351.2	120693	221575	107367	53701.8	53905.2	43198.8	84325.7	78351.1	84282.9	C00170	HMDB0001173	Cytoplasm (predicted from logP)	Nucleosides, nucleotides, and analogues	5'-deoxyribonucleosides	5'-deoxy-5'-thionucleosides	5'-deoxy-5'-thionucleosides
M296T182	(M-H)-	S-Methyl-5'-thioadenosine	0.222174	1.00098	0.996057	296.081	182.442	3053.65	4493.11	3098.9	3245.6	2475.76	1450.57	1773.98	4363.5	3937.26	2716.19	2195.4	2848.76	1996.19	2017.48	2060.56	C00170	HMDB0001173	Cytoplasm (predicted from logP)	Nucleosides, nucleotides, and analogues	5'-deoxyribonucleosides	5'-deoxy-5'-thionucleosides	5'-deoxy-5'-thionucleosides
M235T826	(M+H)+	Ser-Glu	0.413451	0.285045	0.142221	235.092	825.673	3509.71	2599.21	1174.69	11485.5	2299.99	695.971	796.325	1097.53	825.699	1070.91	1481.1	932.469	579.371	717.507	719.015
M244T70	(M+CH3CN+H)+	Sebacic acid	0.781273	0.39264	0.366998	244.154	70.095	3280.78	2551.56	33665.1	71361.6	772.334	1558.66	22454.1	3894.93	2108.25	6242.23	1733.66	8009.88	8758.19	22343.8	22357.2	C08277	HMDB0000792	Membrane (predicted from logP)	Lipids and lipid-like molecules	Fatty Acyls	Fatty acids and conjugates	Medium-chain fatty acids
M90T668	(M+H)+	Sarcosine	0.573507	0.631656	0.233969	90.054	667.787	26298.2	4952.48	17359.4	8806.24	10608.5	9533.96	13625.2	4765.38	10614.5	6226.42	12943.5	815.564	10171.4	10189.6	10256.5	C00213	HMDB0000271	Extracellular;Mitochondria;Peroxisome	Organic acids and derivatives	Carboxylic acids and derivatives	Amino acids, peptides, and analogues	Alpha amino acids
M383T713	(M-H)-	S-Adenosyl-L-homocysteine	0.267469	1.06713	0.832355	383.112	712.579	1394.72	6772.45	3577.43	1184.6	2202.36	2248.18	3328.11	2072.52	3552.66	2338.58	3578.92	3675.68	1632.77	1751.38	1630.85	C00021	HMDB0000939	Mitochondria;Nucleus;Endoplasmic reticulum	Nucleosides, nucleotides, and analogues	5'-deoxyribonucleosides	5'-deoxy-5'-thionucleosides	5'-deoxy-5'-thionucleosides
M257T256	(M-H)-	Ribothymidine	0.160635	0.724837	0.129469	257.077	255.746	3970.42	2701.67	2135.53	2168.67	3086.17	1477.01	1899.57	1626.5	2561.7	881.107	2395.64	1899.05	1010.42	921.698	1009.98		HMDB0000884	Cytoplasm;	Nucleosides, nucleotides, and analogues	Pyrimidine nucleosides		Pyrimidine nucleosides
M377T432	(M+H)+	Riboflavin	0.399475	0.641525	0.113919	377.145	432.173	15701.1	12069.1	6592.32	4761.14	8542.77	5975.53	5545.08	5697.48	8806.69	3809.3	4361.62	6192.51	2560.75	2508.51	2838.71	C00255	HMDB0000244	Extracellular	Organoheterocyclic compounds	Pteridines and derivatives	Alloxazines and isoalloxazines	Flavins
M375T380	(M-H)-	Riboflavin	0.0472374	0.856088	0.462599	375.129	380.264	2135.26	847.133	1064.05	1027.53	1272.52	894.851	666.876	999.16	1499.25	952.475	888.485	1192.98	803.114	803.932	839.154	C00255	HMDB0000244	Extracellular	Organoheterocyclic compounds	Pteridines and derivatives	Alloxazines and isoalloxazines	Flavins
M345T72	(M+CH3COO+2H)+	Retinene	1.62459	0.577314	0.0157934	345.242	71.795	91113.4	82905.8	126429	48880.5	101384	81501.9	78181.6	39928.1	56812.3	35619.4	65717.3	30995.9	36116.4	35775.2	35278.8	C00376	HMDB0001358	Cytoplasm;Extracellular;Membrane (predicted from logP)	Lipids and lipid-like molecules	Prenol lipids	Retinoids	Retinoids
M503T797	(M-H)-	Raffinose	0.333702	1.38474	0.270592	503.161	796.844	1982.94	1403.21	1681.17	1671.35	2174.53	1154.98	3114.18	2718.31	1935.81	809.004	1097.49	4267.02	674.797	743.453	741.378	C00492	HMDB0003213	Cytoplasm (predicted from logP)	Organic oxygen compounds	Organooxygen compounds	Carbohydrates and carbohydrate conjugates	Oligosaccharides
M522T902	(M+NH4)+	Raffinose	0.311309	1.17109	0.474281	522.201	901.65	1812.91	2463.99	2180.31	2800.72	2315.59	5236.07	3564.96	2749.04	4071.75	3632.09	1546.3	4121.35	2178.68	2158.78	2158.86	C00492	HMDB0003213	Cytoplasm (predicted from logP)	Organic oxygen compounds	Organooxygen compounds	Carbohydrates and carbohydrate conjugates	Oligosaccharides
M109T918	(M+H)+	Quinone	0.229406	0.745124	0.276949	109.027	917.554	4028.43	4325.72	3635.22	502.79	2700.68	2681.94	2380.68	1734.46	3194.58	1823.93	3102.01	1083.27	1075.11	1080.6	1289.11	C00472/C15602	HMDB0003364	Cellular Locations Not Available	Organic oxygen compounds	Organooxygen compounds	Carbonyl compounds	P-benzoquinones
M159T828	(M-H2O-H)-	Pyrophosphate	0.862195	1.02925	0.900468	158.925	828.04	20365.1	46523	28900.6	6494.87	32991.9	24307.6	26815.7	32888.1	35717.2	20697.1	19321.5	28811.1	16898.9	18195.4	18120.1
M285T813	(M+K-2H)-	Pyridoxamine 5'-phosphate	0.112677	0.815761	0.362717	285	813.166	1738.15	2744.82	4231.24	3020.96	4136.85	3682.96	2881.71	2646.19	4447.52	1542.22	3330.07	1104.47	3440.42	3638.12	4748.49	C00647	HMDB0001555	Mitochondria	Organoheterocyclic compounds	Pyridines and derivatives	Pyridoxamines	Pyridoxamine 5'-phosphates
M168T195	(M+H)+	Pyridoxal (Vitamin B6)	0.631612	0.679226	0.306012	168.065	195.344	53442	34456.9	11852.9	22140.9	8727.56	21120.3	14912.3	14932.8	31128.3	5741.15	17921.3	18430.1	11062.6	11062.5	7774.41	C00250	HMDB0001545	Cytoplasm;Extracellular	Organoheterocyclic compounds	Pyridines and derivatives	Pyridine carboxaldehydes	Pyridoxals and derivatives
M121T224	(M+H)+	Purine	0.366424	0.455934	0.0779465	121.049	223.8	5570.71	7109.53	3154.02	1859.19	1820.78	1910.4	776.511	1716.5	1363.81	1263.37	3326.78	1321.25	1576.91	1622.45	1572.46	C15587	HMDB0001366	Cytoplasm (predicted from logP)	Organoheterocyclic compounds	Imidazopyrimidines	Purines and purine derivatives	Purines and purine derivatives
M119T212	(M-H)-	Purine	0.170065	0.846602	0.265603	119.035	211.953	13158.1	12792.6	11097.6	7580.74	9455.64	8377.43	7045.45	5167.46	11318	9645.21	8684.46	11019.9	4947.31	4927.41	5352.55	C15587	HMDB0001366	Cytoplasm (predicted from logP)	Organoheterocyclic compounds	Imidazopyrimidines	Purines and purine derivatives	Purines and purine derivatives
M243T435	(M-H)-	Pseudouridine	0.922708	0.500602	0.142012	243.062	435.261	32585.2	12524.7	9312.61	42480.7	19939.1	6626.47	6741.98	7568.21	23524.1	5600.14	6305.23	12068.9	2928.02	3204.53	2932.78	C02067	HMDB0000767	Cytoplasm (predicted from logP)	Nucleosides, nucleotides, and analogues	Nucleoside and nucleotide analogues		Nucleoside and nucleotide analogues
M353T433	(M+H)+	Prostaglandin I2	0.696324	1.04398	0.92293	353.232	432.805	50905	39113.7	25667.1	3391.86	25421.2	55552.7	29078.8	768.903	31289.4	23440.2	31527	92746	13146.3	13149.5	13305	C01312	HMDB0001335	Extracellular;Membrane (predicted from logP);Endoplasmic reticulum	Lipids and lipid-like molecules	Fatty Acyls	Eicosanoids	Prostaglandins and related compounds
M351T80	(M-H)-	Prostaglandin H2	2.62482	0.39594	0.106238	351.217	79.895	280579	224257	56051.6	13710.1	49252.5	202293	47647.1	25135	107751	42144.7	52302.9	52122.5	28464.1	30247.8	30260.8	C00427	HMDB0001381	Cytoplasm;Extracellular;Membrane;Endoplasmic reticulum	Lipids and lipid-like molecules	Fatty Acyls	Eicosanoids	Prostaglandins and related compounds
M351T232	(M-H)-	Prostaglandin E2	2.32952	0.674918	0.463217	351.217	231.82	303117	110178	104827	32459.8	135053	632004	103072	72559.8	198452	118974	164166	232075	65007.9	67221.4	67214.2	C00584	HMDB0001220	Cytoplasm;Extracellular;Membrane;Endoplasmic reticulum	Lipids and lipid-like molecules	Fatty Acyls	Eicosanoids	Prostaglandins and related compounds
M351T179	(M-H)-	Prostaglandin D2(PGD2)	2.71202	0.73169	0.443738	351.216	179.498	176006	23250.5	557140	352694	360714	738318	197124	189935	555833	168266	367826	136677	89216	92730.8	88365.5
M370T238	(M+NH4)+	Prostaglandin D2(PGD2)	1.71712	0.339203	0.00190605	370.258	238.423	75570.6	42303.2	52774	23581.7	42727.1	62550.3	17950.8	12746.9	27508.6	10599.2	22453.5	10334.6	8892.31	7764.91	8876.73
M335T226	(M-H2O-H)-	Prostaglandin D1	0.866986	0.582385	0.311106	335.221	225.633	16527.4	13732.5	12448.9	3929.57	13167.9	54598.1	12533.1	6875.28	17196.8	8576.11	9636.88	11809.3	5409.11	5651.57	5650.79	C06438	HMDB0005102	Extracellular;Membrane	Lipids and lipid-like molecules	Fatty Acyls	Eicosanoids	Prostaglandins and related compounds
M335T182	(M-H)-	Prostaglandin B1	2.11184	0.699395	0.588166	335.221	182.35	29815.8	20712.6	87602.3	24130.3	88303.6	363244	80417.5	34448	112232	46132.2	66144.4	89920.6	16019.9	16011.6	16733.5	C00959	HMDB0002982	Extracellular;Membrane (predicted from logP)	Lipids and lipid-like molecules	Fatty Acyls	Eicosanoids	Prostaglandins and related compounds
M245T603	(M+H-H2O)+	Pro-Phe	0.111086	0.862251	0.599682	245.124	603.284	1689.66	3908.77	1463.4	1507.11	1171.93	1279.88	1534.37	1548.84	1230.11	1994.15	2277.62	917.551	1853.35	1877.18	1129.54
M187T664	(M+H)+	Pro-Ala	0.0438914	0.942736	0.829359	187.107	664.202	3044.89	846.758	1536.01	1398	832.818	1299.87	1088.43	989.735	1398.19	1427.03	2331.94	1210.04	1444.04	1444.04	1445.47
M311T70_2	(M-H)-	Phytanic acid	0.581074	0.986428	0.971897	311.294	70.179	8365.88	7306.22	7107.97	25590	5933.87	6289.67	7330.99	8435.14	7407.52	14723.3	3864.16	18010.1	9968.88	9623.02	10256	C01607	HMDB0000801	Cytoplasm;Extracellular;Membrane;Peroxisome	Lipids and lipid-like molecules	Prenol lipids	Diterpenoids	Acyclic diterpenoids
M354T54	(M+CH3CN+H)+	Phytanic acid	0.162306	0.893603	0.64753	354.336	54.244	57581.6	60197.9	30106	42228.1	37782.8	27080.5	5024.59	58845.8	43626.7	38400.8	51818.6	30131.6	38420.8	37666.9	38177.6	C01607	HMDB0000801	Cytoplasm;Extracellular;Membrane;Peroxisome	Lipids and lipid-like molecules	Prenol lipids	Diterpenoids	Acyclic diterpenoids
M279T49	(M+H)+	Phthalic acid Mono-2-ethylhexyl Ester	1.07586	0.6033	0.0689581	279.158	49.448	179535	115716	64376.5	93842.3	62711.2	189768	64870.7	61735.5	78055.2	81196.7	67830.1	72211	71372.9	66882.9	66670.5
M184T81	(M+H)+	Phosphorylcholine	2.02653	1.82839	0.0770759	184.072	80.767	37275.5	29448.7	78167.2	39531.7	65630.8	29537.5	37218.3	67569.9	117872	69184.3	63331.7	156027	34361.2	41427.3	41246.3	C00588	HMDB0001565	Cytoplasm (predicted from logP)	Organic nitrogen compounds	Organonitrogen compounds	Quaternary ammonium salts	Phosphocholines
M177T896	(M+Na-2H)-	Phosphoglycolic acid	0.225718	1.20577	0.276407	177.003	895.582	1640.2	1102.85	1247.22	472.655	1416.35	1386.83	1999.55	1509.89	1217.41	1592.38	1451.15	990.892	1529.76	1695.48	1691.16	C00988	HMDB0000816	Cytoplasm (predicted from logP)	Organic acids and derivatives	Organic phosphoric acids and derivatives	Phosphate esters	Monoalkyl phosphates
M335T847	(2M-H)-	Phosphoenolpyruvate	2.11931	0.670431	0.0843595	334.957	846.763	154345	346616	239092	122874	266353	197434	199705	146446	199149	121217	142536	80417.6	116918	119801	121269	C00074	HMDB0000263	Cytoplasm;Mitochondria	Organic acids and derivatives	Organic phosphoric acids and derivatives	Phosphate esters	Phosphate esters
M335T847	(2M-H)-	Phosphoenolpyruvate	2.11931	0.670431	0.0843595	334.957	846.763	154345	346616	239092	122874	266353	197434	199705	146446	199149	121217	142536	80417.6	116918	119801	121269	C00074	HMDB0000263	Cytoplasm;Mitochondria	Organic acids and derivatives	Organic phosphoric acids and derivatives	Phosphate esters	Phosphate esters
M169T907	(M+H)+	Phosphoenolpyruvate	0.404296	0.710973	0.0878202	168.989	907.43	13004.4	27163.6	23483.7	9920.43	21509.7	19754.7	17492.4	14684.3	15248	12342.5	13161.5	8716.98	12656.8	12727.6	12776.9	C00074	HMDB0000263	Cytoplasm;Mitochondria	Organic acids and derivatives	Organic phosphoric acids and derivatives	Phosphate esters	Phosphate esters
M212T877	(M+H)+	Phosphocreatine	1.64052	5.20635	0.0198118	212.042	876.96	2798.3	5756.12	4758.47	1417.84	7652.28	6996.5	3777.7	12090.7	24456.7	39937.9	20013.5	52683.7	17341.8	17342.4	17451.4	C02305	HMDB0001511	Mitochondria	Organic acids and derivatives	Carboxylic acids and derivatives	Amino acids, peptides, and analogues	Alpha amino acids and derivatives
M192T349	(M-H)-	Phenylacetylglycine	3.16217	0.192144	0.0849542	192.066	349.097	136303	33874.2	26466.2	302154	126443	13841.3	15962.1	18346.5	45796	3922.4	19190	19578.7	5448.67	5680.8	5678.86	C05598	HMDB0000821	Cellular Locations Not Available	Organic acids and derivatives	Carboxylic acids and derivatives	Amino acids, peptides, and analogues	N-acyl-alpha amino acids
M192T349	(M-H)-	Phenylacetylglycine	3.16217	0.192144	0.0849542	192.066	349.097	136303	33874.2	26466.2	302154	126443	13841.3	15962.1	18346.5	45796	3922.4	19190	19578.7	5448.67	5680.8	5678.86	C05598	HMDB0000821	Cellular Locations Not Available	Organic acids and derivatives	Carboxylic acids and derivatives	Amino acids, peptides, and analogues	N-acyl-alpha amino acids
M194T397	(M+H)+	Phenylacetylglycine	1.77734	0.234713	0.101204	194.081	397.056	81122.4	15443.8	15072	154808	54619.1	8677.7	8733.06	15241.6	26894.5	2960.16	8884	14681.7	1028.97	1026.84	957.473	C05598	HMDB0000821	Cellular Locations Not Available	Organic acids and derivatives	Carboxylic acids and derivatives	Amino acids, peptides, and analogues	N-acyl-alpha amino acids
M93T231	(M-H)-	Phenol	2.06177	0.567549	0.0781205	93.034	230.514	148647	175027	104340	59859.5	80534.4	58317.4	86231.6	65692.9	94540.3	35079.6	55644.3	18509	32428	32797.5	32440.4	C00146/C15584	HMDB0000228	Cellular Locations Not Available	Benzenoids	Phenols	1-hydroxy-4-unsubstituted benzenoids	1-hydroxy-4-unsubstituted benzenoids
M93T231	(M-H)-	Phenol	2.06177	0.567549	0.0781205	93.034	230.514	148647	175027	104340	59859.5	80534.4	58317.4	86231.6	65692.9	94540.3	35079.6	55644.3	18509	32428	32797.5	32440.4	C00146/C15584	HMDB0000228	Cellular Locations Not Available	Benzenoids	Phenols	1-hydroxy-4-unsubstituted benzenoids	1-hydroxy-4-unsubstituted benzenoids
M223T473	(M+H)+	Phe-Gly	0.320468	0.44977	0.05314	223.106	472.792	3160.85	1959.65	3078.69	6573.01	2273.55	1290.69	1298.46	1343.03	1395.66	1845.65	1045.81	1318.57	939.427	1415.31	1417.93
M703T205	(2M-H)-	PGF3a	0.503289	0.495985	0.585995	703.44	204.567	235.114	57.91	793.921	106.038	811.552	17593.9	515.326	358.936	1177.88	1355.05	2141.32	4172	262.114	261.521	290.201
M349T180	(M-H)-	PGE3	0.372085	0.776764	0.376803	349.201	180.118	60310.5	19532.6	34130.3	14918.4	31799.2	42351.2	15685.9	20864.1	35779.5	16546.9	44476.2	24363.3	8337.7	10512.6	10509.7
M370T185	(M+NH4)+	PGD2	1.36345	0.506197	0.246735	370.258	184.731	9632.36	8761.98	97114.3	43022	109198	189060	83653.8	18211.6	53044.7	39706	28001.2	8607.72	17453	17598.2	13400.7
M305T93	(2M+H)+	Perillyl alcohol	0.257162	0.812786	0.423189	305.246	92.534	14931.5	10567.5	9711.46	2056.85	6669.79	6994.73	8154.6	6113.9	8641.49	6539.04	4057.01	7890.63	4345.98	4346.25	4239.56
M241T75	(M-H)-	Pentadecanoic Acid	1.88489	1.62702	0.0233176	241.216	75.1945	21045.9	3875.2	40250.5	24378.8	41846.1	43692.5	46861.7	45259.8	52581.3	48073.5	37522.8	54574.6	37381.9	37466.9	39318.6	C16537	HMDB0000826	Cytoplasm;Extracellular;Membrane	Lipids and lipid-like molecules	Fatty Acyls	Fatty acids and conjugates	Long-chain fatty acids
M241T75	(M-H)-	Pentadecanoic Acid	1.88489	1.62702	0.0233176	241.216	75.1945	21045.9	3875.2	40250.5	24378.8	41846.1	43692.5	46861.7	45259.8	52581.3	48073.5	37522.8	54574.6	37381.9	37466.9	39318.6	C16537	HMDB0000826	Cytoplasm;Extracellular;Membrane	Lipids and lipid-like molecules	Fatty Acyls	Fatty acids and conjugates	Long-chain fatty acids
M333T236	(M-H)-	Penicillin G	5.78581	0.0142432	0.285148	333.09	235.501	1972.98	3145.45	8678.75	1.28181e+06	140951	3755.66	8274.64	4136.65	3035.65	2199.79	2383.3	484.601	2415.8	2489.21	2490.07
M157T80	(M-H)-	Pelargonic acid	1.16177	1.11394	0.248009	157.123	79.895	28108.5	29103.3	37899.4	38177.8	41552.9	23420.8	37279.5	34645	38343.2	35473.2	40522.5	34589.7	39611.5	43595.7	43590.6	C01601	HMDB0000847	Extracellular;Membrane	Lipids and lipid-like molecules	Fatty Acyls	Fatty acids and conjugates	Medium-chain fatty acids
M779T234	(M-H+2Na)+	PC(16:0/16:0)	2.73905	2.065	0.0254996	778.536	233.842	11264.2	14635.1	80645.7	36601.5	149189	171311	161479	204737	183620	123176	165001	119418	99053.8	82226	98241	C00157	HMDB0000564/HMDB0007878/HMDB0007879/HMDB0007880/HMDB0007882/HMDB0007884/HMDB0007886/HMDB0007887/HMDB0007897/HMDB0007898/HMDB0007911/HMDB0007912/HMDB0007913/HMDB0007914/HMDB0007936/HMDB0007937/HMDB0007938/HMDB0007939/HMDB0007940/HMDB0007958/HMDB0007959/HMDB0007960/HMDB0007961/HMDB0007964/HMDB0007966/HMDB0007967/HMDB0007981/HMDB0007982/HMDB0007983/HMDB0007984/HMDB0007985/HMDB0008002/HMDB0008003/HMD…	Cytoplasm;Extracellular;Membrane	Lipids and lipid-like molecules	Glycerophospholipids	Glycerophosphocholines	Phosphatidylcholines//1-acyl,2-(1Z-alkenyl)-glycerophosphocholines
M109T63	(M+H)+	para-Phenylenediamine	0.329521	1.16989	0.386714	109.075	63.466	5717.81	3034.59	2229.82	2921.63	3398.08	2977.46	3944.43	4891.72	3476.88	5327.74	3304.69	2779.28	2851.33	2494.56	2815.49
M204T118	(M-H)-	Pantothenol	0.721486	1.6667	0.0612519	204.124	118.183	1420.11	3982.45	2511.02	8879.76	4940.3	4523.84	10998.8	6660.9	7505.68	4095.77	7443.91	7058.24	2450.5	2466.83	2184.69	C05944	HMDB0004231	Cytoplasm (predicted from logP)	Lipids and lipid-like molecules	Fatty Acyls	Fatty amides	N-acyl amines
M218T497	(M-H)-	Pantothenate	0.723773	0.947937	0.862916	218.103	497.354	70275.9	56914.4	18352.9	23184.7	27026.2	24479.2	21011	35531.3	32350.1	29550.3	25753.5	64570.8	13532.1	14432.2	14403.5	C00864	HMDB0000210	Extracellular;Mitochondria	Organic oxygen compounds	Organooxygen compounds	Alcohols and polyols	Secondary alcohols
M300T57	(M+H)+	Palmitoyl ethanolamide	0.518659	1.22936	0.604699	300.289	56.558	51100	10169.9	11043.5	15153.5	17558.7	20065.2	12492.2	12091	16579.9	21858.8	45109.4	45650.9	15331	14711.2	14722.8
M255T91	(M-H)-	Palmitic acid	3.59317	0.544126	0.0951813	255.232	91.148	921594	563680	279306	284773	303146	269063	231682	184992	257967	266995	268570	216255	256282	248105	256186	C00249	HMDB0000220	Cytoplasm;Extracellular;Membrane (predicted from logP);Endoplasmic reticulum;Peroxisome	Lipids and lipid-like molecules	Fatty Acyls	Fatty acids and conjugates	Long-chain fatty acids
M255T91	(M-H)-	Palmitic acid	3.59317	0.544126	0.0951813	255.232	91.148	921594	563680	279306	284773	303146	269063	231682	184992	257967	266995	268570	216255	256282	248105	256186	C00249	HMDB0000220	Cytoplasm;Extracellular;Membrane (predicted from logP);Endoplasmic reticulum;Peroxisome	Lipids and lipid-like molecules	Fatty Acyls	Fatty acids and conjugates	Long-chain fatty acids
M155T470	(M-H)-	Orotate	1.18795	0.611523	0.0290861	155.009	470.272	36423	75015.6	51576.7	44090.7	40230.1	48863.5	29750.4	45296.6	43579.6	26820.4	22144.2	13541.9	22274.7	20863.8	22248.6	C00295	HMDB0000226	Cytoplasm (predicted from logP)	Organoheterocyclic compounds	Diazines	Pyrimidines and pyrimidine derivatives	Pyrimidinecarboxylic acids
M155T470	(M-H)-	Orotate	1.18795	0.611523	0.0290861	155.009	470.272	36423	75015.6	51576.7	44090.7	40230.1	48863.5	29750.4	45296.6	43579.6	26820.4	22144.2	13541.9	22274.7	20863.8	22248.6	C00295	HMDB0000226	Cytoplasm (predicted from logP)	Organoheterocyclic compounds	Diazines	Pyrimidines and pyrimidine derivatives	Pyrimidinecarboxylic acids
M157T470	(M+H)+	Orotate	0.389625	0.693262	0.121381	157.023	470.217	7302.05	8216.11	6338.14	2774.18	5799.85	5846.53	5591.23	4568.55	6035.31	2854.17	5164.21	935.893	3145.55	2958.76	2969.68	C00295	HMDB0000226	Cytoplasm (predicted from logP)	Organoheterocyclic compounds	Diazines	Pyrimidines and pyrimidine derivatives	Pyrimidinecarboxylic acids
M258T870	(M+CH3COO)-	O-Phospho-L-homoserine	0.241684	0.701535	0.194491	258.038	869.853	5401.45	4802.11	8109.23	2268.9	7529.54	5368.85	6154.84	2056.18	3891.41	1978.75	6667.61	2738.67	1718.66	1818.85	1727.69	C01102	HMDB0003484	Cellular Locations Not Available	Organic acids and derivatives	Carboxylic acids and derivatives	Amino acids, peptides, and analogues	L-alpha-amino acids
M140T845	(M-H)-	O-Phosphoethanolamine	1.1173	0.911649	0.726288	140.011	845.178	72645.5	117404	62512.4	17528.9	49606.1	39533.8	57327	58612.2	74549.9	41867.4	47225.6	47910.1	27694.9	27722.3	28973.5	C00346	HMDB0000224	Cytoplasm;Endoplasmic reticulum	Organic acids and derivatives	Organic phosphoric acids and derivatives	Phosphate esters	Phosphoethanolamines
M142T908	(M+H)+	O-Phosphoethanolamine	1.00057	0.9999	0.999622	142.025	908.178	73507.7	109476	68399.6	17959.3	55658.6	55119.5	65421.8	70100.5	79859.8	47465.9	59012.4	58222.2	34848.5	34657.9	34659.8	C00346	HMDB0000224	Cytoplasm;Endoplasmic reticulum	Organic acids and derivatives	Organic phosphoric acids and derivatives	Phosphate esters	Phosphoethanolamines
M281T180	(M-H)-	Oleic acid	1.55302	0.53066	0.0398866	281.248	179.723	78026.3	78589.8	61411.8	39119.5	48174.2	32447.1	41750.6	21475.3	63759.5	17809.2	19015.7	15430	19271	17160	17062.1	C00712	HMDB0000207	Extracellular;Membrane (predicted from logP)	Lipids and lipid-like molecules	Fatty Acyls	Fatty acids and conjugates	Long-chain fatty acids
M281T180	(M-H)-	Oleic acid	1.55302	0.53066	0.0398866	281.248	179.723	78026.3	78589.8	61411.8	39119.5	48174.2	32447.1	41750.6	21475.3	63759.5	17809.2	19015.7	15430	19271	17160	17062.1	C00712	HMDB0000207	Extracellular;Membrane (predicted from logP)	Lipids and lipid-like molecules	Fatty Acyls	Fatty acids and conjugates	Long-chain fatty acids
M339T1208	(M-H)-	Norethindrone Acetate	1.03104	0.951156	0.782105	339.199	1207.98	78537.1	67914.6	61456.2	21124.5	61503.4	57072.5	59370.2	64996.9	29035.2	71396.6	52884.4	52946.4	42844.5	57194.4	59513.7
M297T76_2	(M-H)-	Nname,cis-9,10-Epoxystearic acid	2.45309	1.13623	0.441514	297.242	76.168	145184	166717	111654	39275.4	171496	156995	162868	161948	123805	168490	118592	163420	117672	117952	122858
M355T811	(M+Na-2H)-	Nicotinamide ribotide	0.329692	0.97675	0.860616	355.039	810.651	8594.89	15041.2	13371.2	12317.9	7889.45	9658.13	13019.7	12380.2	11378.3	8589.49	11881.7	8068.57	11096.9	11095.4	11448.7	C00455	HMDB0000229	Cytoplasm;Mitochondria;Nucleus	Nucleosides, nucleotides, and analogues	Pyridine nucleotides	Nicotinamide nucleotides	Nicotinamide nucleotides
M139T305	(M+H)+	Nicotinamide N-oxide	0.700522	0.560735	0.25208	139.049	304.509	45961.5	15491	9162.19	25799.4	12648.7	4074.75	7258.43	12470.5	23635.5	3303.07	8659.85	8112.79	3392.97	3319.28	3389.94		HMDB0002730	Cellular Locations Not Available	Organoheterocyclic compounds	Pyridines and derivatives	Pyridinecarboxylic acids and derivatives	Nicotinamides
M123T170	(M+H)+	Nicotinamide	2.62287	0.589339	0.0803618	123.054	169.717	483946	730319	443023	180327	405655	402056	321929	326038	450725	245172	29070.2	186059	242286	230604	231525	C00153	HMDB0001406	Extracellular	Organoheterocyclic compounds	Pyridines and derivatives	Pyridinecarboxylic acids and derivatives	Nicotinamides
M203T1039	(M+H)+	NG,NG-dimethyl-L-arginine(ADMA)	3.52477	0.563858	0.250605	203.15	1039.45	812385	788130	463787	279985	77869.1	140455	70963.5	107421	488993	30529.2	429564	317479	90408.3	120502	122374	C03626	HMDB0001539	Cytoplasm (predicted from logP)	Organic acids and derivatives	Carboxylic acids and derivatives	Amino acids, peptides, and analogues	Arginine and derivatives
M365T67	(M-H)-	Nervonic acid	0.138307	0.846329	0.273629	365.342	66.582	8936.48	7742.61	6883.93	8602.49	5160.25	5978.84	4302.65	5530.75	7813.6	7397.31	3787.11	7818.49	7285.23	7286.03	7461.24	C08323	HMDB0002368	Cytoplasm;Extracellular;Membrane (predicted from logP)	Lipids and lipid-like molecules	Fatty Acyls	Fatty acids and conjugates	Very long-chain fatty acids
M787T366	M+	N-Docosanoyl-4-sphingenyl-1-O-phosphorylcholine	1.0657	1.56414	0.0738162	786.651	365.913	8017.78	19612.6	7808.64	8997.03	9344.59	22247.6	18878.2	28839.1	10702.6	22599.5	18600.4	19299.5	20004.4	20000.7	20187.3
M175T771	(M-H)-	N-carbamoyl-L-aspartate	0.866895	0.897504	0.693544	175.036	770.642	86871.8	131559	102762	36837.7	92526.8	77686.3	99689.4	80605.2	148155	55180.3	76253.5	14217.7	39056.8	41099.3	41095.4	C00438	HMDB0000828	Cytoplasm	Organic acids and derivatives	Carboxylic acids and derivatives	Amino acids, peptides, and analogues	Aspartic acid and derivatives
M177T830	(M+H)+	N-carbamoyl-L-aspartate	0.341119	0.886093	0.589954	177.05	830.495	13392.9	19441.6	15471.5	8627.69	15064.6	13002.9	16237.2	14079.2	21509.3	9223.27	10538.4	3731.62	6538.49	6538	6775.21	C00438	HMDB0000828	Cytoplasm	Organic acids and derivatives	Carboxylic acids and derivatives	Amino acids, peptides, and analogues	Aspartic acid and derivatives
M308T689	(M-H)-	N-Acetylneuraminic acid	0.373977	0.792639	0.445249	308.097	688.534	20029	11182.1	7011.07	5862.51	7319.22	5644.05	7996.47	4970.13	12067.3	5745.31	7988.31	6450.94	2442.66	2447.45	2293.43	C00270	HMDB0000230	Cytoplasm;Membrane;Nucleus;Lysosome;	Organic oxygen compounds	Organooxygen compounds	Carbohydrates and carbohydrate conjugates	N-acylneuraminic acids
M222T518	(M+H)+	N-Acetylmannosamine	0.298515	0.57429	0.157627	222.096	518.163	5606.43	9814.84	2131.45	3546.88	2264.31	3666.02	2474.75	1769.56	4631.67	2591.81	2271.96	1783.28	1244.73	1379.53	1380.03	C00645	HMDB0001129	Cytoplasm (predicted from logP)	Organic oxygen compounds	Organooxygen compounds	Carbohydrates and carbohydrate conjugates	Acylaminosugars
M220T517	(M-H)-	N-Acetylmannosamine	0.215071	0.418989	0.191894	220.082	516.796	834.348	4759.7	771.376	964.23	1769.89	514.589	386.94	931.441	942.751	347.802	513.192	906.094	256.832	240.249	240.763	C00645	HMDB0001129	Cytoplasm (predicted from logP)	Organic oxygen compounds	Organooxygen compounds	Carbohydrates and carbohydrate conjugates	Acylaminosugars
M228T886	(M+K)+	N-Acetyl-L-glutamic acid	0.0116762	0.867866	0.480189	228.026	886.144	1844.52	2970.36	2808.99	1079.96	2771	4001.4	3215.54	1779.03	2438.63	1841.75	2157.36	1998.97	1973.83	2036.13	2047.27	C00624	HMDB0001138	Mitochondria	Organic acids and derivatives	Carboxylic acids and derivatives	Amino acids, peptides, and analogues	Glutamic acid and derivatives
M188T715	(M-H)-	N-Acetyl-L-glutamate	0.295305	0.463856	0.0709933	188.055	715.033	5702.55	1643.79	2355.32	5003.16	3612.33	858.271	1443.18	854.723	1323.64	1456	790.385	3026.7	1008.25	1011.5	1052.68	C00624	HMDB0001138	Mitochondria	Organic acids and derivatives	Carboxylic acids and derivatives	Amino acids, peptides, and analogues	Glutamic acid and derivatives
M174T727	(M-H)-	N-Acetyl-L-aspartic acid	1.03236	0.545447	0.192347	174.041	727.181	64735.2	41717.4	17714	15665.1	17284.3	11450.8	12151.2	10200.4	28391.8	8406.84	21957.4	10836.6	6503.75	6503.97	6452.73	C01042	HMDB0000812	Cytoplasm;Mitochondria	Organic acids and derivatives	Carboxylic acids and derivatives	Amino acids, peptides, and analogues	Aspartic acid and derivatives
M130T468	(M-H)-	N-Acetyl-L-alanine	0.281846	0.742884	0.278762	130.05	468.168	9089.27	7197.61	4538.08	1508.45	3531.99	5000.74	4342.49	2979.46	5365.38	3188.67	3739.73	3314.24	1840.15	1837.62	1902.19		HMDB0000766	Cytoplasm (predicted from logP);	Organic acids and derivatives	Carboxylic acids and derivatives	Amino acids, peptides, and analogues	N-acyl-L-alpha-amino acids
M380T808	(M-H+2Na)+	N-Acetylglucosaminylasparagine	0.107118	0.689831	0.13471	380.108	808.066	1651.8	1242.31	816.853	529.27	677.535	677.64	672.297	555.889	647.551	757.597	663.645	562.904	733.099	761.683	732.548
M300T825	(M-H)-	N-Acetylglucosamine 1-phosphate	0.974057	1.02582	0.926456	300.048	825.222	57653.3	76010.9	60734	18877.2	42647.7	51636.1	24323.7	90762	85663.9	34680.4	42691.2	37380	16855.9	16875.8	17554	C04256	HMDB0001367	Cytoplasm	Organic oxygen compounds	Organooxygen compounds	Carbohydrates and carbohydrate conjugates	N-acyl-alpha-hexosamines
M190T363_2	(M-H)-	N-Acetyl-DL-methionine	0.183495	0.76673	0.0270827	190.054	362.897	10529.7	11043.4	10309.6	8633.43	10575.2	7893.77	7382.97	8302.77	7370.97	5124.81	10425.5	6618.62	6897.33	7072.62	7065.03
M366T869	(M+H-H2O)+	N-Acetyl-D-lactosamine	0.458325	0.489601	0.0156663	366.139	869.128	6730.63	8116.11	4732.1	4352.03	3158.35	3097.04	1847.97	2527.27	2652.77	1970.05	3936.98	1844.16	2319.62	2255.3	2253.89
M284T892	(M+H-H2O)+	N-Acetyl-D-Glucosamine 6-Phosphate	2.03843	1.70003	0.0482302	284.053	891.706	49510.9	63653.9	32518.9	10236.8	26047.3	47189.5	36636	69189.6	75907	72264.3	41232.7	94344.9	31531.5	32115.1	31530.8	C00357	HMDB0001062	Cytoplasm (predicted from logP)	Organic oxygen compounds	Organooxygen compounds	Carbohydrates and carbohydrate conjugates	Acylaminosugars
M204T518	(M+H-H2O)+	N-Acetyl-D-glucosamine	0.74852	0.516056	0.0557359	204.086	518.037	25794	25220.6	10757.9	7803.31	11537.4	10944.7	6670.28	10368.8	11182	4880.8	8971.36	5433.84	3986.92	3989.35	4227.97	C00140	HMDB0000215	Cytoplasm;Membrane;Lysosome	Organic oxygen compounds	Organooxygen compounds	Carbohydrates and carbohydrate conjugates	Acylaminosugars
M220T473	(M-H)-	N-Acetyl-D-glucosamine	0.489454	0.504695	0.0247692	220.082	473.264	6427.59	7006.64	3052.75	2341	6341.58	7495.28	1969.35	2142.66	5024.57	1622.64	3086.73	2639.83	1197.57	1143.33	1197.93	C00140	HMDB0000215	Cytoplasm;Membrane;Lysosome	Organic oxygen compounds	Organooxygen compounds	Carbohydrates and carbohydrate conjugates	Acylaminosugars
M303T823	(M-H)-	N-Acetylaspartylglutamate (NAAG)	0.326123	1.40231	0.0814975	303.082	823.331	1237.84	1615.12	1081.17	856.194	1209.19	1624.42	1274.32	1067.19	2125.8	1896.92	1693.22	2633.7	1187.84	1233.43	1190.17	C12270	HMDB0001067	Cellular Locations Not Available	Organic acids and derivatives	Carboxylic acids and derivatives	Amino acids, peptides, and analogues	Dipeptides
M282T264	(M+H)+	N6-methyladenosine	1.0874	0.432708	0.000113531	282.119	264.093	18491.3	31381	26035.6	24404.3	23821.7	18462.6	12467.3	5979.91	10454.3	11083.4	11793.7	9924.04	7005	9296.3	7002.83		HMDB0004044	Cellular Locations Not Available	Nucleosides, nucleotides, and analogues	Purine nucleosides		Purine nucleosides
M189T1079	(M+H)+	N6,N6,N6-Trimethyl-L-lysine	0.494843	0.816841	0.80537	189.159	1079.17	54554	11983	3112.68	12815.4	4205.06	4889.95	4083.99	3622.36	50306.6	5118.89	5897.83	5760.42	5652.95	4631.96	4556.18	C03793	HMDB0001325	Cytoplasm;Endoplasmic reticulum	Organic acids and derivatives	Carboxylic acids and derivatives	Amino acids, peptides, and analogues	L-alpha-amino acids
M286T327	(M+H)+	N4-Acetylcytidine	0.311201	0.696142	0.324793	286.102	326.833	4795.14	3693.06	2719.94	10277.1	6463.23	2183.52	2869.31	2764.36	7537.07	2256.84	2306.53	3242.03	1133	1167.76	1168.73		HMDB0005923	Cellular Locations Not Available	Nucleosides, nucleotides, and analogues	Pyrimidine nucleosides		Pyrimidine nucleosides
M312T388	(M+H)+	N2,N2-Dimethylguanosine	0.618849	0.416138	0.00551026	312.128	388.161	8927.75	4302.97	3815.22	9033.68	6622.1	9406.99	2808.83	1103.49	5001.56	1966.88	3823.38	2818.89	1678.29	1663.23	1467.47		HMDB0004824	Cellular Locations Not Available	Nucleosides, nucleotides, and analogues	Purine nucleosides		Purine nucleosides
M407T902	(M+H-H2O)+	N,N'-Diacetylchitobiose	0.10173	0.730878	0.151094	407.165	901.856	1064.16	1893.98	1368.37	902.896	2095.21	841.345	1189.99	854.721	1379.99	867.086	874.957	801.568	822.645	833.378	822.702	C01674	HMDB0003556/HMDB0062702	Cytoplasm (predicted from logP)	Organic oxygen compounds	Organooxygen compounds	Carbohydrates and carbohydrate conjugates	Acylaminosugars
M232T882	(M+CH3CN+H)+	N-(omega)-Hydroxyarginine	0.361158	0.356818	0.382455	232.139	882.209	859.838	668.64	991.661	12906.8	1179.38	572.128	723.497	1261.93	1355.06	1344.37	540.174	904.544	817.631	950.359	820.205	C05933	HMDB0004224	Cellular Locations Not Available	Organic acids and derivatives	Carboxylic acids and derivatives	Amino acids, peptides, and analogues	Arginine and derivatives
M225T76	(M-H)-	Myristoleic acid	1.68945	1.24938	0.222767	225.185	76.045	39938.9	46456.2	113563	54919.9	77707.5	66727.6	102887	79129.7	103256	65833.4	77554.8	70234	56724.8	58416.7	58595.6	C08322	HMDB0002000	Extracellular;Membrane (predicted from logP)	Lipids and lipid-like molecules	Fatty Acyls	Fatty acids and conjugates	Long-chain fatty acids
M227T76	(M-H)-	Myristic acid	4.64757	1.51809	0.00564343	227.201	76.2525	116787	126782	258859	173185	265503	218312	320786	265689	322889	270666	271653	308430	245169	264434	264158	C06424	HMDB0000806	Cytoplasm;Extracellular;Membrane (predicted from logP)	Lipids and lipid-like molecules	Fatty Acyls	Fatty acids and conjugates	Long-chain fatty acids
M227T76	(M-H)-	Myristic acid	4.64757	1.51809	0.00564343	227.201	76.2525	116787	126782	258859	173185	265503	218312	320786	265689	322889	270666	271653	308430	245169	264434	264158	C06424	HMDB0000806	Cytoplasm;Extracellular;Membrane (predicted from logP)	Lipids and lipid-like molecules	Fatty Acyls	Fatty acids and conjugates	Long-chain fatty acids
M179T727	(M-H)-	myo-Inositol	2.09347	0.956964	0.827392	179.056	726.683	325307	470377	242885	160386	230529	224094	255424	286239	384066	182004	208483	266199	144508	144566	146247	C00137	HMDB0000211	Extracellular
M310T445	(M+CH3COO)-	Muramic acid	0.183012	0.553419	0.218632	310.113	445.108	2913.06	442.17	1051.09	1049.92	1162.41	541.748	1044.64	252.609	440.699	503.721	1355.77	365.255	484.408	498.78	484.359
M337T49	(M+H-H2O)+	MG(18:2(9Z,12Z)/0:0/0:0)[rac]	2.09178	1.28401	0.206953	337.273	48.6355	99049.7	134800	79300.5	38750.8	89983.3	87406.4	77413.3	117676	109016	175126	104182	96198.7	124275	130172	124258
M219T916_1	(M-2H+3Na)+	Methyl 4-hydroxybenzoate	0.373707	0.683487	0.140883	219.005	915.629	7624.58	8947.91	7050.85	2744.09	5407.17	4572.77	3675.56	2658.17	6852.05	2120.5	6012.16	3524.53	2248.39	2249.31	2310.07
M522T854	(M+NH4)+	Maltotriose	0.0839742	0.911504	0.742236	522.201	853.666	780	1662.29	932.379	1213.74	901.917	672.735	551.149	932.07	856.514	488.436	785.417	2004.07	456.872	468.684	457.175	C01835	HMDB0001262	Cytoplasm;Extracellular;Lysosome	Organic oxygen compounds	Organooxygen compounds	Carbohydrates and carbohydrate conjugates	Oligosaccharides
M846T1022	(M+NH4)+	Maltopentaose	0.0643394	0.799025	0.134703	846.306	1022.18	491.939	607.601	743.002	450.636	518.457	775.304	355.715	544.165	649.177	349.07	427.679	540.248	257.389	263.004	257.433		HMDB0012254	Cellular Locations Not Available	Organic oxygen compounds	Organooxygen compounds	Carbohydrates and carbohydrate conjugates	Oligosaccharides
M325T760	(M-H2O-H)-	Maltitol	0.488125	0.563778	0.0823999	325.113	760.492	9323.78	11579	8878.16	4330.61	4034.14	3372.46	4525.06	5644.38	4873.88	1653.25	4839.05	1871.37	2520.97	2878.24	2886.65
M115T742	(M-H)-	Maleic acid	0.991714	0.675408	0.182759	115.003	742.132	77322	70420.2	38103.7	18474.6	39786	28606	33239.9	23606	48014.1	21495.7	29830.8	28005.8	14563.1	14154.2	14558.9	C01384	HMDB0000176	Cytoplasm;Extracellular;Membrane	Organic acids and derivatives	Carboxylic acids and derivatives	Dicarboxylic acids and derivatives	Dicarboxylic acids and derivatives
M511T377	(M+H)+	Lyso-PAF C-18	0.714186	0.617161	0.280717	511.393	376.675	29869.4	41570.3	13792.5	7294.95	13268.7	3473.44	13239.9	16612.5	8683.31	7714.96	12448.6	8737.43	11414.7	11693	11690.3
M243T110	(M+H)+	Lumichrome	0.489695	0.610561	0.0462901	243.087	110.462	9162.21	9911.81	8837.35	8507.2	5526.84	4923.61	2874.54	2288.34	7252.66	4334.29	8537.85	3328.7	4611.59	4580.38	4665.13	C01727
M182T599	(M+H)+	L-Tyrosine	1.20094	0.537642	0.0635306	182.081	599.027	70280.9	74636.2	34990.7	26302.1	30850.5	27203.8	19282.2	14219.6	34120.6	17168.1	34571	22718	10690.4	11268.3	11267.3	C00082	HMDB0000158	Cytoplasm;Extracellular;Mitochondria
M180T545	(M-H)-	L-Tyrosine	0.569361	0.73633	0.112027	180.066	545.084	40882	48331.7	54419.9	37754.7	55444.6	37407.4	21966.5	24832.5	52961.6	29724.4	51813.5	20633	19026.1	20028.2	20045.3	C00082	HMDB0000158	Cytoplasm;Extracellular;Mitochondria
M203T458	(M-H)-	L-Tryptophan	0.881357	0.526362	0.0877342	203.082	458.433	35919.8	36556.4	13209	11567.4	14114.7	11629.7	9281.75	12265.5	14411	6529.87	12846.7	9406.14	5099.05	4509.86	5100.47	C00078	HMDB0000929	Extracellular	Organoheterocyclic compounds	Indoles and derivatives	Indolyl carboxylic acids and derivatives	Indolyl carboxylic acids and derivatives
M205T516	(M+H)+	L-Tryptophan	0.83917	0.415361	0.0942834	205.096	515.725	38773.5	36749.1	9943.75	10529.4	9617.73	7928.81	7973.04	7646.91	7816.14	7630.07	9492.29	6602.59	7958.89	7957.93	7814.98	C00078	HMDB0000929	Extracellular	Organoheterocyclic compounds	Indoles and derivatives	Indolyl carboxylic acids and derivatives	Indolyl carboxylic acids and derivatives
M118T709	(M-H)-	L-Threonine	0.293631	0.633215	0.285325	118.05	708.69	8533.62	18962.7	1386.66	4656.39	5742.73	6674.55	3696.21	6278.84	5435.43	4937.57	4607.95	4144.45	3039.9	3519.09	3523.69	C00188	HMDB0000167	Cytoplasm;Extracellular
M135T611	(M-H)-	L-Threonate	1.3331	0.54791	0.0338375	135.029	610.742	50874.8	82542.5	27673	65409.3	50015.8	26139.7	36341.9	28657.7	27627.9	15983.7	30275.8	26940.7	10539.1	11182.8	11495	C01620	HMDB0000943/HMDB0062620	Cytoplasm (predicted from logP)	Organic oxygen compounds	Organooxygen compounds	Carbohydrates and carbohydrate conjugates	Sugar acids and derivatives
M135T611	(M-H)-	L-Threonate	1.3331	0.54791	0.0338375	135.029	610.742	50874.8	82542.5	27673	65409.3	50015.8	26139.7	36341.9	28657.7	27627.9	15983.7	30275.8	26940.7	10539.1	11182.8	11495	C01620	HMDB0000943/HMDB0062620	Cytoplasm (predicted from logP)	Organic oxygen compounds	Organooxygen compounds	Carbohydrates and carbohydrate conjugates	Sugar acids and derivatives
M277T896	(M+H)+	L-Saccharopine	1.44678	0.764174	0.296442	277.139	895.73	125589	179019	103595	57022.5	76606.6	66928.3	102212	90733.3	107478	55251.5	71380.6	38143.1	43224	45684.5	45677.3	C00449	HMDB0000279/HMDB0062698	Mitochondria	Organic acids and derivatives	Carboxylic acids and derivatives	Amino acids, peptides, and analogues	Glutamic acid and derivatives
M275T836	(M-H)-	L-Saccharopine	0.529663	0.723613	0.279049	275.124	835.718	17303.8	26139.4	13627.6	5533.77	10491.6	9815.09	11845.4	12911.9	14457.4	6350.11	9836.83	4593.95	5412.46	5701.04	5414.59	C00449	HMDB0000279/HMDB0062698	Mitochondria	Organic acids and derivatives	Carboxylic acids and derivatives	Amino acids, peptides, and analogues	Glutamic acid and derivatives
M128T731	(M-H)-	L-Pyroglutamic acid	1.10872	0.727248	0.26171	128.035	731.227	105033	121022	61305.8	31328.4	63350.5	45697.2	48666.9	38557.9	85622.7	31008	64134.7	43080.2	22035.4	23945	23954.9	C01879	HMDB0000267/HMDB0000805/HMDB0060262	Cytoplasm (predicted from logP)	Organic acids and derivatives	Carboxylic acids and derivatives	Amino acids, peptides, and analogues	Alpha amino acids and derivatives
M130T792	(M+H)+	L-Pyroglutamic acid	0.60453	0.809915	0.262748	130.049	791.549	83765.6	74579.3	45350.7	37242	49810.9	43791.5	41143.8	33372.4	57272.5	33162.4	58273.3	47724.4	26261	26250.9	26697.9	C01879	HMDB0000267/HMDB0000805/HMDB0060262	Cytoplasm (predicted from logP)	Organic acids and derivatives	Carboxylic acids and derivatives	Amino acids, peptides, and analogues	Alpha amino acids and derivatives
M114T570	(M-H)-	L-Proline	0.702116	0.740354	0.272274	114.055	570.459	80067.9	50607.7	51849.1	24546	45977.7	23350	34144.3	20905.4	59896.3	23415.4	28981.2	37290.1	15888.6	11058.4	17454.1	C00148	HMDB0000162	Cytoplasm;Extracellular;Mitochondria;Lysosome;Endoplasmic reticulum	Organic acids and derivatives	Carboxylic acids and derivatives	Amino acids, peptides, and analogues	Proline and derivatives
M164T456	(M-H)-	L-Phenylalanine	2.92387	0.44022	0.0476458	164.071	456.106	244459	307816	117151	105594	103067	82866.9	68128.8	51951.4	121755	34932.4	81176.2	65087.6	28491.4	25984.8	26080.2	C00079	HMDB0000159	Cytoplasm;Extracellular;Mitochondria	Organic acids and derivatives	Carboxylic acids and derivatives	Amino acids, peptides, and analogues	Phenylalanine and derivatives
M164T456	(M-H)-	L-Phenylalanine	2.92387	0.44022	0.0476458	164.071	456.106	244459	307816	117151	105594	103067	82866.9	68128.8	51951.4	121755	34932.4	81176.2	65087.6	28491.4	25984.8	26080.2	C00079	HMDB0000159	Cytoplasm;Extracellular;Mitochondria	Organic acids and derivatives	Carboxylic acids and derivatives	Amino acids, peptides, and analogues	Phenylalanine and derivatives
M166T522	(M+H)+	L-Phenylalanine	2.17671	0.436946	0.00786367	166.085	522.253	150751	150267	61272.6	95132.8	149430	59934.7	38461.9	41536.9	72774.4	45169.7	50334.8	43073.1	27887.7	27838.9	27613.4	C00079	HMDB0000159	Cytoplasm;Extracellular;Mitochondria	Organic acids and derivatives	Carboxylic acids and derivatives	Amino acids, peptides, and analogues	Phenylalanine and derivatives
M400T338	(M+H)+	L-Palmitoylcarnitine	0.292116	1.01076	0.976467	400.341	338.157	60353.5	69721.2	73818.4	17801	21513.5	89005.4	40618	50089.4	131907	47548	22875.3	42750	43749.9	40907.3	40830	C02990	HMDB0000222	Cytoplasm;Extracellular;Membrane;Mitochondria	Lipids and lipid-like molecules	Fatty Acyls	Fatty acid esters	Acyl carnitines
M130T491	(M-H)-	L-Norleucine	3.45475	0.433628	0.0891604	130.087	490.63	468411	384586	164789	120070	151443	72785.7	91026.2	52696.7	170530	56474.3	146507	73403.9	34615.4	36776.6	36732.1	C01933	HMDB0001645	Cellular Locations Not Available	Organic acids and derivatives	Carboxylic acids and derivatives	Amino acids, peptides, and analogues	L-alpha-amino acids
M130T491	(M-H)-	L-Norleucine	3.45475	0.433628	0.0891604	130.087	490.63	468411	384586	164789	120070	151443	72785.7	91026.2	52696.7	170530	56474.3	146507	73403.9	34615.4	36776.6	36732.1	C01933	HMDB0001645	Cellular Locations Not Available	Organic acids and derivatives	Carboxylic acids and derivatives	Amino acids, peptides, and analogues	L-alpha-amino acids
M189T1085	(M+H)+	L-NG-Monomethylarginine	0.146864	0.750758	0.130638	189.135	1084.77	7677.49	5152.66	4534.43	2861.48	3371.66	5568.04	4570.07	3376.71	3654.65	3125.42	3273.34	3896.25	2469.27	2723.07	2469.99
M148T510	(M-H)-	L-Methionine	1.26696	0.411049	0.115286	148.043	510.253	25719.4	83338.9	34412.8	9417.58	29687.2	13634.4	7181.18	18653.9	23775	9480.36	12680.9	8880.67	5622.75	7036.66	7020.05	C00073	HMDB0000696	Extracellular	Organic acids and derivatives	Carboxylic acids and derivatives	Amino acids, peptides, and analogues	Methionine and derivatives
M150T573	(M+H)+	L-Methionine	0.695004	0.537856	0.235718	150.057	572.975	38795.3	11855.5	6595.22	17957.4	11021.4	4908.4	6522.29	3167.66	15325.9	3414.07	15044.7	5541.83	4749.3	6019.59	4760.64	C00073	HMDB0000696	Extracellular	Organic acids and derivatives	Carboxylic acids and derivatives	Amino acids, peptides, and analogues	Methionine and derivatives
M133T742	(M-H)-	L-Malic acid	2.21617	0.67884	0.216982	133.014	742.297	395850	371498	190176	92557.6	205143	124843	175075	116976	254651	105183	138553	146407	76717.9	76538.9	79346.3	C00149	HMDB0000156	Cytoplasm	Organic acids and derivatives	Hydroxy acids and derivatives	Beta hydroxy acids and derivatives	Beta hydroxy acids and derivatives
M145T1020	(M-H)-	L-Lysine	0.585241	0.825639	0.771445	145.098	1019.97	23055.1	68774.5	10708.8	10103.6	21073.9	13157.6	11546.2	7739.27	74769	5687.88	15090.4	6431.54	2143.17	1395.51	3220.89	C00047	HMDB0000182	Cytoplasm;Extracellular;Mitochondria;Nucleus;Peroxisome	Organic acids and derivatives	Carboxylic acids and derivatives	Amino acids, peptides, and analogues	L-alpha-amino acids
M132T527	(M+H)+	L-Leucine	1.60203	0.536265	0.0554743	132.101	526.643	134031	154549	71875.6	57604.9	61043.8	50496.1	35881.9	35139.8	67620.3	38904.6	55479.2	50980.3	23418.3	23809.1	23419.4	C00123	HMDB0000687	Extracellular;Mitochondria	Organic acids and derivatives	Carboxylic acids and derivatives	Amino acids, peptides, and analogues	Leucine and derivatives
M209T521	(M+H)+	L-Kynurenine	0.793428	0.377171	0.0855386	209.091	520.907	20711.5	31291.3	9787.75	5805.91	7130.41	5222.76	5319.92	5796.6	7323.38	3682.43	5963.96	2068.35	3958.53	4181.53	3944.6	C00328	HMDB0000684	Cytoplasm (predicted from logP)	Organic oxygen compounds	Organooxygen compounds	Carbonyl compounds	Alkyl-phenylketones
M207T464	(M-H)-	L-Kynurenine	0.196277	0.902935	0.801031	207.077	464.334	4242.27	4491.29	1839.43	1412.37	858.261	1371.39	4645.81	2086.85	3112.01	1117.58	813.917	1059.06	921.933	853.555	916.46	C00328	HMDB0000684	Cytoplasm (predicted from logP)	Organic oxygen compounds	Organooxygen compounds	Carbonyl compounds	Alkyl-phenylketones
M132T550	(M+H)+	L-Isoleucine	1.28706	0.563924	0.0241867	132.101	549.875	81568	58186.5	55695.3	40751.2	40396.1	30349.6	21491.2	20008.3	45504.5	25210	34986.3	25894.5	15451.4	15379.2	17704.3	C00407	HMDB0000172	Cytoplasm;Extracellular;Mitochondria	Organic acids and derivatives	Carboxylic acids and derivatives	Amino acids, peptides, and analogues	Isoleucine and derivatives
M279T74_2	(M-H)-	Linoleic acid	16.627	1.70623	0.0168465	279.233	73.543	1.84141e+06	2.37851e+06	2.22125e+06	639035	1.81741e+06	1.73676e+06	2.47544e+06	3.48852e+06	2.44462e+06	4.29232e+06	1.93886e+06	3.50494e+06	2.59875e+06	2.60178e+06	2.66485e+06	C01595	HMDB0000673	Cytoplasm;Extracellular;Membrane (predicted from logP)	Lipids and lipid-like molecules	Fatty Acyls	Lineolic acids and derivatives	Lineolic acids and derivatives
M279T74_2	(M-H)-	Linoleic acid	16.627	1.70623	0.0168465	279.233	73.543	1.84141e+06	2.37851e+06	2.22125e+06	639035	1.81741e+06	1.73676e+06	2.47544e+06	3.48852e+06	2.44462e+06	4.29232e+06	1.93886e+06	3.50494e+06	2.59875e+06	2.60178e+06	2.66485e+06	C01595	HMDB0000673	Cytoplasm;Extracellular;Membrane (predicted from logP)	Lipids and lipid-like molecules	Fatty Acyls	Lineolic acids and derivatives	Lineolic acids and derivatives
M241T687	(M+CH3COO)-	L-Iditol	1.68141	0.332107	0.0527484	241.092	686.613	55458.5	88059.6	32830.3	13414	25172	19362.3	14239.9	22259.7	20378.3	7087.16	10901.5	2944.86	3819.46	3932.39	3928.55	C01507	HMDB0011632	Extracellular;Membrane	Organic oxygen compounds	Organooxygen compounds	Carbohydrates and carbohydrate conjugates	Sugar alcohols
M241T687	(M+CH3COO)-	L-Iditol	1.68141	0.332107	0.0527484	241.092	686.613	55458.5	88059.6	32830.3	13414	25172	19362.3	14239.9	22259.7	20378.3	7087.16	10901.5	2944.86	3819.46	3932.39	3928.55	C01507	HMDB0011632	Extracellular;Membrane	Organic oxygen compounds	Organooxygen compounds	Carbohydrates and carbohydrate conjugates	Sugar alcohols
M199T368	(M+NH4-2H)-	L-homocysteic acid	0.0417774	0.856789	0.467984	199.037	368.29	3982.79	2648.06	2718.7	2581.6	2684.55	2152.69	1605.6	969.981	4274.6	2959.3	2242.99	2314.5	1547.74	1806.6	1561.3	C16511	HMDB0002205	Cellular Locations Not Available	Organic acids and derivatives	Carboxylic acids and derivatives	Amino acids, peptides, and analogues	L-alpha-amino acids
M156T832	(M+H)+	L-Histidine	0.334636	1.18847	0.561372	156.076	831.541	37122.3	19463.5	20719.6	19093	24516.1	19811.8	30650.7	14808.4	59573.3	15934.1	25373.7	20908.4	18004.8	17977.7	16739.8	C00135	HMDB0000177	Cytoplasm;Extracellular	Organic acids and derivatives	Carboxylic acids and derivatives	Amino acids, peptides, and analogues	Histidine and derivatives
M147T745	(M+H)+	L-Glutamine	0.518191	1.15774	0.478243	147.075	744.856	50023.4	34445.6	64869.3	21484.6	57781.8	47482.6	60029.7	40000.7	78541.9	25639.7	58429.1	56995	46632.5	47236.5	47236.1	C00064	HMDB0000641	Extracellular;Mitochondria	Organic acids and derivatives	Carboxylic acids and derivatives	Amino acids, peptides, and analogues	L-alpha-amino acids
M146T731	(M-H)-	L-Glutamate	2.86401	0.719001	0.257288	146.045	731.227	683178	811413	402054	198751	397726	308517	313604	241657	555382	197774	420772	285194	133734	135858	139044	C00025	HMDB0000148	Extracellular;Mitochondria;Lysosome;Endoplasmic reticulum	Organic acids and derivatives	Carboxylic acids and derivatives	Amino acids, peptides, and analogues	Glutamic acid and derivatives
M148T792_2	(M+H)+	L-Glutamate	1.09089	0.758432	0.154606	148.06	791.54	178959	177351	107699	86599.2	109833	93738	75560.3	74522.5	122798	71523.2	123964	103625	53477.4	55432.7	55426.9	C00025	HMDB0000148	Extracellular;Mitochondria;Lysosome;Endoplasmic reticulum	Organic acids and derivatives	Carboxylic acids and derivatives	Amino acids, peptides, and analogues	Glutamic acid and derivatives
M243T825	(M-H)-	L-Fucose-1-phosphate	0.173472	0.790569	0.433605	243.027	824.84	2694.34	8041.63	3007.89	1389.91	3523.96	3450.22	2928.01	3009.55	3329.78	2966.21	3221.24	2023.06	1963.59	1907.88	1908.59	C02985	HMDB0001265/HMDB0062489	Cytoplasm	Organic oxygen compounds	Organooxygen compounds	Carbohydrates and carbohydrate conjugates	Monosaccharide phosphates
M206T390	(M+Na)+	Levonordefrin	0.19616	0.885395	0.759	206.083	389.841	4695.47	2133.85	2726.79	12898.3	3745.8	3056.46	3042.66	5150.71	6850.45	4724.63	3803.77	2331.54	2670.12	2456.51	2423.87
M157T530	(M-H)-	L-dihydroorotate	0.771267	0.703858	0.534703	157.025	530.091	56049.9	38377.6	7095.36	4260.52	9846.9	9087.51	10886.7	31815.4	20793.4	9295.51	8514.96	6477.58	8526.17	8666.86	9160	C00337	HMDB0000528/HMDB0003349	Cytoplasm;Cytoplasm (predicted from logP)	Organic acids and derivatives	Carboxylic acids and derivatives	Amino acids, peptides, and analogues	Alpha amino acids and derivatives
M241T873	(M+H)+	L-Cystine	0.302107	1.22167	0.37683	241.03	873.091	4480.42	5129.77	4964.98	3007.63	3266.59	3971.31	2982.83	6005.1	7353.36	2798.78	3411.92	7770.74	2619.47	2642.55	2642.58	C00491	HMDB0000192	Cytoplasm;Extracellular	Organic acids and derivatives	Carboxylic acids and derivatives	Amino acids, peptides, and analogues	L-cysteine-S-conjugates
M176T786	(M+H)+	L-Citrulline	0.198529	0.834525	0.343923	176.102	786.423	1578.83	4913.71	4689.87	3989.98	3368.22	4951.73	1426.57	3920.25	3506.73	3276.69	3663.1	3811.6	2292.16	2298.88	2718.95	C00327	HMDB0000904	Mitochondria	Organic acids and derivatives	Carboxylic acids and derivatives	Amino acids, peptides, and analogues	L-alpha-amino acids
M174T719	(M-H)-	L-Citrulline	0.160662	0.986357	0.964699	174.088	718.789	4387.58	4999.29	1007.59	1468.23	2589.08	3522.76	3704.57	1519.14	4251.41	1341.07	2000.07	4913.05	1469.61	1495.58	1590.69	C00327	HMDB0000904	Mitochondria	Organic acids and derivatives	Carboxylic acids and derivatives	Amino acids, peptides, and analogues	L-alpha-amino acids
M227T839	(M+H)+	L-Carnosine	0.0976178	0.871994	0.558891	227.113	839.106	60957.2	44083.9	54012.5	11652.7	30692.5	55336.3	26257.1	24050.5	42009	31264.2	54878.4	45412.3	16167.2	10937.5	16025.1	C00386	HMDB0000033	Cytoplasm	Organic acids and derivatives	Peptidomimetics	Hybrid peptides	Hybrid peptides
M162T700	(M+H)+	L-Carnitine	5.70264	0.609523	0.0357936	162.112	700.422	1.2046e+06	1.12861e+06	1.0276e+06	561078	804288	672301	777292	540250	681347	352045	762846	176721	472529	472489	463684	C00318	HMDB0000062	Cytoplasm;Extracellular;Mitochondria;Endoplasmic reticulum;Peroxisome	Organic nitrogen compounds	Organonitrogen compounds	Quaternary ammonium salts	Carnitines
M220T645	(M+CH3COO)-	L-Carnitine	1.57355	0.614151	0.0828368	220.119	645.14	105232	103835	94399.9	39865.8	70629.8	48379.6	76669.8	42729.6	63077.6	30064.2	62014.4	9392.65	35742	35748.1	34127.3	C00318	HMDB0000062	Cytoplasm;Extracellular;Mitochondria;Endoplasmic reticulum;Peroxisome	Organic nitrogen compounds	Organonitrogen compounds	Quaternary ammonium salts	Carnitines
M220T645	(M+CH3COO)-	L-Carnitine	1.57355	0.614151	0.0828368	220.119	645.14	105232	103835	94399.9	39865.8	70629.8	48379.6	76669.8	42729.6	63077.6	30064.2	62014.4	9392.65	35742	35748.1	34127.3	C00318	HMDB0000062	Cytoplasm;Extracellular;Mitochondria;Endoplasmic reticulum;Peroxisome	Organic nitrogen compounds	Organonitrogen compounds	Quaternary ammonium salts	Carnitines
M132T771_2	(M-H)-	L-Aspartate	1.03543	0.870934	0.624277	132.03	771.072	111735	181277	122501	46431.9	116442	92806.1	121851	94002.6	185156	66368.2	94703.4	22484.2	47667.7	49855.5	49849.8	C00049	HMDB0000191	Cytoplasm;Extracellular;Mitochondria	Organic acids and derivatives	Carboxylic acids and derivatives	Amino acids, peptides, and analogues	Aspartic acid and derivatives
M134T802	(M+H)+	L-Aspartate	0.555595	0.741859	0.358307	134.044	802.216	29906.9	25176.8	15323.1	5746.25	12483.9	8327.11	9332.07	8309.26	18709.2	8410.42	17132.7	10040	5633.15	5377.02	5378.91	C00049	HMDB0000191	Cytoplasm;Extracellular;Mitochondria	Organic acids and derivatives	Carboxylic acids and derivatives	Amino acids, peptides, and analogues	Aspartic acid and derivatives
M131T690	(M-H)-	L-Asparagine	0.42319	0.739951	0.36326	131.046	689.759	22706.6	15576.4	13071.9	3735.1	14653.6	5327.88	8228.96	3658.65	16079.8	5393.34	12214.9	9973.68	3611.23	3782.9	3776.41	C00152	HMDB0000168	Cytoplasm;Extracellular;Mitochondria
M133T753	(M+H)+	L-Asparagine	0.147787	0.816833	0.516864	133.06	753.418	5044.85	2934.34	2497.91	1433.1	960.997	1981.54	1772.32	1013.69	2839.43	1348.01	3027.74	2131.01	1113.21	1105.64	865.384	C00152	HMDB0000168	Cytoplasm;Extracellular;Mitochondria
M127T938	(M+H)+	Larixinic Acid	0.503666	0.739448	0.247018	127.038	937.597	22053.2	25427.3	19954	4478.77	16169	12731.5	12020.2	8774.28	19231.1	7286.45	15912.9	11321.6	6872.09	6872.19	6991.02
M175T1053	(M+H)+	L-Arginine	1.59269	0.546804	0.0906448	175.118	1053.1	76444.3	232478	95506.3	209865	118847	92840.3	77444.2	47769	116651	51862.2	15062.8	142860	45760.6	45778.6	41855.6	C00062	HMDB0000517	Cytoplasm;Extracellular;Mitochondria	Organic acids and derivatives	Carboxylic acids and derivatives	Amino acids, peptides, and analogues	L-alpha-amino acids
M239T766	(M-H)-	L-Anserine	0.349853	1.03662	0.930073	239.114	765.756	4055.59	15415.2	13893.2	2878	4111.41	9834.06	3046.81	4038.12	5063.01	7807.63	19435.1	12634.7	2810.25	3250.04	2796.82	C01262	HMDB0000194	Cytoplasm	Organic acids and derivatives	Peptidomimetics	Hybrid peptides	Hybrid peptides
M241T830	(M+H)+	L-Anserine	0.217425	1.06983	0.860099	241.129	830.359	49211.3	47025	50774.2	9766.25	20587.6	27985.3	19973	9223.6	31390.5	18825.9	78373.4	61903.5	12745.1	13367.1	13370.9	C01262	HMDB0000194	Cytoplasm	Organic acids and derivatives	Peptidomimetics	Hybrid peptides	Hybrid peptides
M190T403	(M+H)+	Kynurenic acid	2.26866	0.378	0.00308751	190.049	402.74	110182	85163.5	71238.3	93536.4	59147.6	58991.4	735.833	32842.3	68836.3	23685.8	41711.6	12969.9	579.413	612.429	610.356	C01717	HMDB0000715	Cytoplasm	Organoheterocyclic compounds	Quinolines and derivatives	Quinoline carboxylic acids	Quinoline carboxylic acids
M188T356	(M-H)-	Kynurenic acid	1.77502	0.444014	0.0197727	188.035	356.259	95823.1	45299.8	48880.4	44883.7	48012.4	36803.1	24930.6	14501.1	43345.9	13490.4	40016.4	5667.89	19939	19968.1	21244.7	C01717	HMDB0000715	Cytoplasm	Organoheterocyclic compounds	Quinolines and derivatives	Quinoline carboxylic acids	Quinoline carboxylic acids
M188T356	(M-H)-	Kynurenic acid	1.77502	0.444014	0.0197727	188.035	356.259	95823.1	45299.8	48880.4	44883.7	48012.4	36803.1	24930.6	14501.1	43345.9	13490.4	40016.4	5667.89	19939	19968.1	21244.7	C01717	HMDB0000715	Cytoplasm	Organoheterocyclic compounds	Quinolines and derivatives	Quinoline carboxylic acids	Quinoline carboxylic acids
M158T362	(M-H)-	Isovalerylglycine	1.36169	0.22067	0.0677942	158.082	362.428	35972.3	7523.46	5718.16	52967.2	23618.9	3310.64	4992.23	3392.01	9323.33	1540.87	4735.73	4506.6	1729.88	1699.6	1734.05		HMDB0000678	Cellular Locations Not Available	Organic acids and derivatives	Carboxylic acids and derivatives	Amino acids, peptides, and analogues	N-acyl-alpha amino acids
M158T362	(M-H)-	Isovalerylglycine	1.36169	0.22067	0.0677942	158.082	362.428	35972.3	7523.46	5718.16	52967.2	23618.9	3310.64	4992.23	3392.01	9323.33	1540.87	4735.73	4506.6	1729.88	1699.6	1734.05		HMDB0000678	Cellular Locations Not Available	Organic acids and derivatives	Carboxylic acids and derivatives	Amino acids, peptides, and analogues	N-acyl-alpha amino acids
M144T394	(M-H)-	Isobutyrylglycine	0.835381	0.232892	0.0543094	144.066	393.707	17698.9	3371.37	2326.97	17613.6	10239.2	1690.1	1991.11	1898.7	4516.16	611.589	1530.18	1781.62	807.701	804.547	861.588		HMDB0000730	Cytoplasm (predicted from logP);	Organic acids and derivatives	Carboxylic acids and derivatives	Amino acids, peptides, and analogues	N-acyl-alpha amino acids
M329T812	(M-H2O-H)-	Inosine 5'-monophosphate (IMP)	0.107804	0.904182	0.691894	329.025	812.251	5086.56	2441.09	2871.07	2661.8	6216.04	2257.64	4354.19	4088.28	2837.81	3391.59	3839.72	959.25	2626.66	1951.96	2623.35	C00130	HMDB0000175	Cytoplasm;Extracellular;Mitochondria	Nucleosides, nucleotides, and analogues	Purine nucleotides	Purine ribonucleotides	Purine ribonucleoside monophosphates
M267T412	(M-H)-	Inosine	5.51629	0.566939	0.178922	267.073	411.757	1.10961e+06	1.90601e+06	873496	87137.8	663952	676611	631838	837303	324077	383950	646318	190827	368907	307225	387719	C00294	HMDB0000195	Cytoplasm;Extracellular;Mitochondria;Lysosome	Nucleosides, nucleotides, and analogues	Purine nucleosides		Purine nucleosides
M269T435	(M+H)+	Inosine	3.62321	0.526116	0.0658308	269.088	434.968	473913	659730	289902	178626	237814	248310	202000	247195	246908	125013	203475	74094.9	127158	127169	128071	C00294	HMDB0000195	Cytoplasm;Extracellular;Mitochondria;Lysosome	Nucleosides, nucleotides, and analogues	Purine nucleosides		Purine nucleosides
M212T42_1	(M-H)-	Indoxyl sulfate	6.0437	0.771813	0.542348	212.002	41.737	2.51556e+06	1.58621e+06	1.06396e+06	3.71878e+06	2.50328e+06	469826	954222	1.40985e+06	4.10219e+06	462809	1.00059e+06	1.22219e+06	306831	306778	315570		HMDB0000682	Cytoplasm;	Organic acids and derivatives	Organic sulfuric acids and derivatives	Arylsulfates	Arylsulfates
M204T236	(M-H)-	Indolelactic acid	2.13563	0.255354	0.0789407	204.066	235.815	63157.3	15541.8	26985.8	146493	68224.4	9597.75	19312.9	18726.1	15589.4	5115.1	12548.4	12974.8	5957.6	5916.23	4103.2	C02043	HMDB0000671	Cellular Locations Not Available	Organoheterocyclic compounds	Indoles and derivatives	Indolyl carboxylic acids and derivatives	Indolyl carboxylic acids and derivatives
M204T236	(M-H)-	Indolelactic acid	2.13563	0.255354	0.0789407	204.066	235.815	63157.3	15541.8	26985.8	146493	68224.4	9597.75	19312.9	18726.1	15589.4	5115.1	12548.4	12974.8	5957.6	5916.23	4103.2	C02043	HMDB0000671	Cellular Locations Not Available	Organoheterocyclic compounds	Indoles and derivatives	Indolyl carboxylic acids and derivatives	Indolyl carboxylic acids and derivatives
M160T169	(M-H)-	Indole-3-carboxylic acid	0.698946	0.25174	0.167737	160.04	168.7	27697.6	4723.67	2902.14	2534.75	9612.32	1639.65	1636.01	1926.79	4995.94	722.718	1406.94	1674.59	862.978	1036.16	879.387	C19837	HMDB0003320	Cellular Locations Not Available	Organoheterocyclic compounds	Indoles and derivatives	Indolecarboxylic acids and derivatives	Indolecarboxylic acids and derivatives
M137T435	(M+H)+	Hypoxanthine	7.03455	0.440919	0.0337265	137.045	435.016	1.17826e+06	1.77997e+06	827833	570519	718762	667549	610240	154957	742541	114647	656908	252857	400996	397085	400975	C00262	HMDB0000157	Cytoplasm;Extracellular;Lysosome;Peroxisome	Organoheterocyclic compounds	Imidazopyrimidines	Purines and purine derivatives	Hypoxanthines
M135T334	(M-H)-	Hypoxanthine	1.26736	0.822993	0.356546	135.031	334.122	306052	387686	404111	125893	373060	367411	346381	220099	334642	172096	397083	146233	235339	230388	253790	C00262	HMDB0000157	Cytoplasm;Extracellular;Lysosome;Peroxisome	Organoheterocyclic compounds	Imidazopyrimidines	Purines and purine derivatives	Hypoxanthines
M108T628	(M-H)-	Hypotaurine	1.86105	0.426218	0.095722	108.012	628.42	127309	97118.8	43922.5	17724.8	45860.7	26406.4	44478.8	24019.8	29108.5	12687.5	37899	4538.19	19955.7	21066.1	21001.3	C00519	HMDB0000965	Cytoplasm (predicted from logP)	Organic acids and derivatives	Sulfinic acids and derivatives	Sulfinic acids	Sulfinic acids
M108T628	(M-H)-	Hypotaurine	1.86105	0.426218	0.095722	108.012	628.42	127309	97118.8	43922.5	17724.8	45860.7	26406.4	44478.8	24019.8	29108.5	12687.5	37899	4538.19	19955.7	21066.1	21001.3	C00519	HMDB0000965	Cytoplasm (predicted from logP)	Organic acids and derivatives	Sulfinic acids and derivatives	Sulfinic acids	Sulfinic acids
M181T361	(M-H)-	Hydroxyphenyllactic acid	1.34584	0.354725	0.00314714	181.05	361.105	34269.1	24159.3	17945.2	26819.8	24274.2	10010.9	12113.5	7268.09	13188.4	3186.24	10305.3	2705.54	5511.36	5511.49	5668.28	C03672	HMDB0000755	Mitochondria	Phenylpropanoids and polyketides	Phenylpropanoic acids		Phenylpropanoic acids
M181T361	(M-H)-	Hydroxyphenyllactic acid	1.34584	0.354725	0.00314714	181.05	361.105	34269.1	24159.3	17945.2	26819.8	24274.2	10010.9	12113.5	7268.09	13188.4	3186.24	10305.3	2705.54	5511.36	5511.49	5668.28	C03672	HMDB0000755	Mitochondria	Phenylpropanoids and polyketides	Phenylpropanoic acids		Phenylpropanoic acids
M131T205	(M-H)-	Hydroxyisocaproic acid	6.85077	0.502024	0.014632	131.071	205.335	1.33732e+06	673760	681229	1.14504e+06	1.07748e+06	571736	667768	377649	688689	219805	575283	225193	242538	244301	260715	C03264	HMDB0000624	Extracellular;Membrane	Lipids and lipid-like molecules	Fatty Acyls	Fatty acids and conjugates	Hydroxy fatty acids
M131T205	(M-H)-	Hydroxyisocaproic acid	6.85077	0.502024	0.014632	131.071	205.335	1.33732e+06	673760	681229	1.14504e+06	1.07748e+06	571736	667768	377649	688689	219805	575283	225193	242538	244301	260715	C03264	HMDB0000624	Extracellular;Membrane	Lipids and lipid-like molecules	Fatty Acyls	Fatty acids and conjugates	Hydroxy fatty acids
M205T844	(M-H)-	Homocitrate	0.260323	0.594208	0.182123	205.035	843.909	3467.13	4059.82	1206.21	6012.22	2279.35	886.751	1102.17	1390.65	2636.73	1952.1	937.793	2623.71	832.948	895.838	797.605	C01251	HMDB0003518	Cytoplasm (predicted from logP)	Organic acids and derivatives	Carboxylic acids and derivatives	Tricarboxylic acids and derivatives	Tricarboxylic acids and derivatives
M112T797	(M+H)+	Histamine	0.534709	1.63495	0.472021	112.086	797.014	5859.9	5790.9	3430.87	3262.99	2191.83	4072.34	1676.44	1521.44	5223.29	3528.33	4697.96	23586.7	6200.54	4757.61	4597.77	C00388	HMDB0000870/HMDB0060263	Extracellular	Organic nitrogen compounds	Organonitrogen compounds	Amines	2-arylethylamines
M235T286	(M+H-H2O)+	His-Pro	0.477666	0.521731	0.0836294	235.119	285.887	5915.58	5294.95	3011.47	9251.52	9628.62	2126.65	4030.66	1679.88	5797.17	972.018	3751.91	2148.3	1765.89	1917.07	1917.66
M285T825	(M+H)+	His-Glu	0.168435	0.770074	0.399264	285.119	824.569	4678.05	2214.04	997.707	2983.67	2438.79	1518.65	1672.67	1376.28	2331.57	968.433	3543.95	1528	1506.25	1557.19	1504.31
M178T358	(M-H)-	Hippuric acid	2.35189	0.284858	0.111728	178.05	358.42	140157	24501.8	12591.2	180530	79529.8	8477.65	17633.2	9173.53	55042	5451.9	16972.3	22713.1	4310.06	4310.52	4441.12	C01586	HMDB0000714/HMDB0011723/HMDB0062583	Cytoplasm	Benzenoids	Benzene and substituted derivatives	Benzoic acids and derivatives	Hippuric acids
M180T401	(M+H)+	Hippuric acid	0.906478	0.278725	0.101801	180.065	400.85	28502.8	7288.65	4444.8	41211.2	14554.2	1556.21	3810.72	1806.11	10826	1567.7	3293.66	5887.67	888.737	1408.11	1387.63	C01586	HMDB0000714/HMDB0011723/HMDB0062583	Cytoplasm	Benzenoids	Benzene and substituted derivatives	Benzoic acids and derivatives	Hippuric acids
M172T344	(M-H)-	Hexanoylglycine	1.26666	0.224897	0.127962	172.097	343.762	16907	4476.72	3277.17	53112.9	23562.9	2697.9	3341.85	2503.67	11459	1690.83	1550.71	2850.91	1459	1460.79	1537.61		HMDB0000701	Membrane;	Organic acids and derivatives	Carboxylic acids and derivatives	Amino acids, peptides, and analogues	N-acyl-alpha amino acids
M362T813	(M-H)-	Guanosine 5'-monophosphate (GMP)	0.644809	1.66779	0.377311	362.05	813.39	2882.97	8724.22	2622.4	2050.97	4190.34	3042.31	2378.9	4855.23	3476.61	2830.23	6206.29	19467.8	1917.85	1781.75	1917.01	C00144	HMDB0001397	Extracellular;Mitochondria;Nucleus;Lysosome;Golgi apparatus	Lipids and lipid-like molecules	Fatty Acyls	Eicosanoids	Prostaglandins and related compounds
M282T470	(M-H)-	Guanosine	0.745565	0.594101	0.150395	282.083	469.526	23316	35515.3	13802.1	8039.63	14049.4	9675.14	9796.55	10276.4	17882.5	6868.45	10454	6744.81	7496.99	7477.45	7224.5	C00387	HMDB0000133	Extracellular;Mitochondria;Lysosome	Nucleosides, nucleotides, and analogues	Purine nucleosides		Purine nucleosides
M284T526	(M+H)+	Guanosine	0.48663	0.675269	0.173669	284.098	526.051	17413.2	31400.9	15006.1	7828.27	11811.3	11831.3	8620.37	12776.6	14604.8	8668.18	10367.1	9310.1	7762.27	7716.1	7716.29	C00387	HMDB0000133	Extracellular;Mitochondria;Lysosome	Nucleosides, nucleotides, and analogues	Purine nucleosides		Purine nucleosides
M464T332	(M-H)-	Glycocholic acid	1.483	0.572133	0.0256154	464.313	332.286	45135.1	76757.5	85744.2	44927	77460.1	55730.4	40501.7	32110	53859.5	26766	58809.4	8656.07	36688	36166.6	37347.2	C01921	HMDB0000138/HMDB0032596	Extracellular	Lipids and lipid-like molecules	Steroids and steroid derivatives	Bile acids, alcohols and derivatives	Glycinated bile acids and derivatives
M464T332	(M-H)-	Glycocholic acid	1.483	0.572133	0.0256154	464.313	332.286	45135.1	76757.5	85744.2	44927	77460.1	55730.4	40501.7	32110	53859.5	26766	58809.4	8656.07	36688	36166.6	37347.2	C01921	HMDB0000138/HMDB0032596	Extracellular	Lipids and lipid-like molecules	Steroids and steroid derivatives	Bile acids, alcohols and derivatives	Glycinated bile acids and derivatives
M285T35	(M+H)+	Glycitein	0.334882	1.79702	0.484024	285.076	35.419	12113.8	15552.5	4113.84	3717.31	4083.93	926.184	6800.8	8730.53	46882.3	1955.59	2723.79	5699.95	849.635	847.369	894.925	C14536	HMDB0005781	Membrane (predicted from logP)	Phenylpropanoids and polyketides	Isoflavonoids	Isoflav-2-enes	Isoflavones
M258T976	M+	Glycerophosphocholine	1.00442	0.574727	0.0942549	258.11	976.057	45577.3	80236.1	35191.6	110952	27792.8	59292.2	29873.3	53025.9	35136.1	42405.1	30842.2	15068.6	32053.1	33163	47349.7	C00670	HMDB0000086	Cytoplasm;Extracellular;Membrane	Lipids and lipid-like molecules	Glycerophospholipids	Glycerophosphocholines	Glycerophosphocholines
M171T795	(M-H)-	Glycerol 3-phosphate	2.65561	2.5301	0.078448	171.006	795.13	33134	39563.3	41616.9	19853.8	49822.5	48600.5	30091.9	32860.4	208529	54722.3	160459	101815	34404.7	34469.4	35599.5	C00093	HMDB0000126	Cytoplasm;Mitochondria	Lipids and lipid-like molecules	Glycerophospholipids	Glycerophosphates	Glycerophosphates
M171T795	(M-H)-	Glycerol 3-phosphate	2.65561	2.5301	0.078448	171.006	795.13	33134	39563.3	41616.9	19853.8	49822.5	48600.5	30091.9	32860.4	208529	54722.3	160459	101815	34404.7	34469.4	35599.5	C00093	HMDB0000126	Cytoplasm;Mitochondria	Lipids and lipid-like molecules	Glycerophospholipids	Glycerophosphates	Glycerophosphates
M173T856	(M+H)+	Glycerol 3-phosphate	1.04242	2.50039	0.0760752	173.02	855.994	16389.2	19356.2	18810.2	11545.8	23211.8	26833.5	14616.9	16266.7	94279.2	24931.3	86717.7	53600.5	16373.8	16759.5	16721.5	C00093	HMDB0000126	Cytoplasm;Mitochondria	Lipids and lipid-like molecules	Glycerophospholipids	Glycerophosphates	Glycerophosphates
M91T193	(M-H)-	Glycerol	0.277422	1.67934	0.0216152	91.0392	192.805	227.441	472.78	696.091	546.067	776.43	920.702	970.639	1392.77	545.339	1106.27	1128.23	968.742	634.77	637.093	669.312	C00116	HMDB0000131	Extracellular;Mitochondria	Organic oxygen compounds	Organooxygen compounds	Carbohydrates and carbohydrate conjugates	Sugar alcohols
M105T549	(M-H)-	Glyceric acid	1.03187	0.547547	0.0928582	105.019	549.008	30336.5	53486.2	29545.6	30852.8	32090.2	9815.42	20056.9	16501	17386.8	6566.3	38140.1	3261.98	6804.18	8247.19	8127.07	C00258	HMDB0000139/HMDB0031818	Cytoplasm (predicted from logP)	Organic oxygen compounds	Organooxygen compounds	Carbohydrates and carbohydrate conjugates	Sugar acids and derivatives
M105T549	(M-H)-	Glyceric acid	1.03187	0.547547	0.0928582	105.019	549.008	30336.5	53486.2	29545.6	30852.8	32090.2	9815.42	20056.9	16501	17386.8	6566.3	38140.1	3261.98	6804.18	8247.19	8127.07	C00258	HMDB0000139/HMDB0031818	Cytoplasm (predicted from logP)	Organic oxygen compounds	Organooxygen compounds	Carbohydrates and carbohydrate conjugates	Sugar acids and derivatives
M171T892	(M+H)+	Glyceraldehyde 3-phosphate	0.18238	0.760453	0.0343046	171.004	891.995	2221.73	2052.21	2280.42	3081.32	2320.58	2883.66	2152.19	1462.6	2081.43	1594.79	2506.32	1487.76	1720.56	1688.4	1688.16	C00118/C00661	HMDB0001112	Cytoplasm (predicted from logP)	Organic oxygen compounds	Organooxygen compounds	Carbohydrates and carbohydrate conjugates	Glyceraldehyde-3-phosphates
M611T933	(M-H)-	Glutathione disulfide	0.35673	1.48625	0.202324	611.141	932.864	2290.86	1827.51	1969.93	1796.71	2195.05	2020.24	1690.45	1977.41	2316.02	3509.04	6332.55	2158.64	1958.21	1958.84	1802.46	C00127	HMDB0003337	Extracellular;Mitochondria	Organic acids and derivatives	Carboxylic acids and derivatives	Amino acids, peptides, and analogues	Oligopeptides
M613T992	(M+H)+	Glutathione disulfide	0.232558	2.5084	0.103485	613.158	991.802	770.566	782.739	805.018	703.03	532.267	493.712	700.347	614.432	1057.55	2476.58	4214.84	1188.9	714.925	716.236	902.917	C00127	HMDB0003337	Extracellular;Mitochondria	Organic acids and derivatives	Carboxylic acids and derivatives	Amino acids, peptides, and analogues	Oligopeptides
M330T870	(M+NH4-2H)-	Geranyl diphosphate	0.225078	0.703884	0.428604	330.095	870.347	4260.98	5803.97	2322.41	603.658	988.416	777.94	1217.86	1762.52	1717.19	1583.75	2037.77	2068.39	1284.38	1519.44	1513.4	C00341
M271T66	(M+H)+	Genistein	0.436594	1.48575	0.647275	271.059	66.252	48546.4	18321.5	6774.13	4176.67	13970.6	2900.34	12120.7	12081.2	96378.1	2296.32	6417.87	11391	1927.15	1776.2	1794.89	C06563/C09126	HMDB0003217/HMDB0033988	Membrane (predicted from logP);Cytoplasm;Extracellular	Phenylpropanoids and polyketides	Isoflavonoids	Isoflav-2-enes;Isoflavonoid O-glycosides	Isoflavones;Isoflavonoid O-glycosides
M277T433	(M+H-H2O)+	gamma-L-Glutamyl-L-phenylalanine	0.169232	0.756513	0.398716	277.118	432.639	2378.51	2174.63	1196.64	764.53	2102.97	1258.13	962.229	451.829	2067.43	523.721	2645.02	820.649	881.354	898.286	904.918
M277T907	(M+H)+	gamma-L-Glutamyl-L-glutamic acid	0.835156	0.489424	0.0919631	277.103	907.149	9321.41	11462.9	7095.58	37225.7	24073.7	15700.4	6057.39	6982.83	5235.76	10497.2	10153.1	12404.4	9633.34	9609.45	9687.35	C05282	HMDB0011737	Cellular Locations Not Available	Organic acids and derivatives	Carboxylic acids and derivatives	Amino acids, peptides, and analogues	Glutamic acid and derivatives
M275T844	(M-H)-	gamma-L-Glutamyl-L-glutamic acid	0.272297	0.713088	0.335789	275.087	844.497	1888.61	3223.83	1884.13	7227.47	3504.15	2239.69	1284.97	4412.56	2697.43	1871.51	2272.29	1700.09	1241.99	1098.11	1162.49	C05282	HMDB0011737	Cellular Locations Not Available	Organic acids and derivatives	Carboxylic acids and derivatives	Amino acids, peptides, and analogues	Glutamic acid and derivatives
M249T390	(M-H)-	Gamma-Glutamylcysteine	0.124142	0.712208	0.200823	249.055	390.14	2814.99	1929.41	959.511	1494.1	1135.59	1579.93	1775.27	1104.51	1679.03	1369.49	487.473	644.717	1483.96	1443.46	1482.5	C00669	HMDB0001049	Cytoplasm (predicted from logP)	Organic acids and derivatives	Carboxylic acids and derivatives	Amino acids, peptides, and analogues	N-acyl-alpha amino acids
M195T709	(M-H)-	Galactonic acid	1.25569	1.48455	0.406788	195.05	708.636	50801.7	29239.2	25906.2	27499.1	39446.1	14324.1	26973.8	43780.9	128196	20412	25703.4	32866.3	11056.8	10904.8	11056.7	C00880	HMDB0000565	Cytoplasm	Organic acids and derivatives	Hydroxy acids and derivatives	Medium-chain hydroxy acids and derivatives	Medium-chain hydroxy acids and derivatives
M401T676	(M+CH3COO)-	Galactinol	1.93924	2.31129	0.104612	401.129	675.919	27783.3	6123.53	15421.8	35336	22226.6	7454.22	76762.7	33136.5	15628.2	13744.2	34060.6	90953.2	15057	15262	15561	C01235	HMDB0005826	Cellular Locations Not Available	Organic oxygen compounds	Organooxygen compounds	Carbohydrates and carbohydrate conjugates	O-glycosyl compounds
M164T72	(M-H)-	Formylanthranilic acid	0.146484	0.82084	0.595531	164.035	72.395	2683.46	4479.63	2859.62	3122.53	2749.26	1011.22	1590.02	2363.03	6184.91	830.501	1676.78	1231.65	1494.16	1492.68	1702.82	C05653	HMDB0004089	Cytoplasm	Benzenoids	Benzene and substituted derivatives	Benzoic acids and derivatives	Benzoic acids
M786T795	(M+H)+	Flavin adenine dinucleotide (FAD)	0.450066	0.5918	0.0684536	786.162	794.533	6201.78	10460.8	6049.45	3218.91	5840.21	4098.52	4756.17	3315.23	5522.5	1791.63	3984.42	1857.73	2193.88	2194.41	2104.47	C00016	HMDB0001248	Cytoplasm;Mitochondria;Endoplasmic reticulum;Peroxisome	Organic oxygen compounds	Organooxygen compounds	Carbohydrates and carbohydrate conjugates	Hexose phosphates
M257T67	(M+H-H2O)+	Fisetinidol	0.293173	2.44104	0.399583	257.08	67.2885	10168.6	7586.76	2426.39	3362.57	3684.84	1365.98	6268.28	5106.61	49863.9	923.262	3229.46	4410.38	751.48	739.784	806.91
M131T555	(M-H)-	Ethylmalonic acid	0.298441	0.739812	0.486605	131.034	555.239	1430.74	1502.88	1152.08	5695.47	1892.79	854.772	1714.52	1269.51	1739.53	985.84	2080.48	1479.02	874.258	879.84	948.643		HMDB0000622	Extracellular;Membrane;	Lipids and lipid-like molecules	Fatty Acyls	Fatty acids and conjugates	Branched fatty acids
M337T67_2	(M-H)-	Erucic acid	0.567096	1.11817	0.664518	337.309	67.204	12662.3	9782.4	10097.8	12018.5	5748.77	5900.39	5994.51	7701.72	11490	13835	4979.95	18851.4	7008.03	6454.42	7037.11	C08316	HMDB0002068	Extracellular;Membrane (predicted from logP)	Lipids and lipid-like molecules	Fatty Acyls	Fatty acids and conjugates	Very long-chain fatty acids
M321T53	(M+H-H2O)+	Erucic acid	0.471256	1.12858	0.533821	321.315	52.933	39761.4	29423.7	20585.1	34557.6	25798.8	20875.6	17623.5	48964.9	41973.2	24048.2	32850.5	27529.1	34603.2	34322.3	34322.2	C08316	HMDB0002068	Extracellular;Membrane (predicted from logP)	Lipids and lipid-like molecules	Fatty Acyls	Fatty acids and conjugates	Very long-chain fatty acids
M338T15	(M+H)+	Erucamide	0.407553	1.60126	0.10261	338.341	15.468	2502.96	2307.49	2134.43	2572.93	2431.59	2426.55	2710.1	6927.99	2667.59	2077.26	3011.59	5625.16	2601.78	2601.8	2594.88
M230T653	(M+H)+	Ergothioneine	0.278462	0.583514	0.144763	230.095	652.913	6020.79	5847.16	2798.01	1442.4	1927.97	1802.25	1395.42	1546.02	2603.71	1877.5	2281.25	1872.21	1290.76	1340.13	1291.04	C05570	HMDB0003045	Cellular Locations Not Available	Organic acids and derivatives	Carboxylic acids and derivatives	Amino acids, peptides, and analogues	Histidine and derivatives
M495T61	(M-H)-	Enterostatin human	0.736093	0.984912	0.960469	495.276	61.129	50471	31139.6	25587.8	13084.4	12111.2	16354.1	10764.3	27254	40403.2	26966.5	26455.3	14660.4	16291.6	16291.7	16223
M293T38	(M-H)-	Embelin	0.953645	0.915116	0.698374	293.178	37.831	116438	111187	53173.3	45670.7	55247.2	52301.6	101288	64605.1	72456.2	45852.3	54522.2	58451.9	74546.7	71209.5	76834.9
M301T72_2	(M-H)-	Eicosapentaenoic acid	3.37386	1.31605	0.178181	301.216	72.14	198045	250159	185467	63858	226860	192056	186983	160814	373816	253273	274229	220185	135674	145561	145522	C06428	HMDB0001999	Extracellular;Membrane (predicted from logP)	Lipids and lipid-like molecules	Fatty Acyls	Fatty acids and conjugates	Long-chain fatty acids
M293T851	(M+H)+	EDTA	0.349802	0.448606	0.276385	293.098	850.815	1963.86	1562.14	1691.33	10849	1756.54	1387.21	1499.02	1404.56	1561.06	1100.35	1632.56	1420.21	1133.45	1017.41	1132.12	C00284	HMDB0015109	Cytoplasm;Extracellular;Membrane	Organic acids and derivatives	Carboxylic acids and derivatives	Tetracarboxylic acids and derivatives	Tetracarboxylic acids and derivatives
M179T482	(M-H)-	D-Tagatose	1.94294	0.455874	0.00790778	179.056	481.987	78378.2	59406.3	107813	102717	79635.8	51748.5	76859.8	17550	32056	11490.9	38013.2	42712.3	17422.7	17483.2	18501.3	C00795	HMDB0003418	Cellular Locations Not Available	Organic oxygen compounds	Organooxygen compounds	Carbohydrates and carbohydrate conjugates	Monosaccharides
M179T482	(M-H)-	D-Tagatose	1.94294	0.455874	0.00790778	179.056	481.987	78378.2	59406.3	107813	102717	79635.8	51748.5	76859.8	17550	32056	11490.9	38013.2	42712.3	17422.7	17483.2	18501.3	C00795	HMDB0003418	Cellular Locations Not Available	Organic oxygen compounds	Organooxygen compounds	Carbohydrates and carbohydrate conjugates	Monosaccharides
M181T555	(M-H)-	D-Sorbitol	2.19727	0.310948	0.00963419	181.071	554.513	108825	41327.6	113569	79330.4	80088.5	19322.7	30605.1	12227.8	22550	18276.5	42416.5	11507.5	26502.7	27316.9	27313.3	C00794	HMDB0000247	Extracellular;Membrane	Organic oxygen compounds	Organooxygen compounds	Carbohydrates and carbohydrate conjugates	Sugar alcohols
M181T555	(M-H)-	D-Sorbitol	2.19727	0.310948	0.00963419	181.071	554.513	108825	41327.6	113569	79330.4	80088.5	19322.7	30605.1	12227.8	22550	18276.5	42416.5	11507.5	26502.7	27316.9	27313.3	C00794	HMDB0000247	Extracellular;Membrane	Organic oxygen compounds	Organooxygen compounds	Carbohydrates and carbohydrate conjugates	Sugar alcohols
M230T711	M-	D-Ribulose 5-phosphate	0.272117	0.76389	0.291437	230.019	711.459	8642.24	10984.4	7677.53	4248.61	9009.54	3613.57	9599.24	4953.64	5318.3	3514.92	7479.65	2879.78	2712.51	1829.15	2688.63	C00199	HMDB0000618	Endoplasmic reticulum	Organic oxygen compounds	Organooxygen compounds	Carbohydrates and carbohydrate conjugates	Pentose phosphates
M213T878	(M+H-H2O)+	D-Ribulose 5-phosphate	0.0400776	0.940129	0.718581	213.015	878.157	5994.43	6644.06	8858.88	3576.69	6920.87	6074.06	4897.92	4655.56	8562.23	4261.01	7990.53	5422.52	5944.25	5266.67	5298.37	C00199	HMDB0000618	Endoplasmic reticulum	Organic oxygen compounds	Organooxygen compounds	Carbohydrates and carbohydrate conjugates	Pentose phosphates
M369T945	(M+CH3COO)-	D-Ribulose 1,5-bisphosphate	0.0806583	0.878645	0.628474	369	945.24	1312.58	1847.24	757.929	693.004	1074.86	993.171	474.441	1926.16	652.065	997.812	1033.9	783.9	887.026	887.96	907.765	C01182
M289T855	(M+CH3COO)-	D-Ribose 5-phosphate	0.588673	0.733769	0.262355	289.032	855.03	33287	41279.7	40284.3	12370.1	26193.5	26435.7	17840	13764.1	44528.5	10070.5	27113.1	18652.4	10603.9	10604	10640.5	C00117	HMDB0001548	Cytoplasm;Mitochondria	Organic oxygen compounds	Organooxygen compounds	Carbohydrates and carbohydrate conjugates	Pentose phosphates
M149T366	(M-H)-	D-Ribose	0.171963	0.65232	0.0254299	149.045	365.582	1377.24	1687.17	1729.22	682.305	1480.36	1231.45	1025.29	666.826	1048.3	755.149	664.259	1181.2	844.488	793.318	844.298	C00121/C21057	HMDB0000283	Extracellular	Organic oxygen compounds	Organooxygen compounds	Carbohydrates and carbohydrate conjugates	Pentoses
M223T555	(M+CH3COO)-	D-Quinovose	0.0407226	0.882971	0.423573	223.08	555.265	2243.86	1213.12	1407.36	1286.38	1381.55	1503.8	1625.02	1456.28	1749.61	1329.02	877.261	941.413	1307.92	1172.83	1300.96	C02522
M116T631	(M+H)+	D-Proline	0.229426	0.903991	0.543175	116.07	630.95	18848.7	30614.6	28011.8	19187	22527	25209.6	19084.4	10384.1	23488.2	17696.9	30714.8	29166.6	13443.4	11326.3	13394.9	C00763	HMDB0003411	Extracellular;Lysosome;Peroxisome	Organic acids and derivatives	Carboxylic acids and derivatives	Amino acids, peptides, and analogues	Proline and derivatives
M130T1066	(M+H)+	D-Pipecolinic acid	1.07874	0.294291	0.0721689	130.085	1065.55	60048.5	9407.04	15279.3	14246.1	47365.4	10272.2	7952.34	5663.03	15108.1	725.29	5185.56	11457	4929.11	4987.89	4931.81
M136T600	(M+H-H2O)+	Dopamine	0.606077	0.528454	0.066184	136.075	599.702	16520.9	17787.6	8443.26	6324.15	6813.08	6392.61	4977.29	3370.16	8019.61	2520.6	8249.55	5775.72	3067.62	3067.61	3166.62	C03758	HMDB0000073	Cytoplasm;Extracellular	Benzenoids	Phenols	Benzenediols	Catecholamines and derivatives
M199T1324	(M-H)-	Dodecanoic acid	0.32162	1.37985	0.488476	199.17	1323.61	5423.48	3248.87	3679.11	2260.41	3389.33	3944.09	14332.7	2557.36	2896.02	4736.47	2951.08	2807.56	4055.79	4065.45	3835.09	C02679	HMDB0000638	Cytoplasm;Extracellular;Membrane (predicted from logP)	Lipids and lipid-like molecules	Fatty Acyls	Fatty acids and conjugates	Medium-chain fatty acids
M333T67	(M-H)-	Docosatrienoic Acid	0.493343	0.777177	0.364918	333.276	67.194	44937.6	32145.1	20999.3	8233.28	20476.3	24703.3	19837.1	14305.1	32837.7	16978	11264	22516.4	14373.5	14403.6	15098.1
M243T917_1	(M+H-H2O)+	D-Mannose-6-phosphate	1.27995	0.49973	0.0645147	243.026	917.402	50389.8	58290.8	52043.5	11598.4	111646	57284.8	26768.9	18485.5	43491.2	17849.2	36803	27137	23080.2	23042.1	21539.6	C00275	HMDB0001078	Cytoplasm (predicted from logP)	Organic oxygen compounds	Organooxygen compounds	Carbohydrates and carbohydrate conjugates	Hexose phosphates
M259T839	(M-H)-	D-Mannose 1-phosphate	3.38836	0.488345	0.124807	259.022	839.396	311232	538641	233856	40823.9	211759	121317	128202	86242.8	215909	63833.1	144492	73146.1	48663.3	49896.6	49893	C00636	HMDB0006330	Cytoplasm	Organic oxygen compounds	Organooxygen compounds	Carbohydrates and carbohydrate conjugates	Monosaccharide phosphates
M183T599	(M+H)+	D-Mannitol	0.632493	0.42184	0.0140841	183.084	599.084	12588.2	10261.6	5926.26	9432.45	6773.89	2929.39	2628	2137.19	4057.71	1997.33	6260.11	3130.76	2094.78	1905.87	2121.66	C00392	HMDB0000765	Extracellular;Membrane	Organic oxygen compounds	Organooxygen compounds	Carbohydrates and carbohydrate conjugates	Sugar alcohols
M149T618	(M-H)-	D-Lyxose	0.349745	0.344487	0.0628623	149.045	618.287	4513.75	459.836	1123.29	2718.06	3010.76	752.224	861.824	386.989	1056.86	627.464	1004.63	395.164	530.576	551.57	530.946	C00476
M104T689	(M-H)-	DL-Serine	1.49583	0.438692	0.0303413	104.035	689.225	62133	70404.3	28736.4	26555.1	42652.2	19398.1	14822.5	10234	35644.1	10818.1	20991.5	17109.9	5827.28	6028.26	5903.37	C00740/C00065	HMDB0003406/HMDB0000187/HMDB0062263	Cytoplasm;Extracellular;Mitochondria;Peroxisome	Organic acids and derivatives	Carboxylic acids and derivatives	Amino acids, peptides, and analogues	Serine and derivatives
M104T689	(M-H)-	DL-Serine	1.49583	0.438692	0.0303413	104.035	689.225	62133	70404.3	28736.4	26555.1	42652.2	19398.1	14822.5	10234	35644.1	10818.1	20991.5	17109.9	5827.28	6028.26	5903.37	C00740/C00065	HMDB0003406/HMDB0000187/HMDB0062263	Cytoplasm;Extracellular;Mitochondria;Peroxisome	Organic acids and derivatives	Carboxylic acids and derivatives	Amino acids, peptides, and analogues	Serine and derivatives
M89T414	(M-H)-	DL-lactate	6.41287	0.358325	0.146956	89.0241	414.457	431637	458509	283555	1.65659e+06	358678	149492	188522	174432	337303	105811	238121	152064	96841.1	98265.4	106778	C00256/C00186	HMDB0001311/HMDB0000190	Cytoplasm;Extracellular;Mitochondria	Organic acids and derivatives	Hydroxy acids and derivatives	Alpha hydroxy acids and derivatives	Alpha hydroxy acids and derivatives
M175T598	(M+H)+	DL-Arginine	0.4034	1.36902	0.262657	175.118	598.298	5045.56	2703.27	4989.62	4643.75	3805.88	7526.27	12162.4	6310.79	5251.62	3146.35	4167.29	8272.02	6792.57	7129.11	6790.81	C00062/C00792	HMDB0000517/HMDB0003416	Cytoplasm;Extracellular;Mitochondria;Peroxisome	Organic acids and derivatives	Carboxylic acids and derivatives	Amino acids, peptides, and analogues	L-alpha-amino acids;D-alpha-amino acids
M165T157	(M-H)-	DL-3-Phenyllactic acid	5.78222	0.276074	0.000925044	165.055	157.056	465656	290220	407897	441713	455129	155476	172579	64100.5	144281	41586.6	173338	15921.3	82522.5	90024.6	89730.8	C01479	HMDB0000779/HMDB0014712	Membrane	Phenylpropanoids and polyketides/Alkaloids and derivatives	Phenylpropanoic acids/Tropane alkaloids		Phenylpropanoic acids/Tropane alkaloids
M165T157	(M-H)-	DL-3-Phenyllactic acid	5.78222	0.276074	0.000925044	165.055	157.056	465656	290220	407897	441713	455129	155476	172579	64100.5	144281	41586.6	173338	15921.3	82522.5	90024.6	89730.8	C01479	HMDB0000779/HMDB0014712	Membrane	Phenylpropanoids and polyketides/Alkaloids and derivatives	Phenylpropanoic acids/Tropane alkaloids		Phenylpropanoic acids/Tropane alkaloids
M185T890	(M-H)-	DL-2-Phosphoglycerate	1.53721	1.31908	0.218938	184.985	889.636	33777.4	51482.4	45281.5	15630.7	61942.5	42742.1	62590	88857.6	57390.4	44096.8	38878.7	39086.7	30085.8	37375.1	37192.5	C00631	HMDB0003391	Cytoplasm (predicted from logP)	Organic oxygen compounds	Organooxygen compounds	Carbohydrates and carbohydrate conjugates	Sugar acids and derivatives
M160T753	(M-H)-	DL-2-Aminoadipic acid	0.335914	0.944236	0.814072	160.061	753.292	8038.58	9970.55	4621.46	3396.12	4566.99	3667.46	4513.96	6365.69	7840.03	4028.08	6577.27	3025.6	2480.97	2497.94	2624.94	C00956	HMDB0000510	Cytoplasm;Mitochondria
M129T191	(M-H2O-H)-	Dihydroxyfumarate	0.444206	1.0316	0.924549	129.055	190.942	41356.8	20477.7	23771.9	15533.8	14684.8	29813.5	22790.7	9387.25	21000.8	11556.1	54793.8	30712	9467.79	9482.6	10138	C00975	HMDB0002050	Cytoplasm (predicted from logP)	Organic acids and derivatives	Keto acids and derivatives	Short-chain keto acids and derivatives	Short-chain keto acids and derivatives
M169T833	(M-H)-	Dihydroxyacetone phosphate	0.551514	0.753126	0.348137	168.99	832.905	10377.3	8282.52	7486.53	20113.5	9942.62	4915.08	10213.8	3822.89	11369.4	6620.09	10278.6	3724.41	4965.6	4962.01	5657.79	C00111	HMDB0001473	Peroxisome	Organic oxygen compounds	Organooxygen compounds	Carbohydrates and carbohydrate conjugates	Monosaccharide phosphates
M71T139	(M-H2O-H)-	Dihydroxyacetone	0.574923	2.11337	0.0326474	71.0133	138.971	1657.98	3486.19	2114.88	188.555	2014.87	1326.8	2872.61	3503.5	6296.34	5355.52	2668.55	2105.23	856.748	1592.12	1073.28	C00184	HMDB0001882	Cytoplasm (predicted from logP)	Organic oxygen compounds	Organooxygen compounds	Carbohydrates and carbohydrate conjugates	Monosaccharides
M113T530	(M-H)-	Dihydrouracil	0.457837	0.795187	0.696672	113.035	530.373	31040.3	10773.1	4043.71	3974.2	4356.03	4385.62	6316.68	19106.8	8144.22	3808.1	4288	4912.6	4134.54	4390.14	4770.02	C00429	HMDB0000076	Cytoplasm;Nucleus	Organoheterocyclic compounds	Diazines	Pyrimidines and pyrimidine derivatives	Pyrimidones
M351T921	(2M-H)-	D-Glucuronolactone	0.277745	1.30523	0.21309	351.05	920.724	1455.66	1828.57	1454.55	836.632	1560.42	1280.88	2253.55	1985.53	2950.29	1127.85	1089.68	1578.86	1068.18	1132.11	1192.04	C02670	HMDB0006355	Cytoplasm;Mitochondria;Endoplasmic reticulum	Organoheterocyclic compounds	Furofurans	Isosorbides	Isosorbides
M261T938	(M+H)+	D-Glucose 6-phosphate	0.691383	0.678065	0.124735	261.036	937.997	31895.8	37335.4	30166	7658.5	23047.3	18383.2	17055	13348.2	24322.9	12095.2	19489.1	14373.1	12922.3	12353.2	12331.5	C00092	HMDB0001401	Endoplasmic reticulum	Organic oxygen compounds	Organooxygen compounds	Carbohydrates and carbohydrate conjugates	Hexose phosphates
M258T771	(M-H)-	D-Glucosamine 1-phosphate (Glucosamine-1P)	0.742701	0.552182	0.0769641	258.038	771.129	22723.6	19888.2	11915.9	6127.65	11366.7	7529.65	8703.22	5054.32	11552.8	4607.94	9921.2	4087.57	3775.67	3782.23	3872.77	C06156
M177T480	(M-H)-	D-Glucono-1,5-lactone	0.103281	0.85418	0.605667	177.04	480.286	3689.76	5795.86	3905.06	5043.45	8908.16	2001.28	8127.57	4001.98	2790.59	2495.7	2192.92	5455.93	2245.87	2579.68	2578.72	C00198	HMDB0000150	Cytoplasm
M255T552	(M+CH3COO)-	D-gluconate	0.166348	1.09618	0.655527	255.071	551.579	982.141	473.119	831.428	1307.05	800.705	531.872	1048.25	747.45	727.578	611.17	858.189	1407.48	744.801	702.182	701.689	C00257	HMDB0000625	Cytoplasm (predicted from logP)	Organic oxygen compounds	Organooxygen compounds	Carbohydrates and carbohydrate conjugates	Sugar acids and derivatives
M193T714	(M-H)-	D-galacturonic acid	0.709814	0.68569	0.168813	193.035	713.698	46874.1	46855.8	18571.4	43097.7	46181.9	14186.3	26583.4	22527.5	44776.1	15489.6	16325.8	22247.1	11675.4	12027.4	12042.7	C00333
M191T154	(M-H2O-H)-	D-Galactarate	2.86419	1.83114	0.0810141	191.019	153.582	60552.5	79622.2	156882	39891.2	49358.2	91307.2	127853	155185	269187	103274	163563	55515.3	57870.1	62405.5	57979	C00879	HMDB0000639	Cytoplasm (predicted from logP)	Organic oxygen compounds	Organooxygen compounds	Carbohydrates and carbohydrate conjugates	Glucuronic acid derivatives
M191T154	(M-H2O-H)-	D-Galactarate	2.86419	1.83114	0.0810141	191.019	153.582	60552.5	79622.2	156882	39891.2	49358.2	91307.2	127853	155185	269187	103274	163563	55515.3	57870.1	62405.5	57979	C00879	HMDB0000639	Cytoplasm (predicted from logP)	Organic oxygen compounds	Organooxygen compounds	Carbohydrates and carbohydrate conjugates	Glucuronic acid derivatives
M339T943	(M-H)-	D-Fructose 1,6-bisphosphate	0.394747	0.645627	0.383029	338.987	943.041	11001.8	17122.5	4653.6	1867.54	3441.36	2721.58	3741.13	9169.03	4113.74	3015.45	3212.95	3094.7	1849.54	1890	1783.92	C00354
M323T1002	(M+H-H2O)+	D-Fructose 1,6-bisphosphate	0.2712	0.789419	0.588613	322.992	1002.12	7010.96	7609.17	3128.21	83.0774	2256.46	1667.56	1979.21	5635.37	2282.07	2816.33	1693.69	2767.5	1087.28	1220.79	1090.99	C00354
M367T36	(M+H-H2O)+	Desmosterol	3.6874	0.600217	0.0385244	367.336	36.321	800771	737825	421022	366593	434967	371286	311420	430208	343348	325940	319521	149721	356141	356209	372441	C01802	HMDB0002719	Extracellular;Membrane (predicted from logP);Endoplasmic reticulum	Lipids and lipid-like molecules	Steroids and steroid derivatives	Cholestane steroids	Cholesterols and derivatives
M199T831	(M-H)-	D-Erythrose 4-phosphate	0.593007	1.20782	0.446065	199.001	830.814	11156.1	9409.71	11693.6	3236.98	19129.8	6580.24	10734.6	9330.67	17356.2	9590.8	16800.1	10114.1	6960.51	8345.03	8383.6	C00279	HMDB0001321	Cytoplasm (predicted from logP)	Organic oxygen compounds	Organooxygen compounds	Carbohydrates and carbohydrate conjugates	Monosaccharide phosphates
M251T321	(M-H)-	Deoxyinosine	0.618117	1.30263	0.116918	251.078	320.765	7562.6	5916.93	5153.86	3076.77	4416.25	3446.78	6586.64	6844.84	5788.45	4248.82	8248.88	6805.43	3599.62	3587.26	3877.62	C05512	HMDB0000071	Cytoplasm;Extracellular;Nucleus	Nucleosides, nucleotides, and analogues	Purine nucleosides	Purine 2'-deoxyribonucleosides	Purine 2'-deoxyribonucleosides
M226T370	(M-H)-	Deoxycytidine	0.170879	0.725472	0.415708	226.083	370.408	6655.55	558.793	3838.19	2052.7	3859.92	2449.87	2950.26	652.817	2193.62	2007	4953.8	1327.56	2091.1	2323.88	2094.7	C00881	HMDB0000014	Extracellular;Mitochondria;Nucleus;Lysosome	Nucleosides, nucleotides, and analogues	Pyrimidine nucleosides	Pyrimidine 2'-deoxyribonucleosides	Pyrimidine 2'-deoxyribonucleosides
M228T415	(M+H)+	Deoxycytidine	0.127984	0.884851	0.496873	228.097	414.897	20296.9	7352.55	12186.9	11948.9	12321	10631.6	8868.08	10871.2	14217.4	7497.57	13386.8	11290.7	6090.31	6090.48	6395.31	C00881	HMDB0000014	Extracellular;Mitochondria;Nucleus;Lysosome	Nucleosides, nucleotides, and analogues	Pyrimidine nucleosides	Pyrimidine 2'-deoxyribonucleosides	Pyrimidine 2'-deoxyribonucleosides
M316T384	M+	Decanoyl-L-carnitine	0.347812	0.850594	0.665423	316.247	384.373	40367.5	10828.2	38492.3	6680.21	16406	10608.6	9591.27	27317.8	27458.6	12202.3	14876.4	13502.1	6824.88	6824.45	6730.42
M132T741	(M-H)-	D-Aspartic acid	0.96725	0.662334	0.245704	132.03	740.887	56727.3	68264.1	44991.5	13908.8	26604.3	17728.5	21184.9	15187.5	46101.7	13619.1	35258	19809.6	11552.5	11633.7	12438.2	C00402	HMDB0006483	Cytoplasm;Extracellular;Peroxisome	Organic acids and derivatives	Carboxylic acids and derivatives	Amino acids, peptides, and analogues	Aspartic acid and derivatives
M147T141	(M-H)-	D-Arabinono-1,4-lactone	1.67615	1.93163	0.0475117	147.029	141	22925.4	25038.4	35372.5	6168.7	21033.6	20001.3	49176.6	22084.5	61191	38173.1	64625.9	16904.1	17076.8	16710.4	17065.2
M147T141	(M-H)-	D-Arabinono-1,4-lactone	1.67615	1.93163	0.0475117	147.029	141	22925.4	25038.4	35372.5	6168.7	21033.6	20001.3	49176.6	22084.5	61191	38173.1	64625.9	16904.1	17076.8	16710.4	17065.2
M255T74	(M+H)+	Daidzein	0.497472	2.532	0.38253	255.065	74.231	33370	11068.4	6910.84	4625.26	16095	2169.57	13179.3	12853.9	131705	2968.03	6793.21	20473.5	1990.49	1993.63	2108.02	C10208	HMDB0003312	Membrane (predicted from logP)	Phenylpropanoids and polyketides	Isoflavonoids	Isoflav-2-enes	Isoflavones
M239T726	(M+CH3COO)-	D-(+)-Mannose	1.51239	0.890668	0.604806	239.077	726.468	252534	358086	180210	112575	165032	157205	190822	184391	277049	125209	149958	164210	91946.5	96292.3	96247.4	C00159	HMDB0000169	Cytoplasm;Extracellular;Lysosome;Endoplasmic reticulum;Golgi apparatus	Organic oxygen compounds	Organooxygen compounds	Carbohydrates and carbohydrate conjugates	Hexoses
M103T434	(M-H)-	D(-)-beta-hydroxy butyric acid	0.556789	2.46798	0.106051	103.04	433.609	2204.49	1771.15	1266.15	690.569	594.433	2525.31	4858.94	1971.57	1621.59	8790.4	777.917	4319.97	2766.12	2794.49	3135.4
M112T415	(M+H)+	Cytosine	0.710682	0.637087	0.107665	112.05	415.05	46734.6	27005.6	26601	22898.9	23844.3	20421	15879	1194.37	29814.4	12042.4	23424.5	24360.9	10163.8	11134.1	11136.8	C00380	HMDB0000630	Extracellular	Organoheterocyclic compounds	Diazines	Pyrimidines and pyrimidine derivatives	Pyrimidones
M613T818	(M-H)-	Cytidine monophosphate N-acetylneuraminic acid	0.533989	1.05098	0.811343	613.138	817.887	9499.65	17703.4	10771.3	3569.2	10966.6	13766.6	9606.59	9097.63	16422.5	9344.33	10625.9	14558.5	6085	5987.35	6132.18	C00128	HMDB0001176	Cytoplasm;Nucleus;Golgi apparatus	Nucleosides, nucleotides, and analogues	Pyrimidine nucleotides	Pyrimidine nucleotide sugars	Pyrimidine nucleotide sugars
M306T649	(M+H-H2O)+	Cytidine 5'-monophosphate (CMP)	0.244412	1.74101	0.244188	306.048	649.158	718.079	861.746	982.219	869.06	965.016	642.279	610.747	909.694	993.302	688.664	1748.44	3821.04	640.043	626.415	640.016	C00055	HMDB0000095	Extracellular;Mitochondria;Nucleus;Lysosome;Golgi apparatus	Nucleosides, nucleotides, and analogues	Pyrimidine nucleotides	Pyrimidine ribonucleotides	Pyrimidine ribonucleoside monophosphates
M324T905	(M+H)+	Cytidine 5'-monophosphate	0.174459	1.04892	0.805909	324.059	904.635	3451.62	6273.23	3689.44	1874.33	4530.7	4796.51	3213.57	3317.39	5774.13	3075.68	4702.43	5736.76	2128.89	2248.5	2126.9
M386T928	(M+H-H2O)+	Cytidine 5'-diphosphate (CDP)	0.124585	1.37115	0.395209	386.014	928.478	637.442	1657.29	1063.53	834.677	2655.89	1058.68	770.625	626.937	3442.15	1166.5	2597	2239.18	966.778	965.622	908.282	C00112	HMDB0001546	Mitochondria;Nucleus	Nucleosides, nucleotides, and analogues	Pyrimidine nucleotides	Pyrimidine ribonucleotides	Pyrimidine ribonucleoside diphosphates
M242T430	(M-H)-	Cytidine	0.808401	0.868165	0.585395	242.078	429.72	86860.1	81123.7	47695.4	17406.8	47823.8	37271.3	38532.5	29625.7	70573.5	35570	47610	54322.1	19720.9	20305.7	20300.5	C00475	HMDB0000089	Extracellular;Mitochondria;Nucleus;Lysosome	Nucleosides, nucleotides, and analogues	Pyrimidine nucleosides		Pyrimidine nucleosides
M244T481	(M+H)+	Cytidine	0.585779	0.872604	0.550739	244.092	480.918	71792.3	64015.7	32797.1	26666.6	41216.9	31894.9	44464.1	19904.2	39700.8	36768.6	58663.7	34691.2	27643.1	27343.9	27045.3	C00475	HMDB0000089	Extracellular;Mitochondria;Nucleus;Lysosome	Nucleosides, nucleotides, and analogues	Pyrimidine nucleosides		Pyrimidine nucleosides
M178T74	(M-H)-	Cyclohexylsulfamate	9.63983	0.24928	0.0600391	178.054	74.038	1.33346e+06	423216	431541	2.78953e+06	1.4807e+06	284556	395605	182850	146907	82080.5	399436	474019	196664	197266	203802
M178T74	(M-H)-	Cyclohexylsulfamate	9.63983	0.24928	0.0600391	178.054	74.038	1.33346e+06	423216	431541	2.78953e+06	1.4807e+06	284556	395605	182850	146907	82080.5	399436	474019	196664	197266	203802
M160T783	(M+CH3COO+2H)+	Cyclohexylamine	1.37455	1.33802	0.409744	160.133	783.439	67071.6	269101	211778	124128	108888	44586.6	94579.9	190052	200226	44966.4	262563	312216	70650	61439.9	58129.6	C00571	HMDB0031404	Cytoplasm;Extracellular	Organic nitrogen compounds	Organonitrogen compounds	Cyclohexylamines	Cyclohexylamines
M114T334	(M+H)+	Creatinine	4.94228	0.467862	0.125306	114.065	333.774	1.0477e+06	326222	285092	1.41097e+06	623909	220940	226753	242936	623434	164458	304814	269206	96755.4	100751	100749	C00791	HMDB0000562	Cytoplasm	Organic acids and derivatives	Carboxylic acids and derivatives	Amino acids, peptides, and analogues	Alpha amino acids and derivatives
M112T296	(M-H)-	Creatinine	0.361416	0.574481	0.385723	112.051	296.148	14558	2725.71	2405.92	4038.95	2330.88	1095.4	2028.01	1615.69	5326.57	1456.88	2593.35	2579.46	1165.28	1237.72	1163.19	C00791	HMDB0000562	Cytoplasm	Organic acids and derivatives	Carboxylic acids and derivatives	Amino acids, peptides, and analogues	Alpha amino acids and derivatives
M130T637	(M-H)-	Creatine	0.576946	0.659574	0.0225415	130.062	637.348	19255.8	23525.9	17052.5	14982	14673.2	15260.8	13088.1	10196.5	11782.6	5491.37	18226.2	10305.7	8624.81	9396.19	9381.57	C00300	HMDB0000064	Cytoplasm;Extracellular;Mitochondria	Organic acids and derivatives	Carboxylic acids and derivatives	Amino acids, peptides, and analogues	Alpha amino acids and derivatives
M132T691	(M+H)+	Creatine	0.55388	0.699396	0.103967	132.075	691.196	33715	19097.9	15780.3	17384.6	17235.6	16465.5	16524.4	8612.36	15097.4	10643.4	21101.9	11723.6	11322.2	11507.9	11513.5	C00300	HMDB0000064	Cytoplasm;Extracellular;Mitochondria	Organic acids and derivatives	Carboxylic acids and derivatives	Amino acids, peptides, and analogues	Alpha amino acids and derivatives
M191T920	(M-H)-	Citrate	3.46119	0.411596	0.013444	191.019	920.279	113476	282256	101707	285823	243183	131147	138693	69604.8	39814	75857.1	88223	64267.3	67694.9	67822.7	67697.2	C00158	HMDB0000094	Cytoplasm;Extracellular;Mitochondria	Organic acids and derivatives	Carboxylic acids and derivatives	Tricarboxylic acids and derivatives	Tricarboxylic acids and derivatives
M191T920	(M-H)-	Citrate	3.46119	0.411596	0.013444	191.019	920.279	113476	282256	101707	285823	243183	131147	138693	69604.8	39814	75857.1	88223	64267.3	67694.9	67822.7	67697.2	C00158	HMDB0000094	Cytoplasm;Extracellular;Mitochondria	Organic acids and derivatives	Carboxylic acids and derivatives	Tricarboxylic acids and derivatives	Tricarboxylic acids and derivatives
M129T820_2	(M-H)-	Citraconic acid	1.13539	0.539937	0.055627	129.019	819.573	39772	47486.1	27026.6	66260	45471	7096.96	24945.8	22304.3	20121.6	19553.8	20254.1	18686.7	15981.2	15981.6	16477.7	C02226	HMDB0000634	Extracellular;Membrane	Lipids and lipid-like molecules	Fatty Acyls	Fatty acids and conjugates	Methyl-branched fatty acids
M129T820_2	(M-H)-	Citraconic acid	1.13539	0.539937	0.055627	129.019	819.573	39772	47486.1	27026.6	66260	45471	7096.96	24945.8	22304.3	20121.6	19553.8	20254.1	18686.7	15981.2	15981.6	16477.7	C02226	HMDB0000634	Extracellular;Membrane	Lipids and lipid-like molecules	Fatty Acyls	Fatty acids and conjugates	Methyl-branched fatty acids
M173T820	(M-H)-	cis-Aconitate	1.43711	0.543081	0.059385	173.009	819.562	63116	81606.9	43102.3	109793	75982.6	12210.2	41391.9	35964.5	32547.9	33732.7	33179.8	32709.7	25517.3	26629.7	26628.9	C00417	HMDB0000072	Cytoplasm	Organic acids and derivatives	Carboxylic acids and derivatives	Tricarboxylic acids and derivatives	Tricarboxylic acids and derivatives
M173T820	(M-H)-	cis-Aconitate	1.43711	0.543081	0.059385	173.009	819.562	63116	81606.9	43102.3	109793	75982.6	12210.2	41391.9	35964.5	32547.9	33732.7	33179.8	32709.7	25517.3	26629.7	26628.9	C00417	HMDB0000072	Cytoplasm	Organic acids and derivatives	Carboxylic acids and derivatives	Tricarboxylic acids and derivatives	Tricarboxylic acids and derivatives
M253T75_2	(M-H)-	cis-9-Palmitoleic acid	7.07065	1.40256	0.0258156	253.217	74.746	412481	575945	724001	283003	674950	716561	736512	731935	792003	1.01535e+06	756544	718060	723868	744830	743737	C08362	HMDB0003229	Extracellular;Membrane (predicted from logP)	Lipids and lipid-like molecules	Fatty Acyls	Fatty acids and conjugates	Long-chain fatty acids
M253T75_2	(M-H)-	cis-9-Palmitoleic acid	7.07065	1.40256	0.0258156	253.217	74.746	412481	575945	724001	283003	674950	716561	736512	731935	792003	1.01535e+06	756544	718060	723868	744830	743737	C08362	HMDB0003229	Extracellular;Membrane (predicted from logP)	Lipids and lipid-like molecules	Fatty Acyls	Fatty acids and conjugates	Long-chain fatty acids
M104T533	M+	Choline	3.26242	0.813857	0.0927724	104.106	533.016	2.98786e+06	1.79441e+06	2.55345e+06	2.27392e+06	2.48326e+06	2.16694e+06	2.31426e+06	1.77342e+06	2.50151e+06	1.79847e+06	1.899e+06	1.31882e+06	1.72617e+06	1.79226e+06	1.79155e+06	C00114	HMDB0000097	Cytoplasm;Extracellular;Mitochondria;Nucleus;Endoplasmic reticulum;Golgi apparatus	Organic nitrogen compounds	Organonitrogen compounds	Quaternary ammonium salts	Cholines
M360T785	(M+NH4)+	Cellobiose	0.450765	0.758044	0.462143	360.149	784.744	15692.6	16511.9	16890.4	29518.7	12498.7	61018.8	29872.8	21728.2	12358.1	18473.2	11418.2	21471.6	20045.8	20040.1	20397.5	C00185	HMDB0000055	Cytoplasm;	Organic oxygen compounds	Organooxygen compounds	Carbohydrates and carbohydrate conjugates	O-glycosyl compounds
M143T1283	(M-H)-	Caprylic acid	0.299509	1.00569	0.978604	143.107	1283.04	3409.46	2782.34	3296.74	4440.7	5589.96	8904.59	6227.25	4396.74	4131.45	5016.18	4395.61	4418.31	5870.38	6900.98	6762.69	C06423	HMDB0000482/HMDB0062511	Cytoplasm;Extracellular;Membrane (predicted from logP)	Lipids and lipid-like molecules	Fatty Acyls	Fatty acids and conjugates	Medium-chain fatty acids
M171T79	(M-H)-	Capric acid	1.62547	0.322806	0.0513002	171.139	79.014	29790.6	31382.8	75525.8	99979.2	26247.2	11598.1	19354.3	17213.8	11334.5	13181.8	14851.7	12681.7	13662	15254.6	13593.8	C01571	HMDB0000511	Extracellular;Membrane (predicted from logP)	Lipids and lipid-like molecules	Fatty Acyls	Fatty acids and conjugates	Medium-chain fatty acids
M171T79	(M-H)-	Capric acid	1.62547	0.322806	0.0513002	171.139	79.014	29790.6	31382.8	75525.8	99979.2	26247.2	11598.1	19354.3	17213.8	11334.5	13181.8	14851.7	12681.7	13662	15254.6	13593.8	C01571	HMDB0000511	Extracellular;Membrane (predicted from logP)	Lipids and lipid-like molecules	Fatty Acyls	Fatty acids and conjugates	Medium-chain fatty acids
M195T68_1	(M+H)+	Caffeine	0.776101	1.20013	0.110302	195.087	67.786	14417.4	13650.2	11026.8	10150.1	9794.41	13486.4	13892.5	17528	12778.4	15389.3	10354.5	17097.1	14974	15181.1	15178.8	C07481	HMDB0001847	Cytoplasm (predicted from logP)	Organoheterocyclic compounds	Imidazopyrimidines	Purines and purine derivatives	Xanthines
M372T830	(M+K-2H)-	beta-Nicotinamide D-ribonucleotide	0.126314	0.882972	0.644319	372.009	830.274	6502.93	5921.29	6548.84	2452.26	6941.5	6328.7	6397.73	1954.42	10229.7	3320.12	5891.01	2842.19	2569.14	2836.81	2832.16	C00455	HMDB0000229	Cytoplasm;Mitochondria;Nucleus	Nucleosides, nucleotides, and analogues	Pyridine nucleotides	Nicotinamide nucleotides	Nicotinamide nucleotides
M102T746	(M+H)+	Betaine aldehyde	0.664056	0.677779	0.446882	102.09	745.77	49328.5	9850.13	13404	10946.6	19756.4	8709.73	17735.8	2113.76	28130.8	1871.41	17073.2	8983.09	10011.7	9968.74	9239.56	C00576	HMDB0001252	Cytoplasm;Mitochondria	Organic nitrogen compounds	Organonitrogen compounds	Quaternary ammonium salts	Tetraalkylammonium salts
M118T545	(M+H)+	Betaine	1.31865	0.817802	0.233028	118.086	544.702	340314	675025	429964	573836	456495	472966	360530	577553	321955	314956	288712	547663	394132	383349	383476	C00719	HMDB0000043/HMDB0059606	Cytoplasm;Extracellular;Mitochondria	Organic acids and derivatives	Carboxylic acids and derivatives	Amino acids, peptides, and analogues	Alpha amino acids
M297T833	(M+K-2H)-	Beta-D-Fructose 6-phosphate	0.32052	1.07503	0.798684	296.977	833.089	7701.58	8207.42	2286.67	3827.38	8707.48	3740.91	10917	5937.24	7537.08	5362.81	5254.94	2048.8	6229.19	6549.44	6538.91	C05345	HMDB0003971	Cytoplasm (predicted from logP)	Organic oxygen compounds	Organooxygen compounds	Carbohydrates and carbohydrate conjugates	Pentose phosphates
M243T901	(M+H-H2O)+	Beta-D-Fructose 2-phosphate	1.17995	0.483274	0.0662562	243.026	900.983	48666.9	55325.3	34767.5	5844.5	29251.4	18209.5	18346.5	12206.7	24255.5	9433.5	20819.5	7758.31	7488.19	7587.58	7588.22	C03267	HMDB0006800	Cellular Locations Not Available	Organic oxygen compounds	Organooxygen compounds	Carbohydrates and carbohydrate conjugates	C-glycosyl compounds
M290T878	(M+H)+	Asp-Arg	1.27594	2.52761	0.120117	290.145	878.148	2035.74	20414.1	4418.37	2548.28	4889.16	4424.82	9527.04	28780.7	3188.22	26995.8	2936.51	26467.1	12309.1	12748.2	12747.7
M304T899	(M+H)+	Arg-Glu	0.777593	0.226345	0.295228	304.161	899.202	2256.44	4553.2	2533.09	49235.3	2810.21	4350.91	1581.27	3468.79	1869.45	3488.28	1663.73	2808.18	1678.69	1728	1678.51
M246T842	(M+H)+	Arg-Ala	0.326718	0.527507	0.230546	246.155	842.257	2564.97	3063.51	1799.16	10442.8	1730.43	2769.04	1265.41	1646.99	2715.55	2579.49	1718.88	1873.95	1505.92	1373.11	1349.11
M303T177	(M-H)-	Arachidonic Acid (peroxide free)	1.18447	0.323666	0.130361	303.232	177.207	70806	19140.5	21110.3	14916.4	10289.6	8095.9	4641.6	4773.63	19579.9	4533.37	8483.12	4712.34	5148.85	5530.66	5206.91	C00219	HMDB0001043/HMDB0060102	Cytoplasm;Extracellular;Membrane (predicted from logP);Endoplasmic reticulum	Lipids and lipid-like molecules	Fatty Acyls	Fatty acids and conjugates	Long-chain fatty acids
M327T86	(M+Na)+	Arachidonic Acid (peroxide free)	0.44671	0.697432	0.204716	327.231	86.16	28920.4	13909	22429.7	7345.74	15205.4	16799	16874.1	10165.2	8917.74	2867.33	18782.7	15350.8	7562.52	7358.14	7362.82	C00219	HMDB0001043/HMDB0060102	Cytoplasm;Extracellular;Membrane (predicted from logP);Endoplasmic reticulum	Lipids and lipid-like molecules	Fatty Acyls	Fatty acids and conjugates	Long-chain fatty acids
M138T588	(M+H)+	Anthranilic acid (Vitamin L1)	0.503549	0.826345	0.585458	138.054	588.004	29283.9	23221.6	14873.8	42552.4	20384.9	15559.4	7013.58	25510.7	25562.2	12021.4	5269.08	45166.9	10791.3	15889	15885.7	C00108	HMDB0001123	Cytoplasm	Benzenoids	Benzene and substituted derivatives	Benzoic acids and derivatives	Aminobenzoic acids
M187T574	(M-H)-	alpha-N-Acetyl-L-glutamine	0.438586	0.55438	0.220334	187.072	574.178	4311.68	2030.54	1679.78	9210.77	3241.98	1717.6	1216.67	1433.43	3177.54	1222.71	3683.22	1569.43	3421.01	2554.89	3424.86
M279T75	(M+H)+	alpha-Linolenic acid	4.29497	1.51201	0.0764766	279.231	74.864	231036	182590	264486	56754.6	235419	518999	369021	401908	335794	391581	319299	434204	279433	281167	279433	C06427	HMDB0001388	Cytoplasm;Extracellular;Membrane (predicted from logP)	Lipids and lipid-like molecules	Fatty Acyls	Lineolic acids and derivatives	Lineolic acids and derivatives
M521T938	(2M+H)+	alpha-D-Glucose 1-phosphate	0.70299	0.547137	0.127219	521.066	937.525	21388.5	26410.1	21050.5	1521.64	11719.6	9800.99	8094.22	4583.59	15768.9	3951.96	10641.7	7236.72	2977.93	2977.69	2898.23	C00103	HMDB0001586	Cytoplasm (predicted from logP)	Organic oxygen compounds	Organooxygen compounds	Carbohydrates and carbohydrate conjugates	Monosaccharide phosphates
M281T906	(M+Na-2H)-	alpha-D-Glucose 1-phosphate	0.118997	0.716945	0.0472579	281.005	905.896	1150.05	2059.62	1613.43	1068.97	1665.71	1120.55	671.5	1268.65	1071.91	1056.12	1114.25	1039.45	1107.18	1107.37	1144.77	C00103	HMDB0001586	Cytoplasm (predicted from logP)	Organic oxygen compounds	Organooxygen compounds	Carbohydrates and carbohydrate conjugates	Monosaccharide phosphates
M339T839	(M-H)-	Alpha-D-Glucose 1,6-bisphosphate	0.325643	0.660182	0.157047	338.988	838.62	6236	10483.6	5362.49	2477.4	7457.12	3613.97	3596.2	3038.66	6921.16	2770.16	3678.49	3518	1826.85	1825.47	1930.25	C01231	HMDB0003514	Cellular Locations Not Available	Organic oxygen compounds	Organooxygen compounds	Carbohydrates and carbohydrate conjugates	Hexose phosphates
M179T553	(M-H)-	Alpha-D-Glucose	2.06588	0.520339	0.320942	179.055	552.713	61529.4	41090.4	29286	249404	38300.3	41293	36572.1	39360.1	37426.9	32421	26134.6	67910.9	22623.2	22308.5	22620.6	C00267	HMDB0003345/HMDB0061922	Cytoplasm (predicted from logP)	Organic oxygen compounds	Organooxygen compounds	Carbohydrates and carbohydrate conjugates	Hexoses
M241T739	(M-H2O-H)-	alpha-D-Galactose 1-phosphate	1.48228	0.389181	0.0136744	241.011	738.719	51608.7	42812.4	22935.1	23498.7	27981.9	14832.2	17555.2	8794.2	18343.5	5686.47	17480.4	3620.64	7529.3	7666.06	7529.85	C00446	HMDB0000645	Cytoplasm (predicted from logP)	Organic oxygen compounds	Organooxygen compounds	Carbohydrates and carbohydrate conjugates	Monosaccharide phosphates
M241T739	(M-H2O-H)-	alpha-D-Galactose 1-phosphate	1.48228	0.389181	0.0136744	241.011	738.719	51608.7	42812.4	22935.1	23498.7	27981.9	14832.2	17555.2	8794.2	18343.5	5686.47	17480.4	3620.64	7529.3	7666.06	7529.85	C00446	HMDB0000645	Cytoplasm (predicted from logP)	Organic oxygen compounds	Organooxygen compounds	Carbohydrates and carbohydrate conjugates	Monosaccharide phosphates
M537T435	(2M+H)+	Allopurinol riboside	3.12835	0.442689	0.0612069	537.167	434.992	281385	456062	181234	97834.1	145393	138001	109197	139693	136899	52866.4	107790	29010	59470.9	58483.5	59466.8		HMDB0000481	Cytoplasm;	Nucleosides, nucleotides, and analogues	Pyrazolo[3,4-d]pyrimidine glycosides		Pyrazolo[3,4-d]pyrimidine glycosides
M157T324_2	(M-H)-	Allantoin	4.5661	0.508878	0.0885097	157.036	323.574	890762	504140	236254	747808	547647	168393	232711	190532	603368	124984	208034	215352	95788.7	96574.5	98270	C01551	HMDB0000462	Cytoplasm	Organoheterocyclic compounds	Azoles	Imidazoles	Imidazoles
M157T324_2	(M-H)-	Allantoin	4.5661	0.508878	0.0885097	157.036	323.574	890762	504140	236254	747808	547647	168393	232711	190532	603368	124984	208034	215352	95788.7	96574.5	98270	C01551	HMDB0000462	Cytoplasm	Organoheterocyclic compounds	Azoles	Imidazoles	Imidazoles
M159T364	(M+H)+	Allantoin	0.483075	0.707312	0.473217	159.05	364.435	11061.6	5229.42	3734.08	30935.6	12971.4	4363.48	7071.1	5108.83	14193.8	5160.92	5849.05	10922.6	4432.5	4745.51	4434.03	C01551	HMDB0000462	Cytoplasm	Organoheterocyclic compounds	Azoles	Imidazoles	Imidazoles
M277T74_2	(M-H)-	all cis-(6,9,12)-Linolenic acid	5.37196	1.60971	0.054808	277.216	74.101	222701	296756	305368	85050.7	225587	248796	291102	478122	293686	584598	214287	366457	331200	339866	339366	C06426	HMDB0003073	Cytoplasm;Extracellular;Membrane (predicted from logP)
M277T74_2	(M-H)-	all cis-(6,9,12)-Linolenic acid	5.37196	1.60971	0.054808	277.216	74.101	222701	296756	305368	85050.7	225587	248796	291102	478122	293686	584598	214287	366457	331200	339866	339366	C06426	HMDB0003073	Cytoplasm;Extracellular;Membrane (predicted from logP)
M422T410	(2M+NH4)+	Ala-Leu	0.605466	0.323406	0.000154087	422.302	409.803	6335.39	5136.08	3754.19	7655.03	5784.08	3934.43	1809.71	1876.57	2106.75	1413.72	2117.61	1218.4	2033.51	2030.82	2197.39
M464T990	(M+H)+	Adenylsuccinic acid	0.0623233	1.07942	0.642532	464.08	990.088	500.236	976.694	980.12	537.42	885.924	678.903	959.183	748.358	997.984	632.105	1064.88	518.86	1082.1	1082.09	1079.51	C03794	HMDB0000536/HMDB0059653	Cytoplasm	Nucleosides, nucleotides, and analogues	Purine nucleotides	Purine ribonucleotides	Purine ribonucleoside monophosphates
M346T788	(M-H)-	Adenosine monophosphate (AMP)	0.553599	0.460683	0.0316064	346.055	788.145	7153.24	9956.49	4892.94	2468.11	7677.31	3532.31	1954.17	2256.66	5512.05	1890.35	2885.12	1938.99	1730.3	1730.59	1756.47	C00020	HMDB0000045	Cytoplasm;Extracellular;Mitochondria;Nucleus;Lysosome;Endoplasmic reticulum;Golgi apparatus;Peroxisome	Nucleosides, nucleotides, and analogues	Purine nucleotides	Purine ribonucleotides	Purine ribonucleoside monophosphates
M348T869	(M+H)+	Adenosine monophosphate (AMP)	0.265275	0.84867	0.0897137	348.07	869.117	13979.1	11290.9	15612.2	16532.3	18045.8	18489.3	14516.9	11869.6	14123.9	15056.4	12823.1	11342.3	19653.7	17601.8	15586.6	C00020	HMDB0000045	Cytoplasm;Extracellular;Mitochondria;Nucleus;Lysosome;Endoplasmic reticulum;Golgi apparatus;Peroxisome	Nucleosides, nucleotides, and analogues	Purine nucleotides	Purine ribonucleotides	Purine ribonucleoside monophosphates
M508T966	(M+H)+	Adenosine 5'-triphosphate (ATP)	0.0697903	1.09711	0.77091	508.001	966.322	885.749	1961.97	2168.73	579.759	1515.54	1306.83	1165.98	1920.88	3275.35	1126.73	858.12	889.077	1762.17	1763.29	1699.27	C00002	HMDB0000538	Cytoplasm;Extracellular;Mitochondria;Nucleus;Endoplasmic reticulum;Peroxisome	Nucleosides, nucleotides, and analogues	Purine nucleotides	Purine ribonucleotides	Purine ribonucleoside triphosphates
M428T905	(M+H)+	Adenosine 5'-diphosphate (ADP)	0.293971	1.01095	0.96249	428.036	904.631	8700.1	12896.6	6704.53	4618.94	5925.17	6388.58	5766.11	4990.69	10130	7437.67	5121.15	12283.5	5857.93	5639.93	5644.84	C00008	HMDB0001341	Cytoplasm;Extracellular;Mitochondria;Nucleus;Endoplasmic reticulum;Peroxisome	Nucleosides, nucleotides, and analogues	Purine nucleotides	Purine ribonucleotides	Purine ribonucleoside diphosphates
M346T747	(M-H)-	Adenosine 3'-monophosphate	0.607822	1.1634	0.756182	346.054	747.447	11072.6	23311	4132.98	1064.39	5390.94	4738.22	3383.19	9975.58	5909.3	6747.77	9752.48	22064.6	3337.52	3007.59	3287.01	C01367	HMDB0003540	Cellular Locations Not Available	Nucleosides, nucleotides, and analogues	Ribonucleoside 3'-phosphates		Ribonucleoside 3'-phosphates
M348T809	(M+H)+	Adenosine 3'-monophosphate	0.568125	1.18635	0.774339	348.07	808.829	20469.8	41044.6	9582.89	2198.6	6357.47	9442.81	3983.1	14418.1	7332.53	7729.61	19443.8	52791.9	5111.9	4986.76	5110.76	C01367	HMDB0003540	Cellular Locations Not Available	Nucleosides, nucleotides, and analogues	Ribonucleoside 3'-phosphates		Ribonucleoside 3'-phosphates
M428T976	(M+H)+	Adenosine 3',5'-diphosphate (PAP)	0.277368	1.05424	0.905685	428.036	975.769	2196.74	3043.93	1958.35	929.172	2211.41	8048.75	1687.58	4430.34	2001.57	1923.89	2137.31	7205.07	2127.41	2318.5	2131.93	C00054	HMDB0000061	Golgi apparatus	Nucleosides, nucleotides, and analogues	Purine nucleotides	Purine ribonucleotides	Purine ribonucleoside 3',5'-bisphosphates
M268T338	(M+H)+	Adenosine	0.913742	0.840619	0.390797	268.103	338.476	202842	266700	296767	96258.8	232238	165729	145369	129194	254265	127632	238435	164734	131678	135114	135034	C00212	HMDB0000050	Extracellular;Mitochondria;Lysosome	Nucleosides, nucleotides, and analogues	Purine nucleosides		Purine nucleosides
M136T332	(M+H)+	Adenine	1.19733	0.349409	0.188359	136.061	332.205	9896.4	5404.64	5549.7	75775.9	11612.9	45497	9199.89	5956.27	7954.67	9033.29	10512.3	11060.6	7973.1	5925.05	7962.61	C00147	HMDB0000034	Cytoplasm;Extracellular;Nucleus;Lysosome
M134T283	(M-H)-	Adenine	0.7762	0.260218	0.123061	134.047	283.19	4306.05	1331.95	1924.38	17808.7	1393.37	11059.2	2006.76	2701.95	1673.71	1502.83	1650.01	307.139	1531.57	1477.59	1531.72	C00147	HMDB0000034	Cytoplasm;Extracellular;Nucleus;Lysosome
M116T549	(M-H)-	Acetylglycine	0.169579	0.795954	0.322066	116.035	549.157	4281.68	3430.7	3074.14	1422.28	2773.23	1827.23	2130.12	1336.55	3721.82	1805.54	2582.23	1803.14	1184.19	1325.03	1327.08	C02055	HMDB0000532	Cytoplasm;	Organic acids and derivatives	Carboxylic acids and derivatives	Amino acids, peptides, and analogues	N-acyl-alpha amino acids
M146T378	(M+H)+	Acetylcholine	0.416477	0.826979	0.742721	146.117	377.731	36608.9	15330.3	5660.91	6032.71	3178.46	2621.57	7365.86	1632.89	20823	7874.89	9089.8	10633.1	4138.08	4210.89	4139.57	C01996	HMDB0000895	Cytoplasm;Extracellular;Nucleus	Organic nitrogen compounds	Organonitrogen compounds	Quaternary ammonium salts	Acyl cholines
M204T611	(M+H)+	Acetylcarnitine	7.65582	0.537584	0.0426587	204.123	610.714	2.61345e+06	2.38848e+06	1.64202e+06	1.01389e+06	1.32849e+06	787966	1.03112e+06	885032	900167	938471	1.18344e+06	316269	1.19049e+06	1.20019e+06	1.20019e+06	C02571	HMDB0000201	Cytoplasm;Extracellular;Membrane;Mitochondria;Endoplasmic reticulum;Peroxisome	Lipids and lipid-like molecules	Fatty Acyls	Fatty acid esters	Acyl carnitines
M262T552	(M+CH3COO)-	Acetylcarnitine	0.637995	0.431932	0.027875	262.129	551.677	12817.4	10989	8435.99	4981.26	4465.62	2995.55	3193.86	3509.01	3439.39	3247.59	4343.62	1567.37	3370.18	3362.22	3480.32	C02571	HMDB0000201	Cytoplasm;Extracellular;Membrane;Mitochondria;Endoplasmic reticulum;Peroxisome	Lipids and lipid-like molecules	Fatty Acyls	Fatty acid esters	Acyl carnitines
M139T804	(M-H)-	Acetyl phosphate	0.886494	1.23485	0.390974	138.979	804.095	12472	22381.7	23665.3	3735.18	24332.9	11611.8	27661.2	14349.5	24386.5	13031.7	16378.4	25453.7	12803.7	14340.1	15211.8	C00227	HMDB0001494	Cellular Locations Not Available	Organic acids and derivatives	Organic phosphoric acids and derivatives	Phosphate esters	Acyl monophosphates
M180T57	(M-H)-	Acamprosate	0.308632	0.951213	0.737062	180.033	57.073	12999.1	13428.1	9977.02	5768.31	13056.3	10720.5	12821.3	8964.19	12143.7	12209.9	10125.1	6467.65	9525.56	9162.4	9530.07		HMDB0014797	Membrane;	Organic acids and derivatives	Organic sulfonic acids and derivatives	Organosulfonic acids and derivatives	Organosulfonic acids
M313T186	(M-H)-	9,10-DiHOME	0.609325	1.00711	0.972687	313.237	186.271	23652.3	23731.5	20103.8	18461	26220.3	5148.19	10816.5	21177.3	25834.9	13686.9	22259.4	24376.8	8245.44	8236.1	8943.84
M295T117	(M-H)-	9(S)-HODE	3.62306	1.33426	0.46882	295.227	117.216	257827	193666	148623	18011.4	100172	684088	339040	291022	280534	394596	149412	416547	187922	187755	159039
M333T360	(M-H)-	8-iso-Prostaglandin A2	0.283197	0.906678	0.851152	333.205	360.236	2163.8	891.101	1625.02	636.989	2717.1	9309.62	2056.05	1133.13	3980.06	2220.6	2363.9	3971.34	1242.81	1244.01	1308.93	C05953	HMDB0002752	Extracellular;Membrane (predicted from logP)	Lipids and lipid-like molecules	Fatty Acyls	Eicosanoids	Prostaglandins and related compounds
M401T54_2	(M+H)+	7-Oxocholesterol	2.50569	1.88338	0.117843	401.34	53.548	48765.4	59646.8	34889.8	26809.5	52301.9	46088.2	52902	62081	36138.2	111358	58434.2	184777	51482.7	50347.5	51731.3
M275T912	(M-H)-	6-Phospho-D-gluconate	0.122094	0.753506	0.381565	275.017	911.981	3864.13	6482.08	1999.61	1420.99	3501.52	3007.8	2730.76	411.593	4540.34	2327.73	2153.4	3114.35	1685.74	1676.08	1274.89	C00345	HMDB0001316	Endoplasmic reticulum	Organic oxygen compounds	Organooxygen compounds	Carbohydrates and carbohydrate conjugates	Monosaccharide phosphates
M337T918	(M+CH3COO+2H)+	6-Phospho-D-gluconate	0.114467	0.837168	0.633125	337.046	918.214	3458.29	2779.91	925.354	3339.7	515.214	1529.8	1958.27	2797.6	690.227	786.42	3320.16	952.32	3233.04	3232.9	3175.15	C00345	HMDB0001316	Endoplasmic reticulum	Organic oxygen compounds	Organooxygen compounds	Carbohydrates and carbohydrate conjugates	Monosaccharide phosphates
M369T312	(M-H)-	6-Keto-PGF1a	1.40103	0.403891	0.0327911	369.227	312.461	27899.5	68786.3	52211.7	10850.5	34275.2	24467.2	14202.6	7863.33	14637.8	14225.3	13305.9	24011.2	13581.8	13405.3	16352.2
M369T312	(M-H)-	6-Keto-PGF1a	1.40103	0.403891	0.0327911	369.227	312.461	27899.5	68786.3	52211.7	10850.5	34275.2	24467.2	14202.6	7863.33	14637.8	14225.3	13305.9	24011.2	13581.8	13405.3	16352.2
M198T666	(M-2H+3Na)+	6-Aminocaproic acid	0.302457	0.698965	0.254129	198.052	666.407	6340.16	4110.48	6970.74	3015.44	2828.17	1921.5	4382.01	2218.78	2946.66	1028.16	5106.21	1922.66	1265.66	1621.29	1244.26
M199T621	(M-H2O-H)-	5-L-Glutamyl-L-alanine	0.508842	0.15312	0.338068	199.07	621.335	1268.01	27711.8	953.552	1103.8	457.14	516.138	280.491	1412.82	2271.87	488.995	258.571	188.697	287.775	287.77	280.605	C03740	HMDB0006248	Extracellular	Organic acids and derivatives	Carboxylic acids and derivatives	Amino acids, peptides, and analogues	Dipeptides
M190T462	(M-H)-	5-Hydroxyindoleacetate	0.498881	0.404641	0.0630315	190.05	461.819	5811.48	9656.91	2486.3	1418.31	2143.85	6067.1	2284.28	2408.8	1832.51	1942.19	810.741	1883.06	1125.71	1153.58	1022.84	C05635	HMDB0000763	Cytoplasm;Mitochondria	Organoheterocyclic compounds	Indoles and derivatives	Indolyl carboxylic acids and derivatives	Indole-3-acetic acid derivatives
M182T61	(M-H)-	4-Pyridoxic acid	1.31095	0.527239	0.255012	182.046	61.452	115463	56927.8	17478.2	66348.1	40418.8	9928.21	14602.3	15448.5	88141.8	6359.57	13003.8	24076.7	5267.63	5158	5155.19	C00847	HMDB0000017	Cytoplasm;Extracellular	Organoheterocyclic compounds	Pyridines and derivatives	Pyridinecarboxylic acids and derivatives	Pyridinecarboxylic acids
M361T51_1	(M+CH3COO+2H)+	4-Oxoretinol	0.189754	0.637709	0.153449	361.236	51.3615	9367.86	11482	1886.58	4485.47	11218.9	7274.72	7433.44	2817.71	2201.39	6631.76	5741.59	4327.27	3187.02	3238.61	3688.35	C16683	HMDB0012329	Extracellular;Membrane	Lipids and lipid-like molecules	Prenol lipids	Retinoids	Retinoids
M137T58	(M-H)-	4-Hydroxybenzoate	0.347317	1.01683	0.916787	137.024	57.58	6531.7	6011.29	6090.69	2135.38	4096.11	4110.67	5911.42	4690.66	5262.08	3668.23	5380.41	4550.78	4581.21	4843.49	4829.78	C00156	HMDB0000500	Cytoplasm;Mitochondria	Benzenoids	Benzene and substituted derivatives	Benzoic acids and derivatives	Hydroxybenzoic acid derivatives
M131T584	(M-H)-	3-Ureidopropionate	0.401337	0.341585	0.10902	131.046	583.586	4426.21	1936.81	605.511	5829.62	1363.15	657.819	256.385	820.521	2157.97	531.045	658.887	637.185	562.48	591.093	564.191	C02642	HMDB0000026/HMDB0062812	Cytoplasm	Organic acids and derivatives	Organic carbonic acids and derivatives	Ureas	Ureas
M244T804	(M+CH3COO)-	3-Phosphoserine	0.16795	0.905533	0.649306	244.022	803.607	1770.62	3444.91	2326.65	744.662	2012.09	1975.17	2674.1	1962.28	2016.28	1667.57	1146.99	1647.39	1312.36	1392.23	1312.85	C01005	HMDB0000272/HMDB0001721	Cytoplasm (predicted from logP)	Organic acids and derivatives	Carboxylic acids and derivatives	Amino acids, peptides, and analogues	L-alpha-amino acids/Alpha amino acids
M185T1124	(M-H)-	3-Phospho-D-glycerate	0.145738	1.06601	0.814126	184.986	1123.67	1212.25	464.92	1249.4	1113.65	457.673	882.527	1234.26	1422.01	277.167	1067	437.386	1297.75	1226.49	1242.13	980.27	C00197	HMDB0060180	Cellular Locations Not Available	Organic oxygen compounds	Organooxygen compounds	Carbohydrates and carbohydrate conjugates	Sugar acids and derivatives
M324T766	(M-2H+3Na)+	3'-O-methylcytidine	0.27342	1.50616	0.348624	324.054	765.88	468.786	1098.31	988.155	843.919	671.375	1198.01	808.873	803.245	797.434	1374.41	695.852	3455.48	658.511	650.126	572.826
M263T38	(M-H)-	3-Methoxy-4-Hydroxyphenylglycol Sulfate	1.40847	0.390829	0.0472443	263.022	37.704	70810.3	23750.1	14689.7	61356.5	37753.6	16116.2	21019.8	13624.9	15447	3353.89	14058.2	20228.1	6584.2	6873.48	6871.91		HMDB0003332	Cytoplasm;	Benzenoids	Phenols	Methoxyphenols	Methoxyphenols
M263T38	(M-H)-	3-Methoxy-4-Hydroxyphenylglycol Sulfate	1.40847	0.390829	0.0472443	263.022	37.704	70810.3	23750.1	14689.7	61356.5	37753.6	16116.2	21019.8	13624.9	15447	3353.89	14058.2	20228.1	6584.2	6873.48	6871.91		HMDB0003332	Cytoplasm;	Benzenoids	Phenols	Methoxyphenols	Methoxyphenols
M188T189	(M-H)-	3-Indolepropionic acid	0.450003	1.22395	0.553538	188.071	188.594	4912.76	8147.05	13528.3	10114.3	14236.4	4341.05	7535.41	5307.34	25163	10971.2	10285.3	8397.76	3352.6	3123.05	3347.6
M139T645	(M+Na-2H)-	3-Hydroxyisovaleric acid	0.249442	0.674607	0.188047	139.036	645.478	4109.51	3157.86	3341.63	1184.54	2213.04	1361.51	2790.86	1746.25	2208.5	739.746	2188.95	693.133	1597.48	1636.61	1667.81		HMDB0000754	Cytoplasm (predicted from logP);	Lipids and lipid-like molecules	Fatty Acyls	Fatty acids and conjugates	Hydroxy fatty acids
M153T39	(M-H2O-H)-	3-Dehydroshikimic acid	0.283816	1.16827	0.714192	153.019	38.705	5344.93	4976.66	1120.36	2618.51	3930.28	1420.28	2972.76	2155.69	9895.46	3195.3	1654.2	2803.84	2197.8	2194.58	1903.07
M141T644	(M-H2O-H)-	2-Oxoadipic acid	18.767	1.02419	0.860023	141.017	643.645	1.13038e+07	1.8055e+07	1.28613e+07	1.21092e+07	1.31678e+07	6.19902e+06	1.27352e+07	1.32829e+07	1.41871e+07	1.25743e+07	1.02702e+07	1.24292e+07	9.63074e+06	9.90172e+06	9.92879e+06	C00322	HMDB0000225	Mitochondria	Organic acids and derivatives	Keto acids and derivatives	Medium-chain keto acids and derivatives	Medium-chain keto acids and derivatives
M281T262	(M-H)-	2'-O-methylinosine	0.388772	1.01377	0.956196	281.089	261.868	8264.16	8078.73	4807.73	10541.5	5017.07	4373.1	5448.29	2819.46	10291.4	4073.23	10363.3	8652.41	3403.72	3428.97	3763.33
M364T875	(M-2H+3Na)+	2'-O-methylguanosine	0.347842	1.42297	0.537092	364.064	875.305	1839.21	7413.45	2027.36	2583.77	920.637	2549.01	2477.39	3209.09	1285.22	1190.26	4445.87	12057.1	2214.77	2214.84	2101.66
M258T324	(M+H)+	2'-O-methylcytidine	0.161612	0.780869	0.138352	258.115	324.318	2764.86	5015.12	2263.55	5009.52	4154.03	4210.51	3812.02	2514.37	3445.5	2313.95	3478.93	2721.28	2812.37	2977.71	2978.71
M298T395	(M+H)+	2-Methylguanosine	0.892602	0.50451	0.0636778	298.114	394.625	24491.9	23722.2	6510.65	38617.2	21740.6	17116.8	8816.36	5330.36	25509.1	6827.66	8217.04	11995.4	3837.86	4037.48	4035.26		HMDB0005862	Cellular Locations Not Available	Nucleosides, nucleotides, and analogues	Purine nucleosides		Purine nucleosides
M296T351	(M-H)-	2-Methylguanosine	0.429961	0.606828	0.111325	296.099	350.769	9960.44	6620.45	2933.74	10262.2	7222.66	4626.49	3712.42	2240.01	8971.88	2257.91	3419.52	4658.08	1363.42	1088.6	1365.85		HMDB0005862	Cellular Locations Not Available	Nucleosides, nucleotides, and analogues	Purine nucleosides		Purine nucleosides
M246T481	M+	2-Methylbutyroylcarnitine	1.2901	0.945239	0.922728	246.169	480.733	412121	99409.8	190773	174954	248741	3661.89	370976	16706.6	13049.1	2754	501938	162374	123803	121672	121673
M135T182	(M-H)-	2-Methylbenzoic acid	0.982894	1.20332	0.412192	135.045	182.468	1402.18	25313.5	36887.4	35651.7	25527.2	18614.4	25107.6	32057.5	37086.2	25565.6	24542.5	28192	14969.5	14514.5	14493.6
M117T246	(M-H)-	2-Methyl-3-hydroxybutyric acid	1.91111	0.492519	0.166293	117.055	246.308	176801	258413	46809.5	46154.4	87964.6	40246.8	77174.8	67399.8	41896.8	63668.9	34373.8	38770.1	34710.8	36328.9	36161.1		HMDB0000354	Cytoplasm (predicted from logP);	Lipids and lipid-like molecules	Fatty Acyls	Fatty acids and conjugates	Hydroxy fatty acids
M152T525	(M+H)+	2-Hydroxyadenine	0.47488	0.545648	0.0609637	152.056	525.357	9796.71	14767.5	6339.26	5202.14	5819.33	4796.49	3076.53	3797.6	6902.78	3110.73	4350.5	4255.34	2753.14	2646.85	2646.51		HMDB0000403	Cytoplasm;	Organoheterocyclic compounds	Imidazopyrimidines	Purines and purine derivatives	6-aminopurines
M309T70_2	(M-H)-	2E-Eicosenoic acid	2.33121	1.80461	0.0624965	309.279	69.677	39555.8	39648.1	34272.7	27833	24191.4	37765.4	42046.4	64413.6	45176.9	80117.8	23995	111067	42040.8	42621.7	42759.4
M309T70_2	(M-H)-	2E-Eicosenoic acid	2.33121	1.80461	0.0624965	309.279	69.677	39555.8	39648.1	34272.7	27833	24191.4	37765.4	42046.4	64413.6	45176.9	80117.8	23995	111067	42040.8	42621.7	42759.4
M227T203	(M-H)-	2'-Deoxyuridine	1.18791	0.576463	0.132298	227.067	202.693	99777.3	76498.1	34122.6	46624.9	23726.1	24535.7	18346.5	26760.1	39208.5	25485.6	41525.7	24659	17035.1	17600.1	17564.4	C00526	HMDB0000012	Extracellular;Mitochondria;Nucleus	Nucleosides, nucleotides, and analogues	Pyrimidine nucleosides	Pyrimidine 2'-deoxyribonucleosides	Pyrimidine 2'-deoxyribonucleosides
M389T915	(M+CH3CN+H)+	2'-Deoxyguanosine 5'-monophosphate (dGMP)	0.711764	0.469126	0.0949256	389.104	915.106	17115.9	25506.7	10542.8	2253.42	9201.35	9108.83	6223.86	2617.09	8449.95	3328.47	10704.1	3264.68	3131.51	3131.35	3216.2	C00362	HMDB0001044	Cytoplasm;Mitochondria;Lysosome	Nucleosides, nucleotides, and analogues	Purine nucleotides	Purine deoxyribonucleotides	Purine 2'-deoxyribonucleoside monophosphates
M277T887	(M-H)-	2-C-Methyl-D-erythritol 2,4-cyclodiphosphate	0.169091	0.764788	0.446268	276.988	886.503	2920.33	2362.01	1645.21	451.036	1316.48	511.699	886.766	727.482	2146.47	871.423	1131.26	1277.82	1069.23	918.469	1069.94
M365T38	(M+H-2H2O)+	25-hydroxyvitamin D3	1.11514	0.679324	0.106458	365.32	38.072	91613	101970	48169.7	39593.6	67295.6	39941.6	43133.9	55367.4	54073.2	40008.8	42390.2	29000.9	40279.9	40015.1	39532.3	C01561	HMDB0003550	Cytoplasm;Extracellular;Membrane (predicted from logP);Mitochondria	Lipids and lipid-like molecules	Steroids and steroid derivatives	Vitamin D and derivatives	Vitamin D and derivatives
M369T270	(M-H)-	20-hydroxy-PGF2a	0.5797	0.811298	0.555887	369.226	270.165	101646	42431.2	38497.8	21803.6	39666.3	74967.7	41874.7	23971.9	33408.1	28840.5	32528.2	98190.6	30695.2	31145.3	26043.5
M303T74	(M+H-H2O)+	20-Hydroxyarachidonic acid	1.35654	0.992059	0.959574	303.232	73.781	574062	560395	856170	314210	673693	688131	783105	500241	741897	423185	545488	643629	409539	409528	411698
M194T906	M+	2,5-Dihydroxycinnamic acid methyl ester	0.619425	0.37782	0.104611	194.057	905.863	6558.79	10438.6	6921.78	25520.2	4127.4	4060.49	4499.26	4165.5	4869.56	2860.53	2964.78	2413.03	26150.8	26090.5	4796.2		HMDB0061686	Cellular Locations Not Available	Phenylpropanoids and polyketides	Cinnamic acids and derivatives	Hydroxycinnamic acids and derivatives	Hydroxycinnamic acids
M133T185	(M-H)-	2,3-Dihydroxy-3-methylbutyric acid	1.29801	0.15117	0.0654608	133.051	184.704	23138.8	8023.83	6875.28	50387.8	10968.1	4808.91	1452.95	1804	2511.24	2900.06	3112.61	3971.48	2142.43	2123.67	1129.93	C04272	HMDB0012141	Cellular Locations Not Available	Lipids and lipid-like molecules	Fatty Acyls	Fatty acids and conjugates	Hydroxy fatty acids
M133T185	(M-H)-	2,3-Dihydroxy-3-methylbutyric acid	1.29801	0.15117	0.0654608	133.051	184.704	23138.8	8023.83	6875.28	50387.8	10968.1	4808.91	1452.95	1804	2511.24	2900.06	3112.61	3971.48	2142.43	2123.67	1129.93	C04272	HMDB0012141	Cellular Locations Not Available	Lipids and lipid-like molecules	Fatty Acyls	Fatty acids and conjugates	Hydroxy fatty acids
M524T1222	(M+H)+	1-Stearoyl-sn-glycerol 3-phosphocholine	0.0449328	1.00789	0.984356	524.37	1221.9	590.066	3279.01	941.171	1339.45	942.213	1300.14	1291.68	399.234	2788.5	700.215	2304.33	974.347	1136.73	991.749	949.317
M341T399	(M+H-H2O)+	1-Stearoyl-sn-glycerol	1.49046	0.400292	0.0575177	341.304	398.808	14555.1	15914.6	40461.7	24733.1	69484.3	62995.7	9578.49	4422.64	25606.6	4359.74	27959.2	19397.8	5994.89	6256.31	6241.19
M341T382	(M+H-H2O)+	1-Stearoyl-rac-glycerol	0.789481	1.36376	0.304649	341.304	381.784	17981.1	20608.9	16137.5	15679	15956.7	21372.5	53955.9	20991	20557.5	15791.6	18624.2	17005.7	18726	24165.1	19181.9
M811T259	(M+Na)+	1-Stearoyl-2-oleoyl-sn-glycerol 3-phosphocholine (SOPC)	7.06788	1.98258	0.0569266	810.597	259.33	118954	160522	335832	418821	442791	478517	616823	523970	404175	1.25271e+06	334876	744254	607773	537530	527052	C00157	HMDB0000564/HMDB0007878/HMDB0007879/HMDB0007880/HMDB0007882/HMDB0007884/HMDB0007886/HMDB0007887/HMDB0007897/HMDB0007898/HMDB0007911/HMDB0007912/HMDB0007913/HMDB0007914/HMDB0007936/HMDB0007937/HMDB0007938/HMDB0007939/HMDB0007940/HMDB0007958/HMDB0007959/HMDB0007960/HMDB0007961/HMDB0007964/HMDB0007966/HMDB0007967/HMDB0007981/HMDB0007982/HMDB0007983/HMDB0007984/HMDB0007985/HMDB0008002/HMDB0008003/HMD…	Cytoplasm;Extracellular;Membrane	Lipids and lipid-like molecules	Glycerophospholipids	Glycerophosphocholines	Phosphatidylcholines//1-acyl,2-(1Z-alkenyl)-glycerophosphocholines
M482T382	(M+H)+	1-Stearoyl-2-hydroxy-sn-glycero-3-phosphoethanolamine	4.18303	1.90528	0.265924	482.324	381.784	362156	178125	63752	60530	63297.5	51333.8	538980	461061	119872	258387	55756.3	50524.2	354314	360344	360345
M524T387_4	(M+H)+	1-Stearoyl-2-hydroxy-sn-glycero-3-phosphocholine	28.4278	0.447789	0.065713	524.37	387.175	5.32713e+06	5.2024e+06	1.91275e+07	1.05923e+07	1.80841e+07	2.00604e+07	3.00031e+06	2.49473e+06	1.1699e+07	1.29334e+06	1.28201e+07	3.79638e+06	1.49712e+06	1.59194e+06	1.58934e+06
M628T393	(M+H-H2O)+	1-Stearoyl-2-arachidonoyl-sn-glycerol	0.310083	0.850419	0.567626	627.533	393.241	46683.8	34119.3	14333.5	18250.4	37668.9	26711.9	10641.5	25129.2	17869.6	23664.2	22870.1	51002.5	18327.7	22401.3	18235.4	C00165	HMDB0007098/HMDB0007099/HMDB0007100/HMDB0007101/HMDB0007103/HMDB0007108/HMDB0007112/HMDB0007131/HMDB0007132/HMDB0007156/HMDB0007166/HMDB0007170/HMDB0007223/HMDB0007224/HMDB0007248/HMDB0007257/HMDB0007398	Extracellular;Membrane	Lipids and lipid-like molecules	Glycerolipids/Fatty Acyls	Diradylglycerols/Lineolic acids and derivatives	1,2-diacylglycerols/Lineolic acids and derivatives
M496T376	(M+H)+	1-Palmitoyl-sn-glycero-3-phosphocholine	9.29467	0.969413	0.954044	496.339	376.107	4.08368e+06	3.52376e+06	679546	354758	923096	420996	3.26194e+06	3.01352e+06	563181	1.78875e+06	515265	537734	2.45605e+06	2.4561e+06	2.4413e+06
M497T377_2	(M+H)+	1-Palmitoyllysophosphatidylcholine	4.8138	0.789168	0.69671	497.342	377.345	1.02946e+06	1.83516e+06	224019	118061	247544	139345	840663	753925	178702	726348	190122	146187	646614	641120	641122
M313T47	(M+H-H2O)+	1-Palmitoylglycerol	0.89129	0.719645	0.291001	313.273	47.177	191756	206512	43689.7	138764	72176.7	73677.6	60347.4	121320	53631.4	96842.6	121341	69394.1	127658	127554	112303
M748T75	(M-H)-	1-Palmitoyl-2-oleoyl-phosphatidylglycerol	0.445304	0.769962	0.342729	747.516	74.699	76956.8	38130.9	50988.3	80323.7	18486.9	50319.8	9448.7	56059.3	31782.7	46687.6	59264.4	39454.1	58428.8	56117.9	55997.3
M454T405	(M+H)+	1-Palmitoyl-2-hydroxy-sn-glycero-3-phosphoethanolamine	3.23892	0.570944	0.260404	454.292	405.013	51851.4	54120	276661	206015	337081	254880	50036.7	5611.17	271380	6784.86	272513	67735.7	55229.2	66144.7	55234.6
M452T329	(M-H)-	1-Palmitoyl-2-hydroxy-sn-glycero-3-phosphoethanolamine	3.03863	0.207125	0.108815	452.277	329.239	291618	276003	42096	17357	49743.6	28872.7	28313.8	18971.7	38957.5	17925.4	32242.6	9754.57	15649	1733.14	15371
M409T437	(M-H)-	1-Palmitoyl Lysophosphatidic Acid	0.227828	0.65947	0.101018	409.234	437.382	1975.42	4589.25	2635.15	1658.33	2335.16	2026.26	1565.86	1859.62	2310.31	1340.79	2033.86	926.422	1455.23	1456.75	1488.43
M510T394	(M+H)+	1-O-Octadecyl-sn-glyceryl-3-phosphorylcholine	1.73965	0.436992	0.0527956	510.39	394.148	15592.9	34590.9	92122	64763.3	57851.1	39792.5	9864.57	11710.2	27831.2	1430.22	46897.9	35423	6838.49	7337.44	7323.63
M522T349	(M+H)+	1-Oleoyl-sn-glycero-3-phosphocholine	6.64963	0.0684606	0.248029	522.354	349.104	3.52899e+06	997233	8514.09	4243.63	12069.8	10588.1	163552	57862	6828.65	70446.4	11150.8	2452.77	91399.5	91356.5	97998.3
M435T430	(M-H)-	1-Oleoyl-L-.alpha.-lysophosphatidic acid	0.738833	0.519748	0.306211	435.25	429.764	5316.34	75500.5	14063.7	15024.4	24718.8	12764.5	16380.7	22451.6	17094.2	7304.57	11971.7	1401.86	10199.3	9032.47	10056.8
M419T489	(M+H-H2O)+	1-Oleoyl-L-.alpha.-lysophosphatidic acid	0.32498	0.616803	0.170164	419.255	488.562	3227.01	8514.11	5730.62	9323.18	4729.53	2484.44	4626.04	7153.03	3299.07	1800.67	3563.41	534.551	2846.75	2846.7	2907.18
M595T353	(M-H+2Na)+	1-O-(cis-9-Octadecenyl)-2-O-acetyl-sn-glycero-3-phosphocholine	0.403094	0.893122	0.699842	595.37	352.937	32011.3	16712.4	14054.6	6874.54	13429.5	12241.2	9814.09	21189.4	14647	21524.7	6942.61	11017.8	9783.35	8732.65	8468.66
M468T402	(M+H)+	1-Myristoyl-sn-glycero-3-phosphocholine	1.83086	0.486169	0.211551	468.308	401.557	30687.5	37906.6	190543	35948.4	142627	56316.6	16325.1	1118.21	71998.3	1505.92	87898.3	61336.1	7774.61	7827.35	7826.41
M137T602	M+	1-Methylnicotinamide	0.553987	1.87487	0.176451	137.07	602.153	5186.57	6216.35	2472.55	3234.22	3493.62	2432.28	3655.37	5912.18	9122.44	2729.21	4438.36	17331.2	2834.51	2847.81	2834.53	C02918	HMDB0000699	Cytoplasm;Extracellular	Organoheterocyclic compounds	Pyridines and derivatives	Pyridinecarboxylic acids and derivatives	Nicotinamides
M126T669	(M+H)+	1-Methylhistamine	0.183446	0.790412	0.448773	126.101	669.346	4164.85	930.551	2982.22	2480.39	2028.17	2858.6	1829.15	1002.99	2797.17	555.255	4124.74	1898.45	1172.76	1289.96	1162.58	C05127	HMDB0000898	Cytoplasm	Organic nitrogen compounds	Organonitrogen compounds	Amines	2-arylethylamines
M504T398	(M+H)+	1-Eicosatrienoyl-sn-glycero-3-phosphoethanolamine	1.31633	0.634153	0.235357	504.304	398.45	20205.8	24999.7	52954	38511.6	77579.7	68632.6	18671.6	5320.68	44091	6525.31	66464.8	38318	13672.9	15032.9	14802.9
M224T566	(M+CH3COO+2H)+	1-Deoxynojirimycin	0.48283	0.512001	0.447411	224.112	565.613	6696.43	3794.75	4662.14	1946.62	8667.79	53062.2	7293.86	3186.98	10774.6	6661.3	5114.49	7329.8	3828.28	4069.89	3827.66	C16843	HMDB0035359	Cytoplasm;Extracellular	Organoheterocyclic compounds	Piperidines		Piperidines
M84T792	(M+H-H2O)+	1-Aminocyclopropanecarboxylic acid	0.150639	0.848118	0.269168	84.0433	791.751	12384.3	14104.9	10005.5	8268.41	7894.79	7748.54	7782.37	6157.45	11240.3	7388.71	9579.36	9083.7	4765.88	4892.89	4765.22	C01234	HMDB0036458	Cytoplasm;Extracellular	Organic acids and derivatives	Carboxylic acids and derivatives	Amino acids, peptides, and analogues	Alpha amino acids
M295T75	(M+Na)+	16-Hydroxypalmitic acid	1.7933	1.11237	0.685194	295.226	74.605	137659	119067	68732.8	25915.9	90201.3	171413	99776	110402	67727.6	130333	83842.3	189789	80387.3	79565.2	80388.7	C18218	HMDB0006294	Cytoplasm;Extracellular;Membrane	Lipids and lipid-like molecules	Fatty Acyls	Fatty acids and conjugates	Long-chain fatty acids
M349T80	(M-H)-	15-keto-Prostaglandin E2	0.891152	1.24016	0.325205	349.2	79.644	22580.9	19662.8	15661.2	2931.27	9912.99	24160.3	17191.5	13106.7	21578	20950.2	21104.5	23772.1	12366.8	12095.7	12091.2
M315T180	(M-H)-	15-Deoxy-delta-12,14-PGJ2	1.31113	0.736703	0.493223	315.196	180.448	192714	49361.3	208149	111421	199825	251340	110106	55416	385417	31545	128582	35074.4	30498.5	29032.5	31813.8	C14717	HMDB0005079	Extracellular;Membrane	Lipids and lipid-like molecules	Fatty Acyls	Eicosanoids	Prostaglandins and related compounds
M293T110	(M-H)-	13-OxoODE	0.766441	1.10036	0.734525	293.211	109.94	20477.9	18642.7	16024.2	919.75	24881.9	30244	13015.5	10265.3	28784.8	24305.3	15941.3	30037.3	11246.4	11700.3	11252.5
M335T181	(M+H)+	13,14-Dihydro-15-ketoprostaglandin A2	0.839205	0.738615	0.556998	335.221	180.991	40048.9	37075.1	102182	25102.8	237677	82656.9	102212	51373.8	132890	8849.85	24423.1	67833.3	40967	44575.3	44580.7
M353T71	(M+H)+	13,14-Dihydro-15-keto-PGE2	0.375554	0.719742	0.507546	353.232	70.658	8822.99	8754.62	8118.71	4909.55	6511.62	32551.1	1108.59	7256.55	16748.7	8211.11	6074.99	10743.4	5475.88	5610.89	4832.46	C04671	HMDB0002776/HMDB0012481	Extracellular;Membrane (predicted from logP);Membrane	Lipids and lipid-like molecules	Fatty Acyls	Eicosanoids	Prostaglandins and related compounds
M301T51	(M+H-H2O)+	12-oxo-ETE	0.224951	0.768613	0.25603	301.215	51.285	32340.2	37693.1	21977.6	6704.3	27702.1	20724.4	18834.7	15561.6	16289.5	18804	16922.6	26682.6	11062.6	11790	11058.6
M787T173	(M+H)+	1,2-dioleoyl-sn-glycero-3-phosphatidylcholine	3.00087	1.85233	0.0356092	786.599	172.605	69336.1	80713.1	110712	155254	183935	147822	164995	352520	146924	239113	342832	138734	170197	162563	162537
M165T549	(M-H)-	1,2-Benzenedicarboxylic acid	2.77818	0.0142235	0.182025	165.019	548.997	355816	161964	1561.76	859.999	905.972	1172.8	2940.21	1094.26	766.73	830.865	628.378	1168.24	903.025	900.864	978.763
M149T49	(M+H-H2O)+	1,2-Benzenedicarboxylic acid	0.652319	0.70934	0.215693	149.022	49.428	86316.6	54585	28960.3	44106.8	26634.2	28736.6	28599.4	46219.9	31849	30135.3	26913.4	27336.1	34206.3	31949.4	31830.4
M276T909	(M+H)+	.gamma.-L-Glu-.epsilon.-L-Lys	0.456484	0.53083	0.0868381	276.155	908.582	5986.48	11203.3	5481.01	18749.9	6289.09	6538.72	3417.91	4388.39	3657.57	6125.81	3534.17	7672.85	3676.76	3676.67	3833.05
M147T723_2	(M-H)-	(S)-2-Hydroxyglutarate	3.70063	0.361334	0.0106686	147.03	723.211	142298	205462	104153	315443	171733	99424.4	67038.6	58072.3	91926.3	37761.6	101585	18865.4	33762.4	36335.4	36240.4	C03196	HMDB0000694	Cytoplasm (predicted from logP);Mitochondria	Organic acids and derivatives	Hydroxy acids and derivatives	Short-chain hydroxy acids and derivatives	Short-chain hydroxy acids and derivatives
M147T723_2	(M-H)-	(S)-2-Hydroxyglutarate	3.70063	0.361334	0.0106686	147.03	723.211	142298	205462	104153	315443	171733	99424.4	67038.6	58072.3	91926.3	37761.6	101585	18865.4	33762.4	36335.4	36240.4	C03196	HMDB0000694	Cytoplasm (predicted from logP);Mitochondria	Organic acids and derivatives	Hydroxy acids and derivatives	Short-chain hydroxy acids and derivatives	Short-chain hydroxy acids and derivatives
M327T70_4	(M-H)-	(4Z,7Z,10Z,13Z,16Z,19Z)-4,7,10,13,1 6,19-Docosahexaenoic acid	9.76988	0.716331	0.0887619	327.232	70.337	6.98372e+06	7.71872e+06	6.96605e+06	4.37986e+06	6.53283e+06	4.56816e+06	5.34579e+06	3.49409e+06	6.22542e+06	3.2314e+06	6.38464e+06	1.92988e+06	3.87476e+06	3.88185e+06	4.00117e+06	C06429	HMDB0002183	Cytoplasm;Extracellular;Membrane	Lipids and lipid-like molecules	Fatty Acyls	Fatty acids and conjugates	Very long-chain fatty acids
M327T70_4	(M-H)-	(4Z,7Z,10Z,13Z,16Z,19Z)-4,7,10,13,1 6,19-Docosahexaenoic acid	9.76988	0.716331	0.0887619	327.232	70.337	6.98372e+06	7.71872e+06	6.96605e+06	4.37986e+06	6.53283e+06	4.56816e+06	5.34579e+06	3.49409e+06	6.22542e+06	3.2314e+06	6.38464e+06	1.92988e+06	3.87476e+06	3.88185e+06	4.00117e+06	C06429	HMDB0002183	Cytoplasm;Extracellular;Membrane	Lipids and lipid-like molecules	Fatty Acyls	Fatty acids and conjugates	Very long-chain fatty acids
M146T749	M+	(3-Carboxypropyl)trimethylammonium cation	1.02588	0.857956	0.137905	146.117	748.548	805773	543114	711032	602985	699488	618809	614602	541970	553556	530078	750940	424551	665228	665410	677861
M319T78_1	(M-H)-	(+-)12-HETE	5.8153	1.13828	0.526421	319.227	78.029	743229	771024	1.80984e+06	459081	1.28416e+06	1.46039e+06	1.47947e+06	941945	1.53019e+06	1.12204e+06	1.10374e+06	1.25299e+06	797306	816315	816316
M524T366			23.6625	0.373711	0.263028	524.37	366.193	3.02315e+07	3.06412e+07	3.13302e+06	585543	3.84351e+06	1.58245e+06	9.85993e+06	8.19635e+06	2.35964e+06	4.37936e+06	616461	754497	8.57011e+06	8.8396e+06	8.83917e+06
M269T692			18.6523	1.13109	0.430722	268.998	692.472	1.08453e+07	1.74336e+07	4.51913e+06	1.52732e+07	13343035	1.3868e+07	1.21574e+07	1.59923e+07	1.44444e+07	14632876	1.15546e+07	1.63691e+07	1.10933e+07	1.10601e+07	1.1088e+07
M258T770_1			17.1728	0.708439	0.0368298	258.11	770.361	1.52857e+07	1.8392e+07	13302447	1.06765e+07	1.21282e+07	1.16264e+07	1.11787e+07	1.11238e+07	1.18977e+07	8.11525e+06	1.09066e+07	4.45282e+06	8.76395e+06	8.68712e+06	8728117
M433T693_2			16.7258	1.20807	0.450944	433.004	692.919	7.29297e+06	3.02712e+06	4.92896e+06	1.20339e+07	6.33544e+06	1.0511e+07	3.60178e+06	6.78773e+06	1.10084e+07	1.12175e+07	8.09921e+06	1.25969e+07	5.07337e+06	6.37482e+06	6.37853e+06
M281T72_3			15.7011	1.31469	0.048443	281.248	72.175	1.96334e+06	3.34468e+06	3.95014e+06	2.19062e+06	3.73748e+06	4.07628e+06	4.23888e+06	4.10777e+06	4.41814e+06	5.05755e+06	3.16605e+06	4.3359e+06	4.04956e+06	4.05822e+06	4.19054e+06
M515T771_4			15.4106	0.519155	0.0282215	515.212	770.93	6.35754e+06	9.19905e+06	5.14466e+06	3.30213e+06	4.37211e+06	4.1942e+06	3.67025e+06	3.45346e+06	3.91353e+06	1.89636e+06	3.44196e+06	533169	2.26187e+06	2.26187e+06	2.26936e+06
M335T870_3			14.871	0.575834	0.018689	335.074	869.699	7.42358e+06	8.89015e+06	5.83775e+06	4.16557e+06	5.6038e+06	4.74578e+06	4.59746e+06	5.01349e+06	4.05022e+06	2.44848e+06	3.79263e+06	1.21162e+06	3.04015e+06	3.04579e+06	3.04266e+06
M333T810_3			14.6928	0.582088	0.0511149	333.059	809.547	6.74911e+06	1.00398e+07	5.41979e+06	3.5555e+06	5.78349e+06	4.1223e+06	5.09296e+06	4.51051e+06	4.39045e+06	2.35788e+06	3.20421e+06	1.20709e+06	2.45104e+06	2.4532e+06	2.5199e+06
M255T75_5			13.6977	1.33683	0.0433789	255.232	74.928	1.35918e+06	1.73145e+06	3.26436e+06	2.28223e+06	2.9875e+06	3.564e+06	3.43318e+06	3.23724e+06	3.63109e+06	3.41083e+06	3.08102e+06	3.5114e+06	3.46679e+06	3.47019e+06	3.54457e+06
M305T645			13.2271	1.06983	0.721314	305.022	644.938	3.34256e+06	2.84507e+06	7.4416e+06	7.45365e+06	7.54754e+06	7.00111e+06	7.00863e+06	8.42342e+06	4.51598e+06	4.59079e+06	5.75125e+06	7.82972e+06	5.28697e+06	5.48575e+06	5.48089e+06
M496T394_2			13.1351	0.555461	0.177374	496.339	393.573	1.50519e+06	2.121e+06	5.64796e+06	2.78478e+06	5.89987e+06	3.89479e+06	799450	56460.1	4.26499e+06	60742.2	4.49554e+06	2.46164e+06	516494	526816	526302
M597T694			13.0369	1.25435	0.363796	597.01	694.034	3.33369e+06	1.80414e+06	4.83065e+06	2.41611e+06	4.63591e+06	3.73744e+06	4.02253e+06	6.56348e+06	1.86058e+06	4.96005e+06	2.45866e+06	6.17236e+06	2.48814e+06	2.09013e+06	2.49544e+06
M319T79			12.8465	170.46	0.00122368	319.19	79.112	16125.5	3033.67	5348.17	1971.06	5024.43	3580.8	1.47476e+06	910417	1.48571e+06	957348	4762.11	1.14736e+06	684999	764735	762694
M783T281			12.5325	1.8243	0.106237	782.568	281.092	518908	618224	1.0156e+06	1.14892e+06	1.44152e+06	3.10329e+06	1.04211e+06	1.48299e+06	2.85804e+06	3.10412e+06	1.75281e+06	4.0742e+06	988857	1.16875e+06	1.17401e+06
M327T71_2			12.5108	0.765231	0.69386	327.161	70.901	9.42716e+06	1.01471e+07	7216.61	7.74867e+06	10247.2	5712.33	7.83345e+06	4949.7	4940.14	4.53638e+06	8.54345e+06	2914.86	3.76221e+06	43358.5	3.69028e+06
M255T78			12.448	0.291905	0.141493	255.195	77.703	469873	1.41785e+06	4678.74	3.64314e+06	2.69859e+06	4.11844e+06	4061.61	3114.5	3918.05	3.58729e+06	3137.1	4258.45	2.20144e+06	27054.4	2.52127e+06
M759T286			12.3806	2.87567	0.0112397	758.568	286.395	256755	233993	701553	614498	987771	982980	1.06145e+06	1.54729e+06	1.84634e+06	1.52324e+06	1.37344e+06	3.51125e+06	1.29205e+06	1.29816e+06	1.29823e+06
M525T362			12.0064	0.39773	0.350767	525.373	361.667	7.71357e+06	7.72493e+06	266813	166244	364425	135431	2.47729e+06	3.24526e+06	199293	371406	173250	44913.7	2.1746e+06	2.17537e+06	2.24726e+06
M633T641			11.8258	1.09887	0.749629	633.034	641.264	787098	1.83642e+06	1.76998e+06	4.67491e+06	3.91322e+06	3.99994e+06	1.88607e+06	2.22104e+06	1.96702e+06	4.54807e+06	2.95136e+06	5.08696e+06	2.65952e+06	2.79771e+06	2.7969e+06
M809T276			10.9473	1.39232	0.149355	808.583	276.476	787049	1.52184e+06	2.3746e+06	3.07551e+06	3.16826e+06	3.79538e+06	3.11517e+06	5.35882e+06	3.42709e+06	3.1358e+06	2.44553e+06	3.01619e+06	2.22924e+06	2.14924e+06	2.2294e+06
M551T641			10.6498	1.1025	0.734004	551.031	640.637	3.91911e+06	2.37644e+06	1.68993e+06	5.61235e+06	1.78371e+06	5.22798e+06	4.88142e+06	2.61775e+06	1.61951e+06	2.99344e+06	4.10662e+06	6.5033e+06	3.57241e+06	4.02049e+06	4.01715e+06
M178T114			10.5324	0.227717	0.216037	178.054	113.562	186456	74569.8	363504	4.12775e+06	1.77026e+06	216140	333928	211501	109209	72827.2	331841	475206	174496	174519	159490
M733T121			10.5091	3.69747	0.00376815	732.552	120.685	264238	263215	475301	91905.1	97038.2	678756	717549	829861	1.35134e+06	1.12819e+06	835356	2.05364e+06	729794	729857	722069
M316T710			10.3947	0.641265	0.0481696	316.116	710.337	4.07776e+06	5.93457e+06	3.70313e+06	2.60943e+06	3.26677e+06	2.91876e+06	2.9209e+06	2.85686e+06	3.23467e+06	1.89576e+06	2.59552e+06	931430	1.85243e+06	1.88134e+06	1.88982e+06
M387T646			10.2869	0.871633	0.5139	387.025	646.082	7.21952e+06	1.34422e+07	8.95054e+06	2.56636e+06	9.06817e+06	8.50862e+06	8.44187e+06	5.07844e+06	6.62743e+06	9.64173e+06	6.8727e+06	6.70629e+06	6.36052e+06	6.60114e+06	6.59571e+06
M807T261			9.99339	2.21781	0.039298	806.568	260.966	141015	221514	1.52263e+06	1.30345e+06	132311	815281	1.27399e+06	1.26201e+06	1.39643e+06	2.76021e+06	1.16392e+06	1.31673e+06	1.10314e+06	1.08714e+06	940258
M807T212			9.64172	1.75946	0.0967108	806.568	211.981	151937	223503	3.10434e+06	3.14532e+06	1.06031e+06	799038	2.18829e+06	3.1764e+06	1.94239e+06	2.33854e+06	2.64202e+06	2.64044e+06	1.35189e+06	1.81928e+06	1.81514e+06
M228T35_1			9.57329	0.442118	0.123201	227.99	34.834	3.75655e+06	2.19922e+06	64978.2	4.66508e+06	4.56602e+06	458936	746510	787486	776220	875385	1.44556e+06	2.31486e+06	505976	527121	531038
M267T388			9.41769	0.542433	0.123012	267.073	387.648	2.55477e+06	5.23208e+06	1.90884e+06	1.1705e+06	1.7216e+06	1.54224e+06	1.46141e+06	1.70565e+06	1.70864e+06	890977	1.46299e+06	434932	847972	885986	884914
M793T298_1			9.38951	0.299046	0.0107143	792.588	297.811	1.4962e+06	2.31901e+06	2.42683e+06	807877	591404	1.15581e+06	577231	655098	569941	170965	565384	92128.9	1.67744e+06	1.69132e+06	1.6954e+06
M165T186			9.20779	0.131111	0.0531654	165.055	185.583	269183	391968	451963	2.16358e+06	1.04686e+06	282013	144886	108454	209489	31347.3	94050.3	15616.2	62680	58173.1	62627.1
M787T240			9.17938	2.77783	0.00970069	786.598	240.15	147967	189733	213005	592635	525603	462735	370688	724304	798394	1.41401e+06	1.06297e+06	1.55109e+06	622642	776864	776605
M469T643			8.84881	0.809984	0.49069	469.028	643.277	1.47827e+06	1.01818e+07	2.98511e+06	7.26379e+06	6.72076e+06	6.61755e+06	6.28307e+06	2.95172e+06	2.46243e+06	3.51609e+06	5.27161e+06	8.06481e+06	4.77449e+06	4.91417e+06	4.91064e+06
M192T231			8.64673	0.0150799	0.298743	192.049	230.962	6346.41	9265.62	11556.3	2.92274e+06	244958	6253.61	25598.1	5931.41	1333.72	6060.3	985.1	8363.77	3761.37	3769.28	1237.97
M351T694			8.63448	1.20214	0.340054	351.001	693.635	889213	3.26319e+06	2.4989e+06	2.85181e+06	1.019e+06	2.57812e+06	2.16225e+06	2.98656e+06	2.73542e+06	2.75803e+06	2.03424e+06	3.07177e+06	1.92618e+06	1.93103e+06	1.92617e+06
M187T690			8.56857	1.07873	0.586834	186.995	690.292	1.25922e+06	4.36605e+06	3.54265e+06	3.81827e+06	3.44578e+06	3.54537e+06	3.21397e+06	3.96569e+06	3.79908e+06	3.57193e+06	3.0039e+06	3.99566e+06	2.9274e+06	2.93464e+06	2.92526e+06
M843T691			8.53018	1.48735	0.308199	843.02	690.581	199311	2.95821e+06	2.47001e+06	547640	1.01464e+06	1.17484e+06	2.02418e+06	3.10343e+06	2.88706e+06	2.93216e+06	962376	531961	1.71427e+06	1.63035e+06	1.71477e+06
M679T693			8.48663	1.0233	0.936329	679.013	692.632	2.47944e+06	5.33084e+06	2.58295e+06	3.96059e+06	2.14573e+06	1.70706e+06	2.99754e+06	3.76114e+06	856544	4.28051e+06	1.61639e+06	5.11867e+06	2.40564e+06	2.60157e+06	2.60206e+06
M787T284			8.28987	1.47812	0.0697768	786.598	283.938	372847	394617	1.05886e+06	1.249e+06	1.05731e+06	1.17868e+06	921546	1.4654e+06	1.38112e+06	1.49867e+06	900857	1.68318e+06	1.25179e+06	1.29858e+06	1.25224e+06
M223T645			8.25883	1.07995	0.627072	223.02	644.666	1.95488e+06	3.38262e+06	877486	2.2827e+06	2.32224e+06	2.13857e+06	2.20562e+06	2.53796e+06	2.57975e+06	2.3461e+06	1.88009e+06	2.44498e+06	1.69805e+06	1.72515e+06	1.73429e+06
M733T289			8.16547	2.56547	0.0121244	732.552	289.211	86253.4	93286.3	389734	470297	544120	609221	669663	858345	1.17062e+06	583506	708693	1.63502e+06	570141	586311	569997
M194T97			7.91337	0.799867	0.297926	194.013	97.261	7.13344e+06	1.10342e+07	7.32808e+06	3.8387e+06	5.41289e+06	5.31717e+06	6.45387e+06	6.36357e+06	6.91328e+06	5.54863e+06	2.73024e+06	4.03672e+06	2.16329e+06	2.16549e+06	1.90018e+06
M522T388			7.90569	0.692226	0.328041	522.355	387.904	341015	1.31356e+06	3.06669e+06	1.90432e+06	3.16834e+06	1.81668e+06	945268	819638	2.68941e+06	192362	2.19671e+06	1.19377e+06	228754	228842	233447
M387T63			7.8899	2.49462	0.396172	387.251	63.1565	3129.3	1.99926e+06	8457.67	2019.88	2863.22	1.65124e+06	5093.42	6.04429e+06	1.56489e+06	1.52791e+06	2237.63	3278.39	13683.1	664190	660242
M173T38			7.83733	0.486436	0.103887	172.991	37.945	1.31068e+06	793019	825948	2.60547e+06	1.75618e+06	432357	428136	416277	1.49858e+06	320563	547184	546319	203539	203550	210718
M557T71_2			7.83652	0.426239	0.0152619	557.298	70.901	1.5026e+06	1.23562e+06	1.68075e+06	762349	584087	781723	436483	638906	638527	215063	786533	75127.8	770432	758844	770415
M295T79_2			7.81336	1.31604	0.2637	295.227	79.318	1.05318e+06	885969	931485	165044	831699	2.04347e+06	1.31079e+06	1.23172e+06	1.25539e+06	1.52485e+06	934464	1.52167e+06	927606	954242	953380
M783T224			7.51769	2.19937	0.146192	782.568	223.806	133758	134509	218906	121364	323140	2.79541e+06	1.19489e+06	888658	2.1915e+06	1.12413e+06	1.34386e+06	1.45421e+06	1.1303e+06	1.11569e+06	1.11601e+06
M522T372			7.48167	0.874274	0.780236	522.355	371.834	1.93557e+06	4.69119e+06	1.1135e+06	398914	1.29663e+06	707815	2.7386e+06	2.52005e+06	1.0639e+06	1.18387e+06	911118	450763	1.25678e+06	1.27008e+06	1.27001e+06
M783T80_1			7.40913	1.47166	0.254477	782.567	79.711	764813	631494	604253	437895	794202	1.73121e+06	647281	795734	1.5054e+06	1.13768e+06	846715	2.37232e+06	599090	589320	589320
M704T352			7.35421	2.29595	0.0525936	703.573	351.539	234180	293925	357717	270506	346495	284938	846104	1.27879e+06	317849	1.0351e+06	277155	349623	1.30106e+06	1.08707e+06	1.08378e+06
M810T270			7.3216	1.42445	0.193956	809.586	270.075	413026	635893	1.18869e+06	2.05072e+06	1.15421e+06	2.05297e+06	1.43301e+06	1.78004e+06	2.96288e+06	1.69942e+06	1.11813e+06	1.68351e+06	1.04574e+06	725567	1.04128e+06
M783T262			7.24564	2.16623	0.0702923	782.567	262.005	101760	104045	156280	208550	611797	1.02406e+06	559411	431855	937377	716122	692300	1.44271e+06	534771	432252	530534
M835T299_1			7.16334	0.626559	0.0135362	834.599	299.152	1.41053e+06	1.89538e+06	1.45007e+06	1.8775e+06	1.69762e+06	1.12232e+06	1.05145e+06	1.39199e+06	1.21147e+06	536594	1.2214e+06	510211	1.39922e+06	1.3558e+06	1.35425e+06
M330T69_11			7.11137	0.299437	0.191358	330.317	69.02	1.27714e+06	9352.27	4303.87	1.6878e+06	1.59353e+06	5845.8	3007.68	342646	3948.53	1824.39	1.01684e+06	2546	501133	517378	43549.1
M135T299_2			6.94321	0.735571	0.125952	135.031	299.24	4.41869e+06	5.05873e+06	3.28841e+06	2.13704e+06	3.18243e+06	2.71108e+06	3.72051e+06	1.99393e+06	3.11342e+06	1.99278e+06	2.80674e+06	1.66984e+06	1.7966e+06	1.86059e+06	1.85791e+06
M759T308_1			6.8799	1.76199	0.0591425	758.568	308.451	602643	595317	360928	303474	446933	538057	484670	718487	952758	686614	593158	1.58133e+06	563499	567903	567904
M667T810_1			6.87751	0.518523	0.0195628	667.125	810.073	1.28637e+06	1.48207e+06	924351	628820	797350	651430	704536	690201	567246	382397	503073	144625	443331	447161	447103
M515T792			6.84019	0.463314	0.0194227	515.212	791.517	1.12768e+06	1.39543e+06	870348	504599	724840	591466	580085	450654	644030	205270	493739	42109	245308	246889	246155
M242T710_1			6.75769	0.661025	0.0638408	242.08	710.342	1.95994e+06	2.85578e+06	1.6955e+06	1.23717e+06	1.59083e+06	1.40799e+06	1.46545e+06	1.36367e+06	1.5914e+06	925264	1.29934e+06	459041	934178	935009	954357
M258T802			6.75726	0.561184	0.22614	258.11	801.931	1.22217e+06	1.53041e+06	1.09392e+06	4.50184e+06	1.03044e+06	872174	912795	730549	1.03596e+06	628004	891891	1.55347e+06	585717	585185	474837
M137T337			6.56931	1.09171	0.443166	137.045	336.66	4.34503e+06	6.40764e+06	5.56278e+06	4.90894e+06	6.54551e+06	6.60481e+06	6.85653e+06	5.34796e+06	7.54803e+06	5.18112e+06	7.79179e+06	4.80193e+06	5.17807e+06	5.22399e+06	5.23928e+06
M353T73			6.55105	0.0140858	0.315336	353.047	73.375	5359.22	11954.7	10980.3	1.7276e+06	69377.5	5989.35	7396.86	11348.8	3755.3	748.442	620.736	1924.64	3207.97	2817.37	3207.36
M702T351			6.45246	1.48193	0.296664	701.558	350.562	418990	1.12733e+06	671590	487428	544792	453441	1.09747e+06	1.90017e+06	597898	1.19995e+06	402913	290041	1.37477e+06	1.34711e+06	1.34705e+06
M809T256			6.43478	1.42813	0.189957	808.583	256.029	236597	355086	1.40391e+06	1.13243e+06	2.10503e+06	1.43086e+06	1.92704e+06	1.90557e+06	2.04896e+06	1.36638e+06	1.01468e+06	1.25428e+06	1.43534e+06	1.58824e+06	1.59141e+06
M279T80			6.43064	8.81614	0.346718	279.159	79.831	4876.12	12387.4	6707.48	242255	213822	4085.53	4106.67	3.88244e+06	367907	3478.39	6875.46	3378.32	143120	142051	23935.5
M811T277			6.35191	1.17546	0.760496	810.597	277.385	297994	622453	256784	1.3915e+06	655175	1.56612e+06	588365	448624	658624	388253	695478	2.85114e+06	677221	678754	750459
M482T401			6.27564	0.383097	0.0479584	482.359	400.682	156924	265009	705536	814706	800858	402278	59924.6	2820.93	330041	46444.6	527152	238577	57575	58762.5	59176.4
M124T531_2			6.24489	0.752008	0.317421	124.007	531.04	3.37301e+06	4.47017e+06	2.00281e+06	1.3617e+06	1.87871e+06	1.3486e+06	2.54379e+06	1.38792e+06	1.9773e+06	1.42266e+06	2.43227e+06	1.09129e+06	1.35961e+06	1.4531e+06	1.44942e+06
M537T780			6.23831	0.7278	0.1504	537.194	780.225	1.82727e+06	3.03556e+06	2.21565e+06	2.18441e+06	2.3209e+06	2.40369e+06	2.20578e+06	2.66098e+06	2.45122e+06	578843	1.67326e+06	610015	1.01742e+06	1.17869e+06	1.01881e+06
M784T221			6.22524	1.44133	0.527828	783.571	221.03	80230.6	86001.9	426633	234002	607943	1.43472e+06	180639	578010	210713	619154	712571	1.83487e+06	588635	552936	588386
M140T343_2			6.2222	0.515083	0.101632	139.984	343.332	1.05344e+06	1.8273e+06	677217	499611	831953	511424	823668	257068	847644	112435	528415	212707	269485	267750	302941
M186T1206			6.16684	1.57958	0.217558	186.103	1205.9	657564	760517	390699	114425	177860	172762	659559	962194	750516	242272	761817	215344	563031	577821	685218
M570T379_2			6.07522	0.45291	0.14212	570.354	378.666	119883	88502.3	912168	994064	746898	396076	134568	109371	561146	29138.6	501201	139972	82528.6	83079.4	83555.5
M735T290			6.06331	2.80904	0.00778455	734.566	290.195	73440.7	72659.6	194700	126571	228274	246240	312209	286621	438164	401184	385448	822169	302326	302932	283723
M812T267			5.8969	2.49088	0.0714772	811.601	266.566	50451.8	284510	134659	113171	154134	337992	141806	214266	171298	714396	605430	830291	220026	230500	241453
M333T147			5.87195	0.0340064	0.284801	333.091	147.347	267.761	2918.63	16052	1.33046e+06	167589	5810.5	15708.3	27203	3557.84	2037.87	766.927	2521.13	3614.44	3406.21	3613.13
M123T184			5.70326	1.09277	0.705951	122.975	184.391	997228	2.24157e+06	916591	959113	2.08715e+06	910103	936214	1.93977e+06	1.15177e+06	1.82761e+06	1.95e+06	1.05896e+06	1.07365e+06	1.0183e+06	920337
M558T310			5.58269	0.246017	0.0922497	558.331	310.438	940698	1.04442e+06	193207	139910	168479	133813	110713	92589.9	127028	66379.2	149963	98020.4	98402	98379.3	101071
M79T828			5.57072	1.08884	0.630794	78.9588	827.521	664044	1.24811e+06	843782	305502	880443	668234	851112	891834	1.0083e+06	862209	613167	793040	572887	612441	610980
M715T641			5.54186	0.754016	0.375356	715.037	640.631	510688	3.98209e+06	2.55754e+06	3.199e+06	1.14946e+06	2.69479e+06	2.03016e+06	1.54911e+06	1.44475e+06	3.19013e+06	765090	1.64755e+06	1.6507e+06	1.58235e+06	1.69452e+06
M330T70_19			5.49974	0.250435	0.296033	330.346	69.6395	949383	1487.5	1741.95	1.14228e+06	2191.52	634.093	1651.49	1381.25	1089.87	1618.85	517676	1924.12	537383	495096	495997
M808T277			5.48573	1.26584	0.341823	807.571	276.623	178177	429969	830857	1.54426e+06	795587	719707	797833	1.00065e+06	752251	1.1386e+06	900325	1.10478e+06	712939	691370	750615
M702T364_1			5.47101	0.959072	0.929501	701.558	363.586	127350	207103	1.81901e+06	2.03731e+06	2.00237e+06	1.48187e+06	398654	861936	3.37659e+06	459168	1.26501e+06	999536	427567	450247	450207
M704T363			5.44337	1.09655	0.765168	703.573	363.439	207375	329796	1.07595e+06	1.29922e+06	1.21169e+06	1.10077e+06	460061	737572	1.26549e+06	544586	1.01672e+06	1.70485e+06	428023	446962	447080
M781T281			5.39541	2.23405	0.0120093	780.551	280.814	45666.1	56220	267064	208705	286229	373262	340770	351207	731122	473956	334030	532764	226657	226323	178378
M835T265			5.39536	0.885903	0.647377	834.599	264.575	619902	1.14665e+06	3.17235e+06	3.56499e+06	3.25646e+06	2.3969e+06	1.60346e+06	2.8685e+06	2.4599e+06	1.71531e+06	2.7224e+06	1.17238e+06	1.87669e+06	1.65307e+06	1.72741e+06
M195T828			5.34183	1.083	0.709584	194.946	827.558	574341	1.25492e+06	810546	188945	766062	671506	721487	898788	937916	769725	519452	773036	450523	488216	487508
M120T99			5.33712	2.21602	0.00672431	119.975	98.727	197707	67705.6	254604	28807.3	146719	20556.3	302292	228997	230462	277398	321476	226264	305244	327832	327656
M797T640			5.32361	0.922326	0.796691	797.041	640.222	274172	622956	1.39344e+06	1.74101e+06	1.31955e+06	1.47061e+06	701281	640294	1.60552e+06	733254	624329	1.98719e+06	824287	662794	817518
M212T376			5.32234	1.11389	0.673731	212.075	376.29	819906	222699	698141	1.28648e+06	1.26882e+06	745164	1.44818e+06	726686	500764	730932	914059	1.29473e+06	794404	794841	748570
M187T38			5.30984	0.266977	0.0792172	187.007	37.748	1.26208e+06	410520	206865	448310	314222	98085.9	100599	173169	200126	34708.2	86016.5	136921	28658	28699.6	30552.5
M184T700			5.22045	0.728458	0.0411559	184.094	700.167	1.4734e+06	1.61634e+06	1.32612e+06	943635	1.1519e+06	1.06106e+06	1.09028e+06	990558	1.13327e+06	637981	1.09604e+06	568074	815307	795263	815246
M794T266			5.21699	0.492052	0.177603	793.592	265.517	68227.7	113383	532231	1.18009e+06	500130	866988	110552	435089	144384	273974	533346	107260	190344	205275	203398
M793T263			5.15842	0.52293	0.297808	792.588	262.666	126824	203478	668014	2.18734e+06	2.18529e+06	753454	401356	1.5247e+06	319350	790492	94943.6	71792.1	470798	568145	468418
M702T377			5.14578	0.462031	0.0287517	701.559	376.829	325451	533131	477524	478054	470824	419312	26783.6	23100.2	558472	21689	318723	300699	36199.5	31209.8	33225.5
M463T39_7			5.13824	0.903223	0.706993	463.287	38.859	7.29458e+06	3.03879e+06	5.67084e+06	2.0099e+06	2.36387e+06	4.64859e+06	2.33709e+06	3.8161e+06	3.8857e+06	5.73344e+06	5.00408e+06	1.82816e+06	6.42519e+06	6.25345e+06	6.42526e+06
M123T244			5.11224	0.141894	0.0684298	123.023	243.525	575229	918785	8945.22	305259	3247.43	327615	4793.3	11553.1	675.563	274746	8766.92	2986.8	2472.42	2986.01	2975.76
M279T284			5.07535	0.871647	0.526332	279.039	284.419	4.40227e+06	9.41681e+06	3.9047e+06	2.68354e+06	4.997e+06	4.76155e+06	5.28387e+06	3.80326e+06	5.20221e+06	3.59384e+06	4.21085e+06	4.19996e+06	2.98024e+06	3.07173e+06	3.07365e+06
M376T55			5.03036	0.503565	0.402244	376.318	54.9845	1.13252e+06	1.13418e+06	624611	1723.19	2820.93	2064.41	729356	2470	719422	2620.77	3479.08	1939.75	2957.39	2845.66	2956.23
M783T304_1			4.97176	1.32503	0.376651	782.568	303.726	724047	657874	451926	276201	599006	1.29511e+06	578041	606739	1.14449e+06	544791	728965	1.70262e+06	714648	715009	755341
M812T206			4.92474	1.34704	0.602118	811.601	205.531	105047	130029	464812	119069	136001	1.58205e+06	519899	618351	120267	579169	459546	1.12021e+06	532231	532260	527889
M703T352			4.9206	2.40943	0.084257	702.561	351.726	189290	288245	300050	209408	239854	224290	493490	929331	1.24279e+06	525988	182362	122452	596397	573702	573839
M482T383			4.90627	0.238178	0.231226	482.359	383.125	1.26509e+06	1.4422e+06	14491.8	43779.4	32685.8	46181	220213	272516	11177.5	155904	6781.23	10888	183411	186333	183434
M526T385_3			4.90273	0.592615	0.288762	526.376	385.043	55000.5	62872.6	905453	536833	815400	608408	174588	100768	577670	56347.3	641441	217529	97398.5	99746.5	99692.2
M123T131			4.89928	0.571324	0.26302	122.975	130.675	302790	2.12756e+06	2.01121e+06	155865	1.72772e+06	446528	800398	629698	401989	683687	1.25778e+06	95262.4	569380	515390	668737
M772T771			4.88573	0.490536	0.0247523	772.314	770.93	624663	818231	463442	284422	383211	382168	339661	279206	335198	145773	319437	30817.6	201446	202722	201453
M258T850			4.85871	0.645214	0.0406412	258.11	850.496	942475	672352	786967	511015	779726	567536	494140	543332	718269	270713	571326	150879	281238	281522	287377
M327T436			4.84746	0.47537	0.0203604	327.141	436.142	506749	769874	445067	278276	394330	366131	283129	105618	379327	73496.3	339219	131435	205488	207198	205485
M785T81			4.84629	1.76692	0.0693644	784.58	80.744	280324	198936	169660	102276	212604	366434	223485	214629	483470	470484	281507	676844	248062	244284	248064
M733T311			4.76455	1.84414	0.0338076	732.552	311.428	225524	258751	158334	176111	210455	252454	258506	324600	493254	295850	283526	707770	245678	236769	236717
M177T828			4.68897	1.10282	0.662078	176.936	827.869	427458	984797	592362	155998	624335	476143	585901	706196	755145	624979	372685	551499	343167	359475	359243
M731T287			4.67902	3.25953	0.0121578	730.536	286.744	20329.9	22081.9	97509.7	105007	169965	113182	192599	247032	354685	157832	211799	557327	153574	159412	157234
M783T148			4.66864	3.79644	0.0037942	782.567	148.371	68468.9	59698.5	121908	100088	153030	63045.9	119881	222015	552022	320901	509042	425831	168552	167504	168540
M515T694_1			4.66736	0.827984	0.513444	515.007	693.586	6.92692e+06	3.44332e+06	3.7491e+06	3.74289e+06	1.00303e+07	1.08169e+07	3.68078e+06	7.62794e+06	8.62703e+06	4.66824e+06	3.37633e+06	4.07043e+06	4.96462e+06	4.49765e+06	4.55942e+06
M113T45_2			4.65748	1.06951	0.676604	112.985	45.152	1.13392e+06	919423	776267	546046	609094	687920	1.00285e+06	1.15667e+06	736819	870841	614726	615557	573311	573681	588936
M214T837			4.64125	2.02004	0.277573	214.126	837.256	4614.38	3399.62	1086.32	429931	2350.7	412096	415816	419619	1252.25	446010	1844.39	439517	431450	437084	431411
M568T381			4.54169	0.625593	0.298224	568.339	380.991	116208	94556.3	811019	679708	597020	371541	162754	127805	584753	58745.1	524522	211787	82074.4	82346.9	85762
M258T831			4.53759	0.560116	0.0459333	258.11	830.548	532384	670042	540862	328188	364201	303434	306780	282937	492331	116982	294307	40882.4	131451	134700	134615
M387T59_5			4.52776	0.568235	0.455645	387.235	58.898	2.30124e+06	2.1792e+06	5.28106e+06	1720.91	1.48407e+06	2370.9	4601.62	1034.99	2445.04	1895.43	3.32818e+06	3.05429e+06	4167.1	967767	971072
M258T913			4.50217	0.673136	0.162702	258.11	912.766	966943	1.26425e+06	917050	338322	446292	759424	666860	614857	796960	281930	592575	205360	401043	425190	472274
M327T91			4.48901	0.394453	0.031043	327.232	90.5335	675547	555375	313776	240009	342989	186294	58969.3	111405	92333	140712	403602	105740	129559	128949	101103
M791T297_1			4.43249	0.736541	0.188795	790.573	296.951	754037	1.36146e+06	1.22893e+06	1.2279e+06	1.05817e+06	720536	981380	1.11408e+06	994038	343104	1.05746e+06	187730	952435	952411	956054
M526T396			4.42954	0.325328	0.00376949	526.376	396.145	264310	261204	278917	169489	269996	214838	3219.43	1736.21	192310	1074.25	211308	64925.4	2893.16	3151.7	3125.04
M879T641			4.42047	1.31104	0.459319	879.044	640.846	127828	359257	399591	1.01055e+06	317438	357232	357131	497714	889220	973740	240462	413597	449943	435303	463065
M787T306_1			4.39885	1.15153	0.471627	786.599	305.894	776131	1.49046e+06	727476	727035	869285	783062	822928	1.30235e+06	1.36119e+06	664218	711683	1.32534e+06	771280	771224	745435
M539T682			4.39645	1.625	0.0873585	538.968	681.591	30113	415851	452050	229924	148754	155344	419869	450668	186801	406611	411152	451963	819458	819534	647131
M137T399			4.31196	0.376614	0.139509	137.045	398.623	613636	1.95455e+06	240730	311139	360650	673420	409298	485518	196529	183942	146859	142354	99306.9	110730	99204.6
M123T246			4.27873	0.806597	0.651641	122.975	245.704	477641	3.41745e+06	2.71435e+06	307466	1.27231e+06	388434	753701	1.66584e+06	1.2957e+06	1.03982e+06	1.87177e+06	291882	602050	611039	469462
M231T102			4.25778	2.29139	0.217884	231.044	102.07	108152	50092.2	254664	6304.67	83779.7	160889	106514	725568	94254.2	339290	68976	186610	151352	151307	119202
M279T342			4.23779	4.17232	0.0509638	278.981	342.25	3831.24	213974	2663.63	3213.68	3461.05	899.481	3212.82	140599	300122	117109	231806	158617	111536	113466	113432
M523T367			4.19087	0.713598	0.538287	523.358	366.706	736916	1.47823e+06	334956	106975	406339	238261	826321	763452	323862	359209	53304.9	29919	401087	402148	407130
M333T79			4.18785	0.047836	0.310479	333.089	79.064	8301.89	4922.54	6105.95	707441	48354.3	4000.49	8156.62	10711.2	2478.33	5734.78	3732.63	6456.71	1362.74	2326.95	2277.14
M480T400			4.18565	0.417401	0.0663413	480.308	400.133	146436	154064	515361	216850	536956	242630	103527	3956.67	269821	5144.58	226438	147568	51158.4	51156.8	51678.2
M282T70			4.17198	0.404886	0.27291	282.34	70.278	525610	911039	6032.21	677601	6667.25	1.08066e+06	3568.12	4139.86	6620.24	1.23122e+06	3972.56	49196.6	666345	661152	16248.1
M105T712			4.15406	1.30994	0.11573	104.991	712.265	458278	408367	472535	485382	159915	253529	424241	478792	478671	494690	391616	663636	389735	388528	389737
M795T200			4.14506	0.487762	0.190228	794.601	199.749	41156.7	60755.3	195598	827750	620783	496123	317214	215546	133935	84542.9	208138	134267	349321	348573	321166
M97T828			4.13888	1.05988	0.747567	96.9693	827.869	458907	868023	555428	218436	574259	488077	576661	522456	723460	605446	424856	499657	376613	376792	388291
M393T49_1			4.1243	3.36805	0.202572	393.338	49.311	17352.3	10718.7	16877.5	11318.5	364255	2622.47	1884.38	1009.29	466392	551677	603.579	403604	164200	162456	29239.8
M1195T691			4.12334	1.97532	0.0099449	1194.99	691.058	69933.3	40204.9	99554.9	135067	133980	239776	150179	285863	246860	259307	183425	293666	198528	200035	200036
M573T711_1			4.09333	0.526749	0.015648	573.218	710.877	422996	509808	392783	224650	267065	274740	207629	266871	247539	136968	205857	37115.4	128214	127350	129659
M785T306_1			4.07637	1.53196	0.107475	784.581	305.533	353891	316255	227511	167835	222286	367005	301200	282357	553935	298513	356695	742362	330106	331907	330106
M807T279			4.04386	1.19298	0.48018	806.567	278.858	324121	515241	1.64983e+06	1.6428e+06	2.045e+06	1.2676e+06	1.61912e+06	2.02231e+06	1.69712e+06	793283	1.39395e+06	1.35549e+06	1.29045e+06	1.29226e+06	1.3663e+06
M785T687			4.04007	1.7012	0.0712856	784.977	687.12	158402	85047.4	267713	305301	313370	314410	273582	333219	627328	651929	317660	253232	423025	363108	362119
M255T67			4.02217	0.497931	0.378245	254.981	67.166	159261	106833	69286.4	848978	246550	41777.5	80967.3	77399.5	365670	46963.1	64999.3	97297	28777.7	28772.7	29159.8
M175T1094			4.0061	1.66692	0.0596737	175.118	1094.17	185015	200653	245800	171724	160801	162098	245197	230484	315972	244233	247768	593451	223532	203439	174060
M705T348			4.00549	1.50568	0.241743	704.577	347.796	312546	236983	136376	104229	128750	123305	338623	432791	122136	418162	107363	150130	501790	428114	428250
M795T300			4.00081	0.596544	0.00759334	794.602	300.259	335301	515399	447378	509431	448934	426340	293422	418575	306075	120222	323601	138504	324125	324168	311350
M795T266			3.98025	0.682164	0.383296	794.601	265.762	156526	175069	229112	1.04917e+06	1.10343e+06	740348	173605	738790	517360	373522	349537	203143	177629	177890	138963
M925T690			3.96934	0.679261	0.289803	925.022	690.457	107088	1.62352e+06	772912	1.81788e+06	640899	1.11277e+06	532889	331129	379389	862138	1.01702e+06	1.00399e+06	998946	995308	994407
M191T870			3.96612	0.592404	0.259564	191.019	869.897	196370	310132	115679	830779	254920	374047	106485	76178.8	339054	51414.1	324230	335981	190153	189240	108640
M757T285			3.91704	2.72881	0.0080021	756.551	285.361	18771.1	18551	92764	64438.8	101456	118436	111764	166548	234767	164158	131765	321863	128901	119400	128899
M293T77_2			3.91218	1.5352	0.00858824	293.175	77.105	91036.1	107074	161697	110691	153837	152161	149962	187842	243173	200536	157790	252769	248831	255965	255634
M339T41_2			3.88067	0.438359	0.319225	339.199	40.847	1.47335e+06	355469	153389	142068	157055	145149	166713	206548	195731	197167	142463	155047	115166	111006	115165
M131T247			3.87826	0.333322	0.0123031	131.071	247.04	374424	247613	112172	245652	118009	137143	91195.6	53714.6	139055	39677.3	36056.7	51958.1	45847	42765.2	42851.4
M523T382			3.87416	0.265111	0.136071	523.426	382.485	1327.55	2491.5	611679	244775	653723	344601	5641.52	477027	2746.25	959.004	5251.1	1110.21	89718	89945.8	4418.58
M794T772			3.85622	0.758136	0.0640433	794.297	771.545	1.68312e+06	2.40146e+06	1.63392e+06	1.5566e+06	1.66815e+06	1.67541e+06	1.52102e+06	1.72705e+06	1.6509e+06	1.33247e+06	1.16353e+06	655409	1.17313e+06	1.17517e+06	1.17489e+06
M949T688			3.84261	1.4134	0.179844	948.984	688.084	200614	112369	405168	457390	688587	363686	626406	815333	398440	445742	427901	434977	464731	500279	499939
M781T225			3.83887	2.59301	0.0282307	780.552	224.531	18550.1	21549.2	82666.4	82345.4	283889	64810.1	321443	233972	91560.4	326117	316271	146675	189919	166718	189090
M242T611			3.82335	0.712755	0.0171054	242.079	610.725	1.3125e+06	1.2332e+06	1.10968e+06	985763	920219	729438	759287	843739	758840	812804	845658	463467	784854	793074	786217
M351T212			3.81566	1.16193	0.846577	351.216	211.915	66374.3	62142.3	95111.3	31805.2	87771.6	1.64304e+06	317413	179663	509580	280751	427556	592918	179122	179256	191295
M157T566_2			3.80072	0.803791	0.138332	156.991	566.348	2.5335e+06	3.01467e+06	2.02567e+06	1.52484e+06	1.9115e+06	1.61028e+06	1.65106e+06	1.73924e+06	2.15847e+06	1.51655e+06	1.67119e+06	1.40771e+06	947388	952613	1.00886e+06
M81T88			3.78253	1.37722	0.000413497	80.9161	88.0085	149385	115881	174236	143006	152615	137600	193522	210768	193550	222842	172834	208419	151984	152086	156834
M181T175			3.76175	0.0604817	0.125932	180.999	174.904	86607	21232.7	29306.8	441597	130002	7615.38	5165.96	6252.27	17889.5	2678.57	7040	4300.38	3053.79	3104.94	3068.96
M830T711			3.75799	0.443376	0.0240816	830.32	710.877	279937	401401	247976	127340	144307	172457	117613	152902	147371	56478.7	123439	11137.3	59116.2	59102.8	60048.5
M564T682_2			3.74485	0.461614	0.0989048	564.005	682.173	265045	986163	442901	233899	409352	260283	247230	318408	378601	98275.3	83084.5	73508.5	58126.2	72872.6	72870.8
M281T90			3.70561	0.611237	0.140557	281.248	89.8725	850530	795401	345165	236368	354661	259786	300040	250314	365808	309411	321534	189975	285472	297127	296463
M130T470_2			3.68933	0.401888	0.127654	130.087	469.981	692870	357005	181894	106279	152155	102530	86254.6	67623.1	193488	74918.3	128668	89148.4	37663.5	38202	39068.2
M761T222			3.65896	2.18173	0.00728969	760.583	222.223	40827	60392.5	73689.8	71011.7	91108.7	77497.3	116599	146198	121770	236063	83413.8	200343	80511.4	80423.9	89968.5
M325T41			3.65453	0.476135	0.296403	325.183	40.5785	1.37857e+06	416126	177939	173701	158110	182798	184961	232400	192329	216853	164991	192730	124762	122110	122147
M258T1008			3.63509	0.571354	0.367097	258.11	1008.09	1.18427e+06	384994	266493	125502	165316	168250	316556	102313	396039	187026	264991	44232.6	79781.9	65449.3	79756.7
M111T156			3.60006	1.24103	0.333171	111.02	156.449	277458	315133	290876	38517.9	241075	227682	238075	183232	427085	265207	248836	363511	149409	152679	152570
M122T1280			3.58763	1.84834	0.194504	122.096	1280.04	25143.8	53954.9	70442.9	291977	96097.5	73643.4	60908.6	248662	105000	285084	88353.9	341806	154840	178785	170238
M265T39			3.56044	1.51982	0.436631	265.147	38.662	434532	275688	175922	144734	160879	180587	320236	1.03261e+06	237977	157526	133914	203448	268715	268798	274454
M482T682			3.55325	0.348558	0.0588071	482.002	682.16	232960	711465	320789	158433	210876	142590	59343.3	153072	204771	78173.5	65761.9	58304.6	42540.5	53202.9	53307.3
M1048T385			3.53119	0.420559	0.153056	1047.73	384.535	71381	64642.2	573493	141605	451279	222252	155034	16338.7	193912	24040.5	231947	19934.9	93554.4	92678.2	93552.7
M120T65			3.5142	2.27893	0.0174262	119.976	64.518	33407.4	18034.7	112743	11358.6	72344.2	108599	156291	123353	97695.3	222403	109817	102850	176173	188705	188312
M539T713			3.50763	1.08089	0.713076	538.968	713.382	156787	300861	524399	549659	542022	553999	511885	409388	576385	553024	187429	602161	439407	439647	319737
M454T388			3.50575	0.331063	0.253304	454.291	388.491	754361	590943	44671.5	38091.1	42613.2	28909.1	156425	166028	34611.6	84516.7	39822.7	15053.2	164184	183292	164583
M457T681			3.48766	1.48767	0.128909	456.965	681.023	23453.9	175943	150558	201292	92300.7	266199	260464	286138	134739	245585	142866	283614	262147	179788	259885
M781T80_1			3.48266	1.51994	0.0309372	780.552	80.067	156819	154406	182872	110458	179007	170391	150367	294507	294439	209718	166846	334075	122077	122074	123247
M835T196			3.48265	1.24266	0.614894	834.598	195.617	215192	382855	559856	2.17519e+06	2.86755e+06	2.00952e+06	2.74346e+06	3.02512e+06	466442	841302	2.21979e+06	906304	1.55956e+06	1.55022e+06	1.26093e+06
M355T69			3.44335	0.0167203	0.31939	355.063	69.127	1289.38	3272.02	4584.75	883919	37432.5	1834.52	2563.75	6005	2132.72	1239.84	1836.24	1811.37	2322.42	2293.63	2339.06
M813T276			3.44233	1.85274	0.167678	812.608	276.078	49382.1	62201.3	50666.1	168984	94958.2	137062	107265	110622	158190	171898	82124.7	413465	70488.9	77258.1	70825.7
M821T637			3.43019	1.51124	0.0470097	821.002	637.173	97329	126902	92559.8	172231	112361	66165.2	178452	210144	173575	200439	71205.1	175011	172678	155014	157002
M445T611			3.41398	0.529679	0.022892	445.194	610.714	505869	412855	312504	272102	253169	159919	212695	176529	163217	179369	227333	55941.5	251713	255195	255196
M387T59_4			3.40105	1.12421	0.74961	387.18	59.46	1.817e+06	1.7142e+06	4.34536e+06	1.18555e+06	1.16234e+06	1.29559e+06	1.15185e+06	4.51017e+06	1.27508e+06	1.1928e+06	2.52777e+06	2.29322e+06	954517	952109	954528
M657T634			3.39599	1.58497	0.00523327	656.996	633.635	75535.6	89505.2	106698	113180	62622.1	109651	112462	178405	173651	121495	122555	174566	167557	131339	135576
M691T691			3.38965	1.82716	0.0436561	690.993	691.409	18501.2	57042.9	68705.4	66887.7	158207	168517	159891	201220	75833.2	192151	140324	213340	150514	148655	150499
M242T727			3.38949	0.032023	0.0135916	242.052	727.23	183657	1695.42	187652	127996	202490	1692.86	3285.45	4491.59	3551.57	3830.42	3399.88	4023.2	1582.46	1780.17	1622.68
M303T70_3			3.38614	0.902804	0.510468	303.232	70.337	2.64262e+06	2.93724e+06	2.48076e+06	1.29314e+06	2.4434e+06	2.21761e+06	1.88836e+06	1.33079e+06	3.03128e+06	1.86807e+06	2.50981e+06	2.02428e+06	1.67126e+06	1.72386e+06	1.72218e+06
M759T255			3.36205	2.74173	0.0617247	758.568	254.597	26473.2	28684.1	216023	194686	59040.1	73226.4	91719.6	397250	581247	218766	131696	219242	133130	168654	133584
M318T682			3.35356	0.467995	0.102473	317.997	681.592	308791	673201	236538	158203	199646	139063	178117	161956	190570	76795.1	146240	49140	71927.8	73005.4	73006.8
M186T65			3.35355	1.4912	0.0374497	186.103	65.124	66240	102630	148599	114298	145390	179309	282505	144516	174754	189224	156921	180118	202401	209181	209214
M189T37			3.35176	0.594156	0.271316	188.986	36.601	814135	285213	194941	662805	315085	99885.1	146812	144712	598127	72184.6	190693	256848	52830.4	52770.4	54221.1
M151T651_2			3.34316	0.621138	0.00832073	151.143	650.71	401891	344221	378652	282106	284866	310632	231208	190801	306040	184613	259573	71510.5	130125	130123	132644
M186T27			3.34192	1.04579	0.649824	186.103	26.958	549233	567336	475906	512651	535858	514559	515361	688304	597378	406354	670864	421761	359850	419445	417278
M637T49_4			3.3287	0.944553	0.880743	637.304	48.728	2.0645e+06	809790	620907	630577	653533	471365	668132	1.81489e+06	810193	507350	590167	568804	237828	241990	237818
M332T71			3.32637	0.291336	0.00974174	332.298	71.426	326335	247728	126755	105639	138353	100168	56354.7	56622.9	74515.3	39324.8	68339.5	9282.35	104983	103653	103650
M79T88			3.2967	1.3281	0.0093425	78.9183	88.29	140673	77102.3	164747	151523	134479	136076	171452	196100	158750	194122	168247	179921	134845	134929	138270
M287T37			3.2671	0.251393	0.0893211	287.023	36.601	96211	33242.1	41301.7	336449	162369	53764	48385.5	21976	14162.2	10714.3	30313.3	56290.7	15182	14754.3	15167.9
M704T335			3.26604	0.422315	0.467442	703.573	334.77	281841	2.14247e+06	172617	37882.5	56604.7	70975.5	442014	69556.5	39672.6	552167	34574.7	28616.3	394307	219652	339713
M191T985			3.26069	0.401552	0.200051	191.019	984.799	59885.6	45566.2	54823.4	425656	96273.4	137325	48885.4	62718.8	45293.9	47492.8	55689.4	69002.9	40813.9	41707.6	41698.4
M120T186			3.25032	1.54681	0.110748	119.976	186.012	71053.9	108819	162258	47883.8	180630	302632	165555	242416	224091	210027	337013	171689	225474	252247	355698
M447T76_1			3.24827	1.27801	0.116636	447.133	76.362	121656	200079	271206	175674	167411	189413	200127	317252	297511	176569	232658	214205	168472	168475	170296
M621T684			3.24759	1.37223	0.0330145	620.971	683.515	182182	270998	234436	243271	69986.4	204286	258371	258390	269162	266992	291004	309834	343224	377880	348742
M482T398			3.24711	0.65281	0.323041	482.324	398.45	172170	141447	753455	167116	436987	648446	162570	154372	468020	68255.1	452882	208174	99545.1	98419.9	98420.1
M530T319			3.24473	0.265325	0.173108	530.3	318.574	561104	422015	56093.8	22818.1	55260.4	44259.7	38919.8	33240.4	44017.8	27558.1	48841	115611	30021.4	30025.8	32001.4
M481T371_2			3.2174	0.499158	0.0589006	481.347	371.339	161885	68575.3	274180	226831	210227	128225	27533.9	110895	168244	16983.2	172472	37932.3	42326.9	58312.6	43309.6
M317T78			3.21123	1.40743	0.0482467	317.211	78.057	105450	115086	171191	33286	131754	136223	169531	164328	184989	184067	130289	142127	109546	111593	111585
M258T950			3.20697	0.321834	0.0581213	258.11	949.939	170761	643726	172762	127993	282985	142424	103804	115283	107925	51674.9	58506.8	58640.1	74283.3	75285.1	81874.5
M575T636			3.20284	1.28116	0.244261	574.992	635.546	115829	243003	71307.5	212899	205859	95800.8	212600	119014	231322	228661	164422	254291	138859	174018	173046
M1043T642			3.20092	1.40286	0.37719	1043.05	641.779	34545.3	111904	229219	117523	100367	127614	109001	179375	95172.9	134386	105225	388541	115814	117810	128281
M187T414			3.17442	0.42261	0.228505	187.041	414.42	141718	10866.1	91675.3	452138	126988	48003.8	57281.5	53832	108358	31398.9	65459.9	51927.5	32451	32475	33940.3
M508T309			3.16806	0.242143	0.106557	508.339	309.217	314322	324139	49799.9	34834.4	61015.3	33439.6	44263.9	35512.3	41869.4	25079.8	38514.3	12723.8	24924.9	24916.3	25865.1
M120T133			3.16268	2.02394	0.286198	120.038	133.424	406.839	412.49	208526	631.711	1111.19	159285	183351	179851	546.565	224796	1128.4	159941	186706	198643	198110
M478T323			3.15683	0.301144	0.158217	478.292	323.086	444514	384080	56262.8	21763.8	68971.9	44810.3	61113.5	45681.1	51828.6	47627	44325.8	56711.6	29105.9	29135.2	32798.7
M153T498_2			3.12045	0.626482	0.177959	152.995	497.774	609048	373963	268431	186764	348659	188652	246810	91622.8	422470	89097.6	283541	104083	118642	120104	121609
M184T930			3.11319	0.918215	0.588058	184.073	929.661	2.14593e+06	2.39728e+06	1.7092e+06	710086	1.81981e+06	1.61808e+06	1.58521e+06	1.48469e+06	1.94963e+06	1.27699e+06	1.67533e+06	1.57795e+06	1.09464e+06	1.12635e+06	1.12548e+06
M703T688			3.09829	1.37554	0.100773	702.974	687.601	175888	256868	307764	146495	286003	366456	498107	232267	305334	346984	447090	287821	342997	377400	342659
M357T67_2			3.08769	0.488406	0.005379	357.278	66.536	214793	195959	216866	110883	177447	125154	101529	67528.8	135893	49763.5	121526	32241.4	103077	103143	105990
M1051T771			3.0858	0.687725	0.0456082	1051.4	771.101	469750	670153	451849	397284	443909	441490	413096	433094	427590	283825	319261	99955.2	285679	286820	286821
M290T165			3.08336	0.0323461	0.322538	290.112	165.318	7061.39	3893.77	2272.88	389307	8745.74	2259.32	2268.64	944.275	544.691	2387.12	3640.19	3591.48	1483.37	1724.59	1727.04
M867T688			3.08308	1.2646	0.319758	866.98	687.52	132638	190870	472208	267193	488594	284537	461720	292698	268358	301535	420202	577347	323118	283006	283250
M556T310			3.07658	0.316433	0.131104	556.315	309.981	300830	367669	73411.9	23307.5	67344.4	45092.6	56184	46363	62808.3	29904.2	55708.7	26751.1	29898.8	29449.3	29895.9
M191T943			3.06886	0.39292	0.052195	191.019	943.213	85877.2	192833	81311.9	342745	155678	72487.7	43191.6	79988.2	44042	59411.7	74199.6	64949.5	39931.5	40134	43333.9
M221T544			3.0672	0.683742	0.014782	221.185	544.061	546048	645826	425449	365177	396201	389870	300151	317931	373323	227133	352572	321878	248752	244361	244326
M440T410			3.06415	0.251702	0.0155736	440.313	409.648	27955.7	147291	106404	246411	128336	77245.1	11444.6	43072.4	48219.3	5714.39	58754.1	17454.8	35525.5	28911.3	36076.5
M791T256			3.06023	1.06102	0.869839	790.573	256.465	351686	734791	1.54778e+06	3.08154e+06	2.5398e+06	1.10877e+06	979362	2.55215e+06	2.23732e+06	1.20649e+06	2.5158e+06	444685	950554	1.18805e+06	1.18914e+06
M415T828			3.03963	1.20906	0.234063	414.844	827.521	160357	246298	191875	78002.9	232212	187966	238681	249762	256013	245923	185102	150507	182543	185560	185509
M438T370			3.03825	1.46924	0.449392	438.297	370.099	219995	193384	71395.8	92293.7	90698.5	54443.5	439190	290089	55906.8	183272	59896.1	32750.7	273651	274255	274593
M186T1350			3.02739	1.20874	0.329966	186.104	1350.44	295189	127608	298491	268148	306691	231683	332280	194914	274663	277763	507815	259287	250826	250291	233592
M480T386			3.02564	0.658678	0.0954722	480.344	385.749	461854	493121	309482	377818	277743	188725	377513	290088	251399	133630	263115	73236.3	153767	169428	169497
M1031T688			3.02384	1.1266	0.70119	1030.99	687.751	50618.2	218247	116600	246375	524292	565643	232159	397676	316554	379082	232590	381692	348658	425403	425489
M436T628			3.01991	0.514855	0.0984899	436.023	628.429	187254	488554	215433	126537	194160	133189	130915	154765	191654	58716.5	118881	37613.4	33496.4	33398.4	33496.9
M343T77_2			3.01982	1.0839	0.754289	343.227	76.843	227859	418314	897095	169647	501449	528996	575880	324151	435426	445378	712231	480469	273965	280776	281970
M147T178			3.01687	0.231116	0.103177	147.044	178.303	54385.8	33295.7	28272.5	275764	79462.9	64788.1	24224	8535.99	33100.2	10092.3	26569.4	21349.2	11120.5	11280.9	11375.5
M464T253			3.01523	0.0140669	0.186605	464.312	252.728	429721	181163	2091.99	1383.67	2143.06	1449.47	823.683	1309.04	2749.42	1299.41	1560	951.087	1156.95	1154.43	1012.87
M262T798			3.01349	0.533111	0.0212041	262.128	797.661	280256	360635	262356	182249	328670	114486	193079	185427	119757	99707.2	162603	54367.1	75050.9	75054	76393
M705T291			3.00586	2.89	0.0147294	704.52	291.424	8844.2	9482.09	70284.4	71621.5	81201.4	63443.2	126336	127884	241328	67054.8	87773.9	230718	77139	69656.4	69802.8
M1029T771			3.00329	0.468962	0.0331181	1029.42	770.93	230756	299936	166268	88235.4	131572	126496	115072	94645.6	121084	40250.2	112982	5216.16	61273.9	61262.7	60137.4
M706T352			2.98246	1.92133	0.0976687	705.581	352.176	55001.9	109536	63527.2	46580.3	49731.2	59063.3	162621	241251	53137.3	151582	52287.4	75837.3	181112	181103	171021
M243T284_1			2.95654	0.783213	0.284684	243.062	284.372	1.23511e+06	1.22065e+06	617844	359488	712770	615835	613320	513302	792310	521984	708482	580020	407780	437856	408587
M676T366			2.9499	0.803596	0.453412	675.542	366.072	132467	220978	477009	504358	491838	384090	172231	255658	606135	168848	339510	234159	246288	246065	306099
M1125T643			2.94732	1.58143	0.354162	1125.05	642.858	25259.1	62497	86176.4	91881.2	58541	180726	49423.2	269027	60759.3	87033.8	49816	282690	58926.2	58070.6	58069.2
M263T61			2.93264	0.344408	0.0906643	263.022	61.171	165286	68092.1	38549.2	295451	134013	28790.9	32153.6	34734.5	96507.6	17468.2	34273.4	36342.9	15602.8	14962.4	15600.4
M293T79			2.92914	1.39836	0.211009	293.211	78.955	102618	91021.5	95104.4	21456.6	100854	212622	132164	128151	96520.9	179830	118319	217142	101059	104365	104335
M365T731			2.92611	2.43074	0.151593	365.105	731.265	83013.3	31420.9	36996	130372	65032.9	19643.2	208329	138452	51560.5	35925.3	73188.8	383357	37426.5	36783.6	36788.7
M438T387			2.90565	0.808954	0.584274	438.297	386.92	178301	175710	663545	464883	390323	269834	114226	96835.2	539397	61486.8	552372	368947	70119.8	75095.5	75061.4
M335T75			2.90518	0.0340008	0.27919	335.106	75.348	1676.87	3631.5	6331.69	570278	75520.1	2307.38	10174.5	8730.31	1379.72	767.03	706.66	673.609	1821.07	1824.58	1910.92
M329T277			2.89628	2.10089	0.0996188	329.233	277.074	58260.9	125873	25203.4	12401.6	27830.9	50161.2	58302.8	49632.4	52326.2	136705	202743	129992	42719.3	43167.9	43401.9
M557T700			2.88842	0.62315	0.00830689	557.017	699.995	247876	314385	239809	176811	212362	212693	165485	167848	190765	88761.8	177000	85004.4	126243	130098	130343
M272T932			2.87485	0.265261	0.0555799	272.089	932.04	215267	202443	329714	4764.4	88492.8	57552.2	48736	12515	91147.4	9615.91	50072.3	26179.7	19238.6	19417.9	19420.3
M451T574			2.87473	0.162891	0.15507	450.844	573.528	289688	302233	1636.15	83745.5	1544.15	447.988	102810	2281.87	1323.87	1352.28	687.784	2195.26	706.805	693.705	799.29
M311T42_2			2.86531	0.451029	0.233555	311.168	41.789	704232	221958	92641.9	125556	121990	88574.4	113267	98901.1	113358	103346	92400	89850.9	102750	92505	93384
M805T277			2.85626	2.32713	0.0374182	804.551	277.377	16110.1	19483.4	39164.5	64467.9	47217.9	120619	91508	168373	102227	59343.3	82874.3	210247	76967.2	88805.1	77620.1
M190T629			2.84575	0.497626	0.0639555	190.015	628.664	215253	300949	148916	76421	153399	73001.3	98050.3	87310.1	126440	39011.8	105286	25574.3	34688.5	36814.6	34718.7
M1020T383			2.84361	0.235804	0.122885	1019.7	383.335	454354	141789	95146.1	22311.1	96608.9	52096.7	59058	15974.3	52425.6	4602.06	58837.1	12438	63693	60824.9	62797.6
M466T377			2.83853	0.60874	0.276083	466.328	377.375	16854.5	19798.8	269863	228274	248119	181480	54218.4	46897.9	180766	32673.4	189709	82798	47033.2	46043.6	46051.3
M259T792			2.83624	0.714885	0.0917329	259.113	792.087	383172	349894	386852	300348	363812	350835	349431	321577	362894	45193.4	303738	143385	260717	257009	257007
M388T53			2.83463	0.318641	0.13319	388.249	53.025	286255	306007	570592	251403	3517.54	171872	3909.22	485541	1614.93	1713.97	1507.66	12239.5	19076.4	136592	138432
M961T641			2.82752	0.795073	0.560585	961.046	640.884	70250.6	632470	195974	595511	223184	475667	145002	344847	209111	254620	132265	657796	211022	196799	197219
M783T174			2.82174	1.28727	0.595228	782.568	173.816	63816.8	60608.6	101258	121640	489638	747235	226955	669653	201791	213807	325010	402069	141914	197862	197796
M518T55_2			2.81381	0.689694	0.0170298	518.492	54.73	317043	503150	446257	434843	413007	342293	309056	285013	373822	286124	316637	123645	378875	380524	378878
M293T679			2.80839	1.34668	0.148688	292.959	678.629	186541	200668	323396	283759	173480	124836	320807	109876	313534	355676	299427	341510	340933	339347	340933
M498T393			2.80409	0.526661	0.206426	498.345	393.236	72464.4	93759.1	359035	92955	387286	182465	40534.7	7716.03	185063	8939.24	205531	177871	26523.7	26526.5	27609.5
M123T109			2.79931	0.850874	0.252952	123.055	108.64	1.48657e+06	1.64267e+06	1.8604e+06	1.10434e+06	1.63067e+06	1.72132e+06	1.55147e+06	1.24833e+06	1.66004e+06	793873	1.79462e+06	989014	1.08171e+06	1.09348e+06	1.09333e+06
M329T250			2.78282	0.26895	0.257948	329.232	250.006	567772	256679	16663.6	8559.44	17574.4	40474.6	27937.3	41686.6	19661.6	48085.4	33329.4	73431.8	26956.6	17031.2	26963.7
M704T305			2.78083	0.0677364	0.17149	703.547	305.44	276599	487304	5117.91	4503.79	4309.85	14756.9	14144.9	9800.57	14646.8	3392.18	4556.23	7146.67	6135.88	6114.4	5522.63
M335T896			2.77079	0.445183	0.0517116	335.073	895.664	300630	450710	42444.2	291900	366182	269268	29362.9	303499	219050	118340	29183.1	66785.4	148442	147865	150407
M833T78			2.76094	1.11948	0.225224	832.583	78.135	276826	334656	278435	245704	317132	224561	293974	342558	393093	285263	259158	303677	220558	220539	223011
M233T41_2			2.74417	0.234907	0.0700488	233.012	40.6505	173115	32950.1	30081.8	229619	76083.5	24502.1	20243.4	18615.8	27436.5	6804.61	26029.6	33909.5	8245.13	8373.99	8373.44
M509T635			2.7428	1.53872	0.0166771	509.02	634.952	31057.2	52478.7	44153	92175.5	80294.3	90558.5	94884.1	109879	94700.9	114917	75338.7	111484	95942.2	91470.1	95991.3
M455T637			2.73802	1.45452	0.230452	455.012	637.39	9808.49	69039.4	36537.2	140389	112292	179075	112100	164265	138801	179697	49633	151333	117668	100376	99168.4
M338T53_2			2.7328	1.11573	0.618056	338.341	52.967	1.64503e+06	1.12222e+06	708700	1.49595e+06	980349	835921	652556	2.055e+06	1.62454e+06	976842	1.20487e+06	1.05998e+06	1.5113e+06	1.48932e+06	1.51125e+06
M676T340			2.72979	1.05632	0.946038	675.542	340.357	183552	416466	7512.35	3251.47	5740.27	4863.46	222667	164524	5743.65	253117	3992.32	6337.88	340925	294242	294041
M985T639			2.72222	1.0699	0.850747	985.007	638.794	68902.2	137887	154352	412322	155018	382856	142389	262322	151914	486545	162225	197608	156152	166394	166140
M305T49			2.71718	0.12249	0.168032	305.02	48.7225	32619.2	28434.6	1111.22	255418	79213.6	4232.78	5019.4	4068.19	4134.25	7776.03	12995.7	15128.4	5563.11	5563.17	5626.87
M535T388			2.71605	0.468346	0.0627986	535.152	388.145	189026	267814	130332	55417.2	91914.8	89806.3	64197	98969.2	83681.5	38947.8	89704.1	10562.9	42495.5	43827.7	43834.1
M677T381			2.71307	0.452244	0.0175754	676.545	380.643	97714.5	165961	128361	129891	116811	112064	17488.2	9365.2	143250	8475.31	86314.3	74653.4	8860.81	8880.63	10315.4
M354T628			2.71094	0.522306	0.0685981	354.021	628.429	169058	327756	171600	82460	158402	98671.1	95997	110085	143832	42562.6	98894.6	35086.6	28540.4	30326.4	28302.6
M232T517			2.70274	0.929626	0.828004	232.154	516.667	1.20033e+06	1.17763e+06	443141	239754	307070	360244	352004	669900	637573	483070	463909	859353	292876	289561	292891
M708T293			2.68328	3.219	0.00285825	707.539	293.238	13625.2	9708.8	43005.7	27878.5	35711.4	26893.4	83192.7	55271.7	116593	74009.2	44646.3	131100	50718.5	50730.5	51720.9
M113T317			2.67319	1.14574	0.338684	113.034	317.152	307066	713268	653883	463712	623575	593204	680898	528539	836959	474657	713612	608961	450538	458435	455023
M289T77			2.67169	0.097505	0.300552	289.101	76.9055	4493.92	8102.22	1956.63	286615	29166	5712.18	6696.27	6420.69	5121.25	6600.01	4027.05	3900.85	4160.86	4141.74	3200.31
M478T303			2.66249	0.073215	0.267993	478.292	302.858	89747.5	547929	11050.6	4022.55	9899.08	7617.82	7646.13	8402.31	11219.8	8399.8	9069.87	4335.55	5850.01	6196.46	6183.77
M518T629			2.6567	0.517153	0.108343	518.025	628.579	141025	422319	194939	120531	168984	97644.4	105492	136225	165280	52130.5	95726.6	37514.9	30114.4	31118.6	28837.6
M162T908			2.65635	0.517675	0.0138344	162.112	908.447	222041	313680	215428	136738	192086	349706	150236	147129	89840.8	101163	198008	53733.1	86024.7	85735.8	78872.9
M200T1202			2.64288	2.01541	0.130673	200.119	1202.39	36721	74305.5	73215.1	66239.1	66531.9	68442.9	71416	226072	134993	36708	262452	45210.8	65328.4	39767.8	65025.3
M1049T386			2.64096	0.460342	0.230987	1048.74	386.109	40423.6	2121.18	240787	83263	246802	123792	17113.9	7241.01	114752	1625.11	185388	13239	55665.2	55646.4	56544.9
M739T657			2.64083	1.21509	0.465949	738.998	657.003	316886	154935	228124	137064	182005	128604	389229	135397	256311	127762	335685	150079	163764	117473	160470
M757T83			2.64048	2.07408	0.315476	756.551	83.4735	55518.1	43661.1	103421	16564.7	143567	77798.5	43749.4	32733.9	263949	57981.4	48894	466386	49839.3	50456.8	49820.6
M755T283			2.63344	2.16889	0.0181591	754.536	282.755	9705.62	11936.7	65751	69627.3	73554.8	85068.4	81482.4	92740	159843	81894	93409.2	175228	77354	78234.3	78235
M184T739			2.63121	0.818301	0.438262	184.094	738.633	494206	495773	456064	121740	391217	372849	513534	388072	347834	216125	391222	51368.4	58765.9	57541.7	58759.9
M815T306			2.63093	1.70303	0.53939	814.557	306.144	6590.84	32108.4	39163.5	21272.3	142900	138895	31993	69438	44608	42355	25268	435075	38229.4	35437.7	37799.1
M178T362			2.62661	1.09631	0.712766	178.018	362.308	205110	329328	147791	34405	104670	147261	173595	179347	178873	196431	173432	160166	102381	102397	103913
M451T567_1			2.62617	0.732458	0.199248	450.92	566.713	593563	751665	391806	232444	362360	306449	289505	352112	460540	251881	316586	261811	103783	107716	115009
M867T711_1			2.62173	1.06273	0.69965	866.981	710.833	496965	348933	334392	193313	337886	202940	297205	410458	359632	356247	260855	350133	247305	189509	247151
M153T138			2.60662	0.262391	0.270339	153.065	137.834	647690	94164.4	45611.9	56930.7	69464.1	29806.5	27385.2	28726.4	107218	13378	34532.1	36370.3	11736.3	11765.4	12213.9
M222T479_2			2.60165	0.547045	0.241714	222.134	479.375	452985	193483	138386	46495.6	135756	79236.8	117510	43044.5	144432	51515.5	166335	49559	52189	54140.5	55013.6
M97T790			2.58217	0.679931	0.041196	96.9598	790.215	329925	438782	325469	380008	370592	190156	275375	217366	352053	151608	235350	151861	143447	146980	147267
M231T125			2.57473	1.65193	0.305329	231.044	124.931	105101	123448	59776	4367.13	33720.7	67585.2	94918.4	263522	42320.2	132092	18144	99861.4	65004.6	62786.3	64994.2
M985T654			2.55674	1.12328	0.537879	985.008	654.09	141639	214763	119133	158966	167612	150278	102602	239564	183666	193764	93528.1	256676	136563	148232	147979
M373T636			2.55076	1.38857	0.0359242	373.009	636.137	85381.5	83902.5	96047.8	51799.4	33222.5	72023.2	91674.2	107600	71349.9	100976	106724	108177	139046	110554	109075
M179T110			2.54585	0.261629	0.10987	179.057	109.516	57390.4	46190	35583.1	236178	110209	5649.01	10721	17919.5	11743.6	7168.49	37294.7	43664.5	13257.7	12601.1	13227.3
M568T363			2.54535	0.815179	0.654009	568.339	363.071	882127	111732	589013	230806	523512	85473.6	615609	510125	87148.9	263786	471036	27198.9	385726	369854	385893
M126T589_2			2.53911	0.886788	0.453341	126.021	589.093	1.46448e+06	1.49769e+06	1.15582e+06	841352	1.01459e+06	999550	934985	944556	1.17445e+06	789656	1.59671e+06	743650	674007	681024	669654
M466T391			2.53436	0.356465	0.00315935	466.328	390.73	100036	115993	89149.5	72751.5	80323.9	62234.9	7981.03	8180.31	64712.5	4918.96	70108.9	29634.7	9217.04	8293.66	9240.99
M480T297			2.53171	0.0329057	0.338799	480.277	297.132	2250.56	675901	3963.01	3183.23	7002.46	5306.54	7521.37	1696.23	4680.47	2576.38	2564.38	3916.45	4118.32	4281.92	4120.9
M274T77			2.52474	1.53884	0.17395	274.273	76.788	40495.2	59063.2	197143	313846	115162	102606	224800	98061.2	301122	201092	180032	269538	61677.8	59347.2	61675.9
M129T154			2.52402	1.84159	0.140279	129.019	153.852	60103.3	90586.3	116617	1269.55	38682.4	85718.4	73949.5	133576	246771	76069.2	149619	43717.8	56148.5	56222.1	61463
M812T79_1			2.52276	1.02416	0.919623	811.602	78.688	264016	295350	243345	206108	295035	647495	258022	343286	346220	307882	242871	500208	231787	231790	236303
M571T349			2.51433	0.245839	0.140409	571.358	348.786	343142	182388	55553.4	19109.4	42077.8	32118.7	22850.6	65053.4	27587.7	8572.96	39981.5	1745	82052	82931.3	81749.1
M701T639			2.51011	1.28429	0.610787	701.022	639.138	36588.3	30138.9	150747	357825	57523	64562.1	121368	233837	173191	41613.9	65878.1	259758	115552	107125	105903
M986T637			2.49819	1.97958	0.156364	986.012	637.475	24485.1	42524.5	41274	40218.6	23556.8	56806.5	34193.9	144757	54464	60534.4	9384.25	149725	71081.1	73424.8	63185.7
M69T45_2			2.49752	1.08875	0.539308	68.9956	45.247	255164	221199	192980	126294	156832	168487	252685	248321	190547	219113	160302	149469	147393	147591	151093
M570T355			2.49083	0.657859	0.311501	570.354	355.286	483552	508152	175068	413178	137204	93986	289542	195760	80315.3	201487	417862	6508.45	302007	306367	287448
M1067T639			2.48794	1.27824	0.474413	1067.01	638.818	46890.1	91246.4	118064	165369	91670.3	103538	87657	82809.7	125232	94339.2	94250.4	304102	121173	157652	123767
M166T187			2.47447	0.244326	0.0702835	166.058	186.601	61856	19328.3	27952.4	180165	93303.1	26681.6	7647.79	17648.9	12927.7	10389.4	35313	16072.4	7369.23	9750.42	7510.55
M807T173			2.46009	1.22398	0.513411	806.568	172.745	82472.8	116762	631128	712149	591004	582966	617827	955969	507613	216063	541617	485844	418114	487979	486394
M345T631			2.4515	1.08674	0.70886	345.015	631.113	166783	271734	211595	57973	85091.8	205339	202425	143070	121777	234441	171295	212119	174530	173984	183108
M293T828			2.44963	1.08456	0.690043	292.923	828.018	116843	222085	174803	38508.3	138113	132517	129748	192563	154785	153304	98063.6	163989	98271.8	101607	101585
M278T74_1			2.44927	1.54909	0.0633269	278.22	74.221	48414.3	63956.3	71525.5	20538	48550.3	59189	66555.7	103968	60747.4	123372	48075	80865.7	70441.2	76527.2	76464.7
M155T421_2			2.4427	0.791471	0.213759	155.009	420.666	792007	685467	759450	305239	667512	593325	644203	556236	676476	372887	526799	233364	360775	364852	367018
M782T80_1			2.4409	1.48996	0.0367824	781.556	79.779	84327.3	87028.4	88141.2	56976	89600.8	84536.8	77569.4	119669	145942	110472	92291.7	185046	62332.9	62397.8	62053.5
M836T74			2.43965	0.0237932	0.148254	835.562	74.224	236882	305558	1784.98	3063.38	2828.89	2145.93	2806.64	2847.13	391.234	1203.66	3681.63	2209.81	1823.52	1747.71	1747.94
M731T310			2.4386	2.04741	0.0447451	730.536	310.018	82757.3	51697.3	32181.7	38704.6	59352.1	48890.3	63048.8	93948.9	138187	65705.7	75466.3	205678	51598.7	52910.7	51604.1
M282T437			2.43783	0.398929	0.154531	282.155	437.459	117896	398816	76985.1	116940	79100.9	64170.2	23630.8	52957	148271	17613.6	49010.4	49165.4	5126.12	4627.16	4606.93
M791T78_1			2.43767	0.827166	0.32562	790.573	78.079	653483	999637	1.14179e+06	1.14639e+06	983837	709213	825375	1.10556e+06	915451	616472	983987	213689	805241	784615	784526
M559T331_1			2.43494	5.83779	0.227448	559.244	331.098	16477.7	60504.9	983.148	1147.06	3223.51	2794.27	1885.5	1521.45	205284	1163.82	285915	1204.92	1137	1241.94	1136.42
M500T320			2.43096	0.392955	0.0872238	500.276	319.659	178678	228581	59484	21842.7	66908.3	67309.9	38885.3	32735.5	57021.5	30092.7	51224.2	34774.5	33479.7	31974.9	31957.1
M135T300			2.42761	1.56787	0.214021	134.894	299.967	26077.3	55036.5	53249.2	81019.1	51830.8	66526.9	77697.1	72171.6	50775.5	59905.1	64072.2	198638	53305.4	52986.2	44412.1
M138T331			2.41417	0.45352	0.0590867	137.986	331.101	88253.4	177638	84803.2	44619.6	54604.8	200868	43920.5	52630.7	78539.2	36361.6	61897.6	21795.6	18620.6	34546.5	36826.2
M1067T656			2.39297	1.09228	0.424183	1067.01	655.744	92054.9	159207	148876	138193	145432	146845	149912	169833	135334	180125	101798	170255	107439	114310	114113
M483T80_3			2.39143	0.172687	0.156815	483.271	80.476	181223	229345	13712	10482.1	10088.6	13684.3	21458.8	10454	10481.1	9684.89	20409.9	6694.41	13797.5	8949.31	13801.4
M152T362_2			2.37594	1.28006	0.369999	152.002	361.704	244727	11410.2	244878	63549.4	232185	181602	277552	166410	295843	159888	198800	153854	124582	124751	135389
M123T389			2.36873	0.562207	0.134738	122.975	388.659	359246	164933	125114	91004	121549	114911	131508	98099.6	143481	47669.1	81807.8	46573.5	47769.6	50410.3	50388.2
M266T700			2.3626	0.726663	0.0459902	266.097	700.426	322710	376564	282273	196278	263779	269806	242012	235725	264545	159064	228419	113855	182137	185552	185141
M345T667			2.36028	1.11774	0.647418	345.014	666.947	289011	364076	110096	306294	321154	296664	509255	107504	323382	337313	421923	186580	149281	81144.2	157535
M705T145			2.35901	3.06321	0.0461075	704.52	145.198	7794.89	6341.88	27034	27216.8	32595.7	20878.7	36589.1	22760.2	61668.6	139653	30867.7	81749.4	17235.5	17246.2	16452.7
M811T149			2.35518	1.097	0.797717	810.597	148.718	63518.9	76921.2	112710	243387	217411	438435	132570	120589	362306	142648	204067	301984	161379	171833	163618
M333T214			2.35227	0.612659	0.556754	333.206	213.992	25644.1	40641.7	39721.1	34453.2	38123.3	360464	27480.1	16447.7	42766.7	74707.6	30870.6	137979	45673.6	48770.5	48714.3
M809T721			2.34778	1.74226	0.0122924	808.938	721.125	64988.9	15649.4	83248.7	38968.7	44826.9	90332.5	130013	106604	85866.3	94710.6	80848.9	90867.6	97822	97049.6	112404
M892T683			2.34571	0.396975	0.0117111	892.018	682.745	98490.2	216782	94953.5	100052	126557	68059	33969.1	67224.1	80679	36397.8	30994.1	30560.7	17524.7	21527	21527.5
M526T379_2			2.34224	1.70911	0.163312	526.292	378.565	84483.5	81487.3	45659.6	23308.8	43467.7	37185.9	192461	105423	57839.9	88234.4	46125.4	49299.7	85891.6	83569.4	83508.4
M247T679			2.33705	1.63802	0.049957	246.981	678.605	63374.5	52648.1	35117.8	37537.9	56438.5	32347.4	117538	54218.3	57690.1	39731.2	89354.7	95960	51513.4	61580.8	62221.3
M291T472			2.33656	0.501512	0.0549889	291.069	472.058	141286	92385.7	216862	142911	186900	71372.5	82626.6	80114.5	12927.5	9009.99	167559	74908.4	102116	85662.2	86051.9
M1087T711			2.33218	0.369312	0.0169373	1087.42	710.877	106444	126998	83227.7	40626.2	37545.7	54672	27779.4	47542.3	37620.8	13100.7	37339.6	2628.03	14894.1	15291.1	15291.7
M816T305			2.32927	1.80769	0.369619	815.56	304.781	19046.6	23331.2	36554.4	4518.09	45105.7	122683	14363.1	45470.5	32311.2	89036	47269.3	225712	26234.2	26187.1	25129.2
M568T692			2.32495	1.1223	0.407653	567.989	691.61	200897	157974	271456	306139	264659	285765	260978	336632	294515	183768	235714	357134	247794	247794	249540
M104T489			2.32204	0.828147	0.442936	104.106	489.463	1.93556e+06	458963	1.47654e+06	1.1267e+06	1.32663e+06	741962	1.20705e+06	679653	1.02963e+06	514895	1.38963e+06	1.03112e+06	691296	637666	670661
M793T175			2.32065	1.46258	0.443408	792.587	175.002	63120.9	95978.2	720169	362874	467010	283781	1.23815e+06	482792	288345	232563	558124	114850	692444	689399	869386
M1046T386			2.30839	0.410668	0.258265	1045.72	386.435	3076.51	3052.59	200455	42610.2	267542	83138.9	13593.2	10377.5	110508	1226.02	96758.9	13886.2	31439.6	31359.1	31439.4
M333T183			2.30791	0.478016	0.457979	333.167	182.595	3365.98	1936.18	1908.09	2241.16	304880	361557	1882.65	78969.1	2617.26	51840.6	186944	832.288	26660.5	26422.3	11951
M333T620			2.30356	0.83512	0.193843	332.894	619.657	1.51811e+06	1.68674e+06	1.08906e+06	889279	1.01173e+06	1.09658e+06	894632	1.09037e+06	1.29931e+06	859351	985096	960510	545297	545094	542733
M296T793			2.30144	1.37169	0.181356	296.066	792.911	122269	155062	62949	92053.4	98858.5	124584	264243	127384	95262.4	106885	137022	168728	117646	153797	115060
M353T567			2.2905	0.791912	0.349058	352.944	566.713	806071	1.02857e+06	337390	349131	501040	425263	420250	474025	643451	375831	440879	375654	159129	191409	190895
M497T394_1			2.28184	54.9758	0.24162	497.275	394.14	1196.89	3959.8	2348.63	5479.54	4700.92	14321.5	257941	29519.2	1.4328e+06	31139.6	3582.26	4642.25	181903	194054	193150
M376T53			2.27806	0.864861	0.395456	376.259	53.064	1.14597e+06	1.13976e+06	659578	611560	504537	611351	740861	604649	682910	638604	685089	689173	382190	375217	375204
M903T638			2.27629	1.05122	0.898677	903.005	638.107	75284.2	121753	109605	374796	108474	327120	138199	429805	89894.5	199592	113427	203334	195980	103409	198524
M544T365			2.2749	1.01749	0.954398	544.338	365.027	431355	233887	172534	50202.3	226569	96142.3	270409	254028	249834	134722	192485	130388	131025	131853	156623
M427T48_1			2.26845	0.0705756	0.0103162	427.283	47.776	47223.8	70583.7	96550.5	130405	31721.1	3923.74	10183.7	3888.75	1975.5	3047.3	5785.57	1966.65	1358.17	1358.31	1413.78
M361T710			2.25313	0.414758	0.0276313	361.137	710.321	111603	142749	58857.3	41515.4	72058.4	41083.2	36101.9	23998	53587.2	22633.7	42068.2	15662.4	16922.7	17560.2	16936.3
M498T374			2.24971	0.596155	0.550425	498.345	374.125	191106	565066	31489.8	25988.4	11090.8	26420.7	170446	149517	46241	91860.4	25609.1	23751	121470	119627	121475
M183T611			2.23994	0.673549	0.0116335	183.005	611.268	314445	300494	259112	235671	214274	172663	179938	186674	175451	176356	194967	94687.8	198322	198344	194329
M682T629			2.23836	0.52214	0.109602	682.033	629.019	84906.1	327422	144963	107641	125467	100531	73448.9	125386	127460	39390.6	67259.9	32244.4	24810.9	24812.2	24636.4
M239T628			2.23637	0.176174	0.256479	239.014	628.036	304627	61740.6	19804.8	8267.83	15827.1	8963.08	24533.6	5671.59	19280.3	2854.66	20169	1348.31	14634	16552.9	17127.5
M657T657_1			2.22626	1.11304	0.630518	656.995	657.212	333892	160913	192993	240228	264041	238386	433042	66962.2	268437	297761	230392	295559	201212	201804	214471
M204T666			2.22421	1.29936	0.477268	204.122	666.362	225811	87980.3	216647	155232	194798	107327	160560	416819	111708	377592	190685	26136	87795.3	87793.9	90715.1
M514T317			2.22295	0.45176	0.104286	514.305	317.005	21990	26281.3	149835	151921	155074	91404.6	63266.7	9764.06	17115.2	35363.5	117876	26091.9	70296.1	70568.4	70524.8
M185T273			2.21813	0.505631	0.00702816	185.022	272.731	46111.7	107247	97160.6	120741	79412.2	87553.4	51422.3	37946.7	73928.5	29235.8	57182.2	22428.2	29422.4	30192.1	30189.1
M329T300			2.21561	1.54304	0.150839	329.233	300.291	44191.7	54765.3	43625.3	18266.6	48992.7	58884.8	28428	62330.7	32990.9	112018	71583	107304	55814	56625.1	58340.9
M627T619			2.21367	0.782254	0.201455	626.824	619.096	752328	912805	504394	388578	452064	500140	373980	514519	639666	357267	435253	425267	187559	185225	185131
M153T161			2.20718	0.524454	0.153234	153.065	160.588	349879	150156	138622	266620	72456.2	52938.7	55628.6	39530.7	194988	42178.4	97217.7	110995	33157.2	25831	33141.1
M279T90			2.20577	0.944781	0.86802	279.232	90.457	301808	451025	159484	63938	157023	89696.3	136190	246381	133846	298041	141708	199275	158436	160656	164940
M461T871			2.20536	0.610365	0.0169474	461.189	870.826	191084	182209	146232	82129.4	130569	138483	99568.6	92126.9	126926	54214.3	102256	56356.1	58667.1	59414.5	58664.9
M505T783			2.20186	1.84074	0.0637357	505.168	782.937	20004.3	12096.7	32503.6	85337.4	47109.8	35654.5	47823.4	91746.2	56928.8	98891.2	34792.7	98169.4	121026	125918	125846
M493T632			2.19967	1.13456	0.273198	492.989	631.897	96497.8	80305.4	135045	149466	156595	142607	130866	175914	152332	144660	126954	132126	132937	120139	132951
M475T700			2.19172	0.672739	0.00777516	475.014	699.957	172833	229306	165955	160781	157673	163961	117268	143549	138383	89011.8	149412	69094.6	90078.9	96176.6	90132.2
M296T814			2.18668	0.470545	0.129583	296.066	814.039	147519	467718	162763	73773.6	150658	118167	123764	61386.7	145331	90164.3	52516.2	54130.6	67634.5	68233	64159.8
M799T308			2.17777	3.31005	0.309117	798.562	308.451	13158.6	20705.4	7432.31	9374.44	20434.7	33017.2	9996.5	23919.3	23875.3	30740.3	13262.3	242858	15415.5	17931.2	15394.4
M505T780			2.17292	3.90738	0.0226635	505.214	779.66	5358.86	7024.26	8339.28	42203.4	4590.74	9075.81	67122.8	6166.79	41579	87744.6	26689.6	69972.5	15873	50520.4	50313.6
M123T298			2.17014	1.04144	0.893599	122.975	298.496	258919	369655	135859	132527	161846	95269.2	336230	203726	299684	117947	143403	100907	70626.5	70448.9	86218.5
M796T78			2.16745	0.576127	0.0011003	795.607	78.135	101437	116775	151052	154556	157579	125035	79024.7	112407	77190.1	66491.6	78584.6	50910.5	89053.8	85053.4	88995.3
M111T421_2			2.16547	0.797422	0.300411	111.02	420.672	494341	568537	495377	180292	457956	353957	475370	364785	489801	232409	323593	147834	214613	233615	233471
M831T299_1			2.16349	1.84198	0.0580849	830.566	299.408	61731.2	52200.4	39640.7	40116.2	49809.8	61582.2	98827.6	49796.9	115864	55278.7	65806.3	176379	55406.3	55321.9	56915.7
M795T773_2			2.16288	0.750569	0.0545869	795.3	772.692	491626	698585	474802	455950	467166	495088	441567	483761	479500	383101	335364	190874	343647	344673	344668
M428T710			2.15908	0.640216	0.0537453	428.108	710.352	190770	234170	162954	107936	149258	126160	150516	120916	139147	70416.8	114156	26655.9	82115.1	83381.1	82627.7
M556T334			2.15585	1.66655	0.258117	556.316	334.004	70040.2	86887.2	83345.4	22282.5	73218	43414.8	207684	45070.3	52751.8	26391.8	208088	91948.5	116315	119737	119765
M650T690			2.152	1.06048	0.749448	649.992	689.99	142995	111088	196508	221226	193379	202221	188495	174662	223608	229421	61682.4	254107	179135	174603	179149
M129T723_2			2.14914	0.362596	0.00732954	129.019	723.226	46822.2	71433.3	36022.4	98821.3	56521.2	36153.1	20044.1	19306.5	31897.1	11906	36311.8	5910.57	13348.1	12319.5	13342
M476T59			2.14904	0.533669	0.228802	476.276	59.2705	277830	233978	88841.8	18527.1	51871.9	56568.9	73729.3	65232.3	63050.7	57426.8	79002	49866	53116.3	54346.1	59955.3
M532T317			2.14684	0.242733	0.154379	532.298	316.736	219562	163688	23705.3	9602.59	23337.4	17248.4	14437.6	13769.7	17338.8	10886.3	18781.1	35750.5	12336.6	12041.2	12336.5
M191T890			2.14574	0.271301	0.471244	190.978	890.013	688.257	980.613	2420.06	242610	4196.16	3099.57	2501.48	961.126	3525.63	563.03	1822	59535.8	29191.1	29065.2	2657.18
M481T42_2			2.14509	0.983493	0.960458	481.297	42.035	479231	218591	260442	89764.5	113661	186477	152964	214083	415523	182824	264842	95675.8	138222	126537	126449
M674T367			2.14492	0.823939	0.661424	673.527	367.251	11038.4	15870.4	176313	193974	270550	136257	42425.4	71719.6	234968	37829.3	122155	153352	31613.4	31789.3	33849.9
M630T645			2.13926	0.588672	0.0139758	630.133	645.305	149179	154932	133256	76582.6	95515.3	98765.9	86658.6	81012	87367.9	49505.1	82083.2	30288.4	54703.6	53101.2	54699.9
M731T112			2.13846	2.20577	0.115059	730.536	112.069	21779.2	25148.4	75269.7	130856	105536	169845	124245	132485	473047	103894	169099	162831	91957.7	89767.8	89694.2
M333T181			2.13286	0.685437	0.28761	333.206	180.977	121707	75443.1	298257	150045	263292	375737	136666	112439	306074	42074.4	178188	104988	60976.9	60985.2	62179.5
M77T1199			2.12193	1.21181	0.182277	76.9695	1198.9	91993.9	57853.8	93865.4	96531.5	107753	41958.4	126994	87926.6	90268.2	91600.6	102337	94606.8	97135.5	97319.2	107783
M812T301_1			2.11975	0.953843	0.830274	811.601	300.975	421060	459292	596854	428516	704486	1.03645e+06	634639	466377	884364	368742	401540	722683	613931	613800	637414
M329T179			2.11574	0.13238	0.358572	329.175	179.245	403012	1977	11014.6	5895.19	11990.7	5479.83	8048.89	2808.79	12941.8	10164.1	4640.34	19559.7	9519.2	9536.61	9885.93
M559T435			2.10995	0.790435	0.118852	559.15	434.653	701234	471446	626488	437302	423384	520940	440870	498992	522646	394437	452313	204953	303110	303096	318779
M707T315			2.10234	1.74314	0.0438048	706.536	315.431	78788.4	60372.6	28433.6	37287	34157.2	32743.6	55419.3	59306.2	108470	79505.6	50060.6	120994	47313.5	47523.6	46508.4
M757T308_1			2.1013	1.64318	0.0728203	756.551	308.072	58856.7	47560.7	51515	30220.3	48883.5	74606.7	47750.4	91576.2	95283.8	63807.6	60298.9	153368	60332.3	63876.9	60347.2
M471T722			2.09943	0.484918	0.0695751	471.15	721.581	104315	166531	79214.6	37936.3	65613.3	46647.7	55423.5	45473.2	64458.5	22625.3	47445.1	7158.3	25975.6	25993.1	26376.4
M304T301			2.09341	0.42665	0.278501	304.299	300.932	16886	166707	43214.9	128242	480776	49271.2	46738.8	27909.4	51756.6	1133.78	104093	145996	19784.4	19434.5	19368.7
M345T701			2.08665	0.805154	0.176722	345.199	700.705	612459	393878	592473	380223	539089	473643	496688	486666	482769	313622	454625	174461	360608	356686	360601
M835T78			2.0847	0.806322	0.117127	834.599	78.135	744479	1.07134e+06	1.19691e+06	1.17977e+06	1.05438e+06	827296	801141	1.11291e+06	831160	798768	890438	463325	968195	956142	968135
M236T682			2.08329	0.416686	0.0266698	235.993	681.875	116944	158209	74017.6	48343.8	68909.6	47036.3	19431.4	43407.1	60345.5	25473.7	48373.2	16920.8	24337.5	24337.5	24367
M635T69			2.08286	10.8297	0.360365	634.504	69.393	2112.76	2442.2	2036.69	5016.98	11335.6	2513.96	2539.33	1699.72	4204.88	2488.7	1411.81	263361	2073.75	2201.58	2088.99
M466T361			2.08041	1.47097	0.324115	466.329	360.593	115304	70767.8	57551.4	63831.8	62160.8	35313	179191	184958	40546.4	104574	67771	18599.8	136807	136807	135368
M494T380			2.07711	1.05432	0.919944	494.323	379.837	151978	225258	44677.9	20016.7	51944.8	30732.4	156629	217140	43354.4	69910.5	27980.1	38091	57112.5	55536.6	57699.6
M161T364			2.07637	0.036374	0.315192	161.045	364.479	367.03	377.792	1357.19	173060	10954.8	1026.21	1341.65	961.759	2061.82	868.173	618.091	955.653	792.754	806.26	775.789
M180T115			2.0754	0.144792	0.0223535	180.05	114.693	59761.8	16156.9	16266	81212.2	77260.4	10278.8	11133.6	2328.45	2869.14	1760.35	19354.5	335.364	8230.5	8224.67	9020.53
M272T688			2.07231	0.309955	0.0720797	272.086	687.729	127049	110410	36320.8	21653.3	41060.1	21024.1	9304.13	9516.87	51806.5	4754.59	25916	9516.12	2665.51	2832.29	2827.22
M267T430			2.07227	0.636094	0.267723	267.073	430.155	250518	399180	193143	77112.6	28592.3	140874	133765	132564	118326	129920	137397	41002.6	79548.3	63783.5	78977.8
M430T700			2.07113	0.713054	0.035902	430.103	700.034	247172	280979	247248	159512	189053	195703	187029	193186	164425	126381	188752	81220.9	131538	133081	131542
M516T316			2.07092	0.394642	0.00254516	516.303	316.271	55245.1	73970.7	59190.8	54855.3	58327.5	44154.5	26181.7	4461.17	40517.2	14060.4	48746	2478.7	26714.1	27069	26719
M276T800			2.07088	0.61175	0.486591	276.144	799.934	678703	169618	118538	64748.2	50713.7	80834.3	66204.3	225245	114200	210472	77291.5	18146.9	182243	184267	184261
M538T43			2.07085	0.407998	0.0288167	537.523	42.9435	153221	125958	52843.6	98939.5	54215.6	43633.5	57581.9	35747.4	25524.6	21450.2	65986.1	9463.74	96898.7	94957.7	94904
M367T284			2.0708	0.438227	0.148906	367.045	284.232	184312	158678	51049.7	22353.3	40593.1	33905.2	38095	32269.2	51529.8	21031.4	52494.2	19702.2	15496.2	15503.2	16081.3
M674T354			2.07053	1.38596	0.347575	673.526	353.92	116058	83550	76076.5	71350.3	82869.7	60612.8	136958	243395	76176.9	135131	49488.8	38686.3	178998	178881	143052
M353T594			2.07001	0.0160403	0.323179	353.114	593.745	524.298	1258.34	1934.69	323607	10420.7	981.792	2062.7	1187.41	801.985	473.234	615.564	292.362	542.063	545.486	520.775
M129T714			2.06822	1.36717	0.0893205	128.952	714.297	104800	60031.9	85138.9	36114.6	97694.9	78615.9	119951	110962	79065.1	144413	105529	72255	124610	125089	125556
M412T855			2.06767	0.844879	0.66021	412.113	855.342	309584	400262	214759	177002	204793	143675	114017	120308	482423	76905.5	375076	56408.4	73173.6	71209.8	71212.4
M646T683			2.06622	0.534506	0.109552	646.008	682.725	111222	345529	161222	111586	136366	101142	48721.8	159094	130798	57373.7	79451.6	41464.3	33782.2	29907.1	33666
M79T847			2.06542	0.974419	0.871026	78.9589	846.764	195373	372964	318871	135760	293993	230099	277888	276522	311318	211318	219154	211285	179302	188501	188305
M508T330			2.06132	0.605993	0.251956	508.339	330.121	53472.7	70683.2	367806	140011	338755	211738	194993	158110	53533.1	83133.9	213717	13079.1	155869	156009	177060
M529T620			2.05651	0.803808	0.222479	528.847	619.69	735688	903473	513855	398718	467610	491377	394823	527611	637296	377423	450316	434479	213090	211762	210836
M165T136			2.05464	0.093737	0.378723	165.093	135.789	350044	1718.51	653.352	1182.33	487.695	1067.4	733.542	1085.46	10265.5	1678.84	18112.5	1415.21	2189.99	2551.65	2005.11
M279T362			2.049	1.53329	0.628315	279.038	362.084	33309.2	355456	16507.8	13340	21881.5	17922	287758	17170.4	52165.2	12098.1	319692	13999.8	34503.1	90800.9	35543.2
M690T353			2.04759	2.37187	0.0672035	689.557	353.234	15931	32781	22100.1	17219.2	14669.4	18582.9	60760.3	76128.2	18415.5	91189.7	15319.8	25855.6	55914.7	64771.7	55711
M175T1193			2.04642	0.71641	0.0106552	175.118	1193.39	377589	260580	430987	383474	334415	254266	270518	216609	242929	213331	246790	272238	242932	236588	242666
M600T629			2.04366	0.57788	0.0810444	600.029	628.899	96967.6	266024	158814	107458	129718	99970.4	83034.1	122784	136832	41965.5	74185.2	37570.9	27982.6	26626.1	26614.2
M903T655			2.0426	1.00476	0.982438	903.004	655.155	290418	136402	208378	178164	153039	187451	213050	222029	86129.5	252492	96988.6	288656	128892	150602	119566
M177T628			2.03799	1.20545	0.374411	176.874	628.155	348288	83026.9	313360	140041	307090	246986	321855	138365	335285	310358	326624	301908	253401	253295	192943
M375T717			2.03107	0.583275	0.104386	374.962	716.83	458126	199808	320881	329571	539260	537418	37085.2	225521	224981	562974	99964.4	240622	108615	108832	96624.8
M817T315			2.03034	1.89694	0.0545207	816.573	314.655	20414.1	18544	24732.2	14205.6	36995.3	65981.4	30714.9	69730.5	29703.1	69763.3	54318.3	88874.7	34143.2	34404.4	34401.7
M512T700			2.02922	0.687326	0.0108203	512.105	700.467	205907	218242	189297	125106	166611	158189	124997	142618	153598	103355	126741	79559.3	103859	95653.9	103811
M181T539			2.02861	0.240286	0.0239826	181.071	539.176	109951	30844.4	39945.3	75074.1	46652.3	9396.96	17382.3	7118.07	12269.3	5331.22	25339.5	7496.4	12727.2	13155.9	13157.1
M833T264			2.02724	1.15836	0.634567	832.583	263.543	138413	220963	712067	709097	928508	579379	904380	873252	323516	711501	812567	183984	607974	570057	606149
M502T397			2.0271	0.737221	0.433727	502.291	397.164	45473.3	75382.8	262879	129771	142131	232542	58232.9	37349.2	202641	22141	145481	188940	25135.7	25299	30108.8
M557T104			2.02582	0.399384	0.0143249	557.298	104.496	111244	77532.1	97020	55253.3	32335.3	46314.8	23937.6	40341	28990.1	15099	52248.1	7005.24	49372	47597.4	47326.7
M838T75_1			2.02136	0.580018	0.424445	837.562	75.0955	299480	14371.4	13737.1	13229.4	319039	248446	24474.6	27294.5	200359	12837.2	251212	10654.4	187381	187433	42142.5
M202T40			2.01945	0.206832	0.042559	202.017	39.9625	64281.9	23445.7	13800.1	107889	51339.7	10782.7	4784.27	4094.34	18553.4	3526.25	12716.3	12488.3	4434.75	4774.99	4790.06
M509T80			2.01726	0.439235	0.0801983	509.286	80.034	104999	151402	55664.2	25765.4	40774.8	47201.9	40139	38357.2	51189.6	16860.1	29740.5	10743.2	37782	37788.4	36868.8
M831T78_1			2.01585	1.4942	0.0822505	830.567	78.1515	83532	60721.6	49852.6	31942.8	58965.7	53103.3	59524.9	63465	97157.3	85634.6	60129.6	139304	48206.9	48218.9	49092.3
M1149T639			2.01561	0.713472	0.370077	1149.02	638.65	27484.1	55340.8	67479.8	204780	85145.9	174437	44911.7	75087.3	52364.3	126566	59318.2	80300.4	104331	125437	102912
M142T918			2.01301	9.84626	0.0202606	142.005	917.967	1916.5	1035.1	950.259	20365.7	847.534	441.842	71606.8	397.192	1151.66	52686.4	58974	66824.2	36927.4	37154.8	37455.4
M483T380			2.01202	0.297305	0.318406	483.362	379.849	147086	404165	12028.9	8493.92	12616.7	8010.26	75449.6	30165.8	9376.38	48893.1	10909.6	1329.13	16283.8	16497.4	16577.5
M214T41			2.0073	0.299029	0.136304	213.963	41.151	23719.1	28430.6	53378.4	177475	112337	4973.46	6254.31	4329	5482.18	25991.3	7517.75	70130.7	13179.1	13174.8	13476.8
M530T339			2.00726	1.40976	0.489227	530.3	339.23	111427	106887	120651	34139.6	109112	81474.6	49779	48361.7	80160.5	40783	350246	225339	204506	204547	208993
M978T689			2.00342	1.66259	0.0267683	978.005	688.528	65577.1	25677.3	50991.5	102550	20621.8	56518.5	77915.6	107555	98223.8	103477	72591.4	75485.8	73720.1	72933.7	73728.2
M543T611			2.00339	0.563682	0.0131055	543.171	610.714	167596	156956	126553	121123	98342.3	65843.9	85168.8	74734.4	69133.6	73338.1	86595.5	26133	96486.4	95983.7	95983.6
M243T333			1.99989	0.595739	0.422401	243.062	332.925	65699	67164.9	41406.9	22753.1	67459.4	332291	36838.7	43415	98468.2	60834.3	71096.8	44868.6	26144.3	17845.1	26088.9
M427T701			1.98943	0.749848	0.0641016	427.202	700.6	271451	297546	261813	204753	190127	236749	224481	220007	214928	138815	216177	82197.9	155555	153848	155564
M283T405			1.98266	0.109534	0.0532379	283.082	404.57	100295	21413.7	7291.91	90033	32866.5	3495.9	2569.33	4046.53	12224.8	1307.07	2285.29	5541.64	1142.37	1199.62	1143.56
M842T301_1			1.98061	1.70326	0.173964	841.576	301.377	18100.6	25177	65473.3	29257.7	71810.1	88276	124859	152434	35570.2	44606	40175.7	110089	37785	37633.7	34579.5
M575T662			1.97956	0.632505	0.171454	574.992	662.001	130496	366661	295711	295326	96970	292657	232644	329359	122450	102661	37437.1	110177	233871	257544	257277
M191T1009			1.9765	0.465126	0.243794	191.019	1009.01	28328.9	54900	23457.6	209972	65628.1	33362.4	18994.1	69468.1	23428	23406.3	25088.3	32944.2	34105.4	41358.2	34249.6
M317T73			1.97534	0.732084	0.675197	317.148	72.998	2326.28	174178	307124	75018.9	283406	1023.44	1324.55	1015.79	386134	873.791	224660	3195.36	844.926	1107.23	936.276
M426T332			1.97108	2.95021	0.183189	426.357	331.982	121978	119643	72679.8	38867.7	69937.7	45532.5	153727	139060	743578	84493.4	218443	43283.7	91062.9	95483	91149.8
M141T719			1.96353	1.24564	0.254859	141.017	719.278	79734.4	23661.3	113436	116301	79907	83802.9	125150	135572	100279	92522.7	67928.3	97434.9	64460	88048.3	88759.9
M259T877			1.96312	0.731946	0.241318	259.022	877.357	275874	366592	268674	59916.1	216714	169841	175844	114827	264432	112718	185022	140853	87014	87674.3	87673
M89T438			1.96034	0.593491	0.303061	89.0239	437.575	113028	39536.2	64233	246237	68423.2	46575.9	29592.2	68185.5	136452	22374.4	43993.2	42460.7	15700.1	14179	14279.9
M255T566			1.95607	0.754838	0.156873	254.967	566.348	422248	533253	302453	222060	282369	243752	242162	266438	348710	198073	247362	211560	107276	108742	116410
M805T79_1			1.95353	1.30936	0.0549543	804.552	79.034	77823.9	75624.2	71762.2	52666.7	75769.8	58321	70555.4	113154	94001.3	78651.4	66532.3	116521	51669.9	51673.9	52222.1
M151T390_2			1.95185	0.686388	0.269551	151.026	389.562	507241	325833	221758	111698	144130	136570	176561	103412	209534	115950	184246	203658	99096.5	101044	101001
M537T642			1.95048	1.26139	0.599885	537.015	642.377	44224.7	50873	17100.9	184194	22678.2	182131	76437.4	169870	128467	44052.1	40117	173265	186423	143565	146485
M186T1300			1.94982	0.995275	0.957366	186.104	1300.45	249812	201434	210806	140777	228059	216553	182684	223242	237899	216076	205432	176215	191636	194681	211486
M549T567			1.94451	0.713618	0.188498	548.897	566.713	299760	384810	193460	115357	172372	152497	137016	173235	228414	127911	147640	126515	41987.1	46615.3	47830.2
M833T195			1.94419	1.40239	0.354771	832.584	195.144	13542.7	19750.2	287135	207968	116467	163548	104163	83910.7	247358	172937	302895	222440	159724	160526	189593
M381T48			1.93808	0.0508157	0.00738137	381.337	47.937	51321.3	42793.9	90065.8	69113.9	20614.7	2100.07	3025.3	1117.38	2216.15	5395.77	1013.38	1257.65	1347.67	1217.48	1233.25
M357T73			1.93708	0.0810713	0.110328	357.114	73.2235	61429.1	5913.85	3639.97	117095	23073.3	2529.3	1492.08	1633.31	3347.66	3340.59	3266.04	4243.67	2564.72	2607.65	2607.31
M400T682			1.93352	0.537369	0.0833245	400	682.18	106741	214804	92591.4	62520.3	87135.1	59755.4	69989.3	65000.5	74011.3	35355.4	68935.3	21783.2	22191.3	22247.8	17095.9
M161T363			1.92893	0.0370971	0.340991	161.002	363.255	1330.51	721.315	1439	155566	825.571	621.407	1165.04	675.115	898.103	638.167	1441.89	1135.93	1046.65	1068.47	1046.71
M619T638			1.92808	1.20254	0.465159	619.018	638.497	77510.9	120122	92991.9	157553	88677.8	101647	48408.6	118537	183323	66179.1	208536	142840	115800	70889	89087.5
M1050T386			1.92197	0.331486	0.110463	1049.74	385.549	1996.51	14660.7	88779.9	43312.8	113992	45683.6	4792.3	2009.77	41093.6	570.599	48436.7	5335.68	20768.6	21145.8	21140.3
M731T85			1.92124	3.7061	0.0999561	730.537	85.4335	55116.7	36894.7	10453.5	7251.27	15471.3	19748.7	175200	7444.49	30879.1	50285.1	219798	53541.5	50427.3	51407.6	50432.1
M362T69			1.91689	1.49199	0.173795	362.236	69.005	50422.4	65556.6	28292.6	6251.59	32529.4	35271.9	52851.7	31736.4	29007.1	72322.2	54376.5	85443.4	41164.4	50677.5	50638.5
M789T78_2			1.91534	0.287884	0.196615	788.557	77.7095	187962	212306	5203.35	7720.3	9510.88	73963.1	112862	8462.71	5772.11	4542.2	4504.45	6839	117972	122221	122219
M480T364			1.91463	0.759458	0.435424	480.344	363.587	591373	256265	805834	253026	782866	152200	508950	327952	650845	289842	202727	177732	137179	139446	204101
M785T235			1.90936	1.34414	0.551011	784.58	235.48	16365.4	14541.1	307064	61329.7	71809.1	103509	85101.4	218633	56202.1	217152	72860.9	122418	105630	116598	105895
M415T58			1.90751	0.276739	0.156003	415.211	57.728	63852.4	41859.4	31139.4	233120	38843.3	15271.2	17407	22380.4	36285.2	11738.4	15159.5	14390.6	7975.03	8269.67	8269.57
M135T366			1.9043	1.29652	0.20565	134.894	365.956	16572.1	29277.5	67738.7	88760.2	77018.3	85885.9	87835	76040	62985.9	90511.8	87715.4	68469.4	93444.4	89587.3	89588.6
M311T700			1.90386	0.691807	0.0226089	311.008	699.905	176117	222467	189417	151577	191285	127465	141571	154298	133588	109011	139927	53764.5	100583	107741	100633
M335T219			1.90318	0.523843	0.282927	335.221	218.899	121443	76118.4	98425.6	60677.9	105292	463383	62763.5	51369.6	119824	21243.7	119492	110041	41442.2	40440.7	41448.4
M235T620			1.90125	0.854208	0.18755	234.917	620.087	1.50572e+06	1.67139e+06	1.14441e+06	964636	1.0516e+06	1.1393e+06	944073	1.14688e+06	1.31418e+06	917140	1.04546e+06	1.01923e+06	605571	601159	601064
M738T304			1.90059	1.47974	0.156393	737.531	304.158	12470	7746.54	67633.5	65558.9	41089	61167.1	30421.3	80865.5	52808	69817.8	74842.1	69562.1	68070.2	78175.7	68053.9
M712T645			1.89928	0.627017	0.0202	712.136	645.305	148373	139280	136867	77544.7	104571	93534.9	87204.3	81203.5	97943.8	51548.1	89493.8	31625	54977.4	55402.6	54977.7
M260T450			1.89888	0.531654	0.242171	260.185	449.57	403227	278242	178552	47081.6	153733	1167.31	130493	1707.16	12375	132459	162275	125310	68479.8	66064.9	66072.8
M448T75			1.89667	0.0565379	0.160302	448.339	75.421	223117	106865	3405.28	10898.1	6118.37	3862.27	3419.85	2311.72	3823.58	2312.01	3825.16	4337.14	2078.02	2206.02	2115.92
M291T636			1.89237	1.30514	0.170676	291.007	636.414	58057.2	56112.6	74010	76890.3	76194.2	45436.1	64440.6	90539.5	142176	69408.6	69123.2	69010.5	105094	80551.4	79324
M240T438			1.88753	0.370831	0.0241116	240.101	438.296	93970.2	95401.9	57671.5	33861.4	37899.4	34926.7	22010.3	2530.56	39671.6	1910	45436.4	19615.7	19895	19896.5	20271.2
M427T635			1.8802	1.20932	0.413555	427.017	634.789	81843.3	36478.2	121004	46032.3	113394	122081	132778	50635.1	76989.1	144442	105886	119125	107650	110177	109899
M445T61_2			1.8779	1.47027	0.504305	445.186	61.16	25997.4	26878	216542	31765.2	22324.1	46287.1	22903.7	205726	41266.6	46844.3	122235	104722	38817.9	39902	39865
M494T395			1.87468	0.648993	0.394878	494.323	395.023	61654.5	72072.5	178098	54748.2	313988	116398	40443	7045.88	202849	5661.29	122828	138393	15892.6	15899	16160.6
M764T629			1.87078	0.533493	0.114063	764.035	629.019	62086.3	246707	119161	90357.4	96223.8	77591.6	52934.9	107572	105368	33664.8	43348.8	26357.7	22236.8	21528.5	21530.8
M498T394_2			1.86877	0.0783486	0.147632	498.29	393.512	13926	2065	178025	875.395	185442	2636.79	20963.5	1072.98	2668.76	680.277	2892.15	1727.54	9610	24952.3	24439.9
M762T779			1.86498	1.4217	0.0434519	762.27	778.545	30051.9	32559.1	58283.9	54872.9	61596.3	66264.8	75334.7	78753.1	64338.6	98352.5	49268.5	65620.5	109048	109037	113029
M528T275			1.86455	1.45318	0.235248	528.271	274.584	15853.8	12658.2	76187.6	15876.9	65218.7	105362	67698.9	83269.7	92363.2	63287.8	44102.7	72382.6	34785.7	30741.5	34701.1
M104T582			1.86431	0.467474	0.35961	104.106	581.798	359989	81987.4	38335.5	25850.1	33639.6	43433.2	64052.2	29548.8	53744.9	21208.4	75244.8	28847.9	55897.7	67888.3	54142.9
M791T181			1.86106	1.29921	0.564344	790.573	180.571	80983.7	145410	2.04644e+06	1.12804e+06	1.48236e+06	259973	1.41547e+06	1.824e+06	542098	819949	1.81167e+06	268939	1.24637e+06	1.22399e+06	1.24649e+06
M345T735			1.86036	0.599368	0.0626633	345.199	735.105	110464	134426	100933	82102.8	97109.6	62667.9	71829.8	58998.3	126712	35013.5	45898.2	13798.9	40286.1	40302.2	11328.4
M160T763_2			1.8598	0.952396	0.623744	160.133	763.13	1.41976e+06	1.32745e+06	1.13063e+06	1.15095e+06	1.00634e+06	983869	799909	1.06628e+06	1.04477e+06	1.10806e+06	1.40733e+06	1.25853e+06	1.02241e+06	1.06894e+06	1.06909e+06
M123T88_2			1.85902	1.00574	0.969813	123.055	87.866	1.24794e+06	917923	2.00572e+06	1.33226e+06	1.80376e+06	1.99882e+06	1.65941e+06	1.37177e+06	1.81974e+06	1.29856e+06	2.04271e+06	1.16765e+06	1.30989e+06	1.30994e+06	1.32057e+06
M457T714			1.85888	0.775815	0.145716	456.965	713.862	565366	383357	541742	857730	415496	453489	486151	404621	376118	429487	494048	305512	346643	349214	281515
M163T138			1.85602	0.397414	0.0105001	163.018	137.971	61174	88087.5	33529.3	77157.8	94966.1	28683.8	35915	24573.4	34820.4	22671.9	5451.28	29015.5	26914.9	26908.7	27635.2
M1018T386			1.8526	0.317032	0.102933	1017.69	385.818	85845.7	195586	54782.8	14827.4	54310.9	23591.1	24977.9	28186.8	29273.1	5717.04	32536.7	15297.6	27277.8	27278.8	25228.9
M506T311			1.85194	0.288675	0.150625	506.323	311.377	108434	139394	19212.6	6133.56	23927.7	11673.6	19188.1	16627	22407.7	8717.3	15172.5	7023.32	8959.47	8962.9	9364.63
M273T334			1.85159	0.763998	0.214399	273.084	334.06	320400	482341	416225	178129	365749	299234	314580	138413	367937	271041	358386	125066	99625.4	120055	120039
M520T382			1.85063	0.702361	0.547615	520.278	382.438	16466.1	25592.3	185837	64827.9	176819	120984	15290.5	15731.3	196852	14292.6	168009	4587.15	11436.9	11462.6	10841.5
M844T693			1.84941	1.60426	0.0936266	843.522	692.824	36356	35883.2	22638.8	35596.7	28927	42729.4	37624.1	44018.3	62734.1	73898.6	17377.8	88618.7	36858.4	34811.5	35620.5
M317T712_1			1.84693	10.9635	0.353288	317.082	712.03	4620.91	6786.35	5447.19	8329.46	8491.17	7503.27	3930.46	6705.16	426433	4982.24	7299.1	2108.55	5361.29	5732.22	5729.2
M502T372			1.84133	1.10331	0.824254	502.292	372.219	100545	167673	64204.9	28880	54660.3	67448.7	152363	197996	9929.21	91024.9	13953.8	68087.5	75883.9	75918.1	83543.9
M113T64			1.83763	1.08097	0.733037	112.985	63.815	227419	155894	128932	88024.6	105623	125360	180944	256014	125443	140081	86173.7	109904	63096.6	63060.2	66185.5
M198T252			1.83329	0.280833	0.148711	198.113	252.498	102139	3979	6498.59	111804	46528.4	7021.16	7797.48	9410.34	45157.7	2369.62	4742.43	8585.63	2645.28	2646.02	2602.77
M346T664			1.83204	1.60803	0.0872023	346.018	664.175	20021.1	59620.3	11985.7	36123.1	19341.2	10117.6	54797.9	28972.6	40914.8	40578.8	46422.9	41110.5	37179	37218.4	30870.2
M276T329			1.83135	1.3652	0.413034	276.039	329.331	38601.4	147129	47404.7	6555.94	24518.6	112770	130002	112584	76656.5	104092	33840.4	57477.5	22342	26788.5	26934.3
M281T119			1.83097	0.257458	0.243097	281.212	119.406	18033.8	311624	66807.7	80209.4	2534.04	9836.37	54756.9	48413	6886.74	4663.32	4535.02	6653.8	12556	42501.7	42068.2
M809T151			1.83018	1.10019	0.721163	808.583	151.486	128033	178457	807082	517708	494050	292231	459065	518815	561341	325675	367720	427166	460970	476513	476809
M175T1073			1.82892	0.783387	0.60784	175.118	1073.26	454217	302001	776709	214027	298493	66911.7	727207	85649.2	429086	163423	83001.6	166427	81028.3	78671.2	78631.9
M720T380			1.82837	3.94775	0.021213	719.565	379.848	7737.81	9671.95	8131.7	4737.53	7714.05	6771.71	23288.1	16706	19704.8	44972.3	10416	61632.8	8642.64	9167.85	8640.95
M454T400			1.82469	0.298564	0.0246647	454.328	400.195	39470.5	85593.9	109079	23510.3	42836.7	31852.5	17934.2	10636.1	22058.1	2973.46	36660.8	8962.89	9176.72	8938.42	9174.97
M352T209			1.8243	1.01695	0.977403	352.22	208.711	17617	15064.5	63360.5	18806	80205.6	321641	78234.8	41553.3	111875	64558.1	95875	133356	43363.3	50241.7	50204.5
M813T301_2			1.8204	0.813358	0.566829	812.608	301.272	218955	364922	321909	178393	347910	937431	230843	275214	540398	168865	348644	363305	287865	352987	353476
M947T638			1.81734	1.60317	0.17161	947.032	638.107	21392	25637.9	32039.1	42433.3	26405.6	34798.3	25558.1	74669.4	29657.4	27885.9	38739.6	96399.5	45004.8	26595.1	45429.3
M613T682			1.81659	0.326604	0.0726133	613.003	681.592	94077.7	161180	55039.4	20839.2	43430.4	21691.7	26000.5	22550.3	30547.4	13715.7	24463.1	12142.5	13840.6	13482.3	13843.2
M293T480			1.81481	0.25767	0.242548	293.207	479.709	186182	61471.2	17776	3524.26	15613.4	8743.91	8770.1	2722.52	21129.8	3228.08	35304.7	4421.97	2951.49	3141.76	3245.88
M519T840			1.81173	0.26675	0.0650513	519.05	839.908	76576.9	85834.5	38790.3	2720.06	26879.7	11733.1	10378.7	5055.19	24161.3	3636	16860.1	4604.81	2745.76	2745.78	2907.83
M304T72			1.80984	0.251498	0.0173606	304.266	72.444	106960	66258.6	40883.9	22497.9	37429	27447.6	14936	13459.7	18355.4	8175.44	19258.5	1635.72	25025.6	24158.2	24156.6
M122T41			1.80744	1.83342	0.0734219	122.096	40.876	21494.1	47735.2	33520.8	26570.5	32469.9	33321.1	77790.8	91492.4	33752.3	23475	36221.1	94989.9	105510	75363.8	75080.7
M344T61			1.80727	0.586983	0.5265	344.153	60.506	38350.2	31566.9	19420.8	206793	43917.6	8344.04	15239.7	21576.8	136458	7853.25	9554.2	13818.2	4009.07	4078.95	4078.41
M544T384			1.8047	0.914418	0.806769	544.339	383.534	178500	90000.3	333952	124321	363970	389322	118512	101122	431497	43290.4	298876	360099	32325.3	32402.3	34847.6
M423T675			1.80353	2.23896	0.114054	423.11	675.437	24479.9	9004.46	11248.9	31025.8	23155.8	7655.21	74245.2	30333.6	14067.3	11897.6	29001.9	79060.8	10753.1	11700.5	11716.6
M725T78			1.79948	1.46201	0.182838	724.525	77.598	37510.2	47062.6	39079.8	36431.5	49090	56180.8	47939.5	54956.1	48758.1	55826	46682.7	133788	44100.2	44119.7	45204.2
M339T182			1.79733	0.360078	0.0544129	339.032	182.069	44303.7	118849	55910.5	23361.3	39616.5	23434.4	27914	24631	16672.6	13448.8	23267.1	4061.45	11021.4	11672.5	11679.8
M452T700			1.79675	0.745812	0.0536868	452.085	700.467	211236	231169	178369	130544	160739	148569	162816	138223	161662	94073.2	145288	88966.5	106179	98571.1	98549.4
M436T331			1.78891	0.766774	0.528004	436.282	330.919	81469.5	85233.7	569972	422771	724727	333278	376972	322166	449093	44357.2	466649	41047.5	319130	330428	330409
M615T49			1.78769	1.36455	0.264799	615.497	48.646	58052.4	89542.2	28578.1	21122.6	36293.1	41638.2	41213.8	64249.7	44514.5	105701	48207.6	71672.4	56525.5	56515.6	55677.3
M194T248			1.78694	0.392064	0.408801	194.045	248.079	23645.4	17626.7	6803.35	180188	15392.3	784.552	4156.46	30565.3	32273.6	24969	1076.22	2795.72	9783.91	9609.82	3710.9
M154T682			1.78571	0.483616	0.0660284	153.99	681.88	126189	107992	53910.6	29547.9	64144	33197.7	40696.6	40761.6	47111	17758.9	42859.2	11503.8	21494.2	21790.7	21788.9
M118T568			1.78092	0.797642	0.452793	118.085	567.713	91293.4	63559.1	102837	307549	246195	209459	165817	97731.5	138600	97827.9	208395	105935	122114	122098	118430
M329T70			1.78036	0.065442	0.326634	329.149	70.2295	5636.18	4099.27	3376.39	248977	5147.36	2911.16	2541.39	1599.03	2156.11	3509.85	3017.36	4855.24	2000.58	1884.68	1891.28
M329T228			1.77663	1.3399	0.406398	329.232	228.012	68726.2	89947.6	26075	7989.3	25560.3	38470.8	46153.6	49897.8	33669.5	54191.3	48736.3	111397	46027.6	42411.6	42667
M69T64			1.77631	1.72871	0.176415	68.9953	63.9125	29285.6	42537.7	34942.2	18559	29537.8	33517.8	50820	128981	35477.6	40749.2	24320.2	45305.6	19701	21226	21259.5
M558T332			1.77537	1.1081	0.847355	558.331	331.89	230061	261770	343395	170148	1.09075e+06	238604	878822	122422	187492	89198.4	956029	353140	635505	635595	651782
M269T480			1.77362	0.28756	0.218993	269.087	480.487	9729.46	7630.09	15178.1	122660	35029.7	11930.8	9480.9	7212.81	11944.6	3982.73	12599	12912.6	9977.53	9297.38	9294.44
M327T186			1.7734	1.3956	0.38183	327.217	185.877	81115.7	53986.8	37749.4	29760.1	32008.9	6776.16	15007.6	46333	37128.9	66661.5	55151.3	116611	27402.8	27297.4	23519.1
M191T178			1.77166	1.1618	0.719204	191.019	177.943	186033	89840.6	58367.8	11806.5	32980.7	43773	49890.3	76365.4	96917.8	47945.5	160320	59771.2	29396.2	29497.4	30355.2
M678T356			1.77096	1.36798	0.330437	677.549	356.48	73584.8	63696	47500	41632	42494.3	52752.9	97324.7	139353	45668.9	99485.3	34281.9	23910.5	97755.8	98556	98557.8
M524T413			1.77025	0.120949	0.166688	524.297	412.55	145280	71716.2	7192.55	5165.74	7096.88	4122.72	6438.57	4673.48	5252.54	3983.48	4614.71	4134.47	3466.9	3469.92	3613.33
M272T628			1.76616	0.512552	0.0479613	272.018	627.892	77578.4	122016	67661.2	40722.8	62318.1	31006.1	41569.2	41960.9	51279.4	18093	39607.9	13177.9	14348.4	15049.5	14349.1
M264T66			1.76537	0.328513	0.0995662	263.999	66.441	49744.7	22784.9	22274.8	113391	41459.2	6711.41	13955.3	12175.4	29825.1	6045.23	9628.68	12590	2913.67	2613.48	2567.96
M528T392			1.75905	0.56825	0.091252	528.306	392.15	22382.4	34806.1	77190	83728.1	66717.8	66102.3	19677.7	20759.1	54680.6	9300.12	66524.9	28471.6	11927.8	11936.4	12137.4
M210T50			1.7563	1.06592	0.789382	209.989	50.4765	118679	214877	94587.2	44058.6	76708.5	124028	130346	96835.8	104354	178454	105702	101607	78595.3	78597.9	80259.4
M368T72			1.75616	0.0738185	0.333332	368.152	72.311	770.71	858.218	8033.86	237814	1309.78	8271.17	6870.9	1151.54	5613.25	953.695	3091.17	1295.06	4558.38	4579.85	2730.37
M841T217			1.75551	2.52717	0.118235	840.573	216.613	5096.47	1862.02	11775.6	11762.6	7589.56	33563.9	6152.92	20618.7	17228.4	43927.7	21893.1	71251	26506.5	24322.4	24347.6
M411T632			1.75223	1.1061	0.600385	410.986	631.831	149316	77094.1	178911	115637	81937.5	173972	176960	151558	89959.8	87865.7	173659	179295	156380	118849	156013
M843T302_2			1.74956	1.00633	0.993167	842.587	301.683	11553.8	15191.3	37006.3	15515.5	53121.3	306343	32795.9	87186	19701.7	79175.6	43216	179435	54890	55272.5	38482.5
M794T645			1.7463	0.632687	0.0170724	794.141	645.188	129819	127651	133105	75911.1	92579.4	98809	81730.7	87793.1	82012.5	48938.9	87907.4	27846.5	47667	48186	48235.1
M125T700			1.74367	0.696062	0.0225427	125.02	700.285	129234	148166	126001	90750.4	121845	87514.7	81176.6	81842.5	106230	62209.3	106233	51996	73532.8	73494.8	77342.8
M468T387			1.73349	0.505685	0.386072	468.308	387.092	238164	130602	22573.3	12556.7	20369.5	11568	59878.8	80684.8	17859	29714.9	19757.1	12499.7	22548.5	22548.7	23354.7
M548T646			1.73287	0.61492	0.0271213	548.13	645.578	100988	121949	107978	52868.2	79560.4	86032.3	75737.3	65993.8	73957.1	35809.5	66331	19993.8	41372.8	41363.9	41955
M329T206			1.73097	1.29724	0.298472	329.232	205.974	93342.2	61348.3	53724.7	17070.3	52234.6	69548.4	53951.6	119148	50636.3	83842.8	95673.6	47239.5	57426	63963.4	57161.4
M485T65			1.72639	1.04598	0.8527	485.357	64.843	215552	193123	111518	21605.9	105946	100026	128649	134074	121507	118949	107471	171508	95811.7	95266.8	95809.4
M250T333			1.72374	0.496281	0.0470821	250.104	333.288	120356	85742.3	40172.4	118519	81120.9	27771.6	26605.7	31768	75864.4	25958.6	43176.8	31705.9	14654.7	14998.8	14662.6
M284T723			1.72342	0.669455	0.13377	284.009	723.198	289666	366468	180524	104335	145857	179025	103164	122663	202978	110775	152442	155424	53427.6	51455.8	53449.6
M509T662			1.7229	1.28081	0.430322	509.02	662.068	69101.5	88568.2	123900	55686	23123.4	37381	107393	54714.4	132146	53773.1	35413.4	126016	72120	83453.2	71857.7
M385T54			1.72272	0.902388	0.647157	385.273	54.149	790088	738124	448441	167216	489094	450247	403661	369146	698616	344371	466161	500294	324453	324457	326490
M837T263			1.72216	0.865273	0.699637	836.612	263.175	173233	174785	130874	598009	98932.7	308750	105136	333123	245917	155300	284511	160584	92850.1	153177	223130
M176T187			1.72209	0.447387	0.0259011	176.002	186.69	47969.1	91321.4	50343.1	14983.7	56686.4	40189.5	35171.9	26753	23321.3	16847.6	19812.6	12977.7	19440.1	19385.3	20799.2
M184T970			1.72011	1.03652	0.806869	184.073	969.887	241273	206957	193983	78275.7	157214	165138	173232	214118	204365	159206	186923	143082	94130.3	118023	118337
M402T666			1.7183	0.535221	0.0868181	402.036	665.846	128430	170022	58559.5	34208.8	72548.1	66696.5	33424.6	39676.6	74959.4	37879.5	40988	56988	20637	20653.6	23503.8
M765T185			1.71639	1.56192	0.296059	764.521	184.704	5245.02	2273.58	36897.1	76768.1	22419.2	43741.4	23066	55456.6	12453	48904.8	86273.3	66464.1	22468.2	23537.5	22457.3
M873T322			1.71369	1.60679	0.348504	872.563	322.43	15657.8	22781.2	16917.4	8912.76	15105.3	91895	31762.6	38770.4	22973.3	58004.3	23385.4	100298	22956.9	23089.5	22957.1
M829T320			1.71208	1.20486	0.793062	828.537	319.954	14736.3	18975.4	15862.4	8966.46	69349.3	140297	24830.3	23683.1	23678.2	44046.9	21125.4	185763	26549.1	25328.9	25344.2
M315T212			1.70906	0.946805	0.935939	315.195	211.585	24010	23556.7	29149.9	15971	31578.5	265715	74767.7	41278.3	70590.1	53672.3	22290	106638	34775.9	36532.8	34913.8
M145T686_2			1.70771	0.928044	0.789608	145.061	686.403	432547	160613	185216	104235	184779	162254	243448	149326	267504	124417	229361	127108	71414.2	75247.5	75146.7
M783T639			1.70698	1.11879	0.728152	783.025	638.631	27273	39189	34037.8	123974	32537.2	90184	48385.6	54664.6	34387.7	78669.2	66407.6	105925	53408.9	56085.1	40860.1
M569T359			1.7065	0.735287	0.450251	569.342	359.358	313912	172158	53661.5	66061.8	183940	109512	213232	192664	118209	51063.8	45062.9	40971.3	122753	122820	124543
M427T664			1.70142	1.06587	0.839338	427.017	663.605	249338	63993.9	60976.7	283771	409113	238608	241748	217374	285460	262734	341358	43134.6	130902	192870	192024
M284T69			1.69914	0.96742	0.980381	284.348	68.9395	2034.74	1830.69	6494.14	1848.23	4588.66	252100	4464.36	2224.7	2540.3	245480	2810.39	2615.91	207137	8171.49	204226
M307T44			1.69819	0.0800091	0.200139	307.034	44.448	7262.97	8939.87	311.232	159341	49931.4	1744.77	2205.7	1999.11	2345.94	1137.77	5018.63	5497.46	2238.13	2200.47	2238.69
M334T77			1.69634	0.238631	0.337976	334.094	77.39	7043.8	2924.78	2403.61	124485	11424.6	8490.78	8015.68	2292.14	1623.37	8438.53	7745.31	9295.87	4766.1	2454.13	4748.1
M495T285			1.69309	1.41761	0.102364	495.116	285.468	6255.23	51604.3	43106.2	21524.9	39660.5	53409.6	47842.1	43774.3	67072.1	45251.2	46926	54716.1	41445.1	41429.1	38645.8
M149T274			1.69262	0.215054	0.143974	149.045	273.707	151884	24047.6	22049.5	27374.4	18553.2	19130.2	9367.31	9136.83	15831.3	6310.61	11028.2	4893.28	7643.67	7332.03	7646.25
M604T304_1			1.68288	0.433589	0.0196371	604.314	303.998	68778	64894.2	54721	21093.9	35630.1	30664.3	21667.7	13779	28976.2	11324.8	38070.3	5757.7	21967.5	20551.1	21183.5
M414T432			1.68281	0.187078	0.305642	414.126	431.821	20811.8	272704	13990	13707	9677.68	14088.1	3586.62	21744.7	27252.2	4548.93	3299.47	4105.83	419.203	452.977	420.001
M855T695			1.6815	1.15584	0.672101	854.999	694.736	20856.7	146746	65372.6	146580	37296.3	116066	37794.3	40015.6	131577	146234	94120.9	166229	94560.4	82249.3	94615
M891T720			1.67889	1.54745	0.0815567	890.941	720.38	15656	57684.3	28569.8	27164.2	65025.4	18774	58542.2	63189.7	29539.7	58853.4	53422	65865.4	73082.8	76571.3	73027.5
M728T682			1.67734	0.479219	0.0322959	728.011	682.18	54481.2	162125	103935	58779.9	95729.4	67107.7	58171.3	71227.4	60963.1	27287.7	18135.4	24027.4	12845.2	14897.7	13075.1
M227T682			1.67561	0.653002	0.317831	227.065	682.115	178393	295577	85561.1	43014.5	73207	68369.3	58735.3	105075	128487	66800.1	64843.8	61972	21047.1	22698.6	22644.2
M367T682			1.67554	0.287402	0.0952883	366.995	681.592	103368	106859	31171	12331	23652.3	10733.5	18646	15001.6	22536.2	8007.99	16747.3	1865.6	7337.04	6435.02	7327.81
M875T322			1.67369	1.44862	0.462535	874.577	321.579	17929.1	23644.4	11440.7	9403.73	38867.8	131349	30005.2	85597.9	21246.4	90150.4	35238.8	74759.9	21690.7	23376.9	23345.5
M249T531			1.67361	0.768608	0.229581	249.022	531.488	263920	279093	214698	90155.4	197931	167045	184118	128721	249011	123958	162163	84228.2	71434.7	71684.9	74178.8
M790T78_1			1.67175	2.03883	0.0652572	789.557	77.987	22003.7	17592.9	20859.2	31970.1	18535.6	13210.8	74761.6	17207.5	32952.3	67996	17701	42548.3	62565.2	62251.6	17271
M452T42			1.67145	0.485575	0.351192	452.246	42.302	283981	32916	66561.7	20500.4	22174.9	52582.8	57644.7	45221	45184.2	43073.8	27555.4	13773.8	22998.6	20810.1	22995.2
M236T694			1.67122	0.579941	0.11916	236.071	693.963	175572	73781.8	194108	214810	196026	67335.8	37648	200597	103702	115159	53993.6	23393.6	49920.2	67206.2	49345.7
M228T95			1.66706	1.92115	0.40962	228.051	94.826	4682.95	91515	64685.4	15885.2	45879.7	46225.7	41055.1	35675.2	106777	19582	306051	7407.51	21268.7	22619.3	22645.4
M466T306			1.66525	0.0476376	0.212275	466.328	306.399	68002.1	239040	4758.44	2361.82	5787.89	3162.73	1715.98	4388.47	2158.97	1618.44	4198.45	1312.02	2044.37	2082.27	2044.38
M136T161			1.66497	0.421053	0.0783252	136.038	161.17	131697	72166.9	30843.8	91600.6	48153.8	19538.3	19684.3	19168.8	72617.6	9128.29	21128.7	24167.3	7231.38	6721.2	6715.9
M519T877			1.66381	0.656682	0.249782	519.051	877.285	152170	172746	141558	9260.76	94615.5	63668.5	71555.5	33806.8	135966	34063	83947.5	57010.3	21882.6	22789.3	22796.1
M859T313			1.66133	0.752033	0.660791	858.583	312.736	21932.8	24162.8	31770.7	20117	189250	305038	25727.6	93447.1	49334.4	62475.7	38748.4	175674	38711	41105.7	38786.1
M291T435			1.66104	0.852504	0.345351	291.069	434.95	324593	508590	399390	274018	314445	289974	305300	376595	385608	249444	343461	139235	216284	216176	225931
M203T1078			1.65876	0.469683	0.0517397	203.15	1078.26	125578	71096	50234.3	30202.8	59954	43171.1	23706.7	16267.5	52220.7	15828.7	48519.9	22047.1	16153.2	16156	16731.1
M195T790			1.65836	0.67223	0.0330558	194.927	790.215	125626	165141	129536	153942	149149	78579.8	110575	85161.6	138703	60764.6	85165.7	58741.5	59959.3	61452.2	61380.1
M278T74_2			1.65687	1.6632	0.0125057	278.344	73.957	18807.1	22759.4	23882.9	9367.24	19631.6	20212.1	25827.1	36102	27755.4	46289.4	21461.9	33267	28702.2	28712.5	30337.2
M520T375			1.6556	0.926595	0.872062	520.338	374.644	322990	135917	56824.9	17425.9	59935.6	49250.4	117574	128575	69124.4	106578	56535.7	116805	80442.6	79212.9	78708.5
M813T79_1			1.65457	1.08655	0.716127	812.606	79.166	107970	93843.8	85896.8	67374.5	106407	223538	92315.1	121554	130678	117696	97498.4	184577	90749.3	89974.2	90766.6
M527T366			1.65385	0.5363	0.356457	527.379	366.452	235594	126760	29277.2	30871.6	36190.5	18768.4	70666.9	99995.7	24128.5	42869.4	9083.51	9319.03	66111.3	68380.9	68399.9
M313T80			1.65013	1.29104	0.195615	313.238	79.536	45610.6	50931.3	32985.3	9076.69	33992.4	33184.9	36974.1	41591.2	36729.2	53678	36705.3	59994.6	35829.4	37378.1	37435.6
M559T474			1.65003	0.753845	0.462024	559.15	473.873	124450	306517	357441	59336.6	304057	116099	288063	113021	124591	54179.4	305034	70912.1	100002	124380	124195
M280T45			1.64968	0.533928	0.203964	279.995	45.0815	112428	62660.3	50578.6	155859	80238.4	17488.2	15048	24921.4	133616	11088.6	26088.8	45123.7	9615.1	9611.5	9766.9
M261T870			1.6483	0.601821	0.0207815	261.036	869.698	94980.2	113254	77270.4	55313.6	74060.2	66259.4	59457.1	69125	57456.7	33876.5	53333.1	16310.8	43428	44089.5	44086
M454T359			1.64516	0.269631	0.144474	454.345	359.465	200496	141070	27268.5	14870.6	21879.7	21339.3	9991.14	17400.4	10406.2	15153.2	20069.8	42091.4	20186.8	20196.7	19778.9
M228T264			1.64262	1.73457	0.0993571	228.028	264.18	936.153	13047.4	18007	36613	22244.9	23363.4	34870.1	24432.3	22485.7	50354.8	15856.2	50109	9244.86	10276.7	9989.45
M669T870			1.64239	0.467787	0.0296925	669.139	869.698	76803.9	111642	46736.1	37686.5	51310.7	42966.9	44843	36033.9	35461	20388.5	29702.6	5317.17	24783.4	25274.6	25283.1
M596T48			1.64067	0.115189	0.0238921	596.487	47.99	43175.3	41455.4	98064	46633.9	10723.6	4793.7	6274.66	4681.51	4753.78	5371.87	2818.43	4303.19	3718.12	3600.19	3573.82
M675T645			1.63959	0.636415	0.0573417	675.045	644.91	103206	141211	94135.6	49407.4	96615.8	66283.8	71774.8	64562.2	80731.8	39313.3	67919.6	26273	39635.7	40374.4	40546.9
M375T681			1.63928	1.20182	0.271403	374.962	681.023	101946	123132	127454	158998	159655	161780	231211	77501.6	163972	189548	197825	141020	244067	276456	276378
M303T388			1.63835	0.540153	0.198985	303.049	387.645	68547.2	236483	79036.1	41113.5	56986.7	63196.9	50329	74471.5	61558.1	38548.1	43465.5	26207.5	33719.6	32767.8	33720.9
M357T839			1.63833	0.598208	0.116482	356.997	839.353	110083	128091	90644.8	16474.8	73238.4	48441.2	49412.6	35182.5	74390.3	29748.2	58678.4	31934.9	22530	22845.4	22841
M137T470			1.63664	0.73801	0.062612	137.045	469.545	230820	150608	204079	115475	163089	147596	140983	139215	142626	83929.2	152241	87626.5	77378.6	80522.6	77362
M409T78			1.63445	0.395185	0.0447551	409.271	78.2835	32630.1	45789.7	113587	29948.3	73218.2	30872.9	24732	17457.6	32069.4	11078.2	35121.2	8390.55	32573.1	32946.3	32946.4
M925T710			1.63093	1.00249	0.991467	925.021	710.461	185635	601169	265613	392025	220989	310270	230539	424897	447549	327624	191821	358184	174359	177668	174356
M648T664			1.63089	0.594567	0.130472	648.045	664.242	124679	174172	60607.8	35749.3	65065.4	65959.5	54090.4	59158.1	69745.8	36962.9	51686.9	41236.6	19876.5	22050.5	21933.6
M279T334			1.62914	0.84911	0.571597	279.038	333.715	372873	294491	338493	129708	382213	164058	250884	153502	475651	120393	312230	115403	197081	176563	184279
M763T300			1.62852	2.55234	0.409154	762.543	300.021	23734.8	26715.3	13729	10857.9	13154.3	12145.5	12409.5	14147.6	18425.2	6492.53	12100.8	192518	9067.42	11548.4	11581.4
M138T249			1.6284	0.643542	0.228487	137.986	249.09	159751	144256	182182	42410.7	250219	71624.5	154052	47249.7	151482	34518.5	130195	29798.3	45302.9	41785.7	45105.9
M1060T688			1.62832	1.28158	0.409879	1060.01	688.159	31800.8	16648.9	79074.2	57830.8	77970.3	39358.5	66717.1	43284.8	28552.6	92425.4	46677.1	110255	56941.3	57010.4	45618.1
M757T645			1.62792	0.665574	0.0657948	757.048	644.995	120200	157830	133574	63734.8	110085	80038	89723.2	78827.7	108050	50030.8	82509	33773.3	48595.1	50167.9	50158.2
M784T145			1.62539	1.02998	0.942308	783.571	144.924	31725.7	28186.4	332114	127140	74772.3	323946	178663	108864	217801	134410	85112.3	220551	54957.6	97846.5	82790.7
M479T49			1.61962	0.102625	0.0121435	479.444	49.0415	26998.9	43026.2	57023.6	71820.3	16750.1	1911.6	4047.04	3540.08	2172.86	5630.62	1468.54	5465.01	660.989	744.585	653.918
M449T49_3			1.61577	0.0615054	0.0045811	449.398	48.909	33383.7	45085.4	58147	38912.2	14587	2811.08	4402.48	959.175	642.779	2121.98	1596.67	2142.94	923.152	763.309	760.042
M483T675			1.61444	2.1741	0.121592	483.132	675.27	19392.3	6968.46	10279.6	26842.1	16712.1	7184.35	52550.3	27204.4	9207.43	10199.1	23529.4	67280	8725.47	9136.09	9428.7
M205T50			1.61337	0.591794	0.105843	205.085	49.957	215517	175263	60734.4	111486	128803	57446.1	130831	45375.5	87157.1	71490.7	59428.6	49117.9	46240	46237.5	45333.6
M154T295			1.61328	0.177719	0.0288621	154.096	295.435	67945	17414.8	12611	84575.2	42748.4	11679	4590.88	6161.66	9734.91	6026.07	10398.3	5202.76	4437.7	3617.4	4672.95
M280T777			1.61296	0.772114	0.522207	280.092	776.823	755592	3.12388e+06	747771	842244	843509	767339	709779	852923	839958	1.34976e+06	590374	1.12404e+06	478832	479065	496511
M524T317			1.61079	0.510633	0.167727	524.277	316.883	144768	108870	43517.2	14680.4	41596.9	31390.7	35536.5	21897.8	47099.4	28332.9	36842	26794.9	23144.9	23428.9	23143.6
M764T287			1.60694	1.61206	0.132277	763.593	287.267	15180.9	15113.6	54263.1	48598.3	36982.4	47985.8	52864.2	65738.8	73010.3	30879.8	26535.3	102600	52259.6	52429.3	48186.1
M218T561			1.60667	1.01866	0.916588	218.138	560.68	327778	211428	218514	119888	152413	176768	149603	271663	222757	190926	162084	232274	158092	156414	156453
M327T472			1.6064	0.819197	0.705991	327.141	472.387	304278	13271	337820	118663	276226	5080.26	290813	3777.25	196783	3409.99	291013	78734.5	197990	191716	198028
M258T1035			1.60567	0.444225	0.225371	258.109	1034.85	56563.7	338129	202468	34856.3	49926	32288.5	59552.3	62356.5	49266.1	58675.7	48428.7	38999.7	34902.4	32572.3	34987.6
M763T82			1.60369	1.28595	0.721595	762.59	81.6125	63608.8	67805.4	19535.4	9160.34	18000.8	153636	56337.8	9017.92	26649.7	252891	50707.7	31003.5	70533	70279.4	70278.3
M639T700			1.60366	0.681572	0.042935	639.02	700.101	109741	142769	109790	76941.4	80365	99970.2	94256.4	77341.4	91434.3	37824.6	81404.1	40024.8	65867.1	67286.9	65863.3
M242T811			1.60312	1.21338	0.350116	242.078	810.793	106274	104277	196120	105217	203881	224867	254969	207571	190454	208321	206020	74015.1	248812	252848	252749
M333T80			1.60141	0.80528	0.579566	333.206	79.895	211697	155334	139965	28563.6	124142	428798	116497	89421.9	278315	114297	125876	152141	73416.4	73449	78348.5
M111T446			1.60121	0.56476	0.149066	111.02	446.048	66215	163640	72481.1	29586.4	52308.6	77400.1	39137.4	24109	87291.9	33647.5	58273.5	18251.4	36103.3	44397.4	36870.7
M367T547			1.59947	1.51022	0.407426	367.104	547.381	10192.2	8235.97	10523.8	75752.5	21362.4	26813.7	41261.8	29812.3	27864.1	34149.5	9861.2	87933.7	12680	13288.4	13282.7
M674T381			1.59932	0.500144	0.0309553	673.527	380.985	45136.5	64396.6	49964.2	47846.7	53316.6	45709.9	5883.73	5954.81	61654.9	3956.99	38523.5	37255.5	3180.19	3357.88	3355.75
M279T830			1.5993	1.23758	0.0732452	278.949	829.72	32900.9	46641.2	40434.4	20419.4	43073.7	37564.5	46639.9	47198.8	52048	46692.7	35925.5	45042.5	36266.6	37510.2	37506.4
M1172T690_1			1.59916	2.11043	0.0621425	1171.53	690.355	11204.6	31786	19245.9	18008.4	34355.9	26156.9	33400.6	89853.5	68450.9	63752.9	28831.6	12769.6	35593	35588.6	28987.9
M855T295			1.59583	1.37271	0.0628274	854.565	295.255	62202.8	59543.1	44854.7	26685.5	57642.1	51930.5	89533	60265.8	89290.6	49585	53344	73719.4	31556.5	31534.7	30351.8
M173T62			1.59316	0.336493	0.114582	172.991	62.054	31906.8	23120.3	12148.9	91828.5	40035.5	6426.72	6343.74	7426.03	30337.1	5192.76	10044.6	9793.8	3140.4	3141.67	3199.06
M354T59			1.59018	1.80457	0.0486183	354.282	59.464	31127.1	28443	56284.6	40612.1	36606.9	5086.2	56199.9	103789	40014.7	48519.7	66058.6	43010.6	42482.4	42398.5	34341
M242T74			1.58666	0.326997	0.0685294	242.048	73.795	56392.7	18780.5	15827.4	81249.1	37467.9	9247	9073.83	10511.8	30519.6	3366.43	6286.86	11842.1	3107.37	3420.98	3422.64
M263T733			1.58198	1.48546	0.0744769	263.076	733.028	31249.9	20900.5	56191.9	39523.2	63768.5	71919.4	94097.7	69626.8	54627.7	88605	73200.5	41050.2	103476	103488	106516
M855T78			1.58114	1.31606	0.247096	854.567	77.5805	80301.7	84894.9	64478.1	32208.6	75301.2	54815.9	65680.6	73056.9	113347	59132.7	57809.3	146870	36461	37421.4	37417.3
M335T73_1			1.57953	0.774998	0.713487	335.161	73.017	171041	120021	163632	3779.2	3671.93	4136.83	2302.58	58200.3	195712	884.82	100392	3875.47	18688.2	42052.2	41865.9
M333T69_14			1.5795	0.125637	0.311137	333.171	69.091	186437	24162.4	3319.48	1672.8	3104.39	2125.32	1140.15	1831.76	9653.26	6749.92	2914.86	5453.45	5379.91	5376.08	5549.63
M332T68			1.57868	0.639148	0.137222	332.265	68.378	195877	120600	108956	47275.7	84362.9	61706.9	65330.8	44393.3	94107.1	55525.7	82392	53741.9	52967.2	52997.4	55054.1
M311T80_2			1.57776	1.39765	0.154353	311.221	79.644	35649.9	41148.4	23483.6	11161	20813.6	33803	29882.9	36977.4	27020.5	59133.9	27830.8	51248.3	33434.6	33455.2	35102.8
M743T225			1.57571	2.56018	0.0229368	742.538	224.96	3803.51	1983.69	13648.9	6447.28	9940.25	16225	7205.2	21697	13117.5	32667.1	22630.1	35937.1	12294	11943.3	14795
M857T317			1.57178	0.820436	0.690228	856.569	317.472	39560.3	56126.5	68341.3	38080.9	342088	382680	105397	135708	97130.8	164453	89227.5	168527	74044.2	75443	75436
M231T455			1.56843	0.210232	0.158264	230.997	454.756	27430.5	13089.6	4007.02	91654.2	20077.5	2748.29	2443.21	5775.81	14197.8	1321.46	2496.78	7193.35	932.767	884.405	932.445
M650T689			1.56638	1.70446	0.109063	650.493	689.34	11861.6	19232.6	6257.31	34169.4	45302.4	24383.3	42079.4	30415.6	46548.9	53015.3	9303.61	59318.1	21341.1	26052	21426.8
M523T386_1			1.56603	0.510476	0.148278	522.699	385.616	29140	27807.3	69484.3	22866.3	119383	94830.1	19579.1	12143.8	53248.4	13122.2	65322.3	22148	12550.2	12628.9	13163
M723T179			1.56396	1.99178	0.179569	722.511	179.406	4926.13	2800.92	14492.1	47174.9	17531.6	18040.3	7474.22	76237.6	11828	31944	41469.9	40115.4	17328.8	17087	17082.7
M731T47_1			1.56072	0.0883638	0.0160125	730.596	46.997	19626.5	46544.6	48777	69304.2	10350.8	4428.17	6617.85	1560.68	1626.97	2058.77	2277.55	3445.35	1868.24	1770.83	1866.21
M136T139			1.56031	0.443024	0.0121817	136.007	138.515	51478.3	57837.5	28230.8	70798.7	69703.8	22259.9	31268.3	17669.7	29638.6	22348.6	7710.58	24408.4	17710.9	20978.8	20930.1
M255T179			1.55998	0.562489	0.535802	255.163	179.361	1721.07	575.357	1352.37	111325	400.455	69628.8	34169.1	590.699	1134.67	26172.4	41059.8	935.502	50111.7	42156.1	42098
M466T645			1.55914	0.642666	0.0370231	466.127	645.401	106385	114779	115064	65633	84906.8	72361.6	79517.6	64200.5	75815.5	37111.4	83362	19326.6	47121.5	45866.9	47091.1
M122T39			1.55833	6.88009	0.0694347	122.059	38.7705	6784.91	3591.54	2081.59	12949.6	6672.29	1625.31	1046.48	72807.5	5049.12	73482.3	77859.9	1649.88	79275	79402.9	79871.2
M297T42			1.55734	0.465926	0.239548	297.152	42.377	224836	74449.7	33985.8	36252.3	33099	35039.4	30226.6	31208.1	43032.9	36078.9	27774.1	35597.4	20315.2	20666.8	20660.1
M407T611			1.55577	0.242917	0.0798773	407.238	610.714	108485	65667.3	33901.1	12284.7	19204.6	8484.75	14419.3	8317.56	8385.58	9777.41	18061.6	1288.72	21136.5	21199.4	21426.3
M158T552			1.55447	0.45627	0.0350132	158.118	551.986	74788.2	68668	53015.4	22976.3	29918.5	21206.3	22293.1	24096.7	22905.2	22381.6	25324.2	6453.58	23150.5	23192.4	23986.6
M144T356_2			1.55286	0.46479	0.0134354	144.045	356.259	67390.5	39753.8	40213	34354.1	38338.9	28823.9	21172.8	11592.3	34842.1	11109.1	32218.1	4739.86	16480.9	16535.4	17098.1
M263T631			1.55258	1.09569	0.68226	263.012	630.89	39136.7	143243	91600.6	57616	72059.1	38119.8	74245.3	68482.6	83733.3	76260.4	97116	84213	68860.4	77162.4	71208.4
M194T180			1.55179	0.614654	0.277332	194.012	179.786	146955	192938	51449.4	32416	55745.8	44666.2	89327.7	48243.1	87030.3	41254.9	22735.9	33591.3	17518.6	17502.9	18681.5
M838T265			1.55115	0.916357	0.863171	837.617	264.589	136052	260220	891583	1.1065e+06	118868	156712	173082	889967	553531	365116	253581	211336	197712	198413	184796
M332T298			1.55009	0.341241	0.372065	332.331	298.262	8185.34	7028.44	20870.8	44185.8	302549	23842.7	24495.9	11410.6	17785.3	315.35	44288.8	40474.1	7606.53	6886.4	7603.7
M490T55			1.54785	0.67022	0.0142329	490.461	54.795	80784.3	129651	120377	107363	107587	81139.6	67198.2	76158.7	96392	69412.5	76540.4	34460.4	76774.1	77611.3	77134
M186T414			1.54733	0.463829	0.276761	186.045	414.457	32525.9	3076.84	22735.5	114029	25971.6	14031.2	15165.4	11975.3	27337.3	8332.02	20426.3	15266.9	7635.53	7931.23	8117.24
M705T377			1.54679	0.698006	0.31491	704.577	377.388	135318	206759	156110	149103	125718	152240	18538.7	15988.5	185440	31333.1	127003	267525	19215.5	19245.7	21081.1
M184T1003			1.54481	3.25234	0.110701	184.073	1003.43	26245.3	23923.3	16787	11687.9	17442.2	22614	13987.8	25503.9	46969.2	121819	161173	16598.2	30521.8	31167.7	46210
M290T71_1			1.54421	1.0772	0.795005	290.033	70.654	24214.8	121626	109800	7167.02	59536	105771	90575.8	96053	65522.9	82445.5	66893.9	59673.2	48353.9	48980.8	48356.8
M318T76			1.5424	0.469296	0.461226	318.3	76.383	11318.8	8391.08	27388.2	246819	30606.8	10340	29344.9	17897	22416.6	17281.7	23500.6	46709.4	7259.17	7258.72	7178.26
M230T692			1.54175	1.65871	0.0225051	230.039	692.249	24436.4	9384.74	31018.1	14345.4	18277.5	16638.8	27306	28713.5	24089	27738.3	47414.5	33999.8	15907.1	15912.8	16709.4
M1178T639			1.54145	2.26284	0.0322977	1178.04	639.417	7829.41	6461.59	12380.3	14975.5	13419.5	13787.5	26146.9	22664.8	37473.2	14942.4	8691.08	45886.8	9231.04	10317.4	10330.4
M244T47_1			1.54056	0.197438	0.0162729	244.028	46.983	47118.1	19274.8	12670.3	53964.1	28831.7	7278.79	2183.88	3362.88	4979.99	3092.28	8243.8	11531.4	3903.99	3798.37	3798.6
M453T345			1.53886	1.45747	0.193974	453.342	345.005	49384.2	81165.4	85277.5	83205.1	42040.4	88168	154780	87272.4	35520.9	51433.6	160179	136420	73594	73353	67784.8
M721T700			1.53885	0.65866	0.00342226	721.023	699.995	87973.8	111061	111410	70231.1	81590.7	78739.8	64137.9	62214	69490.1	45801.7	65615.5	49080.4	66166.5	65193.7	65195.1
M767T78			1.53783	0.960979	0.88997	766.572	78.451	108857	112987	108510	85816.8	129161	308127	107201	134458	138686	109431	99361.1	231019	68738.5	69061.6	69582.8
M652T394			1.53691	1.36052	0.219033	651.533	393.898	57893.8	55520.1	23972.7	33314.4	21998	17973.1	52384.4	44926.8	22261.5	59699.1	39990.2	67361.6	13846.1	14040	13845.3
M281T788			1.53457	1.15412	0.304083	281.095	787.837	43340.8	73932.2	47446.6	53891.1	70113.1	77034.7	79016.3	65161.3	70859.7	77365.4	42601.9	87126	41922.7	48912.9	48419.5
M774T785			1.53224	0.774136	0.16408	774.232	784.719	178365	296327	197950	156103	199696	176180	198029	192417	203126	126455	150873	61640.8	116930	117631	117624
M800T307			1.53165	1.5721	0.644278	799.565	306.838	5583.68	14310	6383.81	7620.24	8620.59	85933.2	7448.15	10512.8	9342.7	21498.6	8850.58	144286	7267.82	7623.09	7290.33
M433T49_1			1.53151	1.21426	0.624755	433.284	49.462	159416	85234.3	54200.4	7166.07	66290.6	51271.6	19351.9	83285.8	94088.2	108513	39519.3	169576	41332.8	42640.3	40532
M438T329			1.53047	0.357659	0.0400821	438.287	328.682	37858.4	71660.4	25978.7	20653.3	26248.5	14853.2	16661.5	11730.2	18945.2	2351.37	18896.8	1964.11	13538.3	13864.8	13545.2
M506T385			1.53017	0.729035	0.482546	506.359	385.033	27120	24681.2	95689	65714	93510.6	145736	27994.6	18379.9	148187	12426.8	71811.3	51052.8	16944	17150.2	18160.2
M364T66			1.52868	1.44693	0.216093	364.251	65.5005	47619.2	56525	17186	4507.52	28893.5	25135.8	39690.2	31156.2	25047.2	56875.9	40717.1	66768.3	27187.9	27523.6	27187.9
M622T689			1.52837	1.44808	0.130858	621.974	689.159	24241.7	69723.9	76944.2	76280.6	36131.6	73355	78996.6	60573.4	50656.3	90169.7	142251	93848.6	111616	122961	122717
M610T70_1			1.52708	0.589482	0.00453143	609.523	70.494	65158.1	63857.1	66584.3	88914.9	66537.9	61378.8	42028.6	57941	45923	34937.3	50548.5	11742.2	74620.2	79674.5	74555.8
M600T48			1.52644	1.19103	0.223831	599.503	47.99	53868	76830	37980.5	39349.3	51309.6	51527.1	48495	65323.1	54304.5	82111	52729	67286.7	59274.8	60744.2	59268.2
M705T314			1.52536	1.6991	0.0583059	704.521	313.778	44716.3	34950.2	24996.7	30627.4	39588.7	21387.7	43967.4	43145.6	86430.5	36612.8	35476.2	87845.5	29327	26911	26904.3
M755T81			1.52309	1.5913	0.134694	754.536	81.375	42332.9	40654.1	26723.3	82215.6	40774.3	32278.2	39690.2	122986	88764.3	44601.3	40709.2	84909	30536.4	30911.1	30885.5
M277T64			1.52135	0.0628014	0.188288	277.017	63.984	22804	4449.2	566.634	83064.3	5737.63	1742.49	2460.05	1193.18	545.637	814.796	1493.58	926.194	1757.1	1757.95	1876.39
M733T47			1.51606	0.100602	0.0199191	732.611	47.376	18432.5	49669.9	47323.6	68883.5	9396.84	3637.93	8169.3	2621.82	1645.66	2367.35	2476.18	2572.91	1886.52	1884.19	2152.39
M593T645			1.51532	0.631594	0.0598602	593.041	644.888	91655.9	111487	83098.8	41880.1	79897.1	53734.7	69269	50685.1	65896.1	29547	58366.9	17876.8	35190.7	36002.4	36359.5
M104T602			1.51461	0.469006	0.32258	104.106	602.224	171901	2004.57	80866	39751.8	29468.5	391427	71570.6	41371.2	59313.5	21704	106364	35212.1	42968.9	42820.6	34384.3
M168T220			1.50911	0.273256	0.264189	168.112	219.87	16234.2	26252.9	18181.6	174591	20494	3346.7	10834.2	8533.55	12721.8	8131.08	20610.1	9970.07	5279.83	7215.45	7236.48
M269T79			1.5067	1.25866	0.100332	269.211	79.3035	32736	39037.1	44300.1	16218.4	32910.1	36446.8	36335	36173.6	47977.9	52914.1	38040	42365.8	34323.9	34326.9	34603.4
M992T393			1.50604	0.417747	0.130089	991.671	392.949	93142.3	1101.37	74818.3	11003.5	74823	39843.3	24879.4	14.0159	41349.7	26.8513	44224.4	12628.9	25034.9	24187.4	25022.9
M325T37			1.50405	1.82031	0.385729	325.237	36.836	7687.08	153041	1841.76	2776.59	1819.74	121766	204833	62341.9	139846	114843	2605.78	1477.91	64912.4	112437	112020
M97T1297			1.50277	1.54105	0.0740399	96.9599	1296.53	21489.2	23673.4	20485.7	26983.9	22489.2	22136.5	25386.7	36412.1	25742.9	64532.1	26431.1	33015.7	29391.6	28068.4	28102
M338T947			1.50266	0.498484	0.0868693	338.076	947.305	76019.8	88298.2	44154.9	17451.7	34919	28978.7	25104.9	20324.3	45734.7	12119.6	33727	7461.3	15645.4	15703.7	16655.3
M151T469			1.50203	0.363763	0.121309	151.026	469.404	24779.9	117234	104655	22318.1	15129.5	21689	20102.8	14056.9	17643.4	18254	15520	25663.4	8202.22	8806.45	8802.68
M317T638_2			1.49885	1.21341	0.413454	317.114	638.116	39836.1	31153.9	60230.6	33007.2	39841.5	76424	37772.6	44894.9	45917.1	75312.9	42882.2	93573.8	60447.8	31884.6	60922.6
M582T309_2			1.49736	0.165012	0.121935	582.376	308.901	90378.1	48311.1	10833.7	6538.86	7419.65	7278.99	5057.08	4600.05	6640.67	2038.43	7271.99	2569.22	4685.91	4683.01	4792.27
M477T48			1.49731	0.132933	0.010667	477.392	48.092	21673.1	52490	50336.9	50857.1	13553.2	3827.16	8281.7	4515.5	3406.42	3636.34	3267.16	2514.08	1130.26	1070.87	1132.39
M599T426			1.49667	0.106264	0.156135	599.317	426.492	93887.3	61305.1	3192.7	2594.77	3381.04	3105.69	3337.12	2975.97	2717.18	2888.98	2759.87	3116.48	2411.2	2540.75	2411.38
M394T54			1.4945	7.31457	0.0557244	394.351	53.614	7319.44	4656.15	6050.61	7625.08	4130.54	2680.99	76384.7	2746.67	5029.83	5327.53	76562.9	71400	1825.57	1826.5	1606.11
M321T77_2			1.49392	2.23924	0.428993	321.165	77.0795	1329.34	3521.57	134531	647.75	2483.61	2066.21	1362.46	1040.03	167857	111820	2818.56	38850.2	74107.3	74738.5	76040.5
M498T405			1.49214	0.190877	0.115095	498.254	404.849	60406.5	97414.8	1694.59	926.742	81892.1	3617.72	1024.93	737.253	1959.21	551.288	40732.6	1941.41	1403.34	1338.22	1403.31
M648T610			1.49014	0.294776	0.0734037	648.309	610.146	102860	56727.6	33970	19937.8	22429	8712.2	19410.1	9469.22	9686.88	12524.3	19897	1125.6	35289.7	36445.2	35343.2
M122T1347			1.48964	1.21321	0.549115	122.096	1346.52	57027	29295.1	49617.3	48116.8	114728	69029.6	36265.9	49123	77591	60965.8	65974	156317	52534.1	49313.4	52612.8
M326T294			1.48963	0.297349	0.000186573	326.125	293.675	31052.4	22343.3	30636.6	28729.7	21485	20007.4	8607.1	6945.37	15676.5	734.663	12355.6	1548.14	9775.39	9285.84	9294.34
M809T639			1.48707	1.71191	0.119106	809.021	638.849	16164	22961.1	23494.6	20062.4	22422	16765	21755.9	63945.8	20284.6	58363.5	21273.2	23006.3	15055.1	18666	18519.1
M487T299			1.48546	1.43053	0.196423	487.304	298.652	49527	16393.3	21263.9	20232.6	54106.6	52910.9	19621.2	49982.7	83527.4	52355.5	47903.3	53364	28700.6	33175.9	30676.5
M122T1375			1.48403	1.93055	0.134473	122.096	1375.09	55065.6	28076.3	124145	28044.9	44930.2	26646.8	72339.8	22926	165428	136589	153525	41694.3	31556.3	37238.9	31829
M318T78			1.48305	1.24728	0.162136	318.213	77.951	33921.8	35236.8	54415.5	14582.5	40764.9	47605.3	47992.1	45852.5	57166.2	49724.3	37843.4	43963.5	30843.7	31273.7	31759.9
M361T778			1.4829	1.26756	0.205622	361.209	778.348	35355.3	87068.5	39339.6	48740	39508.3	39703	43740.8	64942.1	54772.5	61526.6	59444.7	82803.8	63460.6	61137.2	61208.7
M403T54			1.48214	0.342884	0.0408603	403.283	54.224	25209.2	27856.2	64711.3	74174.8	20679	14078.3	15852	10599.3	18330.8	7529.57	20615.8	4807.34	9975.24	10008.5	10389.3
M1019T383			1.48068	0.337129	0.0318702	1018.69	383.396	74664	46630.8	43057.9	2925.38	45646.1	22291.6	13716.6	18787.6	18908.7	776.288	19552.2	7556.77	15719.4	13502.6	15763.8
M105T685			1.4806	1.06459	0.78044	104.991	685.288	1.11584e+06	419275	1.26437e+06	1.38452e+06	665700	639723	1.20607e+06	1.4014e+06	699560	715509	1.16013e+06	661340	1.12387e+06	1.12174e+06	1.12387e+06
M429T645			1.47932	0.583684	0.0203045	429.035	644.995	68283	73808.9	63078.1	33745.5	60291.9	42970.6	46960.2	31916.1	44170.1	20923.4	43911.8	11842.3	26715.8	27072.7	26710.5
M792T109			1.47909	0.800524	0.539768	791.576	109.075	46244.1	76587.3	203922	281931	161523	116521	139312	108563	249710	89518.2	92025.5	30718.3	130301	129877	130301
M297T76_1			1.47878	1.60393	0.481334	297.167	76.133	2288.98	123982	112527	478.951	1742.07	2414.83	56628.3	1402.05	84854.1	127268	119592	706.17	80260.4	75282.7	69791.5
M154T55			1.47681	0.685824	0.211981	153.981	54.885	93383.5	247566	169029	55059.4	97827.3	93727.6	101242	91093.2	88058.1	96525.8	94432.6	47538.2	86332.9	92834.3	92350.2
M189T443			1.47444	1.3152	0.221908	189.04	442.87	26184.9	58171.4	22359.2	24355.5	26240.5	24346.7	40740.6	30614.5	51012	33606.3	27133	55810.2	21314.3	21508.2	21798
M334T810_10			1.47352	0.85508	0.857395	334.149	809.803	2001.92	854514	2047.38	327428	1589.37	1431.45	1484.64	1437.49	385303	215210	301685	111581	220248	221829	224678
M807T79_1			1.47263	0.9415	0.574123	806.568	79.034	1.249e+06	1.62572e+06	1.60363e+06	1.54599e+06	1.55928e+06	1.11557e+06	1.1454e+06	1.8665e+06	1.55214e+06	1.22604e+06	1.23943e+06	1.16076e+06	1.15446e+06	1.15445e+06	1.16206e+06
M1009T660			1.47253	1.39335	0.0724111	1008.97	659.647	43968.7	29549.5	23734.2	18236	29157.3	44575.2	36369.2	51800.5	50183.9	56233.1	41114.9	27948.3	47993.3	49620.1	57598.1
M1004T373			1.47243	0.238342	0.113099	1003.71	372.824	121100	16051.8	31960.7	16479.3	31487.1	15846.4	8366.11	7923.28	17338.2	2093.13	18861.3	933.696	22041.4	21634.3	21643.8
M280T744			1.47123	0.70238	0.0749498	280.091	744.29	121466	131662	76154.8	72171.3	83102.8	81156.6	62601.3	85906.7	86530.2	51256.1	82584.8	28466.6	38800.6	39076	39076.4
M703T304			1.47039	0.198906	0.185654	702.541	304.442	80931	167631	7479.73	11743.9	8120.79	8974.64	10325	9825.07	11105.3	6062.6	7987.87	11358.8	8472.6	7739.72	8574.15
M876T645			1.47006	0.66027	0.0358464	876.143	644.983	104608	121014	107249	65554.2	68306.7	85623.3	67118.3	78923.3	78659.4	46709.2	70884.3	22408.3	42712.7	44586	44584.5
M1010T693			1.4686	1.74203	0.0827184	1010.03	693.412	33585.5	10149.8	21127.3	13628.5	13776.7	19838.5	24271.4	31605.4	9916.14	45504.9	30344.4	53650.4	23537.6	19803.3	23560.9
M129T246			1.46755	0.452526	0.0339902	129.055	245.84	84675.4	57935.4	32840	28665.4	41677.7	21579.9	14960.8	15959.2	34178.2	18648.9	19305.1	17941.5	15421.5	15609.9	15612.2
M348T76			1.4669	0.565088	0.00825553	348.292	75.79	50681.9	50545.5	68170.2	57726.4	70984.8	48546.1	32442.8	29355	58990.7	35173.9	31251.2	8677.13	44970.5	44981.4	47188.9
M275T390			1.46541	0.435869	0.0505196	275.009	389.727	75629.5	52396.5	37108.3	15126.9	28519.7	20077.9	18921.1	15326.6	29738.5	12202	13985.6	9578.53	7898.15	7905.17	8634.18
M773T317			1.46477	3.02137	0.0601402	772.546	317.394	9529.76	10347.6	5482.13	4323.85	10175.8	5569.96	8821.84	14323.3	11437.5	31613.5	16427.9	54633.8	13604.6	13900.4	13533
M340T612			1.46418	0.75916	0.0550245	340.055	611.763	212856	215355	178882	145007	143654	121862	145020	135866	148966	128041	133431	81208.2	118951	120259	120410
M839T645			1.4605	0.680484	0.0503347	839.052	644.995	104297	157910	97166.1	79140	104605	80006.3	87655	86161.6	91060.6	49606.1	72615.1	36927.1	43888.1	45329.9	45365.9
M563T725			1.46033	1.38909	0.15316	562.929	725.105	81451.6	22018.6	13021.1	101560	52682.7	86441.3	82368.8	90772.3	85658.2	76876.2	83851.9	76621.9	79082.3	77468.9	88083.4
M526T315			1.46015	0.454085	0.0519971	526.292	315.365	76454.4	52876.7	33774.5	17512.2	31775.6	21194.9	16432	19326	30145.5	9684.27	22239.1	8242.03	13915.7	13760.8	13760.7
M219T50			1.45578	0.844099	0.808459	218.996	49.537	138706	50050	26983.2	162525	48663.9	8974.16	22165.1	24641.7	248464	8209.22	36099.9	28364.7	10010	10294.8	10292.6
M634T66			1.45523	1.31714	0.81783	634.451	65.554	33048.9	175466	10611	4716.59	36055.4	2841.28	3832.17	5141.51	3866.78	8867.73	5877.45	318478	4002.67	3899.96	4001.02
M411T667			1.45463	1.00039	0.99884	410.985	666.774	208921	170458	221858	90645.6	246743	216337	345524	75761.4	251692	170818	62361	249259	126566	149768	128596
M680T413			1.45433	0.8909	0.353166	679.51	413.105	343730	229848	309853	400081	325508	327512	169475	276607	284153	312815	383167	299040	223282	247026	247041
M367T931			1.45401	0.726902	0.450589	367.139	930.77	199209	151527	64116.1	12124.7	53086.5	65002.1	50444.7	46792.8	109943	30797.6	105589	52643.1	20612	21170.3	21178.8
M135T365			1.45374	0.498303	0.251715	135.031	365.019	43592.7	215631	49210.3	26574.3	58182.3	37408.2	46379.4	25217.9	45156.4	27729.4	50755.8	19329.7	44307.5	44248.2	48130.6
M619T425			1.45363	0.37374	0.100573	619.287	424.533	57262	81847.5	22335.9	4586.69	21943.3	20261.7	12542.9	8426.41	21345.2	7292.58	18713	9506.55	8311.67	8313.67	7007.88
M135T267			1.45297	0.723734	0.151804	134.894	267.272	18706.4	75484.1	81226.4	113995	91638.3	98479.7	65706.3	39037.8	71851.1	62464.3	54672.4	53320.5	87533.4	69374	59786.3
M548T366			1.44734	0.674431	0.470665	548.369	366.178	140203	110545	26465.5	13379.6	30326.2	16304.5	70773.7	63547.7	27497.5	34730.9	18110.4	12773.7	35975.7	36372.2	36373
M485T627			1.44565	0.388871	0.1028	485.02	627.436	52173.9	89182.1	29564.5	12305	23131.6	11702.9	21143.2	11986.3	18171	9235.44	16623	7638.23	5123.71	5135.31	5502.83
M176T75			1.44131	0.0673476	0.265653	176.069	75.1645	3329.95	778.542	2623.52	138276	22393.5	1611.93	4631.28	2837.37	1180.87	928.634	792.235	1012.24	1572.85	1293.13	1569.78
M303T90			1.43935	0.663153	0.206759	303.232	89.917	279857	111429	135293	89714.8	127350	111960	80106.7	70413	137013	12867	163863	103135	73900.1	75580.6	75334.6
M372T312			1.43919	0.184685	0.05766	372.242	311.626	61425.2	35982.7	6169.01	97045.4	15205.5	13082	3895.52	9013.71	11244	868.52	3715.75	13538.6	3317.07	3317.52	2854.89
M464T318			1.43677	0.837712	0.635648	464.313	317.609	16553.8	22375.5	394892	257735	353883	247185	202942	148208	253573	120632	256619	100872	168952	170945	170977
M236T77			1.43619	1.52482	0.0097833	236.105	76.972	12357.7	15103.8	25049.4	12461.3	23052.9	19793.9	26066.1	22812	33515	29428.2	21425	31158	33095.1	33145.2	34152.7
M399T54			1.43598	1.35295	0.0562114	399.325	53.8865	32133.3	43752.6	21972.1	18027.4	39258.8	29158	34580.5	39341.8	38827.8	52620.7	35360.7	48620.2	25820.7	25143.7	25822.6
M345T95			1.43335	0.485443	0.00798194	345.242	94.543	47922.1	43194	48502.2	17310.4	36005.1	38785	32770.8	13666.3	18445.2	12125.2	26452	9026.69	11244.6	11538.5	11539.1
M693T336			1.43271	1.80371	0.0166449	693.478	335.988	10522	5530.39	22452	13152	21289	28247.7	35395.8	31280.2	31100	33722.7	15002.2	36021.8	9372.13	9859.34	10807.9
M789T180			1.43158	2.74042	0.0532355	788.523	180.006	2114.26	1058.02	8624.2	15700.8	5678.13	8343.44	4324.41	13521.2	7201.6	27949.4	25857.9	34924.6	13153.4	11971.7	11960.3
M485T54			1.43122	1.54711	0.138221	485.288	53.564	36192.8	23762.6	27744.1	18719.7	38022.2	39683.6	41633.3	23884.5	65766.5	86647.1	28957.2	37973.3	24668.3	24914.1	24830.4
M227T714			1.43101	1.50491	0.088703	226.987	713.526	36107.8	47589.8	59067.4	23962	31643.3	39983.3	93630.2	65774.9	42014.4	27147.2	62468.5	67665.2	83796.2	79533.9	103519
M393T700			1.43029	0.70003	0.0104057	393.011	700.426	89971.2	102854	94284.5	73806.8	87932	81608.6	66531.5	81548.8	79064.9	44850.3	62606.9	36733.4	50482	52253.7	50013.9
M242T238			1.42937	1.22355	0.460268	242.176	237.697	33574.1	42052.6	45499.6	97929.1	60783.8	37128.4	47244.8	70713.2	45294	114072	76189	34313	52122.1	54170	54176.9
M529T72			1.4288	0.369341	0.0245734	529.267	72.35	55100.7	40836.8	44060.5	21782.6	14158.2	13996.6	9393.23	14131.2	19885.1	6605.94	17062	3073.48	15688	15595	15824.7
M904T638			1.42677	1.28386	0.50466	904.008	637.92	18336.8	28657.5	29215	87079	24976.9	37540.3	25116.2	40040.7	41812.8	102185	27278.2	53470.2	47198.9	45426.6	43988.6
M655T695			1.4252	2.85252	0.035483	654.962	694.657	5230.35	6925.66	7503.59	8329.76	5185.49	11613.3	14391.9	43774.5	7739.4	27005.1	8932.17	25916.2	9634.75	9083.48	10001.7
M530T328			1.42448	1.3049	0.301237	530.286	328.172	16397.5	11469.8	51869.2	38095.2	37317.9	72402.6	48096.9	47801.2	49027.6	67054.3	28037.5	56916.2	30046.1	30056.1	32891.6
M807T151			1.42316	1.71004	0.363442	806.568	150.951	66160	92050.9	1.14215e+06	279907	363366	170860	537496	455855	461655	261833	1.60432e+06	294717	295802	238786	238667
M1096T639			1.42131	1.6177	0.0650343	1096.03	638.74	10904.7	15294.6	20730.2	17458.9	13378.9	34491.3	28958.8	19711	37242.4	24095.3	23220.4	48373.1	10934.2	12199.4	10968.2
M1049T695			1.42044	1.39752	0.134407	1048.53	694.657	9524.48	37536.8	52663	19971	36678.2	47015.9	45074.3	43047.4	46559.8	70666.5	35761.3	43131.4	33311.3	39702.5	39637.3
M530T721			1.41932	0.634712	0.147991	530.018	721.418	173935	278759	112973	69889	101110	106812	64660.9	76111.4	136830	73028.2	82446.8	102289	33029.2	33028	33087.6
M717T578			1.41887	1.3848	0.223666	717.466	577.991	3075.88	36320.4	49950.6	30718.9	23907.5	55919.7	32824.6	37530.2	58423.3	55572.2	28454.1	64008.1	14912.8	16084.5	14897.2
M353T213			1.41867	0.733114	0.575172	353.231	212.776	140902	35330.4	51959	12698.6	59957.3	297525	142592	39155	47503.5	58282.1	70720.8	80420.6	33630.3	33686.7	33877
M175T1123			1.41665	0.643578	0.228777	175.118	1122.58	95921.1	171306	13679.6	270428	103711	250539	98906.4	68036.4	106796	147938	85214.9	75922.5	88794.1	88453.3	90548.9
M267T74			1.41609	1.32759	0.0520534	267.232	73.606	22394.9	26282.5	31258.6	13024.3	21911.6	31646.7	27008.3	32966.8	31422.3	40731.3	26208.6	36179.5	29368.3	30023.9	30010.5
M357T870			1.41547	0.786401	0.0387254	357.055	869.709	324996	432126	347524	346625	388124	334021	291074	393441	304914	263018	275605	181124	252704	252701	253945
M154T709			1.41378	0.386678	0.186746	154.061	709.23	95621.1	86245.7	20089	5470.5	17174	9486.06	4044.25	10330.4	24228	19581.4	20116.4	12215.7	3069.02	4021.23	4048.71
M483T230			1.41329	0.656347	0.438207	483.271	230.379	7885.42	2340.01	323286	101490	277268	115581	95895.7	64045.9	140116	59037.7	156846	27416.8	97061	87205.2	87585.3
M679T297			1.41325	2.38718	0.0129852	678.504	296.925	10424.7	14494.2	20579.5	11728.2	25919.2	19370.7	46305.6	38404.8	65228.5	12865.2	29463.9	52457.3	18887.5	18892.9	18210.1
M556T726			1.41311	0.890519	0.66584	556.163	725.533	73976.8	87220.8	76110	57662.8	80321	196155	110310	85345.2	73795.7	65230	50980.9	123222	41907.3	41845.5	42792.9
M319T210			1.4127	0.349278	0.286386	319.226	209.995	19265	16723.1	32112	12648.8	49933.5	227947	14591.5	14217.8	17067.1	7792.67	25571	46021.4	11028.6	11706.5	10945
M248T41			1.41028	0.321872	0.0297175	248.005	40.578	39799.2	14003.6	19803.7	56737.5	30861.7	7814.25	7326.94	9321.04	14241.9	3552.92	10571.6	9388.49	3833.87	4675.33	3858.38
M805T302_1			1.41021	1.30269	0.126051	804.552	301.538	58284.3	84016	57576.8	38434.3	49913.6	48131.8	61994.5	95662.8	73738.2	40465.2	82657.7	83650.7	53819.1	53785.8	56898
M155T552			1.40971	0.682162	0.174531	155.009	551.979	131656	82874.4	63470.3	50381.9	72126.9	56368.7	58006.9	28171.3	92321.4	28930.1	75618.4	28616.9	38415	37723	38717
M248T643			1.40962	1.34126	0.328223	248.149	643.337	17304.5	16168	23130.7	64583.5	32063.7	51290	62044.7	28812.9	25503.7	58470.7	30600	68909.9	64139	64101.1	65565.4
M503T380			1.40863	1.28041	0.627733	503.294	379.75	44242.9	92013.2	7247.93	17270.7	7023.66	28126.3	81096.9	78630	27069.1	32922.1	27025.6	4121.07	53810	53634.2	41795.7
M797T79_1			1.4078	0.501021	0.00179928	796.61	78.6135	32224.9	47046.1	53328.2	53656.5	52820.5	48930.3	26148.7	39470.6	21854.5	23500.2	28497.1	4826.08	29921.9	29988.9	30013.1
M1061T690_1			1.40737	1.26879	0.402261	1060.51	689.765	17159	22200.8	35248.6	62337.5	52846	32403.9	27880.3	68872.2	25729.3	61229.7	28519.9	69688	37592.8	37651.5	30080.8
M723T77			1.40702	1.57003	0.657954	722.508	77.077	25363.7	106700	10253.5	6160.53	7291.04	13708.3	8588.21	11858.8	15050.1	20125.7	8941.61	201520	8981.77	7986.69	7987.45
M841T321			1.40635	1.25282	0.406526	840.572	320.523	49664.5	32187.7	23477.4	14995.2	39960.6	61485.9	38317.3	47659.9	35194.8	79820	21196.1	55651.1	22142.6	22180.4	23449.6
M386T67			1.40635	0.581906	0.0316558	386.27	66.832	93752.5	78112.2	55975	37051.2	53871.4	37675.8	39597.6	28030.5	44782.4	27908.7	43733.8	23360.3	28065.3	28044.9	29756.7
M765T77			1.40514	1.51008	0.0740357	764.522	77.19	31082.4	17717.8	23400.1	30331.9	21392.1	21464.7	26267.9	25506.3	36896	49903.1	23580.4	57395.9	32397	32376.4	33916.6
M779T281			1.40498	1.32488	0.38969	778.536	281.074	20509	26344.4	279639	172626	220097	94953.5	251479	239390	141367	122182	192979	131273	125541	115094	125464
M333T843			1.40356	0.673307	0.520691	333.058	842.501	200250	21048.5	324601	26434.1	299809	12112.5	13669.2	196273	244962	4143.64	97141.1	39185.9	88680.9	93250.4	88945.8
M821T657			1.40303	0.726784	0.197986	821.002	657.212	362425	352767	251883	89759.9	289337	255628	138675	115146	260705	116075	217713	315849	218959	233325	233209
M451T724			1.40237	0.562796	0.162914	451.085	723.843	60570	118461	47053.6	19860.1	50854.2	25540.2	43004.8	29664.2	47975.7	18285.7	33078.6	9402.25	14724.5	14985.1	14984.9
M681T425			1.40176	0.570455	0.139367	680.513	424.972	85376.2	253166	88647.5	114598	97075.8	73670	64784.2	18362	106732	30854.4	69730.6	116005	76780.8	77492.9	78068.6
M468T375			1.39916	0.239515	0.107926	468.334	374.5	91079.1	80278.1	11923.1	12061	13070.4	10251.2	10040.8	11718.3	9695.23	2310.22	10766.4	7842.16	3144.4	3207.58	4360.59
M602T298			1.39754	0.10215	0.118778	602.27	297.549	53647.7	68745	3953.14	3060.58	6310.42	3321.64	2548.73	2019.47	2768.04	3635.68	1807.67	1423.27	2412.46	2872.72	2836.28
M785T327			1.3968	1.28611	0.35474	784.581	327.297	66195.4	63587.9	40795.9	32798.5	44488.1	78277	30368.2	59998.5	93092.9	53038.9	54411.7	128546	36850.6	37020.5	40151.7
M379T48			1.39675	0.251062	0.0523185	379.283	48.362	18618.9	26351.7	80518.7	64365.2	15290.4	8771.17	8768.83	12011.5	4932.02	5512.8	8537.49	13943.6	3430.2	3431.44	3545.73
M559T456			1.39643	0.751923	0.217839	559.149	456.042	193797	196863	338784	86760.3	302809	217442	202479	189396	168614	110426	230640	103356	161878	169087	169350
M154T159			1.3961	0.243193	0.0452938	154.068	158.986	78958.4	51549.2	5649.38	28386.5	26912.8	12675	12388.7	3423.49	12512.8	1119.75	13177.6	7021.03	4179.58	4189.84	2900.97
M438T359			1.39556	0.368868	0.189349	438.298	358.776	10809.5	15392.6	16301.5	79404.6	21682.5	8595.29	6522.31	5992.18	6595.79	3811.93	23840.3	9373.96	26070.5	24799	24791.3
M736T302			1.39529	1.0751	0.767088	735.519	302.158	20435	40454.9	95776.8	100331	59837.9	88646.7	36287.3	108997	65336.6	88994.2	66183	70136.3	94048.5	96046.8	93918.2
M1143T690			1.39487	1.48189	0.423638	1142.51	689.657	3922.16	10239.5	7583.14	53925.5	44033.2	17296.4	22261.1	54943.1	6425.46	49701.1	8021.2	61666.8	34441.2	23618	34378.3
M302T645			1.39213	0.570479	0.0311494	302.122	645.478	63278.6	66361.1	55643	23458.8	40216.5	38413.1	37564.1	32885.9	32977.2	18105.7	33674.5	8731.68	23471.5	23485.7	24134.5
M626T590			1.39056	0.658598	0.074224	626.079	589.768	93172.4	121054	103463	40760.7	55218.3	70282	60237.1	52114.8	68994.3	37518.2	65798.2	34065.9	19422.2	18721.4	19028.5
M251T77			1.39028	4.43967	0.0968329	251.163	76.843	2849.9	3954.6	6052.55	2599.14	4553.79	2723.89	4950.42	38214.2	6979.93	4750.52	5829.19	40206.7	3173.33	3573.05	3554.51
M119T179			1.39008	0.20775	0.07094	119.049	179.131	14503.9	1594.03	13812.5	52919.6	30279.9	6257.72	5560.23	1032.04	6284.41	4324.76	7254.62	342.57	4112	4003.53	4111.23
M566T665			1.38651	0.606972	0.216055	566.041	664.788	104549	147279	51486.6	28752.1	37098.1	46604.6	31508.7	37799.9	81322.9	29385.3	39439.2	32903.9	15292.9	15159.5	16956.7
M114T324			1.38578	0.537166	0.0977106	114.03	324.183	83356.9	51195.3	24630.9	77795.9	58949.3	15667.5	25935.1	20150.9	61521.9	14612.5	22204.7	22953.5	10963.3	10974.6	11239.6
M801T313_2			1.38565	2.36871	0.0225106	800.578	312.65	11765.3	13875.2	8254.15	6613.38	6741.57	13076.6	8544.31	18207.7	17022.9	32106.6	24501.2	42512.5	15737.4	15098.9	15345.9
M146T645			1.38512	0.596414	0.0643579	146.082	644.995	72642.3	74925.1	49003.4	28251.8	47023.6	37512.1	42151.1	30217.4	44331	15823.1	44238.3	7744.87	20828	20776.8	21061.8
M291T625			1.38226	1.12556	0.41835	290.883	624.635	38748	137103	116593	77524.6	108648	114266	117586	109258	122623	105932	110714	101212	77284.8	56206.9	77099.5
M820T297			1.38066	1.44493	0.0342457	819.605	297.334	30666.1	32965.2	35759.7	34037.5	67978.4	50397.9	55862.2	58789.6	64718.9	40849.6	72249.9	71369	56639.8	62167.5	61881.9
M317T70_2			1.37748	5.18017	0.355327	317.174	70.364	8446.58	10790.1	4400.06	4289.14	5262.05	4395.9	167375	4174.09	3995.42	8556.31	4194.23	6395.69	3944.86	3067.47	4058.91
M921T646			1.3774	0.679731	0.0308551	921.055	645.542	87201.8	127666	92171.2	67243.8	81837.8	70076.5	67698	71733	75373.6	47853.2	63006	32008.4	41489.1	42827	42775.1
M292T213			1.37734	0.492498	0.156238	292.06	212.645	81705.7	51360.4	32152.2	908.813	53650.7	20261.5	25091.3	8624.28	41233.5	6801.35	33081.7	3386.74	5984.7	5368.66	5972.17
M511T645			1.37675	0.627219	0.0505057	511.038	644.91	74742.4	89004.9	62121.4	33483.9	63894.6	42660.6	42374.6	38526.4	56356.9	24535	49538.6	18173	29177.6	30468.1	30529.8
M203T36			1.37549	0.410955	0.334691	202.965	35.558	101634	27819.2	1526.28	66744	2921.37	868.607	13969.7	1460.04	59548.2	4777.35	1533.11	1524.33	3108.99	3057.77	1516.32
M203T37			1.3753	0.456452	0.187068	203.001	36.6855	93247.6	25119.9	14605.4	65821.6	36943.7	11646.4	12621.8	10582.4	62457.5	3689	11416	12152.2	4436.96	4427.33	4614.84
M204T665			1.37476	0.328099	0.236882	204.099	664.722	157324	1930.84	155151	1000.24	1148.66	97452.1	118149	652.181	3150.94	2804.35	7383.02	3696.35	136773	139129	139186
M403T627			1.37265	0.41587	0.123644	403.018	626.977	63305.2	77386.2	23501.9	8275.76	22800.1	11483.5	18604	11478.9	17421.9	8239.14	21515.8	8722.36	4869.52	5189.01	5193.93
M328T69			1.37263	0.588447	0.0126163	328.198	68.975	50909.3	58844.9	52960.2	46938.5	44369.2	44158.2	31046	25430.7	46101.3	19754.8	46509.6	6621.03	33022.9	33809.1	33800.1
M850T639			1.37132	1.45262	0.369307	850.024	638.758	17237.5	11134.1	52807.3	22997.4	22773.4	16794	17975.1	9324.99	15880.4	56915.8	41092.8	67616.4	18266.2	19503.8	18301.4
M269T470			1.37082	0.593517	0.0444714	269.087	469.815	82556.1	50574	74697	32139.1	62299.7	59553.3	48230.1	16381.5	50808.8	29480.4	57537.6	12307.4	30603	30655.4	29269.4
M461T49_5			1.36859	0.0760821	0.0066013	461.433	49.227	19450	31986.5	37328.5	39860.8	10331	1645.63	4076.19	1982.81	1126.35	611.056	1229.54	1671.38	1048.2	1040.23	1262.64
M291T667			1.36842	1.04943	0.663923	291.007	666.873	61225.8	53158.6	72775.4	60881.8	60442.9	75282.5	77664.3	54755.8	62070.1	83755.4	45961.7	78528	61212.3	71019.6	37743.7
M333T39			1.36723	2.21603	0.41189	333.005	38.5745	36406.1	36268.5	18929.6	18685.1	14372.5	2930.43	27139.9	33316.5	194173	5895.25	9840.94	12382.7	3045.31	3005.77	2975.46
M287T549_1			1.36712	0.535765	0.275065	286.977	548.639	191394	45437.3	38284	35330.1	45661.7	28140.7	41013.2	33959	42799	31752.3	30354.8	25988.3	23299.1	23875.3	23311.4
M226T1008			1.3659	1.5633	0.269081	226.083	1008.25	13200.2	18355.6	40561	24060.5	15813.4	35449.2	24562	23854.5	44151.1	88699.2	13821.2	35404.3	25276.8	20686.5	20927.3
M191T1127			1.3627	0.707525	0.22546	191.019	1127.48	47020.9	53984.3	44630.9	137202	51574.5	65541.7	37629.3	52099.1	47796.9	37067.1	42371.8	66013.5	48331.2	49170.2	37056.5
M756T719			1.36139	1.87922	0.00499384	755.956	718.555	19433.7	4622.05	9528.61	10401.8	15613.1	27485.7	28005.2	28286.2	22197.7	31288.5	25564.7	28310.1	27032.6	27288.9	28869
M371T853			1.36028	0.446879	0.464392	370.978	853.244	47322.6	255427	12308.4	4569.29	11717.2	8506.69	44216	46887.9	43101.6	6607.11	5820.61	5239.3	7598.35	7741.13	10493
M205T58			1.36006	2.16588	0.459302	204.981	57.601	49298.3	18724.4	12988.6	33617.5	28237.9	4852.63	20043.7	22771.6	236420	4865.91	13308.1	22532.8	4799.26	4798.85	5352.03
M255T184			1.35922	0.652447	0.224867	255.232	184.092	179906	49178.5	70509.2	172942	55926.8	50410.2	70616.7	61727.3	66485.3	43378.7	58561.5	76914.9	68995.4	51636.5	72514.6
M337T872			1.35884	4.8501	0.18811	337.142	871.882	3195.37	4534.78	7347.05	4365.91	1503.27	8917.3	6401.92	85060.3	3085.66	40569.6	5567.67	4156.72	5729.13	5341.76	8528.25
M803T307			1.35781	1.62627	0.361604	802.592	306.585	10910.9	27199.2	26534	25761.2	32448.2	72697.7	28064.5	139585	23840.4	18304.5	28529.8	79694.9	25152.5	45345.6	19988.3
M738T426			1.35736	1.41578	0.233247	737.563	425.566	33513.3	50517.3	37784.8	41114.2	41866.8	42258	105153	46076.9	38093.7	83633.4	62037.6	14779.7	38032.7	38187.3	38032.5
M1115T700			1.35708	1.21709	0.496045	1114.99	699.631	44304	55226.6	29750.1	14208.6	13738.4	58977.1	51086.7	39223.3	34428.1	60124.2	14331.6	63947.8	29390.1	29195.7	36123.3
M547T54_1			1.35642	0.550743	0.0464087	546.523	54.131	43059.9	78440.7	60541.6	113393	47482.3	35292.8	44352.8	29669.3	38421.3	30825	45037.5	19990.7	37615.8	37614.3	36530.9
M619T439			1.35633	0.653618	0.203335	619.287	439.1	98614.8	146522	57346.8	20842.3	71375	59993.3	53383.5	38156	85965.1	30866.8	52525.9	36299.3	25203.2	25230.4	23559.3
M839T261			1.35491	1.28141	0.562244	838.621	261.42	30042.3	53558.9	54241.9	38698.1	45562.6	144312	80535.1	178753	58115.3	96372.9	25612.9	30138.2	66454.6	50942.3	52449.9
M676T316			1.35393	0.108712	0.21735	676.488	316.022	55657.8	158069	3304.96	1975.84	3204.88	4261.83	3472.79	5018.76	5016.04	1802.33	3785.43	5525.12	2167.57	2324.1	2324.3
M768T638			1.35341	1.55189	0.159688	768.02	637.522	9037.18	21362.5	20890.3	22108.6	16801.6	22490.8	22813.6	22359.5	41757.9	24879.5	9321.5	53752.2	19157	17228.6	16200
M567T632			1.35312	0.515517	0.219769	567.005	631.706	56108.4	143613	41405.3	14116.6	39669.7	22960.2	34075.3	36357.6	40457.9	19248.3	15933.8	17796.1	12777.9	12857.5	12856.7
M763T186			1.35306	1.71622	0.169354	762.506	185.664	3934.64	2045.33	26487.9	33440.6	16130.9	25658.6	6401.26	42721.7	34436.5	54531.8	21059.1	25683.4	16464.2	17097.1	16823
M88T616			1.35229	0.345259	0.0430681	88.04	615.639	55131.5	38339.5	24177.2	14107	13560.9	11530.7	13588.8	10870.5	15001.2	6196.37	7010.79	1485.12	4807.87	5903.52	5036.22
M637T350			1.35214	1.13966	0.799437	637.417	349.82	37351.9	20680.9	27949.1	10608.6	33882.3	176364	41058	61822	29394.3	81969.8	42076	93370	35931.5	31797.6	35771.5
M130T522			1.34978	0.469069	0.231943	130.087	521.69	80560.6	186169	19022.4	38068.2	24396.8	34169.1	51862.6	32919.7	30543.3	22898.6	12203.1	28938.4	11342.4	10823.1	11366.4
M393T53			1.34515	0.843643	0.316293	393.285	53.1875	484353	483018	278622	272341	234899	248017	276253	256127	279526	335421	287887	253127	155642	161142	155634
M232T105			1.34469	1.91572	0.334531	232.046	105.277	18919.4	50234.6	2280.2	5274.52	3201.21	5910.94	19284.6	71438.7	2538.42	41844.8	6992.33	22310	16408.7	16325.5	9871.93
M635T49_1			1.34338	1.25931	0.304314	634.538	48.652	48559.1	40276.4	34248	23546.5	44097.6	44858.4	28360.8	56366.3	49069	86603.8	30752.9	45522.2	51151.1	49390.3	49382.9
M391T685			1.34169	1.40407	0.167543	390.993	684.848	17606.4	9414.11	38928.6	21899.2	32717.3	36324.8	33128.7	46608.9	35612.2	43535.3	13375.7	48024.4	35875	35802.2	28593.4
M249T57			1.34072	0.556684	0.158388	249.007	57.321	70928.3	25202	15567.6	105647	42079	34531.1	20257.5	19667.4	37764.7	37803.9	16647	31499.3	21463.9	21411	19273
M986T656			1.33966	1.05214	0.787845	986.011	655.883	47006	80596.9	53028.3	10878.6	55313.4	51713.4	51578.1	59484.7	51469.5	46028.4	48647.6	56893.8	39812.9	42556.1	39928.6
M912T711			1.33964	0.521106	0.0387181	912.325	710.907	44277.8	72547.9	43044.1	27479.2	26779.9	31778.5	21578.5	35673	29345.6	15908	20516	5122.77	11724.4	12424.1	12417.9
M420T907			1.33933	0.505486	0.0431355	420.162	906.711	51241.6	85148.2	57998.1	24184.4	30263.9	31413.8	26033.9	26446	36158.6	12234.3	24112.6	16677.3	12083.1	12038.2	12176.1
M365T277			1.33777	1.76403	0.111023	365.208	277.312	3974.48	29290.5	9378.78	4571.17	8451.54	21540.2	14902.4	25791.7	10107.3	21262.8	29068	35062.9	14199.5	13993.9	13465.7
M336T75_1			1.33497	0.0945544	0.280662	336.109	74.547	3507.79	1722.39	1766.08	120948	16592.9	2365.83	753.056	2481.59	2654.85	1823.67	2862.57	3314.59	1802.83	1744.33	1804.16
M377T54			1.33451	0.196109	0.342022	377.324	54.1865	17106.2	9775.91	273823	11829	6659.05	8094.57	8805.65	19924.2	16156	9287.38	8184.06	1826.72	101726	11092.5	101639
M891T640			1.33356	1.64096	0.0421151	891.024	639.517	7349.74	13081	15737.6	22074.5	10304	15762.9	15940.3	24879.3	18013.8	16416.9	26508	36590.6	17038.5	25454.7	17812.3
M1002T370			1.33329	0.160754	0.0422364	1001.69	369.646	52014.9	49080.2	14930.4	2841.62	25879	4274.62	4150.18	2156.5	8798.85	143.25	8384.48	322.438	2407.51	2182.96	2405.11
M259T905			1.33264	0.121807	0.106296	258.987	905.179	74233	2842.58	3030.91	21581.4	1586.47	39730.2	3119.52	3291.38	4108.01	3691.73	1663.79	1544.57	2978.11	3077.76	3079.15
M678T68			1.33165	1.29052	0.831497	678.477	67.949	28270.8	161902	9016.31	6421.18	28723.6	2595.19	2668.88	4622.84	4825.35	5049.99	6432.08	282163	3226.47	3279.87	3226.06
M259T906			1.33133	0.629779	0.105421	259.022	906.359	72830.2	101591	79897.1	23236.1	68901	38752.2	59266.5	45112.7	57391.4	22748.2	33818.8	24258.5	23256.5	23313.3	25485.5
M180T405			1.33052	1.33639	0.447907	180.032	405.402	25296.5	69726.5	32452.7	9394.45	19719.2	43631.8	206.999	62025.4	46751.8	69084.3	23238.4	66266	84.984	84.4834	94.7631
M420T883			1.32951	0.691067	0.331339	420.162	882.694	115620	139923	57058.3	8762.62	40056.2	98830.7	59576	47902.7	85868.9	37430	77185.2	10101.3	47353.3	47911.6	47980.9
M453T312			1.32884	1.24134	0.174113	453.342	312.1	36990.5	35887.7	75276	72710.8	89748.2	82668.7	63542.7	78947.7	94004.2	82137.3	96598.2	72966.5	76440.3	76734	72942.9
M958T646			1.32742	0.644151	0.00536203	958.147	645.532	73227.6	81451.6	82215	59667.1	56022	64627.8	45425.2	61151.4	55035.6	33260.5	47339.1	26535	34464.1	34613.2	34613.4
M269T794			1.32734	2.45106	0.0896497	268.973	793.607	9385.75	11041.7	10993.9	5903.27	12806.2	11683.7	7345.81	7918.02	53728.2	13532.3	42528	26458.3	9349.42	9351.37	9593.43
M349T37			1.32638	1.656	0.524259	349.002	36.788	70940.3	41145.7	11829.9	15427	19783.1	3747.87	29680.6	33912.9	167726	2746.68	11462.4	24191	2541.42	2544.54	2586.74
M317T66			1.32629	0.436155	0.00629961	317.304	66.0825	37481.6	34575.6	43803.1	24810.7	20294.4	20940	15764.7	18142.1	17890.4	5792.5	19558.1	2191.16	21248.9	21251	20892.3
M772T791			1.32234	0.445334	0.0439618	772.315	791.492	47013.7	61000.4	41837.2	15017.7	23381.5	17445.5	21019.3	17363.2	24575	8984.08	17397.5	2264.53	10226.3	10224.2	10474.6
M866T61			1.32189	1.08594	0.834183	865.501	60.557	252945	55724.9	87591.3	74243.6	24385	103258	18832	85481.9	180091	90282.5	144230	130634	87126.9	83825.8	83373.3
M501T590			1.32095	0.674567	0.103337	501.065	590.429	91875.3	107307	99073.9	41391.9	53303.4	49506.6	43544.9	46545.1	66881.7	37112.5	71110.1	33273	22748.4	21945.1	22754.2
M302T419			1.32065	1.6527	0.185387	302.195	419.446	19613.5	23336.7	13240	27905.5	12782.3	12076.6	14607.5	50537.8	13710.2	57165.1	15693.3	28355	15821.2	15816.1	16561
M311T179			1.3197	1.38886	0.342922	311.221	178.886	15846.1	15923	27747	9163.67	35525.6	40650	22868.2	24109.7	29503.1	19663.5	33032.3	72006.8	24254.6	24207.1	19464.2
M348T700			1.31865	0.798139	0.0524142	348.1	700.426	187233	165699	162487	130422	133093	142308	134827	125176	148940	94307.3	145795	86235.2	84047.2	83538.8	87900.1
M568T691			1.31716	1.26898	0.526765	568.49	690.73	26149.8	37297.6	64244.1	127527	121123	30680.4	116093	22759.1	127523	141082	30908.9	78137.3	79458.4	86794.4	86753.1
M332T810_1			1.31703	0.625904	0.0536557	331.996	809.547	66259.6	92349	58507.7	35633.3	60877.7	43221.3	52298.1	48942.7	45962	26105.4	36895.3	13149.2	26822	31390.1	26773.3
M823T634			1.31637	1.69568	0.11959	823.008	633.612	12404.6	19239.5	17319.8	9222.18	18558.6	14750.9	20659.7	20427.4	23484.4	54284.8	11055.3	25236	36622.5	32447	36383
M573T48			1.31513	1.48338	0.0835143	573.486	48.124	29046.5	35751.5	16430.5	17159	21703.9	23233.4	19527	33765.9	35877	58556	31889.1	32990.4	34797.5	36516.2	34796.8
M194T664			1.31211	1.03443	0.901705	194.117	663.513	40607.7	14744	69291.8	94455.5	104761	74228.6	86242.8	54068.3	29685.7	102557	48371.8	90870.3	67000	78731	77076.2
M716T674			1.31159	1.23816	0.41089	716.041	673.958	39494.5	75340.9	29053.9	42250	35594.3	29645	81647	58901.6	72966.3	29220.2	28696.4	39815.7	25183.8	33845.6	31391
M624T398			1.31144	1.39538	0.0258268	623.502	397.656	25962.9	22403.9	19168.3	26153.3	21764.3	29618.9	30113.1	33262.9	34062.7	32892.9	23692.6	48405.1	27305.1	13685.1	26874.6
M536T48			1.30981	1.44696	0.0881184	536.165	47.937	30576.1	27318.3	20260.4	28775.3	28545	16203.5	34677.6	38317.2	37613.5	60443.6	20547.2	27874.4	77656.1	78292.8	85493.9
M740T736			1.30965	1.663	0.184732	740.491	735.774	8967.04	8582.21	13860.6	14652.6	10613.3	26649.7	14609.2	17146.5	11112.6	44340.8	13211.2	38149.9	31417.7	25113	25259.4
M369T381			1.30844	1.02002	0.955731	369.227	381.31	86717.2	113683	49935	6318.99	42840.2	102925	59244	35674.6	59239.4	50387.5	56436.5	149495	23211.6	23628.3	23637
M478T346			1.30777	0.75588	0.49044	478.292	346.005	61630	73871.7	253806	104345	381585	164786	240899	47634.8	51486.5	158305	169784	118023	154308	148016	154044
M647T567			1.30728	0.76956	0.215515	646.874	566.894	215911	173305	140520	75614.2	115312	102414	89164.5	118634	157196	83011.3	102913	82489.3	25203.5	29135.4	29052
M303T78			1.30386	0.454395	0.251859	303.195	78.4695	13854.2	14257.1	12620.7	81600.3	17209.4	11744.4	13664.4	10861.7	10729.3	10987.3	11603.2	10897.7	9620.88	9894.73	9895.9
M739T194			1.30295	0.887708	0.85221	738.506	193.964	4747.06	2736.6	35123.3	131455	20119	36597.2	9244.78	71911.4	13580.3	27716.7	15812.5	66597.7	25711.5	25904.3	20920
M171T766			1.30216	0.364937	0.0776838	171.006	765.632	45065.4	51194.2	27735	2858.71	17773.2	7734.03	10889.5	8315.53	12773.7	5990.57	14110.1	3522.49	6493.21	6787.25	6782.37
M339T210			1.30004	0.362288	0.154275	339.031	210.223	20935.3	90732.3	39114.2	5117.11	29791.3	5878.31	16826.4	7745.16	20169.5	8930.36	12986.2	2745.37	8405.43	8331.37	8405.4
M283T74_2			1.29927	1.45445	0.721656	283.193	74.282	1471.59	4488.48	1766.64	122829	2735.8	5573.4	1462.61	123673	5173.86	3873.87	2768.6	65019.5	1544.76	1884.59	1588.38
M586T691			1.2975	0.770548	0.0210159	586.055	690.94	202361	219921	141903	209589	168068	181805	120847	125730	185979	138173	162820	132274	89171.8	90662.4	89176.2
M233T181_2			1.29528	0.642242	0.122938	233.118	180.606	62305.8	26330.9	98942.5	53834.4	93682.2	98985.1	49194	31021.8	86281.2	19165.9	52513.3	40608.7	13083.7	16655.1	16605.9
M1015T642			1.2948	2.2309	0.0813073	1014.53	641.889	1870.53	7383.15	6634.1	10202.8	8541.06	11103.3	7988.64	29808	5500.1	24632.7	6720	27380.8	7545.47	7060.17	7075.07
M293T719			1.2929	0.989607	0.968703	292.959	719.032	694766	545455	139768	657929	172394	328583	349974	506886	273637	340373	489046	552594	486981	380122	499956
M271T70			1.29134	1.0302	0.868976	271.227	69.888	110812	134110	155935	66819.1	120539	205823	173896	118735	185497	108625	122984	108280	76776.6	75759.6	75771.1
M353T573			1.28971	2.1067	0.515036	352.866	573.284	1660.54	867.642	971.786	1000.73	155679	590.606	1289.54	938.307	860.927	145352	189659	594.156	62666.5	77326.5	8947.26
M481T730			1.28887	1.36712	0.128607	480.926	729.53	38144.6	42707.4	11338.7	19016.5	37351.1	44648	54558.8	47710.3	28805.8	32281.9	47516.5	53263.6	58036.5	51417.7	51473.1
M279T79			1.28866	1.03219	0.891684	279.196	79.428	114341	74709.2	62357.7	9399.06	84941.3	64752.7	55945.8	63028.6	102216	57460.1	67411.6	77653.9	39348	41218.7	41256.7
M452T383			1.28855	0.555653	0.0975553	452.312	382.959	26719.6	15439.1	45299.6	28941.4	69880.9	45232.3	17629	12666.1	36989.5	4341.13	34690.7	22324.3	6737.37	7385.19	6739.47
M186T687			1.28805	0.364949	0.0677782	186.038	686.653	37680.3	70176.4	17005.8	17076.1	23510.1	11384	9596.23	9200.62	19128.5	4899.32	9786.43	11923.8	2196.4	2395.98	2202.91
M515T811			1.28788	0.411176	0.132744	515.212	811.033	60403.1	74496.8	11855.5	18683.4	37662.9	8555.43	8938.95	21098.1	41847.7	2476.27	9389.44	3278	10362.9	10368.9	10564.3
M243T66_2			1.2857	0.879133	0.648125	243.206	66.216	293355	254917	136098	361958	143659	259427	92211.8	260374	386540	91220.4	309214	134667	133748	133754	135637
M129T186			1.2853	1.07838	0.795649	129.019	186.084	87299	77220.2	41234	11557.9	39014.7	38175.7	59037.4	50480.6	90490.1	39619.3	51484.9	26471.9	23992.5	25512.2	25409.8
M205T405			1.28525	1.61399	0.250229	205.063	404.871	12899.1	32373.3	23517.2	904.788	14459.4	17475.1	10685.7	52822.1	17927.7	39536.1	7657.11	35398.7	11039.5	10683.2	10681.9
M1184T694			1.28371	1.91037	0.0537695	1183.51	693.623	17914.5	17994.8	7462.1	15383.7	40302.9	10486.6	15541.1	25056.7	47876.7	55047.6	35114.5	30634	32321.1	32374	24758.1
M104T669			1.28338	0.496116	0.189677	104.106	669.339	115317	27081.9	41789.3	15381.7	44069	34239.4	15795.7	15966.8	22350.9	7073.82	62472.2	14200.3	16593.9	18714.2	16779.8
M810T683			1.28208	0.582327	0.143285	810.014	683.142	62587.3	189533	77079.5	62652.5	70643.1	63366.3	50751.2	88999.9	74435.2	37637.5	28864.8	25534.9	22084.8	18402	22076.6
M826T713			1.28169	1.21331	0.227276	825.978	712.544	17051.5	32727.4	34808.2	59429.2	51250.6	48954.4	49478.1	51770.5	42351.2	52153.6	42720.1	57841.7	46865.9	46865.7	47030.8
M401T1126			1.27974	1.12084	0.528287	400.932	1126.23	80789.8	33411.7	53546.8	24324.3	53920.7	51065.9	55846.5	77138.2	47354.7	48843	52498.4	51275.5	52178.4	52233.5	54192.4
M204T342			1.27964	0.282722	0.0834425	204.066	341.882	26094	8468.43	5361.33	50673.4	29290.6	2929.61	6077.87	2533.05	10722.1	2586.77	7354.6	5448.91	1825.4	1828.64	1884.8
M583T70			1.27435	0.421333	0.00877126	583.314	69.836	41008.7	28995.7	34202.1	19021.9	15097	18998.1	11619.9	15323.7	15910	7123.12	13768.9	2539.95	16183.1	13615.9	16191
M253T78_1			1.27319	3.10869	0.270809	253.05	77.572	17584.5	11472.5	5477.91	4354.86	17867.7	4487.22	12397.3	14546.9	122890	14705.3	7965	17886.3	8551.5	5644.26	8532.69
M745T567			1.27112	0.664288	0.172114	744.851	567.246	104834	128301	62470.4	34136	49969.6	44950.6	39504.7	52951.3	70565.9	35762.9	44765.6	38547.4	10380	11827.8	12053.8
M227T35			1.26989	0.407928	0.11366	227.265	34.836	46804.2	31106	1131.71	75432.3	57231.1	6610.97	10199.7	10359.2	8640.57	10095.2	17676.9	32085.8	6668.86	6023.03	6664.72
M557T388			1.26974	0.6775	0.11668	557.135	388.143	87084.8	107651	72347.1	38128.9	65314.1	58330.7	66148.9	58648.2	58189.7	31037.3	65709.1	10817	38701.7	38766.4	41182.2
M222T298			1.26828	0.151606	0.0299574	222.025	298.337	30544.5	7993.43	14936.5	42010.8	14568	933.852	1074.05	2676.69	4354.76	3117.39	1161.21	4442.17	2218.19	2225.08	1587.13
M77T1257			1.26389	1.76534	0.163226	76.9694	1257.29	18107.4	17556.7	35236.5	876.976	22555.9	12568	35464.2	16256.6	31554.8	20336.2	67098.5	18006.7	25261.3	24099.8	25270.4
M906T373			1.26385	0.48276	0.0497724	905.707	372.938	23541.9	28778.1	20164.6	46113.4	20657.8	52866.5	7340.41	12358.3	37218.7	7196.79	19239.8	9394.95	10705.8	10681.9	10022.8
M571T364			1.26332	0.771808	0.321516	571.358	364.448	109287	135419	204684	121081	174210	97133.6	187584	146543	112273	65319.8	128389	9610.63	108415	109176	110177
M563T808			1.26299	0.849225	0.490694	563.077	808.038	84733.6	196574	127027	36094	102177	137780	108821	128309	96802.1	105172	80567.4	61525.7	80465	83202.6	83191.9
M129T676			1.26076	1.03658	0.857327	128.952	676.46	41038	117043	67731	69220.2	72620	67858.5	66302.9	75155.9	71432.9	118892	40966.2	78693.1	92167.1	97178.2	97092.1
M1091T660			1.26063	1.28831	0.189826	1090.97	659.712	16345.9	26027.6	42567.7	38515.1	24566.3	23216.5	42356.8	47008.1	35562.3	45097.9	19783.9	30799.4	17766.3	16936.4	17580
M430T728_2			1.26018	0.391039	0.036615	430.103	727.72	14766.1	67682.1	68043.3	20335.7	68284.6	22445.1	18685.3	17281.3	15591.3	16924.4	20422.4	13374.4	17591	17247.9	17245.7
M307T421			1.25993	18.5909	0.342597	306.964	420.817	870.677	1068.53	297.249	1498.82	592.924	779.087	231.053	698.45	1994.3	90954.7	254.404	816.566	183.162	263.139	265.048
M463T69			1.25913	0.387363	0.154334	463.287	68.935	98502.2	38714	8192.22	14836.8	35315.6	13144.1	10809.8	8961.31	19794.7	15601.6	15575.9	10101.2	18458.4	40547.3	24785.2
M901T691			1.25904	2.32323	0.0112181	900.97	690.862	7552.72	10881.4	8318.96	11800	9311.55	21567.6	33227.3	32336.3	41977.1	24180.7	15629.8	13955.7	11279.6	11256.7	10250.3
M258T745			1.25901	0.623546	0.0386937	258.109	745.376	72170.9	54811	47041.3	32811	46011.5	44979.9	31765.2	38624.4	37915.4	24940.7	46272.1	6190.23	27054.8	26419.9	26403.9
M62T1269			1.25847	1.39196	0.214267	61.9883	1268.83	21637.8	37129	34064.4	19368.5	28335.2	13335.8	32930.1	39459.1	24530.1	34933.3	64612.7	17716.9	33878.3	49381	37321
M355T65			1.25772	0.563837	0.689261	355.32	64.518	164409	2481.29	2653.3	4655.35	1570.16	924.631	689.618	1362.89	1246.3	758.552	94807	761.8	878.132	881.301	735.876
M604T322			1.25666	0.559743	0.267856	604.313	321.599	22090.8	8390.64	184208	93940.8	75102.4	51544.4	46926.6	43648.2	57099.6	22643.4	64223	9102.11	40986.9	42152.3	42146.9
M589T49			1.25653	1.40189	0.28053	589.481	48.734	25386.2	46754.6	14140.7	9256.73	13504.8	16050.4	19845.5	28897	16443	46205.8	24398.3	39577	24989.1	25583.2	24979.2
M271T79			1.25487	2.17914	0.0101459	271.206	78.678	8092.02	6737.12	7394.79	2144.69	6865.32	10656.3	15008.3	22081	6477.07	19844.7	11029.8	16844.1	3750.86	8134.81	4847.31
M250T159			1.25384	0.906893	0.741754	250.093	159.284	217192	179727	133348	133484	241002	120199	179889	63446	282515	75309	268612	59751.4	84121.4	84701.9	93572.7
M278T79			1.25369	1.80021	0.519849	278.183	78.6345	5003.86	28466.2	4453.04	20819.4	29890.9	2493.19	2492.85	4542.84	39771.4	3415.02	4272.58	109552	13760.1	31148	43273
M974T683			1.25263	0.558513	0.173235	974.02	682.87	50250.8	133580	47899	38740.6	40671.4	29348.1	16345.4	49092.6	50669.1	17345	40019.8	16695.9	9226.02	9162.62	10354.6
M333T421			1.25256	0.960094	0.879573	333.008	421.21	115461	437379	159675	112487	189975	212763	260205	201988	164769	180400	232022	139362	245888	261463	261774
M217T44			1.25001	0.407809	0.117883	217.017	44.001	33200.5	15337.6	9019.75	60749	31723.4	6204.85	7005.12	8448.33	26863.7	2679.69	8116.21	10601.1	2829.19	2990.66	2827.43
M681T462			1.24972	1.29206	0.467149	680.513	462.12	17102.9	14555	57938.2	28907.8	15039.5	55770.2	46207.6	15002	17371.3	68554.2	37358.3	60111.7	25598.8	23006.8	23108.9
M298T91			1.24595	0.944659	0.881724	298.274	91.46	24231.1	14237.6	121836	95887.9	136332	87980.7	26472.3	55911.3	161587	38288	106109	65546.7	61270.5	61436.8	42319.9
M336T72			1.24509	0.0979224	0.332748	336.147	71.5845	1887.94	3512.47	3550.7	122593	2125.05	1795.45	1685.27	1772.23	3109.17	1148.72	1852.42	3697.18	2190.37	2079.86	2190.16
M1173T696			1.24429	1.13503	0.673952	1173.04	696.464	40852.9	105894	100987	29491.7	64094.3	54275.9	55410.3	128439	34707.6	114541	77094.2	38821	47457.7	27887.3	47505.4
M567T628			1.24241	0.476382	0.143908	567.022	627.512	42163	94981.4	30542.6	15292.1	26015.7	15683.2	21528.8	19543.5	22176.4	11917.6	20084.5	11781.8	5016.14	5310.33	5230.38
M353T97			1.24131	0.156662	0.157834	353.045	97.2885	3926.68	5146.79	5443.71	52346	15209.5	3219.35	3211.92	3246.71	964.115	1640.17	3745.09	554	2329.58	2164.24	2325.76
M445T877			1.24099	0.63326	0.181462	445.014	877.285	46186.9	94235.1	75755.2	5898.96	53506.4	43669.3	42699.3	28343.7	55857.2	19899.9	34901.1	20468.2	18613.3	18984.3	18981.7
M269T78			1.24054	3.22989	0.159003	269.175	78.197	24782	3639.24	1773.08	1924.15	2191.59	1625.66	44350.7	28151.8	2309.74	1352.61	36778.3	3125.12	38938.9	38952.7	42902.8
M749T78			1.24009	1.1532	0.304538	748.526	77.527	47323.9	45923.1	78661.5	103010	71793.2	57889.7	70119.8	85028.7	71476.8	69363.8	81449.7	89147	69598.5	68958.6	68669.8
M111T177			1.23884	1.18711	0.399846	111.02	177.268	59828.2	37073.2	59809.9	28513.8	42209.2	37130.1	39839.1	35642.9	80959.6	38099.8	70601.9	48922.6	19812.2	20622.5	21352.9
M405T609			1.23808	0.515329	0.0310288	405.048	608.988	52967.2	58614	37430.6	23917.7	29814.5	17942.8	21938	22002.6	21430.1	16411.5	24898.7	7045.37	20584.4	20584.8	20202.4
M1031T782			1.23782	0.665418	0.0670397	1031.33	781.938	50746.7	87602.8	66828.2	44199.3	60875.6	47673.8	49509.2	51794.9	52926.8	27967.2	46787.5	9184.98	32306.5	32852.6	32306
M582T57			1.2333	0.480314	0.0356512	582.49	57.1455	42090.4	57603.5	28133.7	27009.9	20759.3	20662.9	12812.2	15524.7	30338.3	13619.8	19691.9	2279.36	17568.9	17316.3	17317.2
M375T76			1.23325	0.146444	0.0570051	375.176	76.4985	39352.1	34301.2	33719.6	4112.19	2179.37	666.258	2070.87	2003.2	3481.31	2410.34	1427	5350.36	13062.2	5770.72	12865.5
M928T630			1.23307	0.507684	0.0740459	928.043	630.001	21025.5	85568.7	46660.2	36833.1	33660.2	36704.8	12488.2	42793.9	36925.6	13819	13622.5	12578.1	9486.58	9486.29	9330.43
M676T700			1.2325	0.682209	0.0204099	676.112	700.034	84559.4	105926	72047.9	56840.9	64060.3	67966.1	63748.6	59259.2	58272.2	44726.7	50609.4	31333.7	45407.9	45677.5	45678.5
M238T784			1.23236	0.664994	0.057121	238.045	784.171	70360	110729	66045.3	47183.5	57862.3	52045.4	54877.2	48919.5	58985.1	33738.3	42938.3	29349.5	31253.9	30711.4	30709.8
M284T55			1.22978	9.97625	0.116612	284.259	55.332	4399.22	7672.34	4283.11	2849	1670.82	874.604	2022.63	2186.65	116695	64371.2	28285.6	3413.01	25772.1	25732.7	6950.88
M254T75_3			1.22843	1.25256	0.0708782	254.42	74.928	15125.9	17012.4	29473.4	25785.3	31050.9	31296	30813.2	27456.4	35188.1	31797.7	29874.4	32432.8	32642.4	32657.4	34361.9
M170T632			1.22669	0.503883	0.231806	170.043	632.268	64979.7	136666	32517.2	13184.4	27509.3	18963.7	24829.5	22865.7	22089.3	20893.1	31004.9	26368.4	16819.6	9924.5	16556.8
M372T356			1.22624	0.443587	0.0797552	372.31	355.553	34127.2	6114.41	26609.5	21293.1	50693.3	31839.1	4170.69	2914.63	37171.4	2236.71	14090.9	15125.6	2065.18	2159.92	2068.31
M300T55			1.22535	1.6455	0.494658	300.251	54.83	2873.11	43868.3	18817.4	30457.2	1273.92	3299.36	3915.51	3103.87	30077.4	38786.5	2581.4	87055.6	14692.9	14705.3	4704.66
M680T667			1.22373	1.52823	0.0343775	679.511	666.592	22198.9	8214.76	24904	33363.4	28194.4	31811.3	47930.9	26750.7	25964.1	40786.8	45752.4	40042.4	64097.1	64098.5	65327.5
M767T299			1.2236	0.881631	0.683694	766.573	298.631	128496	154383	122599	90284.1	153078	378636	125919	149995	175148	79538.1	129941	245313	91851.5	95675.7	95704
M589T569			1.22334	1.13036	0.246523	588.832	568.502	46049.1	36000.2	28674.3	26613.4	31960.2	34006	39725.2	38093.5	47905.9	35562.8	37051.4	31466	14534.1	14743	18521.9
M519T629			1.22307	0.490771	0.0612059	519.029	629.499	24845.2	68244.5	34651.7	18410.5	28735.9	20970.6	17731	21374.1	22873.2	11801.8	15352.9	6988.73	6942.25	6722.89	6726.22
M613T49_2			1.223	1.29662	0.339454	613.482	48.625	29836.8	49393.2	15284.7	10433.8	18596.3	19497.7	25521.8	32416.9	16969.4	45628.1	27199.7	37735.3	28138.1	28689.2	28140.1
M136T36			1.22105	1.42056	0.286195	135.97	36.396	20367.9	26805.6	37092.7	15561.3	21239.5	22695.3	29469.3	24868.8	26177.4	75901.5	22894	24911.7	31978.7	32014.3	29033.1
M619T667			1.21958	1.04153	0.873779	619.018	667.021	107334	31643.3	25609.1	105320	54924.6	46524.4	75957.1	83639.7	53309.4	55628.9	48273.6	69969.8	76827.1	60700.8	59287.4
M151T441			1.21947	0.330453	0.032531	151.061	440.688	44831.4	23430.4	21923.3	9744.88	18902.3	7732.49	10616.3	3545.43	10049.4	3167.83	11803.6	2641.1	2485.62	2542.28	2540.82
M884T680			1.21911	1.24316	0.722257	883.971	680.18	7881.51	15005.8	44595.7	4132.07	56317.8	73961.5	10064.5	96582.9	11873.9	15728.9	9636.38	107101	44568.4	44921.4	30663.3
M590T63			1.21891	1.16905	0.891592	590.424	63.061	35625.7	168224	10149.8	5845	33725.1	2905.58	3919.61	5258.76	4788.15	6226.25	5583.73	274055	3664.11	4041.6	4237.2
M129T731			1.21888	1.2678	0.475574	128.952	730.979	169132	70691.5	374645	81392.1	369508	150933	389377	98225.8	348101	212775	331510	162033	347973	348035	313643
M713T645			1.21886	1.19277	0.668607	712.74	644.787	25643.2	74158.2	14588.1	62427.1	15050.7	6596.99	7243.36	43662.3	28024.5	57798.2	33337.8	66655.5	26072.9	17742.5	26118.8
M175T1142			1.21869	1.0896	0.809889	175.118	1142.44	18554.5	75651.4	182165	76537.1	110859	59847.8	120648	60671.7	71906.6	195256	56263.8	65784.7	56991.7	59706.8	61983.6
M213T1370			1.21855	1.89254	0.0997029	213.015	1369.87	11779.5	7934.59	10042.1	15172.1	13111.9	8858.23	13169.4	40509.5	5216.14	13643.6	31902.9	22166.5	13210.4	13235.8	13614.5
M399T783			1.21786	0.24682	0.0192594	399.046	783.26	31161	27695.3	15951.9	5420.62	10604.4	8088.22	5704.52	5210.45	4661.65	1411.74	6506.35	921.126	4363.36	4284.87	4324.58
M207T534			1.21769	0.698123	0.412182	207.206	534.367	132021	60299.7	33181.9	15698.8	51801.8	46945.4	48312.7	13597.4	64573.2	16285.2	78166.6	16391.1	26013.9	25681.2	26014.4
M506T369			1.21685	0.734377	0.273565	506.36	368.975	128134	127259	70666.1	59055.7	60848.7	50942.7	110114	58248.9	60724.3	72619.4	43732.2	19477.7	55068.5	57410.8	57425.1
M552T376			1.21367	0.562144	0.0968355	552.4	376.152	21691.6	16998.6	31598.9	69990.6	40799.7	29888.7	10597.1	9121.27	29109.4	22807.9	23200.1	23758.7	7169.7	7168.92	6733.51
M812T664			1.21223	0.552514	0.108765	812.052	664.062	61492.2	88718.5	30493.3	18844.6	33942.3	31536.3	24937.3	27079	33311.1	7495.93	29888.3	23719.5	10353.3	11350.9	11336.4
M191T737			1.21163	0.0336146	0.0468589	190.992	737.421	926.59	460.718	35066.8	1587.94	36256.9	41070.8	567.219	586.636	912.901	470.802	1064.18	276.378	16034.7	16035	16143.6
M616T657			1.20954	1.78123	0.00507056	615.992	657.246	8704	10613.3	13753.7	11018.9	6399.65	6849.11	20126.6	12621.6	17497.8	15168.4	23643.7	13075.3	14657.2	15800.9	22141.6
M508T380			1.20794	0.644241	0.308875	508.375	379.815	109365	125055	32334.7	32339.3	30930.1	26648.4	61914.6	37594.1	27103.1	54690.6	33494.8	14986.4	32248.5	32248.1	32003.4
M266T731_2			1.20745	0.636519	0.119433	266.097	730.585	39618.2	119244	121098	86462.4	94770.8	58504.2	41112.7	96120	23744.1	38055.2	93738.2	38027.1	63059.3	57065.8	56923.8
M99T894			1.20741	1.1349	0.53773	98.983	893.619	33822.4	70522.4	53527.2	12981.5	45711.5	52193.1	43158.9	68201.7	47040.2	53761.4	33358.2	59493.9	30315.4	30737.2	30322.7
M104T771			1.20728	0.793374	0.190426	104.106	770.885	139796	154889	112285	69837.7	93437.9	92231.2	84275.5	115825	113249	68708.4	87266.4	56268	71639.4	73860.6	71534.1
M156T667			1.20704	0.613803	0.152759	156.027	667.003	90799.8	126368	35058.2	28867.7	42688.5	61344.7	52101.8	22823.1	46503	40739.1	42470	31754.9	19242.4	19210	19952.7
M136T183			1.20665	0.262067	0.246023	136.048	182.91	17554.1	9158.15	2198.36	5425.5	4589.68	73716.7	2312.06	6205.1	8596.16	4926.81	3595.18	3884.63	6925.88	50520.2	51561.9
M826T289			1.20639	1.30499	0.659138	825.581	289.185	3613	5444.17	13267.4	12584.8	24919	86351.9	21525.3	40169.3	18247.6	16338.2	15238.9	79244.8	19240.5	18287.9	18275.9
M287T65			1.20604	1.02081	0.947696	287.07	64.655	57437.5	84243.6	51356	3724.45	29448	37025.9	34125.3	47639.5	22206.7	78574.1	40911.2	45255.9	37325.1	37324.8	37882.7
M279T776			1.20491	1.96591	0.00634122	279.208	776.255	9081.78	11144.1	9923.01	10377.8	12384.1	15548.4	26208.9	19852.7	23093	34525.2	18299.7	12605.1	8151.29	8217.57	5031.67
M199T78_2			1.20338	0.707712	0.227495	199.17	78.1435	66321.2	61164.4	157146	192925	96342.1	55657.8	76776.3	88146.7	77090.5	75568.7	52355.1	75607.7	50885.1	52592.6	52528.5
M790T81			1.20252	1.01493	0.902035	789.616	80.838	83420.5	109973	88052.4	71791.9	61590	80366	79621.1	115697	81714.6	81186.4	62165.3	82205.1	80829.3	83930	80814.3
M494T285			1.2024	1.76212	0.00165858	494.119	285.413	3760.5	8825.52	8745.42	7157	12106.3	13723.5	15282.5	13837.7	16074.7	15688.2	15619.9	19212.4	10959	11760.4	11742.6
M319T134			1.2024	0.271265	0.140281	319.227	133.996	77459.5	26617.2	20191.5	6551.81	8072.87	7761.88	8183	4461.15	6985.59	6122.45	6031.24	7998.93	3743.35	3744.13	3793.29
M319T764			1.202	0.556448	0.372186	319.259	764.062	59464.1	185946	59449.8	17496.2	18396.3	18019.2	7313.09	37956.1	31296.9	17816.3	78390.9	26864.6	12652.2	12651.8	12250.3
M535T413			1.20176	0.332844	0.0410245	535.153	412.593	33242.9	41401.7	20510.4	7531.09	11691.4	10404.8	9997.92	11286.4	2232.26	4756	11575.7	1684.76	6497.5	6110.06	6125.03
M261T967			1.19964	0.5644	0.0335596	261.037	967.409	51422.5	66485.5	50314.8	19402.9	41705.5	31288.1	31561.2	29007	36156	14471.1	20052.3	15846	14253.8	14668.8	14674.5
M295T577			1.19731	1.32259	0.194632	294.902	576.615	13756	38948.8	20052.9	28193.3	24682.5	21077.1	27113.4	36873.8	50571.5	18673.5	33715.2	27091.3	20707	25458	25325.9
M281T58			1.19633	2.58404	0.213174	281.137	57.709	6779.58	5387.64	2308.57	16311.9	39527.2	2729.3	1915.84	3997.59	3735.69	42634.8	73641	62824.4	19503.9	10475.1	19529.8
M250T178			1.19627	0.820382	0.486902	250.093	177.954	124442	104630	77817.1	59170.9	88841.8	44991.2	67438.8	38267.4	128075	29857.6	109510	36954.8	44034	46895	46957.9
M645T366			1.19622	1.78598	0.0436022	645.494	365.586	10133.9	6622.51	19506.3	11114.4	18784.1	12659.3	9963.18	29389.5	17937.7	24306	20980.6	38195.2	9099.03	11193	11099.3
M602T307			1.19612	0.552333	0.0690542	602.3	306.815	40216.4	66977.9	44938.9	16052.9	34773.3	25450.8	20395.4	19926.8	27516.1	12068.1	37716.9	8535.15	18649	18339.6	18339
M382T48			1.19501	0.270545	0.0244606	382.338	48.2485	34082.1	22794.6	48299.8	38480.9	12100.8	1320.19	2649.56	6466.79	9959.41	7258.26	7358.29	8804.49	3771.66	2588.8	3758.36
M748T73_2			1.19452	0.291922	0.106346	748.452	73.103	41215.7	2550	2099.56	77297.9	52468.7	39961.5	49998.7	2068.51	1580.19	2310.09	2399.25	4579.66	45459.4	45615.2	45614.5
M253T93			1.19448	0.673366	0.355881	253.217	92.7905	170121	140998	28188.3	28787.6	64283.2	47503.2	51159.2	13178.8	84791.1	77796.6	56478.3	39731.3	42053.9	50440.2	48740.5
M137T620_2			1.19393	0.877699	0.199559	136.939	619.69	701992	776505	538987	495603	511368	554019	484263	567373	625519	466648	507649	489373	346092	343134	343136
M629T49_2			1.19336	1.45317	0.247166	629.476	48.847	23049.2	37244.2	9001.57	5454.79	11265.9	17247.8	21115.3	18710	12710	38431.1	22329.8	36763.3	21148.4	21249.9	21249.9
M116T550			1.19113	0.755484	0.520876	116.071	550.312	98946.4	62808.5	33382.3	60568.6	32715.2	19915.9	19572.3	11650.2	91108.8	15110.6	79339	16162.9	10975.1	10986.6	11343.2
M358T79_2			1.19008	1.76166	0.00528112	358.24	79.318	8219.3	12477.8	11453.8	3173.01	7058.95	10134.6	12284.2	15446	21220.2	14849.8	13248.1	15469.3	8043.49	8254.08	8041.73
M537T54			1.18741	0.644752	0.0019603	536.502	54.149	48316.1	59246.4	67280.6	65080.8	57877.3	48567.6	39284	39605.8	41215.4	40426.7	43768.1	19022.1	55536.2	54340.7	54344.3
M257T49			1.18723	0.148544	0.0045305	257.21	48.778	17457.4	25261.3	28613.5	29284.6	8747.64	3935.01	5058.85	1887.76	4530.25	1428.97	1226.08	2698.04	3164.66	2560.65	3181.03
M508T396			1.18722	0.824784	0.660314	508.375	395.527	21455.3	28286	76240.1	81130	64560.8	40280.7	13123.2	6860.55	42673.8	6850.5	83225.1	104560	8104.71	8113.97	8552.82
M739T302			1.18676	1.37333	0.227629	738.534	302.21	5381.37	6221.72	28524	32914.7	18484.9	31292.5	14445.2	37690	27859.3	28646.6	28828.8	31201.4	27824.4	27852.6	25332.9
M198T784			1.18487	0.596969	0.0337249	198.052	784.171	44544	63259.7	44198.6	26143.7	35416.5	26773.1	29478.7	23908.4	29025.7	16892.4	32392.9	11774.7	17813.4	18083.8	18218.6
M299T67			1.18484	0.70219	0.10194	299.258	67.492	77066.6	67337.7	91758.1	42155.1	68070.2	106774	68053.7	46416.2	88204.1	41951.6	41561.1	32019.3	43621.1	43093.6	43612.7
M97T1213_1			1.18456	0.979588	0.951048	96.9597	1212.94	179250	58101.6	67486.8	118241	81907.5	72640.4	69163.6	82495.7	55523.5	45931.3	213373	99350.2	141185	142532	90778.5
M428T48			1.18417	0.130842	0.0149101	428.287	47.615	13254.5	21643.5	27726.6	40603.2	9253.7	2215.79	2906.56	1319.59	2990.01	2420.39	2702.37	2668.31	1829.78	1809.5	1829.54
M501T689			1.18306	1.74644	0.147992	500.991	689.103	9542.42	16808.6	9464.39	25887.1	20478.1	5794.08	37668	27729.3	13749.4	48941.2	11946.1	13608.7	36758.9	34546.9	34537.4
M814T303			1.18139	0.896842	0.827997	813.614	302.524	64452.3	104585	43709.7	33030	105206	367654	104342	118874	78235.8	43854.3	98534.6	200663	60013.1	58423.6	58134.2
M361T51_2			1.18081	2.24095	0.404764	361.312	51.123	5045.8	3504.52	5359.96	4867.78	1994.9	48524	1054	1390.95	1210.37	12297.8	51618.9	87719.3	7278.57	24963.5	25006.1
M526T395			1.17976	0.905512	0.785026	526.291	394.844	46146.6	63767.8	171958	86191.8	111810	113545	55284.5	12286.7	161414	18603.1	146555	143206	20758.8	24352.7	24389.4
M846T630			1.17962	0.57386	0.144717	846.039	629.523	35913.5	145241	74174.3	56132.4	56726.9	38856.7	31738.6	70410.7	55152.6	27940.9	22706.3	25637.5	12935.8	13843.8	13853.6
M171T224			1.17947	0.262761	0.0911279	171.102	223.647	49217.4	49236.7	6325.23	7319.25	14160.5	6277.62	3159.92	7282.25	6120.44	8939.11	3434.88	5888.86	7140.02	6863.81	7138.08
M315T79_2			1.17909	0.731333	0.179384	315.195	79.289	120417	95416.5	94302	30870.2	96072.1	136812	76470.5	59479.6	115308	50635.1	68153	49657.9	43167	47306.8	47267.9
M275T75			1.17788	1.41226	0.0885142	275.2	74.531	15482.5	15467	17610.9	4417.46	15505.3	22886.8	18246.1	24128.9	19741.9	29847	13906.5	23167.9	19665.1	19690.7	20184.6
M320T665			1.17738	0.680676	0.224144	320.033	664.999	107940	125300	49410.2	24934.9	63338.2	43003.5	49067.6	36070.2	67827.8	29159.6	55255.3	44369.7	16831.9	18579.8	16885.4
M184T362			1.1765	1.48043	0.147103	184.073	361.538	21420.2	28871.9	34301.2	43385.2	32640.7	65333.2	64687.5	86845.9	76910.2	40394.8	35909.5	29759.4	38948.2	38991.2	41212.9
M702T67			1.17639	0.0761465	0.260108	701.556	67.0585	128199	18398.3	2471.37	4558.14	3252.74	2051.48	1728.9	1901.63	2555.76	1606.81	1814.1	2494.82	1453.27	1378.28	1379.67
M219T49			1.17612	1.21501	0.858687	219.033	49.4015	89301.8	1572.09	991.589	112057	845.823	8508.21	367.712	24872.2	223558	8126.09	1043.87	1165.58	6852.17	6853.25	7114.97
M666T34			1.17606	0.471639	0.315701	666.058	34.169	116719	52143.4	9794.67	11780.6	3839.38	23551.4	35496.2	27242.5	11940.2	10212.2	10759.5	7085.77	14715.9	14721.9	14158.8
M518T696			1.17586	0.25161	0.0129519	517.977	696.389	5657.79	40616.5	37599.7	38325.9	27807.3	9932.19	4972.9	1455.22	5625.06	11484.4	2086.04	14618.8	20962.6	17666.4	20969.8
M237T831			1.17552	1.19616	0.236403	236.902	831.095	24163.9	21208.5	36407	21362	44936.8	37574.1	42208.7	35930.8	43759	38802.5	26362.4	35005.7	30925.7	34764.9	34739.9
M226T872			1.1753	1.20181	0.41028	226.083	871.703	41625.1	41305.8	71587	48613.4	39442.3	36964.5	85655.7	74993.2	24872	66839.7	46033.7	37557.6	73158.2	56724.7	75729.4
M558T105			1.17481	0.408511	0.0195462	558.301	105.378	43276.9	16399.5	39226.5	24086	13073.3	19074.9	11779.1	16048	12719.1	5901.71	13888	3039.27	15767	15772.6	15445.8
M230T297			1.17452	1.47446	0.253238	230.247	297.402	50550.7	12092.4	22861.7	14990.6	16960	23535.6	39138.3	21336.1	37915.6	66307.4	23659.5	19529.6	17279.4	20477.8	20496
M129T294			1.17423	0.170798	0.00300675	129.065	294.352	41521.1	16731	13957.5	16375.4	15111.1	18295.7	5444.63	1126.97	5080.94	2644	2576.69	3962.73	4482.62	4421.58	1730.17
M445T633			1.17369	0.492319	0.0172741	445.193	632.62	57380	49386.3	43670.5	32159	30551.4	16494.9	24727.1	23719.7	13394.3	22882.2	23058.9	5275.04	36192	35332.2	36194.5
M445T858			1.17324	0.588254	0.160886	445.014	857.651	42540.9	73668.3	51673	3657.84	35585.2	26765.4	29487.1	17384.1	40143.7	11518.3	25062.4	13991.7	9841.72	10099.9	10102.1
M544T691			1.17275	2.72158	0.174533	543.981	690.889	4406.41	8464.2	20540.7	9369.89	1011.04	8165.64	15782	70396.6	9417.98	27804.2	10787.6	7218.88	11348.3	6091.49	11312.5
M353T848			1.17005	0.711015	0.168627	352.967	848.452	54371.8	139633	101830	36741.8	101381	76341.8	75551.8	72834	75350.8	50632.3	52130	36331.8	47870.5	49198.2	49153.3
M307T467			1.16992	0.660447	0.115403	307.044	467.236	110972	82809.5	126823	60415.5	135933	106779	143276	43896.4	52540.1	27044.4	87179.7	58005.7	91810.9	84077.4	83764.7
M596T308			1.16945	0.733458	0.431723	596.333	308.224	128887	46940.6	74507.4	32173.3	43384.2	42424.3	101849	40851.2	63437.3	23327.9	30745.8	9934.21	26900.7	26895.8	28489.3
M393T184			1.16795	0.418646	0.265645	393.226	184.438	120047	28773	24278	7422.55	9605.11	21387.4	15629.4	15317.4	16245.1	6617.11	16239.7	18500.3	6314.44	6316.31	6535.7
M927T629			1.16556	1.23869	0.266266	926.968	628.823	20908.7	24366.5	30628.9	11382.6	29947.8	22985.7	20767.2	41835.6	16034.9	30092.3	32941.9	32018.1	26198.4	36766.1	36782.4
M355T68			1.16416	0.720516	0.211322	355.263	67.775	144843	92670	91194.4	37542.1	80442.2	59047	58864	35381.6	96770.9	50937.2	79545.4	42894.3	46882.3	47799.4	47795
M77T1237			1.16403	0.689296	0.328245	76.9695	1236.97	25867	25938.5	23476	91655.7	51561.6	15160.1	25784.9	22286.3	33778.9	26985.9	27443.5	24780.6	26374.3	26453.4	27261.6
M269T68			1.16403	1.79113	0.521555	269.045	68.378	45946.3	38455.5	12938.2	5847.68	22658.4	3704.58	17489.7	17525.3	161659	4100.61	11148.5	20119.6	2555.35	2158.84	2170.09
M767T74			1.16388	1.19402	0.826203	766.534	74.115	23126.8	104077	6944.79	46318.9	36001.5	13913.6	17839.2	29057.8	16895.4	6217.54	11259.9	193810	12189.9	12202.9	13101.6
M764T309			1.16234	1.40514	0.00999383	763.593	309.085	23627	27372.9	25266.6	18100.3	24544	28118.1	28703.8	33917.4	35704.4	25411	38544.9	44315.3	33748	35839.3	33651.3
M135T407			1.16197	1.82098	0.189551	134.894	407.295	3138.61	5527.93	10959	15572.3	8407.01	13049.9	7746.12	11909.3	15457.4	15506.7	10260.1	42287.8	11937.2	12164.7	10387.3
M303T72_2			1.16164	0.88314	0.929972	303.157	71.6385	3466	3028.75	701640	1129.82	1709.67	2145.43	1234.8	792.673	608963	16902.3	700.174	1191.64	1308.26	1296.69	1450.78
M315T298			1.16147	3.62251	0.0243841	315.137	298.202	1153.19	3259.33	3157.85	1300.2	5333.17	3690.65	4423.01	6446.78	5382.63	12217.5	13198.2	23154.5	6326.83	6047.65	6047.35
M291T510			1.16114	0.608569	0.0590783	291.069	510.074	96977.5	88873.5	55713.7	21811.4	53343.2	55845.2	32300.5	43789.2	45731.9	32703.9	40267.8	31937.7	19166.3	19163.6	19774.6
M316T64			1.15991	0.572215	0.33933	316.121	64.01	25324.8	21748.9	9974.74	80255	25328.7	8866.31	9221.89	10690.3	44786.5	10360.5	9493	13581.9	4792.13	4487.7	4493.05
M226T914			1.15915	1.23865	0.43345	226.083	914.053	101910	35581	82891.4	30297.5	81022.2	156744	84135.7	146677	144356	68859.4	74744.6	86240.5	71284.8	73047.7	71244.4
M398T480			1.15893	0.347126	0.209613	398.264	479.587	59465.5	40355.6	9193.28	2382.68	5386.23	8319.47	5446.67	722.609	22831.4	2541.56	9997.63	1886.6	2495.08	2503.06	2598.17
M1049T699			1.15778	0.701612	0.029818	1049.03	698.613	60629.6	99653.5	84238.6	56174.8	58652	64675.5	50296.7	50464.6	63968.7	41508.3	57083.1	34179.1	48592.9	48578.3	45669.8
M732T83			1.15778	3.45763	0.18158	731.541	83.079	27567.9	22354.9	3541.77	2151.18	5037.47	8165.04	82903.4	2154.13	9114.71	17309	114037	12430.1	21404	22120.7	22105.2
M462T281			1.15538	0.10034	0.164691	462.329	280.581	58715.9	30635.7	3437.08	938.814	1847.95	1625.86	792.361	1009.17	3380.96	1082.12	2167.64	1320.95	1067.69	681.525	1061.51
M690T365			1.1535	1.22182	0.581447	689.558	365.088	8123.55	10216.9	47539.9	54836.3	42996.7	54924.1	15480.5	28798.7	62257.5	19094	59016.8	82488.5	16492.6	17017.7	17240.7
M287T530			1.15329	1.11519	0.73302	286.977	529.779	27025.5	185869	175493	70551.9	206693	107826	251845	72186.8	128689	120161	217182	72488.2	84312.6	84391.5	86048.3
M494T635			1.15193	1.50539	0.0387118	493.992	635.093	17619.4	11950.7	12195.4	15619.1	17617.2	16729.4	21094.5	30451	34055.8	19899	17279.8	15310.8	15931.1	14548.5	15885.8
M479T40			1.15183	0.985517	0.946524	479.281	40.267	158325	89807.6	95508.8	37587	67313.8	96903.2	59611.9	95661.8	94623.4	115284	112135	60229.1	94353.9	93202.1	93934.3
M534T700			1.15179	0.709495	0.0946396	534.087	700.25	84252.6	112787	65537.5	45660.3	66369.6	72316.4	66887.4	64012.2	66794.2	46662	51856.2	20877.9	44800.1	44769.6	42930.9
M201T37_2			1.15149	1.2735	0.720921	201.022	37.367	102263	42008.8	16644.3	28499.6	23305.6	9106.61	21085.1	10994.2	164699	29997.4	19631.1	36091.3	13966.4	13353.3	13955.3
M411T74_2			1.15092	0.358944	0.0420758	411.287	74.09	15713.6	23928.1	55293.5	9566.38	42024.1	16465.3	11947.4	8342.89	13727.1	5230.41	14893.1	4363.73	15316.4	15766.8	15313.5
M221T77			1.15063	1.58465	0.00617633	221.153	76.972	8584.82	8250.44	14432.9	7098.87	13035.8	12675	14886	16035.4	22089.7	18149.8	12728.8	17650.8	19354.5	19788	19761.4
M448T330			1.14957	2.67066	0.288468	448.341	329.547	84514	35894.8	41092.9	20536.9	36901.6	101440	99179.9	59916.9	528914	47465.8	106174	13975.5	53593.1	53559.8	49665.6
M655T710			1.14853	0.625189	0.0481515	655.222	710.352	53141.6	76791.6	52474.9	36844.8	36210.2	42172.1	29293.8	47708.4	44043.6	25961.5	28198.8	10872.3	18718.3	18783	19464.4
M224T667			1.14744	1.67086	0.00229543	224.127	667.397	19673.4	6627.3	17626.2	16563.9	19120	22240.6	30352.7	27073.9	25244.9	29573.4	34945.8	22988.3	43732.2	43735.2	37891.9
M155T852			1.14651	1.12683	0.291035	154.975	851.631	36575.8	35274.1	33529.4	17878.2	41320.3	38069.4	45723.6	34826.1	37253.8	40798	36763.1	32984.8	34842.4	37540.1	37445.5
M233T109			1.14565	1.68065	0.4688	233.058	109.15	6359.78	40992.1	6918.07	2191.89	7442.6	6572.31	12946	21974.4	2524.37	61720.1	6187.24	13095	12074.7	11720.2	11712.6
M477T39			1.14467	1.26878	0.255599	477.266	39.439	34286.7	25143	18391.9	7935.62	17686.9	22340.9	18402	29920.8	22180.6	39502.7	24429.5	25158.2	28808.3	28132.5	28729.6
M388T132			1.14425	1.75194	0.190021	388.254	132.102	29010.5	17600.1	24668.8	34736.8	81144.7	24141.1	26449.2	92349.7	127339	38687.9	32540.3	52821.7	13778.6	15934.8	15999
M860T298			1.14396	0.889394	0.843168	859.591	298.203	22542.2	12485.2	33377.5	8665.71	72539.4	171112	37912.6	41911	38001.3	17715.2	32501.9	117206	12918.7	17325.9	12377.7
M307T274			1.14369	0.605524	0.111496	307.083	274.374	2510.78	39318.3	43529.1	52878.9	45680.3	42162.2	26949.4	18129.5	39137.2	16566.5	27978.2	8135.73	16380.5	16382.8	16750
M248T780			1.14097	1.47283	0.473711	248.065	779.954	6265.36	3011.21	21216.1	37911.6	43510.9	18192.2	15096.1	19683.1	29075.2	91065.3	13654.7	23051	76674.3	104055	103847
M306T35			1.14085	0.14343	0.122859	306.063	34.552	13212.5	3250.32	3250.85	63256.1	25610.7	4569.68	4017.76	2220.73	934.226	1114.2	2272.69	5669.56	1317.42	1310.42	1384.73
M281T894			1.13926	1.40409	0.03191	280.963	894.165	12533.1	21969.3	22514.1	8899.71	20608.1	18421.2	21698.1	29610.3	22484.6	26640	18854.5	28065.4	19380.2	18599.8	19380.1
M674T294			1.13916	0.0837106	0.164523	673.516	293.856	40204.1	91757.9	3319.9	3166.9	4364.46	2491.94	2709.64	2775.34	2153.6	1451.89	881.696	2191.41	2347.58	2439.02	2349.05
M249T45			1.13903	1.13043	0.662504	248.96	44.684	71256.3	49609.9	36550.3	16821.2	24657	33917.8	54310.3	78841.3	28057.7	39045.6	30102.9	32819.9	23503.2	24598.5	24548.8
M1033T693			1.13841	1.26592	0.513654	1032.99	693.415	25512.8	10716.8	38458.7	29450.8	14782	27644.6	10317.6	39116.8	17615.7	35204.3	15866.9	67419.2	51985.8	52628.3	52626.2
M344T72_1			1.1378	0.445058	0.285653	344.185	72.119	6808.69	4238.41	3040.71	39882.7	64509	35345.2	2407.13	1527.05	47689.2	10946.7	1755.91	4134.92	10459.8	2786.6	10342.2
M290T791_2			1.13678	1.08796	0.673648	290.159	790.55	117952	65206	59682.1	41790.7	77520.6	65301.4	93255.6	89642.6	108590	65813.1	40631.7	67117.2	49342.7	48678.9	49342.2
M513T829			1.13651	1.08417	0.584229	512.821	829.134	45873.6	56529	56353.4	24375.7	56632.4	51508.5	52172.6	58544.7	58091	67886.2	47802.4	31292.3	50246.9	54996	54988.7
M387T55			1.13607	0.315668	0.204621	387.325	54.8255	4148.4	98056.7	58190.9	1772.05	5350.19	54838.8	2398.74	1197.18	1035.52	3539.16	58744.6	3275.87	43504.1	45862.4	45897.9
M279T107			1.13548	1.16004	0.626151	279.232	107.132	60569.9	39788.4	15809.4	4648.71	29958.7	42415.8	52223	41378	37556.6	53771	16735.6	22443.9	19959	22043.1	19950
M817T295			1.13479	1.2634	0.269904	816.583	294.924	20587.5	36720.1	51585.9	32825.6	33955.1	35412.1	29664.5	50157	43736.6	29647.9	39077.6	74401.9	46924.9	48427.3	46940.7
M229T803			1.13405	2.36689	0.281941	228.977	802.51	32436.5	2063.41	2005.09	9262.52	1762.05	597.521	45646.9	743.26	2220.67	27144.1	1282.01	36874.9	20632.3	21370.2	21357.7
M885T700			1.13193	0.70658	0.0295072	885.029	700.034	77988.6	134718	111568	83691.3	89957.6	64920.3	71519.3	73503.3	73381.4	59398.4	66358.9	53532.6	59886.4	61765.1	60419.8
M591T635			1.13093	1.35978	0.182098	591.023	635.059	15289.4	21054.3	9500.42	30901.6	29474.4	8873.96	24563.5	34105.5	28280.3	31321.3	23414.1	14818.2	24932.3	30384.7	25006.2
M700T351_1			1.13032	1.78553	0.162051	699.541	351.12	10932	13637	19472.3	8045.21	61327.6	5518.13	30434.7	58977	42953	26388.5	18399	35205.2	24258.1	25272.6	25212
M612T69			1.12896	0.430442	0.00473412	611.536	69.405	42209.3	25028.1	20031.9	45289.3	21377.4	26163.5	19237.1	15053	11802.5	8510.24	13167.4	9752.17	23469.6	22242.7	22238.6
M227T341			1.12884	5.96031	0.00489222	227.013	340.751	1031.22	2141.65	1632.36	1210.83	2324.88	878.23	2609.7	5198.01	7374.85	16870	12278.5	10618	8548.76	8563.04	9108.59
M399T565			1.12836	0.663928	0.701334	398.893	564.612	2436.3	2218.42	963.688	77350.6	2429.91	78672.1	102603	1508.43	1169	1510.76	969.584	1170.91	1008.05	1124.22	1005.02
M127T41			1.12828	0.674617	0.682838	126.904	40.578	53074.2	563789	30129.4	13129.2	38855.8	30070	38774.1	148867	35198	41403.8	21292.5	206292	18906.1	18904.4	17592.8
M403T731			1.12622	0.464751	0.0608606	403.148	730.633	33851.9	40929.1	20319.4	9953.32	15229.3	13545.2	9740	9744.79	19756.9	5065.04	15036.5	2853.54	5262.53	5440.66	5439.03
M80T531			1.12458	0.727584	0.242421	79.9569	531.35	115206	155963	61549	67805.4	107617	46824.4	91661.9	58900.7	111200	41538.3	56405.2	44078	48051.9	54268.3	54025.9
M221T187			1.12374	0.256775	0.0630234	221.066	186.877	31854.2	4274.7	7747.15	35599.1	13679.5	4268.36	6405.51	2029.19	3862.83	2870.92	6148.83	3698.52	2908.28	2918.25	3212.16
M932T638			1.12367	1.21018	0.603984	932.027	637.543	16938.6	21801.8	33345.9	25756.3	10775.4	31734	16717.6	7508.57	19988.7	48333.9	17441.6	59860.8	16800.5	18664.3	21296.5
M908T711			1.12307	1.12777	0.562289	907.983	711.337	58091.2	38569.7	38770.6	9600.79	38127.7	46337	42900.8	49681.5	21198.2	52622.9	39827	52588.3	34445.8	24807.7	34167.9
M282T93			1.12171	0.645839	0.122177	282.251	93.1165	78497.7	132292	76387.1	39704.1	79403	49157.1	58970.2	8249.84	67162.8	58646	60330.1	40783.2	50766.8	50813.5	52283.9
M319T99			1.12135	0.851027	0.413377	319.227	99.196	151092	147924	204197	48367.8	126415	164296	156552	71248.2	140027	100359	123943	124684	81519.2	81519.7	80788.8
M375T69_2			1.12049	0.582964	0.0917033	375.274	68.915	83340.7	43567.4	52182	12342.4	34529.1	47627.7	31387.4	23084.2	33967.4	15890.9	37754.2	17408.6	21399.7	21103.3	21105.1
M840T299			1.12046	0.642896	0.0579516	839.627	299.098	43104.9	62987.6	59324.7	58678.7	55951.4	35075.6	27938.2	63220.9	48327.2	19519	28888.1	14698	43244.6	39601.5	39345.2
M167T847			1.1199	0.759159	0.156158	166.975	846.863	106389	225943	155436	93544.5	183635	138807	148072	114576	150794	97558.7	102778	72315.7	91984.2	95364	95304.8
M635T690			1.11926	0.462597	0.0548742	635.052	689.595	32999.8	43143.2	20904	13177.6	17092.8	11849.4	12291	11510	18397.5	3214.65	16550.2	2414.78	3473.84	2959.94	3487.23
M231T358			1.1192	0.342137	0.13602	231.077	358.443	32939.2	6769.72	3882.46	44019	20902.1	2602.41	4155.33	3352.13	19675.1	1027.02	4351.78	5455.16	1297.17	1291.96	1282.94
M791T646			1.11881	0.414622	0.0108108	791.237	645.553	28381.9	23926.8	21548	8849.32	15968.1	13924.2	9828.62	9210.7	9443.87	3230.95	13996.3	975.333	5091.66	5084.69	4597.82
M600T260			1.11847	0.705426	0.444836	599.501	260.318	42978.9	49833.9	41982.8	199005	52731.2	50519.4	46931.9	94480.3	52610.6	26139	46787.3	41358.5	47894.3	47484.3	40009.6
M304T650			1.11771	0.649304	0.285359	304.051	650.023	24490.5	28591.8	46448.6	96810.5	90043.2	42417.5	20205.5	23395.9	20342.4	89638	41329.8	18580.8	51466.3	48840.7	48801.5
M111T285			1.11767	1.3094	0.104939	111.02	284.846	28532.8	16469.3	22877.1	17823.1	25063.5	31906	32282.4	21420	44660.4	26213.7	34859.1	27378.3	19590.8	19960	19589.4
M809T678			1.11685	1.35284	0.044924	808.938	677.608	10208.5	20637.7	17352.5	18250.8	21582.4	21210.3	26356.1	25216.9	23824.3	27108.4	14678.6	30602.7	32143.6	33375.2	32093.6
M142T383			1.11678	0.564112	0.230398	141.998	382.724	93620.9	137701	18677.5	46948.2	42166.2	17833.7	16924.8	61581.5	40446.6	26280.3	29549.9	26575.4	16982.5	16573.9	16570.4
M335T77			1.11614	1.25264	0.783075	335.183	76.974	91475.3	6461.61	103957	1454.09	1211.88	2527.32	91685.1	23944	136583	2569.4	2190.96	2433.01	38983	38772.2	6434.57
M431T619			1.11589	0.808903	0.191739	430.87	619.375	240900	292944	175855	137082	155708	170200	138338	168684	208228	133895	153510	145938	81845.6	81844.1	81232.9
M731T345			1.11513	1.5135	0.136492	730.592	345.473	15613.9	18946.7	16383	12579.5	16207.8	14820.9	26696.6	40880.1	13567.8	34528.7	15183.1	12248.4	35970.3	34998.6	35011.4
M298T78_2			1.11449	1.17778	0.313718	298.246	78.1705	19616.9	30964.4	22872.2	8328.39	33137.8	29406	27953.5	30981.2	24568.5	33544.7	24921	28015.6	23826.5	23836.5	25447.7
M308T71			1.113	1.35456	0.063864	308.267	70.524	17291.7	15916.3	16827.1	8236.97	12798.8	13678.4	16015.8	17415.4	22418.6	22890.4	11855.7	24202.5	15306.2	17153.4	17148.9
M149T180			1.1125	0.260809	0.132696	149.046	180.143	23220.6	6530.79	1359.41	44905.5	12828.8	2194.49	4749.43	4520.78	7130.11	3050.4	1177.44	3115.83	3014.61	3021.44	3135.27
M97T1254			1.11235	1.19176	0.514085	96.9596	1254.47	27536.8	15777.1	4535.19	46010.8	34018.3	21986	43937.6	22312.2	20402.5	21964	36040.1	33945.4	25186.9	24240.9	25503.5
M259T858			1.11234	0.830425	0.452068	259.022	857.521	129751	157707	128225	28244.2	107979	79620.8	92331.2	59005.7	140867	56821.7	103689	71720.8	47121.3	48522.8	48509.4
M111T53			1.11146	0.540692	0.0516629	110.975	53.355	39560	50593	27742.3	11551.8	23678.5	19046.7	18876.3	13367	18018.1	13669.5	18466	10695.2	12018.5	12227.6	12222.9
M494T48			1.11099	0.10226	0.00996841	494.456	48.124	15131.6	18798.2	33073.6	21836.9	6861.64	1433.08	1574.55	1424.77	1643.12	1456.41	2277.76	1556.45	792.262	1315.84	1333.11
M438T612			1.10939	0.732089	0.0341456	438.032	611.849	98391.6	115955	94650.1	70444.4	71291.4	67281.6	66898.2	74091	69761.7	62741.5	66043.4	39696.7	58192.4	57849.7	57844.5
M405T167			1.1077	0.358348	0.23031	405.138	166.636	8814.12	3724.89	6092.89	52721.8	16846.1	4583.89	4581.38	6224.51	4112.83	1860.02	7875.23	8594.88	2249.99	2330.38	2327.98
M808T145			1.10698	0.599689	0.502959	807.571	144.777	62990.9	76243.5	1.23036e+06	288817	225218	183252	258408	145494	121997	584914	14171	114501	225766	202384	225902
M393T46			1.10682	0.246018	0.0523622	393.1	46.485	22247.6	6654.4	4830.49	35956.2	15945.2	4905.21	1564.71	3357.81	1743.44	1858.46	7911	5838.79	2155.45	2032.75	2154.39
M501T66			1.10559	0.510409	0.0174244	501.339	66.1355	30975	33871.9	29285.1	13216	21950.2	17757.5	15285.9	14769.7	18441.3	6332.09	17340.8	2888.77	14295.1	14613.5	14621.9
M691T359			1.1055	1.7136	0.137892	690.561	359.272	10769.1	15110.9	10690.7	37095.8	26153.3	12581.3	21926.1	32629	59622.4	28740.8	8840.33	40852.3	37143.1	45506.7	45504.8
M926T695			1.10535	1.23539	0.441166	925.524	694.697	13074.7	51738.1	42733.1	80817.2	41929.6	62101.9	51381.8	87752.4	69643.4	21204.4	42594.3	88646.4	42512.6	39085.5	42636.8
M475T48			1.10518	0.183142	0.00591352	475.376	48.092	15317.2	25510.6	26297.9	27162.8	7801.7	4141.13	4410.57	1430.91	3738.31	3655.52	3763.41	2456.68	1519.12	1558.22	1487.75
M826T679			1.10362	1.84348	0.0131595	825.979	678.754	11806.1	21562.7	12829.4	21596.2	14190.9	17078.7	15955.5	39050.6	35022.6	18427.8	39604.7	34561.2	41486.2	36591.1	41518.2
M283T70			1.10171	0.768456	0.170311	283.243	70.129	143386	218245	216974	154826	208277	147629	160924	120190	213076	95394.5	190697	56825.8	118315	118930	120351
M375T67			1.10126	0.527674	0.00871602	375.229	67.1065	32125.5	24908.3	30142.5	26423	22922.2	17910.5	18162.8	6539.27	23698.2	8710.45	18845.3	5533.57	11755.1	12133.4	12150.8
M229T807			1.10126	0.91564	0.756731	229.011	806.726	47685.6	191351	86846.8	37801.8	88451.9	86346.4	77217.5	115860	91268.5	86319.3	58913.9	63477.3	58301.8	59304.7	59614.6
M476T161			1.10042	2.20812	0.180247	476.306	161.274	17003.4	10102.5	28802	12097.7	24008.1	38947.3	21823.7	108070	99891.6	16393.5	16057.9	26941.1	8443.33	8389.31	9095.25
M472T75_2			1.09862	0.0910282	0.16653	472.341	75.016	75205.2	38107.5	3144.26	2683.64	1938.43	1339.76	2002.6	2202.43	930.009	1355.84	2468.03	2184.64	1307.25	1307.01	1389.66
M404T764			1.09657	0.367414	0.0134358	404.104	763.702	11996.5	8872.37	11586.3	30191.2	17913.1	12259.3	7885.9	6279.46	7532.71	4695.86	4097.36	3611.63	7560.89	7561.64	7872.65
M701T828			1.09517	1.03957	0.755567	701.492	828.264	44983.4	71600.1	43288.4	54843.7	48361.3	53721.8	47158.9	58133.2	44112.7	54935.4	47542.6	77453	49816.9	47900.6	47914.9
M717T636			1.09513	1.06534	0.645364	717.466	635.862	236696	282630	219201	173679	219193	192285	224506	154895	268372	178956	332714	250728	216733	153205	216875
M186T1262			1.09411	0.894949	0.591705	186.104	1261.85	151135	127239	297016	265810	121149	161126	209840	169410	109397	226344	147020	143441	172052	172083	183075
M627T395			1.09405	1.3368	0.0635965	626.521	395.149	29062.2	25943.8	13878.5	21998.4	14049.8	14583.1	25966.5	31978.3	28496.5	26668.5	19299.9	27358.9	7869.34	8078.21	8041.7
M379T77_2			1.09387	0.331515	0.139067	379.203	77.136	48056.2	49460.1	8557.31	6040.64	8075.05	6800.21	6608.83	4958.34	5459.98	7019.7	12229.1	5822.94	5459.08	5126.21	5141.6
M288T700			1.09338	0.747578	0.0699585	288.079	699.946	80046	79445.9	62870.8	61007.1	64979.8	55406.2	65375.3	53954.4	64671.4	40389.8	58393.7	19054.4	38445.7	39995.8	40033
M719T290			1.09231	4.17778	0.079233	718.534	289.688	2944.13	2662.6	3278.78	2882.86	3620.41	4833.83	5555.14	2143.37	17710.8	12677	7362.09	39037.2	5842.26	5788.49	5788.01
M359T79			1.09219	0.931796	0.785183	359.221	78.67	50665.7	64603.4	148457	33266.5	86699.5	115698	87475.9	43085.7	64567.2	62350	107754	100096	46521.4	46870.3	46464.7
M455T404			1.0919	0.304859	0.0806646	455.331	404.358	55716.5	15027.4	28338.5	9118.2	11777	8731.78	4957.43	7662.78	10122.6	1485.86	12629.5	2380.01	2382.23	2439.21	2458.94
M306T540			1.0907	0.268537	0.068318	306.086	539.846	48259.1	9259.78	14974.8	23296.1	13005.5	2498.03	4867.92	3224.31	6140.33	1789.93	8982.23	4881.67	4089.75	5344.47	5332.84
M137T335			1.08963	1.27786	0.234828	136.616	334.898	31176.5	27939.1	20160.1	19414.8	17455.3	14969.5	41106	29148.2	21483.2	38263.2	17929.1	19617	24364.8	24223.1	27819.5
M813T210			1.08859	0.819619	0.811174	812.607	209.603	11390.2	12348.7	21190.4	40428.7	18122.6	298386	42021.1	27578.6	36326.9	133854	56120.6	33477.2	64817.3	80076	65128.4
M358T319			1.08792	0.270392	0.127873	358.227	318.691	9025.05	26938.9	4400.41	69147.4	13785.7	12689.1	3275.12	7822.31	7789.73	788.143	3773	13321.4	3352.52	3334.27	3352.36
M137T367			1.08671	1.21739	0.310192	136.891	366.753	10214.4	12308.1	30749.2	34893.7	33400.5	35357.2	37727.2	26892.1	25329.9	33773.7	38960.1	28353.1	36405.9	35540	36405.1
M278T324			1.08614	1.91178	0.110489	278.036	323.937	7174.53	11106.6	8266.68	1757.24	8154.95	14468.7	11112.7	8120.32	20761.3	8428.94	14799.7	34141.5	8472.64	8576.12	9850.45
M497T80			1.08594	0.36094	0.172751	497.286	79.9045	47747.9	52449.9	9561.61	3311.33	7109.59	7052.16	10120	5724.27	8762.15	8438.16	8054.87	4823.91	6828.52	6980.54	6976.25
M126T248			1.08593	0.663358	0.413273	126.001	247.585	131508	40657.7	34239.2	18953.3	23637.9	26229	33145.3	38949.3	47670.7	15919.2	27338.2	19549.9	8644.92	11887	11307.1
M253T276			1.08532	1.3732	0.133484	253.019	275.529	2351.77	11335.1	21174.2	21765	27599.9	24132.4	28369.5	22964.3	24740.4	28656.1	25303	18764.6	30544.5	33636.9	33598.1
M177T74			1.08407	0.268168	0.0342489	177.491	73.875	17909.8	7713.8	7117.01	32242.1	19423.9	4169.83	4623.22	2370.57	2770.18	1032.27	6749.55	6207.58	3656.91	3479.37	3656.3
M340T692			1.08351	0.799594	0.029199	340.046	691.771	201468	182360	133252	197190	156180	189010	122703	130079	167463	127149	169608	130136	96532.2	95913	96530.7
M406T740			1.08333	0.571195	0.00917783	406.131	740.304	38103.2	32959.7	25925.7	22027.9	25567.8	21775.4	18827.7	16216.8	21336.3	11104.6	21766.4	5772.08	12263.7	12264.6	12324.7
M876T646			1.08325	1.48949	0.205891	876.218	645.818	3195.3	6854.98	27188.9	29730.7	7618.74	9792.56	16722	28885.8	18357.7	23112.9	15336.1	23270.2	17446.2	17198.2	17102.3
M204T319			1.08261	0.353199	0.127669	204.066	319.455	24399.1	6643.59	2747.85	40609.4	16636.9	4652.12	5038.04	3589.88	13904.1	2529.5	5501.29	3234.41	2045.28	2044.76	2082.15
M605T49			1.08255	1.47429	0.253078	605.476	48.6115	20994.3	27917	7045.84	6785.39	10031.5	11105.5	14353.4	17827	8999.88	28870.3	16735.3	36876.9	16396.2	16395.1	16118.6
M732T47_1			1.08178	0.12554	0.0176019	731.598	47.361	10683.5	24737.8	25320.2	35080.2	6051.62	1792.4	3421.25	1777.28	1214.8	2939.46	2044.53	1616.91	1717.27	1717.81	1691.66
M464T398			1.08053	0.614218	0.189149	464.312	397.983	51954	37246.9	38491	20999.2	60957.7	29874.9	10190.3	2631.85	42787.2	4533.43	57473.1	29503.9	7057.46	6958.29	7061.07
M244T53			1.08018	1.17271	0.44731	244.19	53.283	38802.1	46755.6	31592	48925	45149.5	36172.8	31219.4	50418.4	37897.5	88827.5	45637	36125	47961.3	47317.7	47324.4
M552T273			1.07863	1.34426	0.2465	552.271	272.682	16789.3	10252.8	36512.9	6026.47	21293.9	25722.2	29170.1	21537.2	34785.9	32674	14894.5	23675.6	19589.4	20568.4	19606.3
M740T303			1.07845	1.28517	0.426742	739.535	303.303	5980.37	5810.48	30579.1	22708.4	15680.9	24913.2	17360.1	28564.4	22227.4	23485.2	6079.14	38090.8	21602.9	20933.1	20642.6
M1056T682_1			1.07801	0.641687	0.22434	1056.02	682.165	33036.8	134638	68300.3	42203	42071.7	48946.9	43010.8	51792.8	63950.6	18275.1	39564.7	20314.6	7063.64	7499.99	7501.23
M449T49_2			1.07787	0.211916	0.0289816	449.361	48.735	44259.8	22782.5	19012.5	20575.9	6582.85	3233.6	7623.44	4310.52	5188.72	1073.6	2787.51	3693.28	2628.05	3376.77	3404.34
M487T482			1.07766	0.617296	0.399896	487.178	482.149	85433.1	59830.4	21091	22928.3	43229.7	1033.23	42796.7	3118.59	6650.18	1036.71	72293.2	18271.4	17784.1	16894.8	16296
M419T70			1.07733	0.570602	0.00397353	419.255	69.677	22875.5	23149.3	23407.7	32208.9	28633.5	27922.4	23315.3	6265.39	19315.4	10327	18557.2	12487.6	10571.4	8985.82	10540.4
M149T250			1.07599	0.287296	0.251076	149.027	250.117	83111	5690.51	11420.8	17856.9	9205.06	1787.97	6652.12	4365.23	12249.9	3455.12	5862.02	4497.53	3588.21	3737.76	3737.9
M1011T785			1.07557	0.729796	0.160054	1011.27	784.737	53495.9	87857.4	61394	39738.3	59375.2	46705.4	56271.9	46158.9	65941.3	28115.6	44701.7	13192.8	27780.8	27775.9	27417.4
M480T55			1.07552	0.315359	0.00627159	480.437	55.2375	16689.1	24123.1	30311.2	22893.5	11426.5	6626.01	6573.63	5934.45	10043.1	3803.02	5655.91	3331.98	5305.91	5304.42	4946.12
M578T309			1.07447	0.568379	0.112672	578.3	308.595	47473.8	56464.1	25881.9	4607.47	27333.7	33838.2	17289.7	13254.9	29228	10337.8	27478.2	13585.9	10578.2	10580.7	10428.2
M227T305			1.07381	4.30329	0.0439946	227.013	304.646	774.333	5179.03	4569.13	1779.81	2328.42	922.892	963.275	4412.03	9396.94	25246.4	17674.1	9239.08	9712.92	12718.2	12708.4
M765T620			1.07361	1.19969	0.17867	764.736	620.429	29344.8	35161.8	65232.2	51303.2	60350.8	63150	59057.3	62780.9	75025.8	54896.3	61265.6	52331.9	35345.6	35363.8	27298.5
M213T259			1.07361	0.973472	0.943389	213.016	258.908	11534.8	20093.8	27687	79251.7	25432.5	18738.2	26889.2	21448.1	22333.6	42062.2	18845	46312.1	10637.1	9261.3	14041.5
M592T682			1.07342	0.54329	0.0188501	592.488	682.156	28090	40196.5	30443.7	21094.6	23580.7	14652.5	17957.4	14684.7	20247	9465.1	18306.4	5210.85	6765.28	5121.63	6790.62
M686T302			1.07286	1.12447	0.588912	685.528	302.14	7317.69	39734.2	58239.9	59006.6	58199.1	47641.8	39351.8	67902	50511.7	64302.7	51296	30399.5	50481.4	51837	51841
M588T682			1.07226	0.594057	0.0182855	587.966	682.132	41831.3	39023.2	28588.4	24610.8	25309	22386	23956.6	17186.9	22266.9	11859.4	24794.5	7904.84	10980.4	5993.8	10966.1
M121T155			1.07161	0.323143	0.214875	121.029	155.268	20887.5	11023.2	89483.4	7198.08	10733.3	13094.4	7105.58	8266.37	10978.4	8129.08	10177.1	4596.93	8357.89	8819.98	8831.9
M833T299_1			1.0711	0.912762	0.540392	832.583	299.153	408090	400759	285820	263870	394315	245236	330251	328336	428531	177178	291363	268123	251688	253051	251699
M670T682			1.07087	0.563991	0.0210195	669.969	681.595	40656.3	34280	30956.4	18576.5	31331.1	16263.7	19667.3	20247.7	20610.7	10130.1	19560.3	6826.42	10916.1	10678.7	10914.4
M851T640			1.07073	1.66664	0.234174	850.523	639.687	5184.07	8385.06	8867.46	17906.3	9885.85	16360.9	9072.16	12498.9	27399.4	11080.3	8951.31	41978.8	8864.77	9724.7	9742.52
M602T386			1.07064	0.537658	0.111592	602.346	385.779	12091.3	8402.57	40004.7	19760.2	28309.4	35683.4	8097.46	6822.03	23027.5	5133.51	25681.9	8795.68	5453.27	5398.46	5950.49
M1173T636			1.07	1.29833	0.0696609	1172.98	636.379	12096.4	12562.4	20827.6	19181.2	19168.6	8294.72	21314	20654.8	18775.2	19325.7	16533.1	23013.7	15116.2	17292.5	17458.7
M200T1365			1.06963	1.11113	0.522932	200.119	1364.97	36516.8	36404.5	38061.9	39072.8	39401.5	38971.5	52410.6	22930.7	34488.2	66753.6	33461.7	43770.4	39281.4	39274.4	40958.1
M157T525			1.06959	0.778423	0.652143	156.991	525.205	32997.2	913968	241199	259821	179901	210697	53085.6	461024	422772	176904	34642	282769	10376	10535.1	12032.4
M226T54			1.06907	1.16387	0.5277	226.179	53.5525	56595.7	57740.4	35266.9	57283.3	49506.2	32663.4	33032.9	65938.9	43013.4	105092	55891.4	33453.3	57523.6	57585.9	58921
M431T784			1.06858	0.397445	0.0420138	431.118	784.171	29287.3	43654.2	20938	10002	15238.5	10646.3	12997.6	7284.08	13113.7	5056.25	10737.5	2385.82	5055.66	4974.15	4981.95
M194T66			1.06831	1.04259	0.893723	193.994	65.7865	47391.7	83836.4	29359.1	5160.2	18960.8	38996.9	35490.2	50709.8	43753.6	41326.3	34154.7	27799.1	21316.1	21333.6	22229.3
M567T54			1.06618	0.448175	0.0570589	566.549	53.548	22684.2	27848.4	26377.4	63644.5	19033	16607.3	21779.4	12207.7	9781.23	9023.69	20156.7	6017.33	15337.5	15682	15336.7
M509T220			1.06464	0.89368	0.789525	509.286	220.47	5515.51	4176.59	199445	206188	129145	102736	90438.7	183878	120948	51107.6	82423.4	49599.9	54519	27492.7	54772.6
M602T326			1.06418	0.596737	0.255505	602.3	325.777	8954.73	19940.9	89222.1	64517.7	107203	42618	51916.1	45436.7	12330.2	6398.39	63807	18500.8	36829.7	37326.6	37320.6
M867T60			1.06412	1.1081	0.780815	866.505	59.903	134665	32153.6	49802.8	46950	14796.4	53744	11192.9	53216.4	99522.2	52867.3	80516.5	70697.4	50572.4	48353.9	48357.2
M128T546_2			1.06411	0.96476	0.82321	128.035	545.642	106408	180646	144262	106725	101000	108159	99035.3	118059	186429	87499.8	117515	112330	52380	52753.5	56108.3
M431T811			1.06309	0.486102	0.325242	430.988	811.146	69140.3	61599.2	3728.66	71537.7	945.191	3671.86	1704.97	1315.97	55356	38079.4	1386.95	4540.92	28667.6	36562.2	36547.3
M858T347			1.06199	1.35938	0.230753	857.517	347.029	15189	7543.87	14150.6	18715.4	12617.4	18921.5	9821.98	18040.8	11253	24512.5	20405.9	34418.9	21894	21886.1	21250.4
M904T360			1.06113	0.471134	0.0206854	903.693	360.361	16897.8	46957.1	41295.9	33465.7	20241.5	17022.1	11266.8	18576.5	15177.2	13236.3	17867	6739.33	17958.4	15400.7	18177.4
M505T675			1.06102	2.23768	0.0852755	505.113	675.238	6305.61	4254	4291.26	9745.3	7417.14	2886.41	21548.1	12248.9	5617.15	4150.78	8546.67	25982.8	3593.55	3803.8	3804.88
M364T479			1.06082	0.58314	0.369307	364.28	479.299	56366	45357.6	30430.2	1569.98	15445.8	9815.06	8235.09	936.513	40964.7	2082.62	39190.4	1300.87	3332.21	3373.88	3553.17
M638T348			1.05979	1.52216	0.232226	638.42	347.537	12499.9	7544.16	3426.53	9079.14	23732.3	18545	13315.1	20402.3	12084.6	22424.5	9016.58	36655.5	12566.8	11677	11686.5
M269T434			1.05957	0.216985	0.130279	269.066	433.875	6989.69	4153.94	2774.21	37091	16735	2474.94	1733.8	2549.43	5727.57	1264.41	2152.65	1808.54	1104.56	871.647	1098.92
M717T230			1.05947	2.57878	0.00533478	716.522	229.587	1268.71	946.269	6010.82	7052.88	4153.52	4001.55	4790.86	14315.3	11124.8	7493.73	9966.92	12738.9	10283.5	9254.56	9255.97
M248T839			1.05868	2.11379	0.136622	248.065	838.849	3970.4	5508.57	5607.36	8239.02	6312.02	8814.57	8640.21	11803.1	5887.4	15579.7	5512.59	33856.4	10850	11607.5	11582.6
M308T548			1.05776	0.693001	0.510021	308.098	547.59	22338.3	17984.9	12376.4	90087.7	12497.9	21038.4	12166.4	22103.4	21546	15147	8741.65	42487.9	7410.53	7682.39	7684.08
M237T50_1			1.05748	0.238276	0.00295705	237.184	49.872	18878.1	22322.1	28644.2	17043.5	11328.9	5359.37	3971.64	5508.23	2611.99	3056.94	4857.69	4673.22	2787.79	2568.48	2155.26
M357T877			1.05659	1.08261	0.633106	356.997	877.495	41203.3	41180.7	43766.4	9851.48	35288	34150.9	39296.7	27269.5	47016.9	34602.6	37746.8	36479.3	27154.3	27154.1	27072
M550T324			1.05609	0.508648	0.274558	550.349	324.418	92199.2	51516	14729.3	10094.4	11405.4	14761.9	25514.1	21907.8	18521.1	10547.4	11171.5	11375	6711.83	6620.68	6710.8
M123T364			1.05586	0.760511	0.218791	122.975	364.156	112941	130528	108594	63915.5	128111	62457.5	103215	75895.4	121624	51083.4	79250.9	30216	53136.2	53261.2	55256
M352T74			1.05574	0.144322	0.0651562	352.182	73.586	41313.6	2510.54	48827.5	3241.4	2319.23	58712.8	2342.06	2874.31	3871.05	9807	2086.38	1667.01	12371.9	7575.66	12032
M291T450			1.05453	0.0920624	0.293643	291.112	450.394	3464.06	4602.89	2072.1	83981.9	1535.62	3292.77	1156.62	2091.32	2851.04	1199.19	1022.33	789.014	790.431	790.379	804.501
M528T79			1.05352	0.298134	0.21685	528.271	79.4665	81240.3	28494.4	5794.74	10199.2	5793.22	6137.65	6519.35	5612.66	5654.67	8435.57	5327.2	9491.54	4196.85	4112.29	4113.25
M200T373			1.05276	1.20606	0.338431	200.119	372.57	35503.3	10937.8	36865.6	29932.3	18752.9	31315.6	43600.9	30187.4	29622.8	40785	18279.5	34482.3	47876.1	54708.6	48208.5
M468T405			1.05251	0.38729	0.0396159	468.343	404.545	5435.73	12913	30484.1	25214.2	18686.9	11958.3	4030.82	350.868	8992.93	244.133	13000.9	13926.7	6114.43	8015.74	7953.5
M796T202			1.05165	0.765777	0.669395	795.606	201.703	6033.71	9027.55	44865.7	46551.1	57048.8	184729	43554.6	34718.2	117216	19063.7	41628.4	10506.1	68418.3	88506.8	68595.3
M353T304			1.05131	0.620979	0.365349	353.232	304.459	25423.6	8917.39	23898.3	3341.34	26735.9	76300.9	15567.7	12699.3	21941.6	10147.7	12084.9	29782.7	13920.6	13460.5	10427.9
M321T628			1.05067	0.366438	0.13221	321.016	627.512	43418.8	32681	12229.5	3888.3	10433.7	3720.51	9578.3	7131.79	6542.68	5158.11	9709.47	858.282	2977.76	3246.34	3248.34
M611T69			1.05033	0.605451	0.0123578	610.526	69.1345	31350	30142.7	31855.9	46512.3	30425.7	28443.7	19429.6	26677.6	25680.9	16444.7	26276.5	5812.19	33512.9	33511.6	34086.4
M428T330			1.04987	1.30152	0.59759	428.372	330.154	58793	197429	101206	21900	112060	75233.4	121237	108538	344449	74042.8	48904.2	40298.7	78978.4	87241.3	78938.8
M360T75_2			1.0497	1.48209	0.0352549	360.255	74.618	19168.3	23869.4	18424.4	6831.74	20677.4	22000.5	25179.9	29002	39798.3	20795.5	23717	25977.7	17169.5	15414.4	17160
M258T872			1.04933	0.949765	0.831716	258.11	872.031	303637	570384	443543	444546	635248	349704	591533	654535	638686	335712	276847	111750	294769	293916	260227
M280T94			1.04898	0.992137	0.980716	280.236	93.513	42184	93778.3	33453.1	19210.2	29383.8	26763.1	21657.8	44108.4	36527.1	53358.8	23583.4	63612.4	28254.1	28301.3	30683.3
M310T70			1.04866	1.66593	0.069817	310.282	70.18	10320	7860.35	9485.99	8231.86	5479.89	7956.98	9601.05	12781	11028.5	20505.2	5978.67	22294.2	9526.87	9523.07	10328.8
M453T512			1.04814	0.290992	0.420495	453.188	512.192	2990.81	302.91	1204.34	606.491	5260.24	64598.9	3685.57	973.703	10439.3	1689	1797.78	3228.54	736.628	774.837	743.1
M770T711			1.04769	0.570922	0.0202766	770.3	710.907	40546.8	33317.3	35947.1	20824.8	20557.5	26320.1	19895.4	24155	21677	12595.3	19639.7	3384.14	13903.6	13903	14058.6
M166T362			1.04736	0.753203	0.126516	166.018	362.308	86728.1	105918	78919.8	116099	102527	53079.2	87143.2	61506.2	105671	48852.9	62016.7	44002.7	45346	45332.6	46676.9
M775T295_1			1.04474	1.20605	0.400988	774.542	294.781	22236.3	26807.6	36602.8	26779.3	21704.8	33254.4	22153	34432.2	25099.6	28158.6	29145.8	62885.4	25372	24848.2	24876.2
M215T365			1.04419	0.181826	0.0322363	215.032	365.259	13589.1	5078.15	6335.67	26790.4	11882.3	2444.99	2761	689.024	2557.62	1270.68	3876.66	867.447	1447.58	1598.65	1448.39
M1048T690			1.0438	1.00125	0.996333	1048.03	690.355	12718.3	40374.9	45693.7	45058.8	68710.6	76874	54227.5	61801.1	14476.4	74846	33132.7	51307.3	41427.6	37731.4	37584.8
M554T334			1.04355	0.201961	0.0956266	554.344	333.839	46348.4	15135.9	8098.28	4938.12	7876.08	7029.26	4103.64	3515.09	4712.82	2017.97	1845.73	1865.3	4569.98	4762.84	5516.79
M147T180			1.04311	0.54165	0.324159	147.029	180.031	20223	25785.5	37370.3	95201.7	15324.1	5681.74	30180	15457	6523.5	5823.85	5201.43	44920.3	6363.6	6369.11	6536.27
M256T710			1.0423	0.716212	0.0414215	256.095	710.347	83264.3	114955	82158.9	65176.7	86269.4	71570	82813.1	73853.2	61579.3	57641.6	54320.4	30329.7	58741	59836.2	59829.9
M221T48			1.0417	0.128775	0.00553344	221.189	47.8445	12508.1	20459.6	24408.9	19645.7	7069.28	1956.05	2584.19	1275.55	2264.6	1744.6	1862.07	1349.77	1312.6	1090.88	1313.68
M466T317			1.04123	0.463336	0.0787604	466.319	316.766	21599.5	52073.7	18654.3	13032.6	17914.8	12953.8	11553.2	10346.6	13485.5	7175.55	15252.1	5306.75	7813.09	8457.89	7824.37
M867T300_1			1.04024	2.37326	0.0271873	866.588	299.788	4484.65	7007.83	11525.4	11046.2	20210.8	15593.7	10714.6	43333.8	42245.3	12450.5	30492.1	26580.3	17235.1	24872.8	17929.7
M240T61			1.03908	0.402524	0.025388	239.999	60.557	18136.8	17039.4	10245.5	34844.2	17093.7	7914.57	8476.71	9175.66	10129.6	4747.2	3911.69	5934.59	3826.28	3818.97	3994.26
M301T815			1.03897	0.698598	0.213896	301.032	815.493	59022.1	40155.4	104143	36545.4	129963	79210.3	66429.6	48796.7	58566.6	68840.4	54775.5	16289.2	56013.5	59328.8	59151.8
M455T664			1.03864	0.826335	0.340214	455.012	664.006	71026.7	136851	102315	177746	144253	69172.2	130517	102511	63778.9	114289	83232	85233.5	90681.6	82553.2	73227.6
M758T700			1.03862	0.708862	0.0747502	758.114	700.23	71091.6	97593.4	54104	43434.8	54275.3	50554.7	46080.7	48987.2	55418.7	41662.2	45432.5	25444.7	31321.5	30328.3	31314.3
M283T900			1.03832	0.574318	0.0661693	283.018	900.408	41587.3	50909.7	34832.1	8992.86	33152.3	23527.1	20509.9	13544.4	28784.9	11456.3	24562.6	11985.9	9512.85	9700.32	9700.2
M226T775			1.0382	1.07401	0.663124	226.083	774.792	81961.9	78377.8	169940	137754	151888	150023	185747	142562	116535	152439	145638	84010.4	170265	192924	193037
M278T284			1.03771	1.08412	0.52513	278.15	284.439	53005.2	36293	43428.3	27602.9	41682.2	49641.6	40238.7	34860.1	48693.1	37751.1	59041.8	52237.1	33913.4	35511.7	33929.5
M308T129			1.0373	2.62541	0.0536167	308.171	129.451	2386.91	2654.22	4158.63	3276.72	5667.59	12058.5	9410.62	10473.4	4630.19	11647.8	13949.1	29182.9	6828.44	8722.25	8667.33
M569T623			1.0361	1.07109	0.547516	568.782	622.94	38174.3	92881.2	77009.2	60252.9	72042.9	77492.2	77644.1	74452.5	83319.5	71473	73921.9	66746.9	51500.1	51549.3	43685.1
M550T380			1.03598	0.661905	0.248253	550.385	379.845	19912.1	5381.46	42502.1	26052.4	42162.1	40834.7	11954.8	9296.92	37963.1	6384.1	32315.6	19139.9	17327.7	12602.7	12840.6
M201T414			1.03433	0.420814	0.115711	201.038	414.419	12346	52428.9	11948.8	42112.7	15292.8	6488.92	10691.1	7562.84	14878.4	4736.74	12464.1	8840.82	4091.62	4218.34	4882.47
M416T634			1.03428	0.679909	0.259374	416.051	633.534	112914	74114.6	43826.3	25441.1	37398.9	36411.4	38566.4	17456.1	56562.8	24562.3	51538.1	35756.5	24663.7	17117	25084.3
M484T665			1.03303	0.765343	0.249074	484.039	664.81	141367	93925.5	92997.6	31847	58970.4	76209.6	54540.6	68328.8	77382.4	52430.9	74000.7	52404.1	24586.9	26115.7	26032.7
M521T376			1.03283	0.847712	0.75331	521.343	375.562	111100	67483.7	7013.76	6286.57	23658.2	12131.1	39464.2	42859.4	23257.6	37070.7	15776.2	34573.5	27717.7	26822.8	26824.6
M789T82			1.03155	1.44112	0.164858	788.523	82.346	21675.7	12561.4	9522.96	13639.9	5539.75	10787	7188.42	15089.3	14704.5	24744	18422.3	26100.1	16108.8	15488.8	15499.4
M1142T689			1.0307	1.45613	0.221137	1142.01	688.564	36876.5	37336.9	27452.4	72167.5	56445.8	20144.4	69351.9	31144.6	87801.2	92365.5	65907	18078.6	43986.8	51520	51601.5
M118T535			1.03061	2.01864	0.506977	118.121	534.817	2840.67	2584	3266.33	26498.9	1125.41	1711.63	519.918	179.244	1021.49	20323.4	2662.03	52056.7	1208.74	1207.27	1397.89
M227T335			1.02952	0.247516	0.182259	227.124	334.579	31781	5728.73	2568.72	66894.6	12265.9	1696.06	1716.74	3220.57	14751.2	2246.67	3864.49	4133.64	1160.13	869.544	1149.8
M317T79			1.0291	1.19237	0.829971	317.176	78.6545	5556.35	95628.1	6374.45	39548.3	125934	6792.71	3935.46	121721	1879.81	199395	4376.14	2356.62	3190.95	3190.05	2740.98
M525T316			1.02903	0.491055	0.161268	525.28	315.546	51680.1	48860.7	15642.7	5824.3	15237.3	11356.7	12234.1	7833.06	17956	10302.3	14485.6	10160.7	9587.11	9586.66	9460.03
M459T49_2			1.02869	0.176727	0.00519215	459.417	49.2925	15337.8	21498.5	24597.6	19779.2	6070.91	3592.81	3474.4	2687.34	2301.98	2192.29	3076.32	2328.06	2116.91	2083.38	1696.62
M691T334			1.02844	1.48173	0.152077	691.463	334.456	8695.57	5030.28	28573	18229.4	17413.7	27094.8	26934.6	27330.1	34046.1	20237.9	10763.1	36324.1	10003.7	10012.4	10471.7
M551T718			1.02772	1.51613	0.132297	550.949	718.092	9366.62	10097.2	6377.91	11559.9	25358.1	25885.8	28718.5	13551.1	12558.1	28723.6	23331.3	27515.8	28048.1	28752.4	28898.2
M791T83			1.02742	1.34447	0.101219	790.538	83.227	6746.32	15830.9	14696	21228.4	9869.41	19417.3	11691.9	20721.1	20543	20412.8	23021.7	21638.3	23020.5	16144.7	23183.8
M233T404			1.02691	0.328604	0.151567	233.091	404.264	27600.7	9624.72	4900.41	59069.7	20768.7	2670.71	3465.96	4360.61	19034.9	1379.97	4489.27	8224.8	378.433	379.37	352.472
M277T61			1.0268	0.406485	0.119568	277.037	61.471	27964.2	12170.8	4686.07	42051.2	16087.2	4931.24	4848.66	8978.49	16454.7	4347.38	4260.07	4966.66	2896.45	2554.15	2576.25
M796T46			1.02617	0.360886	0.0588432	795.527	46.034	27807.5	7483.41	13327.4	35124.7	4864.53	14999.7	1877.47	10555	4414.63	5176.68	13046.9	2319.8	18942.6	18703.1	17451.7
M477T49			1.02394	0.158271	0.00978341	477.43	48.734	16144.3	24968.3	27734.6	24362.5	6883.69	1080.82	3551.97	2966.76	1043.42	3882.87	1223.77	3344.19	1236.6	983.711	997.693
M473T713			1.02394	1.30831	0.466778	472.996	713.413	21143.2	13421.6	11440.9	17246.3	54400.2	16402	16935	24701	20657.3	58085.2	19935.7	35070.1	17170.7	17186.1	15788.9
M359T75			1.02347	0.531865	0.0536607	359.221	74.633	60626.6	52260.2	27151.1	11243.2	51587.4	24942.1	22674.5	25079	19769.8	17153.6	22214.8	14272.8	15603.3	15068.1	15523
M596T327			1.02343	1.55888	0.381529	596.333	326.514	3569.17	1520.36	125202	54434.3	70404.8	71356.2	202626	82087.7	111071	49780.4	50764.9	12625	42697.2	42845.1	42844.6
M755T311			1.02294	1.47693	0.248485	755.494	311.173	20205.4	23085.1	14434.9	11937.3	1796.96	23791.1	30716.6	31065.3	17382	13184.5	7703.22	40626.6	7297.16	9856.27	9849.19
M328T49			1.02244	2.0358	0.210817	328.257	49.274	9108.95	4736.51	6996.75	5459.34	36585.1	30920.1	1868.82	2554.55	42277.9	26056.5	60413.1	57801	17476.6	17479.6	5249.41
M333T232			1.02236	0.825331	0.673775	333.206	231.82	49862.3	31808.5	28943.4	8992.28	38011.1	133481	30210.3	17385.5	53118.5	27145.6	41469.4	70923.2	14440.7	15393.1	15383.6
M455T392			1.02227	0.518081	0.354975	455.295	391.871	91958.9	44224.7	9653.75	7617.8	13760.1	7182.91	33852.5	13172.1	10190.6	18701.2	8890.35	5545.62	35727.6	37616.8	35765
M410T498_2			1.02156	0.463594	0.226296	410.097	497.561	57872.5	23445	14805.9	3397.31	15392.3	8221.09	10440	3615.7	20950.8	3450.74	15493.2	3133.71	4556.96	4553.81	4758.91
M333T120			1.02155	0.483381	0.222003	333.206	119.898	66862.9	10420.9	18872.2	5881.78	13824	67670.4	11444.8	9321.86	29830.6	10430.8	12671.4	15016.6	6764.35	6607.74	6361.94
M442T711			1.02143	0.630971	0.0735525	442.123	710.901	39044.8	54642.5	31759.9	21437.2	34097.7	27285.4	31335.3	24882.8	32333.9	13986.6	24309.7	4562.39	17161.2	17976.6	17163.3
M691T870			1.02114	0.749266	0.0197293	691.121	870.252	72830.6	99533	77928.7	74496.5	79948.9	71501.1	68429.1	71778.8	67527.9	51486.3	63317.6	34289.9	56683.4	56771.5	57206.7
M117T457			1.02096	0.703038	0.605278	117.101	456.923	162803	3937.16	55635.7	7930.84	30585.5	38140.9	95835.9	1260.97	43727.9	4907.32	38515.3	25983.8	27740.7	29066.7	27761.6
M1179T641			1.01926	1.48527	0.293339	1178.54	640.69	9086.8	6396.86	17335.7	8155.82	5417.09	20015.5	16350.7	10458.1	10795.2	17484.3	7765.7	35779.6	9445.91	10711	10718.8
M755T306			1.01925	1.23173	0.215061	754.536	306.43	40013.8	42391.7	32468.7	32878.6	37457.2	36861.1	35480.8	41591.9	60355.7	28737.6	38979.9	68385	31512.9	32706.5	32707.5
M347T645			1.01896	0.622834	0.0883377	347.032	644.83	45231.4	49343.2	34058.6	14382.5	31576.3	24423.5	29333.6	20461.7	26378.7	10010.2	30054.4	7715.18	18179.6	17759.6	17759.4
M355T67_1			1.0186	0.165176	0.0361842	355.007	67.113	6059.68	18082.7	8674.66	27265.2	6387.88	1498.72	2635.52	1431.51	2404.63	965.927	2782.06	1007.13	1965.72	1808.58	1815.44
M580T684			1.01834	0.637813	0.247382	580	683.885	56915	64759	19837.2	41640.3	14116.2	40360.3	26953.2	18178	63497.1	9820.48	26742	6371.5	8886.25	19323.9	19370.7
M290T71_3			1.01784	0.288266	0.277063	290.104	70.784	5617.35	3830.71	1953.21	44735.1	9313.81	1198.55	4187.46	1610.4	5995.19	1560.66	1251.63	4607.26	980.2	856.6	805.428
M730T349			1.01765	1.01872	0.958565	729.588	349.048	57801.7	73350.9	66054.3	20865.6	73256.5	19898.1	38334.9	62891.5	24490.6	54688.1	17166.4	119483	64187	72620.1	64119.5
M316T63			1.01647	0.396951	0.451442	316.046	62.89	1078.94	12265.3	664.533	57847	821.141	231.577	5750.2	6067.27	2393.44	5878.05	3795.32	5056.85	1505.74	897.346	1034.14
M255T49			1.01619	0.211249	0.010578	255.194	48.652	16830	17952.4	32238.5	20024.8	7368.21	3825.6	2513.7	3096.99	3470.22	4228.89	4297.92	3145.27	2583.6	1972.12	2555.45
M504T332			1.01594	0.389176	0.107586	504.307	331.822	46042.1	39842.5	8318.79	5605.4	15133.5	10504.1	7542.07	7520.74	12754.2	5185.36	5581.65	10236.8	7344.65	7572.21	7572.28
M249T42_1			1.0159	0.903399	0.824764	249.007	41.691	76482.7	40363.5	21074.6	81038.3	41403.1	13700.7	105350	25795.8	71143	5779.35	17767.4	21752.8	38758.2	38517.6	23526.5
M317T75			1.01524	0.854113	0.617666	317.211	75.217	214213	148999	327750	91810.5	294695	542380	252735	195223	408243	118476	220313	188542	122215	127824	127784
M572T355			1.01471	0.482354	0.122947	572.364	355.286	75874	114221	20515.6	37742.3	58070.5	12711.5	38631.3	27013.3	13227.3	42872.1	15406.5	16785.9	37951	37897.4	36524
M193T94			1.0146	1.13946	0.55969	193.398	93.64	36458.4	23721.7	59752.3	28040.2	52742.6	21022.9	36825.1	36116.7	59598.9	58096.2	26569.4	35454.4	21658.7	21334.9	21660.2
M447T50_2			1.01414	0.316988	0.00108793	447.381	49.844	20961.5	25878.9	27403.6	18392.5	11621	10924.8	3937.21	6914.92	5996.49	7433.59	5020.87	7208.26	3799.67	3152.33	3800.62
M814T79_2			1.01403	1.09731	0.610993	813.613	79.213	33651.4	32232.8	28544.3	25034.5	37609.2	59903.5	28156.3	38938.2	42185.9	40161.1	30266.5	58381.3	31459.4	30026.4	31451.1
M159T571			1.01374	1.18561	0.540007	158.971	571.356	16499.2	15445.6	46246.3	10974	41093.2	12222.5	21479.6	35132	23688.9	36638.9	22208	29778.8	26753.2	28604.3	28519.7
M719T47			1.01355	0.211614	0.00859082	718.597	47.032	14212	20399.9	25442.9	27990.4	7305.25	4087.86	6057.72	2405.27	3108.87	2782.06	2166.48	4522.09	1826.37	1826.36	1824.5
M125T302			1.01351	0.809436	0.429647	124.991	302.105	41188.8	80815	73609.7	120678	130526	47645.5	107261	31449.8	76133.7	41579.4	87587.7	56224	39018.2	32288.8	39377.3
M973T678			1.01239	1.44623	0.0145677	972.945	677.608	9717.56	19083.3	12184.8	15382.8	15143.5	15876.5	24430.8	19527.5	18409.6	28165.5	19056.3	16793.7	34040.5	34069.9	27679.7
M961T670			1.01213	1.15803	0.663555	961.048	670.336	31169	68872.3	28745.1	28179.3	22555.4	27631.5	26851.4	89507.2	30754.3	33644.1	26218.7	32913.1	21039.2	34749.1	27584.2
M335T919			1.01128	0.538592	0.0283316	335.073	919.2	18031.1	45765.9	37160.7	43065.1	32132.2	31031.2	28363.7	34329.1	22736.2	8404.78	11350.7	6404.44	17653.9	16343.1	17658.8
M335T829			1.00986	1.02383	0.889805	334.879	828.547	49145.1	57602.4	57849.9	25803.1	77584.3	61034.4	38181.5	40621.2	77649.2	63137.5	58728	58541.1	51883.9	58636.9	58633.8
M334T870_1			1.0097	0.600856	0.0183431	334.011	869.699	44838.1	49397.4	35122.9	24841.3	30621.6	31434.2	28532.1	31586	23723.7	18645.8	19484.1	7966.6	19887.9	19878	20614.5
M246T1076			1.00961	1.04341	0.876051	246.181	1076.08	93729	120861	53370.7	43870.8	49744.9	52633.5	54667.4	61703	103432	64767.8	27703	119916	26858.9	26713.2	13667.4
M338T632			1.00955	1.35452	0.224658	338.076	632.319	15557.9	37375.7	22928.1	21942.6	15512.5	15855.5	26690.4	52239.9	28438	25142.2	19703.2	22752.4	11625.1	11727.9	11604.5
M227T679			1.00942	1.1206	0.624887	226.987	678.578	18633.2	72603.4	35948	93186.4	77654.4	96032.8	49769.5	79864.6	75009.4	48118.8	106775	82045.6	95139	103463	95193.4
M735T45			1.00931	0.365748	0.0149576	734.614	44.945	27349.5	34528.5	20391.2	32818	10140.6	8413.81	13033.2	8451.69	4008.02	5275.5	11785.1	6325.59	15226.1	15226.7	15101.4
M331T705			1.00836	0.725264	0.257518	331.043	705.13	95555.3	231791	108502	91726.1	89903.1	83920.6	113053	122352	88375.7	72191.1	81745.9	30981.1	90102.1	96165.7	92304.9
M862T657			1.00816	1.32043	0.259748	862.001	656.806	24345.9	9841.49	24654.8	15289.7	32718.9	25048.9	25702	21519	16876	37957.7	48696.1	23413.1	19926.1	22819.7	20594.4
M682T623			1.00767	0.53979	0.218511	681.865	623.058	91442.3	42088.8	27593.8	12081.9	20055.2	21570.3	11911.1	10220.7	33798.1	11117.3	29022	19895.3	6622.87	6552.64	6394.5
M383T289			1.00679	1.68275	0.019364	383.012	289.424	1113.6	4223.86	9496.81	9215.49	9422.88	14156.6	15388.8	12582.5	11488.7	13394.7	13404	13889.4	15926.5	15927.9	15106.4
M576T661			1.00625	1.06791	0.849533	575.995	661.147	37610.3	77852.2	41367	7274.27	54596.7	25939.7	68516.3	75401.6	22446.7	52291.2	21298.3	21300	34516.3	42792.5	42417.5
M305T301			1.0062	0.466603	0.263114	305.302	300.976	5522.25	42254.8	10182.3	34455.8	104562	15085.6	14378	8015.93	14301.3	111.89	26843.2	35298.8	5149.6	5292.67	5323.12
M277T177			1.00618	1.19406	0.54368	277.059	176.983	18674.9	25373.9	15846	30078.5	25914.8	31003.5	8108.85	22495.5	13027.8	35416.9	51213.5	45134.4	20730	11107.2	20748.1
M496T286			1.00607	1.63098	0.0257179	496.119	286.159	1434.36	7750	11896.7	6552.86	11892.1	11817.3	13049.9	8626.09	15633.7	15953.7	15077.1	15399.6	9987.69	9993.59	10244.6
M741T81			1.00598	0.639854	0.140251	740.555	80.733	20662.5	64387.1	57523.9	61484.4	30272.9	33920.8	13062.5	51848.6	32284.4	13871.8	42053.5	18520.9	10087.5	13181.8	13246.8
M86T527			1.00569	0.544153	0.0577528	86.0955	526.643	53330.3	60871.5	28038.1	24157.8	23855.9	19955.8	14575.4	13704.1	27012.3	15539.4	23400.4	20154.6	9497.56	9495.21	9169.47
M986T653			1.00544	1.40782	0.0115271	985.507	652.558	7352.22	11823.4	9682.91	10346.2	12790.2	6718.17	11577.9	14400.8	13293.2	16884.2	11566.5	14935	13179.1	17220.9	13386.4
M376T685			1.00425	1.65778	0.104625	375.965	685.025	2744.71	16467.6	34663.1	29693.8	28383.9	14930.4	64620.7	30716.9	29259.4	22153.9	32496.9	31097.3	52758.2	52803.4	41111.7
M682T695_1			1.00339	2.83639	0.0102838	681.983	695.305	11135.3	1856.64	2894.73	2618.72	2619.62	4030.96	4020.23	14623.5	13863.9	14518.2	7791.01	16535.5	10863.4	10912.4	8804.26
M207T53			1.00267	0.504339	0.0258357	207.011	52.66	30568.2	23891.5	15539.5	41061.8	29946.8	10337.9	8835.99	8134.98	17663.3	14446	12633.9	14615.4	11128.3	10624.1	11128
M949T684			1.00253	1.46697	0.215842	949.485	683.871	14515.5	9816.47	5479.42	32491.7	40590	26327.7	40126.4	11170.7	43299.2	39882.8	22103.3	32981	36481.9	36809.8	30532.2
M765T626			1.0022	0.0825135	0.147053	764.661	626.072	59296.1	1806.95	47016.3	1385.07	1961.44	1400.75	2364.74	1047.14	1018.38	2393.61	1534.38	954.778	2247.33	2288.24	2246.21
M255T421			1.00136	1.28063	0.280263	254.934	421.226	8921.15	15135	30364.2	15462.8	33628.3	38198.4	41028.8	26117.6	25433.3	37085.9	31281.5	20531.4	38900.3	37494.8	37453
M578T71			1.00086	0.822502	0.199715	577.518	70.686	190373	171894	174428	294644	170465	159291	186800	190979	162148	105098	180068	129909	250219	250239	245437
M193T351			1.00075	0.213749	0.0812188	193.069	351.353	13396.9	3025.82	4569.99	30677.1	13098.6	1560.02	1967.46	2110.82	5184.44	570.284	2184.22	2160.39	611.279	613.74	701.549
M214T557			1.0005	0.476453	0.0658124	214.048	556.527	45119.9	27017.4	19396.3	8242.06	17715.8	15352.8	8810.3	4975.99	14642.2	9121.11	18497.4	7246.98	5201.73	5326.22	5416.25
M414T907			1.00015	0.221801	0.0474642	414.161	907.016	4493.59	9636.93	2854.19	26289	34242.2	12115.2	3271.02	3394.02	3870.48	2518.96	2714	4111.84	1835.67	1836.31	1933.03
M508T355			1.00003	0.75302	0.406575	508.375	355.349	114830	61987.2	47897	28724.1	40926	38970.3	55167.8	82817.7	35314.7	23074.8	31077.1	23555.5	48582	51811	51720.6
M309T79			1.00002	1.38423	0.242662	309.206	79.2505	12211.6	15187	13406.9	4699.56	8742.25	13997.5	8617.74	12841.3	11707	20935.7	11464.4	28900.2	13496.3	14358.9	14398.9
M155T251			0.999413	0.266397	0.0874987	155.045	250.837	8655.22	6968.7	3404.31	31665.4	12807.2	3938.44	3486.6	4175.4	4455.58	1278.21	3193.22	1376.6	1394.92	1413.55	1590.26
M282T72_5			0.99913	6.26073	0.37818	282.173	72.23	1489.9	1323.71	15333.6	3489.4	562.86	1123.05	1231.8	7380.72	134478	133.194	1891.97	900.46	1927.66	2085.31	4163.69
M1068T638			0.998973	1.72655	0.127282	1067.51	637.726	3918.68	8481.61	5524.47	9802.47	5346.01	9939.56	8022.45	10884.7	9362.41	14202.6	5821.95	25969.6	5983.82	6101.17	6692.22
M407T46			0.9978	0.209415	0.0317064	407.08	46.342	11782.3	4963.75	4451.2	25838.4	12155.9	4801.06	1508.94	2071.57	1921.89	1420.48	3087.52	3390.62	1233.63	1335.65	1335.49
M559T509			0.996688	0.46525	0.155562	559.149	509.096	26856.2	79612.3	24734.2	14279	19507.3	19440.4	9815.79	29911.9	21433.7	6287.4	13644.7	4712.27	4620.49	6117.83	4495.57
M178T303			0.996489	0.48937	0.378846	178.018	302.947	134270	19516.2	6299.97	3276.36	16521.4	43193.6	13200.8	14337.1	12526.4	30705.7	29657.9	8739.39	19028.1	20161.8	19722.9
M1173T657			0.996144	1.16272	0.444135	1172.98	657.212	23906.8	12393.3	22483.9	27715	29240.6	18451.2	23677.3	15704	18441.6	37369.8	23483.2	37351	18913.4	21568.8	23252
M222T479_1			0.99598	0.443899	0.37463	222.098	478.784	12126.4	137949	9574.1	9908.55	11445.6	34939.9	9252.52	10901.7	43986.7	13338.9	6493.86	11883.5	5220.66	5216.43	5095.57
M373T870			0.995821	0.715177	0.0254481	373.029	870.252	58307.1	62499.3	49510.9	41620.3	46354.2	40148.5	42998.4	45061.8	37898.2	27986.4	39575.3	19917.6	30104.5	30727.9	30725.4
M701T566			0.995546	1.93889	0.0272419	701.492	566.211	6505.26	2862.26	14398.5	7795.13	11676.9	14480.8	11702.8	15643.8	10976.3	25802.7	28069.3	19715.5	15934.8	15829.5	14030.3
M766T77			0.994723	1.36821	0.106279	765.524	77.4145	19158.1	18881.1	12577.3	17782.6	13051.5	15119	16246.3	17115.8	18054	24363.8	19883.1	36464.4	16915.8	16239	16899.6
M916T682			0.994678	0.593068	0.0400294	915.978	681.59	30377.2	43669.2	29863.3	19077	22900.3	16697	16509.9	17239.5	19802.1	10466.3	24123.5	8281.98	8691.53	8605.18	8690.34
M594T49_2			0.994567	0.210288	0.0242654	594.469	48.735	21042.4	17720.6	39427.4	18009.7	7954.15	2117.52	3456.1	1873.61	2025.85	5682.06	5651.58	3658.44	3827.12	3124.68	3835.01
M431T50_3			0.99409	0.338663	0.04875	431.385	49.8245	1124.12	40829.1	42990.6	32638.4	16155.5	10130.1	8615.41	7675.05	7556.82	7932.36	7325.98	9617.03	6005.88	6105.41	6106.57
M197T78_2			0.993713	0.429589	0.0372081	197.154	78.286	14565	21181.8	44620.1	37704.1	17073.4	9988.7	14644	11611.1	11545.3	7645.65	8700.53	8200.93	6813.8	6816.23	6360.7
M315T828			0.993695	0.971509	0.87738	314.904	828.34	34241	77327.7	46351.6	24318.7	49750.3	36979.6	50012.5	44584.9	33338.9	41896.4	38100.2	53373	34555.6	36202.8	36181.4
M293T77			0.993403	1.81555	0.171454	293.159	77.391	4710.29	16701.8	5841.22	2702.72	14359.4	12196.2	4503.02	12020.6	15071.3	17167.8	15323.3	38513.8	9565.91	9329.75	9566.28
M246T73			0.993061	2.14309	0.0277682	246.115	73.054	3748.13	10512.8	5389.49	3716.06	4638.68	6093.21	9847.16	17225.2	6947.12	10181.2	7859.34	21015.9	5847.22	6064.99	6066.67
M367T679			0.992809	1.7843	0.0475225	366.974	678.762	5686.67	11695.1	6520.94	7598.75	5299.23	8198.44	19495.4	18791.1	7207.45	16987.4	5860.23	11950.5	9816.55	9846.04	8126.75
M695T50			0.992687	1.46448	0.118201	695.311	50.12	8108.13	11159.6	20073.9	15383.9	7069.61	12721	6577.44	27407.5	19794	17287.6	19673.4	18387.7	7543.23	7615.1	7764.2
M967T701			0.992566	0.705918	0.00276571	967.031	701.198	72543.6	84343.1	85867.9	79880.9	78788.9	60159.7	54793.9	49710.6	57904.4	44520.8	46084.5	72826.2	57550	57596.3	55768.3
M740T698			0.992255	1.22925	0.197398	740.491	697.678	22016.5	9149.36	32565.5	18189.5	22856.2	25760.2	29337.5	18541.1	28746.8	28984	28319	26534.2	30248.6	27829	27527.9
M945T654			0.992042	1.56659	0.105915	944.51	654.497	6420.39	9846.47	11017	14532.7	11587.9	6796.05	27065.5	7907.61	13805.3	14037.2	10111.1	21382.6	8315.47	9644.03	9661.8
M309T601			0.991952	0.278363	0.174524	309.137	600.766	4950.99	9328.64	9013.46	53497	7225.91	9736.36	3168.58	3255.04	7948.81	1449.36	8548.47	1726.94	2353.79	2517.7	2353.09
M416T59			0.991819	1.50062	0.0709607	416.351	59.476	14557.6	17431.7	6448.59	6545.92	11647.1	9466.97	15510.3	14042.1	12057.4	18987.3	13063.4	25527	11277.5	11277.4	11200.3
M580T718			0.991802	1.07702	0.769798	579.97	717.527	32133	24224.8	14021.7	57625.2	53522.5	51448.3	23445	56260	18651.4	55114.1	46445.5	51003.4	72480.1	63850.4	64050
M345T732			0.991507	1.46386	0.0747929	345.079	732.497	7793.7	8807.95	17312.5	13607.3	19803.4	24003.3	24019.6	25239.6	18060.8	31916.3	18507.5	15947.5	27971.6	27970.3	28282.3
M125T252			0.991316	0.464561	0.0343443	125.037	251.76	38131.5	40567	20286.5	9842.7	28640	12688.4	17519.7	11359.9	12862.9	6450.76	11876.7	9686.56	8187.95	9971.27	9920.77
M856T690			0.991044	1.14406	0.668848	855.502	690.383	11056.5	16131.3	60317.5	48738.2	23683.7	64802.7	34690.3	23722.2	52837.1	75955.2	33214	36684.7	45318.3	45452.2	37948.7
M520T391			0.990123	1.18501	0.706366	520.339	391.167	82554.6	73876.6	228004	48829.5	125947	92634.8	41842.6	48760.7	276897	32598.3	120498	251848	19023.7	18562.2	18807.3
M244T520			0.988544	0.574906	0.0185888	244.078	519.827	61213.1	46069.3	27361	35243.5	41613	28877.4	30541.1	21215.6	32477.2	13649.2	14873.6	25437.5	7082.57	7020.85	3673.93
M293T112			0.987815	1.07566	0.6417	293.176	112.316	37342.6	36134.2	26184.3	17074.2	24249.1	26687.9	19248.2	27049.7	28693.6	30953.4	31730.3	42683.6	39823.1	38868.6	38869.5
M149T229			0.987584	0.53014	0.0766274	149.027	228.803	17222.5	39868.5	22608.1	31489.1	21003.4	11110.7	17896.1	7844.24	27732.9	3345.61	14825.2	4326.35	4468.04	5162.21	4495.84
M695T682			0.987573	0.487214	0.115231	695.003	681.893	39949.3	78400.7	26790	14048.3	23365.4	18202.5	8573.43	16664.4	24980.1	14267.8	18942.6	14382.9	8764.37	8769.88	7803.84
M367T731			0.987562	1.62089	0.0112511	367.104	730.724	8873.02	8613.53	7000.8	4597.95	8036.27	6320.82	9545.96	8411.5	15307.2	10871.4	10247.4	16031.8	7082.1	7076.23	6792.2
M295T49			0.987435	0.324384	0.0070648	295.226	48.734	19444.4	28656.4	30555	25802.3	9614.34	7646.5	7341.78	4197.05	4870.4	7228.57	7109.6	8736.28	4220.89	4501.36	4488.4
M398T830			0.987335	1.37255	0.136772	398.025	829.699	19369.8	14710	7806.64	4304.43	11419.6	13881.2	14103.5	14506	18510.7	21058.6	10257.3	19689.6	10964.4	11051.3	11051.3
M343T142			0.986317	0.4526	0.0114733	343.226	142.488	12103.4	8843.45	14473.2	28327.9	22040.6	21427.5	8431.71	6565.74	13296.3	7122.52	6414.07	6695.6	5100.63	5147.35	5100.9
M119T682			0.986231	1.39793	0.150033	119.016	681.738	12172.3	23129.8	7227.08	5761.37	12550.6	13898.8	12065.8	25780.1	18390.3	15601.7	18531.1	14112.1	12677.8	14951	13343.6
M340T51			0.986136	1.27412	0.705908	340.249	51.075	134857	6725.43	90658.3	10048.2	5474.31	12246.3	50135.6	140656	64450.4	5645.73	4070.66	66324.2	8935.6	69233	69288
M409T48_2			0.985435	0.150283	0.0106175	409.367	48.0745	18361.9	13722.1	27680.2	14607.2	6511.4	1603.02	1914.5	1817.73	2788.33	1644.06	2141.97	2089.62	1362.62	1421.71	1355.03
M983T689			0.984861	1.41424	0.324409	982.97	689.193	6453.79	14037.3	12919.9	8673.68	24081.4	11926.7	12837.8	9838.67	9049.58	28981.5	13960.2	35773.8	16966.7	13475.3	13845.5
M184T285			0.984718	0.929007	0.881665	184.072	284.91	82352.3	78768.3	37975.8	13420.6	13895	25057.1	59967.9	17538.7	22473.5	10217.5	103338	20080.5	11369.5	13228.7	10972.2
M222T439			0.984693	0.829532	0.649889	222.134	439.406	238944	8944.12	162733	48675.7	127119	89155.2	82396.1	61663.2	199319	48545.1	114970	53513.8	22327.6	24555.2	24523.3
M730T664			0.984422	0.784362	0.423051	730.048	664.434	93304.3	94342.9	58043.2	21776.8	31643.3	34923.7	37884.6	44952	70439.7	24570.1	42794.9	41362.5	9606.2	10331.2	10924.9
M104T745			0.983404	0.554597	0.171416	104.106	744.882	42577.8	81274.2	30233.8	15913.3	17728.2	19319.7	23673.6	21403.6	22906.8	18272	19206.3	9365.45	14873.6	14024.2	14030
M169T78			0.982545	0.349115	0.020401	169.123	78.455	14973.7	14134.8	38547.5	27449.2	14442.2	8710.9	8768.65	8274.6	4264.17	4111.23	5424.56	10442.6	4227.09	4142.02	4366.37
M137T500			0.982489	0.746437	0.143093	137.045	500.298	106004	68388.3	108979	72952.9	82520.3	88064.1	71759.4	110138	87907.9	38790.4	51460.9	33247.6	57850	54019.9	57918.4
M709T645			0.98167	0.450682	0.0360781	709.235	645.016	25070.4	24300.3	20424.9	6067.05	13733.5	10684.7	10396.2	9505.9	9450.15	1826.88	13460	555.631	4003.27	4313.74	4300.43
M343T75			0.981436	0.736227	0.156152	343.226	74.67	105978	91993.3	177299	59479.1	146017	128652	125727	61639.4	87998.1	58341.9	112682	75903.8	54929.8	55405.1	54933.2
M292T321			0.98142	1.55284	0.0853654	292.034	320.875	1564.52	16137.7	14999.6	2895.11	10710	9350.3	16128.3	12497	18409.1	15268.6	11872.3	12251.5	8018.71	8196.9	9654.01
M171T180			0.980944	1.17568	0.334252	171.102	179.981	20522.2	33533.5	20160.8	20335.4	32578.9	31923.7	31505.2	41703.9	40944.3	20045	22758.9	30039.9	8213.25	8188.94	9035.58
M279T183			0.980878	0.577598	0.197924	279.232	182.763	71810.8	41812.1	24059.6	15525.2	18857.7	16058.3	18369.6	24936.2	30052.8	14851.6	9119.07	11330.7	8193.91	8197.05	8809.8
M260T771_4			0.980505	0.776774	0.706886	260.066	771.043	2303.16	3169.73	178709	143304	169039	1746.58	158430	847.227	156735	1865.91	2443.58	66722.8	114502	115373	114806
M844T300			0.980066	0.993524	0.986997	843.591	299.595	8454.28	11527.5	69020	15474.4	72045.2	72809.2	41424.7	43838.6	22133.7	28009.8	29229	83080.1	59610.6	59552	48337.6
M520T398			0.979139	0.306123	0.156386	520.278	398.117	77300	5779.93	20363.5	12926.2	10697.5	19049.6	2940.13	4911.81	16348	2333.11	8896.49	9300.11	9787.1	10063.5	11753.8
M439T380			0.97902	0.762882	0.539886	439.3	380.211	53805.6	39607.4	104559	172921	92447.7	20300.7	115758	24619.8	126179	14974.4	25677.4	61752.2	21287	20607.7	21288.6
M283T858			0.978985	0.264036	0.0675268	283.132	857.564	23123.4	34231.5	23176	1490.13	8047.49	3782.11	5744.62	903.343	11767	1258.54	4085.41	1020.98	1476.42	1471.61	1354.2
M585T76			0.978927	1.5537	0.136683	585.373	76.349	15555	14065	29538.9	6460.76	19425	17319	19489	35729.6	21104.8	12358.8	24615.4	45744.6	23684.5	25384.6	25373.8
M869T682			0.978566	1.25643	0.361026	868.985	682.105	10157.6	23373.9	18346.8	33368.2	22918.8	24423.6	7185.8	41763.3	23570	34760.2	23873	35436.7	22961.1	20509.2	22949.4
M315T710			0.978044	0.683211	0.0856462	315.108	710.351	49629.5	69219.1	43017.8	30010.8	36708.2	35729.2	35778.9	35385.7	39736.8	21796.2	36651.5	11233.6	21780.2	22704.9	21807.1
M1089T711			0.976275	0.414632	0.00944939	1089.43	711.178	19393	21502.8	16432.3	9127.16	8421.8	11360.5	7403.95	10293.8	7649.22	3994.16	5659.72	756.096	4199.65	3848.27	3978.12
M842T358			0.975591	2.92215	0.224667	841.641	357.682	1598.35	3818.71	5215.51	3257.46	7734.77	4694.47	2935.75	7009.5	5847.13	7371.71	8884.19	44860.6	9770.7	12139.4	9921.01
M301T52			0.974837	0.239102	0.0330896	301.179	52.337	32321.3	3238.12	23114.6	1211.81	24996.4	20420.8	2748.07	1256.53	12770.8	3946.66	2373.6	2082.41	11361	11850.6	11848.3
M821T311			0.974338	2.09517	0.00894199	820.544	311.049	5430.42	5394.66	10748.3	2503.93	8120.86	6876.07	7472.74	15857.1	13571.3	12159.4	11595.5	21211.3	11641.6	11672.8	13056.7
M588T701			0.974272	0.634008	0.0550841	588.306	700.717	31457.6	40077.7	33558.6	17899	29264.3	25741.6	27519.3	22942.9	24087	10870.7	24531.5	2901.36	14271.8	14248.7	14744.1
M445T431			0.974084	1.80038	0.198261	445.301	431.267	5755.7	12271	5921.66	6638.97	8527.21	14937.5	8385.33	26729.9	7116.93	36153.7	11241.5	7687.24	7584.05	7715.6	7716.42
M819T298			0.974054	1.25955	0.212285	818.602	297.67	48100.6	78918.6	79272	67879.3	66909.5	59960.5	110395	79175.8	68013.1	45250.8	126847	75450.5	106779	119951	120360
M260T65			0.973952	1.35899	0.193542	260.095	64.628	19580.7	17927.3	8317.74	13851.3	8346.76	8431.23	11246.5	12524	27743.4	16258.7	14905.3	21224	6497	6495.75	6570.51
M334T633			0.973606	0.573147	0.133226	334.049	633.223	68661.6	43844.9	31196	14712.9	23503.9	19293.6	13902.6	10119.7	26897.3	15176.4	29781.9	19446.8	13039.4	13041.7	13621.5
M564T72			0.972076	1.4177	0.101746	563.502	72.285	9415.02	8263.81	20076.6	6211.1	7115.39	16451.7	10260.7	16957	16836.6	16967.4	15728.1	18992.8	15833.9	15768.6	13680
M120T723			0.9719	0.70201	0.236338	120.002	722.951	74863.9	85837.4	49774.9	15148.7	34566.4	39777.5	30575	31552.6	54653.1	18840.5	42180.5	32779.3	14378.3	15666.7	15662.7
M506T700			0.971866	0.673915	0.120011	506.303	700.426	26080.6	55480.3	44009.6	26776.2	39232	38644.5	35666.1	31008	37949.7	12429	34422.4	3675.61	20802.5	20137.3	20142.8
M161T186			0.971826	0.280057	0.0428278	161.045	185.774	19532	6756.85	6544.78	26577.6	8457.27	3889.51	4404.99	2668.71	2887.89	2087.49	5504.57	2542.65	2637.15	3004.23	2668.5
M681T409			0.971078	0.827899	0.105364	680.514	409.298	138255	71897.9	116253	156188	127670	143155	103030	101863	106146	99796.1	105814	107105	97750.4	99363.9	99353.9
M524T338			0.970064	0.653255	0.419779	524.276	338.369	17279.2	23814	124133	47207	165002	63710.9	121588	15217.3	25082.4	19468.1	87326.1	19499.1	70135	67849.3	70149
M341T325			0.969753	0.289005	0.0301341	341.352	324.916	26794.1	28935.6	19816.1	14732.9	5973.16	3141.65	11977.4	1116.41	7714.56	3077.86	3113.99	1724.99	1672.54	1631.18	1537.91
M740T776			0.969379	1.42133	0.0977285	740.492	776.27	5353.37	9418.79	12462.9	14224.7	11094.8	9205.5	14412.1	8371.7	12698.8	19364.5	11473.9	21460.4	18667.2	18048.4	25612.7
[truncated: 16,970 more rows]

## Sheet: description
name	adduct	description	VIP	Fold change	p-value	m/z	rt(s)	ctl-1	ctl-2	ctl-3	ctl-4	ctl-5	ctl-6	LDHA-cko-1	LDHA-cko-2	LDHA-cko-3	LDHA-cko-4	LDHA-cko-5	LDHA-cko-6	QC-1	QC-2	QC-3	KEGG.ID	HMDB	CellularLocations	SuperClass	Class	SubClass	DirectParent
[truncated: 480 more rows]

[truncated: 1 more sheets: VIP>1]
