# Supplementary material for: Ldha-Dependent Metabolic Programs in Sertoli Cells Regulate Spermiogenesis in Mouse Testis
Source: Biology (Basel). 2022 Dec 9;11(12):1791. doi: 10.3390/biology11121791 (PMC9775226; doi:10.3390/biology11121791)
Supplement: Supplementary file 1 [file biology-11-01791-s001.zip › Supplement excel S4 up-metabolites in the Ldha-cKO and control sperm.xlsx]

## Sheet: up-metabolites
name	adduct	description	VIP	Fold change	p-value	m/z	rt(s)	ctl-1	ctl-2	ctl-3	ctl-4	ctl-5	ctl-6	LDHA-cko-1	LDHA-cko-2	LDHA-cko-3	LDHA-cko-4	LDHA-cko-5	LDHA-cko-6	QC-1	QC-2	QC-3	KEGG.ID	HMDB	CellularLocations	SuperClass	Class	SubClass	DirectParent
M759T98	(M+Na)+	Thioetheramide-PC	13.2989	2.27745	0.0532672	758.567	98.436	838988	693614	892996	883840	1.15318e+06	1.12149e+06	1.24844e+06	1.82188e+06	2.34111e+06	2.54839e+06	446724	4.31101e+06	1.33412e+06	1.33421e+06	1.31367e+06
M341T676	(M-H)-	Sucrose	3.33567	2.43927	0.100816	341.108	676.018	77077.3	19476.3	39221.4	98795.6	67217.2	20727.3	261103	93468	46880.4	31458.8	105490	248301	44862.2	45952.9	45951.9	C00089	HMDB0000258/HMDB0125600	Extracellular	Organic oxygen compounds	Organooxygen compounds	Carbohydrates and carbohydrate conjugates	O-glycosyl compounds
M732T356	(M+H)+	Sphingomyelin (d18:1/18:0)	2.16369	2.10587	0.0409955	731.603	355.888	20453.2	9521.25	27479.7	58542	31079.2	34415.8	73224.7	25091.9	50700.1	81659.7	41195.4	110326	29258.3	27921.2	27892	C00550	HMDB0001348/HMDB0010168/HMDB0010169/HMDB0011698/HMDB0011699/HMDB0012084/HMDB0012085/HMDB0012087/HMDB0012088/HMDB0012089/HMDB0012090/HMDB0012091/HMDB0012092/HMDB0012093/HMDB0012094/HMDB0012095/HMDB0012096/HMDB0012100/HMDB0012101/HMDB0012102/HMDB0012103/HMDB0012104/HMDB0012105/HMDB0012107/HMDB0013461/HMDB0013462/HMDB0013463/HMDB0013464/HMDB0013465/HMDB0013466/HMDB0013467/HMDB0013468/HMDB0013469	Extracellular;Membrane	Lipids and lipid-like molecules	Sphingolipids	Phosphosphingolipids	Phosphosphingolipids
M302T76	(M+H)+	Sphinganine	0.923462	1.85602	0.0934372	302.304	76.41	3506.02	5169.14	12996.7	22656	6542.06	6896.41	23006.6	15766.3	9567.58	11083.7	16181.6	31609.6	4822.13	4823.65	4900.73	C00836	HMDB0000269	Cytoplasm;Extracellular;Membrane (predicted from logP);Endoplasmic reticulum	Organic nitrogen compounds	Organonitrogen compounds	Amines	1,2-aminoalcohols
M184T81	(M+H)+	Phosphorylcholine	2.02653	1.82839	0.0770759	184.072	80.767	37275.5	29448.7	78167.2	39531.7	65630.8	29537.5	37218.3	67569.9	117872	69184.3	63331.7	156027	34361.2	41427.3	41246.3	C00588	HMDB0001565	Cytoplasm (predicted from logP)	Organic nitrogen compounds	Organonitrogen compounds	Quaternary ammonium salts	Phosphocholines
M212T877	(M+H)+	Phosphocreatine	1.64052	5.20635	0.0198118	212.042	876.96	2798.3	5756.12	4758.47	1417.84	7652.28	6996.5	3777.7	12090.7	24456.7	39937.9	20013.5	52683.7	17341.8	17342.4	17451.4	C02305	HMDB0001511	Mitochondria	Organic acids and derivatives	Carboxylic acids and derivatives	Amino acids, peptides, and analogues	Alpha amino acids and derivatives
M241T75	(M-H)-	Pentadecanoic Acid	1.88489	1.62702	0.0233176	241.216	75.1945	21045.9	3875.2	40250.5	24378.8	41846.1	43692.5	46861.7	45259.8	52581.3	48073.5	37522.8	54574.6	37381.9	37466.9	39318.6	C16537	HMDB0000826	Cytoplasm;Extracellular;Membrane	Lipids and lipid-like molecules	Fatty Acyls	Fatty acids and conjugates	Long-chain fatty acids
M241T75	(M-H)-	Pentadecanoic Acid	1.88489	1.62702	0.0233176	241.216	75.1945	21045.9	3875.2	40250.5	24378.8	41846.1	43692.5	46861.7	45259.8	52581.3	48073.5	37522.8	54574.6	37381.9	37466.9	39318.6	C16537	HMDB0000826	Cytoplasm;Extracellular;Membrane	Lipids and lipid-like molecules	Fatty Acyls	Fatty acids and conjugates	Long-chain fatty acids
M779T234	(M-H+2Na)+	PC(16:0/16:0)	2.73905	2.065	0.0254996	778.536	233.842	11264.2	14635.1	80645.7	36601.5	149189	171311	161479	204737	183620	123176	165001	119418	99053.8	82226	98241	C00157	HMDB0000564/HMDB0007878/HMDB0007879/HMDB0007880/HMDB0007882/HMDB0007884/HMDB0007886/HMDB0007887/HMDB0007897/HMDB0007898/HMDB0007911/HMDB0007912/HMDB0007913/HMDB0007914/HMDB0007936/HMDB0007937/HMDB0007938/HMDB0007939/HMDB0007940/HMDB0007958/HMDB0007959/HMDB0007960/HMDB0007961/HMDB0007964/HMDB0007966/HMDB0007967/HMDB0007981/HMDB0007982/HMDB0007983/HMDB0007984/HMDB0007985/HMDB0008002/HMDB0008003/HMD…	Cytoplasm;Extracellular;Membrane	Lipids and lipid-like molecules	Glycerophospholipids	Glycerophosphocholines	Phosphatidylcholines//1-acyl,2-(1Z-alkenyl)-glycerophosphocholines
M204T118	(M-H)-	Pantothenol	0.721486	1.6667	0.0612519	204.124	118.183	1420.11	3982.45	2511.02	8879.76	4940.3	4523.84	10998.8	6660.9	7505.68	4095.77	7443.91	7058.24	2450.5	2466.83	2184.69	C05944	HMDB0004231	Cytoplasm (predicted from logP)	Lipids and lipid-like molecules	Fatty Acyls	Fatty amides	N-acyl amines
M787T366	M+	N-Docosanoyl-4-sphingenyl-1-O-phosphorylcholine	1.0657	1.56414	0.0738162	786.651	365.913	8017.78	19612.6	7808.64	8997.03	9344.59	22247.6	18878.2	28839.1	10702.6	22599.5	18600.4	19299.5	20004.4	20000.7	20187.3
M284T892	(M+H-H2O)+	N-Acetyl-D-Glucosamine 6-Phosphate	2.03843	1.70003	0.0482302	284.053	891.706	49510.9	63653.9	32518.9	10236.8	26047.3	47189.5	36636	69189.6	75907	72264.3	41232.7	94344.9	31531.5	32115.1	31530.8	C00357	HMDB0001062	Cytoplasm (predicted from logP)	Organic oxygen compounds	Organooxygen compounds	Carbohydrates and carbohydrate conjugates	Acylaminosugars
M227T76	(M-H)-	Myristic acid	4.64757	1.51809	0.00564343	227.201	76.2525	116787	126782	258859	173185	265503	218312	320786	265689	322889	270666	271653	308430	245169	264434	264158	C06424	HMDB0000806	Cytoplasm;Extracellular;Membrane (predicted from logP)	Lipids and lipid-like molecules	Fatty Acyls	Fatty acids and conjugates	Long-chain fatty acids
M227T76	(M-H)-	Myristic acid	4.64757	1.51809	0.00564343	227.201	76.2525	116787	126782	258859	173185	265503	218312	320786	265689	322889	270666	271653	308430	245169	264434	264158	C06424	HMDB0000806	Cytoplasm;Extracellular;Membrane (predicted from logP)	Lipids and lipid-like molecules	Fatty Acyls	Fatty acids and conjugates	Long-chain fatty acids
M279T74_2	(M-H)-	Linoleic acid	16.627	1.70623	0.0168465	279.233	73.543	1.84141e+06	2.37851e+06	2.22125e+06	639035	1.81741e+06	1.73676e+06	2.47544e+06	3.48852e+06	2.44462e+06	4.29232e+06	1.93886e+06	3.50494e+06	2.59875e+06	2.60178e+06	2.66485e+06	C01595	HMDB0000673	Cytoplasm;Extracellular;Membrane (predicted from logP)	Lipids and lipid-like molecules	Fatty Acyls	Lineolic acids and derivatives	Lineolic acids and derivatives
M279T74_2	(M-H)-	Linoleic acid	16.627	1.70623	0.0168465	279.233	73.543	1.84141e+06	2.37851e+06	2.22125e+06	639035	1.81741e+06	1.73676e+06	2.47544e+06	3.48852e+06	2.44462e+06	4.29232e+06	1.93886e+06	3.50494e+06	2.59875e+06	2.60178e+06	2.66485e+06	C01595	HMDB0000673	Cytoplasm;Extracellular;Membrane (predicted from logP)	Lipids and lipid-like molecules	Fatty Acyls	Lineolic acids and derivatives	Lineolic acids and derivatives
M112T797	(M+H)+	Histamine	0.534709	1.63495	0.472021	112.086	797.014	5859.9	5790.9	3430.87	3262.99	2191.83	4072.34	1676.44	1521.44	5223.29	3528.33	4697.96	23586.7	6200.54	4757.61	4597.77	C00388	HMDB0000870/HMDB0060263	Extracellular	Organic nitrogen compounds	Organonitrogen compounds	Amines	2-arylethylamines
M362T813	(M-H)-	Guanosine 5'-monophosphate (GMP)	0.644809	1.66779	0.377311	362.05	813.39	2882.97	8724.22	2622.4	2050.97	4190.34	3042.31	2378.9	4855.23	3476.61	2830.23	6206.29	19467.8	1917.85	1781.75	1917.01	C00144	HMDB0001397	Extracellular;Mitochondria;Nucleus;Lysosome;Golgi apparatus	Lipids and lipid-like molecules	Fatty Acyls	Eicosanoids	Prostaglandins and related compounds
M285T35	(M+H)+	Glycitein	0.334882	1.79702	0.484024	285.076	35.419	12113.8	15552.5	4113.84	3717.31	4083.93	926.184	6800.8	8730.53	46882.3	1955.59	2723.79	5699.95	849.635	847.369	894.925	C14536	HMDB0005781	Membrane (predicted from logP)	Phenylpropanoids and polyketides	Isoflavonoids	Isoflav-2-enes	Isoflavones
M171T795	(M-H)-	Glycerol 3-phosphate	2.65561	2.5301	0.078448	171.006	795.13	33134	39563.3	41616.9	19853.8	49822.5	48600.5	30091.9	32860.4	208529	54722.3	160459	101815	34404.7	34469.4	35599.5	C00093	HMDB0000126	Cytoplasm;Mitochondria	Lipids and lipid-like molecules	Glycerophospholipids	Glycerophosphates	Glycerophosphates
M171T795	(M-H)-	Glycerol 3-phosphate	2.65561	2.5301	0.078448	171.006	795.13	33134	39563.3	41616.9	19853.8	49822.5	48600.5	30091.9	32860.4	208529	54722.3	160459	101815	34404.7	34469.4	35599.5	C00093	HMDB0000126	Cytoplasm;Mitochondria	Lipids and lipid-like molecules	Glycerophospholipids	Glycerophosphates	Glycerophosphates
M173T856	(M+H)+	Glycerol 3-phosphate	1.04242	2.50039	0.0760752	173.02	855.994	16389.2	19356.2	18810.2	11545.8	23211.8	26833.5	14616.9	16266.7	94279.2	24931.3	86717.7	53600.5	16373.8	16759.5	16721.5	C00093	HMDB0000126	Cytoplasm;Mitochondria	Lipids and lipid-like molecules	Glycerophospholipids	Glycerophosphates	Glycerophosphates
M91T193	(M-H)-	Glycerol	0.277422	1.67934	0.0216152	91.0392	192.805	227.441	472.78	696.091	546.067	776.43	920.702	970.639	1392.77	545.339	1106.27	1128.23	968.742	634.77	637.093	669.312	C00116	HMDB0000131	Extracellular;Mitochondria	Organic oxygen compounds	Organooxygen compounds	Carbohydrates and carbohydrate conjugates	Sugar alcohols
M613T992	(M+H)+	Glutathione disulfide	0.232558	2.5084	0.103485	613.158	991.802	770.566	782.739	805.018	703.03	532.267	493.712	700.347	614.432	1057.55	2476.58	4214.84	1188.9	714.925	716.236	902.917	C00127	HMDB0003337	Extracellular;Mitochondria	Organic acids and derivatives	Carboxylic acids and derivatives	Amino acids, peptides, and analogues	Oligopeptides
M401T676	(M+CH3COO)-	Galactinol	1.93924	2.31129	0.104612	401.129	675.919	27783.3	6123.53	15421.8	35336	22226.6	7454.22	76762.7	33136.5	15628.2	13744.2	34060.6	90953.2	15057	15262	15561	C01235	HMDB0005826	Cellular Locations Not Available	Organic oxygen compounds	Organooxygen compounds	Carbohydrates and carbohydrate conjugates	O-glycosyl compounds
M257T67	(M+H-H2O)+	Fisetinidol	0.293173	2.44104	0.399583	257.08	67.2885	10168.6	7586.76	2426.39	3362.57	3684.84	1365.98	6268.28	5106.61	49863.9	923.262	3229.46	4410.38	751.48	739.784	806.91
M338T15	(M+H)+	Erucamide	0.407553	1.60126	0.10261	338.341	15.468	2502.96	2307.49	2134.43	2572.93	2431.59	2426.55	2710.1	6927.99	2667.59	2077.26	3011.59	5625.16	2601.78	2601.8	2594.88
M71T139	(M-H2O-H)-	Dihydroxyacetone	0.574923	2.11337	0.0326474	71.0133	138.971	1657.98	3486.19	2114.88	188.555	2014.87	1326.8	2872.61	3503.5	6296.34	5355.52	2668.55	2105.23	856.748	1592.12	1073.28	C00184	HMDB0001882	Cytoplasm (predicted from logP)	Organic oxygen compounds	Organooxygen compounds	Carbohydrates and carbohydrate conjugates	Monosaccharides
M191T154	(M-H2O-H)-	D-Galactarate	2.86419	1.83114	0.0810141	191.019	153.582	60552.5	79622.2	156882	39891.2	49358.2	91307.2	127853	155185	269187	103274	163563	55515.3	57870.1	62405.5	57979	C00879	HMDB0000639	Cytoplasm (predicted from logP)	Organic oxygen compounds	Organooxygen compounds	Carbohydrates and carbohydrate conjugates	Glucuronic acid derivatives
M191T154	(M-H2O-H)-	D-Galactarate	2.86419	1.83114	0.0810141	191.019	153.582	60552.5	79622.2	156882	39891.2	49358.2	91307.2	127853	155185	269187	103274	163563	55515.3	57870.1	62405.5	57979	C00879	HMDB0000639	Cytoplasm (predicted from logP)	Organic oxygen compounds	Organooxygen compounds	Carbohydrates and carbohydrate conjugates	Glucuronic acid derivatives
M147T141	(M-H)-	D-Arabinono-1,4-lactone	1.67615	1.93163	0.0475117	147.029	141	22925.4	25038.4	35372.5	6168.7	21033.6	20001.3	49176.6	22084.5	61191	38173.1	64625.9	16904.1	17076.8	16710.4	17065.2
M147T141	(M-H)-	D-Arabinono-1,4-lactone	1.67615	1.93163	0.0475117	147.029	141	22925.4	25038.4	35372.5	6168.7	21033.6	20001.3	49176.6	22084.5	61191	38173.1	64625.9	16904.1	17076.8	16710.4	17065.2
M255T74	(M+H)+	Daidzein	0.497472	2.532	0.38253	255.065	74.231	33370	11068.4	6910.84	4625.26	16095	2169.57	13179.3	12853.9	131705	2968.03	6793.21	20473.5	1990.49	1993.63	2108.02	C10208	HMDB0003312	Membrane (predicted from logP)	Phenylpropanoids and polyketides	Isoflavonoids	Isoflav-2-enes	Isoflavones
M103T434	(M-H)-	D(-)-beta-hydroxy butyric acid	0.556789	2.46798	0.106051	103.04	433.609	2204.49	1771.15	1266.15	690.569	594.433	2525.31	4858.94	1971.57	1621.59	8790.4	777.917	4319.97	2766.12	2794.49	3135.4
M306T649	(M+H-H2O)+	Cytidine 5'-monophosphate (CMP)	0.244412	1.74101	0.244188	306.048	649.158	718.079	861.746	982.219	869.06	965.016	642.279	610.747	909.694	993.302	688.664	1748.44	3821.04	640.043	626.415	640.016	C00055	HMDB0000095	Extracellular;Mitochondria;Nucleus;Lysosome;Golgi apparatus	Nucleosides, nucleotides, and analogues	Pyrimidine nucleotides	Pyrimidine ribonucleotides	Pyrimidine ribonucleoside monophosphates
M290T878	(M+H)+	Asp-Arg	1.27594	2.52761	0.120117	290.145	878.148	2035.74	20414.1	4418.37	2548.28	4889.16	4424.82	9527.04	28780.7	3188.22	26995.8	2936.51	26467.1	12309.1	12748.2	12747.7
M279T75	(M+H)+	alpha-Linolenic acid	4.29497	1.51201	0.0764766	279.231	74.864	231036	182590	264486	56754.6	235419	518999	369021	401908	335794	391581	319299	434204	279433	281167	279433	C06427	HMDB0001388	Cytoplasm;Extracellular;Membrane (predicted from logP)	Lipids and lipid-like molecules	Fatty Acyls	Lineolic acids and derivatives	Lineolic acids and derivatives
M277T74_2	(M-H)-	all cis-(6,9,12)-Linolenic acid	5.37196	1.60971	0.054808	277.216	74.101	222701	296756	305368	85050.7	225587	248796	291102	478122	293686	584598	214287	366457	331200	339866	339366	C06426	HMDB0003073	Cytoplasm;Extracellular;Membrane (predicted from logP)
M277T74_2	(M-H)-	all cis-(6,9,12)-Linolenic acid	5.37196	1.60971	0.054808	277.216	74.101	222701	296756	305368	85050.7	225587	248796	291102	478122	293686	584598	214287	366457	331200	339866	339366	C06426	HMDB0003073	Cytoplasm;Extracellular;Membrane (predicted from logP)
M401T54_2	(M+H)+	7-Oxocholesterol	2.50569	1.88338	0.117843	401.34	53.548	48765.4	59646.8	34889.8	26809.5	52301.9	46088.2	52902	62081	36138.2	111358	58434.2	184777	51482.7	50347.5	51731.3
M324T766	(M-2H+3Na)+	3'-O-methylcytidine	0.27342	1.50616	0.348624	324.054	765.88	468.786	1098.31	988.155	843.919	671.375	1198.01	808.873	803.245	797.434	1374.41	695.852	3455.48	658.511	650.126	572.826
M309T70_2	(M-H)-	2E-Eicosenoic acid	2.33121	1.80461	0.0624965	309.279	69.677	39555.8	39648.1	34272.7	27833	24191.4	37765.4	42046.4	64413.6	45176.9	80117.8	23995	111067	42040.8	42621.7	42759.4
M309T70_2	(M-H)-	2E-Eicosenoic acid	2.33121	1.80461	0.0624965	309.279	69.677	39555.8	39648.1	34272.7	27833	24191.4	37765.4	42046.4	64413.6	45176.9	80117.8	23995	111067	42040.8	42621.7	42759.4
M811T259	(M+Na)+	1-Stearoyl-2-oleoyl-sn-glycerol 3-phosphocholine (SOPC)	7.06788	1.98258	0.0569266	810.597	259.33	118954	160522	335832	418821	442791	478517	616823	523970	404175	1.25271e+06	334876	744254	607773	537530	527052	C00157	HMDB0000564/HMDB0007878/HMDB0007879/HMDB0007880/HMDB0007882/HMDB0007884/HMDB0007886/HMDB0007887/HMDB0007897/HMDB0007898/HMDB0007911/HMDB0007912/HMDB0007913/HMDB0007914/HMDB0007936/HMDB0007937/HMDB0007938/HMDB0007939/HMDB0007940/HMDB0007958/HMDB0007959/HMDB0007960/HMDB0007961/HMDB0007964/HMDB0007966/HMDB0007967/HMDB0007981/HMDB0007982/HMDB0007983/HMDB0007984/HMDB0007985/HMDB0008002/HMDB0008003/HMD…	Cytoplasm;Extracellular;Membrane	Lipids and lipid-like molecules	Glycerophospholipids	Glycerophosphocholines	Phosphatidylcholines//1-acyl,2-(1Z-alkenyl)-glycerophosphocholines
M482T382	(M+H)+	1-Stearoyl-2-hydroxy-sn-glycero-3-phosphoethanolamine	4.18303	1.90528	0.265924	482.324	381.784	362156	178125	63752	60530	63297.5	51333.8	538980	461061	119872	258387	55756.3	50524.2	354314	360344	360345
M137T602	M+	1-Methylnicotinamide	0.553987	1.87487	0.176451	137.07	602.153	5186.57	6216.35	2472.55	3234.22	3493.62	2432.28	3655.37	5912.18	9122.44	2729.21	4438.36	17331.2	2834.51	2847.81	2834.53	C02918	HMDB0000699	Cytoplasm;Extracellular	Organoheterocyclic compounds	Pyridines and derivatives	Pyridinecarboxylic acids and derivatives	Nicotinamides
M787T173	(M+H)+	1,2-dioleoyl-sn-glycero-3-phosphatidylcholine	3.00087	1.85233	0.0356092	786.599	172.605	69336.1	80713.1	110712	155254	183935	147822	164995	352520	146924	239113	342832	138734	170197	162563	162537
M319T79			12.8465	170.46	0.00122368	319.19	79.112	16125.5	3033.67	5348.17	1971.06	5024.43	3580.8	1.47476e+06	910417	1.48571e+06	957348	4762.11	1.14736e+06	684999	764735	762694
M497T394_1			2.28184	54.9758	0.24162	497.275	394.14	1196.89	3959.8	2348.63	5479.54	4700.92	14321.5	257941	29519.2	1.4328e+06	31139.6	3582.26	4642.25	181903	194054	193150
M629T621			0.193174	20.2631	0.35091	628.745	620.945	89.4876	310.315	314.942	188.043	236.51	341.315	50.9619	121.695	29289.4	186.075	150.503	203.18	3605.56	552.386	1022.67
M307T421			1.25993	18.5909	0.342597	306.964	420.817	870.677	1068.53	297.249	1498.82	592.924	779.087	231.053	698.45	1994.3	90954.7	254.404	816.566	183.162	263.139	265.048
M129T64			0.847712	11.651	0.335837	128.932	64.451	158.632	1009.74	704.788	1800.59	920.208	1231.63	1074.47	28.8754	3066.96	713.409	62398.5	591.676	325.141	297.094	324.433
M317T712_1			1.84693	10.9635	0.353288	317.082	712.03	4620.91	6786.35	5447.19	8329.46	8491.17	7503.27	3930.46	6705.16	426433	4982.24	7299.1	2108.55	5361.29	5732.22	5729.2
M635T69			2.08286	10.8297	0.360365	634.504	69.393	2112.76	2442.2	2036.69	5016.98	11335.6	2513.96	2539.33	1699.72	4204.88	2488.7	1411.81	263361	2073.75	2201.58	2088.99
M127T65_1			0.648716	10.4471	0.334414	126.935	64.648	525.122	609.271	417.552	1017.45	573.413	651.558	613.53	453.542	1686.46	460.286	36041.2	385.241	407.085	428.183	549.383
M284T55			1.22978	9.97625	0.116612	284.259	55.332	4399.22	7672.34	4283.11	2849	1670.82	874.604	2022.63	2186.65	116695	64371.2	28285.6	3413.01	25772.1	25732.7	6950.88
M142T918			2.01301	9.84626	0.0202606	142.005	917.967	1916.5	1035.1	950.259	20365.7	847.534	441.842	71606.8	397.192	1151.66	52686.4	58974	66824.2	36927.4	37154.8	37455.4
M279T80			6.43064	8.81614	0.346718	279.159	79.831	4876.12	12387.4	6707.48	242255	213822	4085.53	4106.67	3.88244e+06	367907	3478.39	6875.46	3378.32	143120	142051	23935.5
M394T54			1.4945	7.31457	0.0557244	394.351	53.614	7319.44	4656.15	6050.61	7625.08	4130.54	2680.99	76384.7	2746.67	5029.83	5327.53	76562.9	71400	1825.57	1826.5	1606.11
M122T39			1.55833	6.88009	0.0694347	122.059	38.7705	6784.91	3591.54	2081.59	12949.6	6672.29	1625.31	1046.48	72807.5	5049.12	73482.3	77859.9	1649.88	79275	79402.9	79871.2
M282T72_5			0.99913	6.26073	0.37818	282.173	72.23	1489.9	1323.71	15333.6	3489.4	562.86	1123.05	1231.8	7380.72	134478	133.194	1891.97	900.46	1927.66	2085.31	4163.69
M227T341			1.12884	5.96031	0.00489222	227.013	340.751	1031.22	2141.65	1632.36	1210.83	2324.88	878.23	2609.7	5198.01	7374.85	16870	12278.5	10618	8548.76	8563.04	9108.59
M559T331_1			2.43494	5.83779	0.227448	559.244	331.098	16477.7	60504.9	983.148	1147.06	3223.51	2794.27	1885.5	1521.45	205284	1163.82	285915	1204.92	1137	1241.94	1136.42
M345T856			0.334771	5.74706	0.100418	345.034	855.925	727.757	1188.86	1139.85	462.653	1445.21	1617.9	514.738	748.698	17035.3	1491.22	12891.3	5147.21	826.443	739.198	729.792
M317T70_2			1.37748	5.18017	0.355327	317.174	70.364	8446.58	10790.1	4400.06	4289.14	5262.05	4395.9	167375	4174.09	3995.42	8556.31	4194.23	6395.69	3944.86	3067.47	4058.91
M293T72_2			0.334238	5.09469	0.390336	293.247	71.9565	203.111	150.346	113.58	1358.19	202.532	148.739	123.005	223.248	225.496	225.803	10058.3	232.74	1100.09	1053.32	4396.25
M367T470			0.737366	5.03671	0.188999	367.061	469.79	815.606	1496.99	1200.97	682.033	1062.22	1071.88	9029.72	733.975	1028.78	1167.89	1018.9	18901.6	1482.12	1203.08	1258.86
M337T872			1.35884	4.8501	0.18811	337.142	871.882	3195.37	4534.78	7347.05	4365.91	1503.27	8917.3	6401.92	85060.3	3085.66	40569.6	5567.67	4156.72	5729.13	5341.76	8528.25
M949T1020			0.301676	4.78517	0.00826516	948.962	1020.02	55.0405	181.097	156.556	208.761	142.845	422.952	123.864	1263.3	1250.52	927.72	481.898	1538.19	543.53	543.524	534.766
M504T43			0.691694	4.72433	0.079562	504.25	42.554	1992.73	3277.79	1186.07	1492.9	1036.93	1383.7	1398.32	11693	20130.4	13265.5	1343.6	1160.99	1720.98	1531.8	1732
M367T856			0.201339	4.63724	0.0869848	367.016	856.343	483.314	275.927	367.863	122.948	350.207	761.792	250.251	295.71	4747.28	672.246	3290.41	1697.49	324.938	324.975	355.865
M484T916			0.487316	4.62966	0.0766601	484.115	915.787	1053.37	795.361	1276.12	709.692	588.051	972.156	567.369	783.079	1647.55	8447.96	9856.76	3673.09	3131.92	3257.3	3130.04
M315T329			0.939616	4.56758	0.0176002	315.138	329.329	425.17	1893.47	740.165	2055.74	2161.06	1768.92	2121.18	3526.21	2556.4	10421.2	11460.4	11226.4	6157.69	6160.87	6257.61
M251T77			1.39028	4.43967	0.0968329	251.163	76.843	2849.9	3954.6	6052.55	2599.14	4553.79	2723.89	4950.42	38214.2	6979.93	4750.52	5829.19	40206.7	3173.33	3573.05	3554.51
M861T88			0.658961	4.34649	0.0113734	861.48	87.798	463.199	285.081	152.44	828.476	470.247	2534.49	800.837	2668.27	3864.23	3015.73	3627.45	6599.48	1676.65	889.446	1666.3
M227T305			1.07381	4.30329	0.0439946	227.013	304.646	774.333	5179.03	4569.13	1779.81	2328.42	922.892	963.275	4412.03	9396.94	25246.4	17674.1	9239.08	9712.92	12718.2	12708.4
M276T856			0.640975	4.22314	0.0401298	276.118	855.713	3146.73	888.842	2536.97	3643.17	2129.88	2452.41	1849.99	1443.85	13818.3	9594.57	23311.8	12475.6	4886.51	4885.69	4991.22
M948T1019_2			0.38485	4.20581	0.0115677	948.213	1018.91	108.75	433.184	248.398	258.584	550.162	636.573	214.704	2008.82	2361.33	1815.8	614.142	2387.92	958.678	931.029	932.172
M719T290			1.09231	4.17778	0.079233	718.534	289.688	2944.13	2662.6	3278.78	2882.86	3620.41	4833.83	5555.14	2143.37	17710.8	12677	7362.09	39037.2	5842.26	5788.49	5788.01
M251T671			0.402713	4.17344	0.169409	250.891	670.693	268.249	520.936	64.3142	798.422	278.82	182.828	311.99	416.235	375.045	2701.96	337.76	4677.87	3215.39	3097.26	3105.29
M279T342			4.23779	4.17232	0.0509638	278.981	342.25	3831.24	213974	2663.63	3213.68	3461.05	899.481	3212.82	140599	300122	117109	231806	158617	111536	113466	113432
M720T380			1.82837	3.94775	0.021213	719.565	379.848	7737.81	9671.95	8131.7	4737.53	7714.05	6771.71	23288.1	16706	19704.8	44972.3	10416	61632.8	8642.64	9167.85	8640.95
M505T780			2.17292	3.90738	0.0226635	505.214	779.66	5358.86	7024.26	8339.28	42203.4	4590.74	9075.81	67122.8	6166.79	41579	87744.6	26689.6	69972.5	15873	50520.4	50313.6
M360T420			0.477375	3.89785	0.0332528	360.273	419.7	1026.3	1094.74	639.442	696.497	1145.4	732.281	1425.32	1245.54	7422.69	3075.94	1899.11	5725.1	1835.57	1582.38	1843.65
M948T1018			0.388454	3.86972	0.0124387	948.463	1018.36	137.555	462.426	435.944	398.464	617.522	629.723	188.319	2156.97	2557.46	1688.92	924.046	2861.46	1073.74	1049.83	1074.48
M216T877			0.471894	3.86101	0.027243	216.014	876.956	518.269	776.581	586.319	310.429	555.07	718.744	479.628	1224.25	2179.92	3293.9	1456.67	4745.62	1786.81	1859.22	1855.52
M949T1019_1			0.361234	3.86063	0.00967204	948.713	1018.9	112.329	353.342	257.915	335.527	460.325	631.732	214.234	1808.97	1900.01	1555.45	671.285	2154.91	871.655	858.117	867.171
M281T343			0.39232	3.83187	0.16233	280.975	342.787	341.029	1070.95	116.84	314.424	151.57	176.086	187.539	309.715	502.03	3532.77	361.071	3425.46	421.396	1726.71	606.251
M783T148			4.66864	3.79644	0.0037942	782.567	148.371	68468.9	59698.5	121908	100088	153030	63045.9	119881	222015	552022	320901	509042	425831	168552	167504	168540
M654T895			0.445851	3.75641	0.247405	654.094	895.381	1032.35	1566.96	700.801	154.483	1184.96	659.393	307.875	704.904	1836.35	356.859	3926.46	12772.5	505.497	538.14	506.384
M365T796			0.598047	3.7425	0.0494624	365.001	795.673	1123.98	583.371	1320.05	678.544	1259.06	1326.96	561.636	1239.45	8188.81	2174.55	6942.8	4440.48	1149.53	1150.59	1202.82
M389T856			0.321125	3.73199	0.066743	388.998	856.457	556.548	934.973	1084.33	367.401	1074.96	1666.86	518.641	687.556	7817.72	1696.91	6164.88	4330.94	1071.13	1064.73	1071.13
M731T85			1.92124	3.7061	0.0999561	730.537	85.4335	55116.7	36894.7	10453.5	7251.27	15471.3	19748.7	175200	7444.49	30879.1	50285.1	219798	53541.5	50427.3	51407.6	50432.1
M322T803			0.901244	3.70199	0.245114	322.043	803.298	2782.2	3865.3	3392.48	722.895	2684.39	722.919	1063.8	1054.89	5294.17	1605.7	10005	33434.3	1402.99	1509.04	1511.04
M733T121			10.5091	3.69747	0.00376815	732.552	120.685	264238	263215	475301	91905.1	97038.2	678756	717549	829861	1.35134e+06	1.12819e+06	835356	2.05364e+06	729794	729857	722069
M298T70			0.505458	3.65318	0.0946514	298.161	70.043	1921.1	2950.2	1042.28	826.129	1033.82	799.04	10962.2	674.753	11931.3	2593.96	1285.78	3869.14	1440.55	1436.98	1312.01
M104T564			0.100408	3.62894	0.355477	104.052	563.537	108.366	66.4778	71.8754	76.6735	45.4722	32.6324	50.6803	1148.38	67.0934	93.158	39.6617	58.0408	178.524	1337.66	137.812
M315T298			1.16147	3.62251	0.0243841	315.137	298.202	1153.19	3259.33	3157.85	1300.2	5333.17	3690.65	4423.01	6446.78	5382.63	12217.5	13198.2	23154.5	6326.83	6047.65	6047.35
M856T80			0.430769	3.58085	0.0901346	855.617	79.7335	726.59	502.461	262.954	2557.53	383.573	3341.56	296.734	5383.44	10960.8	7259.19	3734.64	205.122	626.248	1682.94	1027.17
M308T556			0.78127	3.57832	0.214421	308.125	555.517	1912.78	1611.47	1887.79	537.178	1456.98	1816.73	1312.95	2622.55	1355.77	6614.45	1286.52	19810.3	2788.81	2778.66	2248.32
M535T873			0.619862	3.50744	0.009158	535.127	872.507	980.623	1039.25	2087.2	2190.57	778.389	1371.14	943.212	4027.71	5506	9003.01	5608.48	4539.52	5014.02	5362.33	5362.43
M337T40			0.174307	3.50087	0.342195	337.037	39.6175	2398.53	1176.09	497.238	1183.14	887.787	357.208	1531.63	1069.03	17267.7	404.886	931.35	1551.06	277.431	275.041	303.757
M732T83			1.15778	3.45763	0.18158	731.541	83.079	27567.9	22354.9	3541.77	2151.18	5037.47	8165.04	82903.4	2154.13	9114.71	17309	114037	12430.1	21404	22120.7	22105.2
M210T816			0.607814	3.4312	0.0279006	210.028	816.428	604.772	1536.22	414.048	767.401	1198.58	858.384	842.252	1463.32	3482.33	4603.39	1932.49	6134.03	2198.54	2198.58	2216.44
M393T49_1			4.1243	3.36805	0.202572	393.338	49.311	17352.3	10718.7	16877.5	11318.5	364255	2622.47	1884.38	1009.29	466392	551677	603.579	403604	164200	162456	29239.8
M271T66_2			0.653094	3.36711	0.298995	271.118	66.097	757.091	2108.92	912.557	2323.54	9425.47	3709.01	9355.62	1487.13	44249.2	5330.45	1369.73	2979.55	3263.64	3267.49	3510.46
M433T49_2			0.575073	3.36245	0.18174	433.328	49.274	321.364	927.523	681.751	688.111	11287.8	149.674	3101.92	337.053	16573.9	19731.3	6917.72	601.303	1208.03	712.255	2859.37
M367T795			0.426454	3.35786	0.0817125	366.966	795.117	624.366	352.248	785.366	536.873	896.608	1003.41	426.396	576.923	5140.44	969.746	4581.15	2404.55	798.707	827.48	827.462
M799T308			2.17777	3.31005	0.309117	798.562	308.451	13158.6	20705.4	7432.31	9374.44	20434.7	33017.2	9996.5	23919.3	23875.3	30740.3	13262.3	242858	15415.5	17931.2	15394.4
M731T288			0.621137	3.28035	0.0744764	731.213	287.659	325.159	432.585	2026.15	1617.89	2879.81	2745.84	2993.28	2597.17	6210.59	2482.53	4278.36	14331.6	2290.11	2500.76	2500.66
M731T287			4.67902	3.25953	0.0121578	730.536	286.744	20329.9	22081.9	97509.7	105007	169965	113182	192599	247032	354685	157832	211799	557327	153574	159412	157234
M184T1003			1.54481	3.25234	0.110701	184.073	1003.43	26245.3	23923.3	16787	11687.9	17442.2	22614	13987.8	25503.9	46969.2	121819	161173	16598.2	30521.8	31167.7	46210
M298T74_2			0.443128	3.25123	0.0552341	298.188	74.458	552.564	475.609	406.209	1808.85	704.777	692.575	730.768	907.326	4555.85	4028.51	739.405	4125.75	1331.83	1722.18	1320.23
M269T78			1.24054	3.22989	0.159003	269.175	78.197	24782	3639.24	1773.08	1924.15	2191.59	1625.66	44350.7	28151.8	2309.74	1352.61	36778.3	3125.12	38938.9	38952.7	42902.8
M708T293			2.68328	3.219	0.00285825	707.539	293.238	13625.2	9708.8	43005.7	27878.5	35711.4	26893.4	83192.7	55271.7	116593	74009.2	44646.3	131100	50718.5	50730.5	51720.9
M687T338			0.843852	3.19966	0.170979	687.433	337.674	637.351	1220.95	3117.66	2401.5	5058.37	5632.86	4895.01	5102.82	6779.61	3541.52	5894.64	31600.1	4127.75	3960.71	4111.89
M269T63			0.61938	3.18604	0.355407	268.997	62.624	2059.17	640.702	9587.99	4536.98	1207.29	461.754	4987.04	734.631	43527.6	2185.23	6445.03	1042.78	859.976	1034.29	964.746
M253T78_1			1.27319	3.10869	0.270809	253.05	77.572	17584.5	11472.5	5477.91	4354.86	17867.7	4487.22	12397.3	14546.9	122890	14705.3	7965	17886.3	8551.5	5644.26	8532.69
M945T48			0.613004	3.07977	0.00252486	944.75	47.7305	927.697	1967.39	382.702	775.217	1231.53	1597.56	3257.37	2541.09	2307.8	4820.87	2705.28	5562.87	2946.66	2890.54	2946.08
M705T145			2.35901	3.06321	0.0461075	704.52	145.198	7794.89	6341.88	27034	27216.8	32595.7	20878.7	36589.1	22760.2	61668.6	139653	30867.7	81749.4	17235.5	17246.2	16452.7
M210T403			0.424523	3.03613	0.371569	210.077	403.38	364.938	1343	1475.49	4340.35	1611.32	1495.73	4362.67	24250.1	1347.14	771.806	532.253	1012.58	624.419	596.84	624.183
M443T387			0.241919	3.02764	0.172365	443.354	386.593	1519.53	375.523	881.725	329.057	881.185	967.803	788.167	953.527	8046.84	1849.85	1429.99	1933.07	995.526	894.644	909.711
M691T238			0.594449	3.02509	0.0196926	690.503	237.894	238.598	258.028	1679.47	1024.57	899.035	2243.97	1161.45	2409.03	3415.03	2268.2	3783.34	6153.14	2407.38	2039.76	2421.77
M773T317			1.46477	3.02137	0.0601402	772.546	317.394	9529.76	10347.6	5482.13	4323.85	10175.8	5569.96	8821.84	14323.3	11437.5	31613.5	16427.9	54633.8	13604.6	13900.4	13533
M411T857			0.256373	3.01922	0.038181	410.979	857.063	374.663	459.609	541.824	129.799	500.18	764.47	372.945	539.5	2853.57	1066.92	1572.52	1959.42	507.403	505.953	551.085
M262T366_2			0.606361	3.01564	0.0599713	262.091	365.562	2655.81	1052.74	1343.86	327.723	1564.01	774.14	1417.27	5556.29	8048.67	1016.19	1738.21	5498.98	822.201	857.186	857.043
M464T877			0.334899	3.00931	0.0274609	464.043	876.991	173.801	470.621	481.585	165.978	366.72	707.614	223.135	951.017	1245.01	2136.65	686.358	1878.82	749.02	749.081	722.292
M206T36			0.516198	2.97199	0.336543	205.979	36.3345	2946.96	2752.87	1633.44	1585.03	2436.38	1032.65	1440.64	5861.26	25885	1013.91	1117.21	1497.07	776.734	704.112	682.274
M426T332			1.97108	2.95021	0.183189	426.357	331.982	121978	119643	72679.8	38867.7	69937.7	45532.5	153727	139060	743578	84493.4	218443	43283.7	91062.9	95483	91149.8
M842T358			0.975591	2.92215	0.224667	841.641	357.682	1598.35	3818.71	5215.51	3257.46	7734.77	4694.47	2935.75	7009.5	5847.13	7371.71	8884.19	44860.6	9770.7	12139.4	9921.01
M255T75_4			0.579824	2.90918	0.147146	255.162	75.37	76.4885	3571.9	23.4254	21.1375	16.8432	5246.23	4663.66	10.9054	8245.26	4268.96	96.0541	8769.86	76.3964	56.3565	4876.28
M705T291			3.00586	2.89	0.0147294	704.52	291.424	8844.2	9482.09	70284.4	71621.5	81201.4	63443.2	126336	127884	241328	67054.8	87773.9	230718	77139	69656.4	69802.8
M759T286			12.3806	2.87567	0.0112397	758.568	286.395	256755	233993	701553	614498	987771	982980	1.06145e+06	1.54729e+06	1.84634e+06	1.52324e+06	1.37344e+06	3.51125e+06	1.29205e+06	1.29816e+06	1.29823e+06
M365T795			0.443719	2.87086	0.061777	364.947	795.108	1082.16	593.35	547.674	502.144	447.665	563.051	1113.18	1020.35	1112.39	2140.58	972.479	4366.7	906.571	792.542	1005.84
M229T855			0.458238	2.86159	0.0334401	229.046	854.991	545.926	1352.88	591.545	1615.94	417.683	488.919	3874.05	3145.31	3394.79	547.354	2806.16	577.205	2734.1	2833.99	2834.23
M186T891			0.493432	2.85703	0.102511	186.054	891.002	464.007	718.532	751.444	3255.77	10554.7	1071.32	9823.22	1375.91	16265.6	10592.2	9112.55	873.782	6105.55	6219.97	6105.39
M655T695			1.4252	2.85252	0.035483	654.962	694.657	5230.35	6925.66	7503.59	8329.76	5185.49	11613.3	14391.9	43774.5	7739.4	27005.1	8932.17	25916.2	9634.75	9083.48	10001.7
M721T380			0.965686	2.84513	0.132403	720.57	380.13	3251.06	5349.09	4214.97	4718.3	5797.41	3841.06	5351.1	8592.45	7786.63	7685.15	9751.11	38141.2	5162.75	5166.88	4875.84
M682T695_1			1.00339	2.83639	0.0102838	681.983	695.305	11135.3	1856.64	2894.73	2618.72	2619.62	4030.96	4020.23	14623.5	13863.9	14518.2	7791.01	16535.5	10863.4	10912.4	8804.26
M735T290			6.06331	2.80904	0.00778455	734.566	290.195	73440.7	72659.6	194700	126571	228274	246240	312209	286621	438164	401184	385448	822169	302326	302932	283723
M787T240			9.17938	2.77783	0.00970069	786.598	240.15	147967	189733	213005	592635	525603	462735	370688	724304	798394	1.41401e+06	1.06297e+06	1.55109e+06	622642	776864	776605
M933T47			0.670198	2.76626	0.0336772	932.716	47.376	2497.24	1946.85	367.385	729.907	1507.8	2874.1	4193.71	3061.95	1132.81	6334.5	3745.61	8981.81	3318.29	2745.52	3220.01
M759T255			3.36205	2.74173	0.0617247	758.568	254.597	26473.2	28684.1	216023	194686	59040.1	73226.4	91719.6	397250	581247	218766	131696	219242	133130	168654	133584
M520T178			0.849322	2.7405	0.186897	520.331	178.257	5419.31	3362.2	18591.7	22618.2	12276.6	6027.69	10568.3	76994	71034.1	8310.56	5892.93	14364.6	4553.84	5204.97	5126.63
M789T180			1.43158	2.74042	0.0532355	788.523	180.006	2114.26	1058.02	8624.2	15700.8	5678.13	8343.44	4324.41	13521.2	7201.6	27949.4	25857.9	34924.6	13153.4	11971.7	11960.3
M339T44			0.407066	2.73425	0.362345	339.163	44.311	939.969	228.015	1103.78	4791.97	218.713	236.088	1477.52	13553.7	314.503	4910.92	100.586	200.278	3052.58	845.532	325.886
M757T285			3.91704	2.72881	0.0080021	756.551	285.361	18771.1	18551	92764	64438.8	101456	118436	111764	166548	234767	164158	131765	321863	128901	119400	128899
M544T691			1.17275	2.72158	0.174533	543.981	690.889	4406.41	8464.2	20540.7	9369.89	1011.04	8165.64	15782	70396.6	9417.98	27804.2	10787.6	7218.88	11348.3	6091.49	11312.5
M598T307			0.349904	2.70304	0.0998079	598.489	306.589	530.763	364.762	812.838	699.627	967.796	549.456	961.93	832.146	1780.77	1158.68	1142.5	4734.08	1154.03	1163.21	1359.61
M210T60			0.460871	2.69941	0.347844	210.041	59.937	1234.47	778.041	3894.98	1421.31	587.441	400.67	245.104	14347.4	624.351	6372.67	416.303	444.93	1651.36	943.585	1054.49
M541T66			0.325217	2.69744	0.130404	541.287	65.971	657.186	601.813	250.926	703.155	588.287	2686.85	5248.65	4610.22	492.211	288.785	2938.3	1225.99	1173.75	425.866	684.96
M577T586			0.15258	2.69446	0.20013	576.975	586.218	50.8873	335.703	767.363	456.611	935.257	463.858	2646.71	474.995	408.704	461.669	3775.99	341.384	1590.02	1589.78	1545.51
M448T330			1.14957	2.67066	0.288468	448.341	329.547	84514	35894.8	41092.9	20536.9	36901.6	101440	99179.9	59916.9	528914	47465.8	106174	13975.5	53593.1	53559.8	49665.6
M753T77_1			0.50551	2.66545	0.185978	752.514	77.0135	8068.52	4967.14	7145.97	13239.5	5945.62	2530.15	8031.29	7552.97	11516.3	16230.5	58378.2	9964.75	10921.8	11315.3	11547.9
M730T779			0.856641	2.66058	0.0131311	730.243	778.824	656.573	1222.01	2097.38	3689.86	2539.54	7548.51	7771.94	8818.53	4828.59	13364.1	4923.53	7528.92	13327.8	13329.7	12658.7
M671T227			0.346653	2.65614	0.0115668	671.461	226.577	172.366	134.248	629.689	456.908	613.151	682.608	470.026	739.189	2004.72	1264.91	1239.64	1423.78	1208.28	1317.83	1527.93
M936T48			0.624145	2.62948	0.0312601	935.736	47.99	1230.01	4167.33	155.509	762.867	1056.19	1866.02	3035.28	2981.61	2051.57	5668.9	3218.52	7335.03	3108.34	3000.54	3108.16
M308T129			1.0373	2.62541	0.0536167	308.171	129.451	2386.91	2654.22	4158.63	3276.72	5667.59	12058.5	9410.62	10473.4	4630.19	11647.8	13949.1	29182.9	6828.44	8722.25	8667.33
M961T48			0.859784	2.61211	0.0126065	960.748	48.032	3013.51	6842.61	713.481	1273.38	1784.1	3950.9	6303.69	5793.87	3980.73	10834.7	7084.14	11918.4	5164.1	5164.5	5031.51
M131T64			0.388577	2.60316	0.250937	130.93	63.793	558.439	2027.07	1225.08	840.597	893.912	1132.47	2182	877.52	2010.15	1530.05	10046.4	736.68	801.497	889.402	799.927
M781T225			3.83887	2.59301	0.0282307	780.552	224.531	18550.1	21549.2	82666.4	82345.4	283889	64810.1	321443	233972	91560.4	326117	316271	146675	189919	166718	189090
M281T58			1.19633	2.58404	0.213174	281.137	57.709	6779.58	5387.64	2308.57	16311.9	39527.2	2729.3	1915.84	3997.59	3735.69	42634.8	73641	62824.4	19503.9	10475.1	19529.8
M263T71			0.772977	2.58265	0.135006	263.165	71.028	4790.78	1756.47	4079.11	8094.07	1860.85	2006.29	19373.6	19375.8	2435.59	3562.27	564.642	13023.8	830.839	830.186	874.923
M717T230			1.05947	2.57878	0.00533478	716.522	229.587	1268.71	946.269	6010.82	7052.88	4153.52	4001.55	4790.86	14315.3	11124.8	7493.73	9966.92	12738.9	10283.5	9254.56	9255.97
M309T70_2			0.514854	2.57756	0.187512	309.169	70.141	10600.2	1014.78	824.784	515.509	831.673	499.24	431.062	7144.83	400.553	5485.27	12638.1	10723.6	2730.25	559.609	1199.21
M733T289			8.16547	2.56547	0.0121244	732.552	289.211	86253.4	93286.3	389734	470297	544120	609221	669663	858345	1.17062e+06	583506	708693	1.63502e+06	570141	586311	569997
M826T360			0.733138	2.56064	0.0165163	825.644	360.079	1717.56	1727.39	3506.13	2272.32	3925.91	3190.42	3580.62	5646.11	4748.75	6637.2	7765.83	13461.6	3890.98	3902.58	4065.81
M743T225			1.57571	2.56018	0.0229368	742.538	224.96	3803.51	1983.69	13648.9	6447.28	9940.25	16225	7205.2	21697	13117.5	32667.1	22630.1	35937.1	12294	11943.3	14795
M501T840			0.397929	2.55943	0.135094	501.197	839.547	823.064	1142.4	1148.44	608.071	1445.39	1624.55	1381.14	984.612	5091.32	1360.97	1308.25	7257.14	2835.37	2894.13	3583.31
M169T71_1			0.395625	2.55905	0.120242	169.075	70.644	1092.79	1266.39	446.301	959.748	484.924	207.863	1802.46	3819.71	554.902	3978.08	660.963	592.178	1077.18	681.792	653.684
M763T300			1.62852	2.55234	0.409154	762.543	300.021	23734.8	26715.3	13729	10857.9	13154.3	12145.5	12409.5	14147.6	18425.2	6492.53	12100.8	192518	9067.42	11548.4	11581.4
M253T74_1			0.535204	2.54073	0.506043	253.028	74.259	3676.21	5001.59	2553.59	1871.28	10487	3978.19	2305.49	1437.05	62585.3	932.037	684.208	2098.35	1837.29	1841.2	1674.35
M937T48_2			0.612212	2.53868	0.0221205	936.741	48.005	1375.49	3649.85	497.742	689.35	1008.88	2430.4	3215.04	2902.39	1585.92	6040.67	4328.98	6429.6	3205.99	3164.46	3164.03
M620T67			0.105046	2.53558	0.465283	620.436	66.534	6049.18	3424.2	2392.07	15158.6	5854.54	1624.09	2020.82	745.721	3104.44	2365.33	71657.3	7590.75	1730.42	1573.72	1743.95
M975T49			0.547536	2.5275	0.0272413	974.725	48.646	1577.48	2526.79	275.444	667.336	1015.41	1889.77	2322.82	1830.82	1893.74	4847.29	3170.55	6034.05	2253.17	2252.85	2323.59
M841T217			1.75551	2.52717	0.118235	840.573	216.613	5096.47	1862.02	11775.6	11762.6	7589.56	33563.9	6152.92	20618.7	17228.4	43927.7	21893.1	71251	26506.5	24322.4	24347.6
M664T958			0.332713	2.52687	0.024943	664.171	957.903	812.678	814.047	914.572	351.436	547.181	591.646	521.555	971.909	1537.62	3107.96	2329.29	1718.88	1089.55	1089.42	997.411
M477T788			0.50143	2.5252	0.148267	477.167	787.857	953.088	1189.33	606.576	943.167	883.36	1681.16	1067.43	2128.14	1318.83	3844.39	404.34	7036.24	1082.17	1075.37	1152.4
M576T64			0.123241	2.52423	0.46732	576.408	63.5055	8696.69	7905.76	1884.22	16020	4939.49	1150.58	2679.78	1949.47	3811.15	1706.84	84237.1	8091.08	1561.91	1602.47	1519.32
M185T362			0.419634	2.52278	0.0823694	185.056	362.101	757.53	1684.75	889.27	652.026	895.284	772.017	721.656	942.176	2909.46	2712.17	5510.43	1460.04	2648.42	2628.82	2629.03
M629T408			0.326144	2.50532	0.504032	629.381	407.978	307.417	2401.44	2518.67	287.24	2172.87	2983.32	37.1936	23542.1	2284.62	98.8122	239.465	531.918	64.7392	70.7908	70.744
M427T39			0.603032	2.49882	0.342928	426.966	39.439	3320.92	3573.64	2202.42	4505.39	1570.17	3038.81	3102.06	30298.6	2142.21	2698.9	3990.16	3274.85	2485.89	2155.92	2482.63
M387T63			7.8899	2.49462	0.396172	387.251	63.1565	3129.3	1.99926e+06	8457.67	2019.88	2863.22	1.65124e+06	5093.42	6.04429e+06	1.56489e+06	1.52791e+06	2237.63	3278.39	13683.1	664190	660242
M812T267			5.8969	2.49088	0.0714772	811.601	266.566	50451.8	284510	134659	113171	154134	337992	141806	214266	171298	714396	605430	830291	220026	230500	241453
M957T48			0.597298	2.48384	0.0119553	956.715	48.092	1435.45	3227.66	260.714	664.455	658.559	2578.64	3169.61	3315.54	2290.15	5714.68	2802.71	4628.33	3038.8	2931.84	3048.23
M923T48			0.600667	2.47201	0.0229785	922.684	48.1045	2468.18	3982.9	311.573	1009.18	762.105	1835.87	4704.34	2788.84	2084.08	4279.72	4234.11	7543.2	2878.75	2949.75	2879.38
M890T48			0.622718	2.47066	0.0281454	889.689	47.937	1506.55	5074.2	197.011	759.103	560.886	1762.81	3702.71	4041.57	1700.46	5963.27	3726.19	5227.92	3270.37	3639.99	3636.92
M725T666			0.366396	2.46049	0.0173999	724.568	665.87	285.801	78.9305	555.145	1140.75	826.913	1262.43	2359.35	937.24	718.09	2059.13	1683.61	2453.53	1804.33	1677.56	1797.04
M903T47			0.445907	2.45734	0.00880392	902.732	47.46	987.745	2293.66	264.714	721.262	668.846	1116.7	2940.76	1443.63	1303.29	2867.89	3133.91	3184.63	1701.1	1698.04	1756.14
M498T665			0.355141	2.45644	0.0236696	498.399	665.435	344.345	98.6396	832.341	1154.45	841.238	629.885	963.807	1245.95	843.618	1834.64	1718.76	2975.56	2796.88	3023.59	3019.24
M653T909			0.479719	2.45167	0.308751	653.11	908.642	1459.95	3948.54	1965.08	154.04	2410.87	1391.85	665.886	1360.83	2388.49	1074.89	5705.77	16582.4	818.823	863.625	863.634
M577T297			0.86593	2.45111	0.00543612	577.359	296.727	594.153	1139.94	3223.75	1561.75	6436.06	4640.97	7043.04	10819.4	5266.74	6539.43	6733.81	6728.96	6166.07	6154.5	5622.21
M269T794			1.32734	2.45106	0.0896497	268.973	793.607	9385.75	11041.7	10993.9	5903.27	12806.2	11683.7	7345.81	7918.02	53728.2	13532.3	42528	26458.3	9349.42	9351.37	9593.43
M959T47			0.722219	2.44797	0.069194	958.732	47.424	1889.61	6037.7	414.803	1092.69	1521.9	3658.58	5332.31	2055.14	2281.5	9252.41	5563.8	11292.6	4780.09	4637.73	4778.36
M249T786			0.59657	2.43209	0.0233678	249.068	786.339	2622.96	2077.36	2335.53	845.493	400.535	1180.09	4964.94	3690.91	1032.79	6590.18	3021.92	3711.62	3349.55	3451.38	3681.31
M365T731			2.92611	2.43074	0.151593	365.105	731.265	83013.3	31420.9	36996	130372	65032.9	19643.2	208329	138452	51560.5	35925.3	73188.8	383357	37426.5	36783.6	36788.7
M734T786_2			0.493224	2.43064	0.0511363	734.268	785.858	711.407	700.826	1512.03	1442.36	823.551	1800.75	1001.07	3902.34	1456.91	3072.25	1829.38	5730.45	1565.68	1612.53	1555.25
M447T337			0.22829	2.41841	0.165699	447.328	337.472	2152.77	1106.38	1326.13	663.676	2970.83	876.788	1757.34	2663.02	10416.6	1485.53	3797.51	1879.32	704.387	822.577	827.926
M219T405			0.293022	2.41839	0.017669	219.078	404.794	530.275	877.788	353.672	869.034	408.96	344.46	387.781	845.052	1542.4	1530.7	1679.78	2198.59	587.532	790.936	612.884
M332T531			0.541224	2.41332	0.00120994	332.075	531.275	1499.11	891.21	1101.25	1225.46	861.215	981.346	4185.83	2277.97	2406.32	1871.72	2791.33	2297.21	2576.02	2500.15	3144.21
M594T305			0.454413	2.40991	0.0670733	594.359	305.094	1137.4	418.369	812.701	233.445	726.454	1652.59	1128.89	1413.75	1134.61	2739.25	1247.95	4339.2	1435.31	1427.93	1328.65
M703T352			4.9206	2.40943	0.084257	702.561	351.726	189290	288245	300050	209408	239854	224290	493490	929331	1.24279e+06	525988	182362	122452	596397	573702	573839
M210T69			0.516733	2.40833	0.0818742	210.149	68.528	2019.33	1501.82	585.393	450.444	1883.9	1353.24	1766.21	3335.8	1468.63	3344.91	1544.03	7311.19	1714.11	1707.08	2037.9
M635T738			0.323472	2.40798	0.00969178	634.814	738.191	87.079	59.9647	527.733	766.789	1182.64	895.963	1669.75	1753.27	784.232	1059.98	1268.71	1940.55	2978.92	2913.68	2977.97
M339T715			0.462036	2.40664	0.0339965	339.099	714.868	896.077	432.61	701.516	1644.7	902.875	1310.21	3981.08	1976.68	1576.86	3690.41	520.096	2425.16	1796.98	2248.59	1911.55
M929T47			0.442298	2.40616	0.0207004	928.756	46.8125	1129.1	2414.1	258.96	1087.31	587.253	1207.99	2812.55	1806.9	951.638	2628.52	3702.56	4182.27	2359.66	2312.95	2359.62
M582T74			0.525325	2.40611	0.00513548	582.456	73.598	1065.09	631.142	1368.89	796.741	605.766	1694.41	1363.69	3464.03	2281	3027.69	1514.19	3175.93	1879.98	1959.55	1958.16
M802T304_1			0.746335	2.4054	0.0794055	801.617	304.44	3280.2	2106.6	1725.13	1298.24	4507.16	3197.9	5555.37	9072.8	2032.23	5752.66	2201.8	14148.7	3089.07	3477.02	2801.7
M628T672			0.197224	2.39532	0.00988804	627.891	672.496	49.0572	167.384	41.7033	314.746	711.449	209.526	716.687	472.547	514.474	560.163	610.356	704.067	649.896	621.106	621.505
M931T48			0.460895	2.39255	0.0417114	930.704	47.807	1129.08	1964.77	225.258	731.756	559.967	1282.64	2262.15	1544.71	924.765	2992.7	1791.58	4584.54	1297.04	1499.68	1502.76
M564T380			0.757912	2.39191	0.0169427	564.246	379.803	3567.2	3406.18	2137.7	755.945	3023.9	2124.86	5626.14	8839.83	3498.35	9756	2845.52	5350.62	2506.69	2125.53	2497.52
M679T297			1.41325	2.38718	0.0129852	678.504	296.925	10424.7	14494.2	20579.5	11728.2	25919.2	19370.7	46305.6	38404.8	65228.5	12865.2	29463.9	52457.3	18887.5	18892.9	18210.1
M136T1282			0.776962	2.38537	0.0158062	136.111	1281.9	2109.68	8918.7	1507.72	430.466	5901.61	4468.72	5883.13	11937.1	7634.78	11523.9	12995.6	5692.53	3613.6	3011.69	3015.96
M925T48			0.662242	2.37911	0.0497995	924.699	47.937	3310.83	5129.69	326.67	825.008	1514.05	2069.93	4509.12	3141.6	2191.45	6336.09	5017.78	10151.5	4361.96	4201.73	4196.59
M906T48			0.770089	2.37507	0.0311375	905.685	48.096	3565.3	6879.8	831.461	940.698	1101.43	3432.29	6052.77	4316.46	2784.39	10053	6728.34	9849.81	5236.32	5234.07	5346.98
M867T300_1			1.04024	2.37326	0.0271873	866.588	299.788	4484.65	7007.83	11525.4	11046.2	20210.8	15593.7	10714.6	43333.8	42245.3	12450.5	30492.1	26580.3	17235.1	24872.8	17929.7
M690T353			2.04759	2.37187	0.0672035	689.557	353.234	15931	32781	22100.1	17219.2	14669.4	18582.9	60760.3	76128.2	18415.5	91189.7	15319.8	25855.6	55914.7	64771.7	55711
M801T313_2			1.38565	2.36871	0.0225106	800.578	312.65	11765.3	13875.2	8254.15	6613.38	6741.57	13076.6	8544.31	18207.7	17022.9	32106.6	24501.2	42512.5	15737.4	15098.9	15345.9
M229T803			1.13405	2.36689	0.281941	228.977	802.51	32436.5	2063.41	2005.09	9262.52	1762.05	597.521	45646.9	743.26	2220.67	27144.1	1282.01	36874.9	20632.3	21370.2	21357.7
M958T48			0.52701	2.36639	0.061287	957.719	47.7395	2229.55	2218.64	304.112	339.398	1119.27	1480.25	2077.52	1935.03	1691.76	4801.4	1766.19	5928.52	2936.16	2733.36	2937.16
M532T61_2			0.11147	2.36268	0.475862	532.382	60.649	7684.44	7359.76	2299.81	22393.6	7303.65	2319.84	5033.89	1583.42	4045.74	3767.98	93433.4	8760.2	1120.75	2504.74	2506.65
M289T74			0.652891	2.35859	0.0712412	289.177	74.3505	2464.56	285.449	922.833	281.726	7006.2	2333.68	5667.85	879.373	5154.68	8912.47	4400.91	6340.86	5476.94	4815.9	4865.17
M664T70			0.184754	2.3538	0.421624	664.461	69.728	7360.28	8830.63	1582.65	16686	6476.84	3143.52	4696.23	3784.96	4777.2	3059.39	75247.2	12190.1	2570.05	2216.15	2217.86
M577T49			0.656754	2.34701	0.291976	577.445	48.931	5047.29	5661.39	4021.68	2363.07	2287.29	1459.49	28720.3	2904.58	2863.66	5104.27	3217.93	6101.47	2800.23	2662.16	2660.85
M974T48			0.459262	2.33096	0.0243594	973.714	48.113	1892.98	2031.24	157.632	458.789	625.104	1324	1925.82	1307.35	1883.45	3588.8	2354.81	4067.1	1536.2	1535.05	1455.95
M805T277			2.85626	2.32713	0.0374182	804.551	277.377	16110.1	19483.4	39164.5	64467.9	47217.9	120619	91508	168373	102227	59343.3	82874.3	210247	76967.2	88805.1	77620.1
M710T673			0.19346	2.32688	0.0168321	709.896	672.78	325.45	100.707	9.7793	380.686	205.477	346.397	616.009	349.475	203.393	583.098	666.405	765.951	703.912	645.579	645.552
M425T888			0.699955	2.32464	0.0367983	425.078	887.774	2211.23	5440.33	1638.12	1948.17	838.541	1377	2273.85	3254.33	6720.73	4569.31	9343.85	5112.25	2778.87	3157.39	3146.48
M901T691			1.25904	2.32323	0.0112181	900.97	690.862	7552.72	10881.4	8318.96	11800	9311.55	21567.6	33227.3	32336.3	41977.1	24180.7	15629.8	13955.7	11279.6	11256.7	10250.3
M310T778			0.812718	2.31483	0.0356894	310.076	777.83	1451.59	3097.5	3318.11	1959.56	1640.2	4509.02	3779.44	5317.98	4111.21	7844.98	3749.97	12178	3075.97	3330.07	3328.23
M596T793			0.42496	2.31408	0.0622917	596.039	793.167	323.203	423.545	906.598	1171.58	1152.3	1529.99	953.636	2076.87	1887.91	2339.56	928.798	4557.35	1123.05	1143.4	1123.54
M704T352			7.35421	2.29595	0.0525936	703.573	351.539	234180	293925	357717	270506	346495	284938	846104	1.27879e+06	317849	1.0351e+06	277155	349623	1.30106e+06	1.08707e+06	1.08378e+06
M692T184			0.371005	2.29475	0.148964	692.462	183.528	471.07	93.9364	1531.45	969.875	1767.12	894.885	517.104	5643.34	2492.41	908.751	1828.16	1755.32	917.159	967.481	966.768
M669T674			0.66226	2.29151	0.121597	669.119	674.407	3829.66	1303.85	1079.37	3732.05	2247.66	1325.05	7632.89	5494.93	1780.33	1363.19	2921.07	11783.4	981.683	1105.19	1072.25
M231T102			4.25778	2.29139	0.217884	231.044	102.07	108152	50092.2	254664	6304.67	83779.7	160889	106514	725568	94254.2	339290	68976	186610	151352	151307	119202
M891T48			0.505131	2.29079	0.0298222	890.695	47.923	1966.55	3102.03	398.603	787.798	708.811	957.711	2723.89	1641.78	1701.89	4421.6	2999.93	4657.42	2261.04	2490.12	2263.12
M926T47_1			0.770093	2.2861	0.0421378	925.708	47.466	4622.9	6419.49	652.589	1211.19	1304.72	4392.95	6262.46	4777.41	3034.58	8533.53	6868.72	13053.6	4985.73	4981.44	5015.95
M132T877			0.718032	2.2841	0.0310575	132.076	876.973	1506.61	3588.21	2434.1	2424	3877.66	3301.59	2481.21	3931.41	6915.14	9045.83	4934.28	11823.7	4704.16	5215.63	5212.9
M588T676			0.394279	2.28345	0.0916059	588.117	675.572	832.886	628.836	606.988	1370.69	847.194	482.312	2984.54	1803.89	822.814	422.712	1118.7	3736.91	422.202	470.574	435.645
M895T48			0.642314	2.28332	0.0108332	894.729	48.007	1969.16	3788.91	782.572	1521.13	1759.78	2476.19	4811.48	3690.15	1865.87	5984.16	4704.54	7023.48	3917.58	3724.57	3905.18
M813T372			0.502936	2.28127	0.0320383	813.399	372.015	634.487	74.1904	1305.09	2106.5	2052.74	1193.83	3519.37	880.641	1446.03	4035.03	3911.33	3013.36	2813.37	2722.42	2625.08
M120T65			3.5142	2.27893	0.0174262	119.976	64.518	33407.4	18034.7	112743	11358.6	72344.2	108599	156291	123353	97695.3	222403	109817	102850	176173	188705	188312
M622T788			0.38711	2.27457	0.0716273	622.208	788.416	813.537	1209.63	1102.1	4175.34	1585.59	6828.94	9321.39	2369.61	8867	2278.03	8316.47	4592.76	9132.47	9584.68	9386.6
M804T673			0.162427	2.27038	0.00557127	803.879	672.628	9.93769	91.8764	27.357	305.306	333.854	354.55	411.224	439.028	421.408	445.217	473.905	358.58	371.837	346.964	346.628
M257T54			0.731236	2.26886	0.0448916	257.06	53.878	949.653	5291.88	2466.1	533.165	1596.06	2443.09	2881.68	6792.81	2999.07	8354.15	2639.92	6462.76	2799.42	2728.92	2728.53
M381T671_1			0.176949	2.26287	0.0364586	380.874	671.372	41.3561	12.4591	45.2808	309.495	519.925	399.33	697.801	348.586	254.199	447.015	564.174	692.964	792.024	762.267	790.289
M1178T639			1.54145	2.26284	0.0322977	1178.04	639.417	7829.41	6461.59	12380.3	14975.5	13419.5	13787.5	26146.9	22664.8	37473.2	14942.4	8691.08	45886.8	9231.04	10317.4	10330.4
M966T48			0.475665	2.25923	0.0243197	965.701	48.096	1680.54	3055.16	470.193	860.399	901.307	1046.18	2951.15	1958.06	1183.78	3567.1	4038.94	4405.93	2505.03	2503.4	2521.52
M361T51_2			1.18081	2.24095	0.404764	361.312	51.123	5045.8	3504.52	5359.96	4867.78	1994.9	48524	1054	1390.95	1210.37	12297.8	51618.9	87719.3	7278.57	24963.5	25006.1
M321T77_2			1.49392	2.23924	0.428993	321.165	77.0795	1329.34	3521.57	134531	647.75	2483.61	2066.21	1362.46	1040.03	167857	111820	2818.56	38850.2	74107.3	74738.5	76040.5
M423T675			1.80353	2.23896	0.114054	423.11	675.437	24479.9	9004.46	11248.9	31025.8	23155.8	7655.21	74245.2	30333.6	14067.3	11897.6	29001.9	79060.8	10753.1	11700.5	11716.6
M505T675			1.06102	2.23768	0.0852755	505.113	675.238	6305.61	4254	4291.26	9745.3	7417.14	2886.41	21548.1	12248.9	5617.15	4150.78	8546.67	25982.8	3593.55	3803.8	3804.88
M943T47			0.485188	2.23554	0.0237331	942.737	47.361	1404.49	2550.49	339.665	661.136	845.49	1161.99	3007.05	1730.3	1668.3	3402.66	1636.83	4121.56	2416.67	2398.96	2553.74
M781T281			5.39541	2.23405	0.0120093	780.551	280.814	45666.1	56220	267064	208705	286229	373262	340770	351207	731122	473956	334030	532764	226657	226323	178378
M338T778			0.391648	2.23391	0.0675588	338.049	777.68	805.19	661.438	676.902	2198.09	798.081	1991.66	3537.69	3111.69	3183.23	1003.86	444.651	4649.71	974.166	909.148	1026.05
M403T795			0.515324	2.23208	0.130377	402.986	795.311	2109.7	1673.96	2500.4	686.944	1941.41	3983.27	894.102	1590.13	9454.77	2974.36	9373.26	4497.54	1796.74	1896.31	1891.76
M1015T642			1.2948	2.2309	0.0813073	1014.53	641.889	1870.53	7383.15	6634.1	10202.8	8541.06	11103.3	7988.64	29808	5500.1	24632.7	6720	27380.8	7545.47	7060.17	7075.07
M708T71			0.0911596	2.23067	0.480112	708.489	71.4905	5036.43	6438.23	2182.3	13153.7	4282.58	1103.6	2532.57	2092.94	2618.95	2008.15	55994.6	6573.26	1899.07	1897.81	2088.26
M807T261			9.99339	2.21781	0.039298	806.568	260.966	141015	221514	1.52263e+06	1.30345e+06	132311	815281	1.27399e+06	1.26201e+06	1.39643e+06	2.76021e+06	1.16392e+06	1.31673e+06	1.10314e+06	1.08714e+06	940258
M876T47			0.603691	2.21636	0.00520185	875.707	47.368	1159.77	3625.59	808.395	1143.06	1890.1	2366.63	3565.35	3951.84	2790.1	4753.37	3379.5	5925.48	3591.91	3586.99	3062.26
M333T39			1.36723	2.21603	0.41189	333.005	38.5745	36406.1	36268.5	18929.6	18685.1	14372.5	2930.43	27139.9	33316.5	194173	5895.25	9840.94	12382.7	3045.31	3005.77	2975.46
M120T99			5.33712	2.21602	0.00672431	119.975	98.727	197707	67705.6	254604	28807.3	146719	20556.3	302292	228997	230462	277398	321476	226264	305244	327832	327656
M956T49			0.436552	2.21002	0.0937011	955.685	49.216	1790.68	1822.86	98.9552	475.298	364.92	1606.59	2310.97	1469.93	674.344	2785.67	1572.41	4798.81	1596.88	1597.18	1669.4
M476T161			1.10042	2.20812	0.180247	476.306	161.274	17003.4	10102.5	28802	12097.7	24008.1	38947.3	21823.7	108070	99891.6	16393.5	16057.9	26941.1	8443.33	8389.31	9095.25
M731T112			2.13846	2.20577	0.115059	730.536	112.069	21779.2	25148.4	75269.7	130856	105536	169845	124245	132485	473047	103894	169099	162831	91957.7	89767.8	89694.2
M912T48			0.557587	2.20437	0.0231451	911.726	47.9635	1711.7	3538.19	315.436	1267.56	1340.86	2110.96	3814.03	2397.94	2298.14	4293.1	3352.1	6515.98	2677.83	2571.78	2682.53
M549T302			0.732994	2.2017	0.0393138	549.328	301.822	1056.56	781.999	3173.08	543.2	3321.29	6002.09	3147.33	4158.42	3836.72	7252.92	5395.19	8966.78	3554.97	3331.96	3308
M730T311			0.587916	2.20089	0.0177819	730.212	311.134	628.575	2252.15	1713.07	1751.57	3271.82	3229.64	3577.02	2784.67	6634.57	5237.26	2733.36	7307.53	2325.16	2369.48	2326
M783T224			7.51769	2.19937	0.146192	782.568	223.806	133758	134509	218906	121364	323140	2.79541e+06	1.19489e+06	888658	2.1915e+06	1.12413e+06	1.34386e+06	1.45421e+06	1.1303e+06	1.11569e+06	1.11601e+06
M751T674			0.402246	2.19855	0.184619	751.118	673.957	1138.45	522.771	757.977	1581.04	1170.02	327.574	2520.01	2175.16	811.938	376.048	870.459	5333.65	429.229	480.723	434.907
M335T43			0.239075	2.19526	0.482775	335.021	43.364	9043.06	9855.16	2087.57	2315.86	3466.57	676.244	3100.32	5036.71	46522.1	314.652	1252.64	4021.41	473.608	449.987	449.426
M533T75			0.768282	2.19351	0.0023917	533.454	74.699	2753.29	2381.53	757.6	2094.8	2258.76	5443.41	4020.02	6344.12	5145.98	6346.09	5434.46	7124.2	5726.94	5842.9	5842.49
M285T74_1			0.348802	2.19271	0.411248	285.075	73.665	17395.8	7935.32	3127.63	1981.48	8580.51	898.86	5123.53	11961.5	58495.8	1277.09	3294.98	7379.3	1707.96	1712.34	1712.34
M195T856			0.591036	2.19039	0.0643552	195.002	856.41	4329.49	7600.01	5575.18	3602.48	6742.03	7975.47	4897.37	5720.91	24654.4	7898.98	20035.1	15263.2	4967.01	5059.31	5056.81
M365T585			0.684255	2.1881	0.207304	364.903	584.822	260.807	7743.47	15263.4	13907.6	21649.9	15400.3	57477.5	7174.85	12296.8	15634.9	62285.8	7543.12	15263.6	17071.6	15225.3
M924T47_1			0.804199	2.18434	0.0528623	923.695	47.472	5745.05	7518.75	1133.58	1108.09	1900.24	5320.16	6536.93	4348.36	3752.77	11425.7	9155.13	14422.2	5789.72	5789.71	5767.69
M761T222			3.65896	2.18173	0.00728969	760.583	222.223	40827	60392.5	73689.8	71011.7	91108.7	77497.3	116599	146198	121770	236063	83413.8	200343	80511.4	80423.9	89968.5
M367T585			0.406464	2.18069	0.197296	366.901	585.091	71.2134	2905.12	6042.57	4786.6	8553.79	5460.01	20150.6	3132.4	5125.29	5466.05	23688.8	3102.27	8198.06	8206.93	5754.6
M152T74			0.266818	2.18064	0.0320897	152.106	74.117	469.593	517.482	1000.94	641.121	1289.55	862.822	1088.39	1775.94	3443.3	1569.54	1309.86	1239.72	1244.82	1307.7	1246.05
M271T79			1.25487	2.17914	0.0101459	271.206	78.678	8092.02	6737.12	7394.79	2144.69	6865.32	10656.3	15008.3	22081	6477.07	19844.7	11029.8	16844.1	3750.86	8134.81	4847.31
M652T836			0.436335	2.1769	0.337957	652.078	836.038	1135.47	2354.1	1313.06	330.006	1123.22	1008.52	470.28	725.949	1530.06	622.235	3191.02	9274.26	801.999	822.242	822.173
M111T54			0.21517	2.17584	0.226946	110.958	53.5655	602.204	406.882	257.788	277.986	232.333	2478.68	2931.56	313.013	2542.21	110.704	2732.63	629.961	452.766	554.96	998.035
M285T673			0.38293	2.17558	0.28212	285.04	672.99	848.842	3104.67	1413.84	6746.69	349.587	499.865	6366.26	678.8	899.299	222.465	7837.57	12198.7	4567.73	4399.71	4399.19
M483T675			1.61444	2.1741	0.121592	483.132	675.27	19392.3	6968.46	10279.6	26842.1	16712.1	7184.35	52550.3	27204.4	9207.43	10199.1	23529.4	67280	8725.47	9136.09	9428.7
M471T53			0.384619	2.17126	0.0414656	471.344	52.7	3700.92	2681.09	2259.47	2094.33	1581.96	1546.1	5244.26	3595.73	4354.94	2571.09	10267.2	4068.87	3703.76	3695.54	3232.82
M170T795			0.308663	2.17027	0.0696944	170.465	795.314	621.487	582.773	585.745	266.683	920.526	964.34	596.63	567.727	2753.28	1040.51	2221.66	1374.42	598.377	593.633	633.552
M755T283			2.63344	2.16889	0.0181591	754.536	282.755	9705.62	11936.7	65751	69627.3	73554.8	85068.4	81482.4	92740	159843	81894	93409.2	175228	77354	78234.3	78235
M783T262			7.24564	2.16623	0.0702923	782.567	262.005	101760	104045	156280	208550	611797	1.02406e+06	559411	431855	937377	716122	692300	1.44271e+06	534771	432252	530534
M205T58			1.36006	2.16588	0.459302	204.981	57.601	49298.3	18724.4	12988.6	33617.5	28237.9	4852.63	20043.7	22771.6	236420	4865.91	13308.1	22532.8	4799.26	4798.85	5352.03
M497T567			0.21021	2.16583	0.157806	496.867	566.957	449.602	243.883	216.659	321.076	227.514	326.011	1438.78	328.134	289.62	202.003	353.091	1253.82	457.142	386.619	764.731
M705T779			0.765064	2.16286	0.0597089	705.243	779.086	1975.75	4464.61	2512.18	3893.9	2286.63	3974.23	1873.67	7378.75	4955.74	10730.4	3806.94	12580.9	5649.17	6604.78	5498.85
M790T77			0.842515	2.15806	0.0832733	789.521	76.541	6229.6	3823.75	3552.52	4060.37	2329.57	4514.46	6456.9	7723.44	5411.55	9737.22	3525.21	20040.3	5737.11	5852.56	5876.18
M693T673			0.235838	2.15575	0.0123277	692.854	672.585	43.4304	104.267	486.97	332.748	730.135	625.202	1168.95	610.482	548.411	952.961	830.407	896.075	1069.44	1028.19	1069.45
M352T262			0.940107	2.15485	0.00366679	352.054	262.324	2584.2	5158.08	2929.78	3500.88	4144.4	4934.11	9106.61	5735.73	8095.16	11090.7	4753.09	11322.2	4580.8	5413.41	5155.36
M866T47			0.570073	2.1542	0.0318535	865.688	47.472	1707.45	4536.08	736.728	1093.69	1436.73	1753.9	3266.51	2554.71	2259.02	5866.47	4256.19	6063.24	3196.06	3255.73	3350.95
M487T722			0.762614	2.15334	0.271542	487.176	721.522	2016.33	1967.88	2116.99	2468.25	2749.2	6766.01	3214.08	3620.6	2631.65	7309.23	1765.95	20401	3847.49	3276.96	3264.05
M900T48_1			0.730059	2.15109	0.0638405	899.695	48.007	3431.82	6734.98	744.686	819.552	1910.42	4066.45	5941.38	4098.45	2352.99	8524.63	5625.81	11548.1	3989.36	3781.54	3817.03
M413T328			0.532998	2.14622	0.0294887	413.268	327.718	1422.72	1502.56	6602.94	2213.63	3765.92	846.582	8977.08	4214.94	7987.9	4944.8	3846.45	5128.88	3265.21	2894.83	2906.84
M752T72			0.291224	2.14559	0.39514	752.484	71.507	7781.41	2940.62	3727.63	16343.2	7529.82	9895.09	5028.9	4155.44	3415.45	12427.4	67527	10901.3	3814.71	4464.81	4486.53
M427T943			0.585707	2.14516	0.0225622	427.095	943.197	3075.18	3717.69	2103.95	3130.51	2092.22	3022.33	2809.4	3830.49	4893.96	9841.37	9384.07	6012.86	3068.24	2247.56	3062.27
M277T73			0.827901	2.14456	0.4417	277.18	73.246	13048.7	5572.05	10007.7	27024.4	9411.68	13508.3	11502.7	120232	8524.29	6413.19	7715.19	14116.8	7363.65	7437.87	7438.56
M143T68			0.683047	2.14416	0.00171767	143.07	67.776	2300.75	2582.5	1595.17	826.004	1538.41	3095.94	2965	3898.63	4303.23	5039.22	3585.3	5807.29	2697.59	2529.13	2697.74
M387T314			0.31921	2.14386	0.0663709	387.006	314.321	71.6451	229.019	641.115	746.45	739.169	985.146	553.814	1493.96	911.551	1387.67	587.867	2381.15	1362.99	1481.57	1370.92
M246T73			0.993061	2.14309	0.0277682	246.115	73.054	3748.13	10512.8	5389.49	3716.06	4638.68	6093.21	9847.16	17225.2	6947.12	10181.2	7859.34	21015.9	5847.22	6064.99	6066.67
M717T365			0.367055	2.14162	0.103116	716.54	365.06	849.435	891.281	980.019	860.454	990.735	454.838	1335.83	1047.65	1105.92	4325.52	983.057	1967.46	1403.03	1118.57	1148.11
M582T334			0.675477	2.14062	0.000610524	582.235	334.409	2140.86	1486.17	1773.85	2720.52	2402.77	1439.51	4970.52	5986.96	3469.11	3666.11	4011.99	3504.96	3304.77	2945.86	3303.63
M885T48			0.592555	2.13996	0.070658	884.703	47.552	1699	5306.46	446.271	778.035	1618.69	2544.82	4104.27	3460.88	1436.21	4953.25	4263.85	8302.7	3733.03	3509.12	3741.44
M757T86			0.446178	2.13732	0.0687295	757.143	86.239	906.136	476.794	2139.87	1631.08	1838.33	1534.56	1554.94	900.02	3622.97	5951.24	2280.99	3914.31	3019	2918.29	2914.98
M721T293			0.95232	2.13382	0.226018	720.55	293.347	2925	4279.82	10269.5	4403.31	5699.39	11769.9	7803.72	8242.91	9074.88	8331.94	8662.58	41843.3	9587.31	9469.12	10569.9
M585T73			0.885308	2.13115	0.00563872	585.484	72.644	3397.96	1703.44	4559.29	2372.49	2794.87	6664.14	4663.34	9766.84	7297.13	8372.99	5641.67	10061.1	6803.98	7444.13	6804.58
M932T48			0.393404	2.12499	0.0551259	931.699	48.1045	1074.85	2251.35	79.4669	1000.4	739.473	940.738	1584.33	894.597	1351.13	2961.54	2394.28	3747.4	1561.31	1831.04	1572.55
M760T82			0.697181	2.12493	0.0189559	760.492	82.201	1645.65	1965.5	2146.57	2891.8	1384.46	4195.58	3000.59	2955.76	4009.45	6840.3	5374.05	8056.66	4777.85	4337.46	4778.84
M391T427			0.248078	2.12427	0.0905176	390.965	427.056	479.906	218.105	486.038	581.029	213.266	524.819	1967.8	357.481	355.71	953.258	760.575	922.569	999.309	1114.46	998.625
M722T786			0.357769	2.1215	0.00924018	722.14	785.858	413.571	567.801	504.593	532.422	1251.95	1192.08	1951.49	1421.78	1653.11	1932.33	616.859	1891.4	1296.76	1321.28	1296.68
M241T1319			0.489589	2.12115	0.0689321	241.217	1318.62	1771.85	1598.86	1992.32	1373.44	1145.96	1797.27	2183.76	3233.77	1590.44	6980.85	4934.24	1609.07	2314.68	2293.61	2093.13
M942T48			0.585204	2.11732	0.0594724	941.705	48.06	2850.8	4008.57	433.026	284.335	1302.91	2732.11	3169.7	3190.74	1331.12	6471.73	4106.27	6316.27	3189.42	3092.82	3188.98
M946T48_2			0.36754	2.11521	0.0264751	945.753	47.581	591.02	2121.85	308.969	430.43	1003.72	823.545	1737.17	1105.02	1126.41	2276.62	2260.42	2661.69	1680.92	1677.82	1737.86
M248T839			1.05868	2.11379	0.136622	248.065	838.849	3970.4	5508.57	5607.36	8239.02	6312.02	8814.57	8640.21	11803.1	5887.4	15579.7	5512.59	33856.4	10850	11607.5	11582.6
M559T776			0.820789	2.11083	0.0478487	559.175	776.398	1593.88	2613.95	3025.28	9380.29	4727.5	4547.41	5253.57	13688.1	8561.69	13932.8	3009.38	10200.2	6683.92	6635.98	6535.09
M590T876			0.251252	2.11046	0.0183557	590.073	876.383	308.259	731.571	747.253	290.606	794.073	628.068	446.894	1159.14	1702.51	1788.31	1432.27	857.133	1127.48	1152.97	1152.97
M1172T690_1			1.59916	2.11043	0.0621425	1171.53	690.355	11204.6	31786	19245.9	18008.4	34355.9	26156.9	33400.6	89853.5	68450.9	63752.9	28831.6	12769.6	35593	35588.6	28987.9
M353T573			1.28971	2.1067	0.515036	352.866	573.284	1660.54	867.642	971.786	1000.73	155679	590.606	1289.54	938.307	860.927	145352	189659	594.156	62666.5	77326.5	8947.26
M327T909			0.307579	2.10506	0.253212	327.058	908.505	945.154	1137.95	523.661	695.786	689.032	875.299	765.18	906.522	701.705	874.038	1695.46	5302.17	827.514	833.835	827.47
M329T277			2.89628	2.10089	0.0996188	329.233	277.074	58260.9	125873	25203.4	12401.6	27830.9	50161.2	58302.8	49632.4	52326.2	136705	202743	129992	42719.3	43167.9	43401.9
M954T49_2			0.486831	2.09806	0.0754041	953.669	48.598	2416.27	3138.5	384.176	86.8539	914.467	1415.28	2058.41	1868.06	1468.55	4537.12	2645.32	4952.97	1675.95	1673.34	1536.07
M821T311			0.974338	2.09517	0.00894199	820.544	311.049	5430.42	5394.66	10748.3	2503.93	8120.86	6876.07	7472.74	15857.1	13571.3	12159.4	11595.5	21211.3	11641.6	11672.8	13056.7
M651T849			0.462674	2.08726	0.331349	651.096	848.893	1277.89	2748.56	1621.87	446.404	1067.22	1404.05	688.753	1069.56	1356.36	926.274	3783.77	10054.7	652.06	652.542	668.126
M911T48			0.661661	2.08685	0.0623068	910.719	47.937	2500.44	5726.12	540.84	1779.36	1547.57	2989.53	4608.44	3843.23	2053.17	7149.97	4338.49	9484.4	4369.2	4368.16	4417.05
M583T73			0.690449	2.08045	0.00891275	583.467	73.3	1314.21	1590.14	3890.29	1320.67	2000.27	4591.47	3940.45	7496.89	4850.27	3790.11	4554.94	5964.62	4563.58	4805.6	4629.53
M722T375			0.397599	2.07925	0.198376	721.575	375.489	929.746	878.386	625.697	757.861	1338.53	2046.27	693.521	746.108	2543.58	5957.61	880.975	2852.38	2021.07	2073.39	2510.39
M469T222			0.529767	2.07518	0.262323	469.363	222.129	70.2984	39.6553	2390.19	7059.97	1913.37	2235.52	540.293	4657.63	1338.34	12179.4	7191.47	2541.43	3038.67	3040.63	2950.64
M757T83			2.64048	2.07408	0.315476	756.551	83.4735	55518.1	43661.1	103421	16564.7	143567	77798.5	43749.4	32733.9	263949	57981.4	48894	466386	49839.3	50456.8	49820.6
M151T73			0.309578	2.07023	0.101137	151.073	72.9695	656.366	613.053	1177.55	233.29	754.21	74.468	749.355	1965.79	720.576	1791.49	181.672	1855.42	1164.4	883.208	743.009
M901T48			0.597226	2.06853	0.117471	900.702	47.9635	2180.79	5415.1	508.34	1180.65	1971.19	2164.91	3631.78	2897.8	1904.27	5637.83	3538.98	10151.1	3196.11	3149.25	3196.2
M387T732			0.4975	2.06617	0.122073	387.086	731.779	3201.79	1391.77	1518.27	3754.25	2674.98	963.958	6980.3	4845.78	1283.04	1778.7	3167.09	9848.73	1600.3	1599.79	1638.05
M554T801			0.305593	2.06414	0.113282	554.147	801.139	1108.46	845.395	659.78	411.164	353.344	1101.33	679.8	864.21	3567.32	935.548	1780.52	1418.87	487.115	487.737	574.251
M485T786			0.551019	2.06409	0.0122923	485.102	785.848	1416.05	1450.77	1632.16	2067.34	3112.71	1181.19	3489.94	3866.32	3658.73	4709.45	1325.04	5367.02	3126.58	3785.29	3790.16
M327T586			0.161115	2.06318	0.173143	326.945	586.218	90.0839	718.069	990.076	591.187	895.308	895.234	2626.35	449.487	859.667	835.716	3256.96	595.844	2577.83	2231.44	2216.53
M696T49_1			0.597436	2.05959	0.0249437	695.559	49.227	3885.37	5506.81	2667.15	3130.09	3271.45	1406.68	8837.87	7481.86	3103.4	6314.02	11068.9	4113.07	2173.39	2170.26	2067.94
M450T74_1			0.536317	2.05813	0.227192	450.232	74.117	1333.5	1686.47	1916.21	19594.7	4277.72	4215.24	1415.81	21724.9	7624.37	2695.57	18531.9	15974.9	11326.4	11340.2	3309.24
M905T47			0.358573	2.05788	0.0418814	904.754	47.361	392.469	1555.97	477.798	833.436	390.173	1492.04	2630.35	1231.18	584.336	1881.11	1703.49	2550.92	1760.18	1649.43	1650.22
M796T61			0.156556	2.0557	0.274817	796.466	60.684	1116.41	364.219	1729.71	2126.86	320.67	517.752	444.273	2612.45	503.704	2276.06	6123.06	735.662	633.937	1015.29	646.046
M919T47			0.455612	2.05532	0.0654491	918.739	47.301	1803.41	2169.52	421.342	752.202	751.652	1949.58	2601.74	1734.28	1390.11	2932.22	2047.61	5423.63	2907.68	2907.46	2841.25
M363T38			0.90374	2.0553	0.3841	363.015	38.281	14468.2	20057.1	8271.6	2729.49	7729.14	2222.53	11798.5	13843.6	70044.3	2865.28	5490.13	9982.46	1629.84	1835.88	1623.76
M154T179			0.645486	2.05468	0.401127	154.036	178.89	1068.62	850.193	2949.41	20672.5	2523.51	28182.2	42963.2	1440.45	58398	2710.75	2519.93	7536.45	9909.47	13129	13069.2
M230T305			0.429898	2.05141	0.19699	230.174	305.014	1171.01	647.23	486.757	1964.18	2527.25	4612.23	1602.78	3711.5	7626.28	1636.26	804.072	8022.92	1104.53	1033.44	1403.24
M845T368			0.824338	2.05124	0.1389	844.659	368.104	5478.62	2438.7	5139.08	6682.11	10578	7827.37	13061.9	5311.66	6988.64	6685.1	14688.3	31506.8	13942.8	13048.7	13952.1
M364T729			0.273149	2.05109	0.212855	363.947	729.024	800.814	654.237	554.349	715.469	928.847	379.657	1923.32	1096.04	648.881	413.02	451.864	3739.68	551.763	552.522	500.807
M311T803			0.478037	2.05042	0.165765	310.993	803.041	1103.36	2753.9	3236.73	1686.1	2537.38	1079	719.861	3194.54	9161.48	3133.82	7759.22	1449.09	1686.99	1710.04	1934.91
M151T498			0.775818	2.04787	0.190475	150.979	498.469	1823.43	1817.63	1494.1	2026.28	1974.84	11198.7	8057.31	7451.01	1592.28	9330.5	1212.46	13999.9	3383.76	3369.62	2228.52
M275T361			0.244385	2.04769	0.369726	275.027	361.487	1116.81	571.023	904.931	1145.61	873.281	618.513	917.111	1321.97	6574.12	670.707	313.875	911.984	431.767	373.25	370.413
M731T310			2.4386	2.04741	0.0447451	730.536	310.018	82757.3	51697.3	32181.7	38704.6	59352.1	48890.3	63048.8	93948.9	138187	65705.7	75466.3	205678	51598.7	52910.7	51604.1
M197T78_1			0.697846	2.04493	0.00905534	197.118	78.286	1364.65	4037.97	2324.99	1848.54	1891.61	2732.11	3282.72	3030.18	5278.27	5188.49	4742.28	7515.73	2680.68	2266.83	2658.47
M140T582			0.423046	2.04414	0.0589924	140.046	581.785	527.167	967.869	1870.83	1100.7	1024.93	1188.8	834.071	3391.9	1706.45	3100.33	960.23	3662.47	6388.97	6389.44	6433.4
M278T72			0.43255	2.04155	0.258669	278.179	71.845	354.569	780.382	5721.17	3605.34	731.239	1247.08	7099.62	596.221	4597.64	2022.24	802.999	10277.7	1110.75	2653.51	1633.12
M790T78_1			1.67175	2.03883	0.0652572	789.557	77.987	22003.7	17592.9	20859.2	31970.1	18535.6	13210.8	74761.6	17207.5	32952.3	67996	17701	42548.3	62565.2	62251.6	17271
M271T795			0.60539	2.03822	0.0754466	270.931	795.174	1360.54	828.001	1849.06	2734.35	2778.41	5395.8	1856.49	3565.67	6238.96	2667.46	7696.41	8438.5	5649.71	4756.14	4680.86
M328T49			1.02244	2.0358	0.210817	328.257	49.274	9108.95	4736.51	6996.75	5459.34	36585.1	30920.1	1868.82	2554.55	42277.9	26056.5	60413.1	57801	17476.6	17479.6	5249.41
M384T66_1			0.531365	2.0354	0.00600915	384.204	65.708	2897.26	2992.97	1442.41	1927.41	3003.79	1344.82	3419.22	5995.87	5775.1	5686.94	4382.43	2439.51	1766.52	1767.45	1626.89
M627T672			0.259364	2.03101	0.0156593	626.882	672.412	29.7795	162.09	846.291	418.177	746.933	635.454	1190.45	803.277	680.772	1032.64	766.831	1291.5	1191.97	1170.51	1170.07
M519T831			0.387699	2.03092	0.00188003	518.845	831.178	1275.61	534.386	467.612	527.005	845.495	837.396	1597.66	1902.89	1253.79	1897.69	1323.68	1138.07	817.121	805.331	882.497
M127T167			0.805553	2.02753	0.0983744	127.112	167.198	3180.98	2211.71	4378.22	497.537	14623.8	8140.96	10725.5	8387.53	9947.83	7269.05	22294.9	8350.98	5550.78	5674.13	5556.22
M120T133			3.16268	2.02394	0.286198	120.038	133.424	406.839	412.49	208526	631.711	1111.19	159285	183351	179851	546.565	224796	1128.4	159941	186706	198643	198110
M214T837			4.64125	2.02004	0.277573	214.126	837.256	4614.38	3399.62	1086.32	429931	2350.7	412096	415816	419619	1252.25	446010	1844.39	439517	431450	437084	431411
M331T300			0.476136	2.01985	0.108856	330.918	300.187	1070.48	897.986	1490.22	1199.6	4149.41	979.818	3730.18	6054.52	635.137	4620.69	2913.97	1814.85	6955.83	6223.44	6272.46
M118T535			1.03061	2.01864	0.506977	118.121	534.817	2840.67	2584	3266.33	26498.9	1125.41	1711.63	519.918	179.244	1021.49	20323.4	2662.03	52056.7	1208.74	1207.27	1397.89
M568T876			0.302513	2.01651	0.0281304	568.091	876.43	740.233	1467.42	1226.18	431.671	1556.96	1375.62	686.175	2160.8	3440.11	2654.59	3083.79	1682.95	2245.6	2246.99	2376.14
M200T1202			2.64288	2.01541	0.130673	200.119	1202.39	36721	74305.5	73215.1	66239.1	66531.9	68442.9	71416	226072	134993	36708	262452	45210.8	65328.4	39767.8	65025.3
M447T302			0.420347	2.01289	0.186457	447.091	301.615	1913.11	1417.5	1696.04	1235.71	1944.01	2825.27	9904.24	2264.39	3444.17	1845.2	1237.38	3510.13	2204.08	2189.77	2427.1
M279T58			0.255121	2.00796	0.484807	279.195	58.317	8416.96	13631	5237.9	2149.82	5712.57	5321.28	4931.07	2997.64	59672.6	4962.7	3331.59	5365.41	4255.17	4300.9	2479.12
M234T95			0.560944	2.0069	0.138433	234.06	94.625	2902.04	2461.67	1855.99	2778.14	440.452	2680.61	3429.26	9715.93	2136.5	6343.12	731.171	3972.35	2337.03	2649.56	2660.86
M253T75_1			0.786092	2.00576	0.0756197	253.107	74.531	3232.28	1589.86	12246.7	3246.3	3865.93	6274.42	15510	5643.44	6057.05	12302.4	16011	5562.56	5769.56	4986.49	5761.82
M892T48			0.690589	2.00572	0.0800728	891.704	47.632	2929.1	9077.81	342.108	1559.91	2141.83	2891.2	5992.4	4588.09	2385.24	9017.68	7135.3	8873.59	5649.83	5607.96	5608.02
M862T86			0.553691	2.00533	0.0861652	862.48	85.994	711.284	1949.8	477.035	3214.97	500.575	5229.09	1166.36	2706.51	4367.31	5039.06	4949.99	6000.73	2505.93	1476.84	1590.61
M595T780			0.442995	2.00339	0.0332001	595.151	779.71	1082.17	813.786	2144.79	3341.38	4283.27	3675.35	8264.61	4704.05	3082.82	3489.18	7154.05	4038.75	3831.76	3379.24	3452.5
M213T180			0.634426	2.00137	0.152596	213.149	179.97	2808.13	1955.53	1276.15	3465.46	10011.8	2761.39	9711.34	10557.2	1209.35	11101.3	11068.7	939.523	11353.1	11513	11353.6
M445T79			0.590294	1.99998	0.0312727	445.293	79.255	2510.3	3434.72	983.042	1985.64	1496.81	2508.12	2929.89	3094.48	7167.74	2290.39	5995.09	4359.37	2446.1	2097.41	2459.63
M305T184			0.327356	1.99909	0.229622	305.13	184.289	477.464	2447.99	536.695	922.359	715.299	295.17	1148.58	4913.71	1260.27	1220.13	1203.51	1038.86	935.439	935.409	997.674
M723T179			1.56396	1.99178	0.179569	722.511	179.406	4926.13	2800.92	14492.1	47174.9	17531.6	18040.3	7474.22	76237.6	11828	31944	41469.9	40115.4	17328.8	17087	17082.7
M938T49			0.608586	1.98957	0.0775138	937.672	48.598	3889.18	4783.2	719.98	1115.4	1247.69	2890.71	4306.51	2343.41	2358.94	7169.14	4502.41	8459.17	3494.15	3458.43	3541.12
M296T435			0.653783	1.98739	0.260593	296.171	435.438	4465.63	47.4999	2651.42	830.757	2412.42	7962.9	1744.07	5113.73	9752.35	4735.56	77.7984	15086.1		65.9031	65.6402
M860T86			0.654251	1.9849	0.130224	860.478	86.128	1412.13	1304.1	1494.13	3906.78	809.576	8118.55	1834.81	3601.21	6057.42	5682.61	5701.73	10955.4	2832.42	2296.94	2757.49
M888T49			0.40157	1.98467	0.105982	887.671	48.69	1031.16	3283.46	517.182	225.209	557.955	1218.17	1664.66	1414.22	962.222	3730.04	2733.29	3057.08	1866.9	1866.83	1884.57
M367T472			0.290639	1.9834	0.179957	367.094	472.341	923.736	319.871	1440.08	1660.83	913.536	814.514	4451.01	936.32	648.925	903.373	1461.2	3643.5	3432.22	3432.46	3504.26
M720T181			0.850706	1.98286	0.0758258	720.496	181.182	1269.36	419.533	9052.25	5430.9	4522.94	5569.73	2567.32	9573.32	5828.29	7530.23	12356.4	14223.6	5391.96	5226.56	5233.4
M986T637			2.49819	1.97958	0.156364	986.012	637.475	24485.1	42524.5	41274	40218.6	23556.8	56806.5	34193.9	144757	54464	60534.4	9384.25	149725	71081.1	73424.8	63185.7
M249T1353			0.561709	1.97927	0.202234	249.099	1353.47	3025.17	2437.49	2022.01	2906.21	1997.19	3079.94	3212.38	5148.5	1550.8	13982.2	2962.92	3758.56	3252.76	3253.96	3376.44
M581T74			0.595693	1.97921	0.102947	581.451	73.598	1779.85	1688.92	4121.88	387.06	1468.53	2780.81	2212.49	1832.58	3391.6	6963.9	2630.56	7168.74	3779.34	3933.38	4251.83
M576T311			0.548309	1.97886	0.0223384	575.501	311.428	3918.14	2162.96	2030.3	1495.75	2204.74	2193.08	2624.6	2933.03	4779.82	5188.2	4277.36	7910.91	3337.35	3580.67	3348.22
M917T48			0.508042	1.97586	0.106254	916.713	48.096	1612.37	4692.76	367.116	1255.49	776.097	1761.73	2700.27	2143.6	1450.22	4939.84	3295.17	6149.43	2486.15	2426.63	2425.09
M1195T691			4.12334	1.97532	0.0099449	1194.99	691.058	69933.3	40204.9	99554.9	135067	133980	239776	150179	285863	246860	259307	183425	293666	198528	200035	200036
M446T340			0.335574	1.97441	0.241788	446.324	339.624	6113.7	3010.02	10073	963.351	7021.99	10388.9	6804.26	9843.17	35042.2	4731.89	11754.7	6004.05	4091.73	1616.19	4052.03
M756T83			0.689603	1.96595	0.245478	756.145	82.718	4344.27	3221.13	1619.34	1668.77	3030.64	8840.58	5373.43	2527.6	4977.16	6117.07	4676.45	21004.1	4950.88	5174.22	4971.76
M279T776			1.20491	1.96591	0.00634122	279.208	776.255	9081.78	11144.1	9923.01	10377.8	12384.1	15548.4	26208.9	19852.7	23093	34525.2	18299.7	12605.1	8151.29	8217.57	5031.67
M202T585			0.427663	1.96382	0.244875	201.933	584.542	68.9635	4382	10278.5	5777.68	12561.5	7295.85	26656.7	3820.25	6758.41	7756.13	30504.7	3772.14	6509.31	7119.84	6481.52
M1068T636			0.900757	1.96328	0.022188	1067.54	635.822	2649	5641.82	7962.45	5925.81	1378.2	2836.12	7669.94	13123	6349.51	9298.72	5044.71	10331.7	3900.67	4894.19	4879.19
M309T52			0.274119	1.95764	0.186219	309.147	52.427	3108.36	2315.01	2416.28	1282.33	1420.74	1275.84	328.127	2069.91	6510.53	769.82	5891.23	7566.81	3481.43	3606.82	3777.8
M257T770			0.332586	1.95728	0.0134666	257.038	770.194	678.944	421.831	760.008	683.114	721.247	814.205	827.191	1014.01	1383.28	1060.6	2271.63	1427.74	1211.53	1212.46	1288.38
M453T406			0.815098	1.95724	0.195193	453.279	406.484	1683.79	12601.1	3665.12	1153.44	6589.72	1027.33	15526	13437.8	2832.49	13426.3	2563.81	4511.99	14537.4	14814.1	14815.4
M272T67			0.0888584	1.95715	0.451825	272.131	67	373.943	1277.63	2132.38	1220.05	1042.25	1285.78	1010.23	672.331	9717.85	443.421	781.154	1724.9	802.888	985.97	980.266
M817T257			0.790414	1.95704	0.171086	816.573	256.924	8975.52	2195.44	2570.06	2888.62	2531.94	4064.03	1882.02	6953.15	4076.31	9141.43	5598.45	17802.1	5492.73	5091.88	5093.99
M587T675			0.658183	1.9508	0.147677	587.115	675.117	4539.6	1405.51	2205.85	4978.4	3774.74	1459.51	9849.45	5696.58	3211.11	1215.61	3579.46	12271.5	1228.11	1433.71	1230.89
M222T873			0.623592	1.95068	0.0896906	222.112	873.071	3883.04	3723.36	4046.13	4941.92	1957.63	1849.25	4051.19	4714.4	7188.09	14517.7	4117.38	5207.83	4557.32	4804.3	4799.71
M585T158			0.894345	1.95036	0.102092	585.374	158.065	454.033	431.521	10647	8885.84	24742.2	17561.3	21228.8	37593.3	19077.8	8910.02	15259.9	20260.3	11408.4	11238.5	13750
M282T807			0.419497	1.9501	0.166105	282.141	807.164	1368.04	1261.99	775.13	705.574	657.448	4522.61	1146.32	5552.69	484.401	4191.16	3551.42	3192	3959.67	3961.09	4235.65
M268T39_1			0.558923	1.94892	0.289472	268.065	38.933	6383.19	4650.23	2088.3	3179.01	2000.1	1607.9	4593.71	3525.32	19937.4	2749.45	3401.49	4593.27	1370.08	1376.95	1518.96
M470T382			0.180782	1.9474	0.269952	470.382	381.854	461.364	145.517	1614.61	494.585	1746.07	1780.12	888.529	128.374	5611.07	1203.19	1940.91	2384.07	774.095	552.264	772.366
M735T776			0.722282	1.94703	0.030907	735.161	775.763	2150.26	2875.8	3596.58	3465.02	2372.57	4658.43	4829.81	6501.04	4787.6	8409.02	2460.95	10236.2	3761.8	4268.04	3964.01
M311T732			0.38641	1.94671	0.216454	311.009	731.779	1382.91	3265.21	11817.6	15797.6	17649.5	5153.63	21992.1	8328.22	45073.1	8731.11	16770.3	6303.26	11320.9	10207.7	10055
M914T49			0.440908	1.9451	0.129467	913.675	48.652	1461.92	2812.26	57.0178	560.794	798.398	2237.22	2521.89	1175.71	1300.59	3435.3	1821.38	5165.1	2147.36	2050.57	2151.52
M809T719			0.574312	1.94411	0.00918771	809.438	718.89	1470.76	675.56	2419.08	3262.07	3741.36	2874.26	5962.18	3898.98	3193.16	6221.26	3579.47	5223.94	6002.26	5736.33	5648.08
M431T876			0.480707	1.94273	0.317406	431.285	875.863	2130.48	3225.62	2155.18	678.397	2340.3	1659.79	1860.68	1849.43	2552.79	12865.9	2401.54	2151.06	2716.55	2717.46	2817.57
M295T71_2			0.0452384	1.94011	0.572064	295.165	70.548	233.885	287.915	227.021	1879.06	275.799	238.596	156.29	101.527	5003.15	292.598	265.735	277.082	875.644	836.623	2672.46
M701T566			0.995546	1.93889	0.0272419	701.492	566.211	6505.26	2862.26	14398.5	7795.13	11676.9	14480.8	11702.8	15643.8	10976.3	25802.7	28069.3	19715.5	15934.8	15829.5	14030.3
M485T795			0.313119	1.9361	0.0878421	484.948	795.068	554.689	890.917	856.815	670.505	678.704	980.263	471.79	481.719	2351.16	1118.12	2484.78	2060.25	736	839.297	839.359
M884T85			0.680406	1.93167	0.0616596	884.48	85.377	441.223	2004.07	3721.57	6051.34	1502.66	3933.19	2091.09	7737.2	4204.65	8973.49	5166.3	5929.07	3520.57	3195.28	3551.53
M371T316			0.43894	1.93127	0.0406072	371.031	316.462	712.239	769.754	1248.29	2486.26	1662.06	1826.81	2855.21	4014.75	1515.11	4508.14	1689.97	2229.33	3624.8	3697.36	3696.28
M263T50			0.598756	1.93076	0.0780755	263.199	49.999	6054.93	5061.58	16864.5	3750.6	3222.03	4148.29	13327.7	19223.7	15177	5164.69	15954.3	6649.04	13285.5	8262.92	13312
M122T1375			1.48403	1.93055	0.134473	122.096	1375.09	55065.6	28076.3	124145	28044.9	44930.2	26646.8	72339.8	22926	165428	136589	153525	41694.3	31556.3	37238.9	31829
M313T715			0.362544	1.93053	0.279085	313.036	714.538	2501.46	1142.73	1110.8	700.364	2683.67	3462.05	10535.1	568.743	1366.85	5009.27	3276.81	1639.51	3214.1	3719.35	3159.61
M451T350			0.464837	1.92711	0.0175734	451.264	349.524	496.648	774.705	1934.29	887.178	1698.99	1797.84	3337.93	2001.74	2454.61	2059.39	1367.49	3404.92	1731.19	1562.19	1731.19
M902T48_1			0.465828	1.92515	0.040172	901.71	47.632	1486.71	2779.31	350.596	460.631	968.784	2343.58	2673.55	2082.78	1938.62	3520.04	1897.85	4038.42	1978.44	1803.48	1805.57
M605T794			0.204978	1.92347	0.0350893	604.898	793.955	106.172	212.586	378.553	184.102	428.177	414.451	294.233	311.617	911.454	586.058	574.165	638.607	474.748	444.81	474.891
M309T59			0.339935	1.92144	0.178459	309.203	59.424	1104.05	1543.61	1151.28	1740.61	1028.76	1734.52	1183.16	6821.61	2603.9	2082.42	997.974	2264.38	1005.23	1190.79	879.324
M706T352			2.98246	1.92133	0.0976687	705.581	352.176	55001.9	109536	63527.2	46580.3	49731.2	59063.3	162621	241251	53137.3	151582	52287.4	75837.3	181112	181103	171021
M228T95			1.66706	1.92115	0.40962	228.051	94.826	4682.95	91515	64685.4	15885.2	45879.7	46225.7	41055.1	35675.2	106777	19582	306051	7407.51	21268.7	22619.3	22645.4
M896T47			0.542976	1.91909	0.0286396	895.741	47.46	2010	4124.57	558.877	1145.19	1522.47	2822.82	3959.73	2842.33	2546.14	4467.62	3567.5	5998.67	3290.4	3079.86	3089.81
M395T874			0.430229	1.91882	0.047252	395.194	874.205	1153.08	2031.64	651.538	1255.63	897.669	2526.38	3579.16	2389.03	528.632	2775.43	3066.14	4002.13	2894.11	2834.15	2893.8
M247T115			0.303284	1.9185	0.279666	247.001	114.686	1708.3	550.656	1845.99	2001.79	823.507	1952.87	2065.92	2389.08	8382.09	2637.67	1270	297.533	1200.08	1208.63	1190.02
M296T666			0.438754	1.91816	0.132751	296.065	665.885	3479.69	1164.72	2138.42	1335.05	3511.6	2130.59	10215.4	1771.99	2699.52	3766.86	4232.12	3708.11	4677.3	6467.62	6464.55
M232T105			1.34469	1.91572	0.334531	232.046	105.277	18919.4	50234.6	2280.2	5274.52	3201.21	5910.94	19284.6	71438.7	2538.42	41844.8	6992.33	22310	16408.7	16325.5	9871.93
M892T1019			0.180271	1.91566	0.172409	892.289	1018.89	200.119	1068.2	704.051	1412.35	721.483	1231.25	1109.37	608.783	4241.34	1363.19	1552.69	1349.37	755.041	723.61	723.757
M553T741			0.349119	1.91542	0.117412	552.81	740.635	215.942	972.127	947.141	858.355	1054.42	830.214	1161.93	956.34	585.01	2330.72	1053.79	3256.01	3818.35	4699.18	4710.1
M186T688			0.776748	1.91457	0.0586276	186.406	688.159	5957.98	11013.4	3491.63	4416.24	3857.6	7725.64	6046.21	12557.9	12047.9	20576.8	13696.6	4884.52	9900.75	8320.02	8345.71
M278T324			1.08614	1.91178	0.110489	278.036	323.937	7174.53	11106.6	8266.68	1757.24	8154.95	14468.7	11112.7	8120.32	20761.3	8428.94	14799.7	34141.5	8472.64	8576.12	9850.45
M423T672			0.250016	1.91131	0.0293725	422.884	671.943	477.651	101.845	275.241	652.106	1120.24	600.863	1403.13	855.088	597.068	1006.57	918.781	1388.95	1417.32	1417.21	1500.49
M329T780			0.689978	1.91108	0.041542	329.182	779.663	1237.87	1825.85	3108.8	4851.31	4628.09	5845.64	5485.45	10204.6	5112.08	10725.6	3741.17	5814.66	11523.5	12111.1	11749.3
M1184T694			1.28371	1.91037	0.0537695	1183.51	693.623	17914.5	17994.8	7462.1	15383.7	40302.9	10486.6	15541.1	25056.7	47876.7	55047.6	35114.5	30634	32321.1	32374	24758.1
M877T47			0.450219	1.90781	0.00261466	876.715	47.42	846.106	2396.75	865.286	1493.05	1116.52	1858.35	2738.82	2162.51	2163.34	3356.29	2684.85	3255.65	2240.51	2241.37	2143.34
M943T76			0.470041	1.90512	0.561404	942.631	76.072	2171.17	6409.52	768.69	775.032	1749.71	819.53	808.134	713.962	1062.34	1426.54	848.246	19323.7	1095.25	1099.84	870.766
M564T199			0.559377	1.90418	0.253355	564.357	199.262	5179.74	4670.97	9417.21	15972.3	10333.8	4018.25	12177.2	43741.7	16977.4	5395.01	10530	5611.05	3897.15	4487.33	4388.12
M817T315			2.03034	1.89694	0.0545207	816.573	314.655	20414.1	18544	24732.2	14205.6	36995.3	65981.4	30714.9	69730.5	29703.1	69763.3	54318.3	88874.7	34143.2	34404.4	34401.7
M521T782			0.576987	1.89624	0.0414817	521.14	781.535	2097.17	1023.72	1885.13	5714.31	2756.12	2270.95	3600.45	5621.81	5407.06	6567.38	1941.07	6723.14	7293.11	7803.5	7770.88
M255T36_1			0.354708	1.8958	0.498226	255.064	35.913	19668	18803.1	5156.34	8371	6467.82	1188.2	10095.7	12253.9	79790.1	2109.45	3858.78	4985.09	892.003	1082.17	1146.31
M258T66			0.905558	1.89511	0.0493243	258.08	65.9585	7662.89	7322.23	4257.9	2778.63	2627.51	2705.88	5518.77	7933.58	4557.17	13292.4	7239.86	13299.1	5588.63	5520.61	5587.68
M230T599			0.392481	1.89363	0.220275	230.245	599.128	6085.43	1550.66	5657.11	681.844	1229.62	1373.85	4930.58	5437.02	1154.35	734.622	8368.22	10768.7	5024.84	5097.67	5024.86
M213T1370			1.21855	1.89254	0.0997029	213.015	1369.87	11779.5	7934.59	10042.1	15172.1	13111.9	8858.23	13169.4	40509.5	5216.14	13643.6	31902.9	22166.5	13210.4	13235.8	13614.5
M765T309			0.773254	1.89251	0.0533609	764.597	309.38	5960.78	8938.68	4770.13	4491.04	5630.34	4645.08	6059.48	14227.4	14672.3	6720.75	5320.41	18170.2	8866.84	7764.42	7785
M249T77			0.701365	1.89238	0.277075	249.149	76.972	1758.03	3080.04	2656.99	9696.41	3346.87	1380.63	3863.46	14825.9	2156.3	2843.56	2746.02	15043.8	5554.64	4015.92	3947.33
M226T53			0.589381	1.89024	0.424377	226.215	52.714	1603.68	2541.87	1917.41	3312.89	47807.9	1205.46	30705.2	3717.68	37287.1	2007.59	2338.74	34313	2244.31	2241.2	2121.22
M252T38			0.492253	1.88899	0.277633	252.032	37.945	4429.52	3813.46	2188.96	1876.92	1295.88	1122.39	1902.38	3174.84	12922.4	2128.3	1269.01	6422.5	1519.57	1632.69	1521.43
M380T867			0.617165	1.88857	0.417327	380.086	867.441	3272.89	3645.57	4732.05	4181.74	3479.34	3549.68	3475.96	2795.97	4236.83	2204.98	3335.63	27125.6	2871.19	2879.98	2755.68
M384T766			0.372319	1.88825	0.249291	384.075	765.83	630.946	1795.27	1081.82	1341.44	1123.91	737.546	674.011	1730.75	1464.07	2077.26	800.258	5925.59	721.442	714.186	765.334
M754T73_1			0.298592	1.88776	0.224315	753.516	73.488	7908.13	2482.55	6416.61	7554.41	3974.57	3365.72	9554.01	5412.35	7863.48	6426.26	26960.5	3628.97	5726.82	4546.48	4429.05
M565T675			0.732152	1.8857	0.159336	565.134	675.011	5767.18	2467.17	2582.29	6942.38	3800	2284.72	11451.5	6993.31	3448.98	1598.87	5558.29	15911.1	1317.62	1696.17	1687.63
M173T1163			0.657137	1.88445	0.106254	172.958	1162.9	2992.91	2809.47	2624.17	2050	2146.56	3411.9	3125.54	2705.48	3127.28	7814.52	3135.94	10308.5	2810.22	2801.67	3122.58
M285T543			0.187486	1.88425	0.325845	284.946	543.221	98.6536	426.568	670.5	190.991	1637.86	487.113	452.592	221.826	2788.41	503.129	2187.37	463.572	516.13	507.958	514.016
M905T49			0.469035	1.88382	0.0831145	904.674	48.622	2048.22	3650.57	591.241	903.281	771.987	1053.42	2706.23	2416.57	1097.86	3738.67	2397.19	4633.1	1865.68	1893.99	1865.9
M516T726			0.445651	1.88276	0.224117	516.202	725.534	1842.14	948.917	1857.87	863.659	709.068	2614.63	1878.07	2571.57	1728.01	958.566	2073.39	7426.99	1089.01	857.325	866.714
M253T852			0.753066	1.8827	0.00377953	252.945	852.357	3665.24	1764.74	2445.76	2532.54	5199.94	4615.43	7140.94	4181.81	5921.54	8349.2	5903.78	6577.71	8134.36	8143.87	8577.55
M597T307_2			0.528909	1.88235	0.00693209	597.484	306.806	3311.7	2603.92	1290.84	1868.39	3119.62	1796.59	3740.34	4236.32	3773.25	3485.01	4227.99	6873.13	3175.89	3403.87	3176.29
M291T877			0.417586	1.88195	0.0880011	291.147	877.302	1682.39	1903.56	1509.39	1021.74	851.598	573.735	1220.95	4104.07	1294.1	3009.22	1045.98	3520.12	1310.82	1195.89	1329.64
M777T49			0.655062	1.88075	0.0992229	776.597	49.2565	3603.16	5659.55	2311.94	2387.81	2175.4	3959.85	3971.85	3818.1	3153.83	7635.83	6092.25	13127	5150.49	5157.73	4952.29
M756T719			1.36139	1.87922	0.00499384	755.956	718.555	19433.7	4622.05	9528.61	10401.8	15613.1	27485.7	28005.2	28286.2	22197.7	31288.5	25564.7	28310.1	27032.6	27288.9	28869
M283T69			0.876699	1.87302	0.452234	283.079	68.5245	68120.9	1291.18	1018.35	1426.3	470.602	643.696	736.413	28199	818.659	34492.3	47914.2	24515.6	44417.4	44419.8	44890.1
M368T935			0.386011	1.87282	0.278417	368.075	934.579	1479.51	1716.78	1793.13	1079.47	429.951	8342.33	531.216	6218.28	820.737	4116.52	9830.43	6277.61	2901.16	2877.73	2910.86
M447T76_2			0.692571	1.87065	0.0212304	447.249	75.966	1898.99	2208.1	3145.29	5010.29	4640.75	2641.66	7728.9	6573.28	9135.86	5098.93	2947.79	5077.22	4445.95	3498.54	3735.54
M738T312			0.670418	1.87012	0.0378022	737.576	312.413	5978.13	4078.04	4077.17	1981.83	2919.54	3757.92	3372.21	5257.31	9768.21	10083	4335.94	9808.31	5004.67	5051.5	5413.9
M351T329			0.457074	1.86923	0.071185	351.112	328.865	760.452	1255.62	1422.97	1888.29	1811.78	1192.16	1594.53	1293.55	1109.28	3566.84	4123.55	3885.28	1702.28	1711.63	1941.79
M253T876			0.701456	1.86885	0.0439835	253.008	876.46	3493.79	7757.98	6781.49	3272.45	5326.31	4875.79	14268.9	7164.49	15633.8	11082.9	5413.47	5319.69	4423.29	4269.71	4270.42
M405T794			0.344817	1.86783	0.0948098	405.022	793.806	307.75	1032.69	969.467	1356.43	605.499	1023.72	1227.78	1651.25	1161.41	1662.63	738.201	3449.93	1089.37	1089.41	1147.8
M870T48			0.433795	1.86741	0.0420202	869.719	47.5435	944.932	3090	624.985	632.926	1628.89	2048.89	2806.75	1827.84	1435.39	3589.22	3352.13	3740.5	2849.7	2849.53	2876.76
M610T273			0.468888	1.8669	0.0743666	610.231	272.575	364.203	439.535	4356.85	968.929	2920.19	2369.7	4639.62	3581.74	5435.62	2881.88	2244.03	2536	2658.57	2658.53	2443.83
M414T850			0.0560336	1.86134	0.478905	414.063	850.328	933.766	643.559	729.914	346.126	617.727	484.589	495.457	519.697	345.883	326.019	4802.79	500.742	620.96	609.591	725.224
M392T775			0.333047	1.86054	0.0475036	392.089	775.224	629.316	1130.93	687.99	678.48	1192.36	730.516	2440.95	2474.83	1146.59	1612.81	814.134	905.655	756.915	791.294	763.193
M729T309			0.803979	1.86023	0.0490941	728.519	309.136	9508.93	6714.59	6269.64	4349.78	6942	5030.62	9912.36	11488.2	12890.7	6782.43	8111	23021.3	6052.6	4624.21	5578.09
M204T732			0.349002	1.85909	0.0145875	204.003	731.588	721.366	501.058	1769.3	1053.1	1118.64	1993.5	2964.05	2565.5	1539.52	2576.63	2253.1	1406.59	3160.6	3002.41	3160.61
M230T104_1			0.549174	1.859	0.0257163	230.058	104.236	1027.96	2520.64	2782.29	519.283	1786.91	2689.75	2985.1	3907.63	1450.87	4608.87	4591.26	3512.88	1669.68	1670.36	1709.57
M373T895			0.243791	1.855	0.044433	372.925	894.832	285.377	364.704	485.022	192.145	468.637	716.512	323.364	1273.65	976.088	618.552	593.043	875.795	826.956	695.406	702.971
M509T336			0.48179	1.85398	0.210889	509.304	335.951	1552.29	2798.75	3970.77	1897.61	796.872	5012.2	4801.57	12591.9	2275.53	4347.33	2678.14	3021.99	1893.98	1893.28	1950.51
M256T319			0.915031	1.85393	0.0394661	256.056	319	989.941	7224.23	12553.3	1402.85	5906.05	4927.49	9628.14	10077.3	13731.5	11961.3	7109.4	8679.31	3694.19	6171.39	6205.37
M768T720			0.509113	1.85377	0.00301823	768.44	720.287	2237.98	2167.29	2955.25	3360.74	3160.69	1622.35	5521.23	6626.24	5046.11	3226.69	3879.43	4441.73	6020.07	5717.4	5759.06
M880T345			0.439532	1.85364	0.037292	879.502	344.503	1246.95	871.515	1448.61	1852.95	1558.55	573.072	1741.64	2164.75	961.53	3012.87	3812.53	2304.68	2442.75	2443.55	2291.25
M222T668			0.38016	1.8536	0.030328	222.112	667.649	724.256	671.1	2052.67	2007.52	3121.83	2149.15	4846.33	2952.69	2037.73	3756.61	4199.18	2090.17	6420.23	6419.28	6856.12
M291T66_2			0.289869	1.85335	0.199999	291.158	65.606	519.817	1345.83	330.309	422.483	1094.21	2695.76	2896.56	2322.79	2382.69	301.084	357.81	3616.09	671.315	592.835	984.486
M813T276			3.44233	1.85274	0.167678	812.608	276.078	49382.1	62201.3	50666.1	168984	94958.2	137062	107265	110622	158190	171898	82124.7	413465	70488.9	77258.1	70825.7
M362T382			0.398209	1.85267	0.0155437	362.276	382.358	1546.29	1493.29	2345.46	838.859	970.945	3581.64	4228.52	2190.64	3582.72	2557.2	3798.73	3607.42	2162.84	1870.88	2208.75
M758T49			0.348897	1.85261	0.0231537	757.586	49.034	1667.38	657.288	821.405	2446.74	1033.91	1118.07	2722.85	1859.87	1956.11	1721.4	2341.44	3746.44	1876.26	1814.47	1875.77
M856T48			0.402245	1.85185	0.10539	855.672	48.1625	842.639	2966.38	740.704	824.98	919.53	816.313	1680.12	1768.32	1182.3	2881.66	1586.93	4068.37	1197.99	1019.58	1011.66
M936T49			0.542628	1.85144	0.132894	935.659	48.646	3448.23	3145.4	581.675	1140.34	1217.41	3158.45	3243.53	2002.89	3547.02	6420.38	1166.8	7117	2796.47	3549.98	3560.64
M187T74			0.31593	1.85127	0.298454	187.145	74.04	4400.71	3709.82	5017.06	2703.55	7662.36	6056.09	5869.39	5067.85	27858.8	5572.74	4484.1	5851.23	3772.56	3335.63	3767.01
M122T1280			3.58763	1.84834	0.194504	122.096	1280.04	25143.8	53954.9	70442.9	291977	96097.5	73643.4	60908.6	248662	105000	285084	88353.9	341806	154840	178785	170238
M522T674			0.381028	1.84721	0.00736491	521.927	673.752	572.354	940.508	1209.68	1155.52	2701.19	1746.66	2828.36	1815.81	2312.56	2700.98	2828.91	2893.05	2653.52	2647.99	2847.99
M125T57			0.442082	1.84702	0.148215	125.024	57.19	1678.32	3200.45	1532.49	1256.81	1073.07	1755.71	1046.11	3752.44	7222.89	1836.18	2211.04	3319.22	1295.55	1593.57	1586.86
M733T311			4.76455	1.84414	0.0338076	732.552	311.428	225524	258751	158334	176111	210455	252454	258506	324600	493254	295850	283526	707770	245678	236769	236717
M826T679			1.10362	1.84348	0.0131595	825.979	678.754	11806.1	21562.7	12829.4	21596.2	14190.9	17078.7	15955.5	39050.6	35022.6	18427.8	39604.7	34561.2	41486.2	36591.1	41518.2
M409T676			0.301725	1.84277	0.281569	409.096	676.32	262.487	75.3285	203.9	2384.95	387.526	389.338	1482.77	1048.21	529.343	420.832	1014.15	2329.44	1037.08	877.493	890.038
M556T534			0.460236	1.84244	0.152373	556.441	533.953	1293.49	1603.5	1740.46	4066.63	2520.75	2277.97	9136.2	2146	2648.8	5256.1	1395.78	4295.22	7917.21	8014.33	8014.2
M831T299_1			2.16349	1.84198	0.0580849	830.566	299.408	61731.2	52200.4	39640.7	40116.2	49809.8	61582.2	98827.6	49796.9	115864	55278.7	65806.3	176379	55406.3	55321.9	56915.7
M129T154			2.52402	1.84159	0.140279	129.019	153.852	60103.3	90586.3	116617	1269.55	38682.4	85718.4	73949.5	133576	246771	76069.2	149619	43717.8	56148.5	56222.1	61463
M505T783			2.20186	1.84074	0.0637357	505.168	782.937	20004.3	12096.7	32503.6	85337.4	47109.8	35654.5	47823.4	91746.2	56928.8	98891.2	34792.7	98169.4	121026	125918	125846
M452T586			0.218191	1.84034	0.261868	451.96	585.96	758.974	1679.76	3083.67	2092.07	4237.99	2581.24	7585.95	1511.13	2141.46	2450.59	11118.2	1755.56	5643.05	5740.13	5643.41
M208T411			0.463059	1.83514	0.0880731	207.952	410.649	1021.56	1758.5	2588.46	2278.55	2978.06	2769.12	8415.77	4451.23	3692.32	2615.91	3570.35	1834.75	2387.39	2665.11	2664.37
M443T52			0.237422	1.83441	0.0144961	442.968	52.1185	494.826	325.367	178.518	337.444	237.157	613.013	471.718	713.664	542.104	1001.68	547.872	733.566	453.935	449.646	449.65
M122T41			1.80744	1.83342	0.0734219	122.096	40.876	21494.1	47735.2	33520.8	26570.5	32469.9	33321.1	77790.8	91492.4	33752.3	23475	36221.1	94989.9	105510	75363.8	75080.7
M521T673			0.457887	1.83281	0.00516762	520.918	673.069	1078.27	979.473	1580.49	1766.26	2295.96	2714.15	3426.64	2429.53	2157.86	3674.42	3393.06	4006.46	3606.31	3606.29	3666.75
M687T362			0.47205	1.83247	0.113086	686.562	361.513	513.741	650.542	2837.93	4121.39	1898.92	3356.26	670.276	6998.83	3616.58	4117.53	3396.54	5716.45	2656.64	2941.37	2619.58
M295T852			0.373686	1.83147	0.00113903	294.907	851.939	661.409	393.193	984.083	625.449	1138.92	982.25	1524.13	1337.24	1141.93	1797.09	1384.94	1578.78	1659.93	1783.69	1675.99
M904T48			0.469109	1.83107	0.146358	903.669	48.1375	2922.21	3204.61	581.539	877.819	1177.42	2004.27	1785.62	1820.94	1084.39	5766.91	3654.68	5604.12	2703.23	2810.11	2810.99
M691T691			3.38965	1.82716	0.0436561	690.993	691.409	18501.2	57042.9	68705.4	66887.7	158207	168517	159891	201220	75833.2	192151	140324	213340	150514	148655	150499
M758T310			0.8259	1.8263	0.0671688	757.514	310.442	5278.07	7874.99	4504.48	6483.2	9417.36	16511.7	28894.9	13107	15066.6	10124	10376.1	13873.8	6874.84	7609.35	7616.92
M551T731			0.317421	1.82511	0.197624	551.091	731.345	1547.28	564.079	834.707	2586.6	1201.25	603.71	2766.19	3060.61	782.377	739.208	1211.5	4832.12	526.767	542.658	543.243
M157T600			0.257569	1.82499	0.0252407	157.083	599.693	758.935	505.793	556.213	449.354	574.902	528.495	1353.45	1395.19	332.751	1262.59	1093.53	719.449	582.155	621.646	739.476
M691T811			0.37501	1.82494	0.136596	691.066	810.619	806.596	997.501	1263.29	3181.87	695.622	874.516	4058.92	886.55	3528.7	3017.77	1200.71	1577.23	1684.65	1320.26	1284.34
M783T281			12.5325	1.8243	0.106237	782.568	281.092	518908	618224	1.0156e+06	1.14892e+06	1.44152e+06	3.10329e+06	1.04211e+06	1.48299e+06	2.85804e+06	3.10412e+06	1.75281e+06	4.0742e+06	988857	1.16875e+06	1.17401e+06
M289T67_1			0.58396	1.82411	0.215914	289.179	67.263	10641.5	7711.57	4374	3462.13	3688.86	3054.02	20488	2738.62	5722.87	7952.49	19183.3	3986.5	7745.93	9357.53	9338.9
M778T779			0.557666	1.82388	0.0422596	778.244	778.822	921.339	2916.28	3478.03	3328.75	2271.58	2426.8	4889.89	6449.97	4536.18	6935.82	1323.73	3847.83	4519.38	4058.54	4511.98
M227T59			0.566705	1.82377	0.0950425	227.106	59.179	2456.04	3664.4	2117.25	772.39	3316.87	4704.25	7590.53	1650.34	5450.06	2098.65	5822.6	8448.73	2702.86	2695.21	2408.7
M301T66			0.675367	1.82357	0.540253	301.179	65.891	10001.3	6785.01	3028.02	29307.7	8791.45	5314.92	2860.98	82808.7	2804.99	22252.3	3586.03	988.391	3552.64	3525.03	3905.01
M284T644			0.16652	1.82335	0.0547595	283.974	643.779	403.524	383.485	431.239	272.323	272.612	547	289.02	638.006	629.959	439.853	1053.67	1161.76	354.354	332.107	353.238
M640T76_2			0.59861	1.8224	0.0458265	640.36	76.0455	2693.61	2259.67	2837.77	764.902	1260.73	4613.41	1967.86	3925.91	3200.6	6020.06	5156.79	6026.14	3231.5	3174.56	3096.15
M998T938			0.233517	1.82183	0.141448	997.508	937.88	362.169	1000.1	427.927	162.975	739.844	876.029	564.648	411.962	1513.38	942.031	846.977	2223.19	544.734	545.42	571.624
M135T407			1.16197	1.82098	0.189551	134.894	407.295	3138.61	5527.93	10959	15572.3	8407.01	13049.9	7746.12	11909.3	15457.4	15506.7	10260.1	42287.8	11937.2	12164.7	10387.3
M99T857			0.737167	1.82088	0.135937	98.983	856.648	11583.3	25570.7	12063.3	5811.45	12906.8	15877.3	9031.06	9602.46	44305.6	14967.7	40108	34598.7	9452.81	9468.06	9489.82
M325T37			1.50405	1.82031	0.385729	325.237	36.836	7687.08	153041	1841.76	2776.59	1819.74	121766	204833	62341.9	139846	114843	2605.78	1477.91	64912.4	112437	112020
M716T869			0.301672	1.81923	0.0208685	715.904	868.902	250.298	395.104	747.468	632.22	789.81	755.43	1122.26	1551.48	983.343	1289.7	428.653	1119.8	1157.14	1157	1215.76
M642T402			0.434233	1.81906	0.185121	641.51	401.706	203.507	2458.53	971.637	418.948	1664.42	2791.77	481.855	2649.8	2142.75	4812.45	1167.33	4223.86	691.91	695.416	872.376
M252T276			0.76803	1.81862	0.00402199	252.022	276.108	1792.34	3618.65	3217.49	5521.01	3939.23	6598.41	8733.75	6913.52	7878.85	8846.77	7522.43	5001.09	8266.49	8579.09	8267.57
M618T870			0.372663	1.81615	0.0224126	617.926	870.364	917.603	853.574	905.936	462.598	1013.51	1259.1	1168.34	1218.77	1842.43	2605.14	1004.44	1990.44	1794.22	1569.55	1767.12
M728T308			0.665213	1.81604	0.257102	728.478	307.786	6567.34	1235.64	1845.02	1588.16	7247.92	8803.87	2665.79	8424.72	10391.1	5552.93	2086.1	20435.3	4387.3	4512.77	5745.62
M129T133			0.745335	1.81592	0.0528924	129.092	133.267	2887.61	3541.78	6341.99	3076.24	3132.9	9383.35	11547.2	6109.78	11457.3	11539.8	3629.22	7223.25	8981.68	9461.36	9669.56
M293T77			0.993403	1.81555	0.171454	293.159	77.391	4710.29	16701.8	5841.22	2702.72	14359.4	12196.2	4503.02	12020.6	15071.3	17167.8	15323.3	38513.8	9565.91	9329.75	9566.28
M447T672			0.181387	1.81477	0.0604638	446.845	671.713	20.8274	54.2963	450.813	363.291	629.898	516.928	854.794	441.947	346.363	600.583	635.096	816.175	936.563	938.267	982.901
M594T897			0.262491	1.81465	0.0245065	594.069	896.914	297.57	627.454	492.625	257.986	586.012	554.866	583.354	1211.24	1233.24	576.719	573.754	932.696	476.39	447.832	476.793
M559T74			0.811433	1.81391	0.00893918	559.469	73.598	4137.99	3423.23	6321.13	1894.04	3119.17	4555.44	3973.5	7632	6470.28	9534.54	6705.9	8221.84	6808.84	6810.32	6912.51
M868T48			0.581841	1.81321	0.0468446	867.705	47.7045	2588.02	5699.04	586.629	2693.13	2161.35	2681.76	4642.31	3849.87	2618.07	5806.12	5127.02	7711.2	4054	4004.61	4053.86
M692T330			0.839296	1.81216	0.107493	692.467	329.869	5396.01	4663.11	7224.64	5941.22	13294.6	11863.8	29340.6	18749	10114.5	10520.5	6146.43	12807.2	6098.68	5880.04	5878.13
M387T906			0.212428	1.81207	0.258049	386.998	906.374	331.215	560.506	552.965	826.106	1394.2	584.845	335.628	334.721	1580.64	518.772	1777.79	3153.45	562.611	587.692	588.022
M294T77			0.382141	1.80822	0.0262242	294.164	76.973	1892.12	1251.36	1288.51	1737.14	1528.33	1529.95	2920.02	1992.15	1713.06	2023.81	3276.61	4759.53	1572.86	1574.87	1677.15
M816T305			2.32927	1.80769	0.369619	815.56	304.781	19046.6	23331.2	36554.4	4518.09	45105.7	122683	14363.1	45470.5	32311.2	89036	47269.3	225712	26234.2	26187.1	25129.2
M469T729			0.374838	1.80768	0.187133	469.09	729.055	1412.59	1233.27	1577.78	3501.44	1891.06	942.181	4598.53	3721.05	1264.56	957.768	1744.92	6799.23	834.544	871.614	834.211
M161T366			0.359332	1.80639	0.0264798	160.935	365.666	575.823	55.1493	1227.71	1121.81	1234.86	1295.58	1717.13	1110.82	1365.42	2551.26	1607.29	1602.98	2311.97	2423.6	2401.78
M651T51			0.308668	1.80635	0.403222	651.285	50.6475	839.172	953.35	1225.59	594.435	292.601	566.984	398.966	726.229	634.139	932.117	681.939	4704.85	546.914	545.188	533.318
M259T668			0.228288	1.80533	0.0231357	259.281	667.924	1138.88	248.182	1011.11	445.122	763.316	882.017	1615.61	1021.28	1004.25	1173.54	2109.66	1179.12	2138.45	1843.7	1830.19
M354T59			1.59018	1.80457	0.0486183	354.282	59.464	31127.1	28443	56284.6	40612.1	36606.9	5086.2	56199.9	103789	40014.7	48519.7	66058.6	43010.6	42482.4	42398.5	34341
M693T336			1.43271	1.80371	0.0166449	693.478	335.988	10522	5530.39	22452	13152	21289	28247.7	35395.8	31280.2	31100	33722.7	15002.2	36021.8	9372.13	9859.34	10807.9
M427T76			0.596116	1.80353	0.109724	427.293	75.966	1287.26	1207.94	1046.57	2997.06	3907.49	4656.52	4276	1977.38	3220.17	7283.95	2915.49	7565.41	5196.31	5498.14	5498.33
M545T673			0.185874	1.80285	0.00699726	544.878	672.585	309.808	177.506	417.015	366.32	614.482	357.193	872.404	637.657	517.685	473.116	702.483	839.22	812.676	813.08	837.87
M551T379_1			0.368037	1.80189	0.0119018	551.33	379.143	3038.08	2101.76	1982.79	1841.9	1712.96	1318.46	3393.55	2278.43	4077.74	2356.84	5147.72	4361.07	2567.72	2560.5	2778.51
M729T82			0.765407	1.8018	0.0614633	728.519	81.873	9163.22	8008.39	3290.49	2617.52	4162.32	4516.66	13046.5	2476.57	6940.58	12655	9783.27	12320.7	7602.54	7600.79	7528.74
M524T76			0.377098	1.80056	0.299295	524.364	76.4005	926.692	3110.94	965.094	1497.65	1583.63	952.336	1749.04	1615.18	1675.58	1641.05	1644.89	7944.8	1460.86	1550.12	1476.78
M445T431			0.974084	1.80038	0.198261	445.301	431.267	5755.7	12271	5921.66	6638.97	8527.21	14937.5	8385.33	26729.9	7116.93	36153.7	11241.5	7687.24	7584.05	7715.6	7716.42
M278T79			1.25369	1.80021	0.519849	278.183	78.6345	5003.86	28466.2	4453.04	20819.4	29890.9	2493.19	2492.85	4542.84	39771.4	3415.02	4272.58	109552	13760.1	31148	43273
M491T81			0.480339	1.79976	0.0173249	491.142	81.33	282.507	535.446	2216.84	2186.02	1715.25	1592.03	2467.88	2201.92	2031.73	2616.45	2499.13	3531.37	2031.51	2155.23	2159.96
M488T58			0.0549151	1.79919	0.580025	488.357	58.289	6051.48	6888.86	3952.73	11211.6	5264	1280.51	3087.47	2186.5	1549.51	1803.52	50141.1	3572.27	1217.74	1286.57	1218.16
M618T829			0.415403	1.79866	0.00988893	617.921	829.181	1266.8	978.19	1195.05	362.112	1343.11	1152.52	1369.84	1736.46	2537.35	2163.99	1200.78	2319.17	1055.49	1053.5	1114.95
M193T796			0.418827	1.79707	0.0956543	192.988	796.098	1731.94	2156.55	1502.42	1076.84	1374.15	1438.53	904.351	1829.02	5110.86	2051.09	4304.78	2477.5	1552.54	1640.16	1641.99
M699T283			0.681608	1.7968	0.0354623	699.408	282.971	1031.29	375.538	4251.58	3827.54	4542.52	6491	6725.31	4003.24	7685.2	6694.11	4563.3	7198.26	3778.41	3768.61	3281.79
M268T75			0.55944	1.79578	0.0142346	268.189	75.348	2085.01	3118.8	1915.6	5675.26	3622.02	5087.91	4404.61	7052.16	4893.75	5479.28	8874.78	7913.03	2410.66	2466.86	2466.77
M435T76			0.624013	1.79533	0.0486494	434.779	75.769	3428.12	3521.19	5974.45	2448.07	2423.29	3147.91	5571.75	11420.4	3444.12	6096.36	4736.45	6330.66	4736.67	4495.9	5005.83
M147T411			0.61308	1.79487	0.0679239	146.966	410.595	1905.06	2203.38	2007.58	2692.59	3235.68	3317.36	6319.15	2908.99	1737.56	6442.8	2857.7	7305.91	2896.79	3231.28	3213.92
M269T68			1.16403	1.79113	0.521555	269.045	68.378	45946.3	38455.5	12938.2	5847.68	22658.4	3704.58	17489.7	17525.3	161659	4100.61	11148.5	20119.6	2555.35	2158.84	2170.09
M527T857			0.494921	1.79093	0.168087	527.157	856.94	2914.97	2930.41	2819.11	3733.04	3445.27	1861.57	6326.49	5491.33	3544.29	1619.03	2583.25	12143	1546.61	1587.95	1586.75
M630T925			0.264991	1.78915	0.399033	630.083	925.383	1186.68	3725	745.109	137.724	514.102	521.79	335.38	1735.56	720.373	637.715	2850.66	5940.93	420.468	502.653	502.156
M96T316			0.285258	1.78806	0.107702	96.0068	316.281	1735.27	927.441	4632.35	2435.24	5732.31	648.465	3053.27	5028.47	7113.94	1662.53	6562.86	5386.52	2926.87	2498.29	2932.32
M285T822			0.249312	1.78694	0.0241838	285.072	822.496	306.776	657.051	440.003	406.033	379.971	400.523	624.41	296.987	956.942	695.648	987.085	1067.74	423.493	487.561	423.076
M864T48			0.367259	1.78641	0.1777	863.677	47.718	1315.58	2409.26	478.905	653.479	1101.14	1068.91	1558.48	526.765	949.468	4235	2116.63	3167.27	1775.93	2009.89	2007.67
M645T366			1.19622	1.78598	0.0436022	645.494	365.586	10133.9	6622.51	19506.3	11114.4	18784.1	12659.3	9963.18	29389.5	17937.7	24306	20980.6	38195.2	9099.03	11193	11099.3
M700T351_1			1.13032	1.78553	0.162051	699.541	351.12	10932	13637	19472.3	8045.21	61327.6	5518.13	30434.7	58977	42953	26388.5	18399	35205.2	24258.1	25272.6	25212
M447T731			0.471569	1.78517	0.177514	447.107	730.593	3403.73	1710.17	2064.14	4021.59	2825.73	1559.94	5894.73	5013.85	1988.67	1886.41	2580.33	10458.4	1511.91	1506.63	1097.59
M496T600			0.32776	1.78499	0.0412095	495.924	600.121	275.722	2355.25	1663.41	1205.02	1648.28	2040.39	1840.35	1727.28	3571.66	3786.41	3640.5	1834.4	2529.34	2905.87	2913.04
M756T309			0.488592	1.78493	0.11056	756.137	309.471	5850.93	3602.66	2109.83	1884.06	4263.8	3030.47	2598.21	5751.28	9312.36	3272.49	4655.23	11433.1	3991.36	4418.09	3989.61
M95T267			0.484128	1.78472	0.0627644	94.9244	266.821	37.1523	3270.03	2666.21	742.34	3372.01	3075.6	5201.44	3202.21	5780.08	2101.68	4259.57	2947.91	3103.99	3161.1	3423.15
M367T679			0.992809	1.7843	0.0475225	366.974	678.762	5686.67	11695.1	6520.94	7598.75	5299.23	8198.44	19495.4	18791.1	7207.45	16987.4	5860.23	11950.5	9816.55	9846.04	8126.75
M349T70			0.204974	1.78394	0.41546	349.165	70.043	4687.46	4038.92	1576.6	3167.49	2018.32	454.804	2779.75	2667.73	16424.9	2350.01	797.126	3422.95	1802.24	1800.14	1708.35
M616T657			1.20954	1.78123	0.00507056	615.992	657.246	8704	10613.3	13753.7	11018.9	6399.65	6849.11	20126.6	12621.6	17497.8	15168.4	23643.7	13075.3	14657.2	15800.9	22141.6
M317T69			0.525136	1.78056	0.150392	317.247	69.253	3498.45	3035.35	1833.91	2966.11	3401.11	1791.17	2410.7	3729.44	2911.32	7989.8	10057.4	2327.07	2611.23	2564.23	2853.37
M381T77_1			0.500558	1.78006	0.0779827	381.189	77.39	1667.39	2118.39	2349.91	2219.87	2258.63	2918.42	5928.8	4705.97	1240.78	1729.75	6507.45	3976.11	3244.72	2538.93	2567.18
M385T795			0.325579	1.77837	0.180356	384.978	794.663	875.338	888.322	1951.27	1228.08	1599.73	1136.65	1253.24	679.011	4478.3	1025.87	4124.88	2095.51	1133.65	1168.4	1168.18
M589T67			0.530777	1.77827	0.0452691	589.365	67.422	3682.84	2271.27	2775.45	690.398	1758.56	3926.06	3715.82	3519.21	4032.35	4257.55	3424.48	7910.61	2196.02	2194.96	2073.27
M746T544			0.358338	1.77719	0.00484791	745.936	543.544	519.441	507.878	729.518	986.731	1481.95	834.529	1746.94	1528.43	1813.63	1455.25	1121.03	1327.37	1167.91	1119.71	1168.79
M520T213			0.767524	1.77662	0.295439	520.331	213.249	19964.8	7250.96	15595.1	15737.9	17409.7	4707.56	9409.95	67305.4	26451.9	9909.09	10121.6	20114.9	7045.43	5409.32	7053.49
M665T316			0.283122	1.77582	0.0179984	665.076	315.804	578.562	1070.26	2031.86	657.716	1835.4	1550.46	1977.19	2699.4	3000.96	1336.06	2660.63	2042.61	957.173	792.086	914.732
M443T79_2			0.388903	1.77484	0.0952002	443.292	79.373	161.774	887.856	1726.6	1120.45	1633.73	1639.34	1630.32	604.682	2216.41	3742.63	1758.14	2772.97	2482.66	2112.89	2329.68
M256T36			0.170675	1.77317	0.472461	256.068	35.9465	3971.6	3332.78	1753.21	1714.07	1224.63	827.664	2562.98	3142.14	14373.8	702.088	943.763	1014.31	685.447	705.5	685.499
M125T179			0.531971	1.77304	0.0174406	125.096	178.987	1664.89	1970.66	2623.35	846.796	3067.92	1175.82	2524.8	3830.68	4550.88	1988.12	3570.72	3657.83	742.159	722.5	1109.81
M274T40			0.199586	1.77198	0.00522947	273.953	39.528	396.001	291.065	268.407	356.861	381.244	360.197	757.361	738.242	317.638	736.943	592.153	496.914	286.651	300.955	300.508
M578T80			0.534193	1.77196	0.0852143	578.286	80.1475	272.281	671.352	3951.47	1268.87	2786.11	3470.21	2689.91	1917.29	3945.81	4697.38	3156.58	5601.35	2465.06	2935.99	2552.16
M296T71			0.524466	1.7717	0.0513412	296.265	70.8125	3024.31	1300.59	1230.17	1574	1222.21	3059.59	2017.97	3603.23	2923.45	4770.86	1844.24	5056.97	2544.55	2640.09	2639.87
M525T813			0.264131	1.77104	0.15599	525.041	813.387	398.216	1349.91	874.983	428.967	217.911	646.732	972.054	2269.77	1562.21	1137.9	294.6	700.124	588.365	501.576	497.616
M137T642			0.82243	1.76839	0.212551	137.07	642.078	7748.45	4856.32	4548.18	10750.7	8029.34	6327.57	3652.2	10381.4	15159.7	10194.7	5019.76	30325.3	5093.9	5113.6	5324.16
M702T1044			0.789141	1.76825	0.209127	702.495	1043.63	6426.37	7383.36	4223.32	7609.92	6059.87	3840.34	5492.45	12039.2	6883.2	26245.9	4509.26	7679.38	6236.54	6236.62	6108.7
M907T1263			0.444594	1.76737	0.0771042	906.845	1262.95	2280.39	2325.56	2529.36	570.213	564.465	1765.12	2032.18	2262.65	1522.36	5000.43	2879.32	4038.79	1846.41	1995.89	1992.87
M304T485			0.403042	1.76715	0.299004	304.211	484.514	5061.34	4500.59	1214.22	790.925	685.242	1645.77	9666.9	978.734	2084.84	2306.85	7117.23	2405.42	6175.33	5655.2	6173.88
M785T81			4.84629	1.76692	0.0693644	784.58	80.744	280324	198936	169660	102276	212604	366434	223485	214629	483470	470484	281507	676844	248062	244284	248064
M367T51			0.507647	1.76653	0.322982	367.153	50.762	2130.6	1220.73	2379.95	2327.88	1142.14	3919.72	1486.08	2213.34	1666.11	4143.46	2254.42	11415.2	3034.16	2382.23	3932.12
M962T778			0.657953	1.7665	0.0987503	962.347	777.966	2603.6	3013.32	3139.52	1451.75	4089.15	6415.33	2158.31	8417.91	4292.38	9576.44	3528.5	8615.44	6353.03	5809.36	6350.55
M688T232			0.62805	1.76629	0.0228222	688.489	232.293	4044.62	3389.3	1711.88	1959.2	2003.04	2392.77	3611.06	3375.69	5785.72	4011.05	3455.95	7139.5	2590.34	2154.12	2575.29
M552T793			0.262133	1.76591	0.0571747	552.073	792.914	393.013	666.575	493.198	609.352	388.049	812.865	473.002	1114.03	710.421	1112	749.393	1780.01	567.461	585.511	567.043
M836T771			0.420647	1.76541	0.0338329	836.286	770.626	772.503	2038.35	1613.04	1472.45	1525.33	1282.12	1422.14	3392.51	2122.65	4007.08	1601.67	2819.72	1627.28	1606.9	1361.48
M77T1257			1.26389	1.76534	0.163226	76.9694	1257.29	18107.4	17556.7	35236.5	876.976	22555.9	12568	35464.2	16256.6	31554.8	20336.2	67098.5	18006.7	25261.3	24099.8	25270.4
M273T895			0.803357	1.76528	0.0458333	273.001	895.403	3041.14	8008.77	5154.84	1172.08	4756.83	3028.84	5186.96	9779.77	10419.1	7414.77	3921.65	7696.5	3898.37	4129.81	4116.58
M677T42			0.276356	1.76485	0.152343	677.296	42.431	928.14	952.757	987.975	615.49	569.322	1218.12	1071.64	3632.86	977.099	1308.87	955.064	1358.43	451.967	429.743	452.371
M233T692			0.373058	1.76484	0.00516184	232.924	691.735	806.811	513.608	1529.43	995.945	868.516	570.693	1757.62	1674.08	1578.22	1756.18	1001.7	1559.38	1097.55	1184.95	1097.94
M535T1004			0.125386	1.76464	0.179728	535.015	1004.26	53.7851	254.871	174.739	27.5102	57.8867	303.79	239.064	526.233	153.788	282.735	95.5918	242.379	32.0882	60.2099	80.349
M365T277			1.33777	1.76403	0.111023	365.208	277.312	3974.48	29290.5	9378.78	4571.17	8451.54	21540.2	14902.4	25791.7	10107.3	21262.8	29068	35062.9	14199.5	13993.9	13465.7
M603T316			0.240627	1.76375	0.0432817	603.448	316.169	414.886	312.123	506.391	567.521	831.62	729.656	1156.71	634.221	1611.68	776.859	1211.81	538.787	610.063	613.082	636.404
M494T285			1.2024	1.76212	0.00165858	494.119	285.413	3760.5	8825.52	8745.42	7157	12106.3	13723.5	15282.5	13837.7	16074.7	15688.2	15619.9	19212.4	10959	11760.4	11742.6
M759T308_1			6.8799	1.76199	0.0591425	758.568	308.451	602643	595317	360928	303474	446933	538057	484670	718487	952758	686614	593158	1.58133e+06	563499	567903	567904
M358T79_2			1.19008	1.76166	0.00528112	358.24	79.318	8219.3	12477.8	11453.8	3173.01	7058.95	10134.6	12284.2	15446	21220.2	14849.8	13248.1	15469.3	8043.49	8254.08	8041.73
M985T720			0.382273	1.76156	0.165301	985.425	719.911	1108.74	481.99	438.286	1421.33	1464.81	2196.26	3176.75	2301.58	439.24	3704.62	639.067	2265.93	3400.19	3395.73	3504.7
M739T49			0.477447	1.75999	0.0979236	738.582	48.622	1409.5	3441.5	2094.89	1203.81	1749.03	2070.93	2275.89	6844.22	1790.91	3736.04	2278.71	4140.66	1654.29	1631.71	1654.48
M807T212			9.64172	1.75946	0.0967108	806.568	211.981	151937	223503	3.10434e+06	3.14532e+06	1.06031e+06	799038	2.18829e+06	3.1764e+06	1.94239e+06	2.33854e+06	2.64202e+06	2.64044e+06	1.35189e+06	1.81928e+06	1.81514e+06
M336T36			0.0634288	1.75765	0.489671	336.024	36.043	1025.18	789.079	266.356	681.08	322.689	45.7266	493.398	583.855	3524.17	61.7241	178.976	659.516	33.2543	44.8318	37.1367
M258T65_1			0.209162	1.75754	0.396377	258.133	65.232	850.846	1316.93	911.992	2156.63	856.29	3247.25	1812.65	486.095	8355.33	601.811	796.854	4362.53	1728.62	1711.73	2073.12
M632T776			0.688999	1.75694	0.0851858	632.06	776.33	1368.09	2468.05	1723.76	7457.41	5279.82	4982.92	5490.93	9492.22	4496.79	9124.75	2871.5	9425.38	3547.74	3834.61	3841.1
M217T857			0.331038	1.75619	0.0412143	216.984	857.095	613.799	1180.58	1711.97	1264.67	1642.63	2083.79	1150.09	1703.37	3869.73	2340.26	2583.1	3276.55	1133.08	1198.6	1196.45
M843T355			0.736466	1.75539	0.123602	842.643	354.653	1906.55	4258.62	4458.55	3206.8	5484.44	7540.23	2573.53	7550.96	5204.55	9871.81	6271.86	15668.6	4294.11	3569.27	4286.22
M546T876			0.1958	1.7553	0.0753695	546.109	875.923	491.793	791.065	554.08	422.344	1317.15	582.398	425.447	1179.67	1989.96	1532.41	1390.71	781.815	852.546	898.211	897.564
M305T796			0.384363	1.75421	0.0313606	305.028	795.597	1834.46	468.828	902.978	1298.66	748.14	840.749	818.794	1581.78	1671.62	1921.76	2412.36	2283.54	605.153	586.231	722.092
M343T69_1			0.214193	1.75334	0.192046	343.097	68.895	634.044	937.211	314.699	2008.07	514.242	304.334	1544.3	1604.63	1849.18	440.725	383.147	2440.83	617.043	796.466	608.154
M388T132			1.14425	1.75194	0.190021	388.254	132.102	29010.5	17600.1	24668.8	34736.8	81144.7	24141.1	26449.2	92349.7	127339	38687.9	32540.3	52821.7	13778.6	15934.8	15999
M987T778			0.439232	1.75084	0.0848569	987.343	777.953	140.791	413.632	2341.03	2863.1	2743.25	3284.6	3068.8	3957.28	3024.9	5859.94	2191.14	2534.06	5026.71	5005.73	5229.43
M715T261			0.546526	1.7505	0.0986377	714.506	260.555	3146.91	1635.03	1763.96	1636.64	2322.78	2585.38	2106.35	2629.54	2400.22	4078.69	3888.75	7811.73	2863.68	3157.18	2861.66
M331T273			0.356005	1.74908	0.0457147	330.995	273.202	1069.01	1226.48	589.999	1304.86	621.896	1732.11	2817.51	1012.12	1230.67	2778.91	1933.84	1673.54	1693.7	1683.05	1869.2
M833T674			0.601796	1.74806	0.00632275	832.899	674.262	1555.51	2839.24	4276.93	3637.06	4386.56	5088.04	7877.07	5281.11	4455.81	8015.39	6848.02	5601.17	6559.05	6554.84	7135.2
M217T728			0.434148	1.74683	0.0228687	217.029	727.886	2109.78	668.316	1281.99	1499.64	936.607	1633.96	3227.44	1671.91	2182.42	1914.32	1776.85	3429.27	1883.72	1757.29	1882.65
M501T689			1.18306	1.74644	0.147992	500.991	689.103	9542.42	16808.6	9464.39	25887.1	20478.1	5794.08	37668	27729.3	13749.4	48941.2	11946.1	13608.7	36758.9	34546.9	34537.4
M267T518			0.301976	1.74593	0.17312	267.009	517.514	2013.43	591.98	1247.71	733.721	418.24	848.503	2948.49	1086.15	875.111	1460.39	3134.21	715.613	2917.97	2915.68	3030.09
M607T48_1			0.504446	1.74479	0.188351	606.553	48.117	4526.81	4958.43	6899.58	4020.39	2955.77	1737.72	8749.9	1032.6	9015.24	14810.4	8254.18	1929.72	2965.92	2825.86	2822.25
M226T66			0.313551	1.74461	0.172056	226.199	65.99	3177.13	2763.65	1785.88	3348.49	2213.96	1813.42	959.001	3327.32	10087.6	4195.94	3392.63	4385.58	4607.71	4556.41	4242.53
M505T735			0.774027	1.74452	0.0154621	504.888	734.703	3483.91	1266.02	7194.31	6864.81	6549.4	5837.95	9851.66	10442.6	6129.93	11106.5	6268.37	10623.8	11685.3	11671.9	12664.4
M383T667			0.270686	1.74323	0.0260248	383.223	667.061	546.109	197.822	609.995	988.546	759.581	859.595	1457	1008.55	760.74	1183.58	808.016	1688.19	2403.18	1597.78	2400.18
M264T667			0.313633	1.74323	0.0267793	264.039	666.639	1454.96	802.196	1591.79	1098.19	2234.74	1049.7	3317.09	939.399	2313.1	2624.55	2922.93	2232.47	3269.16	3280.16	3475.54
M707T315			2.10234	1.74314	0.0438048	706.536	315.431	78788.4	60372.6	28433.6	37287	34157.2	32743.6	55419.3	59306.2	108470	79505.6	50060.6	120994	47313.5	47523.6	46508.4
M809T721			2.34778	1.74226	0.0122924	808.938	721.125	64988.9	15649.4	83248.7	38968.7	44826.9	90332.5	130013	106604	85866.3	94710.6	80848.9	90867.6	97822	97049.6	112404
M267T644			0.26627	1.74214	0.0378719	267.137	643.758	889.522	820.74	1033.57	886.103	745.936	910.171	992.984	1559.23	916.742	1096.79	2109.12	2534.17	929.822	812.999	885.889
M1010T693			1.4686	1.74203	0.0827184	1010.03	693.412	33585.5	10149.8	21127.3	13628.5	13776.7	19838.5	24271.4	31605.4	9916.14	45504.9	30344.4	53650.4	23537.6	19803.3	23560.9
M372T74_2			0.806173	1.74194	0.00981322	372.148	74.313	3239.09	5309	3735.65	3512.34	3192.26	6404.67	5491.87	6002.7	7559.53	8850.8	5751.08	10577.1	1947.82	2863.27	2890.57
M259T772_9			0.307358	1.74164	0.15811	259.434	771.507	3433.25	3524.1	1841.73	7362.24	1761.84	1370.52	4311.04	975.218	7765.34	6544.17	9832.17	4174.76	4594.66	5358.82	5315.62
M292T51			0.256062	1.73963	0.0211146	292.442	51.069	661.208	919.591	581.083	217.54	218.591	867.783	1346.96	1037.01	632.68	926.192	1019.14	1067.22	607.877	623.177	629.909
M811T75_2			0.729852	1.7381	0.0357158	811.493	75.1315	947.368	4577.52	6218.07	8066.91	6964.03	4060.76	6569.39	9395	8376.43	8167.89	6710.28	14374.6	6869.7	6862.97	6686.27
M207T36_3			0.366164	1.73809	0.397904	207.044	35.977	2540.64	1420.8	1796.26	4151.7	3535.61	1330.47	2829.45	2768.74	14235.9	1518.25	1871.44	2457.32	1606.8	1411.65	1605.26
M761T258			0.323405	1.73797	0.086276	761.494	257.543	1219.06	780.147	650.948	390.706	472.789	1343.19	660.837	1035.38	1136.47	1398.45	1631.57	2578.35	1350.3	1472.34	1348.1
M581T441			0.43215	1.73539	0.0401117	581.13	440.942	2007.54	1502.68	3645.24	1600.54	1264.23	3629.39	6090.76	1980.92	3147.46	4195.86	4222.47	4050	6141.06	6283.98	6283.86
M228T264			1.64262	1.73457	0.0993571	228.028	264.18	936.153	13047.4	18007	36613	22244.9	23363.4	34870.1	24432.3	22485.7	50354.8	15856.2	50109	9244.86	10276.7	9989.45
M605T568			0.456695	1.73423	0.437787	604.941	567.65	6979.03	6337.12	2848.35	1477.34	3135.54	2273.48	885.85	501.184	19959.8	13857.1	3680.46	1090.99	7661.89	8304.63	8300.55
M619T47			0.160729	1.73162	0.171957	619.289	46.661	916.571	623.208	322.968	816.843	873.08	398.991	494.459	1886.66	2309.73	761.364	602.297	788.273	914.124	949.5	912.845
M904T47			0.299381	1.73114	0.0289986	903.742	47.089	1743.83	866.614	302.224	717.548	587.91	1003.98	1583.91	1081.17	1500.27	1483.42	1244.92	2146.5	1403.62	1342.11	1336.71
M611T801			0.285098	1.73071	0.0375402	611.229	800.97	621.492	1326.18	2466.81	1206.79	715.724	1132.83	2180.68	922.093	2831.01	2121.69	2477.97	2394.66	2028.16	2070.4	2028.31
M365T229			0.561127	1.72937	0.140642	365.063	229.219	980.699	2561.33	1268.54	5410.13	1928.73	2637.46	3970.84	6768.61	1143.56	2608.94	4289.22	6790.88	584.926	752.798	570.221
M69T64			1.77631	1.72871	0.176415	68.9953	63.9125	29285.6	42537.7	34942.2	18559	29537.8	33517.8	50820	128981	35477.6	40749.2	24320.2	45305.6	19701	21226	21259.5
M880T48			0.512336	1.72762	0.0699751	879.669	48.113	2367.59	4355.38	1385.88	1664.35	3284.78	2437.4	2071.74	3607.64	2634.25	5957.12	5426.92	7072.43	2898.23	2894.82	2655.46
M590T75			0.337308	1.7275	0.0350319	590.343	74.618	470.291	1352	1558.19	534.887	1184.58	956.071	1897.6	1696.51	1372.04	1612.44	1076.63	2806.54	1365.86	1254.61	1208.95
M679T829_2			0.306198	1.72728	0.0194783	678.708	828.585	743.261	552.297	705.595	661.63	674.498	1329.33	1818.52	1580.58	1453.36	1469.88	648.684	1089.52	936.368	992.288	988.871
M346T183			0.328761	1.72663	0.0103576	346.241	183.203	1230.51	377.809	540.551	909.704	741.841	567.755	1486.87	1328.57	1613.08	941.124	1218.32	954.257	561.473	559.554	609.03
M1068T638			0.998973	1.72655	0.127282	1067.51	637.726	3918.68	8481.61	5524.47	9802.47	5346.01	9939.56	8022.45	10884.7	9362.41	14202.6	5821.95	25969.6	5983.82	6101.17	6692.22
M283T732			0.535191	1.72554	0.0101478	283.034	731.635	1429.04	2502.68	1762.97	1874.6	2549.75	1374.63	4562.55	2408.86	3411.12	2554.78	2581.54	4313.92	2719.3	2690.75	3056.22
M1198T46			0.0849533	1.72554	0.354744	1197.82	46.423	345.895	588.076	154.711	639.956	497.144	222.709	330.561	583.472	2148.31	545.939	212.676	404.01	595.352	487.726	488.284
M486T50			0.613477	1.72363	0.212464	486.321	50.495	8116.33	4831.04	7468.32	2273.17	2386.09	8895.55	1110.25	4900.38	16491.6	19396.8	7824.74	8828.67	8333.45	8217.91	8047.15
M274T54_2			0.277476	1.7233	0.0811341	274.163	54.227	900.037	670.178	1611.68	1489.73	1056.49	423.521	707.416	2108.61	1720.66	3116.55	1681.77	1266.12	1665.88	1608.86	1694.7
M269T72			0.300216	1.72193	0.109919	269.151	71.82	494.309	815.644	669.379	891.895	771.021	2444.54	2345.03	2006.25	406.236	1446.53	1964.09	2312.88	786.552	569.356	607.879
M261T796			0.653291	1.72119	0.142682	261.001	795.696	3857.88	4917.54	5877.21	3024.26	5844.52	5671.04	2942.87	3478.01	15922.5	5761.66	12949.3	9191.51	4119.72	4119.01	3951.29
M209T548			0.291213	1.7202	0.0228196	208.984	547.697	331.263	573.569	841.928	598.627	784.481	465.006	1369.39	694.683	537.681	1311.63	1038.98	1231.55	1461.32	1638.75	1641.75
M617T444			0.444148	1.71844	0.00769047	617.272	443.995	1077.45	1495.49	1399.14	692.711	2328.53	1200.83	2749.85	2572.8	2919	1768.45	1901.56	2169.5	1205.03	1100.87	1104.42
M385T37			0.372371	1.7183	0.600522	385.046	37.139	5662.78	1541.26	1473.56	6472.34	3594.42	1264.54	846.291	1604.15	27366.8	1134.3	1635.33	1794.37	619.004	774.095	614.431
M544T49_2			0.339596	1.71768	0.266751	544.47	49.314	3964.63	3399.41	5839.24	4657.73	21777.8	472.33	15432.4	16703	15605.8	1198.51	14429.4	5528.94	16436.9	16432.1	16629.2
M323T288			0.461526	1.71699	0.0666745	323.044	288.275	913.463	1256.91	1079.4	2701.02	2631.75	2526.56	3783.51	847.694	4444.18	2902.03	2798.97	4297.78	1949.32	1964.59	2322.77
M763T186			1.35306	1.71622	0.169354	762.506	185.664	3934.64	2045.33	26487.9	33440.6	16130.9	25658.6	6401.26	42721.7	34436.5	54531.8	21059.1	25683.4	16464.2	17097.1	16823
M654T78_2			0.546156	1.71596	0.0446666	654.37	78.284	2770.14	2668.82	1449.29	1464.66	1243.45	2787.94	2398.47	3737.69	1969.53	5172.19	2808.98	5164.07	1549.69	1554.42	1662.62
M442T391			0.140007	1.71519	0.468032	442.351	390.73	5806.49	8148.09	8620.28	2027.63	7864.14	4962.42	3937.31	3218.36	39340.4	1696.67	8385.11	7620.19	3816.84	3817.5	4011.5
M691T359			1.1055	1.7136	0.137892	690.561	359.272	10769.1	15110.9	10690.7	37095.8	26153.3	12581.3	21926.1	32629	59622.4	28740.8	8840.33	40852.3	37143.1	45506.7	45504.8
M878T47			0.53282	1.71206	0.0338548	877.725	47.376	2448.84	3756.56	1024.65	1532.72	2339.39	4100.91	4302.41	4132.81	2328.52	4330.85	4401.16	6532.83	4084.31	4081.94	3948.14
M198T59			0.539009	1.71193	0.234792	198.04	58.661	3181.59	3205.94	5594.41	1227.31	1599.7	3459.1	2787.55	1871.83	4227.7	2217.97	9182.8	10985.7	1985.56	2182.3	2182.99
M809T639			1.48707	1.71191	0.119106	809.021	638.849	16164	22961.1	23494.6	20062.4	22422	16765	21755.9	63945.8	20284.6	58363.5	21273.2	23006.3	15055.1	18666	18519.1
M807T151			1.42316	1.71004	0.363442	806.568	150.951	66160	92050.9	1.14215e+06	279907	363366	170860	537496	455855	461655	261833	1.60432e+06	294717	295802	238786	238667
M404T728			0.783603	1.70969	0.34624	404.103	728.128	1940.18	1688.21	3283.51	4195.91	3602.78	15843.2	9335.29	5092.09	3389.7	6799.77	4861.68	22758.9	8491.43	8402.96	10037.3
M526T379_2			2.34224	1.70911	0.163312	526.292	378.565	84483.5	81487.3	45659.6	23308.8	43467.7	37185.9	192461	105423	57839.9	88234.4	46125.4	49299.7	85891.6	83569.4	83508.4
M378T51			0.72769	1.70881	0.327005	378.312	51.075	4587.08	5595.03	37288.1	4287.37	40455.2	2833.38	41753.9	35018.1	2299.27	1283.65	38422.6	43637.9	19341	19274.4	3521.3
M505T672			0.297873	1.70839	0.0442377	504.888	672.482	211.569	652.324	980.444	822.701	1714.94	1540.27	2240.38	914.531	1362.76	1876.83	1648.6	2074.4	2094.47	2192.5	2192.93
M619T436			0.19865	1.70797	0.0177616	619.155	435.978	660.249	453.034	649.745	783.485	671.352	424.103	1019.29	687.387	1109.4	1455	1350.76	598.539	845.975	812.409	813.854
M863T656			0.88632	1.70793	0.0191528	862.506	655.63	3433.66	4754.22	9344.01	2570.78	9282.88	7435.14	8114.35	9834.57	10475.4	14516.3	11730	8216.78	8301.16	9192.1	8515.68
M288T363			0.242538	1.70765	0.0382376	288.088	362.902	485.751	396.14	546.769	559.964	594.5	860.062	1076.57	635.397	1654.05	1100.66	700.159	712.917	785.056	832.259	784.941
M992T776			0.580424	1.70723	0.0607321	992.261	775.69	1091.74	3552.76	3383.83	3160.85	4084.93	5436.87	4203.95	8558.24	7842.52	5512.22	2081.71	7159.75	2748.23	2205.73	2224.27
M476T331			0.0762329	1.70653	0.467739	476.37	331.149	4920.14	631.94	8772.49	1871.14	5695	3612.58	4317.7	2769.61	25719.7	1383.6	7415.05	1916.51	3520.43	4239.7	4248.92
M448T63			0.306008	1.70568	0.0147117	448.211	62.794	1167.28	475.927	572.792	361.254	775.689	439.987	1035.22	1090.1	1315.21	819.185	1347.23	862.572	659.876	714.954	1084.09
M789T48			0.530781	1.70518	0.037086	788.637	48.3295	2371.78	4424.68	2534.64	2732.9	830.575	2899.99	3645.48	3574.35	2733.55	5295.65	4761.14	6922.4	3056.85	3011.65	3010.64
M650T689			1.56638	1.70446	0.109063	650.493	689.34	11861.6	19232.6	6257.31	34169.4	45302.4	24383.3	42079.4	30415.6	46548.9	53015.3	9303.61	59318.1	21341.1	26052	21426.8
M579T312			0.318642	1.70423	0.062288	578.519	311.957	2000.6	1225.05	1418.16	1508.21	1437.55	963.151	1594.04	4303.97	2521.91	1280.3	1831.29	3044.32	1771.68	1948.31	1797.27
M289T815			0.416291	1.70336	0.0348023	288.948	815.35	1543.12	1095.42	1311.88	1158.69	1672.03	2020.95	2216.48	1348.57	4088.99	2439.65	1813.38	3086.03	2284.11	2281.96	2359.11
M842T301_1			1.98061	1.70326	0.173964	841.576	301.377	18100.6	25177	65473.3	29257.7	71810.1	88276	124859	152434	35570.2	44606	40175.7	110089	37785	37633.7	34579.5
M815T306			2.63093	1.70303	0.53939	814.557	306.144	6590.84	32108.4	39163.5	21272.3	142900	138895	31993	69438	44608	42355	25268	435075	38229.4	35437.7	37799.1
M537T316			0.220299	1.7027	0.0389096	537.123	316.051	1009.82	1031.22	1122.41	575.662	1074.34	1538.74	1224.86	1721.03	2945.4	993.547	2207.44	1723.58	954.777	872.207	953.845
M603T673			0.416791	1.70212	0.000245393	602.921	673.204	901.915	1478.23	1672.1	1468.8	2122.56	1791.91	2645.63	2743.77	2634.27	3128.41	2298.16	2610.11	3475.89	3487.53	3727.39
M785T687			4.04007	1.7012	0.0712856	784.977	687.12	158402	85047.4	267713	305301	313370	314410	273582	333219	627328	651929	317660	253232	423025	363108	362119
M454T567			0.411648	1.70119	0.0287234	454.345	566.8	2821.6	206.008	2770.91	1935.49	2833.92	1939.79	3361.28	2260.79	3947.57	3245.12	3280.37	5182.83	3673.03	3627.44	3672.51
M947T47			0.307238	1.69929	0.203336	946.767	47.376	621.078	2182.53	114.235	614.985	232.26	1351.67	1272.58	840.304	702.057	2074.94	1217.76	2587.24	1708.27	1657.13	1659.61
M245T73			0.503539	1.69927	0.0876313	245.06	72.563	1429.3	2692.4	4524.05	3654.27	1664	922.258	2047.69	4726.57	5618.46	6028.01	4847.57	2027.5	4081.7	4469.02	4470.49
M705T314			1.52536	1.6991	0.0583059	704.521	313.778	44716.3	34950.2	24996.7	30627.4	39588.7	21387.7	43967.4	43145.6	86430.5	36612.8	35476.2	87845.5	29327	26911	26904.3
M555T74			0.372196	1.69771	0.166867	555.436	74.412	1408.06	1387.64	1143.96	751.106	1247.22	407.862	970.22	3048.61	404.15	2909.88	972.372	2468.2	1999.96	1997.45	2114.18
M466T74_1			0.477916	1.69764	0.244169	466.244	73.586	6050.62	15568.8	2593.37	12978.3	3399.55	4121.3	2511.05	17613.3	20898.1	1625.42	12672.9	20584.3	12189.8	6193.52	12140.6
M95T803			0.443683	1.69748	0.152662	95.0594	803.475	1793.02	4911.21	7298.04	1999.27	1147.7	2969.46	2129.49	1958.99	7693.54	8321.91	7260.21	6786.88	2013.83	2639.74	3157.38
M717T736			0.282358	1.69709	0.103872	716.815	736.239	348.354	78.4863	1123.55	1508.28	839.148	940.909	1835.8	1013.02	978.022	2085.93	648.514	1650.46	3121.79	3038.52	3123.97
M579T776			0.320325	1.69639	0.162669	579.184	775.858	436.043	1544.01	1409.1	753.635	866.042	943.326	838.19	1262.91	2273.31	2978.3	292.895	2451.57	1137	1107.07	1107.03
M773T82			0.697868	1.69612	0.0372436	772.527	81.885	973.125	5294.98	3458.98	4782.38	1834.88	4826.1	2997.69	5884.05	5651.5	7743.51	5791.91	7839.05	5685.92	5506.23	5507.09
M823T634			1.31637	1.69568	0.11959	823.008	633.612	12404.6	19239.5	17319.8	9222.18	18558.6	14750.9	20659.7	20427.4	23484.4	54284.8	11055.3	25236	36622.5	32447	36383
M253T40_1			0.663959	1.69531	0.491668	253.017	40.155	16831.4	8068.36	6789.9	2042.19	9549.28	3259.32	4996.47	10466.5	48980.9	2782.85	5067.11	6606.5	2626.9	2720.45	2717.04
M465T793			0.288242	1.69505	0.0108816	465.098	792.68	495.099	1452.52	782.621	1124.82	640.984	1258.7	1244.41	1128.91	2070.71	1844.97	1718.8	1746.79	1040.33	946.262	945.408
M766T298			0.610247	1.69492	0.208045	765.557	298.11	700.619	288.515	5771.32	3418.21	3247.44	3718.11	1556.09	5963.71	2436.64	4782.01	4352.98	9966.61	4183.28	4201.03	3915.16
M137T669			0.3735	1.69447	0.133924	137.07	669.009	7242.94	3514.57	2027.9	4416.8	4186.67	4647.3	3625.57	3521.04	13162.6	3896.91	9899.26	10012.2	3769.29	3276.39	3424.88
M275T755			0.65834	1.69377	0.16378	274.909	755.303	2988.28	4132.32	5773.33	6516.84	5442.66	6391.68	5726.35	19387.4	6149.06	7077.72	3568.43	11013.1	6164.27	6441.49	6442.68
M328T467			0.353018	1.68936	0.258903	328.213	467.03	1952.76	1059.4	2218.47	2254.41	1989.19	1634.95	8341.93	2401.83	1516.95	2074.06	2332.63	2099.99	1924.84	1872.94	1721.32
M522T386_2			0.651476	1.68933	0.465387	522.281	385.959	7317.8	4785.67	6482.91	3308.17	9637.11	1987.18	8411.57	4467.36	3540.22	3191.66	3188.56	33825	4957.75	5336.08	4971.97
M282T516			0.61565	1.68916	0.356086	282.048	515.554	9591.7	9209.99	3306.32	3444.38	10249.5	3575.23	3808.33	3865.32	14386.7	4577.24	8076.09	31800.6	3702.06	3694.31	3525.48
M181T504			0.878103	1.68859	0.0280703	181.048	504.416	6074.8	4505.65	6501.39	2619.61	6627.64	7014.67	6614.58	7177.04	11249.2	12040	5779.83	13443.4	5666.13	5986.72	6215.71
M216T71			0.144674	1.68807	0.463115	216.121	70.644	438.09	197.477	209.093	344.411	2229.76	87.7746	314.162	422.743	184.897	451.954	2230.16	2315.5	610.893	684.3	1017.82
M206T213			0.648023	1.68642	0.351681	206.012	212.574	8779.26	10134.6	6618.5	820.226	6865.73	6964.26	8607.57	4847.85	7778.12	6189.83	33750	6591.07	6578.85	6598.47	6921.63
M758T354			0.720496	1.68506	0.0306112	757.619	353.737	5202.92	7855.79	9451.6	12332.6	11057.5	3082.54	8983.53	13065.7	16510.7	9349.28	15015	19615.2	10741.7	10646.6	10767.8
M541T69			0.256541	1.68501	0.309366	541.364	69.02	1213.7	1788.35	1030.32	325.122	947.466	1640.68	900.883	81.6326	5049.59	2612.29	1715.23	1343.82	1412.55	1541.6	1554.86
M444T293			0.367665	1.68474	0.0304172	444.105	293.194	1026.15	592.506	1255.48	1467.66	743.129	1389.36	1171.98	1062.04	2247.16	1716.37	2047.26	2662.71	932.948	716.269	934.515
M444T55_1			0.0665516	1.68432	0.49514	444.328	55.198	4426.22	4028.1	2283.17	7476.28	3705.37	3797.81	5742.62	1562.98	3466.41	1699.23	27396.9	3447.46	1913.57	1659.96	1667.21
M514T323			0.347082	1.68397	0.0842702	514.139	322.708	1161.21	926.218	1008.25	1478.43	872.51	460.88	1602.24	1776.64	958.405	582.074	2456.72	2571.96	659.422	639.958	640.103
M782T82_1			0.631313	1.68343	0.0561828	782.073	81.616	3069.39	1938.62	2520.64	3156.19	3624.64	7241.54	4390.11	5920.18	4130.77	6948	5214.34	9676.26	4277.03	4277.18	4311.36
M275T741			0.597361	1.68295	0.0350129	274.91	740.653	3869.16	2300.32	6472.06	6959.52	4960.24	7005.11	10054.4	7615.07	4025.51	9367.88	13374.1	8687.8	15988.1	13917.6	14026.5
M383T289			1.00679	1.68275	0.019364	383.012	289.424	1113.6	4223.86	9496.81	9215.49	9422.88	14156.6	15388.8	12582.5	11488.7	13394.7	13404	13889.4	15926.5	15927.9	15106.4
M341T665			0.317447	1.68226	0.025874	340.76	665.25	935.859	690.099	1422.48	1658.35	1262.4	1969.73	2701.26	1530.6	1247.14	2221.2	3042.63	2612.53	3215.96	3070.56	3216.18
M531T51			0.420043	1.68204	0.397485	531.362	50.7775	2601.84	655.777	1328.67	1202.2	6059.16	1567.81	5834.56	464.061	1104.49	2961.6	1863.88	10336.8	1157.53	1153.08	1315.09
M233T109			1.14565	1.68065	0.4688	233.058	109.15	6359.78	40992.1	6918.07	2191.89	7442.6	6572.31	12946	21974.4	2524.37	61720.1	6187.24	13095	12074.7	11720.2	11712.6
M224T645			0.43846	1.67627	0.0284028	224.127	644.897	774.11	850.22	1710.68	2288.87	2470.53	2543.55	3177.59	2741.15	1720.41	3555.2	2563.28	4074.42	4620.84	3971.87	3977.64
M492T577			0.523646	1.67477	0.0462837	492.301	577.052	342.24	4202.22	3772.68	3181.77	3616.93	3733.79	5486.35	5270.03	3300.95	3686.71	5443.33	8381.4	1190.39	1188.21	1143.84
M209T49			0.738689	1.67374	0.136592	209.189	49.2925	8773.88	10022.5	10747.5	5932.75	2677.15	976.375	6913.63	11793.6	8101.2	20932.1	10699.4	7053.66	11357.3	11448.9	11621.6
M291T77			0.499263	1.67363	0.228131	291.145	77.346	2711.62	1610.87	1508.45	1436.52	3561.15	3215.38	1484.75	2500.07	987.253	6413.61	3950.77	8168.01	2344.96	2156.71	2241.73
M702T565			0.598966	1.67319	0.0271518	702.495	565.308	4757.5	1335.74	5440.67	4663.19	7403.45	5407.33	9272.82	5705.88	4961.65	9943.9	10842.2	7809.17	10246	10248.6	10433.9
M545T403			0.255132	1.67277	0.335085	545.453	402.712	258.429	109.351	743.453	1397.08	418.235	946.349	325.239	1396.3	637.876	767.79	515.786	2835.47	226.048	295.444	299.368
M826T82			0.426865	1.67265	0.0761061	825.538	82.4965	1137.11	1500.21	1479.09	2232.34	791.852	1232.57	617.606	3068.41	1948.31	2808.51	1968.83	3593.74	2870.34	2352.77	2414.61
M476T193			0.70179	1.6725	0.252437	476.305	193.45	19742.8	11155.3	15160.3	15083.9	9283.3	12141.3	7834.59	56322.2	30070	8292.52	15358.2	20216.1	7285.76	7526.14	7529.59
M366T897			0.219816	1.67248	0.183603	366.096	896.644	1076.02	1038.61	1056.84	1071.97	1192.7	835.636	889.277	812.279	692.324	2555.98	3699.2	1840.37	1210.26	1244.11	1244.15
M867T48			0.4117	1.67163	0.0570066	866.693	47.971	1845.93	2914.42	778.05	690.102	1315.89	2148.45	2722.96	2229.25	1187.94	3191.3	3178.99	3692.39	2273.7	2341.09	2276.01
M784T306_2			0.419212	1.67118	0.225567	784.488	305.521	4387.01	2314.44	2971.88	3133.04	3557.48	3948.4	3844.97	14210.6	4347	2784.53	3909.81	4848.54	4465.75	5064.62	4446.79
M224T667			1.14744	1.67086	0.00229543	224.127	667.397	19673.4	6627.3	17626.2	16563.9	19120	22240.6	30352.7	27073.9	25244.9	29573.4	34945.8	22988.3	43732.2	43735.2	37891.9
M899T48_1			0.478328	1.67064	0.187643	898.687	48.2225	2532.24	5632.96	445.757	828.443	1664.94	2540.35	3366.83	2233.38	1850.48	4553.34	3728.44	7062.92	3553.8	3591.5	3479.19
M390T75			0.595909	1.67006	0.061944	390.286	75.346	5653.97	4933.93	3685.74	4550.63	9892.75	13984.3	15801.7	7394.68	12273	10412	16909.9	8522.38	8334.9	7933.13	8337.47
M628T869			0.307033	1.66921	0.34129	628.069	869.477	246.886	2717.52	1121.14	366.289	820.375	428.678	519.948	1043.28	2101.63	481.88	1557	3812.26	596.908	593.532	570.957
M695T330			0.544975	1.66872	0.015872	695.483	330.459	2109.65	2745.78	3986.38	2280.94	1985.66	3522.49	4420.6	6158.58	5099.77	4844.59	2161.63	5067.09	2789.43	2790.87	2908.16
M463T739			0.330495	1.66838	0.168795	462.877	738.528	814.137	401.201	1785.22	2130.91	2073.77	1803.41	5089.11	1814.55	1058	3453.37	1682.79	1931.97	4845.58	4798.34	5150.7
M785T82_2			0.526209	1.66755	0.0140846	785.082	82.465	1765.04	2884.92	4562.25	2731.09	1815.29	5483.12	4143.51	5042.74	6735.11	5221.24	4869.8	6074.09	3852.53	3860.71	3637.94
M175T1094			4.0061	1.66692	0.0596737	175.118	1094.17	185015	200653	245800	171724	160801	162098	245197	230484	315972	244233	247768	593451	223532	203439	174060
M851T640			1.07073	1.66664	0.234174	850.523	639.687	5184.07	8385.06	8867.46	17906.3	9885.85	16360.9	9072.16	12498.9	27399.4	11080.3	8951.31	41978.8	8864.77	9724.7	9742.52
M556T334			2.15585	1.66655	0.258117	556.316	334.004	70040.2	86887.2	83345.4	22282.5	73218	43414.8	207684	45070.3	52751.8	26391.8	208088	91948.5	116315	119737	119765
M310T70			1.04866	1.66593	0.069817	310.282	70.18	10320	7860.35	9485.99	8231.86	5479.89	7956.98	9601.05	12781	11028.5	20505.2	5978.67	22294.2	9526.87	9523.07	10328.8
M133T616			0.40053	1.66557	0.0499408	132.867	615.657	1540.34	852.824	1343.88	840.483	1825.2	2841.93	1780.38	1747.15	3841.46	3285	2187.97	2555.7	1641.61	1685.34	1640
M346T72			0.837762	1.66461	0.67727	346.166	72.074	64572	869.843	2510.34	12922.4	5938.03	2589.74	128605	1462.01	5788	1914.46	3218.27	7832.43	39053.3	40823.2	40808.6
M255T70			0.799997	1.66376	0.517418	255.064	69.602	17821.4	19617.8	3835.24	17523.6	16632.6	3370.72	10928	10547.3	84704.6	4026.04	8116.28	12783.9	6942.84	9071.72	9077.39
M753T308			0.615923	1.66363	0.0379324	752.519	307.625	4607.03	1994.41	5936.83	2219.73	6428.17	6262.22	9999.41	8012.46	5950.52	4950.81	6011.14	10739.7	3495.49	3350.12	3355.38
M278T74_2			1.65687	1.6632	0.0125057	278.344	73.957	18807.1	22759.4	23882.9	9367.24	19631.6	20212.1	25827.1	36102	27755.4	46289.4	21461.9	33267	28702.2	28712.5	30337.2
M740T736			1.30965	1.663	0.184732	740.491	735.774	8967.04	8582.21	13860.6	14652.6	10613.3	26649.7	14609.2	17146.5	11112.6	44340.8	13211.2	38149.9	31417.7	25113	25259.4
M978T689			2.00342	1.66259	0.0267683	978.005	688.528	65577.1	25677.3	50991.5	102550	20621.8	56518.5	77915.6	107555	98223.8	103477	72591.4	75485.8	73720.1	72933.7	73728.2
M165T690			0.722886	1.66224	0.171802	164.977	690.245	8366.69	4793.7	7470.56	7216.83	4177.35	541.782	5464.56	12363.4	17691.9	6612.35	8648.13	3353.79	6121.06	6496.97	6484.83
M241T35			0.302567	1.6615	0.26716	240.912	35.391	1859.55	1656.82	2530.7	693.816	778.325	1154.04	802.954	1288	3623.03	4781.41	3693.86	221.325	4227.34	4226.02	4452.37
M225T528			0.312971	1.66042	0.17983	224.958	528.061	469.092	1443.51	1600.34	1365.32	1996.16	1138.47	4571.5	958.754	1476.93	1766.53	3272.85	1258.19	1105.16	1101.19	778.435
M422T874			0.226699	1.65924	0.0584739	422.193	874.196	1551.28	1061.46	1129.99	2645.04	1975.14	1867.42	2728.56	2866.01	2887.25	2219.83	4866.37	1406.6	2778.03	2859.86	2781.34
M607T75			0.259853	1.65889	0.272975	607.465	74.6675	2738.48	2828.54	13268.8	2865.24	4145.24	2446.89	2133.92	11557.6	12854.3	6455.7	12002.7	1931.04	2760.15	7516.72	7449.83
M230T692			1.54175	1.65871	0.0225051	230.039	692.249	24436.4	9384.74	31018.1	14345.4	18277.5	16638.8	27306	28713.5	24089	27738.3	47414.5	33999.8	15907.1	15912.8	16709.4
M678T310			0.696215	1.6587	0.142678	678.466	310.039	5413.71	6343.25	5403.01	4143.95	5235.7	3064.8	2027.12	9089.73	6027.34	10217.2	5553.28	16190.3	6596.06	6664.23	6836.17
M291T795			0.455433	1.65866	0.0505525	290.955	794.663	1769.92	1818.39	1841.03	1444.29	2834.64	2400.26	2351.62	1928.66	5603.84	2554.98	4202.69	3442.16	2070.42	1980.45	1830.01
M127T356			0.185397	1.65861	0.314637	127.072	355.988	4350.79	1089.72	2004.34	1538.49	2749.2	1551.49	1008.79	595.526	6474.47	775.477	6464.64	6714.18	1388.28	1388.03	1289.07
M803T49			0.62682	1.65802	0.0829047	802.615	49.233	4774.07	7267.98	2506.1	1570.45	1776.26	4609.4	5442.18	3929.56	4357.3	7857.72	5929.53	9796.26	4283.41	4281.45	4336.36
M376T685			1.00425	1.65778	0.104625	375.965	685.025	2744.71	16467.6	34663.1	29693.8	28383.9	14930.4	64620.7	30716.9	29259.4	22153.9	32496.9	31097.3	52758.2	52803.4	41111.7
M253T796			0.352069	1.65729	0.146345	253.008	795.663	455.368	2267.35	1519.12	827.678	1990.87	1543.44	1268.51	1257	4596.6	1599.06	2960.06	2577.8	1550.17	1590.99	1566.79
M433T363			0.240408	1.65691	0.47279	433.105	362.917	2727.53	727.783	655.108	440.872	693.351	564.757	719.129	755.769	5432.18	601.152	686.151	1431.28	537.249	539.889	539.887
M576T328			0.374002	1.65676	0.133882	576.268	328.074	802.797	738.269	4576.22	1197.2	1994.52	1413.24	1893.92	2852.86	3366.72	4463.53	1784.96	3402.26	1549.34	1365.06	1397.58
M425T291			0.35089	1.65627	0.0850254	425.01	290.822	165.571	555.977	1579.33	1566.27	1744.76	2466.85	3262.66	2893.21	2409.96	1381.85	1503	1929.89	3256.9	3668.02	3147.06
M352T73			0.622359	1.65611	0.00109409	352.247	72.68	2299.02	2755.43	3486.54	2827.51	1974.17	2571.48	4846.83	5447.67	4240.52	3761.63	3288.69	4770.25	3375.07	3240.82	3373.47
M349T37			1.32638	1.656	0.524259	349.002	36.788	70940.3	41145.7	11829.9	15427	19783.1	3747.87	29680.6	33912.9	167726	2746.68	11462.4	24191	2541.42	2544.54	2586.74
M795T300			0.601382	1.65466	0.0820712	795.481	300.124	522.671	544.938	4512.69	5874.8	2869.78	4578.7	3174.23	4929.8	4490.78	5871.89	7126.73	5685.6	4710.23	5155.74	5191.12
M535T877			0.294577	1.65407	0.0545776	535.08	876.926	641.621	1151.36	1011.77	1532.98	775.132	697.1	793.055	1173.59	1863.13	2025.83	1272.46	2482.04	906.81	799.932	909.332
M739T731			0.40499	1.65356	0.00537568	739.417	731.345	1685.95	1115.85	2487.7	1449.51	2023.56	1262.25	2502.5	3341.04	2148.53	3559.36	2474.17	2551.03	3093.02	3081.19	2807.1
M675T586			0.268261	1.65354	0.0745762	674.869	585.668	966.771	1470.49	1842.72	1517	2181.18	1949.45	4208.88	1826.06	1787.22	2189.79	4486.29	1917.44	3219.23	3571.71	3573.55
M857T730			0.5916	1.65297	0.0102235	856.86	730.132	1897.64	2121.39	4935.93	4723.4	4354.93	3176.83	6012.18	6750	4792.54	7394.08	4164.03	5946.79	6556.47	6539.66	6184.84
M302T419			1.32065	1.6527	0.185387	302.195	419.446	19613.5	23336.7	13240	27905.5	12782.3	12076.6	14607.5	50537.8	13710.2	57165.1	15693.3	28355	15821.2	15816.1	16561
M607T369			0.272976	1.6525	0.0663103	607.057	368.689	705.983	144.258	2284.39	978.01	1544.52	1521.46	1625.06	1161.85	2588.97	1833.82	2136.45	2516.54	2185.74	1636.34	1686.4
M196T1330			0.618722	1.65215	0.0537852	196.025	1330.06	5156.51	2602.42	2878.96	2305.75	1815.71	4143.05	3827.45	7067.35	6060.88	4027.67	2762.33	7483.89	4433.55	5231.27	4518.05
M231T125			2.57473	1.65193	0.305329	231.044	124.931	105101	123448	59776	4367.13	33720.7	67585.2	94918.4	263522	42320.2	132092	18144	99861.4	65004.6	62786.3	64994.2
M170T61			0.320912	1.65129	0.388404	169.958	61.0765	1780.67	1498.43	1443.74	2271.88	2018.53	2516.77	1720.14	9916.05	1635.02	925.307	3035.32	1807.62	1988.8	1597.09	1970.53
M273T70_1			0.752152	1.64995	0.093647	273.055	70.202	3382.89	6308.11	4674.67	3900.24	3830.05	2838.15	3694.91	8042.94	4890.34	9968.43	3330.63	11212.9	3533.29	3517.2	3726.4
M998T937			0.171342	1.64994	0.127116	998.008	936.727	128.932	413.159	417.635	61.3119	632.54	434.304	247.697	385.127	673.12	679.841	489.705	969.38	335.237	354.773	335.107
M266T779			0.512236	1.64765	0.0949303	266.075	778.52	1636.34	3411.6	4205.07	5889.42	2768.78	4745.58	5388.84	5163.75	4705.59	11598.1	7036.97	3437.14	6850.33	6858.17	7730.25
M821T49			0.513947	1.64714	0.0991505	820.628	49.2565	3716.53	4726.98	960.97	1344.9	1298.07	3166.93	3183.81	3106.74	2844.26	5322.39	3772.23	6830.73	2597.3	2646.63	2596.09
M768T721			0.715435	1.64684	0.0561981	767.937	720.613	4283.68	4351.29	3786.03	7600.95	9532.16	9041.31	14951.8	7260.08	12197.1	8415.36	5886.9	14849.3	15326.5	15330.9	13770.6
M320T529			0.291286	1.64658	0.259798	319.994	529.22	220.953	1631.15	2668.39	465.139	2925.11	2149.22	6390.93	1588.41	2838.92	1559.22	2947.24	1239.74	794.463	694.613	692.551
M111T667			0.251361	1.64632	0.0278802	111.091	666.686	999.859	472.41	916.426	617.075	766.877	797.877	2083.34	992.665	1026.58	1117.49	969.184	1335.27	1179.22	1202.34	1033.13
M870T87			0.439996	1.64602	0.333358	869.559	86.8995	1461.96	479.097	693.788	5166.19	1202.06	1215.81	1015.85	2271.75	2992.75	3114.18	990.219	6435.76	3636.7	3332.03	3652.32
M87T137			0.667461	1.64574	0.00841633	87.0081	137.375	3752.5	3090.78	4461.35	2498.07	3816.54	5603.83	6594.71	4713.71	7493.93	8592.36	6053.51	4770.87	4620.9	4744.18	4739.93
M611T734			0.387031	1.64569	0.0901429	610.852	734.263	679.586	643	2303.68	2069.88	2672.31	3045.4	3395	4337.61	1894.54	4728.75	2663.41	1764.34	4867.19	4916.82	5203.74
M300T55			1.22535	1.6455	0.494658	300.251	54.83	2873.11	43868.3	18817.4	30457.2	1273.92	3299.36	3915.51	3103.87	30077.4	38786.5	2581.4	87055.6	14692.9	14705.3	4704.66
M889T777			0.720529	1.64467	0.0686187	889.162	776.816	943.892	4569.7	3709.1	7218.62	5045.14	7727.78	7211.28	10576.5	7200.28	10639.7	3114.15	9306.05	5048.89	5561.82	5019.97
M980T785			0.291996	1.64453	0.0388451	980.247	784.759	775.606	1094.9	1874.81	1452.26	1910.22	2962.78	3787.11	2627.53	3165.23	2363.57	3165.49	1452.46	2139.96	2145.63	1980.37
M819T49			0.624574	1.64411	0.0921047	818.615	49.239	5017.6	6082.44	2315.25	2295.06	2100.87	4839.13	4892.11	5877.96	4361.42	6185.32	4454.55	11468.4	4242.49	3995.92	3995.57
M757T308_1			2.1013	1.64318	0.0728203	756.551	308.072	58856.7	47560.7	51515	30220.3	48883.5	74606.7	47750.4	91576.2	95283.8	63807.6	60298.9	153368	60332.3	63876.9	60347.2
M417T510			0.343371	1.6431	0.316148	417.097	509.643	1640.03	787.232	1424.4	1204.22	996.637	4582.97	6772.69	1950.28	1328.48	1200.95	1745.29	4477.48	1495.88	1734.25	1729.95
M299T154			0.604	1.64303	0.176325	299.099	153.727	1682.1	10526.7	11575.2	9996.57	8634.53	8294.98	13507.6	28931.8	17315.4	9116.86	9012.5	5434.29	7647.26	10643.6	8873.81
M681T644			0.542523	1.642	0.0530675	680.514	644.061	1233.32	1173.68	2798.62	4816.45	3723.96	3681.29	4935.07	4848.76	2790.66	5172.95	3707.11	7161.1	8327.44	7950.35	8329.14
M477T415			0.25639	1.64184	0.103994	477.17	414.562	776.788	987.744	600.22	866.851	1003.84	1348.17	1249.44	422.288	1014	1747.39	2314.35	2419.92	1200.33	1252.21	1249.92
M592T649			0.614413	1.64138	0.0748858	592.028	649.473	4913.15	3239.18	2260.93	2090.27	5732.9	4207.59	11101.3	4874.12	5352.53	6076.26	3696.73	5738.16	4979.6	4765.13	4764.5
M891T640			1.33356	1.64096	0.0421151	891.024	639.517	7349.74	13081	15737.6	22074.5	10304	15762.9	15940.3	24879.3	18013.8	16416.9	26508	36590.6	17038.5	25454.7	17812.3
M318T603			0.422611	1.64086	0.0433805	318.19	603.448	2021.03	3688.25	2082.26	2228.53	2718.12	2335.2	2911.83	2373.38	4060.29	3486.7	5253.82	6647.3	1994.27	2036.34	2034.64
M211T503			0.307184	1.64066	0.00326763	210.953	503.064	805.694	477.952	742.845	868.166	649.489	1115.22	1381.16	1659.15	1310.48	1201.38	1085.08	1007.17	870.055	845.84	859.881
M844T371			0.901502	1.6406	0.0986565	843.654	371.203	5368.39	9931.42	11373.3	9491.97	12502.1	7492.69	7865.28	11811.3	14497.3	14558.6	13303	30100.3	7698.88	8145.56	8112.36
M202T407			0.26887	1.63963	0.182946	202.013	406.913	231.741	1597.33	1394.62	206.822	314.108	685.331	1297.69	1316.88	1381.2	1590.66	164.795	1512.24	86.4166	75.6601	75.8065
M679T310			0.363699	1.63899	0.0270798	679.458	309.836	683.102	1094.67	1300.73	1291.48	1138.03	1031.19	635.942	2279.78	2365.79	1837.88	1722.67	1875.63	835.251	980.186	827.313
M433T205			0.541409	1.63896	0.0512022	433.219	205.125	2543.4	1769.96	3938.1	1133.25	4073.95	6003.52	6055.97	4285.96	4530.04	5113.46	7866.19	4046.18	2899.25	2987.61	3300.5
M337T849_2			0.302755	1.63874	0.174024	337.117	848.942	2826.35	1677.49	1314.51	4090.25	1018.19	685.317	412.207	4850.57	2313.2	3854.81	4384.18	3214.22	4221.81	4276.3	4258.1
M247T679			2.33705	1.63802	0.049957	246.981	678.605	63374.5	52648.1	35117.8	37537.9	56438.5	32347.4	117538	54218.3	57690.1	39731.2	89354.7	95960	51513.4	61580.8	62221.3
M1169T693			0.873715	1.63799	0.160573	1168.96	692.56	9649.19	10431.9	10334.6	18681.5	13411.8	20093.3	27898.6	6361.66	17677.6	11213.3	29198.4	42951.9	14130.1	14152.9	13498.5
M267T316			0.750019	1.63674	0.0143813	267.058	315.613	10794.1	2327.94	6123.03	6235.45	9508.88	9668.94	11679.8	8004.81	13852.2	14666.4	12938.7	11952.3	7314.88	7703.46	7701.74
M593T305			0.542862	1.63614	0.0706809	593.356	305.162	2268.69	1686.32	2089.66	1154.98	3079.47	4759.24	3493.83	4296.58	3025.87	6619.51	2566.77	4602.23	2947.83	2805.97	2807.24
M573T63			0.488683	1.63548	0.392663	573.399	63.048	873.253	9113.75	1605.58	3256.31	2937.24	2034.43	3914.71	4141.95	4616.19	2619.63	1882.16	15241.5	2578.89	2502.21	2580.61
M271T698			0.639787	1.63472	0.037325	270.942	697.602	3444.41	3017.63	4427.31	3953.4	4923.64	3820.48	9268.19	2351.35	6155.93	8528.8	6743.47	5510.15	5442.06	5433.95	5152.7
M616T74_1			0.406889	1.63426	0.024592	616.361	74.3665	2835.28	2039.12	880.16	1064.23	1881.91	2622.6	2130.68	3056.68	2689.52	2828.28	3382.81	4417.24	2046.36	2143.6	2143.02
M850T47			0.422097	1.63308	0.0478551	849.693	47.418	1525.01	2912.35	772.855	1484.98	1568.75	2947.47	3915.14	1616.59	2458.95	3565.24	2735.15	4018.03	2600.25	2600.1	2804.68
M352T58			0.239184	1.63301	0.143112	352.319	58.303	821.263	653.005	718.365	730.956	373.906	508.469	443.571	1703.02	571.339	1052.03	1813.48	631.731	1436.74	1487.79	1436.51
M543T544			0.282453	1.63188	0.0333186	543.012	543.922	313.733	289.959	682.4	1039.66	958.462	1342.87	1615.26	1216.52	1193.46	989.401	1471.35	1064.83	1262.1	1136.59	1263.54
M277T856			0.163242	1.6312	0.102917	277.121	855.713	1423.13	647.41	797.019	706.449	884.687	809.173	670.467	902.821	1708.83	1192.76	2645.9	1472.17	819.331	818.89	875.009
M496T286			1.00607	1.63098	0.0257179	496.119	286.159	1434.36	7750	11896.7	6552.86	11892.1	11817.3	13049.9	8626.09	15633.7	15953.7	15077.1	15399.6	9987.69	9993.59	10244.6
M439T673			0.348412	1.63096	0.016202	438.916	673.029	1264.58	584.364	1243.9	1212.23	2389.8	2223.45	2709.61	1674.62	2275.55	2672.86	2514.39	2698.42	2647.49	2641.96	2940.99
M666T334			0.742037	1.63056	0.0773443	666.451	333.826	20490.4	3379.25	10544	6428.44	9898.45	11120.2	14224.5	22245.9	24071	14804	16875.4	8647.23	6206.91	6222.65	5219.14
M229T96			0.471094	1.63019	0.474097	229.054	95.667	1408.84	6206.13	4438.83	5313.58	6999.83	5950.92	6331.55	3097.35	6099.68	3470.83	28915	1509.75	4242.27	3585.97	4239.6
M535T317			0.41577	1.62921	0.00856616	535.086	317.303	2517.07	927.124	3506.24	1698.68	3255.38	3353.85	4146.91	3967.13	4980.64	3135.99	4278.84	4349.57	3242.19	3487.02	3244.29
M351T75			0.557572	1.62778	0.623747	351.182	75.0235	11480.4	9789.29	1132.1	16319.4	2232.29	3378.83	56090	2339.31	5264.15	2395.5	2659.3	3415.15	2122.16	2033.74	2176.94
M478T850			0.356206	1.62642	0.0657741	477.904	849.968	834.813	893.658	1438.02	1828.77	1176.66	1386.36	2374.55	2976.38	1646.37	2964.28	883.584	1447.8	2094.19	2152.59	2152.73
M803T307			1.35781	1.62627	0.361604	802.592	306.585	10910.9	27199.2	26534	25761.2	32448.2	72697.7	28064.5	139585	23840.4	18304.5	28529.8	79694.9	25152.5	45345.6	19988.3
M539T682			4.39645	1.625	0.0873585	538.968	681.591	30113	415851	452050	229924	148754	155344	419869	450668	186801	406611	411152	451963	819458	819534	647131
M602T396			0.530144	1.62441	0.0187747	601.513	396.462	4284.38	1193.21	3689.57	6945.3	4820.53	4515.24	4757.33	7221.44	8339.74	8152.16	7041.63	5826.15	3898.45	4690.63	4186.26
M581T544			0.47895	1.62365	0.102883	580.969	543.738	518.208	1007.86	1882.8	2098.39	4531	2905.19	4673.11	2126.49	3520.46	4351	2083.72	4260.92	2632.82	3073.44	2656.13
M285T78			0.791537	1.62337	0.00850768	285.206	78.362	5894.53	5683.44	4597.9	2568.42	4164.22	4787.99	9060.91	9420.15	6525.7	8347.57	4671.94	6935.52	4360.58	4090.3	3780.68
M384T290			0.509659	1.62337	0.0538173	384.011	290.404	2122.04	1907.06	2781.9	2054.54	4343.96	1574.04	6393.64	4782.34	2850.59	2804.46	4013.11	3155.04	6574.41	6591.83	5310.81
M248T409			0.337463	1.62305	0.38667	248.131	408.597	1869.33	2967.22	1405.25	916.888	560.9	1475.37	542.482	1405.11	1375.72	2051.24	2222.7	7326.64	952.264	1065.39	1038.95
M253T300			0.352313	1.62279	0.12825	252.942	300.36	187.926	669.676	2324.98	1986.35	2411.51	2491.57	1944.3	2454.11	2829.05	2530.53	4966.01	1620.74	2372.46	2686.21	2678.39
M135T698			0.299151	1.62255	0.073968	134.865	698.254	767.99	603.243	1230.33	677.908	2024.96	1434.48	2501.96	1142.18	2050.87	2268.86	2103.42	866.95	1883.6	1850.5	2041.26
M277T327			0.681405	1.621	0.154703	277.216	326.833	5300.25	6320.57	5049.32	2083.39	5363.58	8181.31	5042.39	6836.11	4633.47	8378.24	9397.55	18068.1	4134.81	4137.46	4254.45
M367T731			0.987562	1.62089	0.0112511	367.104	730.724	8873.02	8613.53	7000.8	4597.95	8036.27	6320.82	9545.96	8411.5	15307.2	10871.4	10247.4	16031.8	7082.1	7076.23	6792.2
M272T52			0.385709	1.61929	0.0908383	272.22	52.381	2937.69	2883.98	2480.55	3459.02	722.517	643.872	1668.63	2934.88	4795.25	4273.17	2710.42	4875.05	3685.81	3690.17	3813.18
M710T51			0.175519	1.61914	0.160206	709.523	50.8635	340.167	505.442	222.719	127.504	103.835	385.953	115.999	406.684	403.558	818.958	402.514	581.54	481.609	443.359	446.203
M728T544			0.269357	1.61909	0.0402466	727.966	543.738	91.8411	334.094	984.653	519.91	880.78	1145.76	1212.41	1082.13	879.701	1070.24	1133.99	1028.33	887.8	985.646	888.534
M1096T639			1.42131	1.6177	0.0650343	1096.03	638.74	10904.7	15294.6	20730.2	17458.9	13378.9	34491.3	28958.8	19711	37242.4	24095.3	23220.4	48373.1	10934.2	12199.4	10968.2
M371T871			0.344105	1.61769	0.053623	371.099	870.791	745.087	1928.19	1516.99	2069.42	1093.62	1320.75	1739.21	2046.69	2378.13	4050.17	1897.01	1920.78	1493.54	1495.57	1629.17
M531T75			0.363013	1.61752	0.117788	531.436	74.882	743.114	911.537	1923.59	992.246	1027.17	1169.63	1198.73	2709.57	327.095	2523.1	1920.55	2267.19	2315.09	2207.53	2335
M484T516			0.281024	1.61678	0.092773	483.913	515.917	841.177	453.235	1809.4	698.866	761.615	1118.99	2283.21	1224.52	882.106	1693.14	2158.16	947.488	2886.25	3081.54	2915.42
M186T662			0.248902	1.61658	0.219916	185.998	662.337	1300.14	447.334	689.886	1247.53	337.786	813.532	667.895	693.495	1229.05	1303.12	993.691	2930.88	444.024	412.269	413.601
M310T79			0.458452	1.61657	0.0854957	310.237	79.106	825.226	3626.71	2314.84	621.815	2610.39	3605.37	5155.84	4566	2746.37	4363.68	3228.84	1931.63	3675.2	3673.1	3135.05
M275T627			0.798498	1.61633	0.0283137	274.852	627.361	15836.9	5483.28	13704	4360.71	6246.78	5652.71	14757.6	12721.6	15517.5	12612	13878.7	13405.2	10961.7	9789.33	9781.94
M626T379			0.323439	1.61605	0.09978	626.327	379.414	2427.53	1324.06	2439.57	733.597	2252.28	2064.39	4223.38	4811.85	3669.19	1359.36	2164.78	1938.14	2353.93	2326.61	2530.37
M702T487			0.563336	1.61597	0.0223049	702.495	486.93	3327.25	5164.36	2796.6	1261.17	4222.58	5166.52	7265.22	6984.66	3976.34	5693.41	6904.73	4627.54	6234.84	6290.56	7217.48
M418T898			0.69497	1.61557	0.0189743	418.029	898.054	3313.32	4098.93	5229.09	1036.68	5207.3	5040.32	5189.37	6112.07	9004.27	5245.1	6290.84	6811.86	5245.69	5125.86	5242.36
M341T796			0.765327	1.61557	0.301336	341.003	795.694	11133.5	14623.8	9640.76	1561.14	11494.3	11759.1	5469.54	4506.46	31814.1	9384.53	33739.6	12363.2	5602.14	5834.16	5831.64
M510T515			0.187541	1.61488	0.0410769	510.336	514.615	425.079	442.365	383.604	259.452	644.335	270.771	329.781	892.261	457.144	829.84	671.071	736.974	385.695	382.979	402.224
M792T49			0.403408	1.61414	0.10239	791.614	48.652	1599.14	3340.23	1004.03	884.961	1719.76	2393.23	1581.75	2722.88	1672.68	3410.56	3496.92	4776.11	2625.03	2547.77	2550.57
M205T405			1.28525	1.61399	0.250229	205.063	404.871	12899.1	32373.3	23517.2	904.788	14459.4	17475.1	10685.7	52822.1	17927.7	39536.1	7657.11	35398.7	11039.5	10683.2	10681.9
M739T560			0.371499	1.61351	0.0458684	738.564	560.303	1613.25	684.117	2102.12	3415.26	1466.53	1221.3	2437.13	2709.04	2093.61	4024.25	2603.91	3078.04	3046.76	3091.8	3091.67
M258T226			0.375973	1.61346	0.526472	258.039	225.786	1810.41	4121.53	8262.23	3225.1	923.068	4087.94	2810.37	3890.36	1363.84	2489.57	22624.1	3012.09	1046.77	1509.94	1532.43
M804T731			0.301981	1.61301	0.123189	803.878	731.383	868.536	554.544	2055.7	2008.95	771.405	655.406	1819.32	2287.12	1300.19	3136.68	1022.61	1587.3	3285.29	3201	3286.03
M369T75			0.347142	1.61235	0.0315382	369.304	75.2215	945.088	320.528	1870.78	1221.75	589.286	1785.13	1829.46	1560.05	1584.31	1709.62	2198.58	1973.26	1722.27	1782.13	1800.9
M764T287			1.60694	1.61206	0.132277	763.593	287.267	15180.9	15113.6	54263.1	48598.3	36982.4	47985.8	52864.2	65738.8	73010.3	30879.8	26535.3	102600	52259.6	52429.3	48186.1
M452T713			0.454957	1.61145	0.0978386	452.331	713.118	2717.65	1001.69	3084.61	2147.44	1000.47	1602.99	4776.51	2239.58	1275.43	2962.09	2953.44	4412.99	2377.48	2782.02	2785.7
M557T480			0.16031	1.61097	0.293769	557.445	479.987	320.482	796.848	462.833	393.627	579.502	1181.14	305.989	1873.63	1975.6	1119.81	280.08	460.964	277.092	296.311	279.289
M297T956			0.209198	1.61057	0.077138	296.997	956.121	280.319	929.371	620.493	252.745	417	536.038	509.973	1083.56	1023.24	726.576	455.587	1090.7	385.663	390.76	384.782
M343T77_1			0.652203	1.61043	0.049737	343.133	76.701	3849.17	901.471	9120.51	4783.39	3287.05	4562.63	8542.87	6776.17	8028.49	6075.73	7862.87	5397.09	3801.28	4267.05	4283.89
M511T667			0.214618	1.61041	0.0446301	511.395	666.6	415.838	120.286	605.028	771.76	939.852	905.248	1369.22	710.695	762.275	1238.56	1008.32	962.857	1433.27	1373.55	1471.82
M736T256			0.447663	1.61039	0.105529	736.49	255.935	1866.99	2184.13	1402.21	809.835	1621.35	1690.29	1365.28	2531.18	1560.31	2797.73	2291.75	4872.98	2003.58	2482.33	2010.69
M806T338			0.482211	1.61016	0.186203	806.498	338.368	2578.9	1958.8	5917.12	3060.79	2164.91	2725.16	3358.14	1526.64	3703.28	8469.89	8510.25	4067.94	5138.41	5982.08	5170.22
M655T840			0.438017	1.61015	0.190631	655.117	840.047	1739.28	4161.8	2221.97	693.841	1520.54	1761.44	2045.08	5980.6	5002.97	2509.36	1491.7	2451.24	881.95	887.479	949.173
M949T623			0.315984	1.60924	0.0645669	948.665	623.183	1101.28	429.263	607.737	1971.92	2609.33	3171.01	2380.42	2184.04	3064.09	2363.26	3140.05	2784.36	2263.85	2225.82	2225.73
M132T1367			0.306573	1.60867	0.193427	132.101	1367.09	1221.09	1844.9	1749.98	1429.25	2095.68	2152.41	2002.81	6510.23	2609.26	2096.91	1862.39	1798.64	2111.02	2115.75	2179.8
M727T278			0.477293	1.60824	0.189181	727.441	277.57	1135.74	459.048	3332.33	2338.96	1999.79	4238.39	1751.88	5073.09	4058.59	1968.91	2330.85	6534.81	2568.66	2419.43	2571.62
M346T664			1.83204	1.60803	0.0872023	346.018	664.175	20021.1	59620.3	11985.7	36123.1	19341.2	10117.6	54797.9	28972.6	40914.8	40578.8	46422.9	41110.5	37179	37218.4	30870.2
M873T322			1.71369	1.60679	0.348504	872.563	322.43	15657.8	22781.2	16917.4	8912.76	15105.3	91895	31762.6	38770.4	22973.3	58004.3	23385.4	100298	22956.9	23089.5	22957.1
M654T71			0.442896	1.60494	0.0311679	654.454	70.8425	2293.24	1225.14	2377.23	1212.83	1345.02	2870.71	2735.73	1995.24	3771.22	2118.59	3680.17	3873.67	2521.98	2804.7	2543.73
M844T693			1.84941	1.60426	0.0936266	843.522	692.824	36356	35883.2	22638.8	35596.7	28927	42729.4	37624.1	44018.3	62734.1	73898.6	17377.8	88618.7	36858.4	34811.5	35620.5
M997T938			0.233886	1.60418	0.150662	997.006	937.854	437.058	1010.28	469.005	178.21	968.514	1134.07	685.985	555.058	1405.55	1147.16	910.004	2029.2	690.123	622.417	688.856
M608T368			0.592678	1.60405	0.135691	608.462	368.447	1783.58	473.831	4418.76	6235.57	6687.87	5150.72	2395.09	9307.28	6112.27	9691.45	4607.07	7587.51	4635.43	4935.97	4612.59
M297T76_1			1.47878	1.60393	0.481334	297.167	76.133	2288.98	123982	112527	478.951	1742.07	2414.83	56628.3	1402.05	84854.1	127268	119592	706.17	80260.4	75282.7	69791.5
M155T601			0.311028	1.60391	0.0177639	154.915	601.237	1016.18	679.445	1356.71	816.239	427.589	486.033	1425.93	1594.42	1246.93	1301.18	1174.83	926.912	943.65	914.732	1008.64
M325T722			0.3928	1.60386	0.0495192	325.125	722.287	2351.05	1011.82	1636.92	1024.92	890.1	1856.59	1783.99	2190.84	3121.26	3448.29	1488.67	2035.03	2237.81	2093.24	2231.75
M226T76			0.651906	1.60382	0.0137139	226.48	76.273	942.97	2119.78	3762.83	4267.4	5448.39	4313.24	5676.29	5736.68	5466.24	6403.35	4902.44	5261.98	3996.21	4260.56	4250.39
M871T48			0.315648	1.60358	0.0808858	870.748	47.615	3555.52	1190.5	802.972	1119.64	1510.22	2212.43	2600.79	1539.55	2429.38	2794.41	4070.48	3228.62	3853.75	3618.82	3618.08
M947T638			1.81734	1.60317	0.17161	947.032	638.107	21392	25637.9	32039.1	42433.3	26405.6	34798.3	25558.1	74669.4	29657.4	27885.9	38739.6	96399.5	45004.8	26595.1	45429.3
M168T91			0.374213	1.60287	0.108254	167.85	90.561	1833.96	1397.55	1380.83	417.186	2794.08	1308.65	3355.94	1017.85	3592.91	1661.93	2118	2891.19	2449.19	2473.47	2590.16
M507T70			0.48192	1.60214	0.0293602	507.247	69.602	1667.25	2509.91	1551.75	2051	919.358	2419.39	1939.75	3971.97	1993.14	3152.87	2823.42	3932.54	2019.08	1987.24	2019.07
M184T932			0.245789	1.60203	0.0766097	184.492	931.514	1349	703.55	669.761	198.491	1469.12	674.683	1432.28	1464.6	619.526	1180.86	1770.94	1645.44	1020.46	1030.71	992.091
M330T74			0.231311	1.60147	0.540019	330.206	73.658	8093.01	4496.23	3055.92	22623.1	7092.31	1561.23	32974.9	2899.81	34548.7	1003.66	1724.78	1992.22	1315.22	1415.99	1318.08
M286T73			0.114667	1.60125	0.531412	286.082	72.72	4349.71	2280.14	1146.7	1777.24	1346	988.495	1186.29	1965.68	11940.6	1121	781.492	2041.18	2012.67	2018.65	2040.3
M874T48_1			0.386349	1.60051	0.266457	873.695	47.814	995.136	4250.21	476.616	906.598	1203.62	1438.03	1719.29	1899.15	797.986	3576.83	2276.8	4567.05	2028.23	1975.56	1977.05
M672T56			0.296135	1.60009	0.0310235	672.137	56.127	488.479	619.268	1245.83	674.824	554.606	874.277	734.603	1716.05	1126.2	1063.04	1092.75	1399.41	581.904	613.432	600.089
M204T1043			0.85832	1.5997	0.304191	204.123	1043.21	4862.09	21261.7	5463.48	2643.51	12825.4	4977.29	23749.4	13094.5	7017.99	26168.1	11028.5	2179.27	3867.72	4371	4025.51
M279T734_2			0.459068	1.59955	0.0420447	279.079	733.949	1807.46	3766.98	2382.96	2870.37	625.424	4463.57	4005.4	5704.98	4968.17	4119.91	3093.1	3568.13	2424.31	1849.7	2471.61
M323T240			0.494136	1.59947	0.320073	323.087	239.669	3466.7	6998.71	9743.84	2148.52	4002.11	8684.96	10357.9	8210.93	23326.8	2049	8881.07	3227.44	2168.15	2611.57	2154.05
M258T593			0.405731	1.59945	0.11812	258.109	593.482	2703.43	3147.98	1626.81	531.074	2292.23	2290.57	5992.13	2005.66	1836.46	2788.17	3375.46	4142.57	2007.33	2195.34	2608.18
M689T362			0.723273	1.59888	0.0573656	688.544	362.479	3389.69	4026.72	9054.37	13822.2	12045.8	10584.6	10102.5	21102.5	17295.5	10958	11929.3	13230.2	7803.57	6269.24	7839.51
M1126T640_1			0.921361	1.59857	0.0404674	1125.55	640.061	2434.5	6672.51	8429.98	9633.61	7175.98	8389.65	6931.61	9315.15	8163.18	15146.8	14644.4	14115.6	8516.2	7486.63	8553.75
M233T903			0.165031	1.59716	0.0572748	233.059	903.246	523.463	977.93	574.861	570.29	448.202	477.602	476.445	1010.27	1498.15	845.467	1154.89	720.391	476.664	562.297	495.762
M416T398			0.222805	1.59666	0.478854	416.336	397.525	3354.65	1189.13	6748.65	2348.62	9228.21	6661.69	3017.25	913.061	25200.2	897.219	6523.75	10599.3	2926.15	3608.41	3593.66
M282T78			0.358838	1.59546	0.276835	282.211	78.362	966.91	4333.51	895.735	2832	560.623	734.996	2846.44	4687.92	4018.15	3043.52	665.324	1209.79	1706.28	2035.93	3009.85
M713T551			0.401334	1.59426	0.0326132	713.472	550.66	1178.28	578.445	1027.85	1722.17	1421.94	2299.91	1998.91	2743.31	1699.01	2602.04	1458.24	2616.98	3172.12	3402.75	3267.23
M216T415			0.358599	1.59332	0.415322	216.122	415.214	5967.72	2533.89	1923.06	17028.1	5380.35	592.295	15030.7	1317.6	4256.23	16205.5	15440.1	1007.06	15826.1	15974.1	15974
M736T83			0.541464	1.59306	0.109286	736.49	82.732	4902.69	3567.93	1313.35	2122.98	1327.37	3789.01	1579.77	3667.17	4179.99	4919.69	6218.05	6554.45	3718.52	3279.5	3718.32
M397T79			0.464037	1.59223	0.0900718	397.182	79.318	2447.38	1503.7	4240.47	746.254	2091.28	2968.06	4075.05	2356.36	4232.6	1784.92	4719.16	5118.57	3411.04	3309.99	3410.92
M398T867			0.112813	1.59198	0.43348	398.141	866.889	492.264	2230.69	1172.45	652.175	589.467	662.663	815.678	704.103	4693.95	702.177	717.996	1599.11	595.473	573.629	574.415
M755T81			1.52309	1.5913	0.134694	754.536	81.375	42332.9	40654.1	26723.3	82215.6	40774.3	32278.2	39690.2	122986	88764.3	44601.3	40709.2	84909	30536.4	30911.1	30885.5
M214T1330			0.802987	1.59064	0.0801319	214.135	1329.56	7732.64	3813.77	4081.63	6411.25	7217.36	8234.37	7758.07	6513.14	14574	10966.2	4861.25	14962.1	6869.76	6896.71	6959.55
M258T506			0.339677	1.58974	0.361628	258.055	506.48	3192.9	2419.53	1423.32	1759.76	1356.49	1156.83	581.777	5244.09	7423.77	2312.18	910.8	1505.51	1107.94	1344.31	1156.96
M816T777			0.476207	1.58969	0.221954	816.276	776.821	1743.12	2279.62	3659.96	4362.85	2262.86	3209.34	4342.17	9435.44	1913.26	3458.3	1574.99	7123.63	4198.91	4325.99	4620.53
M462T551			0.304088	1.58962	0.217714	462.075	551.455	2781.61	1408.46	1625.95	1147.11	1484.83	1086.32	4283.05	3943.28	1085.62	488.575	1693.82	3661.51	3666.33	3605.51	3605.84
M713T492			0.459447	1.58891	0.0411145	713.472	492.338	1112.36	1239.79	2012.41	2125.93	1720.24	2880.78	2251.01	3136.68	1545.76	4272.53	3207.27	3210.19	3907.45	3556.85	3904.59
M235T75			0.366982	1.588	0.0665093	235.168	74.968	1583.49	1465.11	2104.28	877.664	1657.82	1902.09	3144.43	3910.35	3168.13	1487.64	2206.09	1312.97	1327.57	1495.71	1353.85
M725T280			0.331658	1.5875	0.115497	725.427	280.273	1774.02	104.916	1937.09	1141.53	1095.02	1984.27	1889.63	2732.06	2201.26	3433.13	1270.09	1232.3	1312.28	1314.05	1212.26
M449T585			0.411374	1.58739	0.13818	448.845	584.708	1474.48	2041.08	2479.4	2060.91	3234.31	1294.73	3023.62	1272.71	4811.29	5971.67	2372.94	2524.92	2205.91	2583.98	2232.65
M325T76			0.599066	1.58648	0.33959	325.247	75.637	41475.9	980.345	870.538	23065.7	31350.8	16538.5	1069.41	8036.07	54956.6	31632.3	50427.5	35184.4	7583.31	7493.05	7808.24
M795T259			0.969319	1.58624	0.156364	794.546	258.923	3172.69	6963.98	8797.32	12673	5603.24	11048.9	3859.03	13132.4	7638.08	16931	12287.9	22702.5	15294.1	15284.7	14242.9
M797T677_1			0.599882	1.58616	0.0129959	796.958	677.376	2351.37	4289.49	7805.59	8735.41	6822.65	8552.22	8990.23	9560.5	11221	9467.8	13094.9	8822.64	12867.8	13238.1	13248.7
M665T326			0.91881	1.58567	0.0934184	665.448	326.427	16007.5	7155.41	6668.25	4435.44	7369.57	9520.07	15864.7	11805	8685.73	22679.2	8890.36	13191.8	16727.2	15251.4	15296.8
M778T81			0.503174	1.5853	0.0322217	778.053	81.363	1449.7	3037.67	2221.17	3511.82	4620.71	2342.49	3245.32	3892.18	5045.37	5423.7	3379.46	6255.03	2856.46	2852.97	2765.06
M657T634			3.39599	1.58497	0.00523327	656.996	633.635	75535.6	89505.2	106698	113180	62622.1	109651	112462	178405	173651	121495	122555	174566	167557	131339	135576
M221T77			1.15063	1.58465	0.00617633	221.153	76.972	8584.82	8250.44	14432.9	7098.87	13035.8	12675	14886	16035.4	22089.7	18149.8	12728.8	17650.8	19354.5	19788	19761.4
M332T70			0.381694	1.58417	0.250349	332.152	70.141	4681.79	1690.14	1604.23	4250.43	2536.94	2334.16	9186.97	7400.76	2272.97	1757.12	2466.1	4001.72	1862.92	1869.32	1737.53
M891T83			0.492208	1.58318	0.057319	890.588	82.8365	700.771	2913.48	2725.55	2966.37	1315.26	3551.09	1737.03	4686.82	4521.63	3136.08	4119.7	4236.36	2887.38	2814.91	2891.05
M441T208			0.306659	1.58309	0.117782	441.332	208.456	1900.73	1598.78	558.031	1001.17	2184.56	2578	3016.02	2581.77	4370.43	1756.77	1034.25	2788.73	1690.78	1691.88	1777.74
M365T36			0.115774	1.5826	0.545088	365.031	35.568	2722.9	2869.92	922.363	1434.07	602.183	428.986	1355.98	1451.29	8924.78	465.838	622.462	1392.03	163.249	150.816	162.19
M922T392			0.245908	1.5825	0.0508768	922.132	391.529	571.073	716.373	471.677	880.885	735.086	1387.62	1358.32	1712.58	1370.26	1254.67	1323.04	518.156	1218.67	1381.67	1382.7
M423T737			0.636102	1.58214	0.0922508	422.884	736.909	2228.6	2960.81	4763.6	3401.4	7585.11	7656.43	9730.85	5010.27	3664.58	10903.2	7307.08	8626.8	10982.8	10990.3	11382.8
M738T595			0.524076	1.58187	0.120272	737.561	594.848	2056.84	1507.11	1509.55	4941	2311.86	5189.91	3858.62	6213.36	1894.72	6200.27	3634.16	5907.34	5871.93	5694.09	5871.65
M1132T694			0.745929	1.58174	0.134793	1131.53	694.124	2238.84	5776.02	7789.01	6298.82	14711.6	11630.2	5502.66	13208.9	18477.7	19458.2	8411.22	11568.1	9462.42	9484.29	10529.6
M249T1332			0.567113	1.58158	0.0267378	249.099	1332.38	3423.86	3242.82	2921.01	3508.74	2103.49	2575.8	7123.69	4883.66	5733.84	3730.35	3194.33	3447.87	4308.37	4371.68	4308.99
M1125T643			2.94732	1.58143	0.354162	1125.05	642.858	25259.1	62497	86176.4	91881.2	58541	180726	49423.2	269027	60759.3	87033.8	49816	282690	58926.2	58070.6	58069.2
M337T675			0.400928	1.58125	0.206224	337.076	675.08	1320.02	1300.14	1761.74	1039.5	2358	7029.42	3387.81	3143.19	3290.33	3269.84	6378.47	3946.87	8779.31	6494.37	6456.03
M186T1206			6.16684	1.57958	0.217558	186.103	1205.9	657564	760517	390699	114425	177860	172762	659559	962194	750516	242272	761817	215344	563031	577821	685218
M851T50			0.533433	1.57925	0.320257	850.543	50.155	3725.58	2798.05	2027.69	7066.13	11832.7	2102.34	12390.2	9508.2	3105.25	3210.12	3005.18	15451.8	11190.2	11193.3	11379.2
M411T734			0.310554	1.57803	0.128629	410.904	733.66	828.572	564.947	614.46	2276.69	1230.08	983.932	1613.82	2104.73	829.471	2532.7	1026.27	2148.12	3186.65	2484.27	3174.79
M155T693			0.520668	1.57797	0.00881905	154.947	693.447	1616.99	1004	3030.13	2936.77	2346.19	2582.7	3074.98	2898.49	3856.99	4443.15	3264.52	3790.9	3103	3207.28	3442.19
M493T62			0.883683	1.57784	0.183117	493.26	61.9915	14353	11809.3	12935.7	7046.96	3683	6380.33	4631.89	14701.7	27258.8	15150.1	19688.2	7257.09	7956.82	7635.43	7636.96
M580T681			0.951706	1.57759	0.020187	579.97	680.875	17311.3	19884.5	23608	19999	13144.4	17866.3	40392.1	22901.4	37387.2	21676	34031.9	20007.5	35364.9	35363.8	35995.7
M142T666			0.24678	1.57511	0.101765	142.085	666.029	1462.61	543.93	2408.02	2181.3	2702.32	1805.19	4723.24	3032.12	2045.11	1573.77	3946.89	2167.86	4491.18	3953.75	4492.9
M703T312			0.561355	1.57467	0.153474	702.502	312.206	5167.83	3429.91	5026.45	2861.68	6553.17	6828.87	5442.9	4637.69	12548.1	6136.47	4355	13911.9	3975.08	3972.76	4061.84
M210T439			0.2673	1.57461	0.0476322	210.038	439.301	541.015	729.73	532.382	718.894	1000.39	1127.2	1212.71	805.364	1990.88	914.062	1116.55	1281.76	634.469	634.723	681.751
M163T543			0.457304	1.57447	0.279795	163.024	542.742	1047.66	3230.83	1004.19	5420.26	3269.87	1438.67	2206.78	1801.07	7577.19	6179.9	1223.34	5276.67	5885.34	5964.9	6069.12
M739T413			0.764347	1.57404	0.143921	738.564	413.133	9166.13	2574.72	8149.06	8986.84	10055.4	8802.75	11738.5	13235.3	8447.39	25061.4	9348.26	7305.87	13071.5	13069.4	12660.4
M331T364			0.206582	1.57388	0.147141	330.917	363.593	421.498	470.013	745.481	630.583	656.705	640.251	1918.92	599.898	760.729	1092.85	596.855	640.889	1485.73	1310.66	1310.49
M333T894			0.492683	1.57268	0.0143057	332.884	893.582	2123.12	2706.04	2509.78	1298.91	2109.49	3733.88	3962.87	4251.04	2343.97	4651.63	3457.21	4107.64	3980.28	4078.14	4078.02
M244T58			0.405368	1.57214	0.127526	244.064	58.293	2208.86	1907.99	1213.35	1328.64	1751.44	984.781	1462.3	1325.06	1411.21	2775.65	3807.83	3988.26	1873.96	1698.41	1941.54
M800T307			1.53165	1.5721	0.644278	799.565	306.838	5583.68	14310	6383.81	7620.24	8620.59	85933.2	7448.15	10512.8	9342.7	21498.6	8850.58	144286	7267.82	7623.09	7290.33
M422T830			0.389857	1.5717	0.037167	421.969	830.271	1398.15	2089.66	1282.59	867.68	753.332	1509.85	1647.53	1638.33	3091.25	2280.83	1519.35	2241.1	1289.47	1310.48	1289.57
M225T787			0.361958	1.57117	0.167224	225.033	786.908	1198.77	1323.96	2213.37	1756.54	618.83	1872.23	1113.95	3678.72	2411.05	2883.76	518.508	3508.97	1955.28	1960.08	2011.3
M314T66			0.364621	1.57112	0.237386	314.029	65.6145	1736.61	3975.4	1187.48	1420.21	1576.71	2581.52	3166.86	1012.84	3706.29	2560.94	7040.6	2116.81	1861.97	1864.86	1996.07
M404T844			0.270417	1.57071	0.140922	404.057	843.965	720.431	1279.79	768.509	479.865	779.103	1077.33	1081.68	1026.62	2496.06	737.021	838.501	1838.64	629.844	752.001	756.525
M723T77			1.40702	1.57003	0.657954	722.508	77.077	25363.7	106700	10253.5	6160.53	7291.04	13708.3	8588.21	11858.8	15050.1	20125.7	8941.61	201520	8981.77	7986.69	7987.45
M354T436			0.42248	1.5698	0.638976	354.176	435.852	20523.4	3985.92	882.934	1351.55	1736.45	1322.06	1310.26	1040.46	2039.61	952.455	10028.2	31412.6	4124.76	2730.39	4084.78
M269T56			0.842709	1.56954	0.070713	269.212	55.886	6137.94	8226	7535.33	2021.02	5138.92	8576.9	9135.28	6076.32	6007.72	14740.7	10093.5	13017.9	13784.3	13514.1	13784.7
M236T52			0.16357	1.56936	0.321898	236.199	52.349	322.235	805.894	3187.83	872.025	1018.45	437.446	3013.71	977.367	681.151	883.106	2885.81	1985.53	1736.11	1245.86	1209.73
M651T345			0.7668	1.56899	0.215852	651.432	344.908	4336.7	4505.05	5592.22	738.232	7914.58	14964.5	5004.95	9674.26	6784.26	13214.1	7549.66	17475	6824.43	6846.54	7589.88
M907T388			0.245619	1.5689	0.178952	906.513	388.172	1819.93	900.388	138.34	540.302	2641.83	1327.35	2626.27	2373.43	944.485	1669.92	2733.83	1211.92	1178.88	1079.29	1080.8
M137T512			0.314543	1.56835	0.0774468	136.862	511.685	1308.5	543.221	1186.24	513.549	1365.73	527.061	1514.45	1944.91	822.068	2000.07	1003.26	1253.8	1435.69	1299.92	1442.94
M135T300			2.42761	1.56787	0.214021	134.894	299.967	26077.3	55036.5	53249.2	81019.1	51830.8	66526.9	77697.1	72171.6	50775.5	59905.1	64072.2	198638	53305.4	52986.2	44412.1
M469T596			0.258212	1.56784	0.0986824	469.237	596.476	428.381	602.881	700.954	696.302	403.081	1306.27	643.291	1236.08	853.558	1696.28	714.179	1344.12	538.702	582.689	537.567
M311T77			0.411874	1.56753	0.262782	311.257	76.786	1631.94	1473.44	2799.5	4922.94	1610.84	2164.61	3075.33	8872.82	2612.48	3482.81	1951	2896.63	3001.55	3007.01	3007.01
M945T654			0.992042	1.56659	0.105915	944.51	654.497	6420.39	9846.47	11017	14532.7	11587.9	6796.05	27065.5	7907.61	13805.3	14037.2	10111.1	21382.6	8315.47	9644.03	9661.8
M872T613			0.203363	1.56657	0.0927131	871.657	613.162	682.158	596.014	826.462	957.217	968.355	1990.21	2344.6	1652.45	1744.5	1332.18	1693.2	664.495	2528.06	2527.35	2331.52
M486T54			0.895762	1.56591	0.134951	486.292	53.837	11149.1	10176.7	9189.83	6290.8	11968.4	14126.4	14468.6	7374.48	21632.3	30324.6	8834.51	15863.3	10348.8	9794.25	9800.6
M587T732			0.833616	1.56572	0.00237029	586.89	732.416	4491.52	6420.4	10373.3	9691.97	8077.31	9389.4	14375.4	13495.5	12255.1	12065	9873.19	13785.5	15153.1	15155.7	15881.2
M147T621			0.286947	1.56487	0.102362	146.965	620.508	1201.4	302.008	1128.34	1079	1283.47	1211.77	2879.78	836.389	1250.12	1751.11	1735.26	1258.92	2644.46	2636.73	2636.71
M551T720			0.522082	1.56406	0.0349351	551.451	720.442	2818.73	2136.82	3583.93	3499.11	1846.15	3393.05	4316.32	4106.77	2513.7	5473.43	3864.29	6748.9	5130.9	5314.19	5313.79
M226T1008			1.3659	1.5633	0.269081	226.083	1008.25	13200.2	18355.6	40561	24060.5	15813.4	35449.2	24562	23854.5	44151.1	88699.2	13821.2	35404.3	25276.8	20686.5	20927.3
M765T185			1.71639	1.56192	0.296059	764.521	184.704	5245.02	2273.58	36897.1	76768.1	22419.2	43741.4	23066	55456.6	12453	48904.8	86273.3	66464.1	22468.2	23537.5	22457.3
M401T805			0.455082	1.56127	0.171835	401.023	805.481	1604.15	5073.15	2326.42	654.276	2174.95	2649.67	1852.95	2492.23	5940.46	2739.57	5599.91	3986.22	2284.1	2696.59	2319.8
M489T49_1			0.886719	1.56125	0.42692	489.226	49.462	37567.8	17504.4	44520	17813.6	12075.4	10675.7	16028.2	108703	21990.4	13559.1	24665.3	33873.6	5013.93	4914.72	4915.6
M258T40			0.256919	1.56121	0.0530255	257.98	39.815	1155.37	981.936	913.359	379.446	993.589	917.821	1257.26	2346.07	1438.32	1003.44	1105.65	1188.52	528.648	496.756	496.641
M305T289			0.531151	1.56035	0.177234	305.035	288.607	2351.66	1469.17	1819.86	3246.4	7103.4	3051.74	5355.97	7380.41	3502.6	1924.13	4121.89	7427.51	5311.41	6515.62	6516.08
M596T327			1.02343	1.55888	0.381529	596.333	326.514	3569.17	1520.36	125202	54434.3	70404.8	71356.2	202626	82087.7	111071	49780.4	50764.9	12625	42697.2	42845.1	42844.6
M157T1264			0.7273	1.55883	0.0785745	157.123	1263.6	10432.5	4731.74	5137.02	2892.71	3696.21	5447.73	6692.09	11078.5	6887.87	11132	9923.47	4695.44	4662.47	4721.06	4720.71
M997T675			0.507184	1.55794	0.0277832	996.906	675.326	885.99	2431.64	2732.18	2881.11	3170.13	4054.54	4853.18	4157.67	3087.48	5192.13	2940.68	4938.3	4650.25	3996.61	4646.12
M130T891			0.484861	1.55777	0.273694	130.049	891.205	13660.5	7675.21	6375.55	5421.3	6347.39	8013.91	7762.54	24043	5853.83	7409.47	23361.7	5553.84	6487.77	6640	6638.4
M688T79			0.363225	1.55727	0.13689	688.384	79.0905	1473.76	1151.56	833.449	337.544	1267.38	2199.06	1051.91	2040.39	1800.7	2710.62	890.793	2815.69	1982.9	1815.42	1909.41
M188T91			0.612103	1.55721	0.234373	188.127	91.3195	3049.65	2593.82	3055.95	2151.52	2503.39	9908.1	4337.37	6690.39	2055.37	8580.58	4592.67	9968.03	3646.9	4095.09	3784.62
M227T62			0.486733	1.55704	0.132665	227.128	62.223	959.537	3553.07	2402.09	2020.51	3027.26	3891.64	2270.93	3010.28	6980.64	5471.47	2261.76	4690.48	2621.01	2620.73	2685.19
M253T420			0.320311	1.55684	0.145341	252.94	420.337	851.798	328.022	2193.22	1367.62	898.901	2929.9	2994.02	2178.07	1071.43	2113.4	3148.34	1835.99	2929.28	2945.48	2710.09
M689T310			0.735153	1.5568	0.115575	688.518	309.897	6254.26	6743.1	3874.54	3664.08	3573.99	10422.3	6493.36	10567.6	5769.74	15498.2	6414.57	9016.32	3724.4	5736.93	5721.89
M383T393			0.385325	1.55672	0.0353214	382.99	393.24	1191.47	1081.47	1974.05	1293.49	1153.98	1223.62	2367.21	2187.66	1056.06	1486.3	2353.39	2875.58	1350.54	1284.43	1282.74
M241T765			0.26903	1.55649	0.0320039	240.871	764.803	456.586	557.534	553.407	875.177	856.562	671.353	1584.71	1076.82	633.263	1017.06	828.7	1039.69	1591.45	1221.06	1235.82
M313T443			0.351628	1.5564	0.134467	313.051	442.775	3087.04	1022.22	3744.93	3005.3	1663.47	3437.78	7077.11	2174.13	3533.19	2340.19	3886.13	5830.59	3686.42	3701.13	3378.27
M323T525_2			0.216834	1.55443	0.320485	323.124	524.881	1825.96	1412.2	638.221	529.566	2526.99	692.525	2795.88	3568.3	3450.46	614.136	785.107	639.338	2174.92	2194.66	2198.72
M585T76			0.978927	1.5537	0.136683	585.373	76.349	15555	14065	29538.9	6460.76	19425	17319	19489	35729.6	21104.8	12358.8	24615.4	45744.6	23684.5	25384.6	25373.8
M464T733			0.286566	1.55361	0.133827	463.885	733.231	471.536	310.804	1612.63	2015.03	1443.7	752.752	2067.06	1725.29	994.909	2607.9	1092.53	1776.12	2935.91	2936.52	3033.49
M199T72			0.562083	1.55316	0.306513	199.088	72.444	8122.94	1860.2	6845.34	1956.73	1379.46	2398.2	7211.36	5177.5	1765.85	7145.49	2070.95	11672.6	3451.32	3624.65	2997.87
M597T367			0.223165	1.55285	0.137726	597.374	366.858	743.377	835.456	1102.21	1158.47	1462.74	653.31	1346.34	3083.73	1515.68	1165.09	1039.65	1097.57	994.344	1012.59	1320.53
M292T321			0.98142	1.55284	0.0853654	292.034	320.875	1564.52	16137.7	14999.6	2895.11	10710	9350.3	16128.3	12497	18409.1	15268.6	11872.3	12251.5	8018.71	8196.9	9654.01
M768T638			1.35341	1.55189	0.159688	768.02	637.522	9037.18	21362.5	20890.3	22108.6	16801.6	22490.8	22813.6	22359.5	41757.9	24879.5	9321.5	53752.2	19157	17228.6	16200
M241T644			0.356458	1.55187	0.088439	241.154	643.514	661.583	897.192	1388.97	2223.8	1871.48	1832.15	1878.56	2182.95	1769.37	2043.48	1858.1	4040.68	2091.59	2092.94	2249.57
M238T423			0.209636	1.5499	0.20191	237.93	423.2	274.065	13.6114	1172.33	122.903	731.112	1136.73	1198.15	493.256	758.186	871.666	1035.8	991.265	1072.84	1059.75	1184.02
M225T50			0.375252	1.54951	0.0653121	225.024	50.015	1661.17	1309.29	1540.23	1504.08	1740.42	2034.21	2274.25	2005.36	1435.13	3495.46	4086.22	1872.31	4822.02	5146.79	5467.29
M704T311			0.553654	1.5494	0.15221	703.507	311.341	6824.26	6077.88	8517.78	2555.34	3180.44	1852.02	2501.21	11676.2	8702.73	7789.94	5138.64	9135.81	5273.9	5266.35	3533.18
M686T675			0.436464	1.54938	0.0754393	685.934	674.505	380.787	1420.81	3088.25	2473.63	3041.69	3621.32	4853.91	2774.39	2934.12	4491.15	2456.61	4222.16	4620.68	4279.62	4577.45
M514T446			0.586422	1.5491	0.129584	514.323	446.46	7889.49	2825.69	2063.69	2712.05	2045.47	3276.04	3611.82	6988.75	3804.31	4749.37	7961.35	5125.01	4748.06	4925.87	4925.15
M278T74_1			2.44927	1.54909	0.0633269	278.22	74.221	48414.3	63956.3	71525.5	20538	48550.3	59189	66555.7	103968	60747.4	123372	48075	80865.7	70441.2	76527.2	76464.7
M220T77			0.632308	1.54874	0.00510658	220.146	77.0385	3324.44	2852.56	3375.73	2345.03	3684.57	3554.35	5344.38	5253.93	4543.9	4364.27	3456.98	6674.32	5157.52	5392.24	5410
M1195T47			0.209544	1.54815	0.385364	1194.82	46.71	4735.4	3309.15	1611.6	4783.34	4626.89	2026.89	2500.95	6992.63	14948.4	3272.16	1697.82	3243.64	4910.19	4909.41	5024.16
M329T70_21			0.220101	1.5477	0.47266	329.341	70.1545	1866.93	1259.08	2133.88	1099.89	2485.1	5171.95	1530.63	1420.89	9308.8	1166.6	7944.95	321.977	4751.6	6971.83	5946.21
M891T720			1.67889	1.54745	0.0815567	890.941	720.38	15656	57684.3	28569.8	27164.2	65025.4	18774	58542.2	63189.7	29539.7	58853.4	53422	65865.4	73082.8	76571.3	73027.5
M313T73			0.518914	1.54729	0.119269	313.178	73.0425	7062.53	5005.31	3515.59	1530.08	4609.89	3219.66	6084.91	5592.49	11267.6	7048.17	3234.54	5366.39	2674.33	2674.14	2573.23
M509T480			0.537632	1.54713	0.206538	509.159	480.28	8345.73	7130.7	4759.99	4262.52	9514.38	7153.13	13601.2	2388.23	4012.13	12527.7	19937.3	11223.4	8288.65	8288.64	8283.94
M485T54			1.43122	1.54711	0.138221	485.288	53.564	36192.8	23762.6	27744.1	18719.7	38022.2	39683.6	41633.3	23884.5	65766.5	86647.1	28957.2	37973.3	24668.3	24914.1	24830.4
M120T186			3.25032	1.54681	0.110748	119.976	186.012	71053.9	108819	162258	47883.8	180630	302632	165555	242416	224091	210027	337013	171689	225474	252247	355698
M108T1334			0.341802	1.54622	0.0876275	108.08	1334.12	1452.47	1592.28	1385.63	1146.66	1347.31	1350.74	1898.72	1104.01	1435.56	3819.93	1983.96	2552.94	1275.98	1270.6	1378.21
M357T672			0.294154	1.54595	0.0128964	356.912	671.943	885.857	571.345	1100.53	805.607	1460.61	1060.84	1617.5	1345.34	1181.97	1662.28	1271.73	2018.76	1878.85	1879.41	1953.16
M213T71			0.436459	1.54562	0.168238	213.054	70.873	2534.48	1906.16	2522.82	2047.53	915.73	1199.92	1263.33	2053.33	3126.84	3718.78	1675.65	5359.57	2691.33	2413.33	2292.17
M455T892			0.20293	1.54495	0.439455	455.089	892.434	1890.17	5231.24	1030.62	843.444	6430.75	1495.88	1981.36	1243.11	2270.75	5002.93	12101	3544.72	2027.15	2063.4	2062.91
M173T694			0.593112	1.54431	0.050109	172.958	694.356	2401.15	2482.73	3039.78	5603.61	5670.1	3319.07	7584.78	3693.31	6567.05	6991.08	6190.67	3745.49	6965.82	6869.29	6987.74
M451T334			0.107368	1.54331	0.423597	451.359	334.026	3094.79	582.129	5022.34	1279.56	4129.51	7263.66	4495.44	4076.5	15534.8	1309.69	5157.51	2409.69	2241.15	2240.96	2512.05
M329T300			2.21561	1.54304	0.150839	329.233	300.291	44191.7	54765.3	43625.3	18266.6	48992.7	58884.8	28428	62330.7	32990.9	112018	71583	107304	55814	56625.1	58340.9
M855T74_1			0.486657	1.543	0.0163063	854.51	74.09	1367.29	4101.16	2421.7	2123.82	1922.26	2605.45	3789.81	4130.28	2785.98	4408.18	3201.39	4122.13	3445.67	3568.79	3441.96
M1072T543			0.283483	1.54265	0.0965484	1071.88	542.505	206.455	601.628	671.814	1233.53	450.357	1150.55	887.837	1115.08	942.435	1207.38	788.115	1714.66	1393.86	1534.98	1532.03
M347T891			0.488935	1.54223	0.0143373	347.121	891.027	3962.01	2348.38	2232.02	2076.64	2029.42	3335.08	3358.33	3585.75	4188.49	4706.25	3263.76	5547.76	3133.25	3132.4	3083.63
M324T67			0.433824	1.54222	0.105623	324.181	67.3055	2109.3	2985.62	2615.56	1669.06	903.696	4200.5	3541.52	4159.22	1167.65	3711.68	4471.7	5285.39	2113.82	2537.01	2526.29
M801T49			0.545023	1.54211	0.21152	800.601	49.291	6281.04	7580.81	1575.41	1019.16	2143.29	3338.21	3226.51	3940.55	3870.57	7550.78	5772.09	9470.13	4118.33	4118.31	3879.52
M817T803			0.219616	1.54191	0.0267299	817.482	802.51	373.858	507.265	587.356	257.442	634.546	275.149	734.819	855.372	775.736	416.382	704.344	577.241	369.935	680.518	665.003
M286T182			0.904886	1.54169	0.120147	286.092	182.204	10758.9	12909.7	9763.03	4200.1	12440.7	5857.77	22484.1	9465.2	21989.8	7981.84	13433.4	10872.8	5573.37	5789.65	5589.75
M889T420			0.203882	1.54119	0.204858	888.984	420.077	333.15	41.4672	1202.3	478.528	1322.09	1335.61	2023.06	992.546	961.095	1321.97	1454.13	511.055	1285.04	1290.95	1386.86
M646T79			0.398626	1.54118	0.0471291	646.366	78.8305	1365.19	1267.88	1353	1264.29	1508.23	1211.56	1400.01	1976.6	1549.38	2859.05	1366.21	3132.2	1239.33	1295.49	1300.53
M444T52			0.416042	1.5411	0.126428	444.383	52.338	1379.43	6073.32	5804.86	2714.7	2721.81	1346.42	6053.54	6009.32	7534.77	4011.53	3675.93	3599.49	3607.79	3362.11	3376.68
M449T50			0.767624	1.54106	0.223195	449.279	50.057	14203.8	6922.45	6821.76	4154.02	3924.48	4949.38	5349.97	9796.05	7486.62	15321.8	5482.39	19709.6	4428.18	4414.91	4819
M97T1297			1.50277	1.54105	0.0740399	96.9599	1296.53	21489.2	23673.4	20485.7	26983.9	22489.2	22136.5	25386.7	36412.1	25742.9	64532.1	26431.1	33015.7	29391.6	28068.4	28102
M414T343			0.243469	1.54074	0.427559	414.357	342.599	438.284	62.7568	1260.68	670.214	1567.15	3486.22	351.549	1362.47	2228.25	279.043	2994.68	4316.94	494.655	374.823	361.094
M295T71			0.897479	1.5402	0.111547	295.263	71.279	7620.88	7261.12	7654.91	5767.07	5107.57	10001.1	4985.93	12148.8	10568.7	14880.5	5791.31	18488.9	9633.28	9635.75	9973.05
M289T276			0.461765	1.53986	0.00903339	288.995	275.968	1620.35	2331.85	1595.08	1518.75	2097.54	3171.67	3712.59	3372.4	2514.65	3711.72	3199.88	2483.34	4009.21	4168.09	4166.34
M218T88			0.433961	1.53956	0.388052	218.211	87.5135	2679.06	7004.58	7407.54	35260.1	9034.24	9102.92	8449.21	18092.9	42843.7	13266.7	14844.8	11023.9	4994.4	6747.11	6742.13
M274T77			2.52474	1.53884	0.17395	274.273	76.788	40495.2	59063.2	197143	313846	115162	102606	224800	98061.2	301122	201092	180032	269538	61677.8	59347.2	61675.9
M509T635			2.7428	1.53872	0.0166771	509.02	634.952	31057.2	52478.7	44153	92175.5	80294.3	90558.5	94884.1	109879	94700.9	114917	75338.7	111484	95942.2	91470.1	95991.3
M249T839			0.787014	1.53848	0.124461	249.095	838.573	4842.07	6081.15	10094.8	3586.79	6776.14	12504.1	6881.13	9136.21	8958.24	12657.1	9895.46	19988	6210.92	5685.77	6196.34
M454T329			0.436	1.53816	0.187154	454.388	329.045	4041.92	3695.3	9134.32	6874.61	13260.8	9088.35	9703.19	9529.56	24230.1	7272.95	9700.52	10465.5	6882.57	6883.66	6776.42
M151T55			0.302258	1.53712	0.379121	150.921	55.4445	397.92	1540.81	1288.37	371.146	1263.54	664.638	939.336	602.082	1262.38	1425.89	481.391	3783.7	550.745	552.959	560.07
M456T328			0.523689	1.53647	0.135725	456.402	328.471	1383.78	347.177	7005.59	4987.59	5812.76	8276.23	5796.29	5819.74	10824.1	7091.89	5294.6	7907.46	6016.15	6483.08	6273.39
M934T360			0.325984	1.5362	0.28815	933.532	360.258	2218.73	640.902	709.924	479.29	725.894	2308.31	988.228	2115.57	555.678	3466.69	1208.56	2546.24	962.744	939.997	962.123
M471T265			0.31441	1.53619	0.234562	471.103	265.43	690.545	1060.37	1345.38	1010.35	1125.12	1272.54	1430.24	905.292	846.355	1012.42	2094.06	3703.51	797.801	818.506	802.612
M302T483			0.444574	1.53607	0.518654	302.145	483.383	15638.5	8100.2	4689.8	7936.72	12864.4	1604.73	31681.1	3036.83	2382.52	2842.3	35076.5	3065.62	27030.1	26287.8	27033.5
M293T77_2			3.91218	1.5352	0.00858824	293.175	77.105	91036.1	107074	161697	110691	153837	152161	149962	187842	243173	200536	157790	252769	248831	255965	255634
M328T70			0.30804	1.5349	0.551956	328.157	69.793	118.261	8463.5	113.314	138.211	128.191	4543.32	6624.97	3748.43	121.845	2390.1	7795.97	47.21	1736.89	191.985	520.992
M773T655			0.873453	1.53478	0.101968	772.988	655.324	562.433	8363.92	8042.73	7471.04	8456.87	6443.47	7584.41	9532.71	6052.57	14619.5	8007.95	14581.9	8501.26	7950.44	7962.56
M676T47_2			0.149611	1.53437	0.14156	676.353	46.661	1176.36	1109.47	604.821	598.971	840.277	510.113	1157.86	1349.72	2061.78	452.134	1686.84	718.026	1029.29	1031.25	952.226
M297T831			0.281781	1.53436	0.268785	296.867	831.139	1134.39	474.266	684.057	1240.65	1926.17	3094.02	3481.93	547.635	2093.25	3892.89	1498.06	1610.5	2620.65	2598.64	2282.94
M842T48			0.302332	1.53391	0.180934	841.693	48.006	913.546	1355.03	975.564	566.25	678.39	1166.45	1160.67	1095.19	585.32	2023.71	1027.53	2782.21	1392.36	1398.13	1292.72
M248T892			0.406488	1.53378	0.0879372	248.031	891.789	2459.77	3335.34	1527.7	633.47	1396.09	2284.2	1677.22	3202.05	3536.28	3354.98	1970.87	4106.53	1483.09	1482.39	1418.55
M305T78_1			0.424606	1.53342	0.577646	305.175	78.057	747.596	2440.31	5160.27	14384.8	2577.3	2730.81	2794.75	5247.89	26187.2	2194.77	2877.04	3697.08	2291.71	2589.55	2375.22
M279T362			2.049	1.53329	0.628315	279.038	362.084	33309.2	355456	16507.8	13340	21881.5	17922	287758	17170.4	52165.2	12098.1	319692	13999.8	34503.1	90800.9	35543.2
M418T59			0.409793	1.53211	0.195109	418.221	59.462	2979.96	1539.41	6511	2796.05	2692.8	3378	2428.29	10002.6	3430.89	5196.12	4858.58	4568.34	2525.93	2336.86	2531.96
M785T306_1			4.07637	1.53196	0.107475	784.581	305.533	353891	316255	227511	167835	222286	367005	301200	282357	553935	298513	356695	742362	330106	331907	330106
M796T71			0.589332	1.53123	0.0327057	795.519	70.971	3546.48	5783.1	1195.6	8279.39	8352.9	6382.52	9175.1	8718.51	8820.73	9464.5	8268.86	6909.9	9237.75	9258.41	9196.41
M612T628			0.245231	1.53047	0.0519666	611.714	627.867	912.057	761.952	1170.16	1140.5	345.939	1027.97	2151.42	1026.28	1009.71	1501.86	1187.4	1324.44	1057.34	1059.07	1021.31
M175T668			0.382168	1.53027	0.243054	175.118	667.673	4402	1113.53	3666.07	1913.33	5405.34	6973.16	12829	3318.8	4886.28	3972.56	5898.6	5015.41	7599.42	7421.4	7598.68
M259T775_1			0.231576	1.52991	0.177511	258.693	775.127	1891.81	832.53	1041.93	2212.16	3415.33	1442.6	1355.85	4011.73	3758.65	936.686	2886.32	3629.48	2018.01	2458.38	2445.09
M430T64			0.296485	1.52965	0.0210451	430.351	63.936	727.715	802.901	855.54	1148.9	458.896	835.009	730.976	1578.38	1169.8	1055.53	1441.92	1410.02	979.769	1021.8	1021.79
M252T75_3			0.844159	1.52934	0.0243771	252.411	74.928	5382.54	6382.45	10034.5	4452.22	9227.2	6343.67	10242.2	9511.52	12776.4	14792.7	8577.84	8060.51	8078.97	8271.77	8079.41
M679T318			0.6482	1.52925	0.0885477	678.504	318.471	10190	9867.43	6462.21	6409.04	5603.23	3873.18	11853.5	8113.62	17304	8239.86	5964.39	13372.6	5873.34	5878.52	5489.5
M298T71			0.295254	1.52914	0.0805388	298.281	71.3255	823.14	699.591	1725.38	591.488	967.472	1230.36	1146.43	679.455	1786.68	1718.79	2118.97	1781.78	1515.12	1596.64	1591.72
M674T304			0.45527	1.52861	0.0913016	673.527	304.106	643.378	622.624	3374.66	2549.02	1994.47	3418.2	2510.31	4440.1	2601.16	3331.97	2784.57	3595.93	2548.16	2794.77	2551.36
M680T667			1.22373	1.52823	0.0343775	679.511	666.592	22198.9	8214.76	24904	33363.4	28194.4	31811.3	47930.9	26750.7	25964.1	40786.8	45752.4	40042.4	64097.1	64098.5	65327.5
M254T53			0.288166	1.52787	0.281849	254.21	53.064	5821.2	4504.43	932.495	4387.46	5479.48	2209.31	3277.52	3603.33	13658.1	6526.96	5122.65	3463.44	4257.41	4273.31	4941.57
M382T70			0.444456	1.52742	0.350103	382.223	70.072	1894.77	11166.6	2302.27	1031.55	4089.08	2233.61	9305.04	3159.4	9297.58	3364.59	2075.21	7497.84	3981.51	4681.04	4606.51
M415T675			0.707197	1.52735	0.008592	414.955	674.544	3290.11	5752.6	7221.95	7967.75	8025.2	10468.5	10347.8	12831.4	9869.27	11862.4	11489.6	8857.59	10556.1	10070.1	10531.1
M278T482			0.617905	1.52487	0.223156	278.087	481.927	1164.02	1535.28	5397.4	5739.42	10606.9	11779.5	13403.2	5111.56	13720.9	5034.49	6992.18	10972.2	4974.43	5466.95	5447.34
M236T77			1.43619	1.52482	0.0097833	236.105	76.972	12357.7	15103.8	25049.4	12461.3	23052.9	19793.9	26066.1	22812	33515	29428.2	21425	31158	33095.1	33145.2	34152.7
M325T668			0.459598	1.52441	0.0462582	325.172	667.888	4891.88	1119.62	4733.55	5368.67	5473.84	4923.45	9379.96	5389.23	4695.65	6324.77	8703.25	5920.69	10913.8	9281.39	9274.9
M725T517			0.318727	1.52396	0.0271506	724.566	517.397	961.649	1665.78	1895	921.739	1957.49	1008.01	1845.86	2734.94	2277.44	1634.72	1659.75	2663.33	1950.22	1760.5	1766.96
M561T73			0.817256	1.52394	0.083987	561.485	72.815	6188.32	6516.31	12666.4	2698.5	3142	6718.62	5454	11813.9	8941.98	11043.4	9973.36	10576.8	9048.75	9060.38	9272.48
M317T820			0.438345	1.5235	0.0394045	317.098	820.078	1571.2	2798.05	1936.14	656.373	1509.85	2463.2	2853.01	2412.73	3937.54	2416.66	2183.61	2855.6	1511.37	1562	1513.31
M452T333			0.31075	1.52337	0.251374	452.371	333.05	6961.07	1550.58	10506	2224.31	8708.96	6639.69	7744.32	5451.05	19524	4673.13	9112.22	9236.11	6044.97	6266.28	6265.9
M850T675			0.393149	1.52295	0.0401874	849.94	675.082	569.213	2157.07	3257.94	1442.04	2654.71	3636.16	3060.18	4170.31	2933.74	3255.64	3805.43	3665.2	4220.53	4222.72	4575.7
M638T348			1.05979	1.52216	0.232226	638.42	347.537	12499.9	7544.16	3426.53	9079.14	23732.3	18545	13315.1	20402.3	12084.6	22424.5	9016.58	36655.5	12566.8	11677	11686.5
M441T780			0.338587	1.5221	0.274694	441.196	780.251	2359.94	1690.45	3081.91	3061.41	4500.26	4552	8384.21	9497.98	5032.94	2351.53	1927.13	2100.46	1593.97	1550.09	1984.59
M246T739			0.322855	1.52196	0.0857228	246.109	738.972	1474.29	1421.5	1675.84	2065.68	1454.69	2417.14	2476.44	3163.87	1927.95	1257.35	2696.06	4472.86	2661.88	2341.84	2339.28
M913T84_1			0.387986	1.5218	0.192272	912.505	84.24	553.991	378.408	2964.38	3046.93	999.074	3929.97	1065.06	3768.75	3392.81	3230.21	3588.41	3022.7	2773.93	2690.32	2805.87
M317T829			0.339369	1.52176	0.130172	316.908	828.905	635.022	2248.7	1317.64	416.433	774.364	1021.17	1558.85	2443.68	1706.47	1502.72	866.335	1681.52	776.566	776.17	882.337
M702T934			0.77372	1.52169	0.146087	702.494	933.914	5440.43	9117.26	5686.3	7154.2	6543.8	4445.78	5921.86	8472.98	6630.37	15734	5480.61	16174.4	5355.95	4948.29	5356.47
M749T695			0.723007	1.52143	0.279994	748.987	694.773	3090.57	10734.5	7722.34	2917.53	9838.36	9289.19	6023.58	8760.91	7696.54	8695.12	9256.33	25890.5	10961.7	13080.9	10825.8
M326T894			0.237775	1.52136	0.0220462	326.022	893.554	723.308	962.251	886.946	705.655	898.726	965.392	976.452	1108.68	979.783	1830.52	1757.34	1170.46	1340.56	1340.48	1324.44
M315T751			0.357046	1.5211	0.294092	314.902	750.862	815.551	1000.02	2018.92	1156.94	1433.08	3341.76	1530.22	3427.18	1887.78	5296.5	811.921	1901.87	4271.71	3836.81	4351.78
M442T55			0.345779	1.52077	0.382393	442.33	55.37	2307.38	3982.97	881.659	4252.5	2275.39	1001.15	7664.98	4244.55	629.729	979.903	1732.89	7104.87	1533.06	1449.17	1704.62
M229T1194			0.341075	1.52026	0.0299575	228.932	1194.49	870.338	673.546	1646.79	1194.49	1533.86	1376.37	1282.76	2414.73	2114.22	1255.11	2143.58	1880.5	2035.33	2105.47	2631.07
M503T81			0.491407	1.5202	0.0514351	503.126	81.263	484.133	3473.57	2837.18	1930.27	2405.1	1454.8	2196.83	3583.7	2899.48	3833.23	3141.8	3476.79	2006.27	2261.31	1989.38
M781T80_1			3.48266	1.51994	0.0309372	780.552	80.067	156819	154406	182872	110458	179007	170391	150367	294507	294439	209718	166846	334075	122077	122074	123247
M265T39			3.56044	1.51982	0.436631	265.147	38.662	434532	275688	175922	144734	160879	180587	320236	1.03261e+06	237977	157526	133914	203448	268715	268798	274454
M186T364			0.610043	1.51942	0.626219	186.077	364.2	1608.69	7538.13	38926.5	3096.11	1170.43	32280.3	1167.05	574.395	1378.75	59039.3	64853	1561.03	71501.2	71578.2	75679.3
M342T366			0.224191	1.51928	0.335061	342.263	365.834	6290.25	1434.2	2400.2	896.513	2294.63	982.91	2219.86	2842.57	7238.57	1158.75	3081.12	5182.87	4702.11	3404.91	4716.87
M269T48			0.395787	1.51923	0.25611	269.225	48.2485	10787.5	2103.86	1719.58	5237	3346.77	3897.27	11331.3	3475.75	10780.1	4143.69	4821.46	6606.64	1867.82	1858.49	1867.81
M363T70_2			0.865749	1.51894	0.148058	363.24	69.586	9759.76	13287.1	4961.08	2156.67	3300.08	15371.8	12455.5	7829.37	9076.85	15249.9	11986.1	17582.1	7952.15	7951.07	8128.92
M630T335			0.362583	1.51872	0.351506	630.385	335.096	2069.45	1176.16	2454.87	1098.71	5955.79	595.014	1546.04	6748.25	2823.54	1341.72	5151.82	2663.56	2149.97	2018.56	2375.81
M599T731			0.332247	1.5187	0.0358441	598.871	730.605	858.585	795.188	1787.2	1706.99	1635.65	1087.87	1983.4	1817.26	1473.59	2726.85	1468.8	2484.51	2737.22	2574.76	2738.31
M420T834			0.220328	1.51866	0.183821	420.055	834.458	764.102	1793.38	871.142	574.604	702.104	1206.5	844.51	2117.82	2628.47	1089.05	742.598	1555.6	547.453	557.299	547.684
M244T121			0.209183	1.51842	0.186426	244.262	121.414	591.23	906.401	2076.7	1013.75	845.967	1751.77	1769.85	1121.48	3465.35	1279.25	1137.37	2137.8	697.996	681.915	697.957
M290T908			0.356138	1.51839	0.123732	290.063	908.178	1259.67	1559.22	1102.38	1992.37	1010.41	2589.96	807.683	3222.36	2593.71	2802.08	1536.59	3483.61	1316.42	1190.28	1310.77
M820T59			0.599468	1.51722	0.314596	819.513	58.91	9562.14	10654.5	5071.41	4742.22	3894.13	3889.24	4441.72	16574.7	7867.32	4486.03	4149.98	19852	3896.22	3921.34	2392.74
M277T852			0.250173	1.51682	0.0414188	276.897	852.194	649.26	564.921	728.517	595.549	834.748	683.504	1025.85	861.298	1017.63	1706.8	748.787	792.602	864.807	1036.39	1115.98
M384T795			0.466784	1.51671	0.0138344	384.065	794.669	3260.46	3176.46	1580.79	4103.43	3829.05	3713.29	5504.14	5891.23	3195.96	4945.47	5945.69	4341.33	7371.07	7985.38	7365.97
M1103T663			0.407529	1.51648	0.125585	1102.95	663.325	2153.11	3025.49	580.157	933.681	2455.07	2797.69	2600.81	2526.57	2670.51	5302.07	2570.03	2444.69	2371.47	2522.85	2527.71
M837T806			0.297389	1.51629	0.0245742	837.058	806.2	656.039	1153.69	623.863	327.445	815.008	770.23	976.637	1361.5	1049.57	1239.33	758.214	1204.95	820.71	829.661	820.766
M551T718			1.02772	1.51613	0.132297	550.949	718.092	9366.62	10097.2	6377.91	11559.9	25358.1	25885.8	28718.5	13551.1	12558.1	28723.6	23331.3	27515.8	28048.1	28752.4	28898.2
M344T120			0.58382	1.51538	0.236654	344.228	119.61	23136.7	15899.1	15725.2	20807.4	32567.4	11676.7	23799	27281.9	65856.6	11763.2	21801.1	31059.3	16719.1	16223.6	15591.6
M430T817			0.192943	1.51448	0.0876747	430.071	817.268	380.274	536.317	559.131	141.854	661.527	399.952	821.22	346.102	964.672	500.04	832.418	592.911	355.786	355.797	374.111
M425T59			0.475763	1.51427	0.209742	425.134	59.476	4220.23	6432.41	12605.4	2655.18	4165.28	4605.81	6963.16	15346.8	4728.21	5004.92	11465.1	9013.15	4681.65	4801.29	4677.41
M490T859			0.292084	1.51409	0.128852	490.024	859.031	757.335	1321.12	1353.28	783.424	1361.57	907.358	651.984	2498.63	2540.25	1695.23	1386.5	1044.91	895.317	869.967	895.228
M324T210			0.830727	1.51393	0.211686	324.129	209.502	7122.87	6907.03	1983.83	5724.82	14371.5	9362.75	10318.4	17640.8	5994.87	7670.31	7366.74	19851.7	4865.08	5340.22	5333.43
M760T253			0.40431	1.5138	0.138543	760.494	252.699	2123.65	1156.84	2343.48	819.527	979.427	2468.46	1390.19	1963.56	1479.36	3691.36	2715.25	3733.82	2257.65	2112.98	2260.34
M266T892			0.495905	1.51368	0.0710195	266.042	891.706	3564.01	4549.16	2392.7	1033.01	2364.07	3172.01	2902.11	4804.07	5130.98	4669.5	2526.42	5812.98	2400.87	2584.46	2584.46
M158T696			0.316297	1.5136	0.0289402	157.87	695.959	1201.76	638.299	700.678	1225.67	1012.3	446.135	1286.02	1414.1	1500.76	837.91	1207.02	1662.48	1200.83	1204.95	834.66
M527T903			0.608335	1.51359	0.164538	527.157	902.671	3477.04	4720.21	4646.76	12352.3	4367.2	11652.3	17426.2	9645.14	10560.8	8437.48	4852.39	11462	4771.47	4855.23	4855.4
M731T345			1.11513	1.5135	0.136492	730.592	345.473	15613.9	18946.7	16383	12579.5	16207.8	14820.9	26696.6	40880.1	13567.8	34528.7	15183.1	12248.4	35970.3	34998.6	35011.4
M157T669			0.269683	1.51299	0.0734977	157.083	669.027	1118.06	401.09	1472.56	988.342	1854.17	1634.06	2753.88	1020.64	1994.35	1931.92	1515.36	2083.23	1377.49	1221.33	1231.65
M1002T716			0.710578	1.51287	0.0385131	1002.47	716.397	7336.55	4124.66	7501.15	7418.28	4456.31	8268.51	14022.9	8134.1	7744.89	12908.1	6785.28	9566.39	7631.51	7549.41	7549.77
M285T500			0.391391	1.5127	0.329811	285.056	499.81	1948.89	3493.43	1012.91	1906.66	2296.34	499.956	1542.5	508.47	1908.24	2510.25	4404.86	6004.72	3793.69	3385.15	3387.18
M106T1321			0.603034	1.51233	0.206065	106.041	1320.77	5027.29	5707.71	10186.7	3408.71	2204.15	5252.84	6844.01	15922.8	8220.37	5131.75	7204.1	4750.1	5627.23	5621.1	5997.15
M303T482			0.176352	1.51213	0.510172	303.148	481.697	2465.83	1256.79	744.589	848.168	1913.11	714.642	4566.69	496.795	407.133	675.397	5392.38	472.68	4190.65	4031.41	4033.52
M332T479			0.209157	1.51185	0.452309	332.218	478.569	325.989	2106.49	2128.15	497.999	976.852	796.208	1027.13	438.7	4069.55	729.367	3566.86	496.86	621.636	658.563	658.151
M282T481			0.321496	1.51155	0.289737	282.048	481.451	5417.09	3966.7	3447.24	3199.6	5973.28	2095.1	11927	3300.1	2936.37	2002.34	10779	5482.12	8663.77	8663.94	7998.1
M169T762			0.311787	1.51148	0.0738178	168.945	761.69	1342.81	1661.63	1430.57	1235.23	1586.17	1227.64	1201.34	2222.12	3279.66	2247.52	1072.48	2800.32	1611.47	1858.73	1788.92
M970T777			0.53216	1.51136	0.189263	970.276	776.849	1883.42	3625.86	4192.83	2946.59	4303.59	2783.22	3023.64	7145.1	3786.98	8929.66	1425.1	5516.93	3725.87	3754.84	3749.05
M821T637			3.43019	1.51124	0.0470097	821.002	637.173	97329	126902	92559.8	172231	112361	66165.2	178452	210144	173575	200439	71205.1	175011	172678	155014	157002
M367T547			1.59947	1.51022	0.407426	367.104	547.381	10192.2	8235.97	10523.8	75752.5	21362.4	26813.7	41261.8	29812.3	27864.1	34149.5	9861.2	87933.7	12680	13288.4	13282.7
M765T77			1.40514	1.51008	0.0740357	764.522	77.19	31082.4	17717.8	23400.1	30331.9	21392.1	21464.7	26267.9	25506.3	36896	49903.1	23580.4	57395.9	32397	32376.4	33916.6
M386T79_2			0.882522	1.50981	0.0245351	386.271	79.212	5056.21	10973.7	8544.32	3029.13	5966.59	6825.89	9642.79	11712.9	12530.7	9186.02	9015.91	8901.74	4815.51	4842.37	4842.47
M156T852			0.276932	1.50978	0.0852202	155.978	851.966	602.641	954.04	668.095	1542.25	868.11	700.016	1424.15	1584.59	2115.11	1106.87	955.721	868.487	1340.6	1335.02	1234.6
M417T371			0.148654	1.50887	0.303566	417.154	370.905	537.745	291.681	2665.82	823.134	663.593	1362.28	854.997	2704.32	1027.07	1336.56	2650.8	998.919	449.926		490.017
M833T941			0.112118	1.50863	0.190558	833.382	941.126	583.51	480.036	264.925	89.2131	333.272	286.565	484.3	111.355	649.094	358.626	722.567	747.928	242.253	222.034	221.663
M242T479			0.412126	1.5078	0.260371	242.1	478.761	2372.65	2193.52	1605.02	1359.81	1352.41	1337.13	861.718	3087.85	1600.31	2515.37	1655.9	5689.41	1184.16	1384.16	1303.44
M657T307_2			0.650578	1.50766	0.138512	657.496	306.891	1159.27	2247.17	11333.3	8982.7	6193.22	8813.71	7809.27	11847.3	14309.4	8742.61	9496.25	6185.88	6086.73	6669.63	6095.62
M817T84			0.618849	1.50724	0.0734226	816.552	84.24	2570.9	1861.35	4273.52	6205.41	2275.71	5866.36	3195.31	6432.39	5492.19	6570.8	5605.94	7450.18	5580.84	5443.44	5577.06
M256T422			0.51465	1.50703	0.128881	255.935	421.839	1555.21	1070.29	4539.47	3368.5	7469.5	6498.28	8248.11	5597.21	5554.9	6011.47	7764.18	3748.29	7942.55	8047.58	4384.43
M533T56_1			0.0637101	1.50686	0.595448	533.383	55.5245	8044.06	3856.84	3217.83	7113.99	2896.48	1680.65	2776.4	477.849	2814.94	3803.61	26564.8	3961.02	2437.12	2420.33	1541.36
M499T79_2			0.403242	1.50631	0.0562142	499.36	78.6545	1400.23	1253.75	2164.94	1494.17	2108.99	1078.25	1506.49	2062.8	2766.45	1816.96	2442.33	3715.4	1666.29	1677.69	1757.14
M446T81			0.414425	1.50609	0.124876	446.254	80.596	1141.38	1811.73	1121.27	2838.3	4009.22	3744.13	4457.92	2717.27	5470.24	4434.87	2231.46	2776.53	4223.73	4129.03	4220.68
M626T717			0.276384	1.50604	0.130168	626.073	716.515	783.56	550.516	949.63	627.659	1806.19	648.342	1992.61	1184.7	1444.81	1486.54	522.291	1450.31	1864.39	1870.15	1967.76
M159T184			0.956488	1.50574	0.312486	159.029	183.677	5739.73	23048.5	7405.91	3417.36	5692.34	9742.81	7380.36	8473.19	7103.3	21198.8	12780.4	25949.7	11024.6	11023.9	10915.2
M705T348			4.00549	1.50568	0.241743	704.577	347.796	312546	236983	136376	104229	128750	123305	338623	432791	122136	418162	107363	150130	501790	428114	428250
M771T224			0.528032	1.50555	0.36485	770.568	224.043	1072.22	669.275	4622.04	11677.1	3430	4174.27	2281.72	13699.3	7283.71	4738.29	4878.52	5728.15	4977.71	5133.44	5971.07
M494T635			1.15193	1.50539	0.0387118	493.992	635.093	17619.4	11950.7	12195.4	15619.1	17617.2	16729.4	21094.5	30451	34055.8	19899	17279.8	15310.8	15931.1	14548.5	15885.8
M427T75			0.499888	1.50516	0.0938031	427.317	75.399	1846.64	2378.22	2830.91	1952.49	3589.95	1827.84	1985.03	2784.6	4337.77	4817.07	2312.89	5476.16	4283.91	4283.71	4117.13
M227T714			1.43101	1.50491	0.088703	226.987	713.526	36107.8	47589.8	59067.4	23962	31643.3	39983.3	93630.2	65774.9	42014.4	27147.2	62468.5	67665.2	83796.2	79533.9	103519
M370T305			0.124938	1.50484	0.353761	370.367	304.708	2676.09	3886.17	3164.42	2859	3941.24	1169.71	2504.67	2535.77	11320.6	2411.71	5635.7	2222.12	1753.34	1743.99	2005.71
M606T80			0.348026	1.50461	0.0204963	606.28	79.653	770.664	1109.82	946.704	992.78	1281.51	1943.37	1621.72	1735.03	2107.34	1725.34	1263.05	2147.24	1436.23	1355.08	1354.37
M784T49			0.364275	1.50457	0.0406361	783.612	48.689	1590.34	2937.45	1321.57	1397.14	1808.67	1415.05	2523.01	2807	1400.41	2513.32	3213.16	3296.23	1903.62	1751.59	1753.93
M759T85_2			0.227742	1.50411	0.306177	759.183	84.853	943.855	3055.54	622.611	4157.99	4258.62	1174.09	779.766	3886.76	5026.94	5650.29	5027.35	1006.31	4616.52	4420.85	4420.91
M738T667			0.364983	1.50401	0.0784985	737.563	667.354	1914.34	303.315	2294.09	2736.36	2795.07	2440.96	3745.26	2054.92	1944.61	3350.41	3458.24	4222.82	4034.37	4464.2	4452.29
M449T732			0.334512	1.504	0.0800515	449.064	732.191	793.926	1198.54	2056.09	1357.64	1968.14	1952.3	2207.28	3329.47	2076.77	3383.63	1434.6	1595.56	1985.96	2054.78	2053
M687T450			0.166007	1.50354	0.387666	687.397	450.158	557.005	857.975	707.695	122.314	208.734	360.36	113.427	1733.55	434.738	702.011	357.902	889.453	103.554	103.398	107.559
M168T229			0.359396	1.50335	0.293853	168.102	229.185	528.666	1846.72	2129.83	816.128	429.926	1483.57	944.001	1637.16	619.577	2805.77	1321.38	3548.66	754.146	732.3	867.582
M759T870			0.391095	1.50323	0.220879	759.219	870.224	2386.32	2974.78	2352.35	3257.45	1353.57	1586.13	2232.95	6575.9	1819.31	5623.22	2450.67	2208.85	1718.71	2053.33	2106.26
M322T706			0.385372	1.50314	0.358977	322.113	705.804	5739.54	998.199	1120.51	495.589	1511.83	858.291	1668.19	1730.54	4390.27	1633.64	3114.78	3582.15	1346.04	1385.46	1345.4
M176T552			0.59623	1.50236	0.261153	176.138	551.991	1131.57	1247.66	2960.55	9956.51	6306.46	5525.29	5822.95	10318.8	2529.07	7664.2	4204.92	10216.1	7753.8	7742.47	8549.23
M432T64			0.184331	1.50213	0.290624	432.313	63.7935	3216.09	3367.24	1207.27	2995.32	487.322	957.951	1096.97	3735.57	5506.44	703.691	3253.8	4076.44	1852.63	1303.48	1135.3
M497T807			0.214551	1.50158	0.172543	496.989	806.899	631.563	998.338	1043.46	539.378	363.595	896.313	956.924	823.031	2107.37	630.089	1442.7	755.913	789.665	810.303	811.06
M915T638			0.338655	1.50082	0.186999	914.57	638.28	677.871	2360.52	1242.92	1498.17	579.73	2244.45	787.677	3630.61	1626.34	1730.63	2614.05	2523.19		390.37	393.958
M416T59			0.991819	1.50062	0.0709607	416.351	59.476	14557.6	17431.7	6448.59	6545.92	11647.1	9466.97	15510.3	14042.1	12057.4	18987.3	13063.4	25527	11277.5	11277.4	11200.3
M906T345			0.683903	1.50048	0.265934	905.708	345.349	6812.35	8644.13	9054.24	10441.2	7678.78	7326.97	20587.2	21819.6	4872.68	17083.1	9250.56	1347.52	42506.3	41440	41433.5
M287T179			0.729021	1.50038	0.20164	287.221	179.459	9373.83	3623.94	6124.66	3808.19	8641.78	2929.38	4902.3	8786.57	7839.86	5685.83	7517.29	17034	2509.46	1038.68	2470.24
M436T74			0.407497	1.50033	0.521831	436.307	73.934	4438.74	5024.52	1921.66	2339.95	2911.23	1203.07	1235.76	2715.59	4334.49	2231.75	1253.14	14994	2146.09	2298.41	2297
M655T78			0.358387	1.50029	0.160544	655.376	78.0985	2445.88	526.653	1373.14	1668.22	1229.68	1359.28	1600.71	1608.33	2723.61	2321.72	956.835	3695.54	2124	1987.01	1970.18
M330T516			0.246371	1.50027	0.113048	330.122	516.445	597.826	1672.22	965.814	778.834	666.811	826.477	826.29	1708.91	1345.86	995.074	1158.88	2228.44	786.364	763.124	764.072

## Sheet: up-metabolite with description
name	adduct	description	VIP	Fold change	p-value	m/z	rt(s)	ctl-1	ctl-2	ctl-3	ctl-4	ctl-5	ctl-6	LDHA-cko-1	LDHA-cko-2	LDHA-cko-3	LDHA-cko-4	LDHA-cko-5	LDHA-cko-6	QC-1	QC-2	QC-3	KEGG.ID	HMDB	CellularLocations	SuperClass	Class	SubClass	DirectParent
M279T74_2	(M-H)-	Linoleic acid	16.627	1.70623	0.0168465	279.233	73.543	1.84141e+06	2.37851e+06	2.22125e+06	639035	1.81741e+06	1.73676e+06	2.47544e+06	3.48852e+06	2.44462e+06	4.29232e+06	1.93886e+06	3.50494e+06	2.59875e+06	2.60178e+06	2.66485e+06	C01595	HMDB0000673	Cytoplasm;Extracellular;Membrane (predicted from logP)	Lipids and lipid-like molecules	Fatty Acyls	Lineolic acids and derivatives	Lineolic acids and derivatives
M279T74_2	(M-H)-	Linoleic acid	16.627	1.70623	0.0168465	279.233	73.543	1.84141e+06	2.37851e+06	2.22125e+06	639035	1.81741e+06	1.73676e+06	2.47544e+06	3.48852e+06	2.44462e+06	4.29232e+06	1.93886e+06	3.50494e+06	2.59875e+06	2.60178e+06	2.66485e+06	C01595	HMDB0000673	Cytoplasm;Extracellular;Membrane (predicted from logP)	Lipids and lipid-like molecules	Fatty Acyls	Lineolic acids and derivatives	Lineolic acids and derivatives
M759T98	(M+Na)+	Thioetheramide-PC	13.2989	2.27745	0.0532672	758.567	98.436	838988	693614	892996	883840	1.15318e+06	1.12149e+06	1.24844e+06	1.82188e+06	2.34111e+06	2.54839e+06	446724	4.31101e+06	1.33412e+06	1.33421e+06	1.31367e+06
M811T259	(M+Na)+	1-Stearoyl-2-oleoyl-sn-glycerol 3-phosphocholine (SOPC)	7.06788	1.98258	0.0569266	810.597	259.33	118954	160522	335832	418821	442791	478517	616823	523970	404175	1.25271e+06	334876	744254	607773	537530	527052	C00157	HMDB0000564/HMDB0007878/HMDB0007879/HMDB0007880/HMDB0007882/HMDB0007884/HMDB0007886/HMDB0007887/HMDB0007897/HMDB0007898/HMDB0007911/HMDB0007912/HMDB0007913/HMDB0007914/HMDB0007936/HMDB0007937/HMDB0007938/HMDB0007939/HMDB0007940/HMDB0007958/HMDB0007959/HMDB0007960/HMDB0007961/HMDB0007964/HMDB0007966/HMDB0007967/HMDB0007981/HMDB0007982/HMDB0007983/HMDB0007984/HMDB0007985/HMDB0008002/HMDB0008003/HMD…	Cytoplasm;Extracellular;Membrane	Lipids and lipid-like molecules	Glycerophospholipids	Glycerophosphocholines	Phosphatidylcholines//1-acyl,2-(1Z-alkenyl)-glycerophosphocholines
M277T74_2	(M-H)-	all cis-(6,9,12)-Linolenic acid	5.37196	1.60971	0.054808	277.216	74.101	222701	296756	305368	85050.7	225587	248796	291102	478122	293686	584598	214287	366457	331200	339866	339366	C06426	HMDB0003073	Cytoplasm;Extracellular;Membrane (predicted from logP)
M277T74_2	(M-H)-	all cis-(6,9,12)-Linolenic acid	5.37196	1.60971	0.054808	277.216	74.101	222701	296756	305368	85050.7	225587	248796	291102	478122	293686	584598	214287	366457	331200	339866	339366	C06426	HMDB0003073	Cytoplasm;Extracellular;Membrane (predicted from logP)
M227T76	(M-H)-	Myristic acid	4.64757	1.51809	0.00564343	227.201	76.2525	116787	126782	258859	173185	265503	218312	320786	265689	322889	270666	271653	308430	245169	264434	264158	C06424	HMDB0000806	Cytoplasm;Extracellular;Membrane (predicted from logP)	Lipids and lipid-like molecules	Fatty Acyls	Fatty acids and conjugates	Long-chain fatty acids
M227T76	(M-H)-	Myristic acid	4.64757	1.51809	0.00564343	227.201	76.2525	116787	126782	258859	173185	265503	218312	320786	265689	322889	270666	271653	308430	245169	264434	264158	C06424	HMDB0000806	Cytoplasm;Extracellular;Membrane (predicted from logP)	Lipids and lipid-like molecules	Fatty Acyls	Fatty acids and conjugates	Long-chain fatty acids
M279T75	(M+H)+	alpha-Linolenic acid	4.29497	1.51201	0.0764766	279.231	74.864	231036	182590	264486	56754.6	235419	518999	369021	401908	335794	391581	319299	434204	279433	281167	279433	C06427	HMDB0001388	Cytoplasm;Extracellular;Membrane (predicted from logP)	Lipids and lipid-like molecules	Fatty Acyls	Lineolic acids and derivatives	Lineolic acids and derivatives
M482T382	(M+H)+	1-Stearoyl-2-hydroxy-sn-glycero-3-phosphoethanolamine	4.18303	1.90528	0.265924	482.324	381.784	362156	178125	63752	60530	63297.5	51333.8	538980	461061	119872	258387	55756.3	50524.2	354314	360344	360345
M341T676	(M-H)-	Sucrose	3.33567	2.43927	0.100816	341.108	676.018	77077.3	19476.3	39221.4	98795.6	67217.2	20727.3	261103	93468	46880.4	31458.8	105490	248301	44862.2	45952.9	45951.9	C00089	HMDB0000258/HMDB0125600	Extracellular	Organic oxygen compounds	Organooxygen compounds	Carbohydrates and carbohydrate conjugates	O-glycosyl compounds
M787T173	(M+H)+	1,2-dioleoyl-sn-glycero-3-phosphatidylcholine	3.00087	1.85233	0.0356092	786.599	172.605	69336.1	80713.1	110712	155254	183935	147822	164995	352520	146924	239113	342832	138734	170197	162563	162537
M191T154	(M-H2O-H)-	D-Galactarate	2.86419	1.83114	0.0810141	191.019	153.582	60552.5	79622.2	156882	39891.2	49358.2	91307.2	127853	155185	269187	103274	163563	55515.3	57870.1	62405.5	57979	C00879	HMDB0000639	Cytoplasm (predicted from logP)	Organic oxygen compounds	Organooxygen compounds	Carbohydrates and carbohydrate conjugates	Glucuronic acid derivatives
M191T154	(M-H2O-H)-	D-Galactarate	2.86419	1.83114	0.0810141	191.019	153.582	60552.5	79622.2	156882	39891.2	49358.2	91307.2	127853	155185	269187	103274	163563	55515.3	57870.1	62405.5	57979	C00879	HMDB0000639	Cytoplasm (predicted from logP)	Organic oxygen compounds	Organooxygen compounds	Carbohydrates and carbohydrate conjugates	Glucuronic acid derivatives
M779T234	(M-H+2Na)+	PC(16:0/16:0)	2.73905	2.065	0.0254996	778.536	233.842	11264.2	14635.1	80645.7	36601.5	149189	171311	161479	204737	183620	123176	165001	119418	99053.8	82226	98241	C00157	HMDB0000564/HMDB0007878/HMDB0007879/HMDB0007880/HMDB0007882/HMDB0007884/HMDB0007886/HMDB0007887/HMDB0007897/HMDB0007898/HMDB0007911/HMDB0007912/HMDB0007913/HMDB0007914/HMDB0007936/HMDB0007937/HMDB0007938/HMDB0007939/HMDB0007940/HMDB0007958/HMDB0007959/HMDB0007960/HMDB0007961/HMDB0007964/HMDB0007966/HMDB0007967/HMDB0007981/HMDB0007982/HMDB0007983/HMDB0007984/HMDB0007985/HMDB0008002/HMDB0008003/HMD…	Cytoplasm;Extracellular;Membrane	Lipids and lipid-like molecules	Glycerophospholipids	Glycerophosphocholines	Phosphatidylcholines//1-acyl,2-(1Z-alkenyl)-glycerophosphocholines
M171T795	(M-H)-	Glycerol 3-phosphate	2.65561	2.5301	0.078448	171.006	795.13	33134	39563.3	41616.9	19853.8	49822.5	48600.5	30091.9	32860.4	208529	54722.3	160459	101815	34404.7	34469.4	35599.5	C00093	HMDB0000126	Cytoplasm;Mitochondria	Lipids and lipid-like molecules	Glycerophospholipids	Glycerophosphates	Glycerophosphates
M171T795	(M-H)-	Glycerol 3-phosphate	2.65561	2.5301	0.078448	171.006	795.13	33134	39563.3	41616.9	19853.8	49822.5	48600.5	30091.9	32860.4	208529	54722.3	160459	101815	34404.7	34469.4	35599.5	C00093	HMDB0000126	Cytoplasm;Mitochondria	Lipids and lipid-like molecules	Glycerophospholipids	Glycerophosphates	Glycerophosphates
M401T54_2	(M+H)+	7-Oxocholesterol	2.50569	1.88338	0.117843	401.34	53.548	48765.4	59646.8	34889.8	26809.5	52301.9	46088.2	52902	62081	36138.2	111358	58434.2	184777	51482.7	50347.5	51731.3
M309T70_2	(M-H)-	2E-Eicosenoic acid	2.33121	1.80461	0.0624965	309.279	69.677	39555.8	39648.1	34272.7	27833	24191.4	37765.4	42046.4	64413.6	45176.9	80117.8	23995	111067	42040.8	42621.7	42759.4
M309T70_2	(M-H)-	2E-Eicosenoic acid	2.33121	1.80461	0.0624965	309.279	69.677	39555.8	39648.1	34272.7	27833	24191.4	37765.4	42046.4	64413.6	45176.9	80117.8	23995	111067	42040.8	42621.7	42759.4
M732T356	(M+H)+	Sphingomyelin (d18:1/18:0)	2.16369	2.10587	0.0409955	731.603	355.888	20453.2	9521.25	27479.7	58542	31079.2	34415.8	73224.7	25091.9	50700.1	81659.7	41195.4	110326	29258.3	27921.2	27892	C00550	HMDB0001348/HMDB0010168/HMDB0010169/HMDB0011698/HMDB0011699/HMDB0012084/HMDB0012085/HMDB0012087/HMDB0012088/HMDB0012089/HMDB0012090/HMDB0012091/HMDB0012092/HMDB0012093/HMDB0012094/HMDB0012095/HMDB0012096/HMDB0012100/HMDB0012101/HMDB0012102/HMDB0012103/HMDB0012104/HMDB0012105/HMDB0012107/HMDB0013461/HMDB0013462/HMDB0013463/HMDB0013464/HMDB0013465/HMDB0013466/HMDB0013467/HMDB0013468/HMDB0013469	Extracellular;Membrane	Lipids and lipid-like molecules	Sphingolipids	Phosphosphingolipids	Phosphosphingolipids
M284T892	(M+H-H2O)+	N-Acetyl-D-Glucosamine 6-Phosphate	2.03843	1.70003	0.0482302	284.053	891.706	49510.9	63653.9	32518.9	10236.8	26047.3	47189.5	36636	69189.6	75907	72264.3	41232.7	94344.9	31531.5	32115.1	31530.8	C00357	HMDB0001062	Cytoplasm (predicted from logP)	Organic oxygen compounds	Organooxygen compounds	Carbohydrates and carbohydrate conjugates	Acylaminosugars
M184T81	(M+H)+	Phosphorylcholine	2.02653	1.82839	0.0770759	184.072	80.767	37275.5	29448.7	78167.2	39531.7	65630.8	29537.5	37218.3	67569.9	117872	69184.3	63331.7	156027	34361.2	41427.3	41246.3	C00588	HMDB0001565	Cytoplasm (predicted from logP)	Organic nitrogen compounds	Organonitrogen compounds	Quaternary ammonium salts	Phosphocholines
M401T676	(M+CH3COO)-	Galactinol	1.93924	2.31129	0.104612	401.129	675.919	27783.3	6123.53	15421.8	35336	22226.6	7454.22	76762.7	33136.5	15628.2	13744.2	34060.6	90953.2	15057	15262	15561	C01235	HMDB0005826	Cellular Locations Not Available	Organic oxygen compounds	Organooxygen compounds	Carbohydrates and carbohydrate conjugates	O-glycosyl compounds
M241T75	(M-H)-	Pentadecanoic Acid	1.88489	1.62702	0.0233176	241.216	75.1945	21045.9	3875.2	40250.5	24378.8	41846.1	43692.5	46861.7	45259.8	52581.3	48073.5	37522.8	54574.6	37381.9	37466.9	39318.6	C16537	HMDB0000826	Cytoplasm;Extracellular;Membrane	Lipids and lipid-like molecules	Fatty Acyls	Fatty acids and conjugates	Long-chain fatty acids
M241T75	(M-H)-	Pentadecanoic Acid	1.88489	1.62702	0.0233176	241.216	75.1945	21045.9	3875.2	40250.5	24378.8	41846.1	43692.5	46861.7	45259.8	52581.3	48073.5	37522.8	54574.6	37381.9	37466.9	39318.6	C16537	HMDB0000826	Cytoplasm;Extracellular;Membrane	Lipids and lipid-like molecules	Fatty Acyls	Fatty acids and conjugates	Long-chain fatty acids
M147T141	(M-H)-	D-Arabinono-1,4-lactone	1.67615	1.93163	0.0475117	147.029	141	22925.4	25038.4	35372.5	6168.7	21033.6	20001.3	49176.6	22084.5	61191	38173.1	64625.9	16904.1	17076.8	16710.4	17065.2
M147T141	(M-H)-	D-Arabinono-1,4-lactone	1.67615	1.93163	0.0475117	147.029	141	22925.4	25038.4	35372.5	6168.7	21033.6	20001.3	49176.6	22084.5	61191	38173.1	64625.9	16904.1	17076.8	16710.4	17065.2
M212T877	(M+H)+	Phosphocreatine	1.64052	5.20635	0.0198118	212.042	876.96	2798.3	5756.12	4758.47	1417.84	7652.28	6996.5	3777.7	12090.7	24456.7	39937.9	20013.5	52683.7	17341.8	17342.4	17451.4	C02305	HMDB0001511	Mitochondria	Organic acids and derivatives	Carboxylic acids and derivatives	Amino acids, peptides, and analogues	Alpha amino acids and derivatives
M290T878	(M+H)+	Asp-Arg	1.27594	2.52761	0.120117	290.145	878.148	2035.74	20414.1	4418.37	2548.28	4889.16	4424.82	9527.04	28780.7	3188.22	26995.8	2936.51	26467.1	12309.1	12748.2	12747.7
M787T366	M+	N-Docosanoyl-4-sphingenyl-1-O-phosphorylcholine	1.0657	1.56414	0.0738162	786.651	365.913	8017.78	19612.6	7808.64	8997.03	9344.59	22247.6	18878.2	28839.1	10702.6	22599.5	18600.4	19299.5	20004.4	20000.7	20187.3
M173T856	(M+H)+	Glycerol 3-phosphate	1.04242	2.50039	0.0760752	173.02	855.994	16389.2	19356.2	18810.2	11545.8	23211.8	26833.5	14616.9	16266.7	94279.2	24931.3	86717.7	53600.5	16373.8	16759.5	16721.5	C00093	HMDB0000126	Cytoplasm;Mitochondria	Lipids and lipid-like molecules	Glycerophospholipids	Glycerophosphates	Glycerophosphates
M302T76	(M+H)+	Sphinganine	0.923462	1.85602	0.0934372	302.304	76.41	3506.02	5169.14	12996.7	22656	6542.06	6896.41	23006.6	15766.3	9567.58	11083.7	16181.6	31609.6	4822.13	4823.65	4900.73	C00836	HMDB0000269	Cytoplasm;Extracellular;Membrane (predicted from logP);Endoplasmic reticulum	Organic nitrogen compounds	Organonitrogen compounds	Amines	1,2-aminoalcohols
M204T118	(M-H)-	Pantothenol	0.721486	1.6667	0.0612519	204.124	118.183	1420.11	3982.45	2511.02	8879.76	4940.3	4523.84	10998.8	6660.9	7505.68	4095.77	7443.91	7058.24	2450.5	2466.83	2184.69	C05944	HMDB0004231	Cytoplasm (predicted from logP)	Lipids and lipid-like molecules	Fatty Acyls	Fatty amides	N-acyl amines
M362T813	(M-H)-	Guanosine 5'-monophosphate (GMP)	0.644809	1.66779	0.377311	362.05	813.39	2882.97	8724.22	2622.4	2050.97	4190.34	3042.31	2378.9	4855.23	3476.61	2830.23	6206.29	19467.8	1917.85	1781.75	1917.01	C00144	HMDB0001397	Extracellular;Mitochondria;Nucleus;Lysosome;Golgi apparatus	Lipids and lipid-like molecules	Fatty Acyls	Eicosanoids	Prostaglandins and related compounds
M71T139	(M-H2O-H)-	Dihydroxyacetone	0.574923	2.11337	0.0326474	71.0133	138.971	1657.98	3486.19	2114.88	188.555	2014.87	1326.8	2872.61	3503.5	6296.34	5355.52	2668.55	2105.23	856.748	1592.12	1073.28	C00184	HMDB0001882	Cytoplasm (predicted from logP)	Organic oxygen compounds	Organooxygen compounds	Carbohydrates and carbohydrate conjugates	Monosaccharides
M103T434	(M-H)-	D(-)-beta-hydroxy butyric acid	0.556789	2.46798	0.106051	103.04	433.609	2204.49	1771.15	1266.15	690.569	594.433	2525.31	4858.94	1971.57	1621.59	8790.4	777.917	4319.97	2766.12	2794.49	3135.4
M137T602	M+	1-Methylnicotinamide	0.553987	1.87487	0.176451	137.07	602.153	5186.57	6216.35	2472.55	3234.22	3493.62	2432.28	3655.37	5912.18	9122.44	2729.21	4438.36	17331.2	2834.51	2847.81	2834.53	C02918	HMDB0000699	Cytoplasm;Extracellular	Organoheterocyclic compounds	Pyridines and derivatives	Pyridinecarboxylic acids and derivatives	Nicotinamides
M112T797	(M+H)+	Histamine	0.534709	1.63495	0.472021	112.086	797.014	5859.9	5790.9	3430.87	3262.99	2191.83	4072.34	1676.44	1521.44	5223.29	3528.33	4697.96	23586.7	6200.54	4757.61	4597.77	C00388	HMDB0000870/HMDB0060263	Extracellular	Organic nitrogen compounds	Organonitrogen compounds	Amines	2-arylethylamines
M255T74	(M+H)+	Daidzein	0.497472	2.532	0.38253	255.065	74.231	33370	11068.4	6910.84	4625.26	16095	2169.57	13179.3	12853.9	131705	2968.03	6793.21	20473.5	1990.49	1993.63	2108.02	C10208	HMDB0003312	Membrane (predicted from logP)	Phenylpropanoids and polyketides	Isoflavonoids	Isoflav-2-enes	Isoflavones
M338T15	(M+H)+	Erucamide	0.407553	1.60126	0.10261	338.341	15.468	2502.96	2307.49	2134.43	2572.93	2431.59	2426.55	2710.1	6927.99	2667.59	2077.26	3011.59	5625.16	2601.78	2601.8	2594.88
M285T35	(M+H)+	Glycitein	0.334882	1.79702	0.484024	285.076	35.419	12113.8	15552.5	4113.84	3717.31	4083.93	926.184	6800.8	8730.53	46882.3	1955.59	2723.79	5699.95	849.635	847.369	894.925	C14536	HMDB0005781	Membrane (predicted from logP)	Phenylpropanoids and polyketides	Isoflavonoids	Isoflav-2-enes	Isoflavones
M257T67	(M+H-H2O)+	Fisetinidol	0.293173	2.44104	0.399583	257.08	67.2885	10168.6	7586.76	2426.39	3362.57	3684.84	1365.98	6268.28	5106.61	49863.9	923.262	3229.46	4410.38	751.48	739.784	806.91
M91T193	(M-H)-	Glycerol	0.277422	1.67934	0.0216152	91.0392	192.805	227.441	472.78	696.091	546.067	776.43	920.702	970.639	1392.77	545.339	1106.27	1128.23	968.742	634.77	637.093	669.312	C00116	HMDB0000131	Extracellular;Mitochondria	Organic oxygen compounds	Organooxygen compounds	Carbohydrates and carbohydrate conjugates	Sugar alcohols
M324T766	(M-2H+3Na)+	3'-O-methylcytidine	0.27342	1.50616	0.348624	324.054	765.88	468.786	1098.31	988.155	843.919	671.375	1198.01	808.873	803.245	797.434	1374.41	695.852	3455.48	658.511	650.126	572.826
M306T649	(M+H-H2O)+	Cytidine 5'-monophosphate (CMP)	0.244412	1.74101	0.244188	306.048	649.158	718.079	861.746	982.219	869.06	965.016	642.279	610.747	909.694	993.302	688.664	1748.44	3821.04	640.043	626.415	640.016	C00055	HMDB0000095	Extracellular;Mitochondria;Nucleus;Lysosome;Golgi apparatus	Nucleosides, nucleotides, and analogues	Pyrimidine nucleotides	Pyrimidine ribonucleotides	Pyrimidine ribonucleoside monophosphates
M613T992	(M+H)+	Glutathione disulfide	0.232558	2.5084	0.103485	613.158	991.802	770.566	782.739	805.018	703.03	532.267	493.712	700.347	614.432	1057.55	2476.58	4214.84	1188.9	714.925	716.236	902.917	C00127	HMDB0003337	Extracellular;Mitochondria	Organic acids and derivatives	Carboxylic acids and derivatives	Amino acids, peptides, and analogues	Oligopeptides

## Sheet:  description&VIP>1 
name	adduct	description	VIP	Fold change	p-value	m/z	rt(s)	ctl-1	ctl-2	ctl-3	ctl-4	ctl-5	ctl-6	LDHA-cko-1	LDHA-cko-2	LDHA-cko-3	LDHA-cko-4	LDHA-cko-5	LDHA-cko-6	QC-1	QC-2	QC-3	KEGG.ID	HMDB	CellularLocations	SuperClass	Class	SubClass	DirectParent
M227T76	(M-H)-	Myristic acid	4.64757	1.51809	0.00564343	227.201	76.2525	116787	126782	258859	173185	265503	218312	320786	265689	322889	270666	271653	308430	245169	264434	264158	C06424	HMDB0000806	Cytoplasm;Extracellular;Membrane (predicted from logP)	Lipids and lipid-like molecules	Fatty Acyls	Fatty acids and conjugates	Long-chain fatty acids
M227T76	(M-H)-	Myristic acid	4.64757	1.51809	0.00564343	227.201	76.2525	116787	126782	258859	173185	265503	218312	320786	265689	322889	270666	271653	308430	245169	264434	264158	C06424	HMDB0000806	Cytoplasm;Extracellular;Membrane (predicted from logP)	Lipids and lipid-like molecules	Fatty Acyls	Fatty acids and conjugates	Long-chain fatty acids
M279T74_2	(M-H)-	Linoleic acid	16.627	1.70623	0.0168465	279.233	73.543	1.84141e+06	2.37851e+06	2.22125e+06	639035	1.81741e+06	1.73676e+06	2.47544e+06	3.48852e+06	2.44462e+06	4.29232e+06	1.93886e+06	3.50494e+06	2.59875e+06	2.60178e+06	2.66485e+06	C01595	HMDB0000673	Cytoplasm;Extracellular;Membrane (predicted from logP)	Lipids and lipid-like molecules	Fatty Acyls	Lineolic acids and derivatives	Lineolic acids and derivatives
M279T74_2	(M-H)-	Linoleic acid	16.627	1.70623	0.0168465	279.233	73.543	1.84141e+06	2.37851e+06	2.22125e+06	639035	1.81741e+06	1.73676e+06	2.47544e+06	3.48852e+06	2.44462e+06	4.29232e+06	1.93886e+06	3.50494e+06	2.59875e+06	2.60178e+06	2.66485e+06	C01595	HMDB0000673	Cytoplasm;Extracellular;Membrane (predicted from logP)	Lipids and lipid-like molecules	Fatty Acyls	Lineolic acids and derivatives	Lineolic acids and derivatives
M212T877	(M+H)+	Phosphocreatine	1.64052	5.20635	0.0198118	212.042	876.96	2798.3	5756.12	4758.47	1417.84	7652.28	6996.5	3777.7	12090.7	24456.7	39937.9	20013.5	52683.7	17341.8	17342.4	17451.4	C02305	HMDB0001511	Mitochondria	Organic acids and derivatives	Carboxylic acids and derivatives	Amino acids, peptides, and analogues	Alpha amino acids and derivatives
M241T75	(M-H)-	Pentadecanoic Acid	1.88489	1.62702	0.0233176	241.216	75.1945	21045.9	3875.2	40250.5	24378.8	41846.1	43692.5	46861.7	45259.8	52581.3	48073.5	37522.8	54574.6	37381.9	37466.9	39318.6	C16537	HMDB0000826	Cytoplasm;Extracellular;Membrane	Lipids and lipid-like molecules	Fatty Acyls	Fatty acids and conjugates	Long-chain fatty acids
M241T75	(M-H)-	Pentadecanoic Acid	1.88489	1.62702	0.0233176	241.216	75.1945	21045.9	3875.2	40250.5	24378.8	41846.1	43692.5	46861.7	45259.8	52581.3	48073.5	37522.8	54574.6	37381.9	37466.9	39318.6	C16537	HMDB0000826	Cytoplasm;Extracellular;Membrane	Lipids and lipid-like molecules	Fatty Acyls	Fatty acids and conjugates	Long-chain fatty acids
M779T234	(M-H+2Na)+	PC(16:0/16:0)	2.73905	2.065	0.0254996	778.536	233.842	11264.2	14635.1	80645.7	36601.5	149189	171311	161479	204737	183620	123176	165001	119418	99053.8	82226	98241	C00157	HMDB0000564/HMDB0007878/HMDB0007879/HMDB0007880/HMDB0007882/HMDB0007884/HMDB0007886/HMDB0007887/HMDB0007897/HMDB0007898/HMDB0007911/HMDB0007912/HMDB0007913/HMDB0007914/HMDB0007936/HMDB0007937/HMDB0007938/HMDB0007939/HMDB0007940/HMDB0007958/HMDB0007959/HMDB0007960/HMDB0007961/HMDB0007964/HMDB0007966/HMDB0007967/HMDB0007981/HMDB0007982/HMDB0007983/HMDB0007984/HMDB0007985/HMDB0008002/HMDB0008003/HMD…	Cytoplasm;Extracellular;Membrane	Lipids and lipid-like molecules	Glycerophospholipids	Glycerophosphocholines	Phosphatidylcholines//1-acyl,2-(1Z-alkenyl)-glycerophosphocholines
M787T173	(M+H)+	1,2-dioleoyl-sn-glycero-3-phosphatidylcholine	3.00087	1.85233	0.0356092	786.599	172.605	69336.1	80713.1	110712	155254	183935	147822	164995	352520	146924	239113	342832	138734	170197	162563	162537
M732T356	(M+H)+	Sphingomyelin (d18:1/18:0)	2.16369	2.10587	0.0409955	731.603	355.888	20453.2	9521.25	27479.7	58542	31079.2	34415.8	73224.7	25091.9	50700.1	81659.7	41195.4	110326	29258.3	27921.2	27892	C00550	HMDB0001348/HMDB0010168/HMDB0010169/HMDB0011698/HMDB0011699/HMDB0012084/HMDB0012085/HMDB0012087/HMDB0012088/HMDB0012089/HMDB0012090/HMDB0012091/HMDB0012092/HMDB0012093/HMDB0012094/HMDB0012095/HMDB0012096/HMDB0012100/HMDB0012101/HMDB0012102/HMDB0012103/HMDB0012104/HMDB0012105/HMDB0012107/HMDB0013461/HMDB0013462/HMDB0013463/HMDB0013464/HMDB0013465/HMDB0013466/HMDB0013467/HMDB0013468/HMDB0013469	Extracellular;Membrane	Lipids and lipid-like molecules	Sphingolipids	Phosphosphingolipids	Phosphosphingolipids
M147T141	(M-H)-	D-Arabinono-1,4-lactone	1.67615	1.93163	0.0475117	147.029	141	22925.4	25038.4	35372.5	6168.7	21033.6	20001.3	49176.6	22084.5	61191	38173.1	64625.9	16904.1	17076.8	16710.4	17065.2
M147T141	(M-H)-	D-Arabinono-1,4-lactone	1.67615	1.93163	0.0475117	147.029	141	22925.4	25038.4	35372.5	6168.7	21033.6	20001.3	49176.6	22084.5	61191	38173.1	64625.9	16904.1	17076.8	16710.4	17065.2
M284T892	(M+H-H2O)+	N-Acetyl-D-Glucosamine 6-Phosphate	2.03843	1.70003	0.0482302	284.053	891.706	49510.9	63653.9	32518.9	10236.8	26047.3	47189.5	36636	69189.6	75907	72264.3	41232.7	94344.9	31531.5	32115.1	31530.8	C00357	HMDB0001062	Cytoplasm (predicted from logP)	Organic oxygen compounds	Organooxygen compounds	Carbohydrates and carbohydrate conjugates	Acylaminosugars
M759T98	(M+Na)+	Thioetheramide-PC	13.2989	2.27745	0.0532672	758.567	98.436	838988	693614	892996	883840	1.15318e+06	1.12149e+06	1.24844e+06	1.82188e+06	2.34111e+06	2.54839e+06	446724	4.31101e+06	1.33412e+06	1.33421e+06	1.31367e+06
M277T74_2	(M-H)-	all cis-(6,9,12)-Linolenic acid	5.37196	1.60971	0.054808	277.216	74.101	222701	296756	305368	85050.7	225587	248796	291102	478122	293686	584598	214287	366457	331200	339866	339366	C06426	HMDB0003073	Cytoplasm;Extracellular;Membrane (predicted from logP)
M277T74_2	(M-H)-	all cis-(6,9,12)-Linolenic acid	5.37196	1.60971	0.054808	277.216	74.101	222701	296756	305368	85050.7	225587	248796	291102	478122	293686	584598	214287	366457	331200	339866	339366	C06426	HMDB0003073	Cytoplasm;Extracellular;Membrane (predicted from logP)
M811T259	(M+Na)+	1-Stearoyl-2-oleoyl-sn-glycerol 3-phosphocholine (SOPC)	7.06788	1.98258	0.0569266	810.597	259.33	118954	160522	335832	418821	442791	478517	616823	523970	404175	1.25271e+06	334876	744254	607773	537530	527052	C00157	HMDB0000564/HMDB0007878/HMDB0007879/HMDB0007880/HMDB0007882/HMDB0007884/HMDB0007886/HMDB0007887/HMDB0007897/HMDB0007898/HMDB0007911/HMDB0007912/HMDB0007913/HMDB0007914/HMDB0007936/HMDB0007937/HMDB0007938/HMDB0007939/HMDB0007940/HMDB0007958/HMDB0007959/HMDB0007960/HMDB0007961/HMDB0007964/HMDB0007966/HMDB0007967/HMDB0007981/HMDB0007982/HMDB0007983/HMDB0007984/HMDB0007985/HMDB0008002/HMDB0008003/HMD…	Cytoplasm;Extracellular;Membrane	Lipids and lipid-like molecules	Glycerophospholipids	Glycerophosphocholines	Phosphatidylcholines//1-acyl,2-(1Z-alkenyl)-glycerophosphocholines
M309T70_2	(M-H)-	2E-Eicosenoic acid	2.33121	1.80461	0.0624965	309.279	69.677	39555.8	39648.1	34272.7	27833	24191.4	37765.4	42046.4	64413.6	45176.9	80117.8	23995	111067	42040.8	42621.7	42759.4
M309T70_2	(M-H)-	2E-Eicosenoic acid	2.33121	1.80461	0.0624965	309.279	69.677	39555.8	39648.1	34272.7	27833	24191.4	37765.4	42046.4	64413.6	45176.9	80117.8	23995	111067	42040.8	42621.7	42759.4
M787T366	M+	N-Docosanoyl-4-sphingenyl-1-O-phosphorylcholine	1.0657	1.56414	0.0738162	786.651	365.913	8017.78	19612.6	7808.64	8997.03	9344.59	22247.6	18878.2	28839.1	10702.6	22599.5	18600.4	19299.5	20004.4	20000.7	20187.3
M173T856	(M+H)+	Glycerol 3-phosphate	1.04242	2.50039	0.0760752	173.02	855.994	16389.2	19356.2	18810.2	11545.8	23211.8	26833.5	14616.9	16266.7	94279.2	24931.3	86717.7	53600.5	16373.8	16759.5	16721.5	C00093	HMDB0000126	Cytoplasm;Mitochondria	Lipids and lipid-like molecules	Glycerophospholipids	Glycerophosphates	Glycerophosphates
M279T75	(M+H)+	alpha-Linolenic acid	4.29497	1.51201	0.0764766	279.231	74.864	231036	182590	264486	56754.6	235419	518999	369021	401908	335794	391581	319299	434204	279433	281167	279433	C06427	HMDB0001388	Cytoplasm;Extracellular;Membrane (predicted from logP)	Lipids and lipid-like molecules	Fatty Acyls	Lineolic acids and derivatives	Lineolic acids and derivatives
M184T81	(M+H)+	Phosphorylcholine	2.02653	1.82839	0.0770759	184.072	80.767	37275.5	29448.7	78167.2	39531.7	65630.8	29537.5	37218.3	67569.9	117872	69184.3	63331.7	156027	34361.2	41427.3	41246.3	C00588	HMDB0001565	Cytoplasm (predicted from logP)	Organic nitrogen compounds	Organonitrogen compounds	Quaternary ammonium salts	Phosphocholines
M171T795	(M-H)-	Glycerol 3-phosphate	2.65561	2.5301	0.078448	171.006	795.13	33134	39563.3	41616.9	19853.8	49822.5	48600.5	30091.9	32860.4	208529	54722.3	160459	101815	34404.7	34469.4	35599.5	C00093	HMDB0000126	Cytoplasm;Mitochondria	Lipids and lipid-like molecules	Glycerophospholipids	Glycerophosphates	Glycerophosphates
M171T795	(M-H)-	Glycerol 3-phosphate	2.65561	2.5301	0.078448	171.006	795.13	33134	39563.3	41616.9	19853.8	49822.5	48600.5	30091.9	32860.4	208529	54722.3	160459	101815	34404.7	34469.4	35599.5	C00093	HMDB0000126	Cytoplasm;Mitochondria	Lipids and lipid-like molecules	Glycerophospholipids	Glycerophosphates	Glycerophosphates
M191T154	(M-H2O-H)-	D-Galactarate	2.86419	1.83114	0.0810141	191.019	153.582	60552.5	79622.2	156882	39891.2	49358.2	91307.2	127853	155185	269187	103274	163563	55515.3	57870.1	62405.5	57979	C00879	HMDB0000639	Cytoplasm (predicted from logP)	Organic oxygen compounds	Organooxygen compounds	Carbohydrates and carbohydrate conjugates	Glucuronic acid derivatives
M191T154	(M-H2O-H)-	D-Galactarate	2.86419	1.83114	0.0810141	191.019	153.582	60552.5	79622.2	156882	39891.2	49358.2	91307.2	127853	155185	269187	103274	163563	55515.3	57870.1	62405.5	57979	C00879	HMDB0000639	Cytoplasm (predicted from logP)	Organic oxygen compounds	Organooxygen compounds	Carbohydrates and carbohydrate conjugates	Glucuronic acid derivatives
M341T676	(M-H)-	Sucrose	3.33567	2.43927	0.100816	341.108	676.018	77077.3	19476.3	39221.4	98795.6	67217.2	20727.3	261103	93468	46880.4	31458.8	105490	248301	44862.2	45952.9	45951.9	C00089	HMDB0000258/HMDB0125600	Extracellular	Organic oxygen compounds	Organooxygen compounds	Carbohydrates and carbohydrate conjugates	O-glycosyl compounds
M401T676	(M+CH3COO)-	Galactinol	1.93924	2.31129	0.104612	401.129	675.919	27783.3	6123.53	15421.8	35336	22226.6	7454.22	76762.7	33136.5	15628.2	13744.2	34060.6	90953.2	15057	15262	15561	C01235	HMDB0005826	Cellular Locations Not Available	Organic oxygen compounds	Organooxygen compounds	Carbohydrates and carbohydrate conjugates	O-glycosyl compounds
M401T54_2	(M+H)+	7-Oxocholesterol	2.50569	1.88338	0.117843	401.34	53.548	48765.4	59646.8	34889.8	26809.5	52301.9	46088.2	52902	62081	36138.2	111358	58434.2	184777	51482.7	50347.5	51731.3
M290T878	(M+H)+	Asp-Arg	1.27594	2.52761	0.120117	290.145	878.148	2035.74	20414.1	4418.37	2548.28	4889.16	4424.82	9527.04	28780.7	3188.22	26995.8	2936.51	26467.1	12309.1	12748.2	12747.7
M482T382	(M+H)+	1-Stearoyl-2-hydroxy-sn-glycero-3-phosphoethanolamine	4.18303	1.90528	0.265924	482.324	381.784	362156	178125	63752	60530	63297.5	51333.8	538980	461061	119872	258387	55756.3	50524.2	354314	360344	360345

## Sheet: VIP>1&P<0.05
name	adduct	description	VIP	Fold change	p-value	m/z	rt(s)	ctl-1	ctl-2	ctl-3	ctl-4	ctl-5	ctl-6	LDHA-cko-1	LDHA-cko-2	LDHA-cko-3	LDHA-cko-4	LDHA-cko-5	LDHA-cko-6	QC-1	QC-2	QC-3	KEGG.ID	HMDB	CellularLocations	SuperClass	Class	SubClass	DirectParent
M227T76	(M-H)-	Myristic acid	4.64757	1.51809	0.00564343	227.201	76.2525	116787	126782	258859	173185	265503	218312	320786	265689	322889	270666	271653	308430	245169	264434	264158	C06424	HMDB0000806	Cytoplasm;Extracellular;Membrane (predicted from logP)	Lipids and lipid-like molecules	Fatty Acyls	Fatty acids and conjugates	Long-chain fatty acids
M227T76	(M-H)-	Myristic acid	4.64757	1.51809	0.00564343	227.201	76.2525	116787	126782	258859	173185	265503	218312	320786	265689	322889	270666	271653	308430	245169	264434	264158	C06424	HMDB0000806	Cytoplasm;Extracellular;Membrane (predicted from logP)	Lipids and lipid-like molecules	Fatty Acyls	Fatty acids and conjugates	Long-chain fatty acids
M279T74_2	(M-H)-	Linoleic acid	16.627	1.70623	0.0168465	279.233	73.543	1.84141e+06	2.37851e+06	2.22125e+06	639035	1.81741e+06	1.73676e+06	2.47544e+06	3.48852e+06	2.44462e+06	4.29232e+06	1.93886e+06	3.50494e+06	2.59875e+06	2.60178e+06	2.66485e+06	C01595	HMDB0000673	Cytoplasm;Extracellular;Membrane (predicted from logP)	Lipids and lipid-like molecules	Fatty Acyls	Lineolic acids and derivatives	Lineolic acids and derivatives
M279T74_2	(M-H)-	Linoleic acid	16.627	1.70623	0.0168465	279.233	73.543	1.84141e+06	2.37851e+06	2.22125e+06	639035	1.81741e+06	1.73676e+06	2.47544e+06	3.48852e+06	2.44462e+06	4.29232e+06	1.93886e+06	3.50494e+06	2.59875e+06	2.60178e+06	2.66485e+06	C01595	HMDB0000673	Cytoplasm;Extracellular;Membrane (predicted from logP)	Lipids and lipid-like molecules	Fatty Acyls	Lineolic acids and derivatives	Lineolic acids and derivatives
M212T877	(M+H)+	Phosphocreatine	1.64052	5.20635	0.0198118	212.042	876.96	2798.3	5756.12	4758.47	1417.84	7652.28	6996.5	3777.7	12090.7	24456.7	39937.9	20013.5	52683.7	17341.8	17342.4	17451.4	C02305	HMDB0001511	Mitochondria	Organic acids and derivatives	Carboxylic acids and derivatives	Amino acids, peptides, and analogues	Alpha amino acids and derivatives
M241T75	(M-H)-	Pentadecanoic Acid	1.88489	1.62702	0.0233176	241.216	75.1945	21045.9	3875.2	40250.5	24378.8	41846.1	43692.5	46861.7	45259.8	52581.3	48073.5	37522.8	54574.6	37381.9	37466.9	39318.6	C16537	HMDB0000826	Cytoplasm;Extracellular;Membrane	Lipids and lipid-like molecules	Fatty Acyls	Fatty acids and conjugates	Long-chain fatty acids
M241T75	(M-H)-	Pentadecanoic Acid	1.88489	1.62702	0.0233176	241.216	75.1945	21045.9	3875.2	40250.5	24378.8	41846.1	43692.5	46861.7	45259.8	52581.3	48073.5	37522.8	54574.6	37381.9	37466.9	39318.6	C16537	HMDB0000826	Cytoplasm;Extracellular;Membrane	Lipids and lipid-like molecules	Fatty Acyls	Fatty acids and conjugates	Long-chain fatty acids
M779T234	(M-H+2Na)+	PC(16:0/16:0)	2.73905	2.065	0.0254996	778.536	233.842	11264.2	14635.1	80645.7	36601.5	149189	171311	161479	204737	183620	123176	165001	119418	99053.8	82226	98241	C00157	HMDB0000564/HMDB0007878/HMDB0007879/HMDB0007880/HMDB0007882/HMDB0007884/HMDB0007886/HMDB0007887/HMDB0007897/HMDB0007898/HMDB0007911/HMDB0007912/HMDB0007913/HMDB0007914/HMDB0007936/HMDB0007937/HMDB0007938/HMDB0007939/HMDB0007940/HMDB0007958/HMDB0007959/HMDB0007960/HMDB0007961/HMDB0007964/HMDB0007966/HMDB0007967/HMDB0007981/HMDB0007982/HMDB0007983/HMDB0007984/HMDB0007985/HMDB0008002/HMDB0008003/HMD…	Cytoplasm;Extracellular;Membrane	Lipids and lipid-like molecules	Glycerophospholipids	Glycerophosphocholines	Phosphatidylcholines//1-acyl,2-(1Z-alkenyl)-glycerophosphocholines
M787T173	(M+H)+	1,2-dioleoyl-sn-glycero-3-phosphatidylcholine	3.00087	1.85233	0.0356092	786.599	172.605	69336.1	80713.1	110712	155254	183935	147822	164995	352520	146924	239113	342832	138734	170197	162563	162537
M732T356	(M+H)+	Sphingomyelin (d18:1/18:0)	2.16369	2.10587	0.0409955	731.603	355.888	20453.2	9521.25	27479.7	58542	31079.2	34415.8	73224.7	25091.9	50700.1	81659.7	41195.4	110326	29258.3	27921.2	27892	C00550	HMDB0001348/HMDB0010168/HMDB0010169/HMDB0011698/HMDB0011699/HMDB0012084/HMDB0012085/HMDB0012087/HMDB0012088/HMDB0012089/HMDB0012090/HMDB0012091/HMDB0012092/HMDB0012093/HMDB0012094/HMDB0012095/HMDB0012096/HMDB0012100/HMDB0012101/HMDB0012102/HMDB0012103/HMDB0012104/HMDB0012105/HMDB0012107/HMDB0013461/HMDB0013462/HMDB0013463/HMDB0013464/HMDB0013465/HMDB0013466/HMDB0013467/HMDB0013468/HMDB0013469	Extracellular;Membrane	Lipids and lipid-like molecules	Sphingolipids	Phosphosphingolipids	Phosphosphingolipids
M147T141	(M-H)-	D-Arabinono-1,4-lactone	1.67615	1.93163	0.0475117	147.029	141	22925.4	25038.4	35372.5	6168.7	21033.6	20001.3	49176.6	22084.5	61191	38173.1	64625.9	16904.1	17076.8	16710.4	17065.2
M147T141	(M-H)-	D-Arabinono-1,4-lactone	1.67615	1.93163	0.0475117	147.029	141	22925.4	25038.4	35372.5	6168.7	21033.6	20001.3	49176.6	22084.5	61191	38173.1	64625.9	16904.1	17076.8	16710.4	17065.2
M284T892	(M+H-H2O)+	N-Acetyl-D-Glucosamine 6-Phosphate	2.03843	1.70003	0.0482302	284.053	891.706	49510.9	63653.9	32518.9	10236.8	26047.3	47189.5	36636	69189.6	75907	72264.3	41232.7	94344.9	31531.5	32115.1	31530.8	C00357	HMDB0001062	Cytoplasm (predicted from logP)	Organic oxygen compounds	Organooxygen compounds	Carbohydrates and carbohydrate conjugates	Acylaminosugars
