# Supplementary material for: Ldha-Dependent Metabolic Programs in Sertoli Cells Regulate Spermiogenesis in Mouse Testis
Source: Biology (Basel). 2022 Dec 9;11(12):1791. doi: 10.3390/biology11121791 (PMC9775226; doi:10.3390/biology11121791)
Supplement: Supplementary file 1 [file biology-11-01791-s001.zip › Supplement excel S5 down-metabolites in the Ldha-cKO and control sperm.xlsx]

## Sheet: down-metabolites
name	adduct	description	VIP	Fold change	p-value	m/z	rt(s)	ctl-1	ctl-2	ctl-3	ctl-4	ctl-5	ctl-6	LDHA-cko-1	LDHA-cko-2	LDHA-cko-3	LDHA-cko-4	LDHA-cko-5	LDHA-cko-6	QC-1	QC-2	QC-3	KEGG.ID	HMDB	CellularLocations	SuperClass	Class	SubClass	DirectParent
M204T371	(M-H)-	Xanthurenic acid	0.0804016	0.898279	0.641932	204.033	371.313	1633.62	2421.22	1642.08	2090.82	1069.05	840.262	620.628	1529.31	2344.8	1669.79	1003.1	1543.02	647.896	696.157	686.28	C02470	HMDB0000881	Membrane	Organoheterocyclic compounds	Quinolines and derivatives	Quinoline carboxylic acids	Quinoline carboxylic acids
M153T434_1	(M+H)+	Xanthine	0.356612	0.737456	0.293892	153.04	433.963	37751.7	29535.1	17561.1	15348.6	13177.1	14523.3	17828.6	10402.6	20670.1	5499.38	14116.5	25801.2	9754.74	10109.5	10097.5	C00385	HMDB0000292	Cytoplasm;Peroxisome	Organoheterocyclic compounds	Imidazopyrimidines	Purines and purine derivatives	Xanthines
M151T412	(M-H)-	Xanthine	0.966075	0.651288	0.294028	151.026	411.549	69699.5	155273	51219.1	25164.5	40026.3	36194.6	40071.3	24594.8	48394.1	49367.5	39775.8	43707.7	19209.6	19371.5	20949.5	C00385	HMDB0000292	Cytoplasm;Peroxisome	Organoheterocyclic compounds	Imidazopyrimidines	Purines and purine derivatives	Xanthines
M137T523	(M-H)-	Urocanic acid	0.174141	0.892045	0.824347	137.035	523.245	5061.74	1143.15	778.999	1372.55	1375.86	959.446	1200.93	881.655	1004.47	518.51	4031.86	1900.09	1056.27	1121.39	1035.09	C00785	HMDB0000301/HMDB0034174	Cytoplasm (predicted from logP)	Organoheterocyclic compounds	Azoles	Imidazoles	Imidazolyl carboxylic acids and derivatives
M565T823	(M-H)-	Uridine diphosphate glucose(UDP-D-Glucose)	0.509922	0.489219	0.369088	565.046	823.249	2719.23	31234.7	7556.21	703.772	3171.57	7142.87	4296.29	9146.01	4963.67	1777.33	3546.41	1968.17	2595.31	2978.66	2972.04	C00029	HMDB0000286/HMDB0060079	Endoplasmic reticulum;Golgi apparatus	Nucleosides, nucleotides, and analogues	Pyrimidine nucleotides	Pyrimidine nucleotide sugars	Pyrimidine nucleotide sugars
M323T765	(M-H)-	Uridine 5'-monophosphate (UMP)	0.420345	1.06915	0.922029	323.027	764.602	6905.6	18125.5	1809.4	599.736	1452.88	969.837	1267.41	10718.8	1456.36	2059.47	4307.21	12118.6	1467.17	1184.29	1456	C00105	HMDB0000288	Cytoplasm;Extracellular;Mitochondria;Nucleus;Lysosome;Endoplasmic reticulum;Golgi apparatus	Nucleosides, nucleotides, and analogues	Pyrimidine nucleotides	Pyrimidine ribonucleotides	Pyrimidine ribonucleoside monophosphates
M579T892	(M-H)-	Uridine 5'-diphosphoglucuronic acid (UDP-D-glucuronate)	0.13627	0.90492	0.786788	579.025	891.596	1352.9	6404.47	2765.45	1190.94	2000.34	2050.55	2511.89	2098.09	3818.71	1272.76	3316.83	1247.48	1408	1302.52	1288.31	C00167	HMDB0000935	Endoplasmic reticulum;Golgi apparatus	Nucleosides, nucleotides, and analogues	Pyrimidine nucleotides	Pyrimidine nucleotide sugars	Pyrimidine nucleotide sugars
M405T884	(M+H)+	Uridine 5'-diphosphate (UDP)	0.21587	0.455972	0.366632	405.009	883.984	793.62	10189.2	1722.01	543.192	609.921	2527.31	1137.05	3039.26	1358.67	590.427	640.909	704.885	758.556	758.227	716.32	C00015	HMDB0000295	Cytoplasm;Extracellular;Mitochondria;Nucleus;Lysosome;Endoplasmic reticulum;Golgi apparatus	Nucleosides, nucleotides, and analogues	Pyrimidine nucleotides	Pyrimidine ribonucleotides	Pyrimidine ribonucleoside diphosphates
M403T829	(M-H)-	Uridine 5'-diphosphate (UDP)	0.616848	0.391149	0.339784	402.993	828.774	3237.13	46879	4925.83	1942.76	5471.12	8219.63	3812.73	9298.05	5964.3	2203.85	2888.77	3476.91	2848.59	2637.65	2846.72	C00015	HMDB0000295	Cytoplasm;Extracellular;Mitochondria;Nucleus;Lysosome;Endoplasmic reticulum;Golgi apparatus	Nucleosides, nucleotides, and analogues	Pyrimidine nucleotides	Pyrimidine ribonucleotides	Pyrimidine ribonucleoside diphosphates
M245T317	(M+H)+	Uridine	1.24754	1.12204	0.382175	245.076	317.082	251349	155952	231554	157647	230526	213156	221207	196799	315457	167990	275746	214337	168991	172675	172720	C00299	HMDB0000296	Extracellular;Mitochondria;Nucleus;Lysosome	Nucleosides, nucleotides, and analogues	Pyrimidine nucleosides		Pyrimidine nucleosides
M169T657	(M+H)+	Uric acid	0.0887133	0.747641	0.252198	169.035	657.075	2050.05	1858.15	987.467	1167.23	687.009	718.783	806.926	815.137	1040.52	567.366	1063.13	1290.83	543.116	546.984	486.689	C00366	HMDB0000289	Extracellular;Peroxisome	Organoheterocyclic compounds	Imidazopyrimidines	Purines and purine derivatives	Xanthines
M167T602	(M-H)-	Uric acid	0.277206	0.6776	0.20487	167.021	602.016	26778.1	26135.9	10503.7	13484.1	8688.72	9935.27	8390.89	7772.51	13698.8	8526.14	8462.04	17877.8	6986.95	6986.92	6602.15	C00366	HMDB0000289	Extracellular;Peroxisome	Organoheterocyclic compounds	Imidazopyrimidines	Purines and purine derivatives	Xanthines
M61T183	(M+H)+	Urea	0.606261	0.497787	0.0960107	61.0385	183.133	15087.8	11404.1	6545.51	4033.42	7178.19	2695.95	2916.58	3577.31	7358.57	2094.94	6215.36	1205.86	2216.98	2238.52	1831.97	C00086	HMDB0000294	Extracellular;Mitochondria	Organic acids and derivatives	Organic carbonic acids and derivatives	Ureas	Ureas
M111T470	(M-H)-	Uracil	1.46664	0.50918	0.000920394	111.019	470.481	30844.6	53228.1	44385.4	38046.1	38436.8	34321.7	27227.3	27015.7	20029.4	20483.5	17560.3	9511.77	22200.5	22360.4	20096.9	C00106	HMDB0000300	Extracellular	Organoheterocyclic compounds	Diazines	Pyrimidines and pyrimidine derivatives	Pyrimidones
M111T470	(M-H)-	Uracil	1.46664	0.50918	0.000920394	111.019	470.481	30844.6	53228.1	44385.4	38046.1	38436.8	34321.7	27227.3	27015.7	20029.4	20483.5	17560.3	9511.77	22200.5	22360.4	20096.9	C00106	HMDB0000300	Extracellular	Organoheterocyclic compounds	Diazines	Pyrimidines and pyrimidine derivatives	Pyrimidones
M185T78	(M-H)-	Undecanoic Acid	1.68438	0.151747	0.0116637	185.153	78.4665	20866.4	25604.4	64769.2	56855.9	21916.4	9091.03	9565.48	4077	2826.29	3858.07	6564.24	3322.27	3914.23	3943.14	4162.52	C17715	HMDB0000947	Extracellular;Membrane (predicted from logP)	Lipids and lipid-like molecules	Fatty Acyls	Fatty acids and conjugates	Medium-chain fatty acids
M185T78	(M-H)-	Undecanoic Acid	1.68438	0.151747	0.0116637	185.153	78.4665	20866.4	25604.4	64769.2	56855.9	21916.4	9091.03	9565.48	4077	2826.29	3858.07	6564.24	3322.27	3914.23	3943.14	4162.52	C17715	HMDB0000947	Extracellular;Membrane (predicted from logP)	Lipids and lipid-like molecules	Fatty Acyls	Fatty acids and conjugates	Medium-chain fatty acids
M608T862	(M+H)+	UDP-N-acetylglucosamine	0.337741	0.523314	0.255007	608.088	862.219	3199.75	16418.8	3901.64	2017.59	3223.88	5534.93	3111.11	4837.58	3639.13	1088.99	3321.02	1950.06	2264.26	2210.44	2210.48	C00043	HMDB0000290	Golgi apparatus	Nucleosides, nucleotides, and analogues	Pyrimidine nucleotides	Pyrimidine nucleotide sugars	Pyrimidine nucleotide sugars
M606T804	(M-H)-	UDP-N-acetylglucosamine	1.32939	0.496582	0.30825	606.072	803.904	29751.3	196145	42420.2	12842.8	30630.3	50380.1	29780.3	52718.6	37276	11668.2	32138.8	16264.6	15575.7	15570.6	15788.2	C00043	HMDB0000290	Golgi apparatus	Nucleosides, nucleotides, and analogues	Pyrimidine nucleotides	Pyrimidine nucleotide sugars	Pyrimidine nucleotide sugars
M360T850	(M+CH3CN+Na)+	Tyr-Asp	0.175969	0.766889	0.0858097	360.123	850.057	1909.91	2767.13	2132.45	2074.48	1839.43	1567.7	1660.35	1772.46	1855.44	845.217	2092.26	1200.18	967.386	953.451	1023.91
M120T512	(M+H-H2O)+	Tyramine	2.10184	0.424683	0.0134677	120.08	512.144	171041	121228	60051	111002	75803.9	53543.8	36166.4	27260.1	57745.2	31979	57918.5	40627.8	18865.5	19324.4	19324.7	C00483	HMDB0000306	Cytoplasm	Benzenoids	Benzene and substituted derivatives	Phenethylamines	Phenethylamines
M76T651_2	(M+H)+	Trimethylamine N-oxide	1.67551	0.681921	0.0108071	76.075	650.954	141296	126634	148393	108401	114725	120144	91001.9	81416.9	113791	87824.5	107796	36151.9	58616.6	58617.1	60949.3	C01104	HMDB0000925	Cytoplasm (predicted from logP)	Organic nitrogen compounds	Organonitrogen compounds	Aminoxides	Trialkyl amine oxides
M213T836	(M+CH3CN+Na)+	Triethanolamine	0.735882	0.560326	0.225366	213.123	836.255	46129.2	21935.5	13666.7	7286.92	11384.5	8434.53	7508.98	10184.4	14105.6	5804.59	14947.4	8433.42	5919.74	5676.08	5684.63	C06771	HMDB0032538	Cytoplasm;Extracellular	Organonitrogen compounds	Amines	Alkanolamines	1,2-aminoalcohols
M213T76	(M-H)-	Tridecanoic acid (Tridecylic acid)	0.670146	0.540371	0.085676	213.186	76.362	6459.94	6418.89	20179	22904.1	11006.2	8532.18	8377.27	5344.07	9518.3	4504.53	6415	6639	6551.75	6310.36	6310.11	C17076	HMDB0000910	Extracellular;Membrane (predicted from logP)	Lipids and lipid-like molecules	Fatty Acyls	Fatty acids and conjugates	Long-chain fatty acids
M149T512	(M+H)+	trans-cinnamate	0.458397	0.449433	0.0426021	149.058	512.487	12056.4	5764.24	4139.46	5407.38	4277.05	2807.22	2674.43	1570.15	3227.65	2225.81	3398.42	2387.25	850.841	850.433	729.641	C00423
M127T174	(M+H)+	Thymine	0.558312	0.467285	0.00915285	127.049	174.099	8268.1	8740.15	5376.32	8859.26	6011.62	4226.88	738.715	1430.48	5389.5	2264.3	4701.13	4859.95	2035.92	1322.62	1365.57	C00178	HMDB0000262	Extracellular	Organoheterocyclic compounds	Diazines	Pyrimidines and pyrimidine derivatives	Hydroxypyrimidines
M241T179	(M-H)-	Thymidine	0.717077	0.773611	0.260252	241.082	178.52	99232.4	89680	67309.3	110105	67817.8	31384.2	38516.2	70898.6	92820.1	32652	56634.5	68616.6	15170.5	15165.3	16235.6	C00214	HMDB0000273	Extracellular;Mitochondria;Lysosome	Nucleosides, nucleotides, and analogues	Pyrimidine nucleosides	Pyrimidine 2'-deoxyribonucleosides	Pyrimidine 2'-deoxyribonucleosides
M345T877	(M+H)+	Thiamine monophosphate	0.0183479	0.892524	0.229198	345.07	876.821	1726.23	1451.49	1258.9	1403.64	1239.44	1262.14	1428.09	1356.31	1102.78	861.965	1324.06	1372.09	1320.14	1265.54	1137.86	C01081	HMDB0002666	Cytoplasm;Extracellular;Membrane (predicted from logP);Mitochondria	Organoheterocyclic compounds	Diazines	Pyrimidines and pyrimidine derivatives	Thiamine phosphates
M265T754	M+	Thiamine	0.484793	0.767322	0.379502	265.111	754.097	29028.4	22761.8	28585	20257.6	22602.8	33471	36992.1	19528.7	40698.7	9318.07	8694.94	5011.94	7345.13	8009.9	8035.67	C00378	HMDB0000235	Extracellular;Membrane (predicted from logP);Mitochondria	Organoheterocyclic compounds	Diazines	Pyrimidines and pyrimidine derivatives	Thiamines
M126T652	(M+H)+	Taurine	0.185228	1.46265	0.386419	126.021	651.804	4485.44	6763.43	7017.09	4319.7	5972.68	8048.48	5335.65	10342.8	5673.29	4394.97	23518.5	4277.88	4647.04	4848.9	4661.84	C00245	HMDB0000251	Extracellular;Peroxisome	Organic acids and derivatives	Organic sulfonic acids and derivatives	Organosulfonic acids and derivatives	Organosulfonic acids
M117T716_2	(M-H)-	Succinate	1.20422	1.07343	0.696188	117.019	715.942	60653.2	87733.1	60659.7	51497.5	61218.3	45037.1	40517.8	65713.1	98744.8	51523.4	87822.2	49410.3	27569.7	27716.4	28874.5	C00042	HMDB0000254	Extracellular;Mitochondria;Endoplasmic reticulum;Peroxisome	Organic acids and derivatives	Carboxylic acids and derivatives	Dicarboxylic acids and derivatives	Dicarboxylic acids and derivatives
M428T356	(M+H)+	Stearoylcarnitine	1.2797	0.476019	0.0928908	428.372	356.298	37735.8	31114.1	50485.1	11161.2	54994.6	35854.6	1312.69	3953.44	53523.4	1807.82	23360.2	21407	821.536	867.25	982.088		HMDB0000848	Cytoplasm;Extracellular;Membrane;Mitochondria;	Lipids and lipid-like molecules	Fatty Acyls	Fatty acid esters	Acyl carnitines
M277T74	(M+H)+	Stearidonic Acid	1.85471	1.14688	0.592668	277.215	74.459	137597	104794	92469.5	23217.5	96911.1	201228	115746	122601	78599.1	130453	105499	199707	86763.3	86763.7	88721.4
M283T1149	(M-H)-	Stearic acid	0.951588	1.1867	0.532738	283.263	1149.04	12517.2	68117.4	18427.7	25946.7	33625.3	33461.1	54426.5	31911.9	47522.1	39826.3	30360.3	23912.4	45798.9	47961.9	56104.3	C01530	HMDB0000827	Cytoplasm;Extracellular;Membrane	Lipids and lipid-like molecules	Fatty Acyls	Fatty acids and conjugates	Long-chain fatty acids
M477T50	(M-2H+3Na)+	Squalene	0.510919	0.282106	0.346558	477.355	50.055	3446.78	4738.22	53636.9	2585.23	2363.95	2927.39	3332.37	5328.08	1460.91	5524.53	2198.89	1817.54	3393.79	3050.6	3037.66	C00751	HMDB0000256	Extracellular;Membrane (predicted from logP);Endoplasmic reticulum	Lipids and lipid-like molecules	Prenol lipids	Triterpenoids	Triterpenoids
M300T153_2	(M+H)+	Sphingosine	0.575945	0.68104	0.0303069	300.289	152.578	31852.9	18923.1	20471.6	19826.1	21618	15959.5	14011.8	11167.9	15578.9	9505.02	18537.4	18815.7	14303.1	14363.5	12078.8	C00319	HMDB0000252	Cytoplasm;Extracellular;Membrane (predicted from logP);Lysosome;Endoplasmic reticulum	Organic nitrogen compounds	Organonitrogen compounds	Amines	1,2-aminoalcohols
M214T724	(M-H)-	sn-Glycerol 3-phosphoethanolamine	3.40149	0.729668	0.25407	214.049	723.834	729048	1.18017e+06	647492	289314	609750	429546	603638	516185	718395	327590	438495	230695	276752	276861	285175	C01233	HMDB0000114	Cytoplasm
M216T784	(M+H)+	sn-Glycerol 3-phosphoethanolamine	2.35907	0.610414	0.0441032	216.062	784.162	208136	269140	159956	106223	149584	116869	121472	106386	148112	73071	112359	55061	68234.6	68234	68609.7	C01233	HMDB0000114	Cytoplasm
M298T152	(M+H)+	S-Methyl-5'-thioadenosine	0.847522	1.24573	0.566294	298.096	152.24	15931.6	89329.1	55788.3	148174	108423	64351.2	120693	221575	107367	53701.8	53905.2	43198.8	84325.7	78351.1	84282.9	C00170	HMDB0001173	Cytoplasm (predicted from logP)	Nucleosides, nucleotides, and analogues	5'-deoxyribonucleosides	5'-deoxy-5'-thionucleosides	5'-deoxy-5'-thionucleosides
M296T182	(M-H)-	S-Methyl-5'-thioadenosine	0.222174	1.00098	0.996057	296.081	182.442	3053.65	4493.11	3098.9	3245.6	2475.76	1450.57	1773.98	4363.5	3937.26	2716.19	2195.4	2848.76	1996.19	2017.48	2060.56	C00170	HMDB0001173	Cytoplasm (predicted from logP)	Nucleosides, nucleotides, and analogues	5'-deoxyribonucleosides	5'-deoxy-5'-thionucleosides	5'-deoxy-5'-thionucleosides
M235T826	(M+H)+	Ser-Glu	0.413451	0.285045	0.142221	235.092	825.673	3509.71	2599.21	1174.69	11485.5	2299.99	695.971	796.325	1097.53	825.699	1070.91	1481.1	932.469	579.371	717.507	719.015
M244T70	(M+CH3CN+H)+	Sebacic acid	0.781273	0.39264	0.366998	244.154	70.095	3280.78	2551.56	33665.1	71361.6	772.334	1558.66	22454.1	3894.93	2108.25	6242.23	1733.66	8009.88	8758.19	22343.8	22357.2	C08277	HMDB0000792	Membrane (predicted from logP)	Lipids and lipid-like molecules	Fatty Acyls	Fatty acids and conjugates	Medium-chain fatty acids
M90T668	(M+H)+	Sarcosine	0.573507	0.631656	0.233969	90.054	667.787	26298.2	4952.48	17359.4	8806.24	10608.5	9533.96	13625.2	4765.38	10614.5	6226.42	12943.5	815.564	10171.4	10189.6	10256.5	C00213	HMDB0000271	Extracellular;Mitochondria;Peroxisome	Organic acids and derivatives	Carboxylic acids and derivatives	Amino acids, peptides, and analogues	Alpha amino acids
M383T713	(M-H)-	S-Adenosyl-L-homocysteine	0.267469	1.06713	0.832355	383.112	712.579	1394.72	6772.45	3577.43	1184.6	2202.36	2248.18	3328.11	2072.52	3552.66	2338.58	3578.92	3675.68	1632.77	1751.38	1630.85	C00021	HMDB0000939	Mitochondria;Nucleus;Endoplasmic reticulum	Nucleosides, nucleotides, and analogues	5'-deoxyribonucleosides	5'-deoxy-5'-thionucleosides	5'-deoxy-5'-thionucleosides
M257T256	(M-H)-	Ribothymidine	0.160635	0.724837	0.129469	257.077	255.746	3970.42	2701.67	2135.53	2168.67	3086.17	1477.01	1899.57	1626.5	2561.7	881.107	2395.64	1899.05	1010.42	921.698	1009.98		HMDB0000884	Cytoplasm;	Nucleosides, nucleotides, and analogues	Pyrimidine nucleosides		Pyrimidine nucleosides
M375T380	(M-H)-	Riboflavin	0.0472374	0.856088	0.462599	375.129	380.264	2135.26	847.133	1064.05	1027.53	1272.52	894.851	666.876	999.16	1499.25	952.475	888.485	1192.98	803.114	803.932	839.154	C00255	HMDB0000244	Extracellular	Organoheterocyclic compounds	Pteridines and derivatives	Alloxazines and isoalloxazines	Flavins
M377T432	(M+H)+	Riboflavin	0.399475	0.641525	0.113919	377.145	432.173	15701.1	12069.1	6592.32	4761.14	8542.77	5975.53	5545.08	5697.48	8806.69	3809.3	4361.62	6192.51	2560.75	2508.51	2838.71	C00255	HMDB0000244	Extracellular	Organoheterocyclic compounds	Pteridines and derivatives	Alloxazines and isoalloxazines	Flavins
M345T72	(M+CH3COO+2H)+	Retinene	1.62459	0.577314	0.0157934	345.242	71.795	91113.4	82905.8	126429	48880.5	101384	81501.9	78181.6	39928.1	56812.3	35619.4	65717.3	30995.9	36116.4	35775.2	35278.8	C00376	HMDB0001358	Cytoplasm;Extracellular;Membrane (predicted from logP)	Lipids and lipid-like molecules	Prenol lipids	Retinoids	Retinoids
M503T797	(M-H)-	Raffinose	0.333702	1.38474	0.270592	503.161	796.844	1982.94	1403.21	1681.17	1671.35	2174.53	1154.98	3114.18	2718.31	1935.81	809.004	1097.49	4267.02	674.797	743.453	741.378	C00492	HMDB0003213	Cytoplasm (predicted from logP)	Organic oxygen compounds	Organooxygen compounds	Carbohydrates and carbohydrate conjugates	Oligosaccharides
M522T902	(M+NH4)+	Raffinose	0.311309	1.17109	0.474281	522.201	901.65	1812.91	2463.99	2180.31	2800.72	2315.59	5236.07	3564.96	2749.04	4071.75	3632.09	1546.3	4121.35	2178.68	2158.78	2158.86	C00492	HMDB0003213	Cytoplasm (predicted from logP)	Organic oxygen compounds	Organooxygen compounds	Carbohydrates and carbohydrate conjugates	Oligosaccharides
M109T918	(M+H)+	Quinone	0.229406	0.745124	0.276949	109.027	917.554	4028.43	4325.72	3635.22	502.79	2700.68	2681.94	2380.68	1734.46	3194.58	1823.93	3102.01	1083.27	1075.11	1080.6	1289.11	C00472/C15602	HMDB0003364	Cellular Locations Not Available	Organic oxygen compounds	Organooxygen compounds	Carbonyl compounds	P-benzoquinones
M159T828	(M-H2O-H)-	Pyrophosphate	0.862195	1.02925	0.900468	158.925	828.04	20365.1	46523	28900.6	6494.87	32991.9	24307.6	26815.7	32888.1	35717.2	20697.1	19321.5	28811.1	16898.9	18195.4	18120.1
M285T813	(M+K-2H)-	Pyridoxamine 5'-phosphate	0.112677	0.815761	0.362717	285	813.166	1738.15	2744.82	4231.24	3020.96	4136.85	3682.96	2881.71	2646.19	4447.52	1542.22	3330.07	1104.47	3440.42	3638.12	4748.49	C00647	HMDB0001555	Mitochondria	Organoheterocyclic compounds	Pyridines and derivatives	Pyridoxamines	Pyridoxamine 5'-phosphates
M168T195	(M+H)+	Pyridoxal (Vitamin B6)	0.631612	0.679226	0.306012	168.065	195.344	53442	34456.9	11852.9	22140.9	8727.56	21120.3	14912.3	14932.8	31128.3	5741.15	17921.3	18430.1	11062.6	11062.5	7774.41	C00250	HMDB0001545	Cytoplasm;Extracellular	Organoheterocyclic compounds	Pyridines and derivatives	Pyridine carboxaldehydes	Pyridoxals and derivatives
M119T212	(M-H)-	Purine	0.170065	0.846602	0.265603	119.035	211.953	13158.1	12792.6	11097.6	7580.74	9455.64	8377.43	7045.45	5167.46	11318	9645.21	8684.46	11019.9	4947.31	4927.41	5352.55	C15587	HMDB0001366	Cytoplasm (predicted from logP)	Organoheterocyclic compounds	Imidazopyrimidines	Purines and purine derivatives	Purines and purine derivatives
M121T224	(M+H)+	Purine	0.366424	0.455934	0.0779465	121.049	223.8	5570.71	7109.53	3154.02	1859.19	1820.78	1910.4	776.511	1716.5	1363.81	1263.37	3326.78	1321.25	1576.91	1622.45	1572.46	C15587	HMDB0001366	Cytoplasm (predicted from logP)	Organoheterocyclic compounds	Imidazopyrimidines	Purines and purine derivatives	Purines and purine derivatives
M243T435	(M-H)-	Pseudouridine	0.922708	0.500602	0.142012	243.062	435.261	32585.2	12524.7	9312.61	42480.7	19939.1	6626.47	6741.98	7568.21	23524.1	5600.14	6305.23	12068.9	2928.02	3204.53	2932.78	C02067	HMDB0000767	Cytoplasm (predicted from logP)	Nucleosides, nucleotides, and analogues	Nucleoside and nucleotide analogues		Nucleoside and nucleotide analogues
M353T433	(M+H)+	Prostaglandin I2	0.696324	1.04398	0.92293	353.232	432.805	50905	39113.7	25667.1	3391.86	25421.2	55552.7	29078.8	768.903	31289.4	23440.2	31527	92746	13146.3	13149.5	13305	C01312	HMDB0001335	Extracellular;Membrane (predicted from logP);Endoplasmic reticulum	Lipids and lipid-like molecules	Fatty Acyls	Eicosanoids	Prostaglandins and related compounds
M351T80	(M-H)-	Prostaglandin H2	2.62482	0.39594	0.106238	351.217	79.895	280579	224257	56051.6	13710.1	49252.5	202293	47647.1	25135	107751	42144.7	52302.9	52122.5	28464.1	30247.8	30260.8	C00427	HMDB0001381	Cytoplasm;Extracellular;Membrane;Endoplasmic reticulum	Lipids and lipid-like molecules	Fatty Acyls	Eicosanoids	Prostaglandins and related compounds
M351T232	(M-H)-	Prostaglandin E2	2.32952	0.674918	0.463217	351.217	231.82	303117	110178	104827	32459.8	135053	632004	103072	72559.8	198452	118974	164166	232075	65007.9	67221.4	67214.2	C00584	HMDB0001220	Cytoplasm;Extracellular;Membrane;Endoplasmic reticulum	Lipids and lipid-like molecules	Fatty Acyls	Eicosanoids	Prostaglandins and related compounds
M351T179	(M-H)-	Prostaglandin D2(PGD2)	2.71202	0.73169	0.443738	351.216	179.498	176006	23250.5	557140	352694	360714	738318	197124	189935	555833	168266	367826	136677	89216	92730.8	88365.5
M370T238	(M+NH4)+	Prostaglandin D2(PGD2)	1.71712	0.339203	0.00190605	370.258	238.423	75570.6	42303.2	52774	23581.7	42727.1	62550.3	17950.8	12746.9	27508.6	10599.2	22453.5	10334.6	8892.31	7764.91	8876.73
M335T226	(M-H2O-H)-	Prostaglandin D1	0.866986	0.582385	0.311106	335.221	225.633	16527.4	13732.5	12448.9	3929.57	13167.9	54598.1	12533.1	6875.28	17196.8	8576.11	9636.88	11809.3	5409.11	5651.57	5650.79	C06438	HMDB0005102	Extracellular;Membrane	Lipids and lipid-like molecules	Fatty Acyls	Eicosanoids	Prostaglandins and related compounds
M335T182	(M-H)-	Prostaglandin B1	2.11184	0.699395	0.588166	335.221	182.35	29815.8	20712.6	87602.3	24130.3	88303.6	363244	80417.5	34448	112232	46132.2	66144.4	89920.6	16019.9	16011.6	16733.5	C00959	HMDB0002982	Extracellular;Membrane (predicted from logP)	Lipids and lipid-like molecules	Fatty Acyls	Eicosanoids	Prostaglandins and related compounds
M245T603	(M+H-H2O)+	Pro-Phe	0.111086	0.862251	0.599682	245.124	603.284	1689.66	3908.77	1463.4	1507.11	1171.93	1279.88	1534.37	1548.84	1230.11	1994.15	2277.62	917.551	1853.35	1877.18	1129.54
M187T664	(M+H)+	Pro-Ala	0.0438914	0.942736	0.829359	187.107	664.202	3044.89	846.758	1536.01	1398	832.818	1299.87	1088.43	989.735	1398.19	1427.03	2331.94	1210.04	1444.04	1444.04	1445.47
M311T70_2	(M-H)-	Phytanic acid	0.581074	0.986428	0.971897	311.294	70.179	8365.88	7306.22	7107.97	25590	5933.87	6289.67	7330.99	8435.14	7407.52	14723.3	3864.16	18010.1	9968.88	9623.02	10256	C01607	HMDB0000801	Cytoplasm;Extracellular;Membrane;Peroxisome	Lipids and lipid-like molecules	Prenol lipids	Diterpenoids	Acyclic diterpenoids
M354T54	(M+CH3CN+H)+	Phytanic acid	0.162306	0.893603	0.64753	354.336	54.244	57581.6	60197.9	30106	42228.1	37782.8	27080.5	5024.59	58845.8	43626.7	38400.8	51818.6	30131.6	38420.8	37666.9	38177.6	C01607	HMDB0000801	Cytoplasm;Extracellular;Membrane;Peroxisome	Lipids and lipid-like molecules	Prenol lipids	Diterpenoids	Acyclic diterpenoids
M279T49	(M+H)+	Phthalic acid Mono-2-ethylhexyl Ester	1.07586	0.6033	0.0689581	279.158	49.448	179535	115716	64376.5	93842.3	62711.2	189768	64870.7	61735.5	78055.2	81196.7	67830.1	72211	71372.9	66882.9	66670.5
M177T896	(M+Na-2H)-	Phosphoglycolic acid	0.225718	1.20577	0.276407	177.003	895.582	1640.2	1102.85	1247.22	472.655	1416.35	1386.83	1999.55	1509.89	1217.41	1592.38	1451.15	990.892	1529.76	1695.48	1691.16	C00988	HMDB0000816	Cytoplasm (predicted from logP)	Organic acids and derivatives	Organic phosphoric acids and derivatives	Phosphate esters	Monoalkyl phosphates
M169T907	(M+H)+	Phosphoenolpyruvate	0.404296	0.710973	0.0878202	168.989	907.43	13004.4	27163.6	23483.7	9920.43	21509.7	19754.7	17492.4	14684.3	15248	12342.5	13161.5	8716.98	12656.8	12727.6	12776.9	C00074	HMDB0000263	Cytoplasm;Mitochondria	Organic acids and derivatives	Organic phosphoric acids and derivatives	Phosphate esters	Phosphate esters
M335T847	(2M-H)-	Phosphoenolpyruvate	2.11931	0.670431	0.0843595	334.957	846.763	154345	346616	239092	122874	266353	197434	199705	146446	199149	121217	142536	80417.6	116918	119801	121269	C00074	HMDB0000263	Cytoplasm;Mitochondria	Organic acids and derivatives	Organic phosphoric acids and derivatives	Phosphate esters	Phosphate esters
M335T847	(2M-H)-	Phosphoenolpyruvate	2.11931	0.670431	0.0843595	334.957	846.763	154345	346616	239092	122874	266353	197434	199705	146446	199149	121217	142536	80417.6	116918	119801	121269	C00074	HMDB0000263	Cytoplasm;Mitochondria	Organic acids and derivatives	Organic phosphoric acids and derivatives	Phosphate esters	Phosphate esters
M194T397	(M+H)+	Phenylacetylglycine	1.77734	0.234713	0.101204	194.081	397.056	81122.4	15443.8	15072	154808	54619.1	8677.7	8733.06	15241.6	26894.5	2960.16	8884	14681.7	1028.97	1026.84	957.473	C05598	HMDB0000821	Cellular Locations Not Available	Organic acids and derivatives	Carboxylic acids and derivatives	Amino acids, peptides, and analogues	N-acyl-alpha amino acids
M192T349	(M-H)-	Phenylacetylglycine	3.16217	0.192144	0.0849542	192.066	349.097	136303	33874.2	26466.2	302154	126443	13841.3	15962.1	18346.5	45796	3922.4	19190	19578.7	5448.67	5680.8	5678.86	C05598	HMDB0000821	Cellular Locations Not Available	Organic acids and derivatives	Carboxylic acids and derivatives	Amino acids, peptides, and analogues	N-acyl-alpha amino acids
M192T349	(M-H)-	Phenylacetylglycine	3.16217	0.192144	0.0849542	192.066	349.097	136303	33874.2	26466.2	302154	126443	13841.3	15962.1	18346.5	45796	3922.4	19190	19578.7	5448.67	5680.8	5678.86	C05598	HMDB0000821	Cellular Locations Not Available	Organic acids and derivatives	Carboxylic acids and derivatives	Amino acids, peptides, and analogues	N-acyl-alpha amino acids
M93T231	(M-H)-	Phenol	2.06177	0.567549	0.0781205	93.034	230.514	148647	175027	104340	59859.5	80534.4	58317.4	86231.6	65692.9	94540.3	35079.6	55644.3	18509	32428	32797.5	32440.4	C00146/C15584	HMDB0000228	Cellular Locations Not Available	Benzenoids	Phenols	1-hydroxy-4-unsubstituted benzenoids	1-hydroxy-4-unsubstituted benzenoids
M93T231	(M-H)-	Phenol	2.06177	0.567549	0.0781205	93.034	230.514	148647	175027	104340	59859.5	80534.4	58317.4	86231.6	65692.9	94540.3	35079.6	55644.3	18509	32428	32797.5	32440.4	C00146/C15584	HMDB0000228	Cellular Locations Not Available	Benzenoids	Phenols	1-hydroxy-4-unsubstituted benzenoids	1-hydroxy-4-unsubstituted benzenoids
M223T473	(M+H)+	Phe-Gly	0.320468	0.44977	0.05314	223.106	472.792	3160.85	1959.65	3078.69	6573.01	2273.55	1290.69	1298.46	1343.03	1395.66	1845.65	1045.81	1318.57	939.427	1415.31	1417.93
M703T205	(2M-H)-	PGF3a	0.503289	0.495985	0.585995	703.44	204.567	235.114	57.91	793.921	106.038	811.552	17593.9	515.326	358.936	1177.88	1355.05	2141.32	4172	262.114	261.521	290.201
M349T180	(M-H)-	PGE3	0.372085	0.776764	0.376803	349.201	180.118	60310.5	19532.6	34130.3	14918.4	31799.2	42351.2	15685.9	20864.1	35779.5	16546.9	44476.2	24363.3	8337.7	10512.6	10509.7
M370T185	(M+NH4)+	PGD2	1.36345	0.506197	0.246735	370.258	184.731	9632.36	8761.98	97114.3	43022	109198	189060	83653.8	18211.6	53044.7	39706	28001.2	8607.72	17453	17598.2	13400.7
M305T93	(2M+H)+	Perillyl alcohol	0.257162	0.812786	0.423189	305.246	92.534	14931.5	10567.5	9711.46	2056.85	6669.79	6994.73	8154.6	6113.9	8641.49	6539.04	4057.01	7890.63	4345.98	4346.25	4239.56
M333T236	(M-H)-	Penicillin G	5.78581	0.0142432	0.285148	333.09	235.501	1972.98	3145.45	8678.75	1.28181e+06	140951	3755.66	8274.64	4136.65	3035.65	2199.79	2383.3	484.601	2415.8	2489.21	2490.07
M157T80	(M-H)-	Pelargonic acid	1.16177	1.11394	0.248009	157.123	79.895	28108.5	29103.3	37899.4	38177.8	41552.9	23420.8	37279.5	34645	38343.2	35473.2	40522.5	34589.7	39611.5	43595.7	43590.6	C01601	HMDB0000847	Extracellular;Membrane	Lipids and lipid-like molecules	Fatty Acyls	Fatty acids and conjugates	Medium-chain fatty acids
M109T63	(M+H)+	para-Phenylenediamine	0.329521	1.16989	0.386714	109.075	63.466	5717.81	3034.59	2229.82	2921.63	3398.08	2977.46	3944.43	4891.72	3476.88	5327.74	3304.69	2779.28	2851.33	2494.56	2815.49
M218T497	(M-H)-	Pantothenate	0.723773	0.947937	0.862916	218.103	497.354	70275.9	56914.4	18352.9	23184.7	27026.2	24479.2	21011	35531.3	32350.1	29550.3	25753.5	64570.8	13532.1	14432.2	14403.5	C00864	HMDB0000210	Extracellular;Mitochondria	Organic oxygen compounds	Organooxygen compounds	Alcohols and polyols	Secondary alcohols
M300T57	(M+H)+	Palmitoyl ethanolamide	0.518659	1.22936	0.604699	300.289	56.558	51100	10169.9	11043.5	15153.5	17558.7	20065.2	12492.2	12091	16579.9	21858.8	45109.4	45650.9	15331	14711.2	14722.8
M255T91	(M-H)-	Palmitic acid	3.59317	0.544126	0.0951813	255.232	91.148	921594	563680	279306	284773	303146	269063	231682	184992	257967	266995	268570	216255	256282	248105	256186	C00249	HMDB0000220	Cytoplasm;Extracellular;Membrane (predicted from logP);Endoplasmic reticulum;Peroxisome	Lipids and lipid-like molecules	Fatty Acyls	Fatty acids and conjugates	Long-chain fatty acids
M255T91	(M-H)-	Palmitic acid	3.59317	0.544126	0.0951813	255.232	91.148	921594	563680	279306	284773	303146	269063	231682	184992	257967	266995	268570	216255	256282	248105	256186	C00249	HMDB0000220	Cytoplasm;Extracellular;Membrane (predicted from logP);Endoplasmic reticulum;Peroxisome	Lipids and lipid-like molecules	Fatty Acyls	Fatty acids and conjugates	Long-chain fatty acids
M157T470	(M+H)+	Orotate	0.389625	0.693262	0.121381	157.023	470.217	7302.05	8216.11	6338.14	2774.18	5799.85	5846.53	5591.23	4568.55	6035.31	2854.17	5164.21	935.893	3145.55	2958.76	2969.68	C00295	HMDB0000226	Cytoplasm (predicted from logP)	Organoheterocyclic compounds	Diazines	Pyrimidines and pyrimidine derivatives	Pyrimidinecarboxylic acids
M155T470	(M-H)-	Orotate	1.18795	0.611523	0.0290861	155.009	470.272	36423	75015.6	51576.7	44090.7	40230.1	48863.5	29750.4	45296.6	43579.6	26820.4	22144.2	13541.9	22274.7	20863.8	22248.6	C00295	HMDB0000226	Cytoplasm (predicted from logP)	Organoheterocyclic compounds	Diazines	Pyrimidines and pyrimidine derivatives	Pyrimidinecarboxylic acids
M155T470	(M-H)-	Orotate	1.18795	0.611523	0.0290861	155.009	470.272	36423	75015.6	51576.7	44090.7	40230.1	48863.5	29750.4	45296.6	43579.6	26820.4	22144.2	13541.9	22274.7	20863.8	22248.6	C00295	HMDB0000226	Cytoplasm (predicted from logP)	Organoheterocyclic compounds	Diazines	Pyrimidines and pyrimidine derivatives	Pyrimidinecarboxylic acids
M258T870	(M+CH3COO)-	O-Phospho-L-homoserine	0.241684	0.701535	0.194491	258.038	869.853	5401.45	4802.11	8109.23	2268.9	7529.54	5368.85	6154.84	2056.18	3891.41	1978.75	6667.61	2738.67	1718.66	1818.85	1727.69	C01102	HMDB0003484	Cellular Locations Not Available	Organic acids and derivatives	Carboxylic acids and derivatives	Amino acids, peptides, and analogues	L-alpha-amino acids
M142T908	(M+H)+	O-Phosphoethanolamine	1.00057	0.9999	0.999622	142.025	908.178	73507.7	109476	68399.6	17959.3	55658.6	55119.5	65421.8	70100.5	79859.8	47465.9	59012.4	58222.2	34848.5	34657.9	34659.8	C00346	HMDB0000224	Cytoplasm;Endoplasmic reticulum	Organic acids and derivatives	Organic phosphoric acids and derivatives	Phosphate esters	Phosphoethanolamines
M140T845	(M-H)-	O-Phosphoethanolamine	1.1173	0.911649	0.726288	140.011	845.178	72645.5	117404	62512.4	17528.9	49606.1	39533.8	57327	58612.2	74549.9	41867.4	47225.6	47910.1	27694.9	27722.3	28973.5	C00346	HMDB0000224	Cytoplasm;Endoplasmic reticulum	Organic acids and derivatives	Organic phosphoric acids and derivatives	Phosphate esters	Phosphoethanolamines
M281T180	(M-H)-	Oleic acid	1.55302	0.53066	0.0398866	281.248	179.723	78026.3	78589.8	61411.8	39119.5	48174.2	32447.1	41750.6	21475.3	63759.5	17809.2	19015.7	15430	19271	17160	17062.1	C00712	HMDB0000207	Extracellular;Membrane (predicted from logP)	Lipids and lipid-like molecules	Fatty Acyls	Fatty acids and conjugates	Long-chain fatty acids
M281T180	(M-H)-	Oleic acid	1.55302	0.53066	0.0398866	281.248	179.723	78026.3	78589.8	61411.8	39119.5	48174.2	32447.1	41750.6	21475.3	63759.5	17809.2	19015.7	15430	19271	17160	17062.1	C00712	HMDB0000207	Extracellular;Membrane (predicted from logP)	Lipids and lipid-like molecules	Fatty Acyls	Fatty acids and conjugates	Long-chain fatty acids
M339T1208	(M-H)-	Norethindrone Acetate	1.03104	0.951156	0.782105	339.199	1207.98	78537.1	67914.6	61456.2	21124.5	61503.4	57072.5	59370.2	64996.9	29035.2	71396.6	52884.4	52946.4	42844.5	57194.4	59513.7
M297T76_2	(M-H)-	Nname,cis-9,10-Epoxystearic acid	2.45309	1.13623	0.441514	297.242	76.168	145184	166717	111654	39275.4	171496	156995	162868	161948	123805	168490	118592	163420	117672	117952	122858
M355T811	(M+Na-2H)-	Nicotinamide ribotide	0.329692	0.97675	0.860616	355.039	810.651	8594.89	15041.2	13371.2	12317.9	7889.45	9658.13	13019.7	12380.2	11378.3	8589.49	11881.7	8068.57	11096.9	11095.4	11448.7	C00455	HMDB0000229	Cytoplasm;Mitochondria;Nucleus	Nucleosides, nucleotides, and analogues	Pyridine nucleotides	Nicotinamide nucleotides	Nicotinamide nucleotides
M139T305	(M+H)+	Nicotinamide N-oxide	0.700522	0.560735	0.25208	139.049	304.509	45961.5	15491	9162.19	25799.4	12648.7	4074.75	7258.43	12470.5	23635.5	3303.07	8659.85	8112.79	3392.97	3319.28	3389.94		HMDB0002730	Cellular Locations Not Available	Organoheterocyclic compounds	Pyridines and derivatives	Pyridinecarboxylic acids and derivatives	Nicotinamides
M123T170	(M+H)+	Nicotinamide	2.62287	0.589339	0.0803618	123.054	169.717	483946	730319	443023	180327	405655	402056	321929	326038	450725	245172	29070.2	186059	242286	230604	231525	C00153	HMDB0001406	Extracellular	Organoheterocyclic compounds	Pyridines and derivatives	Pyridinecarboxylic acids and derivatives	Nicotinamides
M203T1039	(M+H)+	NG,NG-dimethyl-L-arginine(ADMA)	3.52477	0.563858	0.250605	203.15	1039.45	812385	788130	463787	279985	77869.1	140455	70963.5	107421	488993	30529.2	429564	317479	90408.3	120502	122374	C03626	HMDB0001539	Cytoplasm (predicted from logP)	Organic acids and derivatives	Carboxylic acids and derivatives	Amino acids, peptides, and analogues	Arginine and derivatives
M365T67	(M-H)-	Nervonic acid	0.138307	0.846329	0.273629	365.342	66.582	8936.48	7742.61	6883.93	8602.49	5160.25	5978.84	4302.65	5530.75	7813.6	7397.31	3787.11	7818.49	7285.23	7286.03	7461.24	C08323	HMDB0002368	Cytoplasm;Extracellular;Membrane (predicted from logP)	Lipids and lipid-like molecules	Fatty Acyls	Fatty acids and conjugates	Very long-chain fatty acids
M175T771	(M-H)-	N-carbamoyl-L-aspartate	0.866895	0.897504	0.693544	175.036	770.642	86871.8	131559	102762	36837.7	92526.8	77686.3	99689.4	80605.2	148155	55180.3	76253.5	14217.7	39056.8	41099.3	41095.4	C00438	HMDB0000828	Cytoplasm	Organic acids and derivatives	Carboxylic acids and derivatives	Amino acids, peptides, and analogues	Aspartic acid and derivatives
M177T830	(M+H)+	N-carbamoyl-L-aspartate	0.341119	0.886093	0.589954	177.05	830.495	13392.9	19441.6	15471.5	8627.69	15064.6	13002.9	16237.2	14079.2	21509.3	9223.27	10538.4	3731.62	6538.49	6538	6775.21	C00438	HMDB0000828	Cytoplasm	Organic acids and derivatives	Carboxylic acids and derivatives	Amino acids, peptides, and analogues	Aspartic acid and derivatives
M308T689	(M-H)-	N-Acetylneuraminic acid	0.373977	0.792639	0.445249	308.097	688.534	20029	11182.1	7011.07	5862.51	7319.22	5644.05	7996.47	4970.13	12067.3	5745.31	7988.31	6450.94	2442.66	2447.45	2293.43	C00270	HMDB0000230	Cytoplasm;Membrane;Nucleus;Lysosome;	Organic oxygen compounds	Organooxygen compounds	Carbohydrates and carbohydrate conjugates	N-acylneuraminic acids
M222T518	(M+H)+	N-Acetylmannosamine	0.298515	0.57429	0.157627	222.096	518.163	5606.43	9814.84	2131.45	3546.88	2264.31	3666.02	2474.75	1769.56	4631.67	2591.81	2271.96	1783.28	1244.73	1379.53	1380.03	C00645	HMDB0001129	Cytoplasm (predicted from logP)	Organic oxygen compounds	Organooxygen compounds	Carbohydrates and carbohydrate conjugates	Acylaminosugars
M220T517	(M-H)-	N-Acetylmannosamine	0.215071	0.418989	0.191894	220.082	516.796	834.348	4759.7	771.376	964.23	1769.89	514.589	386.94	931.441	942.751	347.802	513.192	906.094	256.832	240.249	240.763	C00645	HMDB0001129	Cytoplasm (predicted from logP)	Organic oxygen compounds	Organooxygen compounds	Carbohydrates and carbohydrate conjugates	Acylaminosugars
M228T886	(M+K)+	N-Acetyl-L-glutamic acid	0.0116762	0.867866	0.480189	228.026	886.144	1844.52	2970.36	2808.99	1079.96	2771	4001.4	3215.54	1779.03	2438.63	1841.75	2157.36	1998.97	1973.83	2036.13	2047.27	C00624	HMDB0001138	Mitochondria	Organic acids and derivatives	Carboxylic acids and derivatives	Amino acids, peptides, and analogues	Glutamic acid and derivatives
M188T715	(M-H)-	N-Acetyl-L-glutamate	0.295305	0.463856	0.0709933	188.055	715.033	5702.55	1643.79	2355.32	5003.16	3612.33	858.271	1443.18	854.723	1323.64	1456	790.385	3026.7	1008.25	1011.5	1052.68	C00624	HMDB0001138	Mitochondria	Organic acids and derivatives	Carboxylic acids and derivatives	Amino acids, peptides, and analogues	Glutamic acid and derivatives
M174T727	(M-H)-	N-Acetyl-L-aspartic acid	1.03236	0.545447	0.192347	174.041	727.181	64735.2	41717.4	17714	15665.1	17284.3	11450.8	12151.2	10200.4	28391.8	8406.84	21957.4	10836.6	6503.75	6503.97	6452.73	C01042	HMDB0000812	Cytoplasm;Mitochondria	Organic acids and derivatives	Carboxylic acids and derivatives	Amino acids, peptides, and analogues	Aspartic acid and derivatives
M130T468	(M-H)-	N-Acetyl-L-alanine	0.281846	0.742884	0.278762	130.05	468.168	9089.27	7197.61	4538.08	1508.45	3531.99	5000.74	4342.49	2979.46	5365.38	3188.67	3739.73	3314.24	1840.15	1837.62	1902.19		HMDB0000766	Cytoplasm (predicted from logP);	Organic acids and derivatives	Carboxylic acids and derivatives	Amino acids, peptides, and analogues	N-acyl-L-alpha-amino acids
M380T808	(M-H+2Na)+	N-Acetylglucosaminylasparagine	0.107118	0.689831	0.13471	380.108	808.066	1651.8	1242.31	816.853	529.27	677.535	677.64	672.297	555.889	647.551	757.597	663.645	562.904	733.099	761.683	732.548
M300T825	(M-H)-	N-Acetylglucosamine 1-phosphate	0.974057	1.02582	0.926456	300.048	825.222	57653.3	76010.9	60734	18877.2	42647.7	51636.1	24323.7	90762	85663.9	34680.4	42691.2	37380	16855.9	16875.8	17554	C04256	HMDB0001367	Cytoplasm	Organic oxygen compounds	Organooxygen compounds	Carbohydrates and carbohydrate conjugates	N-acyl-alpha-hexosamines
M190T363_2	(M-H)-	N-Acetyl-DL-methionine	0.183495	0.76673	0.0270827	190.054	362.897	10529.7	11043.4	10309.6	8633.43	10575.2	7893.77	7382.97	8302.77	7370.97	5124.81	10425.5	6618.62	6897.33	7072.62	7065.03
M366T869	(M+H-H2O)+	N-Acetyl-D-lactosamine	0.458325	0.489601	0.0156663	366.139	869.128	6730.63	8116.11	4732.1	4352.03	3158.35	3097.04	1847.97	2527.27	2652.77	1970.05	3936.98	1844.16	2319.62	2255.3	2253.89
M204T518	(M+H-H2O)+	N-Acetyl-D-glucosamine	0.74852	0.516056	0.0557359	204.086	518.037	25794	25220.6	10757.9	7803.31	11537.4	10944.7	6670.28	10368.8	11182	4880.8	8971.36	5433.84	3986.92	3989.35	4227.97	C00140	HMDB0000215	Cytoplasm;Membrane;Lysosome	Organic oxygen compounds	Organooxygen compounds	Carbohydrates and carbohydrate conjugates	Acylaminosugars
M220T473	(M-H)-	N-Acetyl-D-glucosamine	0.489454	0.504695	0.0247692	220.082	473.264	6427.59	7006.64	3052.75	2341	6341.58	7495.28	1969.35	2142.66	5024.57	1622.64	3086.73	2639.83	1197.57	1143.33	1197.93	C00140	HMDB0000215	Cytoplasm;Membrane;Lysosome	Organic oxygen compounds	Organooxygen compounds	Carbohydrates and carbohydrate conjugates	Acylaminosugars
M303T823	(M-H)-	N-Acetylaspartylglutamate (NAAG)	0.326123	1.40231	0.0814975	303.082	823.331	1237.84	1615.12	1081.17	856.194	1209.19	1624.42	1274.32	1067.19	2125.8	1896.92	1693.22	2633.7	1187.84	1233.43	1190.17	C12270	HMDB0001067	Cellular Locations Not Available	Organic acids and derivatives	Carboxylic acids and derivatives	Amino acids, peptides, and analogues	Dipeptides
M282T264	(M+H)+	N6-methyladenosine	1.0874	0.432708	0.000113531	282.119	264.093	18491.3	31381	26035.6	24404.3	23821.7	18462.6	12467.3	5979.91	10454.3	11083.4	11793.7	9924.04	7005	9296.3	7002.83		HMDB0004044	Cellular Locations Not Available	Nucleosides, nucleotides, and analogues	Purine nucleosides		Purine nucleosides
M189T1079	(M+H)+	N6,N6,N6-Trimethyl-L-lysine	0.494843	0.816841	0.80537	189.159	1079.17	54554	11983	3112.68	12815.4	4205.06	4889.95	4083.99	3622.36	50306.6	5118.89	5897.83	5760.42	5652.95	4631.96	4556.18	C03793	HMDB0001325	Cytoplasm;Endoplasmic reticulum	Organic acids and derivatives	Carboxylic acids and derivatives	Amino acids, peptides, and analogues	L-alpha-amino acids
M286T327	(M+H)+	N4-Acetylcytidine	0.311201	0.696142	0.324793	286.102	326.833	4795.14	3693.06	2719.94	10277.1	6463.23	2183.52	2869.31	2764.36	7537.07	2256.84	2306.53	3242.03	1133	1167.76	1168.73		HMDB0005923	Cellular Locations Not Available	Nucleosides, nucleotides, and analogues	Pyrimidine nucleosides		Pyrimidine nucleosides
M312T388	(M+H)+	N2,N2-Dimethylguanosine	0.618849	0.416138	0.00551026	312.128	388.161	8927.75	4302.97	3815.22	9033.68	6622.1	9406.99	2808.83	1103.49	5001.56	1966.88	3823.38	2818.89	1678.29	1663.23	1467.47		HMDB0004824	Cellular Locations Not Available	Nucleosides, nucleotides, and analogues	Purine nucleosides		Purine nucleosides
M407T902	(M+H-H2O)+	N,N'-Diacetylchitobiose	0.10173	0.730878	0.151094	407.165	901.856	1064.16	1893.98	1368.37	902.896	2095.21	841.345	1189.99	854.721	1379.99	867.086	874.957	801.568	822.645	833.378	822.702	C01674	HMDB0003556/HMDB0062702	Cytoplasm (predicted from logP)	Organic oxygen compounds	Organooxygen compounds	Carbohydrates and carbohydrate conjugates	Acylaminosugars
M232T882	(M+CH3CN+H)+	N-(omega)-Hydroxyarginine	0.361158	0.356818	0.382455	232.139	882.209	859.838	668.64	991.661	12906.8	1179.38	572.128	723.497	1261.93	1355.06	1344.37	540.174	904.544	817.631	950.359	820.205	C05933	HMDB0004224	Cellular Locations Not Available	Organic acids and derivatives	Carboxylic acids and derivatives	Amino acids, peptides, and analogues	Arginine and derivatives
M225T76	(M-H)-	Myristoleic acid	1.68945	1.24938	0.222767	225.185	76.045	39938.9	46456.2	113563	54919.9	77707.5	66727.6	102887	79129.7	103256	65833.4	77554.8	70234	56724.8	58416.7	58595.6	C08322	HMDB0002000	Extracellular;Membrane (predicted from logP)	Lipids and lipid-like molecules	Fatty Acyls	Fatty acids and conjugates	Long-chain fatty acids
M179T727	(M-H)-	myo-Inositol	2.09347	0.956964	0.827392	179.056	726.683	325307	470377	242885	160386	230529	224094	255424	286239	384066	182004	208483	266199	144508	144566	146247	C00137	HMDB0000211	Extracellular
M310T445	(M+CH3COO)-	Muramic acid	0.183012	0.553419	0.218632	310.113	445.108	2913.06	442.17	1051.09	1049.92	1162.41	541.748	1044.64	252.609	440.699	503.721	1355.77	365.255	484.408	498.78	484.359
M337T49	(M+H-H2O)+	MG(18:2(9Z,12Z)/0:0/0:0)[rac]	2.09178	1.28401	0.206953	337.273	48.6355	99049.7	134800	79300.5	38750.8	89983.3	87406.4	77413.3	117676	109016	175126	104182	96198.7	124275	130172	124258
M219T916_1	(M-2H+3Na)+	Methyl 4-hydroxybenzoate	0.373707	0.683487	0.140883	219.005	915.629	7624.58	8947.91	7050.85	2744.09	5407.17	4572.77	3675.56	2658.17	6852.05	2120.5	6012.16	3524.53	2248.39	2249.31	2310.07
M522T854	(M+NH4)+	Maltotriose	0.0839742	0.911504	0.742236	522.201	853.666	780	1662.29	932.379	1213.74	901.917	672.735	551.149	932.07	856.514	488.436	785.417	2004.07	456.872	468.684	457.175	C01835	HMDB0001262	Cytoplasm;Extracellular;Lysosome	Organic oxygen compounds	Organooxygen compounds	Carbohydrates and carbohydrate conjugates	Oligosaccharides
M846T1022	(M+NH4)+	Maltopentaose	0.0643394	0.799025	0.134703	846.306	1022.18	491.939	607.601	743.002	450.636	518.457	775.304	355.715	544.165	649.177	349.07	427.679	540.248	257.389	263.004	257.433		HMDB0012254	Cellular Locations Not Available	Organic oxygen compounds	Organooxygen compounds	Carbohydrates and carbohydrate conjugates	Oligosaccharides
M325T760	(M-H2O-H)-	Maltitol	0.488125	0.563778	0.0823999	325.113	760.492	9323.78	11579	8878.16	4330.61	4034.14	3372.46	4525.06	5644.38	4873.88	1653.25	4839.05	1871.37	2520.97	2878.24	2886.65
M115T742	(M-H)-	Maleic acid	0.991714	0.675408	0.182759	115.003	742.132	77322	70420.2	38103.7	18474.6	39786	28606	33239.9	23606	48014.1	21495.7	29830.8	28005.8	14563.1	14154.2	14558.9	C01384	HMDB0000176	Cytoplasm;Extracellular;Membrane	Organic acids and derivatives	Carboxylic acids and derivatives	Dicarboxylic acids and derivatives	Dicarboxylic acids and derivatives
M511T377	(M+H)+	Lyso-PAF C-18	0.714186	0.617161	0.280717	511.393	376.675	29869.4	41570.3	13792.5	7294.95	13268.7	3473.44	13239.9	16612.5	8683.31	7714.96	12448.6	8737.43	11414.7	11693	11690.3
M243T110	(M+H)+	Lumichrome	0.489695	0.610561	0.0462901	243.087	110.462	9162.21	9911.81	8837.35	8507.2	5526.84	4923.61	2874.54	2288.34	7252.66	4334.29	8537.85	3328.7	4611.59	4580.38	4665.13	C01727
M180T545	(M-H)-	L-Tyrosine	0.569361	0.73633	0.112027	180.066	545.084	40882	48331.7	54419.9	37754.7	55444.6	37407.4	21966.5	24832.5	52961.6	29724.4	51813.5	20633	19026.1	20028.2	20045.3	C00082	HMDB0000158	Cytoplasm;Extracellular;Mitochondria
M182T599	(M+H)+	L-Tyrosine	1.20094	0.537642	0.0635306	182.081	599.027	70280.9	74636.2	34990.7	26302.1	30850.5	27203.8	19282.2	14219.6	34120.6	17168.1	34571	22718	10690.4	11268.3	11267.3	C00082	HMDB0000158	Cytoplasm;Extracellular;Mitochondria
M203T458	(M-H)-	L-Tryptophan	0.881357	0.526362	0.0877342	203.082	458.433	35919.8	36556.4	13209	11567.4	14114.7	11629.7	9281.75	12265.5	14411	6529.87	12846.7	9406.14	5099.05	4509.86	5100.47	C00078	HMDB0000929	Extracellular	Organoheterocyclic compounds	Indoles and derivatives	Indolyl carboxylic acids and derivatives	Indolyl carboxylic acids and derivatives
M205T516	(M+H)+	L-Tryptophan	0.83917	0.415361	0.0942834	205.096	515.725	38773.5	36749.1	9943.75	10529.4	9617.73	7928.81	7973.04	7646.91	7816.14	7630.07	9492.29	6602.59	7958.89	7957.93	7814.98	C00078	HMDB0000929	Extracellular	Organoheterocyclic compounds	Indoles and derivatives	Indolyl carboxylic acids and derivatives	Indolyl carboxylic acids and derivatives
M118T709	(M-H)-	L-Threonine	0.293631	0.633215	0.285325	118.05	708.69	8533.62	18962.7	1386.66	4656.39	5742.73	6674.55	3696.21	6278.84	5435.43	4937.57	4607.95	4144.45	3039.9	3519.09	3523.69	C00188	HMDB0000167	Cytoplasm;Extracellular
M135T611	(M-H)-	L-Threonate	1.3331	0.54791	0.0338375	135.029	610.742	50874.8	82542.5	27673	65409.3	50015.8	26139.7	36341.9	28657.7	27627.9	15983.7	30275.8	26940.7	10539.1	11182.8	11495	C01620	HMDB0000943/HMDB0062620	Cytoplasm (predicted from logP)	Organic oxygen compounds	Organooxygen compounds	Carbohydrates and carbohydrate conjugates	Sugar acids and derivatives
M135T611	(M-H)-	L-Threonate	1.3331	0.54791	0.0338375	135.029	610.742	50874.8	82542.5	27673	65409.3	50015.8	26139.7	36341.9	28657.7	27627.9	15983.7	30275.8	26940.7	10539.1	11182.8	11495	C01620	HMDB0000943/HMDB0062620	Cytoplasm (predicted from logP)	Organic oxygen compounds	Organooxygen compounds	Carbohydrates and carbohydrate conjugates	Sugar acids and derivatives
M277T896	(M+H)+	L-Saccharopine	1.44678	0.764174	0.296442	277.139	895.73	125589	179019	103595	57022.5	76606.6	66928.3	102212	90733.3	107478	55251.5	71380.6	38143.1	43224	45684.5	45677.3	C00449	HMDB0000279/HMDB0062698	Mitochondria	Organic acids and derivatives	Carboxylic acids and derivatives	Amino acids, peptides, and analogues	Glutamic acid and derivatives
M275T836	(M-H)-	L-Saccharopine	0.529663	0.723613	0.279049	275.124	835.718	17303.8	26139.4	13627.6	5533.77	10491.6	9815.09	11845.4	12911.9	14457.4	6350.11	9836.83	4593.95	5412.46	5701.04	5414.59	C00449	HMDB0000279/HMDB0062698	Mitochondria	Organic acids and derivatives	Carboxylic acids and derivatives	Amino acids, peptides, and analogues	Glutamic acid and derivatives
M130T792	(M+H)+	L-Pyroglutamic acid	0.60453	0.809915	0.262748	130.049	791.549	83765.6	74579.3	45350.7	37242	49810.9	43791.5	41143.8	33372.4	57272.5	33162.4	58273.3	47724.4	26261	26250.9	26697.9	C01879	HMDB0000267/HMDB0000805/HMDB0060262	Cytoplasm (predicted from logP)	Organic acids and derivatives	Carboxylic acids and derivatives	Amino acids, peptides, and analogues	Alpha amino acids and derivatives
M128T731	(M-H)-	L-Pyroglutamic acid	1.10872	0.727248	0.26171	128.035	731.227	105033	121022	61305.8	31328.4	63350.5	45697.2	48666.9	38557.9	85622.7	31008	64134.7	43080.2	22035.4	23945	23954.9	C01879	HMDB0000267/HMDB0000805/HMDB0060262	Cytoplasm (predicted from logP)	Organic acids and derivatives	Carboxylic acids and derivatives	Amino acids, peptides, and analogues	Alpha amino acids and derivatives
M114T570	(M-H)-	L-Proline	0.702116	0.740354	0.272274	114.055	570.459	80067.9	50607.7	51849.1	24546	45977.7	23350	34144.3	20905.4	59896.3	23415.4	28981.2	37290.1	15888.6	11058.4	17454.1	C00148	HMDB0000162	Cytoplasm;Extracellular;Mitochondria;Lysosome;Endoplasmic reticulum	Organic acids and derivatives	Carboxylic acids and derivatives	Amino acids, peptides, and analogues	Proline and derivatives
M164T456	(M-H)-	L-Phenylalanine	2.92387	0.44022	0.0476458	164.071	456.106	244459	307816	117151	105594	103067	82866.9	68128.8	51951.4	121755	34932.4	81176.2	65087.6	28491.4	25984.8	26080.2	C00079	HMDB0000159	Cytoplasm;Extracellular;Mitochondria	Organic acids and derivatives	Carboxylic acids and derivatives	Amino acids, peptides, and analogues	Phenylalanine and derivatives
M164T456	(M-H)-	L-Phenylalanine	2.92387	0.44022	0.0476458	164.071	456.106	244459	307816	117151	105594	103067	82866.9	68128.8	51951.4	121755	34932.4	81176.2	65087.6	28491.4	25984.8	26080.2	C00079	HMDB0000159	Cytoplasm;Extracellular;Mitochondria	Organic acids and derivatives	Carboxylic acids and derivatives	Amino acids, peptides, and analogues	Phenylalanine and derivatives
M166T522	(M+H)+	L-Phenylalanine	2.17671	0.436946	0.00786367	166.085	522.253	150751	150267	61272.6	95132.8	149430	59934.7	38461.9	41536.9	72774.4	45169.7	50334.8	43073.1	27887.7	27838.9	27613.4	C00079	HMDB0000159	Cytoplasm;Extracellular;Mitochondria	Organic acids and derivatives	Carboxylic acids and derivatives	Amino acids, peptides, and analogues	Phenylalanine and derivatives
M400T338	(M+H)+	L-Palmitoylcarnitine	0.292116	1.01076	0.976467	400.341	338.157	60353.5	69721.2	73818.4	17801	21513.5	89005.4	40618	50089.4	131907	47548	22875.3	42750	43749.9	40907.3	40830	C02990	HMDB0000222	Cytoplasm;Extracellular;Membrane;Mitochondria	Lipids and lipid-like molecules	Fatty Acyls	Fatty acid esters	Acyl carnitines
M130T491	(M-H)-	L-Norleucine	3.45475	0.433628	0.0891604	130.087	490.63	468411	384586	164789	120070	151443	72785.7	91026.2	52696.7	170530	56474.3	146507	73403.9	34615.4	36776.6	36732.1	C01933	HMDB0001645	Cellular Locations Not Available	Organic acids and derivatives	Carboxylic acids and derivatives	Amino acids, peptides, and analogues	L-alpha-amino acids
M130T491	(M-H)-	L-Norleucine	3.45475	0.433628	0.0891604	130.087	490.63	468411	384586	164789	120070	151443	72785.7	91026.2	52696.7	170530	56474.3	146507	73403.9	34615.4	36776.6	36732.1	C01933	HMDB0001645	Cellular Locations Not Available	Organic acids and derivatives	Carboxylic acids and derivatives	Amino acids, peptides, and analogues	L-alpha-amino acids
M189T1085	(M+H)+	L-NG-Monomethylarginine	0.146864	0.750758	0.130638	189.135	1084.77	7677.49	5152.66	4534.43	2861.48	3371.66	5568.04	4570.07	3376.71	3654.65	3125.42	3273.34	3896.25	2469.27	2723.07	2469.99
M150T573	(M+H)+	L-Methionine	0.695004	0.537856	0.235718	150.057	572.975	38795.3	11855.5	6595.22	17957.4	11021.4	4908.4	6522.29	3167.66	15325.9	3414.07	15044.7	5541.83	4749.3	6019.59	4760.64	C00073	HMDB0000696	Extracellular	Organic acids and derivatives	Carboxylic acids and derivatives	Amino acids, peptides, and analogues	Methionine and derivatives
M148T510	(M-H)-	L-Methionine	1.26696	0.411049	0.115286	148.043	510.253	25719.4	83338.9	34412.8	9417.58	29687.2	13634.4	7181.18	18653.9	23775	9480.36	12680.9	8880.67	5622.75	7036.66	7020.05	C00073	HMDB0000696	Extracellular	Organic acids and derivatives	Carboxylic acids and derivatives	Amino acids, peptides, and analogues	Methionine and derivatives
M133T742	(M-H)-	L-Malic acid	2.21617	0.67884	0.216982	133.014	742.297	395850	371498	190176	92557.6	205143	124843	175075	116976	254651	105183	138553	146407	76717.9	76538.9	79346.3	C00149	HMDB0000156	Cytoplasm	Organic acids and derivatives	Hydroxy acids and derivatives	Beta hydroxy acids and derivatives	Beta hydroxy acids and derivatives
M145T1020	(M-H)-	L-Lysine	0.585241	0.825639	0.771445	145.098	1019.97	23055.1	68774.5	10708.8	10103.6	21073.9	13157.6	11546.2	7739.27	74769	5687.88	15090.4	6431.54	2143.17	1395.51	3220.89	C00047	HMDB0000182	Cytoplasm;Extracellular;Mitochondria;Nucleus;Peroxisome	Organic acids and derivatives	Carboxylic acids and derivatives	Amino acids, peptides, and analogues	L-alpha-amino acids
M132T527	(M+H)+	L-Leucine	1.60203	0.536265	0.0554743	132.101	526.643	134031	154549	71875.6	57604.9	61043.8	50496.1	35881.9	35139.8	67620.3	38904.6	55479.2	50980.3	23418.3	23809.1	23419.4	C00123	HMDB0000687	Extracellular;Mitochondria	Organic acids and derivatives	Carboxylic acids and derivatives	Amino acids, peptides, and analogues	Leucine and derivatives
M207T464	(M-H)-	L-Kynurenine	0.196277	0.902935	0.801031	207.077	464.334	4242.27	4491.29	1839.43	1412.37	858.261	1371.39	4645.81	2086.85	3112.01	1117.58	813.917	1059.06	921.933	853.555	916.46	C00328	HMDB0000684	Cytoplasm (predicted from logP)	Organic oxygen compounds	Organooxygen compounds	Carbonyl compounds	Alkyl-phenylketones
M209T521	(M+H)+	L-Kynurenine	0.793428	0.377171	0.0855386	209.091	520.907	20711.5	31291.3	9787.75	5805.91	7130.41	5222.76	5319.92	5796.6	7323.38	3682.43	5963.96	2068.35	3958.53	4181.53	3944.6	C00328	HMDB0000684	Cytoplasm (predicted from logP)	Organic oxygen compounds	Organooxygen compounds	Carbonyl compounds	Alkyl-phenylketones
M132T550	(M+H)+	L-Isoleucine	1.28706	0.563924	0.0241867	132.101	549.875	81568	58186.5	55695.3	40751.2	40396.1	30349.6	21491.2	20008.3	45504.5	25210	34986.3	25894.5	15451.4	15379.2	17704.3	C00407	HMDB0000172	Cytoplasm;Extracellular;Mitochondria	Organic acids and derivatives	Carboxylic acids and derivatives	Amino acids, peptides, and analogues	Isoleucine and derivatives
M241T687	(M+CH3COO)-	L-Iditol	1.68141	0.332107	0.0527484	241.092	686.613	55458.5	88059.6	32830.3	13414	25172	19362.3	14239.9	22259.7	20378.3	7087.16	10901.5	2944.86	3819.46	3932.39	3928.55	C01507	HMDB0011632	Extracellular;Membrane	Organic oxygen compounds	Organooxygen compounds	Carbohydrates and carbohydrate conjugates	Sugar alcohols
M241T687	(M+CH3COO)-	L-Iditol	1.68141	0.332107	0.0527484	241.092	686.613	55458.5	88059.6	32830.3	13414	25172	19362.3	14239.9	22259.7	20378.3	7087.16	10901.5	2944.86	3819.46	3932.39	3928.55	C01507	HMDB0011632	Extracellular;Membrane	Organic oxygen compounds	Organooxygen compounds	Carbohydrates and carbohydrate conjugates	Sugar alcohols
M199T368	(M+NH4-2H)-	L-homocysteic acid	0.0417774	0.856789	0.467984	199.037	368.29	3982.79	2648.06	2718.7	2581.6	2684.55	2152.69	1605.6	969.981	4274.6	2959.3	2242.99	2314.5	1547.74	1806.6	1561.3	C16511	HMDB0002205	Cellular Locations Not Available	Organic acids and derivatives	Carboxylic acids and derivatives	Amino acids, peptides, and analogues	L-alpha-amino acids
M156T832	(M+H)+	L-Histidine	0.334636	1.18847	0.561372	156.076	831.541	37122.3	19463.5	20719.6	19093	24516.1	19811.8	30650.7	14808.4	59573.3	15934.1	25373.7	20908.4	18004.8	17977.7	16739.8	C00135	HMDB0000177	Cytoplasm;Extracellular	Organic acids and derivatives	Carboxylic acids and derivatives	Amino acids, peptides, and analogues	Histidine and derivatives
M147T745	(M+H)+	L-Glutamine	0.518191	1.15774	0.478243	147.075	744.856	50023.4	34445.6	64869.3	21484.6	57781.8	47482.6	60029.7	40000.7	78541.9	25639.7	58429.1	56995	46632.5	47236.5	47236.1	C00064	HMDB0000641	Extracellular;Mitochondria	Organic acids and derivatives	Carboxylic acids and derivatives	Amino acids, peptides, and analogues	L-alpha-amino acids
M148T792_2	(M+H)+	L-Glutamate	1.09089	0.758432	0.154606	148.06	791.54	178959	177351	107699	86599.2	109833	93738	75560.3	74522.5	122798	71523.2	123964	103625	53477.4	55432.7	55426.9	C00025	HMDB0000148	Extracellular;Mitochondria;Lysosome;Endoplasmic reticulum	Organic acids and derivatives	Carboxylic acids and derivatives	Amino acids, peptides, and analogues	Glutamic acid and derivatives
M146T731	(M-H)-	L-Glutamate	2.86401	0.719001	0.257288	146.045	731.227	683178	811413	402054	198751	397726	308517	313604	241657	555382	197774	420772	285194	133734	135858	139044	C00025	HMDB0000148	Extracellular;Mitochondria;Lysosome;Endoplasmic reticulum	Organic acids and derivatives	Carboxylic acids and derivatives	Amino acids, peptides, and analogues	Glutamic acid and derivatives
M243T825	(M-H)-	L-Fucose-1-phosphate	0.173472	0.790569	0.433605	243.027	824.84	2694.34	8041.63	3007.89	1389.91	3523.96	3450.22	2928.01	3009.55	3329.78	2966.21	3221.24	2023.06	1963.59	1907.88	1908.59	C02985	HMDB0001265/HMDB0062489	Cytoplasm	Organic oxygen compounds	Organooxygen compounds	Carbohydrates and carbohydrate conjugates	Monosaccharide phosphates
M206T390	(M+Na)+	Levonordefrin	0.19616	0.885395	0.759	206.083	389.841	4695.47	2133.85	2726.79	12898.3	3745.8	3056.46	3042.66	5150.71	6850.45	4724.63	3803.77	2331.54	2670.12	2456.51	2423.87
M157T530	(M-H)-	L-dihydroorotate	0.771267	0.703858	0.534703	157.025	530.091	56049.9	38377.6	7095.36	4260.52	9846.9	9087.51	10886.7	31815.4	20793.4	9295.51	8514.96	6477.58	8526.17	8666.86	9160	C00337	HMDB0000528/HMDB0003349	Cytoplasm;Cytoplasm (predicted from logP)	Organic acids and derivatives	Carboxylic acids and derivatives	Amino acids, peptides, and analogues	Alpha amino acids and derivatives
M241T873	(M+H)+	L-Cystine	0.302107	1.22167	0.37683	241.03	873.091	4480.42	5129.77	4964.98	3007.63	3266.59	3971.31	2982.83	6005.1	7353.36	2798.78	3411.92	7770.74	2619.47	2642.55	2642.58	C00491	HMDB0000192	Cytoplasm;Extracellular	Organic acids and derivatives	Carboxylic acids and derivatives	Amino acids, peptides, and analogues	L-cysteine-S-conjugates
M174T719	(M-H)-	L-Citrulline	0.160662	0.986357	0.964699	174.088	718.789	4387.58	4999.29	1007.59	1468.23	2589.08	3522.76	3704.57	1519.14	4251.41	1341.07	2000.07	4913.05	1469.61	1495.58	1590.69	C00327	HMDB0000904	Mitochondria	Organic acids and derivatives	Carboxylic acids and derivatives	Amino acids, peptides, and analogues	L-alpha-amino acids
M176T786	(M+H)+	L-Citrulline	0.198529	0.834525	0.343923	176.102	786.423	1578.83	4913.71	4689.87	3989.98	3368.22	4951.73	1426.57	3920.25	3506.73	3276.69	3663.1	3811.6	2292.16	2298.88	2718.95	C00327	HMDB0000904	Mitochondria	Organic acids and derivatives	Carboxylic acids and derivatives	Amino acids, peptides, and analogues	L-alpha-amino acids
M227T839	(M+H)+	L-Carnosine	0.0976178	0.871994	0.558891	227.113	839.106	60957.2	44083.9	54012.5	11652.7	30692.5	55336.3	26257.1	24050.5	42009	31264.2	54878.4	45412.3	16167.2	10937.5	16025.1	C00386	HMDB0000033	Cytoplasm	Organic acids and derivatives	Peptidomimetics	Hybrid peptides	Hybrid peptides
M220T645	(M+CH3COO)-	L-Carnitine	1.57355	0.614151	0.0828368	220.119	645.14	105232	103835	94399.9	39865.8	70629.8	48379.6	76669.8	42729.6	63077.6	30064.2	62014.4	9392.65	35742	35748.1	34127.3	C00318	HMDB0000062	Cytoplasm;Extracellular;Mitochondria;Endoplasmic reticulum;Peroxisome	Organic nitrogen compounds	Organonitrogen compounds	Quaternary ammonium salts	Carnitines
M220T645	(M+CH3COO)-	L-Carnitine	1.57355	0.614151	0.0828368	220.119	645.14	105232	103835	94399.9	39865.8	70629.8	48379.6	76669.8	42729.6	63077.6	30064.2	62014.4	9392.65	35742	35748.1	34127.3	C00318	HMDB0000062	Cytoplasm;Extracellular;Mitochondria;Endoplasmic reticulum;Peroxisome	Organic nitrogen compounds	Organonitrogen compounds	Quaternary ammonium salts	Carnitines
M162T700	(M+H)+	L-Carnitine	5.70264	0.609523	0.0357936	162.112	700.422	1.2046e+06	1.12861e+06	1.0276e+06	561078	804288	672301	777292	540250	681347	352045	762846	176721	472529	472489	463684	C00318	HMDB0000062	Cytoplasm;Extracellular;Mitochondria;Endoplasmic reticulum;Peroxisome	Organic nitrogen compounds	Organonitrogen compounds	Quaternary ammonium salts	Carnitines
M132T771_2	(M-H)-	L-Aspartate	1.03543	0.870934	0.624277	132.03	771.072	111735	181277	122501	46431.9	116442	92806.1	121851	94002.6	185156	66368.2	94703.4	22484.2	47667.7	49855.5	49849.8	C00049	HMDB0000191	Cytoplasm;Extracellular;Mitochondria	Organic acids and derivatives	Carboxylic acids and derivatives	Amino acids, peptides, and analogues	Aspartic acid and derivatives
M134T802	(M+H)+	L-Aspartate	0.555595	0.741859	0.358307	134.044	802.216	29906.9	25176.8	15323.1	5746.25	12483.9	8327.11	9332.07	8309.26	18709.2	8410.42	17132.7	10040	5633.15	5377.02	5378.91	C00049	HMDB0000191	Cytoplasm;Extracellular;Mitochondria	Organic acids and derivatives	Carboxylic acids and derivatives	Amino acids, peptides, and analogues	Aspartic acid and derivatives
M133T753	(M+H)+	L-Asparagine	0.147787	0.816833	0.516864	133.06	753.418	5044.85	2934.34	2497.91	1433.1	960.997	1981.54	1772.32	1013.69	2839.43	1348.01	3027.74	2131.01	1113.21	1105.64	865.384	C00152	HMDB0000168	Cytoplasm;Extracellular;Mitochondria
M131T690	(M-H)-	L-Asparagine	0.42319	0.739951	0.36326	131.046	689.759	22706.6	15576.4	13071.9	3735.1	14653.6	5327.88	8228.96	3658.65	16079.8	5393.34	12214.9	9973.68	3611.23	3782.9	3776.41	C00152	HMDB0000168	Cytoplasm;Extracellular;Mitochondria
M127T938	(M+H)+	Larixinic Acid	0.503666	0.739448	0.247018	127.038	937.597	22053.2	25427.3	19954	4478.77	16169	12731.5	12020.2	8774.28	19231.1	7286.45	15912.9	11321.6	6872.09	6872.19	6991.02
M175T1053	(M+H)+	L-Arginine	1.59269	0.546804	0.0906448	175.118	1053.1	76444.3	232478	95506.3	209865	118847	92840.3	77444.2	47769	116651	51862.2	15062.8	142860	45760.6	45778.6	41855.6	C00062	HMDB0000517	Cytoplasm;Extracellular;Mitochondria	Organic acids and derivatives	Carboxylic acids and derivatives	Amino acids, peptides, and analogues	L-alpha-amino acids
M241T830	(M+H)+	L-Anserine	0.217425	1.06983	0.860099	241.129	830.359	49211.3	47025	50774.2	9766.25	20587.6	27985.3	19973	9223.6	31390.5	18825.9	78373.4	61903.5	12745.1	13367.1	13370.9	C01262	HMDB0000194	Cytoplasm	Organic acids and derivatives	Peptidomimetics	Hybrid peptides	Hybrid peptides
M239T766	(M-H)-	L-Anserine	0.349853	1.03662	0.930073	239.114	765.756	4055.59	15415.2	13893.2	2878	4111.41	9834.06	3046.81	4038.12	5063.01	7807.63	19435.1	12634.7	2810.25	3250.04	2796.82	C01262	HMDB0000194	Cytoplasm	Organic acids and derivatives	Peptidomimetics	Hybrid peptides	Hybrid peptides
M188T356	(M-H)-	Kynurenic acid	1.77502	0.444014	0.0197727	188.035	356.259	95823.1	45299.8	48880.4	44883.7	48012.4	36803.1	24930.6	14501.1	43345.9	13490.4	40016.4	5667.89	19939	19968.1	21244.7	C01717	HMDB0000715	Cytoplasm	Organoheterocyclic compounds	Quinolines and derivatives	Quinoline carboxylic acids	Quinoline carboxylic acids
M188T356	(M-H)-	Kynurenic acid	1.77502	0.444014	0.0197727	188.035	356.259	95823.1	45299.8	48880.4	44883.7	48012.4	36803.1	24930.6	14501.1	43345.9	13490.4	40016.4	5667.89	19939	19968.1	21244.7	C01717	HMDB0000715	Cytoplasm	Organoheterocyclic compounds	Quinolines and derivatives	Quinoline carboxylic acids	Quinoline carboxylic acids
M190T403	(M+H)+	Kynurenic acid	2.26866	0.378	0.00308751	190.049	402.74	110182	85163.5	71238.3	93536.4	59147.6	58991.4	735.833	32842.3	68836.3	23685.8	41711.6	12969.9	579.413	612.429	610.356	C01717	HMDB0000715	Cytoplasm	Organoheterocyclic compounds	Quinolines and derivatives	Quinoline carboxylic acids	Quinoline carboxylic acids
M158T362	(M-H)-	Isovalerylglycine	1.36169	0.22067	0.0677942	158.082	362.428	35972.3	7523.46	5718.16	52967.2	23618.9	3310.64	4992.23	3392.01	9323.33	1540.87	4735.73	4506.6	1729.88	1699.6	1734.05		HMDB0000678	Cellular Locations Not Available	Organic acids and derivatives	Carboxylic acids and derivatives	Amino acids, peptides, and analogues	N-acyl-alpha amino acids
M158T362	(M-H)-	Isovalerylglycine	1.36169	0.22067	0.0677942	158.082	362.428	35972.3	7523.46	5718.16	52967.2	23618.9	3310.64	4992.23	3392.01	9323.33	1540.87	4735.73	4506.6	1729.88	1699.6	1734.05		HMDB0000678	Cellular Locations Not Available	Organic acids and derivatives	Carboxylic acids and derivatives	Amino acids, peptides, and analogues	N-acyl-alpha amino acids
M144T394	(M-H)-	Isobutyrylglycine	0.835381	0.232892	0.0543094	144.066	393.707	17698.9	3371.37	2326.97	17613.6	10239.2	1690.1	1991.11	1898.7	4516.16	611.589	1530.18	1781.62	807.701	804.547	861.588		HMDB0000730	Cytoplasm (predicted from logP);	Organic acids and derivatives	Carboxylic acids and derivatives	Amino acids, peptides, and analogues	N-acyl-alpha amino acids
M329T812	(M-H2O-H)-	Inosine 5'-monophosphate (IMP)	0.107804	0.904182	0.691894	329.025	812.251	5086.56	2441.09	2871.07	2661.8	6216.04	2257.64	4354.19	4088.28	2837.81	3391.59	3839.72	959.25	2626.66	1951.96	2623.35	C00130	HMDB0000175	Cytoplasm;Extracellular;Mitochondria	Nucleosides, nucleotides, and analogues	Purine nucleotides	Purine ribonucleotides	Purine ribonucleoside monophosphates
M267T412	(M-H)-	Inosine	5.51629	0.566939	0.178922	267.073	411.757	1.10961e+06	1.90601e+06	873496	87137.8	663952	676611	631838	837303	324077	383950	646318	190827	368907	307225	387719	C00294	HMDB0000195	Cytoplasm;Extracellular;Mitochondria;Lysosome	Nucleosides, nucleotides, and analogues	Purine nucleosides		Purine nucleosides
M269T435	(M+H)+	Inosine	3.62321	0.526116	0.0658308	269.088	434.968	473913	659730	289902	178626	237814	248310	202000	247195	246908	125013	203475	74094.9	127158	127169	128071	C00294	HMDB0000195	Cytoplasm;Extracellular;Mitochondria;Lysosome	Nucleosides, nucleotides, and analogues	Purine nucleosides		Purine nucleosides
M212T42_1	(M-H)-	Indoxyl sulfate	6.0437	0.771813	0.542348	212.002	41.737	2.51556e+06	1.58621e+06	1.06396e+06	3.71878e+06	2.50328e+06	469826	954222	1.40985e+06	4.10219e+06	462809	1.00059e+06	1.22219e+06	306831	306778	315570		HMDB0000682	Cytoplasm;	Organic acids and derivatives	Organic sulfuric acids and derivatives	Arylsulfates	Arylsulfates
M204T236	(M-H)-	Indolelactic acid	2.13563	0.255354	0.0789407	204.066	235.815	63157.3	15541.8	26985.8	146493	68224.4	9597.75	19312.9	18726.1	15589.4	5115.1	12548.4	12974.8	5957.6	5916.23	4103.2	C02043	HMDB0000671	Cellular Locations Not Available	Organoheterocyclic compounds	Indoles and derivatives	Indolyl carboxylic acids and derivatives	Indolyl carboxylic acids and derivatives
M204T236	(M-H)-	Indolelactic acid	2.13563	0.255354	0.0789407	204.066	235.815	63157.3	15541.8	26985.8	146493	68224.4	9597.75	19312.9	18726.1	15589.4	5115.1	12548.4	12974.8	5957.6	5916.23	4103.2	C02043	HMDB0000671	Cellular Locations Not Available	Organoheterocyclic compounds	Indoles and derivatives	Indolyl carboxylic acids and derivatives	Indolyl carboxylic acids and derivatives
M160T169	(M-H)-	Indole-3-carboxylic acid	0.698946	0.25174	0.167737	160.04	168.7	27697.6	4723.67	2902.14	2534.75	9612.32	1639.65	1636.01	1926.79	4995.94	722.718	1406.94	1674.59	862.978	1036.16	879.387	C19837	HMDB0003320	Cellular Locations Not Available	Organoheterocyclic compounds	Indoles and derivatives	Indolecarboxylic acids and derivatives	Indolecarboxylic acids and derivatives
M135T334	(M-H)-	Hypoxanthine	1.26736	0.822993	0.356546	135.031	334.122	306052	387686	404111	125893	373060	367411	346381	220099	334642	172096	397083	146233	235339	230388	253790	C00262	HMDB0000157	Cytoplasm;Extracellular;Lysosome;Peroxisome	Organoheterocyclic compounds	Imidazopyrimidines	Purines and purine derivatives	Hypoxanthines
M137T435	(M+H)+	Hypoxanthine	7.03455	0.440919	0.0337265	137.045	435.016	1.17826e+06	1.77997e+06	827833	570519	718762	667549	610240	154957	742541	114647	656908	252857	400996	397085	400975	C00262	HMDB0000157	Cytoplasm;Extracellular;Lysosome;Peroxisome	Organoheterocyclic compounds	Imidazopyrimidines	Purines and purine derivatives	Hypoxanthines
M108T628	(M-H)-	Hypotaurine	1.86105	0.426218	0.095722	108.012	628.42	127309	97118.8	43922.5	17724.8	45860.7	26406.4	44478.8	24019.8	29108.5	12687.5	37899	4538.19	19955.7	21066.1	21001.3	C00519	HMDB0000965	Cytoplasm (predicted from logP)	Organic acids and derivatives	Sulfinic acids and derivatives	Sulfinic acids	Sulfinic acids
M108T628	(M-H)-	Hypotaurine	1.86105	0.426218	0.095722	108.012	628.42	127309	97118.8	43922.5	17724.8	45860.7	26406.4	44478.8	24019.8	29108.5	12687.5	37899	4538.19	19955.7	21066.1	21001.3	C00519	HMDB0000965	Cytoplasm (predicted from logP)	Organic acids and derivatives	Sulfinic acids and derivatives	Sulfinic acids	Sulfinic acids
M181T361	(M-H)-	Hydroxyphenyllactic acid	1.34584	0.354725	0.00314714	181.05	361.105	34269.1	24159.3	17945.2	26819.8	24274.2	10010.9	12113.5	7268.09	13188.4	3186.24	10305.3	2705.54	5511.36	5511.49	5668.28	C03672	HMDB0000755	Mitochondria	Phenylpropanoids and polyketides	Phenylpropanoic acids		Phenylpropanoic acids
M181T361	(M-H)-	Hydroxyphenyllactic acid	1.34584	0.354725	0.00314714	181.05	361.105	34269.1	24159.3	17945.2	26819.8	24274.2	10010.9	12113.5	7268.09	13188.4	3186.24	10305.3	2705.54	5511.36	5511.49	5668.28	C03672	HMDB0000755	Mitochondria	Phenylpropanoids and polyketides	Phenylpropanoic acids		Phenylpropanoic acids
M131T205	(M-H)-	Hydroxyisocaproic acid	6.85077	0.502024	0.014632	131.071	205.335	1.33732e+06	673760	681229	1.14504e+06	1.07748e+06	571736	667768	377649	688689	219805	575283	225193	242538	244301	260715	C03264	HMDB0000624	Extracellular;Membrane	Lipids and lipid-like molecules	Fatty Acyls	Fatty acids and conjugates	Hydroxy fatty acids
M131T205	(M-H)-	Hydroxyisocaproic acid	6.85077	0.502024	0.014632	131.071	205.335	1.33732e+06	673760	681229	1.14504e+06	1.07748e+06	571736	667768	377649	688689	219805	575283	225193	242538	244301	260715	C03264	HMDB0000624	Extracellular;Membrane	Lipids and lipid-like molecules	Fatty Acyls	Fatty acids and conjugates	Hydroxy fatty acids
M205T844	(M-H)-	Homocitrate	0.260323	0.594208	0.182123	205.035	843.909	3467.13	4059.82	1206.21	6012.22	2279.35	886.751	1102.17	1390.65	2636.73	1952.1	937.793	2623.71	832.948	895.838	797.605	C01251	HMDB0003518	Cytoplasm (predicted from logP)	Organic acids and derivatives	Carboxylic acids and derivatives	Tricarboxylic acids and derivatives	Tricarboxylic acids and derivatives
M235T286	(M+H-H2O)+	His-Pro	0.477666	0.521731	0.0836294	235.119	285.887	5915.58	5294.95	3011.47	9251.52	9628.62	2126.65	4030.66	1679.88	5797.17	972.018	3751.91	2148.3	1765.89	1917.07	1917.66
M285T825	(M+H)+	His-Glu	0.168435	0.770074	0.399264	285.119	824.569	4678.05	2214.04	997.707	2983.67	2438.79	1518.65	1672.67	1376.28	2331.57	968.433	3543.95	1528	1506.25	1557.19	1504.31
M178T358	(M-H)-	Hippuric acid	2.35189	0.284858	0.111728	178.05	358.42	140157	24501.8	12591.2	180530	79529.8	8477.65	17633.2	9173.53	55042	5451.9	16972.3	22713.1	4310.06	4310.52	4441.12	C01586	HMDB0000714/HMDB0011723/HMDB0062583	Cytoplasm	Benzenoids	Benzene and substituted derivatives	Benzoic acids and derivatives	Hippuric acids
M180T401	(M+H)+	Hippuric acid	0.906478	0.278725	0.101801	180.065	400.85	28502.8	7288.65	4444.8	41211.2	14554.2	1556.21	3810.72	1806.11	10826	1567.7	3293.66	5887.67	888.737	1408.11	1387.63	C01586	HMDB0000714/HMDB0011723/HMDB0062583	Cytoplasm	Benzenoids	Benzene and substituted derivatives	Benzoic acids and derivatives	Hippuric acids
M172T344	(M-H)-	Hexanoylglycine	1.26666	0.224897	0.127962	172.097	343.762	16907	4476.72	3277.17	53112.9	23562.9	2697.9	3341.85	2503.67	11459	1690.83	1550.71	2850.91	1459	1460.79	1537.61		HMDB0000701	Membrane;	Organic acids and derivatives	Carboxylic acids and derivatives	Amino acids, peptides, and analogues	N-acyl-alpha amino acids
M284T526	(M+H)+	Guanosine	0.48663	0.675269	0.173669	284.098	526.051	17413.2	31400.9	15006.1	7828.27	11811.3	11831.3	8620.37	12776.6	14604.8	8668.18	10367.1	9310.1	7762.27	7716.1	7716.29	C00387	HMDB0000133	Extracellular;Mitochondria;Lysosome	Nucleosides, nucleotides, and analogues	Purine nucleosides		Purine nucleosides
M282T470	(M-H)-	Guanosine	0.745565	0.594101	0.150395	282.083	469.526	23316	35515.3	13802.1	8039.63	14049.4	9675.14	9796.55	10276.4	17882.5	6868.45	10454	6744.81	7496.99	7477.45	7224.5	C00387	HMDB0000133	Extracellular;Mitochondria;Lysosome	Nucleosides, nucleotides, and analogues	Purine nucleosides		Purine nucleosides
M464T332	(M-H)-	Glycocholic acid	1.483	0.572133	0.0256154	464.313	332.286	45135.1	76757.5	85744.2	44927	77460.1	55730.4	40501.7	32110	53859.5	26766	58809.4	8656.07	36688	36166.6	37347.2	C01921	HMDB0000138/HMDB0032596	Extracellular	Lipids and lipid-like molecules	Steroids and steroid derivatives	Bile acids, alcohols and derivatives	Glycinated bile acids and derivatives
M464T332	(M-H)-	Glycocholic acid	1.483	0.572133	0.0256154	464.313	332.286	45135.1	76757.5	85744.2	44927	77460.1	55730.4	40501.7	32110	53859.5	26766	58809.4	8656.07	36688	36166.6	37347.2	C01921	HMDB0000138/HMDB0032596	Extracellular	Lipids and lipid-like molecules	Steroids and steroid derivatives	Bile acids, alcohols and derivatives	Glycinated bile acids and derivatives
M258T976	M+	Glycerophosphocholine	1.00442	0.574727	0.0942549	258.11	976.057	45577.3	80236.1	35191.6	110952	27792.8	59292.2	29873.3	53025.9	35136.1	42405.1	30842.2	15068.6	32053.1	33163	47349.7	C00670	HMDB0000086	Cytoplasm;Extracellular;Membrane	Lipids and lipid-like molecules	Glycerophospholipids	Glycerophosphocholines	Glycerophosphocholines
M105T549	(M-H)-	Glyceric acid	1.03187	0.547547	0.0928582	105.019	549.008	30336.5	53486.2	29545.6	30852.8	32090.2	9815.42	20056.9	16501	17386.8	6566.3	38140.1	3261.98	6804.18	8247.19	8127.07	C00258	HMDB0000139/HMDB0031818	Cytoplasm (predicted from logP)	Organic oxygen compounds	Organooxygen compounds	Carbohydrates and carbohydrate conjugates	Sugar acids and derivatives
M105T549	(M-H)-	Glyceric acid	1.03187	0.547547	0.0928582	105.019	549.008	30336.5	53486.2	29545.6	30852.8	32090.2	9815.42	20056.9	16501	17386.8	6566.3	38140.1	3261.98	6804.18	8247.19	8127.07	C00258	HMDB0000139/HMDB0031818	Cytoplasm (predicted from logP)	Organic oxygen compounds	Organooxygen compounds	Carbohydrates and carbohydrate conjugates	Sugar acids and derivatives
M171T892	(M+H)+	Glyceraldehyde 3-phosphate	0.18238	0.760453	0.0343046	171.004	891.995	2221.73	2052.21	2280.42	3081.32	2320.58	2883.66	2152.19	1462.6	2081.43	1594.79	2506.32	1487.76	1720.56	1688.4	1688.16	C00118/C00661	HMDB0001112	Cytoplasm (predicted from logP)	Organic oxygen compounds	Organooxygen compounds	Carbohydrates and carbohydrate conjugates	Glyceraldehyde-3-phosphates
M611T933	(M-H)-	Glutathione disulfide	0.35673	1.48625	0.202324	611.141	932.864	2290.86	1827.51	1969.93	1796.71	2195.05	2020.24	1690.45	1977.41	2316.02	3509.04	6332.55	2158.64	1958.21	1958.84	1802.46	C00127	HMDB0003337	Extracellular;Mitochondria	Organic acids and derivatives	Carboxylic acids and derivatives	Amino acids, peptides, and analogues	Oligopeptides
M330T870	(M+NH4-2H)-	Geranyl diphosphate	0.225078	0.703884	0.428604	330.095	870.347	4260.98	5803.97	2322.41	603.658	988.416	777.94	1217.86	1762.52	1717.19	1583.75	2037.77	2068.39	1284.38	1519.44	1513.4	C00341
M271T66	(M+H)+	Genistein	0.436594	1.48575	0.647275	271.059	66.252	48546.4	18321.5	6774.13	4176.67	13970.6	2900.34	12120.7	12081.2	96378.1	2296.32	6417.87	11391	1927.15	1776.2	1794.89	C06563/C09126	HMDB0003217/HMDB0033988	Membrane (predicted from logP);Cytoplasm;Extracellular	Phenylpropanoids and polyketides	Isoflavonoids	Isoflav-2-enes;Isoflavonoid O-glycosides	Isoflavones;Isoflavonoid O-glycosides
M277T433	(M+H-H2O)+	gamma-L-Glutamyl-L-phenylalanine	0.169232	0.756513	0.398716	277.118	432.639	2378.51	2174.63	1196.64	764.53	2102.97	1258.13	962.229	451.829	2067.43	523.721	2645.02	820.649	881.354	898.286	904.918
M275T844	(M-H)-	gamma-L-Glutamyl-L-glutamic acid	0.272297	0.713088	0.335789	275.087	844.497	1888.61	3223.83	1884.13	7227.47	3504.15	2239.69	1284.97	4412.56	2697.43	1871.51	2272.29	1700.09	1241.99	1098.11	1162.49	C05282	HMDB0011737	Cellular Locations Not Available	Organic acids and derivatives	Carboxylic acids and derivatives	Amino acids, peptides, and analogues	Glutamic acid and derivatives
M277T907	(M+H)+	gamma-L-Glutamyl-L-glutamic acid	0.835156	0.489424	0.0919631	277.103	907.149	9321.41	11462.9	7095.58	37225.7	24073.7	15700.4	6057.39	6982.83	5235.76	10497.2	10153.1	12404.4	9633.34	9609.45	9687.35	C05282	HMDB0011737	Cellular Locations Not Available	Organic acids and derivatives	Carboxylic acids and derivatives	Amino acids, peptides, and analogues	Glutamic acid and derivatives
M249T390	(M-H)-	Gamma-Glutamylcysteine	0.124142	0.712208	0.200823	249.055	390.14	2814.99	1929.41	959.511	1494.1	1135.59	1579.93	1775.27	1104.51	1679.03	1369.49	487.473	644.717	1483.96	1443.46	1482.5	C00669	HMDB0001049	Cytoplasm (predicted from logP)	Organic acids and derivatives	Carboxylic acids and derivatives	Amino acids, peptides, and analogues	N-acyl-alpha amino acids
M195T709	(M-H)-	Galactonic acid	1.25569	1.48455	0.406788	195.05	708.636	50801.7	29239.2	25906.2	27499.1	39446.1	14324.1	26973.8	43780.9	128196	20412	25703.4	32866.3	11056.8	10904.8	11056.7	C00880	HMDB0000565	Cytoplasm	Organic acids and derivatives	Hydroxy acids and derivatives	Medium-chain hydroxy acids and derivatives	Medium-chain hydroxy acids and derivatives
M164T72	(M-H)-	Formylanthranilic acid	0.146484	0.82084	0.595531	164.035	72.395	2683.46	4479.63	2859.62	3122.53	2749.26	1011.22	1590.02	2363.03	6184.91	830.501	1676.78	1231.65	1494.16	1492.68	1702.82	C05653	HMDB0004089	Cytoplasm	Benzenoids	Benzene and substituted derivatives	Benzoic acids and derivatives	Benzoic acids
M786T795	(M+H)+	Flavin adenine dinucleotide (FAD)	0.450066	0.5918	0.0684536	786.162	794.533	6201.78	10460.8	6049.45	3218.91	5840.21	4098.52	4756.17	3315.23	5522.5	1791.63	3984.42	1857.73	2193.88	2194.41	2104.47	C00016	HMDB0001248	Cytoplasm;Mitochondria;Endoplasmic reticulum;Peroxisome	Organic oxygen compounds	Organooxygen compounds	Carbohydrates and carbohydrate conjugates	Hexose phosphates
M131T555	(M-H)-	Ethylmalonic acid	0.298441	0.739812	0.486605	131.034	555.239	1430.74	1502.88	1152.08	5695.47	1892.79	854.772	1714.52	1269.51	1739.53	985.84	2080.48	1479.02	874.258	879.84	948.643		HMDB0000622	Extracellular;Membrane;	Lipids and lipid-like molecules	Fatty Acyls	Fatty acids and conjugates	Branched fatty acids
M321T53	(M+H-H2O)+	Erucic acid	0.471256	1.12858	0.533821	321.315	52.933	39761.4	29423.7	20585.1	34557.6	25798.8	20875.6	17623.5	48964.9	41973.2	24048.2	32850.5	27529.1	34603.2	34322.3	34322.2	C08316	HMDB0002068	Extracellular;Membrane (predicted from logP)	Lipids and lipid-like molecules	Fatty Acyls	Fatty acids and conjugates	Very long-chain fatty acids
M337T67_2	(M-H)-	Erucic acid	0.567096	1.11817	0.664518	337.309	67.204	12662.3	9782.4	10097.8	12018.5	5748.77	5900.39	5994.51	7701.72	11490	13835	4979.95	18851.4	7008.03	6454.42	7037.11	C08316	HMDB0002068	Extracellular;Membrane (predicted from logP)	Lipids and lipid-like molecules	Fatty Acyls	Fatty acids and conjugates	Very long-chain fatty acids
M230T653	(M+H)+	Ergothioneine	0.278462	0.583514	0.144763	230.095	652.913	6020.79	5847.16	2798.01	1442.4	1927.97	1802.25	1395.42	1546.02	2603.71	1877.5	2281.25	1872.21	1290.76	1340.13	1291.04	C05570	HMDB0003045	Cellular Locations Not Available	Organic acids and derivatives	Carboxylic acids and derivatives	Amino acids, peptides, and analogues	Histidine and derivatives
M495T61	(M-H)-	Enterostatin human	0.736093	0.984912	0.960469	495.276	61.129	50471	31139.6	25587.8	13084.4	12111.2	16354.1	10764.3	27254	40403.2	26966.5	26455.3	14660.4	16291.6	16291.7	16223
M293T38	(M-H)-	Embelin	0.953645	0.915116	0.698374	293.178	37.831	116438	111187	53173.3	45670.7	55247.2	52301.6	101288	64605.1	72456.2	45852.3	54522.2	58451.9	74546.7	71209.5	76834.9
M301T72_2	(M-H)-	Eicosapentaenoic acid	3.37386	1.31605	0.178181	301.216	72.14	198045	250159	185467	63858	226860	192056	186983	160814	373816	253273	274229	220185	135674	145561	145522	C06428	HMDB0001999	Extracellular;Membrane (predicted from logP)	Lipids and lipid-like molecules	Fatty Acyls	Fatty acids and conjugates	Long-chain fatty acids
M293T851	(M+H)+	EDTA	0.349802	0.448606	0.276385	293.098	850.815	1963.86	1562.14	1691.33	10849	1756.54	1387.21	1499.02	1404.56	1561.06	1100.35	1632.56	1420.21	1133.45	1017.41	1132.12	C00284	HMDB0015109	Cytoplasm;Extracellular;Membrane	Organic acids and derivatives	Carboxylic acids and derivatives	Tetracarboxylic acids and derivatives	Tetracarboxylic acids and derivatives
M179T482	(M-H)-	D-Tagatose	1.94294	0.455874	0.00790778	179.056	481.987	78378.2	59406.3	107813	102717	79635.8	51748.5	76859.8	17550	32056	11490.9	38013.2	42712.3	17422.7	17483.2	18501.3	C00795	HMDB0003418	Cellular Locations Not Available	Organic oxygen compounds	Organooxygen compounds	Carbohydrates and carbohydrate conjugates	Monosaccharides
M179T482	(M-H)-	D-Tagatose	1.94294	0.455874	0.00790778	179.056	481.987	78378.2	59406.3	107813	102717	79635.8	51748.5	76859.8	17550	32056	11490.9	38013.2	42712.3	17422.7	17483.2	18501.3	C00795	HMDB0003418	Cellular Locations Not Available	Organic oxygen compounds	Organooxygen compounds	Carbohydrates and carbohydrate conjugates	Monosaccharides
M181T555	(M-H)-	D-Sorbitol	2.19727	0.310948	0.00963419	181.071	554.513	108825	41327.6	113569	79330.4	80088.5	19322.7	30605.1	12227.8	22550	18276.5	42416.5	11507.5	26502.7	27316.9	27313.3	C00794	HMDB0000247	Extracellular;Membrane	Organic oxygen compounds	Organooxygen compounds	Carbohydrates and carbohydrate conjugates	Sugar alcohols
M181T555	(M-H)-	D-Sorbitol	2.19727	0.310948	0.00963419	181.071	554.513	108825	41327.6	113569	79330.4	80088.5	19322.7	30605.1	12227.8	22550	18276.5	42416.5	11507.5	26502.7	27316.9	27313.3	C00794	HMDB0000247	Extracellular;Membrane	Organic oxygen compounds	Organooxygen compounds	Carbohydrates and carbohydrate conjugates	Sugar alcohols
M213T878	(M+H-H2O)+	D-Ribulose 5-phosphate	0.0400776	0.940129	0.718581	213.015	878.157	5994.43	6644.06	8858.88	3576.69	6920.87	6074.06	4897.92	4655.56	8562.23	4261.01	7990.53	5422.52	5944.25	5266.67	5298.37	C00199	HMDB0000618	Endoplasmic reticulum	Organic oxygen compounds	Organooxygen compounds	Carbohydrates and carbohydrate conjugates	Pentose phosphates
M230T711	M-	D-Ribulose 5-phosphate	0.272117	0.76389	0.291437	230.019	711.459	8642.24	10984.4	7677.53	4248.61	9009.54	3613.57	9599.24	4953.64	5318.3	3514.92	7479.65	2879.78	2712.51	1829.15	2688.63	C00199	HMDB0000618	Endoplasmic reticulum	Organic oxygen compounds	Organooxygen compounds	Carbohydrates and carbohydrate conjugates	Pentose phosphates
M369T945	(M+CH3COO)-	D-Ribulose 1,5-bisphosphate	0.0806583	0.878645	0.628474	369	945.24	1312.58	1847.24	757.929	693.004	1074.86	993.171	474.441	1926.16	652.065	997.812	1033.9	783.9	887.026	887.96	907.765	C01182
M289T855	(M+CH3COO)-	D-Ribose 5-phosphate	0.588673	0.733769	0.262355	289.032	855.03	33287	41279.7	40284.3	12370.1	26193.5	26435.7	17840	13764.1	44528.5	10070.5	27113.1	18652.4	10603.9	10604	10640.5	C00117	HMDB0001548	Cytoplasm;Mitochondria	Organic oxygen compounds	Organooxygen compounds	Carbohydrates and carbohydrate conjugates	Pentose phosphates
M149T366	(M-H)-	D-Ribose	0.171963	0.65232	0.0254299	149.045	365.582	1377.24	1687.17	1729.22	682.305	1480.36	1231.45	1025.29	666.826	1048.3	755.149	664.259	1181.2	844.488	793.318	844.298	C00121/C21057	HMDB0000283	Extracellular	Organic oxygen compounds	Organooxygen compounds	Carbohydrates and carbohydrate conjugates	Pentoses
M223T555	(M+CH3COO)-	D-Quinovose	0.0407226	0.882971	0.423573	223.08	555.265	2243.86	1213.12	1407.36	1286.38	1381.55	1503.8	1625.02	1456.28	1749.61	1329.02	877.261	941.413	1307.92	1172.83	1300.96	C02522
M116T631	(M+H)+	D-Proline	0.229426	0.903991	0.543175	116.07	630.95	18848.7	30614.6	28011.8	19187	22527	25209.6	19084.4	10384.1	23488.2	17696.9	30714.8	29166.6	13443.4	11326.3	13394.9	C00763	HMDB0003411	Extracellular;Lysosome;Peroxisome	Organic acids and derivatives	Carboxylic acids and derivatives	Amino acids, peptides, and analogues	Proline and derivatives
M130T1066	(M+H)+	D-Pipecolinic acid	1.07874	0.294291	0.0721689	130.085	1065.55	60048.5	9407.04	15279.3	14246.1	47365.4	10272.2	7952.34	5663.03	15108.1	725.29	5185.56	11457	4929.11	4987.89	4931.81
M136T600	(M+H-H2O)+	Dopamine	0.606077	0.528454	0.066184	136.075	599.702	16520.9	17787.6	8443.26	6324.15	6813.08	6392.61	4977.29	3370.16	8019.61	2520.6	8249.55	5775.72	3067.62	3067.61	3166.62	C03758	HMDB0000073	Cytoplasm;Extracellular	Benzenoids	Phenols	Benzenediols	Catecholamines and derivatives
M199T1324	(M-H)-	Dodecanoic acid	0.32162	1.37985	0.488476	199.17	1323.61	5423.48	3248.87	3679.11	2260.41	3389.33	3944.09	14332.7	2557.36	2896.02	4736.47	2951.08	2807.56	4055.79	4065.45	3835.09	C02679	HMDB0000638	Cytoplasm;Extracellular;Membrane (predicted from logP)	Lipids and lipid-like molecules	Fatty Acyls	Fatty acids and conjugates	Medium-chain fatty acids
M333T67	(M-H)-	Docosatrienoic Acid	0.493343	0.777177	0.364918	333.276	67.194	44937.6	32145.1	20999.3	8233.28	20476.3	24703.3	19837.1	14305.1	32837.7	16978	11264	22516.4	14373.5	14403.6	15098.1
M243T917_1	(M+H-H2O)+	D-Mannose-6-phosphate	1.27995	0.49973	0.0645147	243.026	917.402	50389.8	58290.8	52043.5	11598.4	111646	57284.8	26768.9	18485.5	43491.2	17849.2	36803	27137	23080.2	23042.1	21539.6	C00275	HMDB0001078	Cytoplasm (predicted from logP)	Organic oxygen compounds	Organooxygen compounds	Carbohydrates and carbohydrate conjugates	Hexose phosphates
M259T839	(M-H)-	D-Mannose 1-phosphate	3.38836	0.488345	0.124807	259.022	839.396	311232	538641	233856	40823.9	211759	121317	128202	86242.8	215909	63833.1	144492	73146.1	48663.3	49896.6	49893	C00636	HMDB0006330	Cytoplasm	Organic oxygen compounds	Organooxygen compounds	Carbohydrates and carbohydrate conjugates	Monosaccharide phosphates
M183T599	(M+H)+	D-Mannitol	0.632493	0.42184	0.0140841	183.084	599.084	12588.2	10261.6	5926.26	9432.45	6773.89	2929.39	2628	2137.19	4057.71	1997.33	6260.11	3130.76	2094.78	1905.87	2121.66	C00392	HMDB0000765	Extracellular;Membrane	Organic oxygen compounds	Organooxygen compounds	Carbohydrates and carbohydrate conjugates	Sugar alcohols
M149T618	(M-H)-	D-Lyxose	0.349745	0.344487	0.0628623	149.045	618.287	4513.75	459.836	1123.29	2718.06	3010.76	752.224	861.824	386.989	1056.86	627.464	1004.63	395.164	530.576	551.57	530.946	C00476
M104T689	(M-H)-	DL-Serine	1.49583	0.438692	0.0303413	104.035	689.225	62133	70404.3	28736.4	26555.1	42652.2	19398.1	14822.5	10234	35644.1	10818.1	20991.5	17109.9	5827.28	6028.26	5903.37	C00740/C00065	HMDB0003406/HMDB0000187/HMDB0062263	Cytoplasm;Extracellular;Mitochondria;Peroxisome	Organic acids and derivatives	Carboxylic acids and derivatives	Amino acids, peptides, and analogues	Serine and derivatives
M104T689	(M-H)-	DL-Serine	1.49583	0.438692	0.0303413	104.035	689.225	62133	70404.3	28736.4	26555.1	42652.2	19398.1	14822.5	10234	35644.1	10818.1	20991.5	17109.9	5827.28	6028.26	5903.37	C00740/C00065	HMDB0003406/HMDB0000187/HMDB0062263	Cytoplasm;Extracellular;Mitochondria;Peroxisome	Organic acids and derivatives	Carboxylic acids and derivatives	Amino acids, peptides, and analogues	Serine and derivatives
M89T414	(M-H)-	DL-lactate	6.41287	0.358325	0.146956	89.0241	414.457	431637	458509	283555	1.65659e+06	358678	149492	188522	174432	337303	105811	238121	152064	96841.1	98265.4	106778	C00256/C00186	HMDB0001311/HMDB0000190	Cytoplasm;Extracellular;Mitochondria	Organic acids and derivatives	Hydroxy acids and derivatives	Alpha hydroxy acids and derivatives	Alpha hydroxy acids and derivatives
M175T598	(M+H)+	DL-Arginine	0.4034	1.36902	0.262657	175.118	598.298	5045.56	2703.27	4989.62	4643.75	3805.88	7526.27	12162.4	6310.79	5251.62	3146.35	4167.29	8272.02	6792.57	7129.11	6790.81	C00062/C00792	HMDB0000517/HMDB0003416	Cytoplasm;Extracellular;Mitochondria;Peroxisome	Organic acids and derivatives	Carboxylic acids and derivatives	Amino acids, peptides, and analogues	L-alpha-amino acids;D-alpha-amino acids
M165T157	(M-H)-	DL-3-Phenyllactic acid	5.78222	0.276074	0.000925044	165.055	157.056	465656	290220	407897	441713	455129	155476	172579	64100.5	144281	41586.6	173338	15921.3	82522.5	90024.6	89730.8	C01479	HMDB0000779/HMDB0014712	Membrane	Phenylpropanoids and polyketides/Alkaloids and derivatives	Phenylpropanoic acids/Tropane alkaloids		Phenylpropanoic acids/Tropane alkaloids
M165T157	(M-H)-	DL-3-Phenyllactic acid	5.78222	0.276074	0.000925044	165.055	157.056	465656	290220	407897	441713	455129	155476	172579	64100.5	144281	41586.6	173338	15921.3	82522.5	90024.6	89730.8	C01479	HMDB0000779/HMDB0014712	Membrane	Phenylpropanoids and polyketides/Alkaloids and derivatives	Phenylpropanoic acids/Tropane alkaloids		Phenylpropanoic acids/Tropane alkaloids
M185T890	(M-H)-	DL-2-Phosphoglycerate	1.53721	1.31908	0.218938	184.985	889.636	33777.4	51482.4	45281.5	15630.7	61942.5	42742.1	62590	88857.6	57390.4	44096.8	38878.7	39086.7	30085.8	37375.1	37192.5	C00631	HMDB0003391	Cytoplasm (predicted from logP)	Organic oxygen compounds	Organooxygen compounds	Carbohydrates and carbohydrate conjugates	Sugar acids and derivatives
M160T753	(M-H)-	DL-2-Aminoadipic acid	0.335914	0.944236	0.814072	160.061	753.292	8038.58	9970.55	4621.46	3396.12	4566.99	3667.46	4513.96	6365.69	7840.03	4028.08	6577.27	3025.6	2480.97	2497.94	2624.94	C00956	HMDB0000510	Cytoplasm;Mitochondria
M129T191	(M-H2O-H)-	Dihydroxyfumarate	0.444206	1.0316	0.924549	129.055	190.942	41356.8	20477.7	23771.9	15533.8	14684.8	29813.5	22790.7	9387.25	21000.8	11556.1	54793.8	30712	9467.79	9482.6	10138	C00975	HMDB0002050	Cytoplasm (predicted from logP)	Organic acids and derivatives	Keto acids and derivatives	Short-chain keto acids and derivatives	Short-chain keto acids and derivatives
M169T833	(M-H)-	Dihydroxyacetone phosphate	0.551514	0.753126	0.348137	168.99	832.905	10377.3	8282.52	7486.53	20113.5	9942.62	4915.08	10213.8	3822.89	11369.4	6620.09	10278.6	3724.41	4965.6	4962.01	5657.79	C00111	HMDB0001473	Peroxisome	Organic oxygen compounds	Organooxygen compounds	Carbohydrates and carbohydrate conjugates	Monosaccharide phosphates
M113T530	(M-H)-	Dihydrouracil	0.457837	0.795187	0.696672	113.035	530.373	31040.3	10773.1	4043.71	3974.2	4356.03	4385.62	6316.68	19106.8	8144.22	3808.1	4288	4912.6	4134.54	4390.14	4770.02	C00429	HMDB0000076	Cytoplasm;Nucleus	Organoheterocyclic compounds	Diazines	Pyrimidines and pyrimidine derivatives	Pyrimidones
M351T921	(2M-H)-	D-Glucuronolactone	0.277745	1.30523	0.21309	351.05	920.724	1455.66	1828.57	1454.55	836.632	1560.42	1280.88	2253.55	1985.53	2950.29	1127.85	1089.68	1578.86	1068.18	1132.11	1192.04	C02670	HMDB0006355	Cytoplasm;Mitochondria;Endoplasmic reticulum	Organoheterocyclic compounds	Furofurans	Isosorbides	Isosorbides
M261T938	(M+H)+	D-Glucose 6-phosphate	0.691383	0.678065	0.124735	261.036	937.997	31895.8	37335.4	30166	7658.5	23047.3	18383.2	17055	13348.2	24322.9	12095.2	19489.1	14373.1	12922.3	12353.2	12331.5	C00092	HMDB0001401	Endoplasmic reticulum	Organic oxygen compounds	Organooxygen compounds	Carbohydrates and carbohydrate conjugates	Hexose phosphates
M258T771	(M-H)-	D-Glucosamine 1-phosphate (Glucosamine-1P)	0.742701	0.552182	0.0769641	258.038	771.129	22723.6	19888.2	11915.9	6127.65	11366.7	7529.65	8703.22	5054.32	11552.8	4607.94	9921.2	4087.57	3775.67	3782.23	3872.77	C06156
M177T480	(M-H)-	D-Glucono-1,5-lactone	0.103281	0.85418	0.605667	177.04	480.286	3689.76	5795.86	3905.06	5043.45	8908.16	2001.28	8127.57	4001.98	2790.59	2495.7	2192.92	5455.93	2245.87	2579.68	2578.72	C00198	HMDB0000150	Cytoplasm
M255T552	(M+CH3COO)-	D-gluconate	0.166348	1.09618	0.655527	255.071	551.579	982.141	473.119	831.428	1307.05	800.705	531.872	1048.25	747.45	727.578	611.17	858.189	1407.48	744.801	702.182	701.689	C00257	HMDB0000625	Cytoplasm (predicted from logP)	Organic oxygen compounds	Organooxygen compounds	Carbohydrates and carbohydrate conjugates	Sugar acids and derivatives
M193T714	(M-H)-	D-galacturonic acid	0.709814	0.68569	0.168813	193.035	713.698	46874.1	46855.8	18571.4	43097.7	46181.9	14186.3	26583.4	22527.5	44776.1	15489.6	16325.8	22247.1	11675.4	12027.4	12042.7	C00333
M323T1002	(M+H-H2O)+	D-Fructose 1,6-bisphosphate	0.2712	0.789419	0.588613	322.992	1002.12	7010.96	7609.17	3128.21	83.0774	2256.46	1667.56	1979.21	5635.37	2282.07	2816.33	1693.69	2767.5	1087.28	1220.79	1090.99	C00354
M339T943	(M-H)-	D-Fructose 1,6-bisphosphate	0.394747	0.645627	0.383029	338.987	943.041	11001.8	17122.5	4653.6	1867.54	3441.36	2721.58	3741.13	9169.03	4113.74	3015.45	3212.95	3094.7	1849.54	1890	1783.92	C00354
M367T36	(M+H-H2O)+	Desmosterol	3.6874	0.600217	0.0385244	367.336	36.321	800771	737825	421022	366593	434967	371286	311420	430208	343348	325940	319521	149721	356141	356209	372441	C01802	HMDB0002719	Extracellular;Membrane (predicted from logP);Endoplasmic reticulum	Lipids and lipid-like molecules	Steroids and steroid derivatives	Cholestane steroids	Cholesterols and derivatives
M199T831	(M-H)-	D-Erythrose 4-phosphate	0.593007	1.20782	0.446065	199.001	830.814	11156.1	9409.71	11693.6	3236.98	19129.8	6580.24	10734.6	9330.67	17356.2	9590.8	16800.1	10114.1	6960.51	8345.03	8383.6	C00279	HMDB0001321	Cytoplasm (predicted from logP)	Organic oxygen compounds	Organooxygen compounds	Carbohydrates and carbohydrate conjugates	Monosaccharide phosphates
M251T321	(M-H)-	Deoxyinosine	0.618117	1.30263	0.116918	251.078	320.765	7562.6	5916.93	5153.86	3076.77	4416.25	3446.78	6586.64	6844.84	5788.45	4248.82	8248.88	6805.43	3599.62	3587.26	3877.62	C05512	HMDB0000071	Cytoplasm;Extracellular;Nucleus	Nucleosides, nucleotides, and analogues	Purine nucleosides	Purine 2'-deoxyribonucleosides	Purine 2'-deoxyribonucleosides
M228T415	(M+H)+	Deoxycytidine	0.127984	0.884851	0.496873	228.097	414.897	20296.9	7352.55	12186.9	11948.9	12321	10631.6	8868.08	10871.2	14217.4	7497.57	13386.8	11290.7	6090.31	6090.48	6395.31	C00881	HMDB0000014	Extracellular;Mitochondria;Nucleus;Lysosome	Nucleosides, nucleotides, and analogues	Pyrimidine nucleosides	Pyrimidine 2'-deoxyribonucleosides	Pyrimidine 2'-deoxyribonucleosides
M226T370	(M-H)-	Deoxycytidine	0.170879	0.725472	0.415708	226.083	370.408	6655.55	558.793	3838.19	2052.7	3859.92	2449.87	2950.26	652.817	2193.62	2007	4953.8	1327.56	2091.1	2323.88	2094.7	C00881	HMDB0000014	Extracellular;Mitochondria;Nucleus;Lysosome	Nucleosides, nucleotides, and analogues	Pyrimidine nucleosides	Pyrimidine 2'-deoxyribonucleosides	Pyrimidine 2'-deoxyribonucleosides
M316T384	M+	Decanoyl-L-carnitine	0.347812	0.850594	0.665423	316.247	384.373	40367.5	10828.2	38492.3	6680.21	16406	10608.6	9591.27	27317.8	27458.6	12202.3	14876.4	13502.1	6824.88	6824.45	6730.42
M132T741	(M-H)-	D-Aspartic acid	0.96725	0.662334	0.245704	132.03	740.887	56727.3	68264.1	44991.5	13908.8	26604.3	17728.5	21184.9	15187.5	46101.7	13619.1	35258	19809.6	11552.5	11633.7	12438.2	C00402	HMDB0006483	Cytoplasm;Extracellular;Peroxisome	Organic acids and derivatives	Carboxylic acids and derivatives	Amino acids, peptides, and analogues	Aspartic acid and derivatives
M239T726	(M+CH3COO)-	D-(+)-Mannose	1.51239	0.890668	0.604806	239.077	726.468	252534	358086	180210	112575	165032	157205	190822	184391	277049	125209	149958	164210	91946.5	96292.3	96247.4	C00159	HMDB0000169	Cytoplasm;Extracellular;Lysosome;Endoplasmic reticulum;Golgi apparatus	Organic oxygen compounds	Organooxygen compounds	Carbohydrates and carbohydrate conjugates	Hexoses
M112T415	(M+H)+	Cytosine	0.710682	0.637087	0.107665	112.05	415.05	46734.6	27005.6	26601	22898.9	23844.3	20421	15879	1194.37	29814.4	12042.4	23424.5	24360.9	10163.8	11134.1	11136.8	C00380	HMDB0000630	Extracellular	Organoheterocyclic compounds	Diazines	Pyrimidines and pyrimidine derivatives	Pyrimidones
M613T818	(M-H)-	Cytidine monophosphate N-acetylneuraminic acid	0.533989	1.05098	0.811343	613.138	817.887	9499.65	17703.4	10771.3	3569.2	10966.6	13766.6	9606.59	9097.63	16422.5	9344.33	10625.9	14558.5	6085	5987.35	6132.18	C00128	HMDB0001176	Cytoplasm;Nucleus;Golgi apparatus	Nucleosides, nucleotides, and analogues	Pyrimidine nucleotides	Pyrimidine nucleotide sugars	Pyrimidine nucleotide sugars
M324T905	(M+H)+	Cytidine 5'-monophosphate	0.174459	1.04892	0.805909	324.059	904.635	3451.62	6273.23	3689.44	1874.33	4530.7	4796.51	3213.57	3317.39	5774.13	3075.68	4702.43	5736.76	2128.89	2248.5	2126.9
M386T928	(M+H-H2O)+	Cytidine 5'-diphosphate (CDP)	0.124585	1.37115	0.395209	386.014	928.478	637.442	1657.29	1063.53	834.677	2655.89	1058.68	770.625	626.937	3442.15	1166.5	2597	2239.18	966.778	965.622	908.282	C00112	HMDB0001546	Mitochondria;Nucleus	Nucleosides, nucleotides, and analogues	Pyrimidine nucleotides	Pyrimidine ribonucleotides	Pyrimidine ribonucleoside diphosphates
M244T481	(M+H)+	Cytidine	0.585779	0.872604	0.550739	244.092	480.918	71792.3	64015.7	32797.1	26666.6	41216.9	31894.9	44464.1	19904.2	39700.8	36768.6	58663.7	34691.2	27643.1	27343.9	27045.3	C00475	HMDB0000089	Extracellular;Mitochondria;Nucleus;Lysosome	Nucleosides, nucleotides, and analogues	Pyrimidine nucleosides		Pyrimidine nucleosides
M242T430	(M-H)-	Cytidine	0.808401	0.868165	0.585395	242.078	429.72	86860.1	81123.7	47695.4	17406.8	47823.8	37271.3	38532.5	29625.7	70573.5	35570	47610	54322.1	19720.9	20305.7	20300.5	C00475	HMDB0000089	Extracellular;Mitochondria;Nucleus;Lysosome	Nucleosides, nucleotides, and analogues	Pyrimidine nucleosides		Pyrimidine nucleosides
M178T74	(M-H)-	Cyclohexylsulfamate	9.63983	0.24928	0.0600391	178.054	74.038	1.33346e+06	423216	431541	2.78953e+06	1.4807e+06	284556	395605	182850	146907	82080.5	399436	474019	196664	197266	203802
M178T74	(M-H)-	Cyclohexylsulfamate	9.63983	0.24928	0.0600391	178.054	74.038	1.33346e+06	423216	431541	2.78953e+06	1.4807e+06	284556	395605	182850	146907	82080.5	399436	474019	196664	197266	203802
M160T783	(M+CH3COO+2H)+	Cyclohexylamine	1.37455	1.33802	0.409744	160.133	783.439	67071.6	269101	211778	124128	108888	44586.6	94579.9	190052	200226	44966.4	262563	312216	70650	61439.9	58129.6	C00571	HMDB0031404	Cytoplasm;Extracellular	Organic nitrogen compounds	Organonitrogen compounds	Cyclohexylamines	Cyclohexylamines
M112T296	(M-H)-	Creatinine	0.361416	0.574481	0.385723	112.051	296.148	14558	2725.71	2405.92	4038.95	2330.88	1095.4	2028.01	1615.69	5326.57	1456.88	2593.35	2579.46	1165.28	1237.72	1163.19	C00791	HMDB0000562	Cytoplasm	Organic acids and derivatives	Carboxylic acids and derivatives	Amino acids, peptides, and analogues	Alpha amino acids and derivatives
M114T334	(M+H)+	Creatinine	4.94228	0.467862	0.125306	114.065	333.774	1.0477e+06	326222	285092	1.41097e+06	623909	220940	226753	242936	623434	164458	304814	269206	96755.4	100751	100749	C00791	HMDB0000562	Cytoplasm	Organic acids and derivatives	Carboxylic acids and derivatives	Amino acids, peptides, and analogues	Alpha amino acids and derivatives
M132T691	(M+H)+	Creatine	0.55388	0.699396	0.103967	132.075	691.196	33715	19097.9	15780.3	17384.6	17235.6	16465.5	16524.4	8612.36	15097.4	10643.4	21101.9	11723.6	11322.2	11507.9	11513.5	C00300	HMDB0000064	Cytoplasm;Extracellular;Mitochondria	Organic acids and derivatives	Carboxylic acids and derivatives	Amino acids, peptides, and analogues	Alpha amino acids and derivatives
M130T637	(M-H)-	Creatine	0.576946	0.659574	0.0225415	130.062	637.348	19255.8	23525.9	17052.5	14982	14673.2	15260.8	13088.1	10196.5	11782.6	5491.37	18226.2	10305.7	8624.81	9396.19	9381.57	C00300	HMDB0000064	Cytoplasm;Extracellular;Mitochondria	Organic acids and derivatives	Carboxylic acids and derivatives	Amino acids, peptides, and analogues	Alpha amino acids and derivatives
M191T920	(M-H)-	Citrate	3.46119	0.411596	0.013444	191.019	920.279	113476	282256	101707	285823	243183	131147	138693	69604.8	39814	75857.1	88223	64267.3	67694.9	67822.7	67697.2	C00158	HMDB0000094	Cytoplasm;Extracellular;Mitochondria	Organic acids and derivatives	Carboxylic acids and derivatives	Tricarboxylic acids and derivatives	Tricarboxylic acids and derivatives
M191T920	(M-H)-	Citrate	3.46119	0.411596	0.013444	191.019	920.279	113476	282256	101707	285823	243183	131147	138693	69604.8	39814	75857.1	88223	64267.3	67694.9	67822.7	67697.2	C00158	HMDB0000094	Cytoplasm;Extracellular;Mitochondria	Organic acids and derivatives	Carboxylic acids and derivatives	Tricarboxylic acids and derivatives	Tricarboxylic acids and derivatives
M129T820_2	(M-H)-	Citraconic acid	1.13539	0.539937	0.055627	129.019	819.573	39772	47486.1	27026.6	66260	45471	7096.96	24945.8	22304.3	20121.6	19553.8	20254.1	18686.7	15981.2	15981.6	16477.7	C02226	HMDB0000634	Extracellular;Membrane	Lipids and lipid-like molecules	Fatty Acyls	Fatty acids and conjugates	Methyl-branched fatty acids
M129T820_2	(M-H)-	Citraconic acid	1.13539	0.539937	0.055627	129.019	819.573	39772	47486.1	27026.6	66260	45471	7096.96	24945.8	22304.3	20121.6	19553.8	20254.1	18686.7	15981.2	15981.6	16477.7	C02226	HMDB0000634	Extracellular;Membrane	Lipids and lipid-like molecules	Fatty Acyls	Fatty acids and conjugates	Methyl-branched fatty acids
M173T820	(M-H)-	cis-Aconitate	1.43711	0.543081	0.059385	173.009	819.562	63116	81606.9	43102.3	109793	75982.6	12210.2	41391.9	35964.5	32547.9	33732.7	33179.8	32709.7	25517.3	26629.7	26628.9	C00417	HMDB0000072	Cytoplasm	Organic acids and derivatives	Carboxylic acids and derivatives	Tricarboxylic acids and derivatives	Tricarboxylic acids and derivatives
M173T820	(M-H)-	cis-Aconitate	1.43711	0.543081	0.059385	173.009	819.562	63116	81606.9	43102.3	109793	75982.6	12210.2	41391.9	35964.5	32547.9	33732.7	33179.8	32709.7	25517.3	26629.7	26628.9	C00417	HMDB0000072	Cytoplasm	Organic acids and derivatives	Carboxylic acids and derivatives	Tricarboxylic acids and derivatives	Tricarboxylic acids and derivatives
M253T75_2	(M-H)-	cis-9-Palmitoleic acid	7.07065	1.40256	0.0258156	253.217	74.746	412481	575945	724001	283003	674950	716561	736512	731935	792003	1.01535e+06	756544	718060	723868	744830	743737	C08362	HMDB0003229	Extracellular;Membrane (predicted from logP)	Lipids and lipid-like molecules	Fatty Acyls	Fatty acids and conjugates	Long-chain fatty acids
M253T75_2	(M-H)-	cis-9-Palmitoleic acid	7.07065	1.40256	0.0258156	253.217	74.746	412481	575945	724001	283003	674950	716561	736512	731935	792003	1.01535e+06	756544	718060	723868	744830	743737	C08362	HMDB0003229	Extracellular;Membrane (predicted from logP)	Lipids and lipid-like molecules	Fatty Acyls	Fatty acids and conjugates	Long-chain fatty acids
M104T533	M+	Choline	3.26242	0.813857	0.0927724	104.106	533.016	2.98786e+06	1.79441e+06	2.55345e+06	2.27392e+06	2.48326e+06	2.16694e+06	2.31426e+06	1.77342e+06	2.50151e+06	1.79847e+06	1.899e+06	1.31882e+06	1.72617e+06	1.79226e+06	1.79155e+06	C00114	HMDB0000097	Cytoplasm;Extracellular;Mitochondria;Nucleus;Endoplasmic reticulum;Golgi apparatus	Organic nitrogen compounds	Organonitrogen compounds	Quaternary ammonium salts	Cholines
M360T785	(M+NH4)+	Cellobiose	0.450765	0.758044	0.462143	360.149	784.744	15692.6	16511.9	16890.4	29518.7	12498.7	61018.8	29872.8	21728.2	12358.1	18473.2	11418.2	21471.6	20045.8	20040.1	20397.5	C00185	HMDB0000055	Cytoplasm;	Organic oxygen compounds	Organooxygen compounds	Carbohydrates and carbohydrate conjugates	O-glycosyl compounds
M143T1283	(M-H)-	Caprylic acid	0.299509	1.00569	0.978604	143.107	1283.04	3409.46	2782.34	3296.74	4440.7	5589.96	8904.59	6227.25	4396.74	4131.45	5016.18	4395.61	4418.31	5870.38	6900.98	6762.69	C06423	HMDB0000482/HMDB0062511	Cytoplasm;Extracellular;Membrane (predicted from logP)	Lipids and lipid-like molecules	Fatty Acyls	Fatty acids and conjugates	Medium-chain fatty acids
M171T79	(M-H)-	Capric acid	1.62547	0.322806	0.0513002	171.139	79.014	29790.6	31382.8	75525.8	99979.2	26247.2	11598.1	19354.3	17213.8	11334.5	13181.8	14851.7	12681.7	13662	15254.6	13593.8	C01571	HMDB0000511	Extracellular;Membrane (predicted from logP)	Lipids and lipid-like molecules	Fatty Acyls	Fatty acids and conjugates	Medium-chain fatty acids
M171T79	(M-H)-	Capric acid	1.62547	0.322806	0.0513002	171.139	79.014	29790.6	31382.8	75525.8	99979.2	26247.2	11598.1	19354.3	17213.8	11334.5	13181.8	14851.7	12681.7	13662	15254.6	13593.8	C01571	HMDB0000511	Extracellular;Membrane (predicted from logP)	Lipids and lipid-like molecules	Fatty Acyls	Fatty acids and conjugates	Medium-chain fatty acids
M195T68_1	(M+H)+	Caffeine	0.776101	1.20013	0.110302	195.087	67.786	14417.4	13650.2	11026.8	10150.1	9794.41	13486.4	13892.5	17528	12778.4	15389.3	10354.5	17097.1	14974	15181.1	15178.8	C07481	HMDB0001847	Cytoplasm (predicted from logP)	Organoheterocyclic compounds	Imidazopyrimidines	Purines and purine derivatives	Xanthines
M372T830	(M+K-2H)-	beta-Nicotinamide D-ribonucleotide	0.126314	0.882972	0.644319	372.009	830.274	6502.93	5921.29	6548.84	2452.26	6941.5	6328.7	6397.73	1954.42	10229.7	3320.12	5891.01	2842.19	2569.14	2836.81	2832.16	C00455	HMDB0000229	Cytoplasm;Mitochondria;Nucleus	Nucleosides, nucleotides, and analogues	Pyridine nucleotides	Nicotinamide nucleotides	Nicotinamide nucleotides
M102T746	(M+H)+	Betaine aldehyde	0.664056	0.677779	0.446882	102.09	745.77	49328.5	9850.13	13404	10946.6	19756.4	8709.73	17735.8	2113.76	28130.8	1871.41	17073.2	8983.09	10011.7	9968.74	9239.56	C00576	HMDB0001252	Cytoplasm;Mitochondria	Organic nitrogen compounds	Organonitrogen compounds	Quaternary ammonium salts	Tetraalkylammonium salts
M118T545	(M+H)+	Betaine	1.31865	0.817802	0.233028	118.086	544.702	340314	675025	429964	573836	456495	472966	360530	577553	321955	314956	288712	547663	394132	383349	383476	C00719	HMDB0000043/HMDB0059606	Cytoplasm;Extracellular;Mitochondria	Organic acids and derivatives	Carboxylic acids and derivatives	Amino acids, peptides, and analogues	Alpha amino acids
M297T833	(M+K-2H)-	Beta-D-Fructose 6-phosphate	0.32052	1.07503	0.798684	296.977	833.089	7701.58	8207.42	2286.67	3827.38	8707.48	3740.91	10917	5937.24	7537.08	5362.81	5254.94	2048.8	6229.19	6549.44	6538.91	C05345	HMDB0003971	Cytoplasm (predicted from logP)	Organic oxygen compounds	Organooxygen compounds	Carbohydrates and carbohydrate conjugates	Pentose phosphates
M243T901	(M+H-H2O)+	Beta-D-Fructose 2-phosphate	1.17995	0.483274	0.0662562	243.026	900.983	48666.9	55325.3	34767.5	5844.5	29251.4	18209.5	18346.5	12206.7	24255.5	9433.5	20819.5	7758.31	7488.19	7587.58	7588.22	C03267	HMDB0006800	Cellular Locations Not Available	Organic oxygen compounds	Organooxygen compounds	Carbohydrates and carbohydrate conjugates	C-glycosyl compounds
M304T899	(M+H)+	Arg-Glu	0.777593	0.226345	0.295228	304.161	899.202	2256.44	4553.2	2533.09	49235.3	2810.21	4350.91	1581.27	3468.79	1869.45	3488.28	1663.73	2808.18	1678.69	1728	1678.51
M246T842	(M+H)+	Arg-Ala	0.326718	0.527507	0.230546	246.155	842.257	2564.97	3063.51	1799.16	10442.8	1730.43	2769.04	1265.41	1646.99	2715.55	2579.49	1718.88	1873.95	1505.92	1373.11	1349.11
M327T86	(M+Na)+	Arachidonic Acid (peroxide free)	0.44671	0.697432	0.204716	327.231	86.16	28920.4	13909	22429.7	7345.74	15205.4	16799	16874.1	10165.2	8917.74	2867.33	18782.7	15350.8	7562.52	7358.14	7362.82	C00219	HMDB0001043/HMDB0060102	Cytoplasm;Extracellular;Membrane (predicted from logP);Endoplasmic reticulum	Lipids and lipid-like molecules	Fatty Acyls	Fatty acids and conjugates	Long-chain fatty acids
M303T177	(M-H)-	Arachidonic Acid (peroxide free)	1.18447	0.323666	0.130361	303.232	177.207	70806	19140.5	21110.3	14916.4	10289.6	8095.9	4641.6	4773.63	19579.9	4533.37	8483.12	4712.34	5148.85	5530.66	5206.91	C00219	HMDB0001043/HMDB0060102	Cytoplasm;Extracellular;Membrane (predicted from logP);Endoplasmic reticulum	Lipids and lipid-like molecules	Fatty Acyls	Fatty acids and conjugates	Long-chain fatty acids
M138T588	(M+H)+	Anthranilic acid (Vitamin L1)	0.503549	0.826345	0.585458	138.054	588.004	29283.9	23221.6	14873.8	42552.4	20384.9	15559.4	7013.58	25510.7	25562.2	12021.4	5269.08	45166.9	10791.3	15889	15885.7	C00108	HMDB0001123	Cytoplasm	Benzenoids	Benzene and substituted derivatives	Benzoic acids and derivatives	Aminobenzoic acids
M187T574	(M-H)-	alpha-N-Acetyl-L-glutamine	0.438586	0.55438	0.220334	187.072	574.178	4311.68	2030.54	1679.78	9210.77	3241.98	1717.6	1216.67	1433.43	3177.54	1222.71	3683.22	1569.43	3421.01	2554.89	3424.86
M281T906	(M+Na-2H)-	alpha-D-Glucose 1-phosphate	0.118997	0.716945	0.0472579	281.005	905.896	1150.05	2059.62	1613.43	1068.97	1665.71	1120.55	671.5	1268.65	1071.91	1056.12	1114.25	1039.45	1107.18	1107.37	1144.77	C00103	HMDB0001586	Cytoplasm (predicted from logP)	Organic oxygen compounds	Organooxygen compounds	Carbohydrates and carbohydrate conjugates	Monosaccharide phosphates
M521T938	(2M+H)+	alpha-D-Glucose 1-phosphate	0.70299	0.547137	0.127219	521.066	937.525	21388.5	26410.1	21050.5	1521.64	11719.6	9800.99	8094.22	4583.59	15768.9	3951.96	10641.7	7236.72	2977.93	2977.69	2898.23	C00103	HMDB0001586	Cytoplasm (predicted from logP)	Organic oxygen compounds	Organooxygen compounds	Carbohydrates and carbohydrate conjugates	Monosaccharide phosphates
M339T839	(M-H)-	Alpha-D-Glucose 1,6-bisphosphate	0.325643	0.660182	0.157047	338.988	838.62	6236	10483.6	5362.49	2477.4	7457.12	3613.97	3596.2	3038.66	6921.16	2770.16	3678.49	3518	1826.85	1825.47	1930.25	C01231	HMDB0003514	Cellular Locations Not Available	Organic oxygen compounds	Organooxygen compounds	Carbohydrates and carbohydrate conjugates	Hexose phosphates
M179T553	(M-H)-	Alpha-D-Glucose	2.06588	0.520339	0.320942	179.055	552.713	61529.4	41090.4	29286	249404	38300.3	41293	36572.1	39360.1	37426.9	32421	26134.6	67910.9	22623.2	22308.5	22620.6	C00267	HMDB0003345/HMDB0061922	Cytoplasm (predicted from logP)	Organic oxygen compounds	Organooxygen compounds	Carbohydrates and carbohydrate conjugates	Hexoses
M241T739	(M-H2O-H)-	alpha-D-Galactose 1-phosphate	1.48228	0.389181	0.0136744	241.011	738.719	51608.7	42812.4	22935.1	23498.7	27981.9	14832.2	17555.2	8794.2	18343.5	5686.47	17480.4	3620.64	7529.3	7666.06	7529.85	C00446	HMDB0000645	Cytoplasm (predicted from logP)	Organic oxygen compounds	Organooxygen compounds	Carbohydrates and carbohydrate conjugates	Monosaccharide phosphates
M241T739	(M-H2O-H)-	alpha-D-Galactose 1-phosphate	1.48228	0.389181	0.0136744	241.011	738.719	51608.7	42812.4	22935.1	23498.7	27981.9	14832.2	17555.2	8794.2	18343.5	5686.47	17480.4	3620.64	7529.3	7666.06	7529.85	C00446	HMDB0000645	Cytoplasm (predicted from logP)	Organic oxygen compounds	Organooxygen compounds	Carbohydrates and carbohydrate conjugates	Monosaccharide phosphates
M537T435	(2M+H)+	Allopurinol riboside	3.12835	0.442689	0.0612069	537.167	434.992	281385	456062	181234	97834.1	145393	138001	109197	139693	136899	52866.4	107790	29010	59470.9	58483.5	59466.8		HMDB0000481	Cytoplasm;	Nucleosides, nucleotides, and analogues	Pyrazolo[3,4-d]pyrimidine glycosides		Pyrazolo[3,4-d]pyrimidine glycosides
M159T364	(M+H)+	Allantoin	0.483075	0.707312	0.473217	159.05	364.435	11061.6	5229.42	3734.08	30935.6	12971.4	4363.48	7071.1	5108.83	14193.8	5160.92	5849.05	10922.6	4432.5	4745.51	4434.03	C01551	HMDB0000462	Cytoplasm	Organoheterocyclic compounds	Azoles	Imidazoles	Imidazoles
M157T324_2	(M-H)-	Allantoin	4.5661	0.508878	0.0885097	157.036	323.574	890762	504140	236254	747808	547647	168393	232711	190532	603368	124984	208034	215352	95788.7	96574.5	98270	C01551	HMDB0000462	Cytoplasm	Organoheterocyclic compounds	Azoles	Imidazoles	Imidazoles
M157T324_2	(M-H)-	Allantoin	4.5661	0.508878	0.0885097	157.036	323.574	890762	504140	236254	747808	547647	168393	232711	190532	603368	124984	208034	215352	95788.7	96574.5	98270	C01551	HMDB0000462	Cytoplasm	Organoheterocyclic compounds	Azoles	Imidazoles	Imidazoles
M422T410	(2M+NH4)+	Ala-Leu	0.605466	0.323406	0.000154087	422.302	409.803	6335.39	5136.08	3754.19	7655.03	5784.08	3934.43	1809.71	1876.57	2106.75	1413.72	2117.61	1218.4	2033.51	2030.82	2197.39
M464T990	(M+H)+	Adenylsuccinic acid	0.0623233	1.07942	0.642532	464.08	990.088	500.236	976.694	980.12	537.42	885.924	678.903	959.183	748.358	997.984	632.105	1064.88	518.86	1082.1	1082.09	1079.51	C03794	HMDB0000536/HMDB0059653	Cytoplasm	Nucleosides, nucleotides, and analogues	Purine nucleotides	Purine ribonucleotides	Purine ribonucleoside monophosphates
M348T869	(M+H)+	Adenosine monophosphate (AMP)	0.265275	0.84867	0.0897137	348.07	869.117	13979.1	11290.9	15612.2	16532.3	18045.8	18489.3	14516.9	11869.6	14123.9	15056.4	12823.1	11342.3	19653.7	17601.8	15586.6	C00020	HMDB0000045	Cytoplasm;Extracellular;Mitochondria;Nucleus;Lysosome;Endoplasmic reticulum;Golgi apparatus;Peroxisome	Nucleosides, nucleotides, and analogues	Purine nucleotides	Purine ribonucleotides	Purine ribonucleoside monophosphates
M346T788	(M-H)-	Adenosine monophosphate (AMP)	0.553599	0.460683	0.0316064	346.055	788.145	7153.24	9956.49	4892.94	2468.11	7677.31	3532.31	1954.17	2256.66	5512.05	1890.35	2885.12	1938.99	1730.3	1730.59	1756.47	C00020	HMDB0000045	Cytoplasm;Extracellular;Mitochondria;Nucleus;Lysosome;Endoplasmic reticulum;Golgi apparatus;Peroxisome	Nucleosides, nucleotides, and analogues	Purine nucleotides	Purine ribonucleotides	Purine ribonucleoside monophosphates
M508T966	(M+H)+	Adenosine 5'-triphosphate (ATP)	0.0697903	1.09711	0.77091	508.001	966.322	885.749	1961.97	2168.73	579.759	1515.54	1306.83	1165.98	1920.88	3275.35	1126.73	858.12	889.077	1762.17	1763.29	1699.27	C00002	HMDB0000538	Cytoplasm;Extracellular;Mitochondria;Nucleus;Endoplasmic reticulum;Peroxisome	Nucleosides, nucleotides, and analogues	Purine nucleotides	Purine ribonucleotides	Purine ribonucleoside triphosphates
M428T905	(M+H)+	Adenosine 5'-diphosphate (ADP)	0.293971	1.01095	0.96249	428.036	904.631	8700.1	12896.6	6704.53	4618.94	5925.17	6388.58	5766.11	4990.69	10130	7437.67	5121.15	12283.5	5857.93	5639.93	5644.84	C00008	HMDB0001341	Cytoplasm;Extracellular;Mitochondria;Nucleus;Endoplasmic reticulum;Peroxisome	Nucleosides, nucleotides, and analogues	Purine nucleotides	Purine ribonucleotides	Purine ribonucleoside diphosphates
M348T809	(M+H)+	Adenosine 3'-monophosphate	0.568125	1.18635	0.774339	348.07	808.829	20469.8	41044.6	9582.89	2198.6	6357.47	9442.81	3983.1	14418.1	7332.53	7729.61	19443.8	52791.9	5111.9	4986.76	5110.76	C01367	HMDB0003540	Cellular Locations Not Available	Nucleosides, nucleotides, and analogues	Ribonucleoside 3'-phosphates		Ribonucleoside 3'-phosphates
M346T747	(M-H)-	Adenosine 3'-monophosphate	0.607822	1.1634	0.756182	346.054	747.447	11072.6	23311	4132.98	1064.39	5390.94	4738.22	3383.19	9975.58	5909.3	6747.77	9752.48	22064.6	3337.52	3007.59	3287.01	C01367	HMDB0003540	Cellular Locations Not Available	Nucleosides, nucleotides, and analogues	Ribonucleoside 3'-phosphates		Ribonucleoside 3'-phosphates
M428T976	(M+H)+	Adenosine 3',5'-diphosphate (PAP)	0.277368	1.05424	0.905685	428.036	975.769	2196.74	3043.93	1958.35	929.172	2211.41	8048.75	1687.58	4430.34	2001.57	1923.89	2137.31	7205.07	2127.41	2318.5	2131.93	C00054	HMDB0000061	Golgi apparatus	Nucleosides, nucleotides, and analogues	Purine nucleotides	Purine ribonucleotides	Purine ribonucleoside 3',5'-bisphosphates
M268T338	(M+H)+	Adenosine	0.913742	0.840619	0.390797	268.103	338.476	202842	266700	296767	96258.8	232238	165729	145369	129194	254265	127632	238435	164734	131678	135114	135034	C00212	HMDB0000050	Extracellular;Mitochondria;Lysosome	Nucleosides, nucleotides, and analogues	Purine nucleosides		Purine nucleosides
M136T332	(M+H)+	Adenine	1.19733	0.349409	0.188359	136.061	332.205	9896.4	5404.64	5549.7	75775.9	11612.9	45497	9199.89	5956.27	7954.67	9033.29	10512.3	11060.6	7973.1	5925.05	7962.61	C00147	HMDB0000034	Cytoplasm;Extracellular;Nucleus;Lysosome
M134T283	(M-H)-	Adenine	0.7762	0.260218	0.123061	134.047	283.19	4306.05	1331.95	1924.38	17808.7	1393.37	11059.2	2006.76	2701.95	1673.71	1502.83	1650.01	307.139	1531.57	1477.59	1531.72	C00147	HMDB0000034	Cytoplasm;Extracellular;Nucleus;Lysosome
M116T549	(M-H)-	Acetylglycine	0.169579	0.795954	0.322066	116.035	549.157	4281.68	3430.7	3074.14	1422.28	2773.23	1827.23	2130.12	1336.55	3721.82	1805.54	2582.23	1803.14	1184.19	1325.03	1327.08	C02055	HMDB0000532	Cytoplasm;	Organic acids and derivatives	Carboxylic acids and derivatives	Amino acids, peptides, and analogues	N-acyl-alpha amino acids
M146T378	(M+H)+	Acetylcholine	0.416477	0.826979	0.742721	146.117	377.731	36608.9	15330.3	5660.91	6032.71	3178.46	2621.57	7365.86	1632.89	20823	7874.89	9089.8	10633.1	4138.08	4210.89	4139.57	C01996	HMDB0000895	Cytoplasm;Extracellular;Nucleus	Organic nitrogen compounds	Organonitrogen compounds	Quaternary ammonium salts	Acyl cholines
M204T611	(M+H)+	Acetylcarnitine	7.65582	0.537584	0.0426587	204.123	610.714	2.61345e+06	2.38848e+06	1.64202e+06	1.01389e+06	1.32849e+06	787966	1.03112e+06	885032	900167	938471	1.18344e+06	316269	1.19049e+06	1.20019e+06	1.20019e+06	C02571	HMDB0000201	Cytoplasm;Extracellular;Membrane;Mitochondria;Endoplasmic reticulum;Peroxisome	Lipids and lipid-like molecules	Fatty Acyls	Fatty acid esters	Acyl carnitines
M262T552	(M+CH3COO)-	Acetylcarnitine	0.637995	0.431932	0.027875	262.129	551.677	12817.4	10989	8435.99	4981.26	4465.62	2995.55	3193.86	3509.01	3439.39	3247.59	4343.62	1567.37	3370.18	3362.22	3480.32	C02571	HMDB0000201	Cytoplasm;Extracellular;Membrane;Mitochondria;Endoplasmic reticulum;Peroxisome	Lipids and lipid-like molecules	Fatty Acyls	Fatty acid esters	Acyl carnitines
M139T804	(M-H)-	Acetyl phosphate	0.886494	1.23485	0.390974	138.979	804.095	12472	22381.7	23665.3	3735.18	24332.9	11611.8	27661.2	14349.5	24386.5	13031.7	16378.4	25453.7	12803.7	14340.1	15211.8	C00227	HMDB0001494	Cellular Locations Not Available	Organic acids and derivatives	Organic phosphoric acids and derivatives	Phosphate esters	Acyl monophosphates
M180T57	(M-H)-	Acamprosate	0.308632	0.951213	0.737062	180.033	57.073	12999.1	13428.1	9977.02	5768.31	13056.3	10720.5	12821.3	8964.19	12143.7	12209.9	10125.1	6467.65	9525.56	9162.4	9530.07		HMDB0014797	Membrane;	Organic acids and derivatives	Organic sulfonic acids and derivatives	Organosulfonic acids and derivatives	Organosulfonic acids
M313T186	(M-H)-	9,10-DiHOME	0.609325	1.00711	0.972687	313.237	186.271	23652.3	23731.5	20103.8	18461	26220.3	5148.19	10816.5	21177.3	25834.9	13686.9	22259.4	24376.8	8245.44	8236.1	8943.84
M295T117	(M-H)-	9(S)-HODE	3.62306	1.33426	0.46882	295.227	117.216	257827	193666	148623	18011.4	100172	684088	339040	291022	280534	394596	149412	416547	187922	187755	159039
M333T360	(M-H)-	8-iso-Prostaglandin A2	0.283197	0.906678	0.851152	333.205	360.236	2163.8	891.101	1625.02	636.989	2717.1	9309.62	2056.05	1133.13	3980.06	2220.6	2363.9	3971.34	1242.81	1244.01	1308.93	C05953	HMDB0002752	Extracellular;Membrane (predicted from logP)	Lipids and lipid-like molecules	Fatty Acyls	Eicosanoids	Prostaglandins and related compounds
M337T918	(M+CH3COO+2H)+	6-Phospho-D-gluconate	0.114467	0.837168	0.633125	337.046	918.214	3458.29	2779.91	925.354	3339.7	515.214	1529.8	1958.27	2797.6	690.227	786.42	3320.16	952.32	3233.04	3232.9	3175.15	C00345	HMDB0001316	Endoplasmic reticulum	Organic oxygen compounds	Organooxygen compounds	Carbohydrates and carbohydrate conjugates	Monosaccharide phosphates
M275T912	(M-H)-	6-Phospho-D-gluconate	0.122094	0.753506	0.381565	275.017	911.981	3864.13	6482.08	1999.61	1420.99	3501.52	3007.8	2730.76	411.593	4540.34	2327.73	2153.4	3114.35	1685.74	1676.08	1274.89	C00345	HMDB0001316	Endoplasmic reticulum	Organic oxygen compounds	Organooxygen compounds	Carbohydrates and carbohydrate conjugates	Monosaccharide phosphates
M369T312	(M-H)-	6-Keto-PGF1a	1.40103	0.403891	0.0327911	369.227	312.461	27899.5	68786.3	52211.7	10850.5	34275.2	24467.2	14202.6	7863.33	14637.8	14225.3	13305.9	24011.2	13581.8	13405.3	16352.2
M369T312	(M-H)-	6-Keto-PGF1a	1.40103	0.403891	0.0327911	369.227	312.461	27899.5	68786.3	52211.7	10850.5	34275.2	24467.2	14202.6	7863.33	14637.8	14225.3	13305.9	24011.2	13581.8	13405.3	16352.2
M198T666	(M-2H+3Na)+	6-Aminocaproic acid	0.302457	0.698965	0.254129	198.052	666.407	6340.16	4110.48	6970.74	3015.44	2828.17	1921.5	4382.01	2218.78	2946.66	1028.16	5106.21	1922.66	1265.66	1621.29	1244.26
M199T621	(M-H2O-H)-	5-L-Glutamyl-L-alanine	0.508842	0.15312	0.338068	199.07	621.335	1268.01	27711.8	953.552	1103.8	457.14	516.138	280.491	1412.82	2271.87	488.995	258.571	188.697	287.775	287.77	280.605	C03740	HMDB0006248	Extracellular	Organic acids and derivatives	Carboxylic acids and derivatives	Amino acids, peptides, and analogues	Dipeptides
M190T462	(M-H)-	5-Hydroxyindoleacetate	0.498881	0.404641	0.0630315	190.05	461.819	5811.48	9656.91	2486.3	1418.31	2143.85	6067.1	2284.28	2408.8	1832.51	1942.19	810.741	1883.06	1125.71	1153.58	1022.84	C05635	HMDB0000763	Cytoplasm;Mitochondria	Organoheterocyclic compounds	Indoles and derivatives	Indolyl carboxylic acids and derivatives	Indole-3-acetic acid derivatives
M182T61	(M-H)-	4-Pyridoxic acid	1.31095	0.527239	0.255012	182.046	61.452	115463	56927.8	17478.2	66348.1	40418.8	9928.21	14602.3	15448.5	88141.8	6359.57	13003.8	24076.7	5267.63	5158	5155.19	C00847	HMDB0000017	Cytoplasm;Extracellular	Organoheterocyclic compounds	Pyridines and derivatives	Pyridinecarboxylic acids and derivatives	Pyridinecarboxylic acids
M361T51_1	(M+CH3COO+2H)+	4-Oxoretinol	0.189754	0.637709	0.153449	361.236	51.3615	9367.86	11482	1886.58	4485.47	11218.9	7274.72	7433.44	2817.71	2201.39	6631.76	5741.59	4327.27	3187.02	3238.61	3688.35	C16683	HMDB0012329	Extracellular;Membrane	Lipids and lipid-like molecules	Prenol lipids	Retinoids	Retinoids
M137T58	(M-H)-	4-Hydroxybenzoate	0.347317	1.01683	0.916787	137.024	57.58	6531.7	6011.29	6090.69	2135.38	4096.11	4110.67	5911.42	4690.66	5262.08	3668.23	5380.41	4550.78	4581.21	4843.49	4829.78	C00156	HMDB0000500	Cytoplasm;Mitochondria	Benzenoids	Benzene and substituted derivatives	Benzoic acids and derivatives	Hydroxybenzoic acid derivatives
M131T584	(M-H)-	3-Ureidopropionate	0.401337	0.341585	0.10902	131.046	583.586	4426.21	1936.81	605.511	5829.62	1363.15	657.819	256.385	820.521	2157.97	531.045	658.887	637.185	562.48	591.093	564.191	C02642	HMDB0000026/HMDB0062812	Cytoplasm	Organic acids and derivatives	Organic carbonic acids and derivatives	Ureas	Ureas
M244T804	(M+CH3COO)-	3-Phosphoserine	0.16795	0.905533	0.649306	244.022	803.607	1770.62	3444.91	2326.65	744.662	2012.09	1975.17	2674.1	1962.28	2016.28	1667.57	1146.99	1647.39	1312.36	1392.23	1312.85	C01005	HMDB0000272/HMDB0001721	Cytoplasm (predicted from logP)	Organic acids and derivatives	Carboxylic acids and derivatives	Amino acids, peptides, and analogues	L-alpha-amino acids/Alpha amino acids
M185T1124	(M-H)-	3-Phospho-D-glycerate	0.145738	1.06601	0.814126	184.986	1123.67	1212.25	464.92	1249.4	1113.65	457.673	882.527	1234.26	1422.01	277.167	1067	437.386	1297.75	1226.49	1242.13	980.27	C00197	HMDB0060180	Cellular Locations Not Available	Organic oxygen compounds	Organooxygen compounds	Carbohydrates and carbohydrate conjugates	Sugar acids and derivatives
M263T38	(M-H)-	3-Methoxy-4-Hydroxyphenylglycol Sulfate	1.40847	0.390829	0.0472443	263.022	37.704	70810.3	23750.1	14689.7	61356.5	37753.6	16116.2	21019.8	13624.9	15447	3353.89	14058.2	20228.1	6584.2	6873.48	6871.91		HMDB0003332	Cytoplasm;	Benzenoids	Phenols	Methoxyphenols	Methoxyphenols
M263T38	(M-H)-	3-Methoxy-4-Hydroxyphenylglycol Sulfate	1.40847	0.390829	0.0472443	263.022	37.704	70810.3	23750.1	14689.7	61356.5	37753.6	16116.2	21019.8	13624.9	15447	3353.89	14058.2	20228.1	6584.2	6873.48	6871.91		HMDB0003332	Cytoplasm;	Benzenoids	Phenols	Methoxyphenols	Methoxyphenols
M188T189	(M-H)-	3-Indolepropionic acid	0.450003	1.22395	0.553538	188.071	188.594	4912.76	8147.05	13528.3	10114.3	14236.4	4341.05	7535.41	5307.34	25163	10971.2	10285.3	8397.76	3352.6	3123.05	3347.6
M139T645	(M+Na-2H)-	3-Hydroxyisovaleric acid	0.249442	0.674607	0.188047	139.036	645.478	4109.51	3157.86	3341.63	1184.54	2213.04	1361.51	2790.86	1746.25	2208.5	739.746	2188.95	693.133	1597.48	1636.61	1667.81		HMDB0000754	Cytoplasm (predicted from logP);	Lipids and lipid-like molecules	Fatty Acyls	Fatty acids and conjugates	Hydroxy fatty acids
M153T39	(M-H2O-H)-	3-Dehydroshikimic acid	0.283816	1.16827	0.714192	153.019	38.705	5344.93	4976.66	1120.36	2618.51	3930.28	1420.28	2972.76	2155.69	9895.46	3195.3	1654.2	2803.84	2197.8	2194.58	1903.07
M141T644	(M-H2O-H)-	2-Oxoadipic acid	18.767	1.02419	0.860023	141.017	643.645	1.13038e+07	1.8055e+07	1.28613e+07	1.21092e+07	1.31678e+07	6.19902e+06	1.27352e+07	1.32829e+07	1.41871e+07	1.25743e+07	1.02702e+07	1.24292e+07	9.63074e+06	9.90172e+06	9.92879e+06	C00322	HMDB0000225	Mitochondria	Organic acids and derivatives	Keto acids and derivatives	Medium-chain keto acids and derivatives	Medium-chain keto acids and derivatives
M281T262	(M-H)-	2'-O-methylinosine	0.388772	1.01377	0.956196	281.089	261.868	8264.16	8078.73	4807.73	10541.5	5017.07	4373.1	5448.29	2819.46	10291.4	4073.23	10363.3	8652.41	3403.72	3428.97	3763.33
M364T875	(M-2H+3Na)+	2'-O-methylguanosine	0.347842	1.42297	0.537092	364.064	875.305	1839.21	7413.45	2027.36	2583.77	920.637	2549.01	2477.39	3209.09	1285.22	1190.26	4445.87	12057.1	2214.77	2214.84	2101.66
M258T324	(M+H)+	2'-O-methylcytidine	0.161612	0.780869	0.138352	258.115	324.318	2764.86	5015.12	2263.55	5009.52	4154.03	4210.51	3812.02	2514.37	3445.5	2313.95	3478.93	2721.28	2812.37	2977.71	2978.71
M296T351	(M-H)-	2-Methylguanosine	0.429961	0.606828	0.111325	296.099	350.769	9960.44	6620.45	2933.74	10262.2	7222.66	4626.49	3712.42	2240.01	8971.88	2257.91	3419.52	4658.08	1363.42	1088.6	1365.85		HMDB0005862	Cellular Locations Not Available	Nucleosides, nucleotides, and analogues	Purine nucleosides		Purine nucleosides
M298T395	(M+H)+	2-Methylguanosine	0.892602	0.50451	0.0636778	298.114	394.625	24491.9	23722.2	6510.65	38617.2	21740.6	17116.8	8816.36	5330.36	25509.1	6827.66	8217.04	11995.4	3837.86	4037.48	4035.26		HMDB0005862	Cellular Locations Not Available	Nucleosides, nucleotides, and analogues	Purine nucleosides		Purine nucleosides
M246T481	M+	2-Methylbutyroylcarnitine	1.2901	0.945239	0.922728	246.169	480.733	412121	99409.8	190773	174954	248741	3661.89	370976	16706.6	13049.1	2754	501938	162374	123803	121672	121673
M135T182	(M-H)-	2-Methylbenzoic acid	0.982894	1.20332	0.412192	135.045	182.468	1402.18	25313.5	36887.4	35651.7	25527.2	18614.4	25107.6	32057.5	37086.2	25565.6	24542.5	28192	14969.5	14514.5	14493.6
M117T246	(M-H)-	2-Methyl-3-hydroxybutyric acid	1.91111	0.492519	0.166293	117.055	246.308	176801	258413	46809.5	46154.4	87964.6	40246.8	77174.8	67399.8	41896.8	63668.9	34373.8	38770.1	34710.8	36328.9	36161.1		HMDB0000354	Cytoplasm (predicted from logP);	Lipids and lipid-like molecules	Fatty Acyls	Fatty acids and conjugates	Hydroxy fatty acids
M152T525	(M+H)+	2-Hydroxyadenine	0.47488	0.545648	0.0609637	152.056	525.357	9796.71	14767.5	6339.26	5202.14	5819.33	4796.49	3076.53	3797.6	6902.78	3110.73	4350.5	4255.34	2753.14	2646.85	2646.51		HMDB0000403	Cytoplasm;	Organoheterocyclic compounds	Imidazopyrimidines	Purines and purine derivatives	6-aminopurines
M227T203	(M-H)-	2'-Deoxyuridine	1.18791	0.576463	0.132298	227.067	202.693	99777.3	76498.1	34122.6	46624.9	23726.1	24535.7	18346.5	26760.1	39208.5	25485.6	41525.7	24659	17035.1	17600.1	17564.4	C00526	HMDB0000012	Extracellular;Mitochondria;Nucleus	Nucleosides, nucleotides, and analogues	Pyrimidine nucleosides	Pyrimidine 2'-deoxyribonucleosides	Pyrimidine 2'-deoxyribonucleosides
M389T915	(M+CH3CN+H)+	2'-Deoxyguanosine 5'-monophosphate (dGMP)	0.711764	0.469126	0.0949256	389.104	915.106	17115.9	25506.7	10542.8	2253.42	9201.35	9108.83	6223.86	2617.09	8449.95	3328.47	10704.1	3264.68	3131.51	3131.35	3216.2	C00362	HMDB0001044	Cytoplasm;Mitochondria;Lysosome	Nucleosides, nucleotides, and analogues	Purine nucleotides	Purine deoxyribonucleotides	Purine 2'-deoxyribonucleoside monophosphates
M277T887	(M-H)-	2-C-Methyl-D-erythritol 2,4-cyclodiphosphate	0.169091	0.764788	0.446268	276.988	886.503	2920.33	2362.01	1645.21	451.036	1316.48	511.699	886.766	727.482	2146.47	871.423	1131.26	1277.82	1069.23	918.469	1069.94
M365T38	(M+H-2H2O)+	25-hydroxyvitamin D3	1.11514	0.679324	0.106458	365.32	38.072	91613	101970	48169.7	39593.6	67295.6	39941.6	43133.9	55367.4	54073.2	40008.8	42390.2	29000.9	40279.9	40015.1	39532.3	C01561	HMDB0003550	Cytoplasm;Extracellular;Membrane (predicted from logP);Mitochondria	Lipids and lipid-like molecules	Steroids and steroid derivatives	Vitamin D and derivatives	Vitamin D and derivatives
M369T270	(M-H)-	20-hydroxy-PGF2a	0.5797	0.811298	0.555887	369.226	270.165	101646	42431.2	38497.8	21803.6	39666.3	74967.7	41874.7	23971.9	33408.1	28840.5	32528.2	98190.6	30695.2	31145.3	26043.5
M303T74	(M+H-H2O)+	20-Hydroxyarachidonic acid	1.35654	0.992059	0.959574	303.232	73.781	574062	560395	856170	314210	673693	688131	783105	500241	741897	423185	545488	643629	409539	409528	411698
M194T906	M+	2,5-Dihydroxycinnamic acid methyl ester	0.619425	0.37782	0.104611	194.057	905.863	6558.79	10438.6	6921.78	25520.2	4127.4	4060.49	4499.26	4165.5	4869.56	2860.53	2964.78	2413.03	26150.8	26090.5	4796.2		HMDB0061686	Cellular Locations Not Available	Phenylpropanoids and polyketides	Cinnamic acids and derivatives	Hydroxycinnamic acids and derivatives	Hydroxycinnamic acids
M133T185	(M-H)-	2,3-Dihydroxy-3-methylbutyric acid	1.29801	0.15117	0.0654608	133.051	184.704	23138.8	8023.83	6875.28	50387.8	10968.1	4808.91	1452.95	1804	2511.24	2900.06	3112.61	3971.48	2142.43	2123.67	1129.93	C04272	HMDB0012141	Cellular Locations Not Available	Lipids and lipid-like molecules	Fatty Acyls	Fatty acids and conjugates	Hydroxy fatty acids
M133T185	(M-H)-	2,3-Dihydroxy-3-methylbutyric acid	1.29801	0.15117	0.0654608	133.051	184.704	23138.8	8023.83	6875.28	50387.8	10968.1	4808.91	1452.95	1804	2511.24	2900.06	3112.61	3971.48	2142.43	2123.67	1129.93	C04272	HMDB0012141	Cellular Locations Not Available	Lipids and lipid-like molecules	Fatty Acyls	Fatty acids and conjugates	Hydroxy fatty acids
M524T1222	(M+H)+	1-Stearoyl-sn-glycerol 3-phosphocholine	0.0449328	1.00789	0.984356	524.37	1221.9	590.066	3279.01	941.171	1339.45	942.213	1300.14	1291.68	399.234	2788.5	700.215	2304.33	974.347	1136.73	991.749	949.317
M341T399	(M+H-H2O)+	1-Stearoyl-sn-glycerol	1.49046	0.400292	0.0575177	341.304	398.808	14555.1	15914.6	40461.7	24733.1	69484.3	62995.7	9578.49	4422.64	25606.6	4359.74	27959.2	19397.8	5994.89	6256.31	6241.19
M341T382	(M+H-H2O)+	1-Stearoyl-rac-glycerol	0.789481	1.36376	0.304649	341.304	381.784	17981.1	20608.9	16137.5	15679	15956.7	21372.5	53955.9	20991	20557.5	15791.6	18624.2	17005.7	18726	24165.1	19181.9
M524T387_4	(M+H)+	1-Stearoyl-2-hydroxy-sn-glycero-3-phosphocholine	28.4278	0.447789	0.065713	524.37	387.175	5.32713e+06	5.2024e+06	1.91275e+07	1.05923e+07	1.80841e+07	2.00604e+07	3.00031e+06	2.49473e+06	1.1699e+07	1.29334e+06	1.28201e+07	3.79638e+06	1.49712e+06	1.59194e+06	1.58934e+06
M628T393	(M+H-H2O)+	1-Stearoyl-2-arachidonoyl-sn-glycerol	0.310083	0.850419	0.567626	627.533	393.241	46683.8	34119.3	14333.5	18250.4	37668.9	26711.9	10641.5	25129.2	17869.6	23664.2	22870.1	51002.5	18327.7	22401.3	18235.4	C00165	HMDB0007098/HMDB0007099/HMDB0007100/HMDB0007101/HMDB0007103/HMDB0007108/HMDB0007112/HMDB0007131/HMDB0007132/HMDB0007156/HMDB0007166/HMDB0007170/HMDB0007223/HMDB0007224/HMDB0007248/HMDB0007257/HMDB0007398	Extracellular;Membrane	Lipids and lipid-like molecules	Glycerolipids/Fatty Acyls	Diradylglycerols/Lineolic acids and derivatives	1,2-diacylglycerols/Lineolic acids and derivatives
M496T376	(M+H)+	1-Palmitoyl-sn-glycero-3-phosphocholine	9.29467	0.969413	0.954044	496.339	376.107	4.08368e+06	3.52376e+06	679546	354758	923096	420996	3.26194e+06	3.01352e+06	563181	1.78875e+06	515265	537734	2.45605e+06	2.4561e+06	2.4413e+06
M497T377_2	(M+H)+	1-Palmitoyllysophosphatidylcholine	4.8138	0.789168	0.69671	497.342	377.345	1.02946e+06	1.83516e+06	224019	118061	247544	139345	840663	753925	178702	726348	190122	146187	646614	641120	641122
M313T47	(M+H-H2O)+	1-Palmitoylglycerol	0.89129	0.719645	0.291001	313.273	47.177	191756	206512	43689.7	138764	72176.7	73677.6	60347.4	121320	53631.4	96842.6	121341	69394.1	127658	127554	112303
M748T75	(M-H)-	1-Palmitoyl-2-oleoyl-phosphatidylglycerol	0.445304	0.769962	0.342729	747.516	74.699	76956.8	38130.9	50988.3	80323.7	18486.9	50319.8	9448.7	56059.3	31782.7	46687.6	59264.4	39454.1	58428.8	56117.9	55997.3
M454T405	(M+H)+	1-Palmitoyl-2-hydroxy-sn-glycero-3-phosphoethanolamine	3.23892	0.570944	0.260404	454.292	405.013	51851.4	54120	276661	206015	337081	254880	50036.7	5611.17	271380	6784.86	272513	67735.7	55229.2	66144.7	55234.6
M452T329	(M-H)-	1-Palmitoyl-2-hydroxy-sn-glycero-3-phosphoethanolamine	3.03863	0.207125	0.108815	452.277	329.239	291618	276003	42096	17357	49743.6	28872.7	28313.8	18971.7	38957.5	17925.4	32242.6	9754.57	15649	1733.14	15371
M409T437	(M-H)-	1-Palmitoyl Lysophosphatidic Acid	0.227828	0.65947	0.101018	409.234	437.382	1975.42	4589.25	2635.15	1658.33	2335.16	2026.26	1565.86	1859.62	2310.31	1340.79	2033.86	926.422	1455.23	1456.75	1488.43
M510T394	(M+H)+	1-O-Octadecyl-sn-glyceryl-3-phosphorylcholine	1.73965	0.436992	0.0527956	510.39	394.148	15592.9	34590.9	92122	64763.3	57851.1	39792.5	9864.57	11710.2	27831.2	1430.22	46897.9	35423	6838.49	7337.44	7323.63
M522T349	(M+H)+	1-Oleoyl-sn-glycero-3-phosphocholine	6.64963	0.0684606	0.248029	522.354	349.104	3.52899e+06	997233	8514.09	4243.63	12069.8	10588.1	163552	57862	6828.65	70446.4	11150.8	2452.77	91399.5	91356.5	97998.3
M419T489	(M+H-H2O)+	1-Oleoyl-L-.alpha.-lysophosphatidic acid	0.32498	0.616803	0.170164	419.255	488.562	3227.01	8514.11	5730.62	9323.18	4729.53	2484.44	4626.04	7153.03	3299.07	1800.67	3563.41	534.551	2846.75	2846.7	2907.18
M435T430	(M-H)-	1-Oleoyl-L-.alpha.-lysophosphatidic acid	0.738833	0.519748	0.306211	435.25	429.764	5316.34	75500.5	14063.7	15024.4	24718.8	12764.5	16380.7	22451.6	17094.2	7304.57	11971.7	1401.86	10199.3	9032.47	10056.8
M595T353	(M-H+2Na)+	1-O-(cis-9-Octadecenyl)-2-O-acetyl-sn-glycero-3-phosphocholine	0.403094	0.893122	0.699842	595.37	352.937	32011.3	16712.4	14054.6	6874.54	13429.5	12241.2	9814.09	21189.4	14647	21524.7	6942.61	11017.8	9783.35	8732.65	8468.66
M468T402	(M+H)+	1-Myristoyl-sn-glycero-3-phosphocholine	1.83086	0.486169	0.211551	468.308	401.557	30687.5	37906.6	190543	35948.4	142627	56316.6	16325.1	1118.21	71998.3	1505.92	87898.3	61336.1	7774.61	7827.35	7826.41
M126T669	(M+H)+	1-Methylhistamine	0.183446	0.790412	0.448773	126.101	669.346	4164.85	930.551	2982.22	2480.39	2028.17	2858.6	1829.15	1002.99	2797.17	555.255	4124.74	1898.45	1172.76	1289.96	1162.58	C05127	HMDB0000898	Cytoplasm	Organic nitrogen compounds	Organonitrogen compounds	Amines	2-arylethylamines
M504T398	(M+H)+	1-Eicosatrienoyl-sn-glycero-3-phosphoethanolamine	1.31633	0.634153	0.235357	504.304	398.45	20205.8	24999.7	52954	38511.6	77579.7	68632.6	18671.6	5320.68	44091	6525.31	66464.8	38318	13672.9	15032.9	14802.9
M224T566	(M+CH3COO+2H)+	1-Deoxynojirimycin	0.48283	0.512001	0.447411	224.112	565.613	6696.43	3794.75	4662.14	1946.62	8667.79	53062.2	7293.86	3186.98	10774.6	6661.3	5114.49	7329.8	3828.28	4069.89	3827.66	C16843	HMDB0035359	Cytoplasm;Extracellular	Organoheterocyclic compounds	Piperidines		Piperidines
M84T792	(M+H-H2O)+	1-Aminocyclopropanecarboxylic acid	0.150639	0.848118	0.269168	84.0433	791.751	12384.3	14104.9	10005.5	8268.41	7894.79	7748.54	7782.37	6157.45	11240.3	7388.71	9579.36	9083.7	4765.88	4892.89	4765.22	C01234	HMDB0036458	Cytoplasm;Extracellular	Organic acids and derivatives	Carboxylic acids and derivatives	Amino acids, peptides, and analogues	Alpha amino acids
M295T75	(M+Na)+	16-Hydroxypalmitic acid	1.7933	1.11237	0.685194	295.226	74.605	137659	119067	68732.8	25915.9	90201.3	171413	99776	110402	67727.6	130333	83842.3	189789	80387.3	79565.2	80388.7	C18218	HMDB0006294	Cytoplasm;Extracellular;Membrane	Lipids and lipid-like molecules	Fatty Acyls	Fatty acids and conjugates	Long-chain fatty acids
M349T80	(M-H)-	15-keto-Prostaglandin E2	0.891152	1.24016	0.325205	349.2	79.644	22580.9	19662.8	15661.2	2931.27	9912.99	24160.3	17191.5	13106.7	21578	20950.2	21104.5	23772.1	12366.8	12095.7	12091.2
M315T180	(M-H)-	15-Deoxy-delta-12,14-PGJ2	1.31113	0.736703	0.493223	315.196	180.448	192714	49361.3	208149	111421	199825	251340	110106	55416	385417	31545	128582	35074.4	30498.5	29032.5	31813.8	C14717	HMDB0005079	Extracellular;Membrane	Lipids and lipid-like molecules	Fatty Acyls	Eicosanoids	Prostaglandins and related compounds
M293T110	(M-H)-	13-OxoODE	0.766441	1.10036	0.734525	293.211	109.94	20477.9	18642.7	16024.2	919.75	24881.9	30244	13015.5	10265.3	28784.8	24305.3	15941.3	30037.3	11246.4	11700.3	11252.5
M335T181	(M+H)+	13,14-Dihydro-15-ketoprostaglandin A2	0.839205	0.738615	0.556998	335.221	180.991	40048.9	37075.1	102182	25102.8	237677	82656.9	102212	51373.8	132890	8849.85	24423.1	67833.3	40967	44575.3	44580.7
M353T71	(M+H)+	13,14-Dihydro-15-keto-PGE2	0.375554	0.719742	0.507546	353.232	70.658	8822.99	8754.62	8118.71	4909.55	6511.62	32551.1	1108.59	7256.55	16748.7	8211.11	6074.99	10743.4	5475.88	5610.89	4832.46	C04671	HMDB0002776/HMDB0012481	Extracellular;Membrane (predicted from logP);Membrane	Lipids and lipid-like molecules	Fatty Acyls	Eicosanoids	Prostaglandins and related compounds
M301T51	(M+H-H2O)+	12-oxo-ETE	0.224951	0.768613	0.25603	301.215	51.285	32340.2	37693.1	21977.6	6704.3	27702.1	20724.4	18834.7	15561.6	16289.5	18804	16922.6	26682.6	11062.6	11790	11058.6
M149T49	(M+H-H2O)+	1,2-Benzenedicarboxylic acid	0.652319	0.70934	0.215693	149.022	49.428	86316.6	54585	28960.3	44106.8	26634.2	28736.6	28599.4	46219.9	31849	30135.3	26913.4	27336.1	34206.3	31949.4	31830.4
M165T549	(M-H)-	1,2-Benzenedicarboxylic acid	2.77818	0.0142235	0.182025	165.019	548.997	355816	161964	1561.76	859.999	905.972	1172.8	2940.21	1094.26	766.73	830.865	628.378	1168.24	903.025	900.864	978.763
M276T909	(M+H)+	.gamma.-L-Glu-.epsilon.-L-Lys	0.456484	0.53083	0.0868381	276.155	908.582	5986.48	11203.3	5481.01	18749.9	6289.09	6538.72	3417.91	4388.39	3657.57	6125.81	3534.17	7672.85	3676.76	3676.67	3833.05
M147T723_2	(M-H)-	(S)-2-Hydroxyglutarate	3.70063	0.361334	0.0106686	147.03	723.211	142298	205462	104153	315443	171733	99424.4	67038.6	58072.3	91926.3	37761.6	101585	18865.4	33762.4	36335.4	36240.4	C03196	HMDB0000694	Cytoplasm (predicted from logP);Mitochondria	Organic acids and derivatives	Hydroxy acids and derivatives	Short-chain hydroxy acids and derivatives	Short-chain hydroxy acids and derivatives
M147T723_2	(M-H)-	(S)-2-Hydroxyglutarate	3.70063	0.361334	0.0106686	147.03	723.211	142298	205462	104153	315443	171733	99424.4	67038.6	58072.3	91926.3	37761.6	101585	18865.4	33762.4	36335.4	36240.4	C03196	HMDB0000694	Cytoplasm (predicted from logP);Mitochondria	Organic acids and derivatives	Hydroxy acids and derivatives	Short-chain hydroxy acids and derivatives	Short-chain hydroxy acids and derivatives
M327T70_4	(M-H)-	(4Z,7Z,10Z,13Z,16Z,19Z)-4,7,10,13,1 6,19-Docosahexaenoic acid	9.76988	0.716331	0.0887619	327.232	70.337	6.98372e+06	7.71872e+06	6.96605e+06	4.37986e+06	6.53283e+06	4.56816e+06	5.34579e+06	3.49409e+06	6.22542e+06	3.2314e+06	6.38464e+06	1.92988e+06	3.87476e+06	3.88185e+06	4.00117e+06	C06429	HMDB0002183	Cytoplasm;Extracellular;Membrane	Lipids and lipid-like molecules	Fatty Acyls	Fatty acids and conjugates	Very long-chain fatty acids
M327T70_4	(M-H)-	(4Z,7Z,10Z,13Z,16Z,19Z)-4,7,10,13,1 6,19-Docosahexaenoic acid	9.76988	0.716331	0.0887619	327.232	70.337	6.98372e+06	7.71872e+06	6.96605e+06	4.37986e+06	6.53283e+06	4.56816e+06	5.34579e+06	3.49409e+06	6.22542e+06	3.2314e+06	6.38464e+06	1.92988e+06	3.87476e+06	3.88185e+06	4.00117e+06	C06429	HMDB0002183	Cytoplasm;Extracellular;Membrane	Lipids and lipid-like molecules	Fatty Acyls	Fatty acids and conjugates	Very long-chain fatty acids
M146T749	M+	(3-Carboxypropyl)trimethylammonium cation	1.02588	0.857956	0.137905	146.117	748.548	805773	543114	711032	602985	699488	618809	614602	541970	553556	530078	750940	424551	665228	665410	677861
M319T78_1	(M-H)-	(+-)12-HETE	5.8153	1.13828	0.526421	319.227	78.029	743229	771024	1.80984e+06	459081	1.28416e+06	1.46039e+06	1.47947e+06	941945	1.53019e+06	1.12204e+06	1.10374e+06	1.25299e+06	797306	816315	816316
M231T362			0.406575	1.49944	0.310638	231.044	361.8	2453.19	2588.91	1483.98	3691.1	2909.7	810.135	1133.19	1814.3	3895.23	3506.3	8032.04	2516.65	3891.36	3791.67	3956.7
M536T74			0.410908	1.49921	0.020765	536.472	74.101	1753.85	1545.06	2305.06	534.715	1204.45	1897.28	1753.09	2414.48	2688.36	2277.74	2302.5	2417.18	2005.48	2005.55	2127.33
M682T78_1			0.382944	1.49863	0.192964	682.368	78.001	1501.81	1583.5	2090.72	1878.56	1107.05	2341.54	1316.14	1752.43	2096.86	5363.25	2109.39	3102.26	1903.96	1861.14	2175.51
M310T50			0.301967	1.49843	0.165983	310.243	49.848	3705.86	2876.88	1623.97	961.851	2454.47	1503.77	1585.36	5414.37	4462.84	2196.82	3591.32	2418.85	3145.99	3538.96	3548.58
M659T868			0.335149	1.49824	0.0540124	659.052	867.909	1090.38	1450.32	1883.1	1609.26	1074.96	1081.92	2498.6	2765.29	2616.53	1760.39	1578.77	1050.89	1587.48	1572.55	1572.92
M304T931			0.236319	1.49778	0.21402	304.03	931.449	1802.11	4197.33	2345.28	953.674	976.658	2818.2	3222.94	1194.81	5435.63	1962.28	4607.52	3187.64	1075.93	1255.62	1095.2
M808T79_4			0.532016	1.49736	0.16882	808.056	78.849	5264.76	3080.81	3995.77	5423.91	8607.09	2248.05	5011.61	4344.57	6786.13	6742.96	6613.95	13355.8	5698.82	3752.93	5718.33
M283T294			0.431968	1.497	0.311979	283.266	293.988	1204.99	6259.57	1624.58	2710.22	1119.97	2714.78	3026.83	2857.94	6919.93	2166.94	1798.28	6634.41	2635.24	2534.76	2636.49
M366T548			0.743587	1.49644	0.362276	366.107	548.077	2475.39	2521.67	2042.97	15288.9	4773.28	7124.55	9841.52	6987.72	6464.8	7530.79	2438.3	17955.3	2472.6	2473.96	2612.38
M398T339			0.42329	1.49535	0.356527	398.325	339.137	9636.16	6281.98	4949.4	7812.4	19226.1	20539.2	11165.3	10960.7	42762.2	13367	12360.6	11733.6	6832.98	7519.5	6853.15
M631T830			0.284346	1.49474	0.180081	630.816	830.457	1475.74	902.807	773.057	919.589	1595.91	430.774	355.357	1772	2390.11	2107.29	1303.32	1186.66	1302.74	1304.19	1091.7
M254T517			0.503704	1.49466	0.0898819	254.135	516.838	5431.66	6709.43	4749.78	1144.75	2689.29	3047.25	4103.57	7301.67	6466.09	4094.26	5878.48	7687.24	2983.08	2962.18	2966.31
M139T368			0.222005	1.49429	0.100799	138.889	367.799	512.178	148.756	782.299	808.267	458.973	1218.21	913.319	632.733	1167.96	1325.5	945.224	885.862	1003.53	1105.92	1023.72
M831T78_1			2.01585	1.4942	0.0822505	830.567	78.1515	83532	60721.6	49852.6	31942.8	58965.7	53103.3	59524.9	63465	97157.3	85634.6	60129.6	139304	48206.9	48218.9	49092.3
M496T76_2			0.47506	1.49411	0.0765287	496.317	76.006	1614.38	2167.24	3480.98	2027.89	5207.53	1661.64	3570.56	3718.23	5279.61	4219.53	4567.18	2789.26	3911.88	3892.68	3892.57
M203T361			0.731964	1.49356	0.165284	203.049	361.226	5566.89	10244.4	6043.29	1502.86	4531.56	4876.74	8763.2	12992.1	6022.51	10761	3686.8	6712.02	5663.35	5661.91	5756.19
M1073T773			0.417785	1.49313	0.128044	1073.38	772.56	1156.26	1835.88	4515.11	2542.73	4491.84	1888.03	3703.8	6299.4	3610.26	3738.95	2234.49	4945.08	3965.7	3953.15	2947.3
M500T777			0.270346	1.49305	0.0792981	500.098	776.973	326.501	942.728	1286.13	1156.51	1083.23	779.913	1042.28	2025.24	1106.23	1515.27	853.482	1781.29	765.629	877.124	685.086
M725T413			0.695497	1.49225	0.0509018	724.568	413.389	4465.35	3928.21	6742.9	6581.38	11947.6	6537.6	12919.3	9639.45	7583.93	10428.1	7337.19	12085.1	11662.7	11596.1	12707.1
M386T65			0.27161	1.49223	0.274095	386.316	64.682	1922.97	881.239	1141.14	1329.05	1015.17	942.364	1096.94	878.377	4101.25	1407.34	1263.31	2044.5	1092.51	1018.84	1091.87
M772T306			0.577748	1.49208	0.123603	771.567	306.04	7236.71	1817.62	6857.82	7325.37	7264.9	8368.66	4779.2	13055	12423	6002.11	7613.44	14126.1	9083.94	8289.27	9300.4
M362T69			1.91689	1.49199	0.173795	362.236	69.005	50422.4	65556.6	28292.6	6251.59	32529.4	35271.9	52851.7	31736.4	29007.1	72322.2	54376.5	85443.4	41164.4	50677.5	50638.5
M154T367			0.327381	1.49188	0.0446078	153.868	366.676	914.081	565.628	1307.58	1350.35	1799.12	1633.96	2654.31	2212.9	1436.91	1535.33	1926.13	1529.05	2160.96	2077.94	2161.28
M281T830			0.430407	1.49165	0.0218321	280.948	829.74	2051.85	1781	1090.06	913.149	2580.93	1851.61	2648.52	1993.9	2537.28	2625.16	2228.46	3283.78	1957.43	2086.45	2024.37
M185T73_1			0.304573	1.4914	0.0444925	185.094	73.037	1272.15	1931.14	2775.92	1043.29	1482	1816.35	2755.51	1852.26	3474.27	3042.58	2456.8	1811.14	1025.66	1018.67	648.558
M186T65			3.35355	1.4912	0.0374497	186.103	65.124	66240	102630	148599	114298	145390	179309	282505	144516	174754	189224	156921	180118	202401	209181	209214
M324T58			0.21495	1.49109	0.111649	324.29	57.9085	621.769	296.204	496.634	436.295	453.505	616.621	445.319	462.369	467.894	1093.81	795.031	1091.1	586.33	585.91	612.421
M240T750			0.418278	1.49045	0.146631	240.064	750.377	1408.33	2004.61	4550.96	848.002	4753.79	4180.48	5969.56	5068.67	4870	4362.77	4486.14	1692.56	4423.7	4493.65	4752.8
M721T314			0.79543	1.49031	0.182376	720.55	313.778	10181	14141.3	8639.25	4437.69	5803.09	11823.6	6429.3	10910.4	16559.5	13748.2	8945.53	25412.8	10369.1	11119.9	10372.8
M425T642			0.309629	1.4902	0.133973	425.203	641.971	492.29	553.171	983.031	1478.97	1119.22	1714.26	1439.01	1813.2	979.849	1797.62	897.473	2522.14	1843.94	1702.43	1832.7
M782T80_1			2.4409	1.48996	0.0367824	781.556	79.779	84327.3	87028.4	88141.2	56976	89600.8	84536.8	77569.4	119669	145942	110472	92291.7	185046	62332.9	62397.8	62053.5
M300T88			0.921341	1.48992	0.197971	300.289	88.376	16339	15145.2	20075.7	30981	29609.1	23727	27236.9	48282.3	13260	12204.9	49004.5	52456.8	16628.6	20105.8	20329
M515T514			0.388286	1.48958	0.268973	515.325	514.04	4094.63	2796.85	1082.07	1640.94	2455.97	2804.67	3493.05	1619	2316.91	3705.73	8151.9	2871.17	3843.6	3844.3	4001.48
M876T646			1.08325	1.48949	0.205891	876.218	645.818	3195.3	6854.98	27188.9	29730.7	7618.74	9792.56	16722	28885.8	18357.7	23112.9	15336.1	23270.2	17446.2	17198.2	17102.3
M1176T722			0.236573	1.48923	0.0887651	1175.92	721.789	1429.88	1199.38	896.764	468.469	1464.28	1127.88	1212.02	1497.48	2307.7	2294.77	1671.74	825.33	621.926	756.565	593.893
M186T585			0.203129	1.48902	0.0645434	185.959	585.063	142.14	908.389	1175.91	839.035	1150.2	1000.75	1866.9	1150.22	1033.82	1193.88	1492.74	1029.83	1752	2133.62	1982.85
M394T421			0.217723	1.48877	0.105449	393.946	420.607	476.021	33.4751	648.92	814.765	1062.22	1114.72	1349.76	1161.05	1040.75	925.944	1043.64	657.415	1019.51	977.847	976.38
M803T530			0.793628	1.48862	0.168252	802.511	530.391	4573.82	9516.04	13251.7	9346.33	13752.1	10695	19583.4	9522.6	10124.9	12523.1	28526.6	10726.4	18810	18805.7	20141.9
M296T78_1			0.487298	1.48854	0.0912509	296.131	78.473	2005.88	2636.95	2249.48	2428.02	1541.37	5246.08	4233.91	3162.05	4436.94	4936.69	2179.41	5028.01	3684.71	3682.15	3844.4
M387T599			0.289076	1.48849	0.0464032	387.247	599.078	1269.77	1142.28	525.796	2127.91	1225.1	2027.23	1926.63	2887.92	2033.99	1963.65	1782.45	1786.78	2001.19	1921.12	1955.19
M688T264			0.311515	1.48796	0.0746805	688.49	263.538	1276.43	867.1	601.826	1438.01	946.931	864.49	1123.27	932.982	2001.29	1444.03	1193.68	2224.72	1045.33	1044.67	943.368
M457T681			3.48766	1.48767	0.128909	456.965	681.023	23453.9	175943	150558	201292	92300.7	266199	260464	286138	134739	245585	142866	283614	262147	179788	259885
M260T636			0.295852	1.4876	0.0288162	260.067	635.634	1374.07	487.876	1078.01	1332.91	1155.26	1962.92	1748.84	1943.29	1894.08	1565.31	1471.75	2371.67	1785.39	1689.14	1697.26
M244T507			0.401343	1.48751	0.0184674	244.042	506.868	2028.1	1271.62	1758.88	984.662	1678.37	1817.94	2785.71	1566.77	2079.94	3130.49	2159.49	2467.82	1365.99	1579.19	1572.18
M843T691			8.53018	1.48735	0.308199	843.02	690.581	199311	2.95821e+06	2.47001e+06	547640	1.01464e+06	1.17484e+06	2.02418e+06	3.10343e+06	2.88706e+06	2.93216e+06	962376	531961	1.71427e+06	1.63035e+06	1.71477e+06
M899T76_2			0.557044	1.48689	0.675913	898.608	75.769	7333.67	12033.3	1556.92	2749.13	3329.97	2125.06	1800.42	1734.37	1721.62	2976.03	1717.03	33360.6	2026.04	1934.88	1932.49
M552T910			0.301754	1.48685	0.279284	552.143	909.786	2220.82	5432.27	3389.06	623.162	2217.57	4276.53	2768.93	6926.32	8754.69	2701.1	3039.96	2809.4	1369.28	1366.44	1270.62
M272T57			0.946989	1.48677	0.0421775	272.258	56.571	19079.1	17653	19291.1	15655	12158.9	20691.1	25997.2	14832.3	40413.4	24018.4	22608.6	27540	10044.9	8557.74	8564.79
M556T328			0.197181	1.48615	0.347062	555.531	328.441	72.7967	96.5201	2706.51	1093.92	1281.21	565.272	2360.72	1597.5	1878.3	1030.12	1156.14	620.999	777.301	843.271	843.163
M747T77			0.565668	1.48608	0.0485702	746.51	76.5385	3430.45	6008.65	4332.09	2529.54	4298.13	3797.18	4899.09	3864.27	5657.68	7424.46	5516.27	8892.63	4816.33	4627.21	4877
M263T733			1.58198	1.48546	0.0744769	263.076	733.028	31249.9	20900.5	56191.9	39523.2	63768.5	71919.4	94097.7	69626.8	54627.7	88605	73200.5	41050.2	103476	103488	106516
M1179T641			1.01926	1.48527	0.293339	1178.54	640.69	9086.8	6396.86	17335.7	8155.82	5417.09	20015.5	16350.7	10458.1	10795.2	17484.3	7765.7	35779.6	9445.91	10711	10718.8
M123T367			0.342183	1.48448	0.316973	123.056	367.307	1660.43	2679.74	1813.15	260.36	1423.16	930.601	2258.09	4571.14	1133.26	2965.27	760.786	1326.53	1118.09	1156.56	1154.71
M685T732			0.739309	1.48401	0.0454206	684.924	731.822	5713.03	6357.16	4999.82	12536.5	7065.64	7475.59	11511.7	12479.1	11152.7	12920.3	5544.46	11907.2	12369.8	12367.3	12522.1
M416T76			0.910579	1.48399	0.0474639	416.227	75.637	12617.1	11036.6	24665.1	11344.9	15403.1	17508.3	26860.5	30191.1	18030.6	13414.1	22560.9	26323.2	16990.8	16747.1	17065.8
M811T49			0.425079	1.4839	0.329276	810.624	48.7655	2814.57	4068.88	2040.81	2398.88	2207.19	2302.1	2871.11	2584.77	2382.87	3201.02	2531.77	9922.28	2573.34	2478.37	1957.04
M573T48			1.31513	1.48338	0.0835143	573.486	48.124	29046.5	35751.5	16430.5	17159	21703.9	23233.4	19527	33765.9	35877	58556	31889.1	32990.4	34797.5	36516.2	34796.8
M856T347			0.461944	1.48312	0.0658038	855.501	346.816	1897.98	1054.62	2741.26	1947.68	2195.63	2466.23	1827.75	3113.34	1937.86	3736.78	3172.77	4458.98	3109.61	3003.13	3001.32
M356T777			0.447694	1.48288	0.231121	356.076	776.527	5310.99	1855.54	1780.78	1438.06	1627.48	3887.66	5993.87	5147.8	2464.73	5733.96	2146.08	2092.06	2484.14	2976	3035.69
M737T302			0.568697	1.48279	0.0240952	736.524	302.419	5232.9	6581.42	5411.03	3576.82	6422.7	6341.63	8203.26	9383.6	9882.72	4408.32	7379.19	10515.1	4299.5	4747.61	4747.28
M275T879			0.300953	1.48264	0.279354	274.989	878.701	871.277	2839.07	1256.45	695.971	1715.4	1101.42	837.136	3456.73	1906.89	1626.58	999.555	3745.31	1271.82	1337.91	1372.2
M668T75			0.546273	1.48228	0.0766342	668.395	74.584	4065.44	2797.88	3538.48	2230.04	2453.58	3126.24	2781	3759.88	2528.72	6326.84	5676.31	5922.07	3550.43	4029.98	4048.21
M360T75_2			1.0497	1.48209	0.0352549	360.255	74.618	19168.3	23869.4	18424.4	6831.74	20677.4	22000.5	25179.9	29002	39798.3	20795.5	23717	25977.7	17169.5	15414.4	17160
M425T338			0.522846	1.48207	0.253684	425.344	337.567	7474.74	2316.46	5377.05	1446.57	7203.43	8389.31	1346.97	9686.11	8634.92	5980.18	7491.02	14594.6	5079.55	4960.93	5083.19
M534T392			0.339905	1.48203	0.269586	534.293	391.623	4467.09	3214.07	2999.2	874.325	1453.42	1057.43	5377.75	1530.77	1321.11	3075.7	5815.19	3724.99	5421.27	5681.65	5846.59
M702T351			6.45246	1.48193	0.296664	701.558	350.562	418990	1.12733e+06	671590	487428	544792	453441	1.09747e+06	1.90017e+06	597898	1.19995e+06	402913	290041	1.37477e+06	1.34711e+06	1.34705e+06
M1143T690			1.39487	1.48189	0.423638	1142.51	689.657	3922.16	10239.5	7583.14	53925.5	44033.2	17296.4	22261.1	54943.1	6425.46	49701.1	8021.2	61666.8	34441.2	23618	34378.3
M691T334			1.02844	1.48173	0.152077	691.463	334.456	8695.57	5030.28	28573	18229.4	17413.7	27094.8	26934.6	27330.1	34046.1	20237.9	10763.1	36324.1	10003.7	10012.4	10471.7
M947T621			0.435332	1.48158	0.0514759	946.682	620.631	3363.94	1398.88	1285.29	2467.41	2848.53	4699.65	3965.16	4958.57	3159.13	4347.52	3518.83	3850.45	2866.09	3347.14	3337.98
M744T543			0.484789	1.48155	0.0286936	743.941	542.718	1129.35	2090.12	3008.97	2104.69	2686.75	1887.75	3885.01	3269.19	2249.42	3328.46	2358.17	4033.07	2123.11	2118.61	2056.71
M562T75_1			0.363332	1.48104	0.0462105	562.344	75.059	2332.16	2205.05	2970.01	2837.31	2029.41	1994.21	3462.96	2188.17	3619.98	2700.81	3703.03	5604.87	2275.7	2634.15	2638.02
M587T673			0.367461	1.48075	0.0743143	586.89	673.197	1242.6	721.658	2262.89	1779.95	3244.85	2147.97	2951.1	1936.11	2457.09	3805.08	2334.64	3396.42	3274.56	3294.13	3387.54
M165T79			0.442166	1.48073	0.110794	165.092	79.212	358.3	3335.2	2981.19	1585.04	4301.71	3054.4	3959.24	3042.99	5446.5	4662.72	3324.92	2686.43	3318.8	3343.12	3318.78
M727T638			0.848598	1.48061	0.155657	727.017	638.448	4945.01	4221.88	13257.5	8705.75	9548.75	8810.32	6960.76	20215.5	9692.8	16883.5	7145.13	12376.4	11548.8	10234.8	10671.9
M184T362			1.1765	1.48043	0.147103	184.073	361.538	21420.2	28871.9	34301.2	43385.2	32640.7	65333.2	64687.5	86845.9	76910.2	40394.8	35909.5	29759.4	38948.2	38991.2	41212.9
M691T313			0.512533	1.47999	0.12859	690.54	312.522	4049.14	6759.67	4098.89	3725.09	4644	4187.69	4849.2	5842.35	7750.78	4232.7	5461.61	12510.5	3526.66	3526.93	3639.43
M295T701			0.320667	1.47979	0.0557162	294.903	701.343	803.993	499.001	1472.86	1128.97	1852.35	1280.51	1636.86	1006.69	1742.88	2196.82	2080.87	1750.21	3580.58	3847.07	3577.87
M738T304			1.90059	1.47974	0.156393	737.531	304.158	12470	7746.54	67633.5	65558.9	41089	61167.1	30421.3	80865.5	52808	69817.8	74842.1	69562.1	68070.2	78175.7	68053.9
M627T49_2			0.878537	1.47921	0.2202	627.461	48.734	12769.8	18483.8	4423.66	3724.63	6970.37	7524.29	11068.3	10585.4	5438.4	20373.1	12552.3	19706.8	10211.5	10334.9	10212.2
M453T813			0.332391	1.4792	0.19477	453.007	812.841	1287.93	2166.57	834.723	2871.41	804.652	1310.27	3099.31	2146.59	3920.35	1621.05	1650.66	1282.44	1953.73	1742.09	1768.67
M724T299			0.659235	1.47889	0.22038	723.512	299.18	13356.1	6288.62	5531.32	3294.92	5496.49	8911.07	9932.13	12997.4	8725.66	5976.9	5767.47	20013.1	10763.9	8600.76	10732.8
M787T284			8.28987	1.47812	0.0697768	786.598	283.938	372847	394617	1.05886e+06	1.249e+06	1.05731e+06	1.17868e+06	921546	1.4654e+06	1.38112e+06	1.49867e+06	900857	1.68318e+06	1.25179e+06	1.29858e+06	1.25224e+06
M295T324			0.791532	1.47761	0.332183	295.226	324.203	7331.79	8792.97	7703.75	3509.87	7584.27	23820.6	11308.9	10886.1	7477.72	10514.1	15074.4	31538.5	13477.8	15597	13488.9
M534T50_2			0.151066	1.47752	0.266749	534.385	50.055	546.967	607.839	1498.74	957.341	465.664	913.756	527.053	1640.64	611.473	598.284	2176.81	1819	393.711	605.966	361.835
M728T347			0.616522	1.47694	0.299317	727.572	346.66	12783.3	10699.9	12071.5	28842.1	24186.9	9950.06	24785	46862.4	35263	6378.39	8058.4	24181.4	17140.5	14745.4	14727.5
M755T311			1.02294	1.47693	0.248485	755.494	311.173	20205.4	23085.1	14434.9	11937.3	1796.96	23791.1	30716.6	31065.3	17382	13184.5	7703.22	40626.6	7297.16	9856.27	9849.19
M582T796			0.265488	1.47686	0.406972	582.113	795.854	1729.84	2014.02	1467.91	939.103	1452.61	1115.33	963.061	894.819	4274.57	997.155	4944.72	802.18	853.284	853.5	901.297
M477T895			0.326503	1.47652	0.0127404	476.825	894.686	1082.62	1475.92	1480.75	589.534	1255.06	1240.15	1761.01	2028.41	1351.2	1864.29	1401.13	2112.73	1721.77	1721.39	1689.93
M805T84			0.221851	1.47631	0.1044	804.555	84.381	492.166	351.028	662.887	1098.41	362.395	770.424	598.151	1371.04	816.048	760.44	1169.59	802.151	984.963	892.249	919.348
M669T673			0.478961	1.47565	0.0315874	668.893	673.41	1489.85	2090	2836.37	2573.42	4287.9	4137.42	4686.57	3935.29	3604.66	4614.9	3413.94	5443.12	4983.9	4989.21	5134.59
M230T737			0.207221	1.47522	0.247727	230.157	736.854	1195.7	789.671	923.047	1308.76	1181.26	1972.73	1088.09	786.506	985.225	1994.25	3631.88	2388.17	1668.87	1682.11	1686.77
M859T786			0.324683	1.47495	0.0968394	859.207	785.868	690.501	1928.5	2099.09	4172.28	2176.95	3243.08	3732.45	5056.35	3044.19	3474.78	3581.38	2217.93	3923.17	3994.31	3924.89
M774T74			0.146905	1.47453	0.261637	774.474	73.533	836.49	1836.73	5634.7	3826.86	2118.22	1419.69	4383.65	2159.42	6281.59	2454.75	5576.83	2253.57	2289.06	2244.89	2768.39
M230T297			1.17452	1.47446	0.253238	230.247	297.402	50550.7	12092.4	22861.7	14990.6	16960	23535.6	39138.3	21336.1	37915.6	66307.4	23659.5	19529.6	17279.4	20477.8	20496
M265T75			0.624526	1.47444	0.149295	265.216	74.652	4617.97	3999.62	4007.67	3071.33	5529.53	5211.58	5567.64	11738.3	4105.36	7547.96	2765.7	7255.78	5524.03	5519.28	5378.61
M605T49			1.08255	1.47429	0.253078	605.476	48.6115	20994.3	27917	7045.84	6785.39	10031.5	11105.5	14353.4	17827	8999.88	28870.3	16735.3	36876.9	16396.2	16395.1	16118.6
M604T308			0.777423	1.47397	0.0171117	603.533	308.095	9140.97	8924.97	7589.35	9679.53	9710.93	7797.39	10599.2	14278.1	14516.9	9742.35	10143	18609.9	12165.9	12541.1	12163.4
M812T74_1			0.688023	1.47364	0.680379	811.561	74.113	6504.72	20694.9	4240.95	4518.88	8106.7	2017.39	2081.17	2631.65	4693.16	3838.1	2761.29	51905.1	2520.68	2614.4	2610.72
M411T794			0.235305	1.47361	0.0298242	410.902	794.401	376.62	691.048	689.043	348.691	628.888	891.897	818.756	614.016	1138.99	805.615	962.819	1003.4	705.586	706.259	748.933
M431T61			0.680053	1.4734	0.465413	431.173	61.001	3127.18	3712	24871	5572.55	3090.58	6840.83	3168.17	25675.5	4977.42	6116.98	15527.6	14099.6	7154.25	6884.46	6886.89
M388T79			0.280363	1.47332	0.241127	388.27	79.289	362.256	610.81	2509.54	813.207	1922.29	3499.62	3332.52	1759.46	2118.4	1611.04	3603.58	1892.29	2227.96	2226.11	2269.49
M229T511			0.171017	1.4729	0.173172	229.007	510.677	810.725	257.603	444.753	292.993	299.482	460.22	1163.79	435.409	599.396	554.302	543.92	482.309	427.146	429.437	498.706
M248T780			1.14097	1.47283	0.473711	248.065	779.954	6265.36	3011.21	21216.1	37911.6	43510.9	18192.2	15096.1	19683.1	29075.2	91065.3	13654.7	23051	76674.3	104055	103847
M252T55			0.239057	1.47252	0.334881	251.948	54.918	1681.62	588.641	497.378	512.454	613.82	439.146	1225.61	422.776	714.072	1373.54	459.212	2185.29	1042.86	1052.2	1056.09
M152T842			0.272347	1.47202	0.0549803	152.001	842.121	1121.53	643.594	939.615	982.026	482.266	521.924	1589.26	664.384	1407.4	1076.91	1090.1	1077.14	1054.07	1105.54	1032.52
M565T544			0.23741	1.47179	0.139372	564.992	544.362	247.022	45.231	607.567	1138.72	1018.07	1031.19	1269.75	995.182	1097.63	960.588	729.875	963.347	928.063	846.554	855.949
M783T80_1			7.40913	1.47166	0.254477	782.567	79.711	764813	631494	604253	437895	794202	1.73121e+06	647281	795734	1.5054e+06	1.13768e+06	846715	2.37232e+06	599090	589320	589320
M553T866			0.370016	1.47145	0.248439	553.233	866.313	2306.44	2669.43	1680.67	2778.24	1416.5	1036.65	1911.38	1209.5	2655.5	5874.52	1879.51	3962.04	2366.89	2107.74	2100.47
M580T375			0.566097	1.47136	0.238277	580.431	374.735	8280.1	2970.32	9906.47	9054.24	11630.1	8038.65	5848.22	6874.64	16574.1	6325.19	14502.7	23266.2	4852.65	5246.89	5240
M235T303			0.419086	1.4713	0.0398006	235.046	303.482	1842.95	2128	2182.23	1518.82	2840.09	1719.18	3098.53	3843.67	2632.42	4028.99	2776.26	1615.96	2189.23	2196.47	2401.09
M466T361			2.08041	1.47097	0.324115	466.329	360.593	115304	70767.8	57551.4	63831.8	62160.8	35313	179191	184958	40546.4	104574	67771	18599.8	136807	136807	135368
M869T48			0.410134	1.47064	0.144917	868.708	48.005	2673.47	3654.58	588.685	1345.15	1397.68	2309.34	2975.5	2300.6	2035.88	3541.53	2247.26	4501.13	3010.12	3009.59	2961.51
M445T61_2			1.8779	1.47027	0.504305	445.186	61.16	25997.4	26878	216542	31765.2	22324.1	46287.1	22903.7	205726	41266.6	46844.3	122235	104722	38817.9	39902	39865
M867T711_2			0.954682	1.47002	0.0981383	867.482	711.414	8341.13	15009.6	8508.69	11780.6	21287.5	8047.5	17652.7	19924.2	17958.9	18348.2	8005.66	25385.2	25769	26167.5	25773.9
M271T66_1			0.726301	1.46968	0.569843	271.06	65.997	13212.9	28613.1	4338.36	4268.05	9565.33	1115.68	6100.34	21865.8	47282	4769.54	2566.77	7232.58	1575.34	1150.59	1570.92
M161T640			0.501203	1.46966	0.043969	160.9	640.029	2966.37	6154.83	7440.04	3936.71	6778.21	6761.73	9627.13	11006.4	7580.26	5194.95	9854.95	6760.61	7440.23	7810.37	7438.43
M562T64			0.27941	1.46931	0.172966	562.29	64.0565	1759.6	1931.71	578.2	696.19	1033.87	642.808	1152.47	2518.8	2102.49	1854.61	897.832	1233.49	876.46	915.941	876.837
M438T370			3.03825	1.46924	0.449392	438.297	370.099	219995	193384	71395.8	92293.7	90698.5	54443.5	439190	290089	55906.8	183272	59896.1	32750.7	273651	274255	274593
M498T341			0.61363	1.46888	0.200137	498.261	340.812	2034.57	10163.9	3419.17	984.011	5073.84	3595.77	7648	5616.71	7822.93	6593.87	4377.81	5060.99	2494.81	2518.28	2594.55
M587T752			0.237983	1.46861	0.372905	587.123	752.115	740.138	1369.03	514.21	595.479	837.552	486.888	296.702	733.462	1099.71	501.312	1324.2	2716.97	647.537	626.002	626.644
M327T61			0.44528	1.46842	0.235898	327.065	61.2545	1986.14	2426.61	7825.17	1529.99	2014.09	2820.66	6190.61	6470.13	5033.42	3328.77	3181.09	3112.54	2145.37	2030.24	2033.08
M237T78			0.437024	1.46836	0.182449	237.147	78.4935	1613.73	3005.92	2924.25	2055.46	2090.7	3167.85	2967.62	7278.32	2066.21	2704.52	2913.54	3886.46	3153.73	1913.63	3051.91
M498T42			0.505001	1.46833	0.133348	498.294	42.035	5807.88	2460.35	2734.42	1342.22	2878.4	2630.97	2858.32	6713.13	4059.43	4795.83	4938.87	2850.37	3899.39	3912.65	4148.6
M399T77			0.479742	1.46832	0.0853189	399.148	76.5115	1962.6	2837.56	1399.62	2403.82	3712.95	1868.34	1838.84	4225.03	2320.72	4840.58	3632.23	3970.56	3934.08	3720.56	3721.26
M324T899			0.269035	1.46803	0.24714	324.093	899.26	2048.17	1988.73	3618.51	1350.52	838.998	794.315	3184.18	3090.54	1493.61	3176.86	4048.8	624.789	2341.35	2363.69	2363.46
M630T73			0.298175	1.46802	0.123915	630.452	72.634	1726.56	1115.81	1292	177.095	700.08	1590.06	1210.24	2033.1	2369.45	1251.99	1504.22	1322.27	1511.74	1159.44	1534.11
M286T419			0.877871	1.46754	0.0248735	286.201	419.245	8874.07	9343.57	12039.7	6081.35	10138.2	12861.8	15111.9	14045.5	16014.5	13356.8	8862.39	19691	7720.8	7831.3	7856.75
M513T1005			0.344535	1.46754	0.257463	513.033	1005.11	625.849	2511.77	1790.56	93.8932	1460.28	3004.4	1705.62	3908.48	1759.57	2732.74	1022.35	2793.43	1295.72	1295.6	1350.52
M81T89			0.358391	1.46737	0.188522	80.6646	88.994	978.653	3141.63	1284.65	520.695	1487.01	1536.91	2263.1	3488.38	1829.82	2728.19	1301.12	1521.68	976.716	887.53	871.463
M1190T677			0.289602	1.46731	0.0836166	1189.93	676.674	427.675	1010.72	1211.5	1056.78	1311.01	1595.32	1804.85	1114.06	1786.77	1757.58	893.82	2346.26	1758.4	1768.91	1857.49
M949T684			1.00253	1.46697	0.215842	949.485	683.871	14515.5	9816.47	5479.42	32491.7	40590	26327.7	40126.4	11170.7	43299.2	39882.8	22103.3	32981	36481.9	36809.8	30532.2
M822T74			0.439732	1.46631	0.160922	822.461	73.5655	3449.72	1217.03	4552.45	5095.4	2323.99	2099.23	3778.87	2392.87	4762.09	5872.6	3319.45	7349.65	1484.14	1892.25	1900.77
M623T595			0.188825	1.4663	0.161886	622.924	595.013	239.239	1224.53	1359.17	1078.31	1593.8	1271.56	1914.72	993.459	2890.29	1061.37	1276.01	1786.02	1550.8	1485.39	1549.53
M710T74			0.374944	1.46596	0.159987	710.4	74.3215	2878.73	2479.04	2968.28	353.916	820.644	2314.26	2701.89	2920.75	1540.24	2803.84	2747.93	4605.52	2006.73	1912.87	2003.99
M163T615			0.32707	1.46501	0.484515	163.025	614.983	1006.49	4818.8	786.584	1138.77	1977.26	348.821	601.127	914.417	1736.56	1358.3	5387.34	4764.79	5444.56	5571.54	5567.26
M548T379			0.740068	1.4645	0.134598	548.272	379.336	8652.06	12301.4	7625.06	5247.88	8016.74	6005.05	21180.1	13043.1	9416.87	9343.7	7458.25	9631.62	7940.52	8017.05	9001.18
M695T50			0.992687	1.46448	0.118201	695.311	50.12	8108.13	11159.6	20073.9	15383.9	7069.61	12721	6577.44	27407.5	19794	17287.6	19673.4	18387.7	7543.23	7615.1	7764.2
M1079T676_1			0.401238	1.46406	0.064612	1078.91	676.111	688.075	1929.71	3030.37	1905.72	3518.86	3327.18	3816.2	4749.3	2934.45	3598.42	2658.3	3325.66	3366.02	3368.07	3673.45
M345T732			0.991507	1.46386	0.0747929	345.079	732.497	7793.7	8807.95	17312.5	13607.3	19803.4	24003.3	24019.6	25239.6	18060.8	31916.3	18507.5	15947.5	27971.6	27970.3	28282.3
M783T58			0.525581	1.46378	0.297097	783.491	58.3125	1731.83	7759.83	3250.1	2362.04	3576.2	3785.59	4934.52	2223.64	3911.63	11509.2	4040.34	6265.38	2973.32	2979.16	2385.56
M515T319			0.310464	1.46345	0.313607	515.131	318.608	503.424	691.264	540.58	1828.5	1410.84	1706.98	1046.21	1520.16	1082.88	864.101	1627.89	3636.92	542.171	622.27	624.976
M446T667			0.463735	1.46337	0.0629593	446.134	666.752	4225.03	2262.92	4072.44	4502.17	5058.98	4389.18	7944.38	3158.07	3802.25	6739.31	7506.82	6717.36	10884.7	10188.8	10888.6
M233T852			0.32318	1.46312	0.0390581	232.951	851.838	1665.65	908.809	1504.57	796.999	1038.88	894.923	2132.8	1273.38	1497.5	1912.2	1988.14	1159.59	1970.86	2034.35	2174.35
M900T350			0.364406	1.46302	0.193818	899.527	349.659	1639.11	407.396	774.324	1617.77	1966.22	2386.53	1404.85	1813.8	1167.12	3215.41	1876.77	3383.97	1853.88	1865.76	1652.25
M279T734_1			0.423038	1.46299	0.163478	279.05	733.646	3215.47	863.382	5494.94	4105.95	6546.96	8432.53	9479.99	6539.41	5142.67	8673.33	8804.42	3288.42	8650.05	8580.78	8580.96
M159T364			0.251935	1.46279	0.256843	158.938	363.88	692.901	568.654	1149.15	1578.46	1244.54	1429.26	3545.7	1124.44	1065.07	1573.64	1012.63	1424.99	1948.8	1821.55	1824.58
M641T794			0.305415	1.46259	0.0497417	641.165	793.811	1183.08	1296.69	2133.28	1803.94	2077.04	1755.62	3492.79	2925.11	2632.4	2771.7	1751.74	1417.28	2825.17	2620.4	2608.91
M793T175			2.32065	1.46258	0.443408	792.587	175.002	63120.9	95978.2	720169	362874	467010	283781	1.23815e+06	482792	288345	232563	558124	114850	692444	689399	869386
M496T1223			0.243843	1.46249	0.332331	496.338	1222.97	1136.88	1446.89	348.327	705.331	95.0227	688.424	718.45	995.384	663.272	2308.9	549.093	1230.39	1054.54	722.409	1064.1
M664T335			0.57182	1.46227	0.078914	664.432	335.471	3898.24	3854.89	7731.47	6287.04	7879.32	10456.5	14655.2	12009.1	8654.67	7497.05	7907.44	7924.16	6720.29	7306.88	7339.66
M616T673			0.21754	1.46204	0.0791144	615.913	673.163	325.237	470.521	1508.96	896.519	1756.38	1168.96	1550.32	1348.34	1652.83	1640.16	1538.33	1227.31	1660.46	1594.2	1660.5
M725T78			1.79948	1.46201	0.182838	724.525	77.598	37510.2	47062.6	39079.8	36431.5	49090	56180.8	47939.5	54956.1	48758.1	55826	46682.7	133788	44100.2	44119.7	45204.2
M224T377			0.788695	1.4615	0.329804	224.066	376.995	17617.9	53651.5	15878	6667.33	13948.7	34027.6	12694.9	31769.4	24959.4	27574.8	69975.6	40254.1	8490.06	9214.21	9213.88
M314T510			0.267727	1.46135	0.411561	314.063	509.892	617.42	965.831	924.162	1124.22	719.58	1385.88	798.751	870.417	677.023	502.04	1805.31	3730.36	709.432	749.771	865.585
M129T71			0.772881	1.46118	0.202714	129.055	70.8135	4783.09	6956.55	5895.99	5535.91	6732.86	7298.51	9619.22	6591.83	4757.84	10213.4	4942.01	18235.9	5938.05	5958.55	6391.62
M432T381			0.438629	1.46096	0.284352	432.222	380.83	2487.57	1267.81	2390.41	592.605	2144.35	5063.64	3330.34	1519.98	1985.53	3920.68	3158.99	6459.54	1947.67	1822	1949.02
M318T746			0.203698	1.46092	0.10428	318.19	746.47	1336.74	579.537	541.538	889.716	463.888	1013.87	1646.13	1149.64	1468.86	803.119	669.919	1311.7	932.25	978.253	943.646
M505T81			0.528076	1.46036	0.10294	505.133	80.952	1026.97	4184.75	3859.07	3319.22	4799.28	3501.49	7380.28	2864.33	3285.16	6157.97	5719.78	4808.41	3212.07	3225.96	1929.66
M358T870_2			0.235027	1.45965	0.58174	358.112	870.268	583.962	1879.42	1366.07	526.861	145.739	831.079	504.476	777.292	487.636	759.014	618.244	4637.84	3203.23	1626.72	1912.49
M784T354			0.491794	1.45954	0.178201	783.635	354.009	5759.08	6120.43	3718.77	4221.03	7824.25	2834.57	2965.6	13649.7	5913.86	6874.63	7555.67	7524.57	4873.32	4832.52	4295.67
M385T374			0.608036	1.45928	0.0402698	385.272	374.125	5480.06	4912.34	9092.35	3222.71	8035.59	7799.05	8249.3	6887.87	10957.6	12644.1	9307.01	8197.79	3862.17	3943.74	3949
M691T637			0.690552	1.45912	0.244731	690.988	636.803	4977.4	6556.15	6683.5	13376	4391.57	6558.09	8853.19	21488.1	6965.85	8145.05	6696.32	9926.52	6092.67	5546	5594.43
M516T79			0.436979	1.45911	0.0434304	516.303	79.3415	2163.23	2816.58	1858.67	1240.16	2125.21	2920.68	3292.07	1809.19	3014.95	4484.44	3479.98	3069.57	2189.49	2192.05	2107.46
M1108T639			0.782863	1.45899	0.0658096	1108.01	638.76	3312.18	5611.71	8171.84	8809.75	6559.3	8124.81	7253.72	13976	11187.9	10713.7	5427.8	10660.7	13303.3	15987.3	13251.5
M786T305			0.468838	1.45886	0.172294	786.49	304.976	3368.53	1134.05	2408.57	1428.64	2388.81	6308.49	3895.15	4103.35	2139.8	4928.88	4624.82	5162.82	4134.71	4179.34	4134.3
M619T285			0.353896	1.45865	0.230768	619.096	284.695	351.752	1255.86	5529.24	2235.26	3399.82	3601.43	3918.08	4976.76	5405.9	1875.79	5311.39	2395.09	1991.66	2466.07	2453.52
M740T306			0.578502	1.45832	0.155412	739.505	305.946	1720.61	8393.39	5238.87	4681.88	5482.8	8765.28	7823.96	7150.34	9137.63	5032.67	6462.87	14387.8	5366.88	5369.06	5204.61
M333T300			0.35344	1.4577	0.0721294	332.913	299.634	800.289	621.176	736.9	2015.41	2185.31	2168.4	2120.01	2117.42	2233.81	2127.28	1729.5	2102.45	3600.65	3606.24	1019.69
M453T345			1.53886	1.45747	0.193974	453.342	345.005	49384.2	81165.4	85277.5	83205.1	42040.4	88168	154780	87272.4	35520.9	51433.6	160179	136420	73594	73353	67784.8
M347T551			0.145379	1.45684	0.145394	347.325	551.094	237.773	489.622	811.382	815.558	517.99	1073.52	610.85	1525.24	951.072	651.511	1228.23	781.573	1111.49	1037.05	1037.83
M810T48			0.394203	1.45656	0.0876798	809.625	47.997	764.968	3579.9	1817.27	2253.45	2939.39	1478.64	2990.39	3051.48	2034.99	3369.73	2894.44	4351.95	2991.32	2451.19	3054.25
M684T730			0.371949	1.45647	0.0114676	683.903	729.548	3816.77	1935.94	2927.26	1977.97	2998.24	1644.07	3796.23	3403.31	4109.95	3416.83	4243.08	3314.94	2234.01	2243.31	2439.15
M924T395			0.233106	1.45636	0.14571	923.501	395.298	2098.98	516.158	701.546	1581.39	1672.75	902.752	2211.64	1795.88	994.345	1186.13	2093	2603.21	828.281	1104.9	904.652
M1142T689			1.0307	1.45613	0.221137	1142.01	688.564	36876.5	37336.9	27452.4	72167.5	56445.8	20144.4	69351.9	31144.6	87801.2	92365.5	65907	18078.6	43986.8	51520	51601.5
M280T95			0.394319	1.4557	0.427072	280.263	95.117	12260.5	8980.4	76990.2	43005.3	144812	33338.6	100438	35757.5	154071	24625.9	104432	45607.4	52308.2	52232.2	44285.1
M271T54			0.404451	1.45549	0.128269	271.152	53.827	3593.18	2191.07	713.207	4786.19	1442.56	3910.95	3589.21	3397.03	4404.77	3906.23	3060.09	5857.84	1416.74	1353.9	1452.26
M907T542			0.413647	1.45485	0.0350216	906.912	542.139	814.127	1299.68	2010.29	1227.43	2537.03	2119.58	2133.16	2259.08	2253.66	2628.45	2146.11	3139.87	2134.84	1560.08	2107.49
M390T331			0.273148	1.4547	0.23547	390.27	330.603	1213.87	867.023	1382.08	1319.24	3715.75	4656.79	3983.07	2695.17	5029.25	2250.61	2187.69	2990.49	1179.48	1161.06	1202.93
M455T637			2.73802	1.45452	0.230452	455.012	637.39	9808.49	69039.4	36537.2	140389	112292	179075	112100	164265	138801	179697	49633	151333	117668	100376	99168.4
M595T440			0.222869	1.45451	0.222849	595.113	440.483	542.553	1087.27	1411.43	1126.61	717.687	1209.69	1419.35	983.258	1308.3	3008.52	1469.35	676.794	955.273	881.555	956.211
M283T74_2			1.29927	1.45445	0.721656	283.193	74.282	1471.59	4488.48	1766.64	122829	2735.8	5573.4	1462.61	123673	5173.86	3873.87	2768.6	65019.5	1544.76	1884.59	1588.38
M1096T716			0.649755	1.45417	0.0512518	1095.95	716.156	2621.75	5389.07	7994.62	6866.84	7960.83	7811.75	11093.8	6296.08	6741.45	12559.3	9508.62	9996.75	11052	10676.2	11052.7
M243T143			0.0743551	1.45408	0.342569	243.287	143.366	137.622	102.496	1545.39	633.998	1565.65	631.621	1097.96	1386.74	2000.62	485.448	1185.89	556.495	1171.3	1215	1171.07
M406T776			0.227113	1.45404	0.318172	406.107	775.735	854.477	794.466	979.021	1271.9	1142.83	544.13	1828.57	3076.69	698.338	695.313	720.388	1104.16	716.635	717.919	782.616
M266T70			0.563794	1.45353	0.0699969	266.175	69.95	6681.8	4882.65	1559.78	3226.29	4071.99	5417.12	5641.26	5148.48	4319.43	8516.17	6536.43	7396.83	4638.9	4614.12	4594.89
M222T77			0.41044	1.45342	0.137327	222.157	76.843	1145.12	1469.35	2345.89	1876.7	3429.12	3990.42	3059.53	1205.48	4245.05	4280.37	3987.45	3942.96	3816.07	4001.9	4005.18
M826T680			0.895889	1.45326	0.165902	826.481	679.875	4862.82	20937.3	12740.5	10105.9	13837.8	6784.78	23324	16616.6	8039.3	15294	12585.2	24806.7	15853.4	15166.6	15182.3
M528T275			1.86455	1.45318	0.235248	528.271	274.584	15853.8	12658.2	76187.6	15876.9	65218.7	105362	67698.9	83269.7	92363.2	63287.8	44102.7	72382.6	34785.7	30741.5	34701.1
M629T49_2			1.19336	1.45317	0.247166	629.476	48.847	23049.2	37244.2	9001.57	5454.79	11265.9	17247.8	21115.3	18710	12710	38431.1	22329.8	36763.3	21148.4	21249.9	21249.9
M850T639			1.37132	1.45262	0.369307	850.024	638.758	17237.5	11134.1	52807.3	22997.4	22773.4	16794	17975.1	9324.99	15880.4	56915.8	41092.8	67616.4	18266.2	19503.8	18301.4
M113T180			0.47959	1.45249	0.0771282	112.998	180.039	4084.56	1459.99	2938.17	2165.77	1857.71	4543.91	5068.36	4883.96	4181.53	3741.41	2337.66	4552.17	2789.36	2795.76	2662.34
M422T584			0.274032	1.45239	0.20346	422.133	584.235	1561.86	1373.22	1091.27	347.463	1910.56	3026.9	2494.9	1364.59	1158.65	3053.76	3378.64	2073.05	801.681	787.389	796.84
M744T82			0.29658	1.45235	0.239968	743.543	82.346	531.708	2513.61	419.588	1716.31	156.688	1091.4	1864.13	1483.04	1310.43	1137.15	1634.72	1908.13	1436.32	1265.17	1304.78
M641T472			0.193096	1.45231	0.216161	641.047	471.653	727.603	544.635	1648.51	484.418	840.754	646.542	1505.78	1924.3	552.001	1259.03	1281.19	583.056	1272.51	1373.69	1373.32
M383T793			0.430203	1.45213	0.125852	383.04	792.68	1268.95	2903.88	1813.6	2873.74	2408.53	3052.32	1721.79	3524.53	2719.05	3864.41	3039.44	5926.79	2499.79	2424.42	2463.15
M314T79_1			0.585736	1.45202	0.420045	314.187	78.8365	2395.58	12162.8	3015.58	3510.63	4017.77	2532.9	3169.98	8324.05	4024.46	15275.5	2491.89	6841.19	8818.11	4706.83	8861.32
M1190T638			0.861385	1.45201	0.085764	1190.02	637.733	4067.64	7789.43	9456.91	9711.67	5862.66	11869.7	9598.35	17981.1	8033.52	11361.2	9270.25	14552.8	7223.17	7857.17	7814.81
M789T704			0.313399	1.45198	0.0651422	788.966	703.786	1350.97	2210.95	1697.75	1736.07	665.646	1007.12	2056.08	2303.03	2192.36	1760.67	1340.66	2933.69	753.879	753.891	745.475
M531T732			0.369381	1.4514	0.10874	531.066	732.13	765.34	1682.33	2413.6	2780.03	2747.93	2973.34	2666.03	4811.85	3216.18	4307.63	2027.67	2365.05	2328.27	2063	2071.15
M815T352			0.694995	1.45122	0.289113	814.685	351.561	4378.68	3614.38	5326.87	6143.24	5460.35	15420.7	5326.77	13327.3	5753.58	8229.7	7736.21	18174.7	12485.7	11548.7	11561.1
M744T573			0.356081	1.45099	0.0522403	743.779	573.313	1443.91	2030.21	1550.86	1103.69	1482.92	1669.97	2433.41	2223.2	3366.06	1329.03	2475.63	1640.17	1343.37	1487.65	1485.06
M681T50			0.358798	1.45094	0.242662	681.295	49.909	324.756	1586.97	3306.61	3070.15	744.35	2175.76	862.021	4236.9	2586.07	2209.49	3261.65	3106.9	1450.47	1245.84	1245.2
M447T79_2			0.377503	1.45087	0.113071	447.31	79.014	1044.77	1831.74	3794.15	1828.76	1797.22	1249.79	3278.07	3424.92	3646.78	1929.67	2225.03	2247.89	2143.55	2140.76	2318.25
M420T713			0.307483	1.4506	0.174543	420.1	712.554	822.487	1036.25	1558.9	1743.88	287.29	824.301	1200.96	1312.93	823.415	2194.34	1300.49	2267.62	853.172	838.836	970.831
M404T536			0.20016	1.45047	0.236246	404.101	535.936	828.142	464.671	776.808	721.656	548.183	1308.27	347.624	536.953	1418.42	1374.1	1997.41	1066.89	776.342	775.956	812.012
M586T275			0.538997	1.4496	0.259029	586.23	274.65	737.783	512.972	8546.28	1690.65	7034.75	9014.33	6610.83	8129.06	8278.68	5976.78	5463.27	5458.67	4389.43	4659.99	4392.76
M932T732			0.28912	1.44956	0.140536	932.094	732.484	797.287	1312.22	761.711	782.92	1039.32	857.106	597.933	991.003	1653.83	1328.03	1142.88	2332.23	651.428	687.812	651.214
M845T632			0.871763	1.44913	0.105668	844.962	632.226	10086	9439.55	13559	11799.9	12493	18758.8	15720.3	25170.6	21258.4	25992.5	14747.9	7441.49	13717.8	14929.7	13457
M375T667			0.553678	1.44908	0.0668189	375.098	666.511	6061.06	1711.99	6578.08	7939.18	7440.49	6728.56	11547.6	6705.27	5345.29	9815.86	10493.1	8925.4	13544	13459.1	13543.5
M427T429			0.332022	1.44886	0.0472174	427.107	429.206	1506.07	1153.78	2179.84	1209.95	1988.72	2011.26	2445.04	1964.29	1792.86	3716.07	2445.29	2196.93	1712.67	1534.66	1710.2
M875T322			1.67369	1.44862	0.462535	874.577	321.579	17929.1	23644.4	11440.7	9403.73	38867.8	131349	30005.2	85597.9	21246.4	90150.4	35238.8	74759.9	21690.7	23376.9	23345.5
M780T303			0.659993	1.44827	0.309041	780.065	303.432	10043.5	2791.48	6270.96	4467.96	7588.72	15197.7	7016.68	10465	10751.1	6649.34	8145.49	24114.9	7022.42	7753.16	7759.77
M304T608			0.20632	1.44811	0.0437052	303.937	608.044	886.623	686.029	1091.46	856.531	591.415	961.556	1099.2	1351.76	1775.05	841.84	868.086	1411.2	761.669	733.828	762.711
M622T689			1.52837	1.44808	0.130858	621.974	689.159	24241.7	69723.9	76944.2	76280.6	36131.6	73355	78996.6	60573.4	50656.3	90169.7	142251	93848.6	111616	122961	122717
M607T672			0.319555	1.44708	0.133468	606.962	671.717	1788.04	1447.09	896.445	498.311	1974.33	660.008	2144.47	1519.5	1155.83	2528.7	1888.76	1274.69	1798.1	1967.57	1839.53
M536T48			1.30981	1.44696	0.0881184	536.165	47.937	30576.1	27318.3	20260.4	28775.3	28545	16203.5	34677.6	38317.2	37613.5	60443.6	20547.2	27874.4	77656.1	78292.8	85493.9
M364T66			1.52868	1.44693	0.216093	364.251	65.5005	47619.2	56525	17186	4507.52	28893.5	25135.8	39690.2	31156.2	25047.2	56875.9	40717.1	66768.3	27187.9	27523.6	27187.9
M481T893			0.214665	1.44684	0.240498	481.106	892.86	1606.17	951.791	886.835	576.518	692.101	895.735	643.251	408.493	1082.2	2027.17	1886.08	2068.34	806.876	732.272	744.504
M352T389			0.461128	1.44654	0.316616	352.091	388.658	2276.98	1805.2	3817.59	4183.84	995.92	7035	1264.25	5518.53	6542.26	8650.55	2338.28	4782.52	5980.59	2377.94	6163.54
M211T423			0.391574	1.44652	0.204228	210.945	422.914	436.677	732.852	3458.71	1935.19	4378.11	4025.37	4926.04	2865.14	3375.74	4919.63	3151.16	2412.25	4610.38	4225.72	4234.28
M513T630			0.429837	1.44646	0.0270399	512.738	630.363	2776.6	1383.61	3523.33	2557.22	4615.53	3101.16	4806.06	4483.52	3318.6	5202.69	4289.89	3873.9	3825.66	3818.93	4056.69
M520T830			0.524504	1.44638	0.0724023	519.947	829.722	3081.67	3941.37	2847.75	1042.87	2715.14	3276.05	2774.99	3756.13	5747.98	4191.34	2884.56	5095.79	2195.97	2378.07	2383.68
M952T52_1			0.3224	1.44625	0.180815	951.627	51.721	2641.4	2867.65	5406.64	1710.9	1896.97	2422.19	2067.4	6185.12	2658.1	3360.39	5782.69	4454.13	1934.34	2006.95	2007.54
M973T678			1.01239	1.44623	0.0145677	972.945	677.608	9717.56	19083.3	12184.8	15382.8	15143.5	15876.5	24430.8	19527.5	18409.6	28165.5	19056.3	16793.7	34040.5	34069.9	27679.7
M335T701			0.212843	1.44615	0.103048	334.895	700.672	432.047	80.5802	677.701	718.708	1023.26	831.823	1092.83	616.555	1105.87	794.797	995.644	837.795	2119.36	1912.88	1899.48
M322T499			0.290075	1.44571	0.0856974	322.076	498.613	1447.66	765.836	1008	968.044	493.938	549.374	1255.71	1128.48	1160.48	1611.35	718.297	1690.86	962.83	982.235	962.671
M928T658			0.817112	1.44562	0.213695	927.97	657.791	14398.9	6035.26	6739.41	3821.55	19919.4	5046.32	10964.5	15527	21290.8	11371.9	10564.1	11180	8441.49	8552.84	9455.51
M583T47			0.0657328	1.44559	0.373806	582.55	46.5505	627.362	469.703	132.772	601.641	667.814	587.698	152.342	308.635	1457.12	290.186	1320.44	933.812	518.547	534.611	710.374
M384T58_2			0.212279	1.44499	0.213952	384.311	58.303	1066.98	447.546	619.539	388.753	521.943	956.593	410.011	545.483	900.284	893.388	1570.59	1462.16	648.968	646.81	724.917
M820T297			1.38066	1.44493	0.0342457	819.605	297.334	30666.1	32965.2	35759.7	34037.5	67978.4	50397.9	55862.2	58789.6	64718.9	40849.6	72249.9	71369	56639.8	62167.5	61881.9
M216T752			0.291217	1.44485	0.0652909	216.023	751.56	1075.8	1055.75	1297.72	737.324	438.204	517.815	1232.86	911.184	1245.6	1584.56	900.865	1526.32	821.309	860.09	828.517
M800T587			0.289103	1.44473	0.0211332	799.872	586.716	581.15	1493.92	1144.15	1482.66	1622.7	1522.38	2534.62	1835.39	1509.2	1818.6	1729.19	1909.77	2363.67	2335.53	2481.59
M578T294			0.36347	1.44448	0.193195	578.363	294.247	2227.27	987.107	908.141	754.441	2005.51	2949.27	2459.43	1609.53	1130.06	3209.71	2242.83	3550.25	675.761	631.697	619.151
M431T79			0.48346	1.44446	0.04155	431.312	78.955	1790.78	3000.81	3890.86	1537.32	2130.22	3374.42	4284.6	2969.23	4646.83	4426.23	2836.63	3549.8	2419.66	2507.69	1940.95
M387T79			0.429022	1.44446	0.119642	387.274	78.8	2647.02	3318.01	4369.18	2499.61	1155.11	2237.09	4088.35	2768.46	5251.33	5453.71	3873.04	2002.94	2406.6	2371.09	2561.75
M299T820			0.288023	1.44406	0.0548699	299.091	820.228	744.175	1290.38	703.37	557.893	876.468	778.455	914.109	958.739	1587.16	1401.69	825.701	1461.79	562.336	573.587	573.784
M268T481			0.18425	1.44395	0.200697	268.152	480.513	1357.52	1304.38	971.138	1283.48	1081.77	528.049	2526.52	1082.37	984.55	545.85	1994.25	2290.14	943.281	1004.18	1004.04
M150T362			0.225245	1.44381	0.09889	150.022	361.895	708.03	301.837	771.986	246.147	586.685	863.775	937.998	692.257	927.517	818.692	478.428	1167.33	433.164	456.413	432.887
M142T596			0.399582	1.44367	0.232473	142.085	595.675	1336.27	4532.71	6081.04	2713.34	7737.33	5259.69	8955.86	10676.5	3368.67	5910.36	8299.06	2721.92	10899.1	11793.3	11780.8
M432T879			0.269407	1.44351	0.214115	432.239	878.712	3068.5	936.607	1690.1	470.483	1227.09	711.667	1948.79	1916.4	1700.43	1483.13	1577.22	3072.88	1697.98	1697.96	1681.06
M559T50_1			0.155819	1.44325	0.503714	559.293	50.44	1909.48	783.245	2512.19	498.848	617.068	316.563	568.242	4458.13	970.292	417.177	1532.8	1632.8	241.123	220.43	223
M456T777			0.644832	1.44319	0.264009	456.076	777.389	1805.97	5224.35	6003.79	6416.13	6051.41	8783.69	4521.56	11710.4	5676.43	6328.04	4951.27	16292.5	5578.88	5422.94	5209.82
M523T335			0.225356	1.44306	0.264996	522.596	335.278	66.3456	84.4677	1777.34	617.92	1720.52	817.606	1267.98	1104.54	1566.84	1124.64	1157.68	1115.13	878.987	826.898	886.06
M329T693			0.778372	1.44268	0.309767	329.027	693.443	8081.29	3742.38	8839.85	6215.12	12812.3	6894.36	11617	2591.7	7192.32	20176.5	6206.51	19423.7	6028.62	6664.94	6631.33
M180T62			0.403692	1.44265	0.14268	180.066	61.736	1219.25	2451.96	2328.36	1706.8	1459.64	1864.03	1860.7	2617.06	2189.51	4765.06	1518.82	2961.38	2025.49	1814.3	2023.82
M621T294			0.364697	1.44259	0.384079	621.386	294.116	452.223	263.062	1455.85	769.755	1702.14	4781.11	1806.48	1660.9	2023.52	3064.65	1482.22	3557.36	1500.72	1588.01	1502.6
M402T604_2			0.169729	1.44246	0.033428	402.211	603.53	642.458	623.322	769.401	362.859	542.732	469.872	881.995	530.913	678.97	879.531	1136.33	811.978	1023.93	1107.43	1024.89
M118T643			0.51054	1.44239	0.114471	118.085	642.884	1621.39	2225.67	3153.1	4781.22	3844.7	4070.74	4203.7	4950.17	2844.79	5096.26	3614.47	7701.16	6896.7	7209.53	6606
M518T317			0.365818	1.44222	0.0373028	518.116	317.178	1701.1	2300.59	4201	2315.58	3544.97	3969.28	3691.85	4133.62	5626.32	3125.68	4680.8	4748.52	2729.73	2728.64	2795.58
M340T666			0.35244	1.44196	0.0570078	340.259	666.324	1820.41	1106.14	4507.42	2275.37	3011.05	2017.46	3959.63	3295.08	3272.39	3242.2	3425	4057.14	5923.19	6389.39	5977.46
M784T221			6.22524	1.44133	0.527828	783.571	221.03	80230.6	86001.9	426633	234002	607943	1.43472e+06	180639	578010	210713	619154	712571	1.83487e+06	588635	552936	588386
M789T82			1.03155	1.44112	0.164858	788.523	82.346	21675.7	12561.4	9522.96	13639.9	5539.75	10787	7188.42	15089.3	14704.5	24744	18422.3	26100.1	16108.8	15488.8	15499.4
M143T554			0.324707	1.44085	0.619138	143.034	554.085	2469.26	1704.27	1058.56	7331.42	2082.15	2277.73	1675.03	15140.1	989.644	1699.54	1456.79	3422.94	742.655	755.206	834.459
M366T272			0.629605	1.44069	0.177884	366.225	271.573	4228.38	7555.15	4174.85	1901.82	4460.41	9733.75	6357.43	3462.82	10071.5	7744.53	7099.02	11445.1	3972.12	2114.33	3915.7
M180T302			0.45013	1.44053	0.375658	180.015	301.961	5787.45	6610	2653.13	1072.22	11707.7	6663.27	11600.7	5708.86	16617.6	3329.51	10405.4	2027.11	4539.08	4886.22	4779.49
M905T345			0.515048	1.4405	0.434279	904.696	344.858	3418.06	8948.4	5328.49	5380.76	5093.18	3236.49	19454.5	5994.38	2753.44	10055.1	6025.51	956.544	18564.4	18865.3	17844.5
M377T727			0.546452	1.44047	0.391062	377.084	727.23	1375.96	2018.18	2901.12	3231.75	5323.32	8283.94	8722.98	3935.77	2505.41	3191.78	3006.99	11961.4	2794.15	2821.61	2803.2
M538T888			0.252971	1.44041	0.298425	538.155	887.812	4996.25	4449.66	3209.33	1944.48	3173.75	2978.13	3391.11	3194.8	11001.6	2309.18	3826.86	6167.24	1970.57	2092.61	2071.53
M701T359			0.383196	1.44032	0.369316	700.545	359.299	4315.5	3007.23	18134.8	18306.9	15291	9984.64	10019.2	5182.28	37002.8	11779.4	21256.4	14199.9	14896.4	10682.9	14759.9
M609T829			0.347923	1.4401	0.0506794	608.831	829.218	1333.9	1843.86	669.556	910.854	1261.87	935.332	1470.45	2094.14	1832.62	1515.14	1091.18	2012.91	721.43	822.975	704.936
M279T98			0.51426	1.44006	0.372669	278.989	97.61	7286.3	3503.25	2712.4	8421.66	2609.17	1423.91	14460.8	4985.97	5086.78	5505.55	3216.74	4123.26	3884.35	4103.15	4233.22
M265T51			0.338067	1.43957	0.329739	265.215	50.507	3267.74	3263.51	3821.79	3260.43	1463.28	2036.24	1262.54	1332.72	2181.67	7370.33	7139.57	5348.47	6261.92	6725.63	6714.99
M666T607			0.11505	1.43956	0.222576	665.783	607.129	603.62	641.183	430.983	450.653	764.856	571.134	708.043	696.605	624.498	1029.16	1638.98	287.106	406.185	405.764	462.443
M733T733			0.231438	1.43847	0.130046	732.846	733.484	692.274	471.807	1042.61	1919.29	1465.92	495.726	1515.43	1161.83	1119.33	1948.71	1363.87	1647.72	2749.5	2678.38	2746.88
M675T50_2			0.219356	1.43835	0.187125	675.473	49.723	644.624	417.057	1037.88	523.018	484.744	358.335	264.047	954.122	1107.75	1060.57	491.508	1106.85	619.681	714.704	617.6
M605T596			0.335464	1.43811	0.0617428	604.954	596.201	1477.44	1912.18	2140.62	1043.17	2037.14	1509.96	2482.07	2857	2386.93	3577.65	1759.59	1491.17	1243.21	632.663	1229.88
M223T49_1			0.230037	1.43809	0.174439	223.062	48.646	2966.25	2155.93	1500.91	4052.49	2254.95	3088.48	3653.75	5291.19	6520.87	2129.5	3202.22	2239.21	9236.24	9240.17	9422.04
M336T810_1			0.272928	1.43797	0.128178	335.666	810.073	1338.24	1066.47	1865.14	828.973	907.34	1052.41	2314	2334.94	1760.9	1696.45	1507.01	536.754	1076.22	986.07	1002.49
M411T820			0.251472	1.43766	0.0346777	411.079	819.586	627.96	783.535	684.975	327.979	816.715	1042.49	1097.94	853.723	1291.92	1177.44	741.642	995.797	847.795	846.091	895.327
M738T303			0.327992	1.4372	0.178668	737.529	302.833	4152.51	1835.72	2595.37	1536.03	2862.32	2050.72	3340.22	5166.55	5656.86	2323.38	1507.19	3610.72	1696.16	1663.03	1352.02
M693T316			0.86408	1.43718	0.0594664	693.479	316.029	14802.6	7488.61	9155.04	12671.2	11952.5	8945.62	21301.9	17358.5	11392.2	14665.5	9173.37	19547.4	12438.3	14068.2	12898.6
M651T736			0.247836	1.43695	0.0449723	650.845	735.813	612.124	886.786	1156.15	1050.45	1129.49	1094.04	1968.15	1356.48	911.284	1851.48	1312.41	1119.94	2235.14	2030.11	1997.9
M835T336			0.88765	1.43655	0.232264	834.528	335.682	14685.4	5811.76	9651.99	15239.5	4242.93	7222.13	11926.1	9360.27	5700.08	14181.3	15830.5	24674.9	13887.2	14354.1	13796.9
M684T544			0.23679	1.43625	0.13471	684.002	543.669	294.276	343.119	603.318	939.625	575.373	921.934	753.494	720.106	823.986	790.22	719.734	1474.49	1019.39	1073.73	1070.42
M287T1355			0.310755	1.43624	0.219972	287.221	1354.6	1688.51	1023.71	3216.2	1525.59	989.309	1559.63	2190.95	3623.23	1391.41	3892.02	1695.04	1573.97	517.183	1677.93	1734.74
M283T491			0.392427	1.43624	0.128183	283.029	491.169	957.26	1225.3	1226.34	2085.49	2963.43	1476.33	2370.74	2986.82	1462.94	2247.56	1710.79	3488.95	2781.52	2777.94	2927.93
M507T784			0.464515	1.43567	0.234612	507.17	783.627	2140.42	2789.15	1144.97	5288.47	2783.99	3895.08	4218.19	6034.65	2108.69	7300.63	2054.44	4185.86	6902.56	6888.06	7318.84
M785T305			0.416927	1.43555	0.184549	785.495	305.166	3574.37	6182.07	2835.24	1757.48	4262.56	2327.44	3740.33	7842.32	5492.39	2494.59	3634.6	6854.91	4144.55	4140	4268.4
M435T36			0.586905	1.43547	0.39073	435.099	35.5955	15300.1	6469.81	3031.65	3094.56	4255.52	6189.24	7680.75	3228.07	20269.6	9136.61	10120.5	4601.78	2733.69	2695.1	2689.61
M201T893_1			0.394732	1.43536	0.270994	200.997	893.237	1549.59	4255.79	2124.23	2899.28	2184.88	4402.64	6188.94	5093.74	2603.69	1712.7	2028.26	7371.44	4858.37	5077.17	4858.76
M842T86			0.504813	1.43528	0.292333	841.576	85.996	2689.79	5849.88	1368.4	3345.51	1508.84	11100.1	4222.16	4033.17	7489.4	8541.15	5676.72	7157.32	4316.11	3240.6	4306.21
M275T671			0.273079	1.43456	0.0500385	274.909	671.483	1025.07	935.295	1128.27	1176.67	1778.73	1459.5	2459.82	1434.63	1162.7	1597.49	1784.18	2325.45	2713.12	2391.97	2523.89
M741T736			0.658316	1.43452	0.32399	741.495	736.264	5315.8	4486.59	6751	6911.83	11377.5	7068.66	7629.49	5859.4	6423.59	23630.1	7500.33	9079.85	9870.33	10238.4	10242.9
M278T75			0.251185	1.43433	0.190066	278.345	75.346	2162.71	863.433	2106.97	599.539	1138.34	4014.84	2128.01	2949.58	3324.44	1796.25	2698.73	2716.89	2311.26	2310.83	2416.64
M497T908			0.253236	1.4343	0.129872	497.063	908.163	800.615	1151.61	1031.89	672.668	966.811	873.492	808.328	708.469	1977.92	1026.82	1983.26	1379.67	774.619	774.538	748.45
M671T569			0.355447	1.43429	0.1491	670.837	569.106	2066.31	2891.82	1588.72	2229.78	1328.97	3559.69	4986.27	3328.52	4264.42	1197.24	3111.97	2711.61	1331.39	1605.88	1609.64
M296T535			0.219343	1.43397	0.345182	296.216	535.194	189.236	326.625	701.441	1166.62	1405.88	497.463	851.623	390.01	622.283	1997.09	815.99	1470.82	1456.89	1465.69	1456.9
M211T52			0.677056	1.43385	0.316126	210.992	52.1885	625.65	17880.9	8743.24	5031.75	6832.36	6675.53	6455.44	9386.29	20401.2	13034.1	8389.09	7989.02	5852.78	5970.97	5971.36
M578T311			0.581419	1.43377	0.0354848	577.515	311.418	6280.41	6412.6	3483.87	3399.75	2344.25	3759.59	6694.53	6446.4	6124.68	5606.38	4790.26	7157.59	5672.82	5472.35	5293.08
M349T215			0.76319	1.43365	0.298363	349.201	214.697	6058.54	6249.75	6544.54	3295.81	9069.29	25362.7	11284	10794.5	20102	14609.6	7987.95	16338.8	7884.75	7583.18	7897.68
M487T531			0.230183	1.43349	0.168175	487.138	530.799	458.719	473.406	879.948	1315.79	963.486	685.17	1785.16	623.174	914.043	1325.87	1493.7	705.165	1376.48	1285.5	1381.67
M315T71_2			0.538921	1.43255	0.159857	315.231	70.6785	3710.27	2933.39	6454.94	1962.86	2120.41	2982.43	2856.96	4232.05	2996.53	6062.71	6131.86	6606.33	3303.17	3246.41	3600.89
M250T840			0.243247	1.43253	0.242795	250.097	840.42	1490.23	668.944	985.442	820.384	1362.83	759.861	1273.14	671.943	1009.07	1493	1299.4	2974.26	1056.2	995.989	1028.9
M537T13			0.263368	1.43241	0.308584	537.165	12.7905	4660.57	4296.16	2410.71	4888.94	4331	4364.51	4533.4	4159.5	14098.5	4659.28	3608.17	4682.58	4169.1	4168.62	4106.33
M422T61			0.437636	1.43241	0.467854	422.148	61.256	1378.86	2422.89	10345.4	1583.07	1570.57	2646.99	2193.4	10779.8	2861.59	3395.85	4896.88	4445.86	2762.85	2755.87	2755.86
M1179T681			0.184682	1.43205	0.117704	1179.48	680.726	252.991	706.837	1286.71	2009.15	1397.3	907.426	1803.63	1635.61	1339.31	1264.45	1990.73	1361.12	1251.43	1251.86	1336.92
M239T79_1			0.456685	1.43144	0.0683542	239.128	78.8	3747.39	3053.89	2173.22	2480.47	1582.51	2537.92	2448.7	3932.73	4299.33	5091.32	4252.55	2270.66	2552.92	2292.51	2363.82
M270T68_1			0.532174	1.43071	0.563594	270.048	68.3815	13743.9	10070.9	5088.63	1590.11	4975.02	4913.43	2261.06	6697.66	31969.5	5108.74	6115.67	5622.53	3848.1	3854.3	3301.11
M487T299			1.48546	1.43053	0.196423	487.304	298.652	49527	16393.3	21263.9	20232.6	54106.6	52910.9	19621.2	49982.7	83527.4	52355.5	47903.3	53364	28700.6	33175.9	30676.5
M545T49_1			0.521204	1.42983	0.219183	545.382	49.3085	6338.96	6432.12	1506.38	3970.27	1636.56	3324.65	5130.44	3516.16	3146.03	7560.58	5064.97	8766.62	3637.74	3812.42	3819.08
M929T748			0.284148	1.42962	0.198234	928.662	747.886	783.127	889.766	2188.53	1196.15	947.705	2790.66	1505.71	2081.55	1916.23	1459.93	2078.79	3532.61	3835.46	2972.93	3826.7
M583T869			0.398625	1.42936	0.0287191	583.057	869.363	1287.66	2581.99	1671.89	1562.83	757.494	1517.4	2656.92	2237.67	2280.05	1911.27	2177.08	2143.31	1633.85	1513.19	1638.22
M1014T716			0.578882	1.42934	0.0440327	1013.94	716.399	5734.71	4393.82	5309.93	6026.17	5929.95	7269.47	9272.59	6367.1	8802.11	12445	6824.69	5835.2	9116.05	8253.92	8407.02
M202T667			0.178375	1.42913	0.17487	202.179	666.741	722.366	244.595	1207.37	955.984	1132.16	1845.98	1456.89	1049.67	2432.09	1124.75	1293.41	1372.94	1906.32	1792.27	1791.53
M497T573			0.856066	1.42842	0.0637592	496.912	572.831	7017.94	7841.53	9237.64	9605.68	7442.38	13780.3	15464.6	9083.52	16469.6	15383.3	7250.75	14805	5051.84	8099.98	8248.03
M755T731			0.195573	1.42834	0.159974	755.091	731.429	393.589	441.088	894.597	845.902	665.8	548.94	557.089	1273.14	737.753	1483.61	588.06	773.633	601.516	562.983	601.744
M391T717			0.345697	1.42818	0.0207892	391.015	716.502	1250.25	1468.07	1372.87	909.396	1321.57	667.068	2174.19	1856.47	1636.81	1425.59	1620.16	1268.68	1460.5	1506.55	1506.44
M669T78			0.514587	1.42814	0.271398	669.392	78.057	6717.9	3165.22	11672.3	3099.75	4694.78	7153.97	6047.79	7436.15	16204	7524.65	11246.5	3673.66	6174.38	6173.77	6456.8
M809T256			6.43478	1.42813	0.189957	808.583	256.029	236597	355086	1.40391e+06	1.13243e+06	2.10503e+06	1.43086e+06	1.92704e+06	1.90557e+06	2.04896e+06	1.36638e+06	1.01468e+06	1.25428e+06	1.43534e+06	1.58824e+06	1.59141e+06
M632T80_2			0.367948	1.42804	0.0681072	632.351	80.3435	1555.66	1764.28	1611.53	1135.39	1303.77	1209.69	1602.38	1201.58	2128.04	2654.82	1653.09	3013.1	1253.4	1194.76	1186.57
M485T402			0.252152	1.42786	0.344675	484.785	401.536	715.143	562.622	2082.18	719.997	1772.68	1756.93	1329.13	3860.9	1216.13	1322.68	680.805	2455.69	632.827	483.885	655.834
M265T840			0.433284	1.42782	0.140887	265.069	839.563	1975.17	3184.26	3645.76	1679.6	2925.38	5270.59	3262.92	2815.49	3983.21	4414.21	4925.34	7271.51	2659.79	2432.86	2653.74
M179T307			0.286531	1.42749	0.212212	179.019	306.693	1910.56	665.498	610.022	1550.76	1969.54	2168.01	2799.23	446.816	1908.03	2463.65	3107.26	1943.09	1964.72	1971.92	2040.99
M758T81			0.436936	1.42743	0.043665	758.148	81.352	3953.66	4281.78	4784.62	3303.1	3708.52	4068.24	4980.64	4287	9123.14	6010.15	4879.03	5120.92	6097.96	6316.45	6051.75
M574T623			0.263377	1.42727	0.0114936	573.777	622.94	1170.3	1091.4	886.736	945.569	1080.4	1747.37	1680.83	1265.36	1918.45	1867.05	1638.68	1508.84	1195.18	921.961	1177.99
M705T398			0.743953	1.42717	0.590816	704.576	398.323	12481.5	14552.8	8699.36	6721.78	10921.8	13359.7	5539.72	5332.71	15260.5	3402.96	8349.61	57359.4	4269.09	4274.24	4570.78
M821T623			0.31638	1.42714	0.121245	820.698	622.649	1891.95	566.906	2160.73	2706.2	2365.4	1740.94	3908.78	2640.67	1157.43	3288.11	2687.76	2632.54	2059.53	1837.79	2054.7
M162T599			0.21111	1.42714	0.304027	162.111	598.659	589.385	1197.81	1522.01	1428.1	3116.09	990.076	4373.51	1808.72	1388.45	1501.62	1823.22	1725.34	2049.66	2334.45	2059.51
M609T352			0.766754	1.42703	0.162555	609.386	352.11	6872.02	5178.72	14160.2	3190.41	8653.51	13643.5	16421.4	14289.6	8289.42	14956.8	6529.71	13288	13756.2	14929	13738.4
M634T76			0.316591	1.42687	0.0149085	633.519	76.43	786.005	1395.16	1807.79	1440.34	1523	1707.02	1426.21	2270.95	2178.03	2418.3	1820.92	2241.28	1696.02	1593.15	1590.41
M621T305			0.371522	1.42677	0.0953378	621.485	304.728	3828.38	2880.96	2702.7	1755.7	1677.02	1024.68	2785.11	2747.64	2599.29	3292.54	3531.8	4832.13	3449.46	3609.16	3611.53
M325T69			0.207426	1.42634	0.221973	325.106	68.972	802.91	801.419	379.483	868.573	1096.51	495.47	556.391	876.932	1379.68	1933.4	1052.95	539.826	756.167	587.155	548.217
M184T301			0.731382	1.42554	0.275261	184.072	300.978	31689.8	36806.9	26094.8	14290.7	30144.9	30563.5	57901.9	21672.7	79314.5	16423.2	40815	25630.8	22261.6	22272.7	22647
M398T1065			0.371097	1.42526	0.304128	397.66	1065.13	4679.44	1826.59	1635.23	1876.9	556.626	1471.02	4547.4	1686.59	1564.86	2676.93	4465.88	2226.72	1881.97	1748.46	1741.22
M264T733			0.494462	1.42523	0.0402744	264.079	733.042	3105.41	3261.14	5184.9	3339.27	5746.83	6582.85	8000.75	6908.52	5603.96	7514.49	6434.97	4332.71	8616.48	8803.44	8798.02
M367T732			0.558449	1.42509	0.107383	367.061	732.395	2913.76	2487.22	5827.42	6020.79	6621.92	7842.2	7583.15	9430.11	6380.38	10974.1	5558.02	5268.42	8061.14	8056.59	8280.42
M810T270			7.3216	1.42445	0.193956	809.586	270.075	413026	635893	1.18869e+06	2.05072e+06	1.15421e+06	2.05297e+06	1.43301e+06	1.78004e+06	2.96288e+06	1.69942e+06	1.11813e+06	1.68351e+06	1.04574e+06	725567	1.04128e+06
M609T369			0.307754	1.42418	0.306443	609.464	369.058	560.645	858.303	2587.31	2465.46	4287.47	1650.9	3085.52	998.834	3466.74	2211.52	2549.45	5362.18	6506.99	6533.23	5769.07
M449T329			0.212476	1.42412	0.65777	449.344	329.439	46504.8	12950.4	33180.6	4345.22	26553.9	30367.4	22272	8081.15	151253	11141.5	13443.1	12984.6	13930.2	14320.9	13929.5
M693T734			0.475457	1.42395	0.185699	692.855	733.518	756.405	1229.59	3821.93	4091	4501.2	3673.06	3727.94	4585.37	3314.74	6493.06	2256.3	5357.93	6149.51	6362.56	6380.17
M889T636			0.730863	1.42362	0.0863766	888.99	636.379	4130.41	5538.58	7199.2	11708.7	2953.18	8318.86	9682.89	8827.93	11222.3	11317.7	6520.94	9158.13	25575.3	11670.4	12900.6
M199T779			0.470382	1.42289	0.195113	198.972	778.836	5401.2	1777.65	5727.08	6246.47	2574.17	5913.63	7809.96	7672.87	6568.76	3541.69	3090.87	10644.7	3799.56	3397.48	3775.13
M739T77			0.466738	1.42282	0.536984	738.506	76.5855	1643.53	2335.31	5192.76	4464.78	5710.03	30365.9	9062	8084.12	27187.3	8147.66	6192.23	12058.3	9991.72	8166.25	8502.5
M545T674			0.14651	1.42279	0.250142	545.109	673.615	382.924	151.393	814.868	350.765	363.081	858.419	751.43	765.69	499.161	1085.4	839.772	215.154	613.025	617.323	656.804
M228T59			0.257639	1.42267	0.109695	228.111	59.2315	751.189	1282.96	411.085	606.925	684.774	369.182	1153.99	561.743	917.223	913.534	1180.59	1114.58	1062.62	949.567	1061.62
M583T227			0.313351	1.42267	0.123174	583.356	226.603	965.888	1396.42	1331.12	460.385	829.137	994.017	1125.34	2028.34	784.008	1373.83	1169.97	2021.77	1288.04	1291.46	1114.18
M875T48			0.321685	1.42253	0.220963	874.7	47.7045	1476.65	2438.92	588.902	741.097	1014.92	1312.8	1524.84	1633.45	792.527	2801.63	1473.06	2547.74	1618.17	1619.03	1703.44
M282T69			0.289335	1.42207	0.216336	282.134	69.4075	1640.47	2393.48	1132.15	1231.43	2939.9	1353.61	1039.1	4200.61	1585.56	3341.07	3035.68	2001.41	2057.77	1813.29	2059.65
M147T514_2			0.382053	1.42202	0.274154	146.965	514.322	3092.13	1914.41	3850.87	2703.4	4315.19	2598.95	3026.59	3436.59	2843.1	7066.28	8193.11	1706.09	12255.5	12270.9	13106.5
M762T779			1.86498	1.4217	0.0434519	762.27	778.545	30051.9	32559.1	58283.9	54872.9	61596.3	66264.8	75334.7	78753.1	64338.6	98352.5	49268.5	65620.5	109048	109037	113029
M230T62			0.516001	1.42153	0.180741	230.048	61.699	3341.4	4182.32	1035.13	3978.35	5179.29	940.173	2913	3735.97	3302.47	6645.19	4723.34	5201.01	4181.23	3745.13	4163.97
M692T81			0.302109	1.42138	0.376199	692.464	80.952	2726.13	1153.08	1552.15	717.724	677.063	498.156	663.291	3496.81	1047.47	1087.01	1583.83	2532.17	1186.73	1123.37	1114.49
M740T776			0.969379	1.42133	0.0977285	740.492	776.27	5353.37	9418.79	12462.9	14224.7	11094.8	9205.5	14412.1	8371.7	12698.8	19364.5	11473.9	21460.4	18667.2	18048.4	25612.7
M883T421			0.232485	1.4211	0.315288	882.979	421.24	709.252	21.5199	1897.76	1084.99	2351.39	1572.49	2974.59	1547.44	756.042	2229.37	2509.69	836.349	2400.07	2465.69	2463.93
M136T36			1.22105	1.42056	0.286195	135.97	36.396	20367.9	26805.6	37092.7	15561.3	21239.5	22695.3	29469.3	24868.8	26177.4	75901.5	22894	24911.7	31978.7	32014.3	29033.1
M712T74			0.475038	1.42011	0.0869897	712.418	74.3665	1668.27	4018.91	3036.99	1515.96	3719.95	3834.61	3793.66	4922.01	3078.14	4156.82	3186.22	6133.64	2885.95	2900.98	2612.45
M139T50			0.335914	1.41986	0.320812	139.005	50.386	2850.06	967.762	1089.45	1592.91	4150.53	4013.38	4902.87	456.642	4585.94	5462.13	1945.29	3468.1	2539.34	2544.15	1934.84
M246T526			0.693876	1.41946	0.172253	246.094	526.034	8701.86	7843.41	6344.84	2766.86	7610.29	11567.6	8831.45	8523.3	12712.6	9995.43	5488.27	18090	4371.95	4464.5	4372.33
M1043T679			0.58657	1.41938	0.0447672	1042.97	679.025	2083.17	9205.74	5951.53	8111.25	7364.28	7304.61	8846.9	7960.33	8515.72	8341.5	11669.3	11470.6	17057.2	17113.4	15444.9
M628T48			0.566155	1.41926	0.121689	628.493	47.615	4290.51	4582.84	9059.16	10406.5	4868.76	3390.51	9145.45	6739.74	5096.79	11040.2	9184.34	10736	7533.07	7615.73	7571.25
M337T69			0.196721	1.41896	0.325016	337.309	69.139	897.002	771.887	585.487	789.585	1949.23	1395.5	1227.8	1470.23	569.857	2821.32	2375.7	600.402	1144.4	794.896	734.397
M512T586			0.338866	1.41879	0.0227161	511.899	585.931	2368.71	2787.26	2299.37	2908.75	3779.28	2462.8	4427.57	3160.79	3254.36	3799.87	5504.05	3414.01	5484.51	5482.65	5563.33
M631T334			0.259491	1.41876	0.317671	631.388	334.186	780.19	746.506	2993.32	420.871	2348.76	1461.04	1674.83	3625.89	2125.7	1219.25	2765.65	1003.84	751.946	853.362	850.589
M564T72			0.972076	1.4177	0.101746	563.502	72.285	9415.02	8263.81	20076.6	6211.1	7115.39	16451.7	10260.7	16957	16836.6	16967.4	15728.1	18992.8	15833.9	15768.6	13680
M495T285			1.69309	1.41761	0.102364	495.116	285.468	6255.23	51604.3	43106.2	21524.9	39660.5	53409.6	47842.1	43774.3	67072.1	45251.2	46926	54716.1	41445.1	41429.1	38645.8
M264T817			0.534618	1.41759	0.30012	264.039	816.547	923.107	2867.54	5912.04	3899.54	3945.97	4299.37	5161.37	3360.79	2571.91	6827.9	2788.9	10260.1	5686.81	5873.7	10423.8
M346T77			0.46808	1.41754	0.307306	346.33	77.069	2200.26	1945.37	5764.94	13707.1	3846.41	2874.55	6647.11	8030.74	4788.02	6596.64	6776.41	10167.2	3339.6	3341.88	3510.29
M281T831			0.39524	1.41729	0.179167	280.846	830.821	1547.62	772.251	3413	1190.46	3282.73	2368.21	3682.69	3481.2	1269.18	4010.94	2710.01	2667.42	2315.26	2277.07	2315.39
M299T79			0.299923	1.41673	0.51498	299.276	78.6785	3490.24	2315.48	9557.86	4324.43	7225.17	4046.41	21749.3	4599.76	6991.44	1501.45	5662.15	3357.17	3583.7	3544.93	3162.87
M398T75			0.478538	1.41646	0.155658	398.361	75.248	4805.99	4435.88	3019.82	2186.38	3473.97	2622.71	4230.94	3824.29	3066.19	4964	4219.41	8796.02	3131.64	3014.27	3129.59
M562T73			0.490086	1.41598	0.139564	562.488	73.0925	2994.58	3091.67	6559.91	1555.85	1712.1	3428.78	3921.54	5435.08	3759.55	3890.11	6078.49	4304.42	3841.52	3836.92	3641.02
M738T426			1.35736	1.41578	0.233247	737.563	425.566	33513.3	50517.3	37784.8	41114.2	41866.8	42258	105153	46076.9	38093.7	83633.4	62037.6	14779.7	38032.7	38187.3	38032.5
M591T732			0.419105	1.41506	0.171897	591.088	732.395	1314.72	1334.83	4052.4	3393.47	3513.63	3370.56	3654.09	5410.08	3312.33	6272.27	2045.01	3333.35	3314.35	3254.35	3316.31
M213T796			0.207034	1.41458	0.233146	212.961	795.795	671.813	663.611	835.332	1044.55	1365.04	1232.44	689.95	1330.71	2362.83	996.68	2120.91	721.584	1074.9	927.18	1079.38
M191T364			0.447748	1.41453	0.186155	191.019	364.493	5552.06	3119.79	3792.91	1858.5	2810.62	4056.13	5443.6	4490.16	8684.66	4874.16	4610.5	1870.75	3053.2	3121.76	3089.42
M983T689			0.984861	1.41424	0.324409	982.97	689.193	6453.79	14037.3	12919.9	8673.68	24081.4	11926.7	12837.8	9838.67	9049.58	28981.5	13960.2	35773.8	16966.7	13475.3	13845.5
M147T381			0.31227	1.41416	0.132486	146.965	381.151	1205.46	843.402	1292.34	1672.07	1741.83	1559.32	2834.41	1211.83	1408.45	3054.08	1453.42	1795.75	3482.49	3371.91	3481.64
M625T50_2			0.559283	1.41408	0.473072	625.481	49.872	3340.11	30031.7	3291.38	1633.11	5998.57	18607.4	23337.8	19101.8	19417.6	4423.13	19183.7	3484.78	8303.05	12004.2	11991.1
M248T76			0.256951	1.41397	0.362246	248.174	75.7715	298.767	1251.67	1694.51	406.32	2196.92	2976.53	1645.35	155.708	3107.57	1621.26	3126.1	2821.9	1667.12	1751.38	1744.98
M659T842			0.318738	1.41364	0.0925179	659.25	841.681	959.903	1802.68	1008.17	400.196	1046.35	671.293	1115.42	1840.91	1462.23	1316.23	1232.35	1357.22	652.316	623.492	652.37
M659T500			0.271145	1.41348	0.240276	659.253	499.769	1112.07	1396.87	2244.61	969.645	1635.54	1719.31	3985.1	2075.64	2399.88	1881.06	431.217	2058.7	1758.8	1627.34	1757.91
M523T781			0.96503	1.41345	0.194153	523.178	780.812	19011	36023.9	58326	50910.7	17461.2	72058.8	81790.8	79137.6	68127.9	27333.7	60937.8	41393.7	81684.9	81699.8	83103.3
M949T688			3.84261	1.4134	0.179844	948.984	688.084	200614	112369	405168	457390	688587	363686	626406	815333	398440	445742	427901	434977	464731	500279	499939
M443T910			0.24558	1.41337	0.0139672	443.079	910.159	1000.8	1192.39	837.734	1004.58	1126.41	1572.6	1280.23	1543.93	2058.49	1306.06	1620.52	1709.12	982.001	996.124	982.586
M357T737			0.554935	1.41336	0.110701	356.912	737.264	2657.91	2684.97	6085.33	11863.7	8437.7	7672.94	7704.61	7584.69	9801.12	10261.7	10744.7	9593.2	13275.3	13272.6	13419.5
M605T309			0.573425	1.41305	0.0188508	604.536	308.901	6254.83	4384.18	3629.17	4246.27	4131.42	3291.38	5646.75	7295.54	4861.71	6471.65	4851.43	7523.45	4860.83	4519.11	4529.05
M827T313			0.602363	1.41303	0.344686	826.592	313.268	8242.85	5210.21	5361.04	4909.74	10113.1	12746.6	7194.58	7571.82	8128.04	5470.77	12481.8	24976.9	15037.4	11013.3	11371.1
M376T720			0.529289	1.4129	0.20088	375.965	720.317	12661.7	6571.1	5678.31	6597.63	7491.04	2277.78	6676.7	13422.6	15083.6	8344.12	5386.88	9407.01	9114.69	9164.75	10211.6
M511T892			0.209692	1.41285	0.393936	511.064	891.558	915.117	2426.78	1145.27	389.667	576.847	778.205	830.221	2993.04	2202.84	1092.01	619.251	1067.32	556.08	562.906	563
M233T104			0.570021	1.41268	0.524191	233.037	104.144	7892.06	9448.43	7159.44	8841.73	7008.86	9369.89	11098.1	11163.5	2389.05	36358	6012.85	3217.62	3640.91	5577.53	5606.42
M831T74			0.577811	1.41266	0.144117	830.516	73.586	4172.67	4275.18	3763.51	3903.11	4232.06	4915.48	6147.79	4072.39	4260.02	7825.1	3209.97	10171.3	4753.64	4748.61	5035.6
M271T35			0.25113	1.41244	0.653633	271.059	34.616	10300.2	7608.93	2250.8	2208.41	2164.82	590.679	4104.04	4370.26	22576.6	592.16	1193.95	2648.88	751.973	690.802	751.239
M604T675			0.392657	1.41243	0.0775292	603.93	674.78	787.214	1466.5	2559.35	2412.93	2991.98	2961.11	3377.15	2807.59	2089.52	3776.36	2673.15	3890.75	4299.25	4298.05	4424.44
M275T75			1.17788	1.41226	0.0885142	275.2	74.531	15482.5	15467	17610.9	4417.46	15505.3	22886.8	18246.1	24128.9	19741.9	29847	13906.5	23167.9	19665.1	19690.7	20184.6
M515T775			0.648193	1.41199	0.381902	515.326	774.533	2884.2	5465.23	4570.09	9233.27	3176.49	5743.18	6549.07	5583.76	4785.01	5902.73	3310.41	17743	6116.76	6578.25	6335.34
M431T50_2			0.48685	1.41174	0.119309	431.268	49.84	7814.76	3843.3	5229.42	1717.9	3728.36	2811.61	4005.5	7274.05	6080.6	5494.75	5275.03	7368.74	2859.89	2458.11	2859.19
M189T701			0.329307	1.41166	0.347933	188.939	700.75	2504.96	285.549	1600.28	1233.2	5098.83	2255.66	5053.76	1589.37	1486.08	2247.35	4232.03	3712.61	6556.11	6452.72	6493.42
M717T75			0.311195	1.41151	0.176144	717.467	75.0935	2455.56	541.599	1491.9	1197.42	390.406	1503.45	1090.81	2112.89	1743.46	2020.61	1448.59	2283.39	1337.64	1353.02	1243.96
M621T595			0.313368	1.41141	0.170345	620.928	594.587	843.167	3995.08	4025.48	3219.12	2567.39	1647.67	1969.68	5207.9	4807.87	2594.86	3596.25	4826.4	3684.59	3684.38	3944.32
M310T77			0.53274	1.41118	0.330379	310.212	77.2345	3238.55	6709.02	2432.75	2711.35	1877.96	3681.04	3401.06	3543.21	3770.5	5171.16	2676.12	10579.8	3268.21	3297.24	3403.38
M425T791			0.318184	1.41109	0.0907627	425.174	791.328	1878.59	1129.03	1389.92	1155.69	1702.5	1606.66	1874.89	2005.19	1510.59	1955.01	1628.83	3531.11	1877.39	1724.57	1731.84
M433T78			0.448842	1.41108	0.0529238	433.328	78.323	1703.37	2448.55	2288.08	1069.18	2542.72	1752.81	2299.67	2715.4	2200.34	3111.79	2296.42	4033.73	1954.06	1896.62	1895.56
M542T388			0.631744	1.41051	0.351785	542.323	387.812	10616.2	9072.61	17529.5	7233.72	24664.2	17700.1	10958.8	11387.6	29186.5	5702.45	24613.6	40606.2	3910.54	3916.11	4006.58
M363T796			0.25496	1.41036	0.00142891	362.985	796.272	625.576	615.726	724.206	649.798	648.196	381.656	867.533	845.634	860.826	847.096	981.217	738.692	705.702	753.154	713.136
M317T673			0.573327	1.41024	0.00316028	316.92	673.133	5611.94	4689.09	5350.68	5665.69	6229.79	6360.62	6281.34	8339.61	8132.34	6532.43	8753.8	9778.61	9397	9046.07	9395.08
M845T629			0.261798	1.41017	0.045657	844.605	628.665	1605.79	1255.32	1105.2	1249.93	1116.94	927.853	2321.95	1455.12	1194.47	2122.99	1923.63	1221.15	1256.32	1263.46	1359.12
M837T82_1			0.341026	1.41001	0.198237	836.524	82.201	1839.88	1989.36	1980.04	2939.24	800.042	2582.04	1369.16	2780.72	2386.19	3796.85	4849.95	1921.47	2408.74	2493.37	2491.44
M530T339			2.00726	1.40976	0.489227	530.3	339.23	111427	106887	120651	34139.6	109112	81474.6	49779	48361.7	80160.5	40783	350246	225339	204506	204547	208993
M148T666			0.251605	1.40941	0.0418248	148.096	666.337	1693.32	682.779	2227.62	1345.25	1501.97	1003.74	2273.91	1560.87	1803.42	2098.09	2244.48	1935.38	2320.79	2198.91	2196.89
M217T741_1			0.298761	1.40934	0.279319	217.008	740.953	1873.4	2399.75	1263.76	653.32	2548.21	1566.24	2039.89	1095.15	3325.13	1632.12	4662	1768.49	980.552	965.471	965.25
M780T674			0.319287	1.40914	0.000722234	779.92	673.942	1140.46	1301.2	1722.19	1691.62	1868.46	1631.49	2056.29	2039.48	2280.09	2469.74	2081.4	2256.15	1952.12	1801.79	1950.76
M527T835			0.501483	1.40878	0.373198	527.158	834.549	5618.72	5941.63	4328.22	7751.2	5669.58	3950.76	7407.58	6170.1	7236.61	2988.33	3972.13	19081.3	2534.91	2700.59	2700.55
M802T586			0.205123	1.40852	0.0244401	801.871	585.769	406.656	876.884	752.117	698.47	794.895	1028.2	1103.37	717.506	1000.88	1237.66	1264.54	1094.98	1671.63	1683.2	1819.32
M249T1311			0.38861	1.40845	0.201088	249.099	1311.12	2557.24	2092.66	5306.48	2525.21	982.219	2419.43	3260.63	3880.93	2637.92	4291.64	5938.12	2361.56	1988.84	2201.49	1998.7
M195T783			0.612391	1.40825	0.613088	194.906	782.957	1382.29	1998.99	2789.88	9410.29	49667.6	10083.2	39932.4	2981.37	2896.11	13257	32204.5	14815.2	10717.6	10786.7	12197.4
M127T697			0.324711	1.40821	0.273116	126.904	696.534	560.534	895.516	1253.65	1463.36	2232.65	1229.44	2307.29	2456.97	452.362	2128.28	760.463	2646.58	2643.14	2587.39	2586.72
M564T484			0.241048	1.40814	0.201252	564.263	484.112	1984.02	1630.56	2382.53	1273.9	1118.93	309.234	2875.08	2485.76	1231.93	958.612	2156.67	2541.6	1173	1393.3	1171.55
M244T504			0.201228	1.40803	0.445402	244.153	504.276	2298.65	3026.19	987.743	1357.67	812.68	950.13	4496.34	826.144	1510.89	470.413	4348.89	1629.35	3969.05	3968.88	3584.76
M986T653			1.00544	1.40782	0.0115271	985.507	652.558	7352.22	11823.4	9682.91	10346.2	12790.2	6718.17	11577.9	14400.8	13293.2	16884.2	11566.5	14935	13179.1	17220.9	13386.4
M317T78			3.21123	1.40743	0.0482467	317.211	78.057	105450	115086	171191	33286	131754	136223	169531	164328	184989	184067	130289	142127	109546	111593	111585
M626T50			0.217627	1.40668	0.398373	626.448	50.4855	5417.94	4912.53	2997.5	931.874	14189.7	13353.2	12849.8	4238.46	15085	4644.66	16475.4	5510.05	9447.7	6704.21	9425.7
M909T293			0.297164	1.40648	0.0272666	908.612	293.127	1761.92	2150.51	933.13	1633.04	1605.29	1916.52	2111.57	3190.49	2411.25	1817.46	2541.92	1992.65	2914.76	2910.94	3040.05
M327T898			0.237544	1.40616	0.133019	327.049	898.42	688.733	1302.2	704.397	342.494	1083.26	1199.41	1544.87	1364.68	1736.2	1261.8	864.542	709.365	1128.37	1083.94	1013.46
M1056T639			0.755706	1.40585	0.0856932	1055.53	639.401	1979.86	5675.94	7234.31	8761.78	7332.5	7451.77	8643.18	8789.09	9798.96	7567.85	6164.86	13071.5	7026.02	7039.63	7474.41
M300T750			0.660146	1.40571	0.16349	300.085	750.377	4736.14	5553.24	13689	5412	12898.9	14364.7	15503.4	15303.2	15716.6	13238.5	14918.2	4958.88	11896	13088.4	13033.2
M280T832			0.613499	1.40568	0.0287429	279.95	832.008	4008.78	4948.38	3574.79	2198.8	3857.68	3008.36	3407.78	5970.24	4477.76	5783.44	4706.47	6012.51	3121.43	3564.77	3552.41
M764T309			1.16234	1.40514	0.00999383	763.593	309.085	23627	27372.9	25266.6	18100.3	24544	28118.1	28703.8	33917.4	35704.4	25411	38544.9	44315.3	33748	35839.3	33651.3
M329T77			0.393028	1.40504	0.788235	329.149	76.777	4938	3594.82	3048.77	2522.81	5654.17	141542	3851	5027.96	198329	7225.29	4940.77	7260.61	7751.31	7750.7	7684.43
M381T734			0.427727	1.40492	0.391018	381.078	733.618	5178.79	7190.59	2935.69	7476.36	2877.16	3640.55	9436.05	5536.28	5617.02	1589.11	3457.24	15527.2	1731.24	1689.21	1693.68
M961T713			0.94267	1.40458	0.0746026	960.964	712.981	18111.9	7163.06	18136	10369.5	19578.9	9613.34	17890.7	20749.7	18832.3	24554.2	12119.2	22395.5	29458.3	38692.3	38617.3
M865T215			0.677641	1.40452	0.418754	864.574	215.375	1542.51	456.798	18387.7	9736.78	5317.1	17124.5	6917.72	16229.9	6554.81	23459	13769.2	6898.51	17201.6	12378.5	14322.4
M135T616			0.363257	1.40444	0.210352	134.865	615.761	1323.33	1594.48	3576.01	1499.1	2670.72	859.621	2256.41	2709.24	3188.14	4376.82	1466.24	2186.85	2324.9	2183.08	2180.58
M247T856			0.232499	1.40437	0.123546	247.057	855.658	420.111	1133.33	931.176	527.12	1007.15	627.948	936.215	1294.4	1676.07	876.432	1064.57	678.19	640.381	683.088	681.103
M281T894			1.13926	1.40409	0.03191	280.963	894.165	12533.1	21969.3	22514.1	8899.71	20608.1	18421.2	21698.1	29610.3	22484.6	26640	18854.5	28065.4	19380.2	18599.8	19380.1
M391T685			1.34169	1.40407	0.167543	390.993	684.848	17606.4	9414.11	38928.6	21899.2	32717.3	36324.8	33128.7	46608.9	35612.2	43535.3	13375.7	48024.4	35875	35802.2	28593.4
M323T814			0.30252	1.40405	0.204715	323.027	814.035	1595.59	926.083	1985.34	1679.61	2017.49	851.307	2714.74	1504.2	3026.23	493.304	2872.28	2103.49	1270.74	1441.96	1266.76
M653T586			0.198428	1.40396	0.225136	652.879	586.218	1650.27	1533.91	1792.84	1929.99	2047.17	1573.97	3526.97	1439.66	1143.35	2330.84	4561.1	1779.16	3795.13	3698.54	3794.04
M304T668			0.186002	1.40387	0.117253	304.061	667.692	766.321	501.462	1326.86	1387.21	1708.11	1731.03	2209.48	1667.4	1635.09	1821.23	2237.75	847.168	2956.01	3109.82	3109.3
M411T62_1			0.33463	1.40378	0.387697	411.192	61.697	2196.72	2370.21	686.949	3226.64	1554.77	4776.03	1830.24	945.622	6310.29	6018.04	1808.21	3879.35	2338.97	2312.43	2338.46
M242T841			0.234243	1.40373	0.12107	241.993	840.578	934.156	1131.53	1168.71	634.634	663.535	993.353	1894.43	1274.48	1704.41	1100.87	1275.16	507.554	1555.82	1701.62	1558.56
M299T69_2			0.210375	1.40372	0.434066	299.11	69.031	1039.87	536.438	3574.25	899.546	1322.03	725.7	4125.6	989.086	1521.55	1431.07	2298.1	1001.71	1205	998.468	972.801
M603T732			0.843225	1.40344	0.0677684	602.921	731.625	3409.4	12712.8	12589	12833.2	7592.83	12820.4	13445.3	13248.5	13662	15521.7	11124.6	19951.5	15991	14904.5	14270.2
M436T593			0.28391	1.40332	0.121587	435.979	593.203	1784.97	1732.82	2973.87	1965.18	5364.83	3368.59	4349.95	2959.99	4882.79	3861.39	5088.96	2980.41	4686.42	3460.25	3339.91
M675T50			0.499379	1.40301	0.430689	675.469	50.055	4857.82	12300.8	2032.85	7763.82	1793.88	1565.27	6906.12	1982.99	1907.75	10611.3	9306.14	11817.3	5240.83	1841.83	5199.51
M1043T642			3.20092	1.40286	0.37719	1043.05	641.779	34545.3	111904	229219	117523	100367	127614	109001	179375	95172.9	134386	105225	388541	115814	117810	128281
M833T195			1.94419	1.40239	0.354771	832.584	195.144	13542.7	19750.2	287135	207968	116467	163548	104163	83910.7	247358	172937	302895	222440	159724	160526	189593
M398T534			0.500081	1.40223	0.0541231	397.662	533.909	3373.45	2389.22	4140.16	4702.53	1116.27	3499.65	5387.54	3928.04	4001.36	5149.43	4624.92	3861.45	4080.11	4078.88	4209.96
M540T381_1			0.534484	1.40207	0.104059	540.247	380.534	3421.24	5564.29	1931.49	2193.78	4643.76	5184.89	4345.93	7079.49	3657.78	6897.5	4447.55	5734.38	1768.22	1826.76	1771.14
M459T697			0.262042	1.402	0.0976356	458.906	697.343	733.523	699.324	1033.81	1074.02	854.887	898.917	2001.27	1106.97	653.864	1324.63	1000.4	1335.74	1312.77	1484.89	1258.1
M589T49			1.25653	1.40189	0.28053	589.481	48.734	25386.2	46754.6	14140.7	9256.73	13504.8	16050.4	19845.5	28897	16443	46205.8	24398.3	39577	24989.1	25583.2	24979.2
M806T78_1			0.349853	1.4014	0.306626	806.458	77.5715	7935.03	2098.16	7783.61	1351.56	6082.9	5561.17	3364.43	9193.49	8074.41	2265.04	7991.48	12291.7	5551.64	5816.48	5833.3
M195T802			0.367679	1.40079	0.111906	194.906	801.592	899.677	3121.39	1798.66	1765.48	1651.55	2872.08	3411	2666.45	4050.8	2640.21	1939.53	2253.98	4012.9	2731.37	3075.49
M410T273			0.262709	1.40023	0.291144	410.06	273.315	754.84	447.653	1543.27	1312.26	1835.9	2083.59	2906.2	1334.96	2682.88	2209.3	219.997	1817.04	2056	2201.01	2060.3
M276T74_3			0.415362	1.39967	0.219769	276.333	74.412	2864.72	2463.77	3973.55	2158.39	2999.82	3791.43	2884.48	6897.42	3805.12	6972.83	3058.55	1928	4992.49	5361	5001.93
M676T612_1			0.185783	1.39965	0.0761519	675.84	612.408	1116.28	1153.6	1480.79	1556.41	2165.6	1767.62	2583.66	2376.63	2747.98	1186.26	2552.99	1485.61	1303.18	1312.63	1317.74
M319T76			0.480557	1.39934	0.195241	319.144	76.2225	4625.36	4077	1621.61	2080.39	1651.13	6378.17	3891.02	3213.93	3812.73	6846.41	4801.77	6027.87	1564.93	4194.6	4239.55
M124T628			0.476098	1.39885	0.706603	124.007	627.58	18454.2	13410.5	9843.93	4920.86	14243.1	4883.88	70575.9	4926.59	2293.97	4180.89	6543.26	3463.21	5357.75	5472.51	5786.44
M387T849			0.211842	1.39883	0.424722	387.152	849.293	1449.28	4732.92	503.557	1457.25	5294.36	883.157	825.995	4199.91	5192.17	4490.43	4244.1	1079.32	3985.28	4213.19	4210.82
M675T797			0.239211	1.3987	0.489543	675.176	796.755	1042.74	1827.96	562.974	418.552	797.919	617.479	609.309	605.602	1264.8	582.355	942.811	3362.95	338.009	419.985	419.269
M293T79			2.92914	1.39836	0.211009	293.211	78.955	102618	91021.5	95104.4	21456.6	100854	212622	132164	128151	96520.9	179830	118319	217142	101059	104365	104335
M734T306			0.391966	1.39798	0.187944	733.547	305.88	711.994	622.399	2171.45	3832.69	1760.46	3806.46	2365.92	3369.85	3017.15	3532.01	2992.34	2764.3	4042.7	4251.32	4049.06
M119T682			0.986231	1.39793	0.150033	119.016	681.738	12172.3	23129.8	7227.08	5761.37	12550.6	13898.8	12065.8	25780.1	18390.3	15601.7	18531.1	14112.1	12677.8	14951	13343.6
M311T80_2			1.57776	1.39765	0.154353	311.221	79.644	35649.9	41148.4	23483.6	11161	20813.6	33803	29882.9	36977.4	27020.5	59133.9	27830.8	51248.3	33434.6	33455.2	35102.8
M1049T695			1.42044	1.39752	0.134407	1048.53	694.657	9524.48	37536.8	52663	19971	36678.2	47015.9	45074.3	43047.4	46559.8	70666.5	35761.3	43131.4	33311.3	39702.5	39637.3
M93T1262			0.434495	1.3966	0.19628	93.0091	1262.41	2092.61	1832.59	4226.7	2341.11	5151.64	3637.81	7521.38	2288.08	3547.38	5551.94	3910.65	4110.51	6961.04	6571.82	8297.9
M483T61			0.326843	1.39649	0.150113	483.248	61.352	3593.46	2306.51	3077.82	1567.08	1428.62	1351.61	2719.17	4695.16	3920.49	2741.14	2623.48	1908.96	1910.63	1913.68	1730.46
M709T732			0.446382	1.39619	0.189814	708.884	732.416	1076.96	2317.45	4613.46	1721.99	4949.98	5106.29	5955.31	5423.04	3905.11	5481.2	2153.71	4706.76	7184.41	6499.24	6505.46
M876T60			0.293414	1.39605	0.114978	875.505	60.097	2084.76	469.526	1089.69	1556.48	2086.98	2262.37	2023.79	1511.47	1983.93	2301.24	2324.52	3187.07	1727.52	1460.48	1469.47
M307T292			0.289125	1.3959	0.206202	307.033	292.428	1049.87	1181.6	2016.13	1297.11	1945.05	1272.71	1690.74	3199.78	2209.61	3079.57	1061.82	990.051	1265.36	1243.59	1170.86
M421T62			0.750109	1.39586	0.559969	421.148	61.895	3974.1	4728.97	43893.9	8791.65	3470.64	10797.9	6079.16	40847.1	8365.95	10419.2	22976.4	16919.1	8788.64	8999.08	9086.1
M809T79_7			0.370891	1.39584	0.226971	809.44	78.5115	1273.07	6777.75	3152.18	6701.91	2888.05	1538.24	5687.27	6559.32	4192.03	6331.85	5405.48	2994.81	5180.02	5372.08	5180.51
M385T62			0.75085	1.39576	0.789259	385.309	61.808	276.634	27945	9013.33	279.365	697.255	9013.25	283.119	723.337	240.386	63342.7	585.692	739.407	695.215	2988.38	792.64
M327T186			1.7734	1.3956	0.38183	327.217	185.877	81115.7	53986.8	37749.4	29760.1	32008.9	6776.16	15007.6	46333	37128.9	66661.5	55151.3	116611	27402.8	27297.4	23519.1
M811T337			0.693482	1.39543	0.297792	810.527	337.139	9404.84	4369.59	5409.73	5520.26	5961.51	8493.35	4741.8	8720.6	6240.12	6622.71	8609.65	19709.1	10668.1	10688	7976.9
M624T398			1.31144	1.39538	0.0258268	623.502	397.656	25962.9	22403.9	19168.3	26153.3	21764.3	29618.9	30113.1	33262.9	34062.7	32892.9	23692.6	48405.1	27305.1	13685.1	26874.6
M720T82			0.564431	1.3953	0.278212	720.495	81.8685	11501	951.347	3382.06	3981.14	3159.33	4638.72	3950.68	7020.39	6006.33	6265.65	6939.1	8347.14	5226.61	4932.82	5228.11
M1116T786			0.154205	1.39508	0.32116	1116.3	785.581	597.822	460.76	872.871	2074.45	698.46	1833.97	890.935	2644.74	1278.73	1578.74	2061.24	667.145	1292.37	1281.36	1289.71
M531T871			0.407469	1.39502	0.0375532	531.25	870.515	4143.3	1286.11	2907.85	2193.55	3351.83	4522.95	4235.18	4473.35	4042.17	4637.9	4357.21	3930.33	5635.67	5060.28	5147.14
M219T78			0.405956	1.39453	0.0403485	219.138	77.8525	1912.52	2131.41	2284.07	1042.89	2189.53	1556.1	2333.42	2685.62	3698.89	2564.77	2136.11	2083.5	2221.9	2320.1	2222.08
M308T432			0.266519	1.39437	0.12418	308.044	432.004	803.975	1446.74	608.824	569.895	579.479	722.501	684.875	1130.91	820.639	1102.35	1424.58	1434	761.24	761.231	788.89
M134T367			0.217904	1.394	0.230189	134.469	367.201	363.677	87.5345	891.814	1132.77	743.253	800.149	719.035	483.225	906.42	1478.73	966.529	1048.83	1642.03	1638.68	1517.13
M575T620_2			0.239452	1.39346	0.105919	574.851	619.556	477.682	3148.63	2789.58	2700.8	2642.2	2104.53	2675.48	3463.08	3918.46	2478.73	4340.76	2441.6	977.179	956.904	1167.85
M1009T660			1.47253	1.39335	0.0724111	1008.97	659.647	43968.7	29549.5	23734.2	18236	29157.3	44575.2	36369.2	51800.5	50183.9	56233.1	41114.9	27948.3	47993.3	49620.1	57598.1
M849T304			0.756875	1.3933	0.095001	848.613	304.381	12195.9	11273.6	6335.41	10868.5	8012.94	13714.1	13315.4	18454.9	19760.4	11629.1	7219.21	16563.2	12490.4	12490.6	12589.1
M313T201			0.420561	1.39309	0.449888	313.237	200.527	7431.28	9930.69	9238.3	5488.75	6601.67	27906.9	6634.2	10117.7	15691.8	4531.66	32120.8	23680	14359.6	12708.5	12714.5
M605T74			0.48051	1.39258	0.0843828	605.452	73.642	2269.59	3529.49	3375.46	463.368	2368.12	3940.9	3129.06	3556.05	3306.09	4046.11	4150.07	4019.92	4184.68	3685.82	4187.1
M809T276			10.9473	1.39232	0.149355	808.583	276.476	787049	1.52184e+06	2.3746e+06	3.07551e+06	3.16826e+06	3.79538e+06	3.11517e+06	5.35882e+06	3.42709e+06	3.1358e+06	2.44553e+06	3.01619e+06	2.22924e+06	2.14924e+06	2.2294e+06
M685T78			0.41277	1.3921	0.290446	685.44	78.3285	661.21	2301.14	3041.89	1569	1837.19	6155.83	1643.12	4373.12	3694.57	5051.83	3461.02	3446.18	2023.02	1860.16	1866.4
M62T1269			1.25847	1.39196	0.214267	61.9883	1268.83	21637.8	37129	34064.4	19368.5	28335.2	13335.8	32930.1	39459.1	24530.1	34933.3	64612.7	17716.9	33878.3	49381	37321
M241T726			0.22607	1.39151	0.0953128	241.031	726.372	985.653	400.249	430.645	637.775	1132.76	868.753	1085.48	1091.14	1380.99	626.471	984.43	1031.82	979.862	1004.96	979.865
M891T544			0.244512	1.3915	0.172902	890.935	544.203	91.1372	809.633	640.884	571.572	1594.96	1254.44	1153.33	1180.14	1148.52	1012.76	1105.21	1305.51	1089.18	1201.43	1090.71
M384T69			0.172123	1.39136	0.0416855	384.119	68.981	623.591	744.178	665.379	925.779	956.987	606.876	887.723	804.082	1564.55	960.058	1010.1	1066.33	1041.28	1068.7	1041.14
M1185T730			0.32939	1.39136	0.0810496	1184.87	730.389	1543.78	1255.45	1308.03	2571.24	2211.91	2059.57	2755.46	2553.35	2322.97	3805.76	1659.15	2138.62	3025.54	3025.06	3130.28
M308T67			0.211895	1.39133	0.409303	308.152	67.314	2509.7	4361.32	545.354	1909.36	9012.22	1343.87	5318.14	2515.05	5818.73	1681.31	5970.86	6079.84	1506.94	2243.01	2584.45
M262T671			0.210821	1.39091	0.105135	262.082	671.284	647.01	855.687	790.194	512.272	903.905	750.504	747.035	896.49	1009.91	899.426	874.925	1775.1	535.509	535.453	541.558
M287T686			0.29957	1.39091	0.580805	287.013	686.009	1962.8	3101.15	643.543	1051.8	416.565	5853.07	1111.2	962.081	2096.94	343.438	6209.27	7399.15	5985.34	6927.21	6924.48
M299T644			0.235354	1.39083	0.250047	298.813	643.898	451.374	2186	2968.29	1252.16	2265.35	2739.62	3573.91	3598.74	2173.86	590.002	2777.52	3785.11	2057.67	2558.36	2541.05
M542T370			0.944348	1.39038	0.272223	542.323	370.317	26427	26498.6	12647.2	3012.32	23646.6	15210.8	29491.7	38586.3	29201.5	21263.2	26142.9	4700.85	19392	22960.4	22976.6
M767T730			0.611272	1.39032	0.210335	766.926	730.39	4607.95	4797.19	10188.9	6014.57	4556.93	5033.34	4986.33	9945.88	8783.61	10604.8	2679.07	11938.1	7881	8773.73	8729.43
M332T546			0.338803	1.3899	0.110253	332.077	546.3	1699.24	1160.28	1910.89	1733.51	1537.12	1415.4	2834.62	2461.57	1912.84	832.879	1972.61	3128.96	1711.24	1704.39	2034.57
M246T674			0.312026	1.38975	0.150572	246.109	673.753	1419.17	1083.52	2828	833.294	1639.4	3271.67	2330.21	3525.09	2471.34	2865.23	1914	2285.66	2197.85	2572.38	2351.81
M713T776			0.442287	1.38967	0.329996	713.473	775.623	1824.87	3858.95	2438.64	4726.8	2448.59	5400.65	4969.79	5210.38	2858.22	10135	2098.57	3492.19	2919.11	3015.99	3069.83
M437T829			0.840498	1.38957	0.0418369	436.826	828.609	7629.05	8963.59	9808.89	6336.33	12622.8	8420.09	12739	16245.8	14983.9	12664.4	9194.96	8904.15	10419.9	10423.5	10754.6
M329T55			0.249086	1.38932	0.512322	329.267	55.4105	6304.14	1827	1014.55	1443.37	1283.07	1130.81	1229.63	1414.17	1298.27	2643.75	4831.8	6647.59	1331.56	1605.89	1516.86
M563T725			1.46033	1.38909	0.15316	562.929	725.105	81451.6	22018.6	13021.1	101560	52682.7	86441.3	82368.8	90772.3	85658.2	76876.2	83851.9	76621.9	79082.3	77468.9	88083.4
M311T179			1.3197	1.38886	0.342922	311.221	178.886	15846.1	15923	27747	9163.67	35525.6	40650	22868.2	24109.7	29503.1	19663.5	33032.3	72006.8	24254.6	24207.1	19464.2
M368T78_2			0.379421	1.38882	0.0787971	368.313	77.744	1407.73	1418.45	1318.69	2202.71	2117.77	1084.33	2442.74	1875.52	1780.42	2135.88	1673.8	3354.46	1271.71	1343.52	1393.4
M333T735			0.247107	1.38861	0.548055	333.139	734.883	697.639	2527.38	874.392	1895.78	7832.97	1430.66	8416.21	674.751	4484.4	3827.32	1000.02	2785.82	6170.34	6171.73	6450.97
M373T636			2.55076	1.38857	0.0359242	373.009	636.137	85381.5	83902.5	96047.8	51799.4	33222.5	72023.2	91674.2	107600	71349.9	100976	106724	108177	139046	110554	109075
M612T870			0.298931	1.38842	0.0980616	612.176	869.702	960.485	1758.32	2013.57	2567.71	1516.66	2086.82	1635.66	2304.16	2528.23	3925.01	2639.6	2106.11	2733.59	2841.99	2727.47
M195T625			0.511714	1.38821	0.188703	194.903	624.897	10161.4	2948.43	3185.43	7893.11	11116.2	4379.77	10859.9	9589.4	11545.6	7322.14	4776.72	10996.5	7554.46	8402.45	8410.7
M519T317			0.629124	1.38792	0.074468	519.113	317.394	7315.7	7219.73	16228.2	7357.07	12265.7	15607.2	13365.8	15532.5	18946.9	10278.1	16817.3	16653	9890.33	9890.25	9713.39
M524T380			0.455334	1.38765	0.192073	524.275	379.81	4965.58	8888.03	7593.34	5009.95	11853.1	7920.4	12308.6	15069.8	5968.92	7071.83	16523.4	7209.19	6281.12	5466.77	8360.16
M214T365			0.523882	1.38741	0.553485	214.108	365.259	6064.54	1555.76	1099.18	11777.8	4683.98	784.38	11051.5	631.223	2509.42	10214.3	10841.6	776.945	11433.8	11433.9	11421.7
M702T1131			0.329344	1.3873	0.393294	702.496	1130.51	4957.79	3301.51	4893.62	5128	4858.39	3257.95	4743.93	15315	5043.26	2801.78	3717.44	4999.46	3281.73	3305.48	3585.53
M1075T532			0.296709	1.38723	0.0644268	1075.02	532.471	1097.76	1085.01	1346.99	1289.22	1210.77	1873.17	1301.49	1954.88	1711.29	1495.11	2802.07	1698.32	1421.68	1501.1	1508.15
M493T561			0.347677	1.38653	0.474683	492.928	560.568	1258.13	1816.73	1743.62	551.845	1605.08	6512.96	5319.94	615.47	3366.38	3658.59	1059.05	4682.57	4135.55	3486.89	3494.33
M674T354			2.07053	1.38596	0.347575	673.526	353.92	116058	83550	76076.5	71350.3	82869.7	60612.8	136958	243395	76176.9	135131	49488.8	38686.3	178998	178881	143052
M325T56			0.460024	1.38581	0.295493	325.292	56.422	1217.84	3995.06	3320.15	5601.96	4537.27	3889.31	6073.4	4238.54	2849.35	10635.1	3589.31	3880.31	3485.62	3459.16	2149.44
M160T424_2			0.521239	1.38579	0.432654	160.132	423.587	2821.37	4521.93	7085.4	11211.5	7676.78	4216.45	18609.4	2418.4	5393.7	9233.39	2444.78	13913.7	5323.31	5423.22	5423.05
M742T614			0.481655	1.38505	0.162818	742.497	614.216	3885.68	1230.31	4718.94	2348.08	3553.92	4147.03	6994.56	5182.17	3463.66	4236.79	2328.85	5334.29	4059.06	3704.33	3793.77
M186T316			0.32352	1.38486	0.338468	186.221	315.813	1353.78	2595.7	4250.53	4555.72	4179.88	5569.17	11174.3	4196.71	5421.06	5178.17	2822.23	2373.51	2943	3088.54	3088.41
M717T578			1.41887	1.3848	0.223666	717.466	577.991	3075.88	36320.4	49950.6	30718.9	23907.5	55919.7	32824.6	37530.2	58423.3	55572.2	28454.1	64008.1	14912.8	16084.5	14897.2
M335T389			0.22344	1.38465	0.220424	335.058	389.306	1033.28	624.222	1376.29	587.827	681.02	349.629	788.844	933.292	1823.47	1318.19	764.802	813.184	1794.79	1434.98	1332.43
M535T74			0.551086	1.38458	0.0909425	535.47	74.0025	5455.06	2968.78	5703.5	1779.27	2403.73	3886.26	3455.42	6136.05	5098.02	5096.54	5840.99	5106	4671.25	4409.59	4670.98
M345T70			0.395971	1.38452	0.69828	345.154	69.622	1004.71	2836.97	110712	9684.45	5401	1453.91	68359.1	1157.54	7008.79	24621.7	58965.9	21388.6	1178.27	1222.48	1178.22
M601T378			0.269946	1.3844	0.253705	601.32	377.527	2878.65	1901.44	1506.41	3489.62	1772.46	879.833	2889.95	4057.97	4077.37	3608.64	1203.11	1368.79	2657.43	2665.58	2247.67
M309T79			1.00002	1.38423	0.242662	309.206	79.2505	12211.6	15187	13406.9	4699.56	8742.25	13997.5	8617.74	12841.3	11707	20935.7	11464.4	28900.2	13496.3	14358.9	14398.9
M377T701			0.259202	1.38413	0.16598	376.905	700.569	871.844	774.964	1402.82	1244.04	1558.13	1180.22	2397.36	1253.53	846.655	2331.85	1880.85	1022.95	1690.88	1673.24	1782.86
M341T751			0.412362	1.38382	0.402737	340.881	750.725	1063.78	1843.05	7165.73	2791.66	2642.89	7216.29	9074.44	1810.86	2337.36	4988.89	4665.56	8567.88	2971.47	3061.83	3063.28
M191T382			0.433788	1.38375	0.54251	191.047	381.863	468.096	4939.04	5174.54	94.2585	4661.61	1469.56	531.575	5017.35	1396.53	9349.93	1235.09	5726.43	271.494		408.123
M731T953			0.492726	1.38371	0.0468305	731.114	953.122	3714.12	2368.62	2925.69	1877.67	3104.89	3141.92	2563.79	3405.58	3371.03	5209.64	4585.5	4571.4	3887.99	3676.68	3681.17
M257T853			0.0793806	1.38357	0.268853	257.023	852.835	604.672	422.91	501.52	489.033	701.544	587.132	429.733	405.049	1531.24	516.211	956.929	736.037	375.606	371.489	401.905
M910T733			0.235147	1.3828	0.207358	910.114	732.562	678.972	1024.25	684.804	544.658	850.604	783.029	592.47	728.414	1224.69	715.546	1105.61	1947.59	583.066	553.178	552.272
M587T808			0.413317	1.38254	0.0421563	587.021	808.43	1461.41	2257.37	2717.41	1834.96	2094.69	3225.66	2835.77	3524.64	2227.54	3176.42	4151.54	2874.9	4446.33	3703.62	3742
M402T667			0.250533	1.3825	0.153714	402.097	667.14	1922.97	775.922	2147.78	3067.14	2358.01	2522.87	4048.09	1646.09	2457.98	3659.06	3878	1999.49	4277.47	4280.08	4480.94
M158T1302			0.260037	1.38235	0.209888	158.153	1302.29	1388.26	1166.26	1463.22	1327.14	1699.51	1240	1694.81	1366.93	2203.46	3691.25	1219.98	1275.45	1637.01	1580.03	1585.96
M349T585			0.27067	1.38232	0.19371	348.929	585.213	1160.43	2398.35	3515.13	2001.05	3497.07	3309.53	5323.18	2514.66	2132.62	3548.91	5662.21	2771.82	4050.99	4200.59	4201.67
M1053T640			0.825869	1.38198	0.270593	1053	639.716	5301.17	6127.74	9475.56	18957.8	3206.45	8177.63	7515.87	11017.2	8782.15	16441.6	10005.8	17058.6	16175.5	12809.5	13075.2
M614T312			0.218677	1.38184	0.279755	614.394	312.291	220.528	70.6501	1598	868.328	1612.57	737.181	1243.28	1045.39	1006.12	959.358	1588.62	1214.66	420.24	615.791	622.017
M719T621			0.211825	1.38151	0.0757306	718.743	621.463	413.749	1124.1	1873.52	1138.72	1628.84	1037.02	1506.22	1733.12	1572.63	1796.26	2041.79	1318.84	1131.2	1132.12	1177.57
M364T70			0.105986	1.38132	0.698219	364.181	70.014	459.197	418.423	2020.48	1195.01	1428.91	425.653	402.995	5903.97	462.982	449.986	439.873	555.836	1119.99	1010.98	1725.2
M139T520			0.376391	1.38106	0.333981	139.025	519.675	4445.83	2032.74	5469.55	790.357	2828.66	2530.33	5531.6	635.035	3345.86	4486.16	7163.36	3831.6	3309.07	3255.04	3483.04
M814T45			0.353988	1.38103	0.107356	813.585	45.3115	1558.34	2862.04	1521.75	1473.76	722.813	1927.88	2880.88	2414.54	1777.34	2745.29	1538.07	2546.16	1975.7	1935.21	1976.34
M226T986			0.658175	1.38092	0.162896	226.083	986.341	13678.5	10525	20151.5	10100.3	30999.4	21564.3	33456.4	24226.1	24458	21031.2	31934	12679.3	20879.9	20894.3	21211.2
M221T45			0.172577	1.38051	0.215791	220.943	44.7405	443.126	736.254	296.662	154.847	454.166	481.501	829.172	251.238	464.777	830.674	486.561	680.732	258.95	370.78	431.758
M432T146			0.61187	1.38043	0.513113	432.279	145.575	35610.9	20031.6	29521.5	98246.9	58048.7	36600.1	18998.6	97044.6	162619	14068.2	34395.3	56716.9	9479.28	14960.3	14969.1
M318T499			0.259863	1.38021	0.18558	318.029	498.721	844.916	524.301	581.736	1032.67	980.738	967.016	1000.08	1307.98	894.407	1203.5	460.942	1939.43	1001.98	1001.27	963.807
M547T369			0.777022	1.3802	0.182993	547.356	369.065	15284.7	12006.6	12528.8	3985.84	14163.5	13026.7	27135.4	20757.3	16117	12687.7	11499	9792.74	16838.9	15544.6	15578.2
M509T75			0.458311	1.38014	0.134424	509.454	74.531	2954.01	2472.39	4587.95	2052.26	2496.45	3600.96	2085.13	5266.96	4730.81	6095.17	3596.75	3294.02	3854.83	3644.91	3839.4
M845T665			0.806107	1.37991	0.384767	844.963	665.274	13974	12387.5	44258.8	22229.1	11379.6	15467.6	16198	43757.8	42190.4	18863.6	38845.6	5315.62	20050.6	17902.5	18812.4
M196T829			0.388399	1.3799	0.132917	195.95	828.547	1544.88	3008.63	2320.87	600.968	2722.9	2567.88	2839.8	3123.29	4461.21	2223.98	2428.25	2539.4	1156.59	1157.55	1268.95
M710T732			0.411983	1.37981	0.161166	709.894	731.655	1438.76	1603.54	3776.22	4920.47	2342.83	2917.03	2811.05	4239.31	2671.19	5460.78	3480.05	4792.82	5659.11	5660.94	4909.07
M97T829			0.55509	1.37977	0.176922	96.6655	828.585	5406.89	5156.65	3292.13	1714.18	7600.41	4467.01	7238.52	9016.99	7821.96	6161.17	2992.61	4901.74	3286.16	3160.11	3429.55
M381T34			0.316216	1.37951	0.199492	381.112	34.496	2661.55	791.608	2659.34	707.555	473.97	2094.63	2161.51	2153.76	1772.28	2227.62	2631.18	2005.38	1903.49	2059.76	2052.96
M352T392			0.752012	1.37902	0.40836	352.049	391.865	4050.53	5032.73	5266.3	16811.2	29404.1	3862.51	24254.2	13116.6	10031.4	15116.6	15035.7	11292.1	26022.4	25962.8	29296.8
M366T929			0.286527	1.37852	0.22984	366.052	928.517	855.581	4556.94	5253.93	3914.41	4418.32	1798.23	5729.28	4940.79	6805.29	1904.05	3389.83	5900.32	4126.8	4157.5	4354.16
M703T248			0.214689	1.37835	0.251854	703.466	247.798	835.332	861.613	1166.07	828.218	727.182	811.656	807.079	2352.67	1199.02	432.168	1306.32	1111.6	1312.13	1455.38	1313.05
M787T343			0.377541	1.37817	0.308043	786.527	342.825	3934.87	838.72	1533.57	2290.51	1824.43	1464.32	858.127	2784.8	1655.12	3668.94	2860.74	4553.75	2891.2	2894.92	2753.58
M510T518			0.211721	1.37806	0.0510041	510.309	518.345	142.234	641.977	423.526	652.332	573.32	500.162	581.701	678.112	655.701	748.8	612.058	766.247		11.0345	11.3895
M812T351			0.683624	1.37798	0.201594	811.666	351.084	32617.8	13195.5	20383.4	13267.5	21656.3	27180.9	17437.4	22673.1	26690.1	23397.4	51575.7	35022.6	22341.8	22589.1	22590.1
M370T351			0.533093	1.37786	0.18144	370.294	351.034	7669.42	7276.55	7713.56	8789.51	13097.1	8129.66	14198.3	20911.1	13562.4	7212.82	8112.12	8583.22	4593.36	7029.21	7011.69
M886T728			0.270603	1.37784	0.107925	885.879	728.195	1217.09	395.475	1545.9	1202.6	1458.31	1156.34	1666.46	1389.32	1198.64	2308.99	1133.11	1914.88	2684.57	2683.14	2725.66
M254T210			0.162235	1.37781	0.315046	254.211	209.63	1885.32	1820.69	847.711	1663.82	1434.01	1159.84	1340.56	1356.04	1324.71	2631.95	4264.94	1222.23	1513.63	1514.89	1398.74
M769T723			0.244809	1.37738	0.0630001	768.94	723.424	1138.25	976.632	626.118	1316.66	1147.88	1182.38	2009.81	1463.44	917.212	1842.44	1360.14	1205.59	2169	2172.91	2499.41
M792T659			0.933849	1.37728	0.0646429	791.981	659.265	9081.69	7912.25	12823.4	14898.9	7944.22	11873.2	17354.7	10386.2	13160.9	12419.3	14537.2	21022.6	9943.31	9498.9	9923.19
M81T88			3.78253	1.37722	0.000413497	80.9161	88.0085	149385	115881	174236	143006	152615	137600	193522	210768	193550	222842	172834	208419	151984	152086	156834
M418T775			0.228785	1.377	0.333132	418.04	774.656	957.486	1988.53	488.31	568.188	669.703	1001.39	840.387	1153.62	2591.82	1287.38	815.087	1124.26	603.805	604.004	637.719
M727T678			0.952348	1.37683	0.0657104	726.935	678.16	4263.47	11585.4	18580	20389.9	21791	20989.6	20054.1	23647.1	24233.6	23881.1	19310.6	23251.1	34984.4	34668.3	38557.5
M289T798			0.511802	1.37676	0.0667865	288.949	798.39	4604.55	3215.51	3627.02	2394.27	3630.88	3784.81	6455.19	3881.99	3670.86	6889.14	4369.39	3999.22	4141.67	4035.87	4831.09
M205T619			0.215348	1.37668	0.0210229	204.912	619.138	500.609	476.436	657.652	562.138	753.695	628.963	1060.02	912.349	644.419	712.125	938.797	660.096	755.468	778.993	778.05
M291T79			0.891904	1.37652	0.021389	291.196	78.568	7746.97	8688.1	10255	6258.76	7923.63	12304.6	10322.8	10635	11011.9	13766.4	11763.5	15700	8401.82	8292.77	8293.3
M370T76			0.416279	1.37639	0.249424	370.13	75.6135	1729.57	2670.91	3530.02	2632.57	1628.24	1413.37	2682.02	3342.74	1891.17	2041.33	2774	5994.06	3050.95	2521.72	3057.45
M618T830			0.290129	1.37586	0.0166088	617.787	829.745	956.309	1189.32	1019.6	880.241	442.909	1218.6	1217.16	1417.94	1176.1	1460.35	1231.27	1349.2	987.469	1038.35	1043.45
M192T77			0.269633	1.37573	0.147559	192.159	77.034	1997.04	472.077	4082.12	3374.36	3708.99	2953.3	3571.32	4006.04	3971.96	4463.36	4703.78	2103.95	2491.54	2489.15	2356.51
M703T688			3.09829	1.37554	0.100773	702.974	687.601	175888	256868	307764	146495	286003	366456	498107	232267	305334	346984	447090	287821	342997	377400	342659
M715T320			0.487385	1.37549	0.356221	715.464	319.679	2321.41	7698.38	13599.2	6409.53	9315.32	17629.5	22163.1	16425.4	18846.2	6855.36	3745.3	10331.1	4975.07	5423.88	4913.57
M530T53			0.382933	1.37512	0.0604541	530.344	53.283	1638.72	2362.91	2366.43	2108	2242.39	2823.8	3553.4	1992.05	2160.17	3759.62	2928.23	4228.69	1671.25	1841.49	1885.39
M853T347			0.251195	1.37466	0.0951016	853.486	347.409	636.104	286.478	1078.3	1122.24	879.212	840.452	774.066	892.189	1182.1	1473.27	1058.43	1277.13	1168.9	1160.91	1096.86
M607T38			0.152496	1.37462	0.52715	607.301	38.2825	589.62	119.735	1101.92	231.529	238.795	1779.35	243.587	680.584	595.42	1910.61	1684.05	468.021	1789.17	1446.2	1423.16
M397T638			0.24883	1.37433	0.0244632	396.79	637.532	907.103	1503.86	1575.65	1159.69	1998.07	1669.37	2449.01	1736.6	2339.78	1625.82	2095.16	1866.64	2144.71	2007.36	2139.89
M466T876			0.169902	1.37431	0.139168	466.232	876.43	1407.11	1086.26	937.548	1570.2	1444.09	1494.55	1948.65	1160.14	3133.23	1243.88	1747.28	1678.5	1230.78	1210.51	1271.39
M144T340			0.192438	1.37403	0.474589	143.976	340.478	584.996	1902.76	1351.56	770.017	1218.33	636.408	3741.47	901.326	1816.09	605.956	390.094	1426.87	647.586	499.612	780.203
M708T768			0.180379	1.37388	0.0492025	707.736	767.878	733.975	290.411	698.256	639.268	451.519	523.154	895.193	766.511	655.372	755.069	545.717	966.218	732.843	864.333	714.273
M1189T701			0.10703	1.37369	0.433864	1188.99	700.537	1774.78	1561.12	527.309	617.584	750.107	1824.31	1631.48	761.771	3737.34	798.083	2038.5	724.526	937.709	938.539	827.543
M196T661			0.201614	1.3736	0.06352	196.096	660.513	604.519	915.42	790.125	1449.5	1739.65	811.915	1397.59	1403.58	1474.3	1236.59	1625.79	1531.1	1622.47	1564.2	1565.09
M631T581			0.298011	1.37349	0.039378	630.775	581.093	1132.51	598.76	1377.85	953.483	1591.93	1262.66	2031.17	1810.66	1477.53	1329.35	1350.48	1501.5	1142.84	1168.06	1289.67
M1197T683			0.653179	1.37348	0.136507	1197	683.303	4966.34	10121	10337	15955.3	10683.7	12113.5	10641.4	23895.9	14980.8	10760.1	12967.2	14900.3	13441.1	13334.8	13441.3
M739T302			1.18676	1.37333	0.227629	738.534	302.21	5381.37	6221.72	28524	32914.7	18484.9	31292.5	14445.2	37690	27859.3	28646.6	28828.8	31201.4	27824.4	27852.6	25332.9
M406T597			0.2344	1.37321	0.127964	406.015	596.934	245.068	1101.37	1599.06	840.352	953.392	1149.8	1358.99	1706.05	908.361	1232.52	1193.28	1687.7	1113.41	1207.44	1202.25
M253T276			1.08532	1.3732	0.133484	253.019	275.529	2351.77	11335.1	21174.2	21765	27599.9	24132.4	28369.5	22964.3	24740.4	28656.1	25303	18764.6	30544.5	33636.9	33598.1
M788T82			0.465471	1.37317	0.168675	787.509	81.654	1676.32	3836.01	3974.59	2644.04	1122.24	3092.91	1847.64	3252.94	4037.1	4495.94	3378.78	5433.59	4519.4	3783.1	3864.62
M670T71_1			0.470651	1.37299	0.0685809	670.406	70.971	4201.36	3399.09	3669.04	3326.54	4077.98	3146.86	3012.04	4850	3969.49	5535.85	4942.3	7650.16	2655.96	2872.73	2877.09
M361T499			0.290338	1.37298	0.121604	361.063	498.627	1202.12	1152.29	1592.67	593.703	2112.91	1268.16	2239.61	1507.88	2631.48	1393.67	1622.86	1481.04	1134.88	1231.52	1226.78
M221T612			0.242565	1.37296	0.348818	220.886	612.177	665.363	1008.53	1349.83	1413.15	1474.16	2324.57	4077.61	767.707	1298.45	1818.95	1458.85	1885.61	1744.75	1746.38	1900.8
M797T718			0.788613	1.37287	0.150505	796.959	718.096	5301.67	11812.8	9564.68	21966.3	17873.4	20780	20478.3	18317.4	12561.8	16682.6	26982.6	24827.3	19230	16522.8	18800.8
M824T47			0.263188	1.37274	0.146618	823.676	47.361	865.217	1738.42	916.883	922.783	1710.6	1651.11	977.111	2182.23	1019.88	2069.78	2295.13	2170.11	1099.36	1099.52	1066.66
M855T295			1.59583	1.37271	0.0628274	854.565	295.255	62202.8	59543.1	44854.7	26685.5	57642.1	51930.5	89533	60265.8	89290.6	49585	53344	73719.4	31556.5	31534.7	30351.8
M253T49			0.280798	1.37264	0.695728	253.047	48.949	4621.12	3202.03	2768.32	6132	2672.55	2810.83	2552.73	1971.69	21932	840.783	1723.09	1461.7	1423.3	1090.59	1420.67
M398T830			0.987335	1.37255	0.136772	398.025	829.699	19369.8	14710	7806.64	4304.43	11419.6	13881.2	14103.5	14506	18510.7	21058.6	10257.3	19689.6	10964.4	11051.3	11051.3
M259T64			0.309036	1.37253	0.307385	259.002	63.6335	1169.15	1268.3	1237.86	2901.56	1492.84	843.655	3565.82	2192.37	1101.7	853.1	2798.42	1722.45	980.201	1540.68	1084.26
M247T76			0.703547	1.37235	0.0909946	247.169	75.536	6469.33	2364.53	7744.74	5101.38	9476.95	12385.1	10169.4	9597.72	10961.9	9792.71	9104.65	10128.3	7467.62	7978.87	7942.2
M621T684			3.24759	1.37223	0.0330145	620.971	683.515	182182	270998	234436	243271	69986.4	204286	258371	258390	269162	266992	291004	309834	343224	377880	348742
M384T729			0.173845	1.37175	0.136067	384.002	729.475	564.563	486.904	514.947	593.623	520.189	708.58	1153.58	1127.29	585.449	781.831	591.858	408.572	689.768	716.233	664.023
M296T793			2.30144	1.37169	0.181356	296.066	792.911	122269	155062	62949	92053.4	98858.5	124584	264243	127384	95262.4	106885	137022	168728	117646	153797	115060
M380T498			0.274774	1.37169	0.0822021	380.089	497.813	1333.87	1031.07	562.726	915.054	1258.26	1248.82	1196.42	899.375	2076.53	1333.78	1550.72	1653.15	1055.59	1055.58	985.606
M226T750			0.562288	1.37155	0.188301	226.048	750.485	3656.2	5238.31	10899.1	4451.58	9839.41	9570.09	13944.4	10423.3	10990	11174.2	9795.06	3547.66	10712.2	10715.2	10992.6
M774T82			0.578175	1.37122	0.173021	773.583	81.873	9732.36	6473.11	4432.25	3703.55	3468.83	6088.92	8590.94	3663.48	6310.14	11041.9	7328.4	9548.27	6283.98	6280.22	6437.33
M616T79			0.433367	1.37102	0.12214	616.354	79.113	3013.06	2453.58	2051.68	2445.43	1655.25	1726.29	2828.67	2510.04	1982.39	3145.02	2721.32	5109.27	2637.33	2739.99	2745.2
M498T861			0.240756	1.37082	0.470204	498.18	861.056	791.874	2765.76	546.297	442.228	761.11	817.698	1175.77	2660.84	815.739	964.504	469.436	2309.94	573.761	743.962	742.614
M274T69			0.520476	1.37039	0.369539	274.074	69.2885	3407.84	9381.95	2722.11	2024.45	4103.72	1858.4	4800.91	1687.39	3503.55	8424.88	6279.85	7505.52	3931.4	3974.92	3267.12
M313T852_1			0.322861	1.37031	0.0718396	312.918	851.853	1474.45	578.685	1979.57	979.828	1967.93	1339.22	2363.28	1661.13	1538.03	1832.07	2058.22	1947.79	2609.36	2937.42	2931.27
M1037T617			0.316679	1.37025	0.0524995	1036.62	617.066	724.018	1715.51	2306.64	2286.36	2608.25	1554.7	1981.25	2705.63	2709.27	2641.36	2325.32	2977.78	1285.34	1298.11	1380.41
M789T252			0.76236	1.3702	0.191834	788.522	251.819	12723	6134.47	6809.84	8389.34	4236.33	7913.03	5538.96	9531.04	6908.89	12678.1	11983.9	16670.5	10187.5	10185.7	10438.5
M607T307			0.288741	1.37006	0.302492	606.55	307.006	2786.06	2756.12	1092.67	728.199	1708.25	1140.19	4194.59	803.847	1894.47	2261.11	2674.7	2161.65	2702.24	2675.77	2675.66
M697T302			0.327447	1.36989	0.184568	697.497	301.996	2699.42	2342.42	2799.66	4005.63	2580.47	1460.91	2359.14	6352.52	3144.98	2949.82	2763.63	4195.44	2889.26	3329.58	2944.97
M128T478			0.40005	1.36984	0.328095	128.035	477.789	3209.71	3868.91	877.531	1183.65	684.992	3161	2309.62	2782.88	2030.85	3653.2	1775.32	5236.55	1159.81	1386.17	1143.77
M744T680			0.566326	1.36977	0.151002	744.476	680.491	1407.15	11694.2	9080.95	6727.76	8088.26	5169.34	11080.8	10617.2	8558.29	11942.3	9381.85	6179.82	10455.5	10561.5	10559.4
M713T448			0.492641	1.3695	0.256012	713.472	447.976	3522.13	3165.97	4060.85	3980.09	6994.88	2915.61	4841.96	4225.68	4602.65	11118.2	4198.85	4756.51	7869.78	7544.73	7870.44
M642T49_2			0.437813	1.36933	0.203276	642.436	49.3765	4960.93	3920.8	7428.66	3484.13	3011.95	3683.44	4395.46	10719.5	4017.26	5049.27	5617.32	6474.63	2502.91	2505	1532.91
M672T351			0.359381	1.36932	0.326521	671.51	350.771	3295.7	3537.81	12860.6	8455.29	7889.76	2473.12	14599.6	12182.1	6408.49	6790.49	8656.79	4098.18	5938.58	5987.83	7023.7
M612T73			0.3882	1.36914	0.215324	612.362	72.997	2597.26	1345.4	2569.53	2058.46	2343.49	739.339	1698.85	3159.01	2415.27	2231.81	1818.62	4631.72	2213.64	2238.3	2238.28
M427T732			0.484256	1.3691	0.1372	427.082	732.464	2373.06	2317.64	5493.53	4779.63	5923.28	6466.35	6468.04	7578.02	5136.51	9040.78	4849.51	4376.72	6919.71	6692.97	6912.05
M744T258			0.579485	1.36904	0.18156	743.541	257.508	7692.47	4866.8	2565.2	3888.08	3154.43	3928.6	3295.07	4660.91	5100.91	6836.74	6673.23	9159.07	4829.79	4840.63	4827.25
M644T56			0.354928	1.36902	0.112437	643.579	55.89	1741.84	3648.19	1341.19	2137.09	2810.3	1494.72	2465.78	2105.83	2922.84	4044.9	2874.15	3621.05	2469.75	2474.23	2179.26
M442T898			0.275632	1.36895	0.10573	441.983	898.399	810.987	1198.68	1704.52	910.152	1194.17	1069.47	1073.9	1630.72	2452.29	1220.88	1694.94	1356.57	1122.58	1149.46	1228.37
M522T803			0.335787	1.36891	0.308085	522.122	802.622	1888.68	3375.34	3169.66	369.006	2606.21	1895.26	4078.48	2584.77	5563.23	2382.77	2138.19	1464.81	1165.04	1332.54	1320.44
M719T251			0.350183	1.36879	0.280399	719.469	251.054	3312.92	593.964	3467.19	1548.69	830.975	1386.17	2026.5	2135.84	1475.44	3581.89	2895.56	3133.02	2821.27	2906.48	2820.9
M265T80			0.386541	1.36857	0.324817	265.18	79.595	858.734	2459.31	5495.85	1110.45	2641.61	5442.95	5251.34	986.411	5490.91	4559.33	3800.84	4557.54	3446.23	3682.64	3451.73
M240T1044			0.449872	1.36856	0.119429	240.11	1044.13	3896.3	3531.69	8612.37	5132.66	5961.05	8028.13	11235.5	9059.34	7395.52	8165.19	8033.29	4232.71	10859.5	10911.1	11067.1
M590T79			0.347876	1.36855	0.0686665	590.34	78.969	1397.84	2226.8	1088.29	994.943	1034.6	1704.7	1276.16	1682.03	2090.13	2298.93	1937.37	2275.78	1601.98	1647.45	1601.25
M766T77			0.994723	1.36821	0.106279	765.524	77.4145	19158.1	18881.1	12577.3	17782.6	13051.5	15119	16246.3	17115.8	18054	24363.8	19883.1	36464.4	16915.8	16239	16899.6
M325T77			0.550058	1.36804	0.0679273	325.272	77.323	4154.18	3846.46	3031.5	2947.07	4414.14	6481.77	3842.4	4542.9	7023.99	5726.65	5843.67	7050.48	4342.77	4336.41	4128.08
M678T356			1.77096	1.36798	0.330437	677.549	356.48	73584.8	63696	47500	41632	42494.3	52752.9	97324.7	139353	45668.9	99485.3	34281.9	23910.5	97755.8	98556	98557.8
M222T595			0.46573	1.36791	0.176761	222.111	594.875	1613.05	4888.68	2122.73	6135.79	3518.09	6198.14	5905.63	4056.41	4013.65	5214.01	6034.11	8257.84	9225.09	8982.68	8985.8
M769T255			0.568002	1.36788	0.154668	768.548	254.802	5500.9	3940.8	4787.62	4529.56	3260.68	6011.79	2565.47	4202.72	7193.44	9299.13	6776.59	8306.23	5240.26	5009.69	5013.8
M485T742			0.227564	1.36764	0.14898	484.971	742.215	947.63	2624.95	2368.2	1415.13	1932.07	1866.53	1490.58	3683.73	3168.93	2091.38	3048.13	1772.61	1402.43	1404.99	1469.75
M337T855			0.183262	1.36751	0.135028	336.934	855.375	558.888	767.831	677.572	613.481	1328	1028.27	674.818	1048.9	1604.83	896.237	1095.71	1481.55	827.506	888.928	888.915
M500T384			0.618924	1.36742	0.393167	500.275	383.748	15828.3	7843.1	3031.38	3225.69	5146.66	1549.41	9186.55	14449.8	5872.3	7946.24	6412.33	6213.91	7639.13	6254.57	7722.68
M765T623			0.214645	1.36723	0.0299257	765.236	622.649	1443.64	1004.82	1750.86	947.125	1331	1305.96	1547.23	1855.77	2250.57	1234.39	2000.29	1753.47	800.73	661.366	799.965
M129T714			2.06822	1.36717	0.0893205	128.952	714.297	104800	60031.9	85138.9	36114.6	97694.9	78615.9	119951	110962	79065.1	144413	105529	72255	124610	125089	125556
M481T730			1.28887	1.36712	0.128607	480.926	729.53	38144.6	42707.4	11338.7	19016.5	37351.1	44648	54558.8	47710.3	28805.8	32281.9	47516.5	53263.6	58036.5	51417.7	51473.1
M487T610			0.513956	1.36675	0.164355	487.303	610.432	2625.92	2384.56	7008.42	2921.49	5639.62	5561.07	8005.26	8355.31	4786.42	4858.76	4763.66	4959.03	5561.31	5465.44	5561.13
M144T645			0.388038	1.36653	0.105619	143.52	645.218	3336.75	1667.62	1009.1	3118.09	1492	2801.79	3396.32	3279.56	2514.48	3550.56	3455.59	2149.59	3137.64	3222.24	3123.82
M597T543			0.417989	1.36636	0.218135	596.943	543.266	1727.91	3072.53	3246.89	3136.43	4509.14	4623.7	8544.05	3609.01	3375.93	5271.62	3391.68	3567.4	4019	4922.96	4900.04
M673T732			0.325836	1.36633	0.28094	673.09	732.134	942.351	1254.12	2463.82	2440.04	2949.8	2351.42	1947.52	4531.67	2732.75	4536.6	1085.35	2110.77	1753.51	1717.06	1753.68
M610T70_2			0.368736	1.36591	0.179229	610.347	69.924	2066.67	2170.2	2027.39	3046.25	2341.57	2858.03	3175.95	2599.97	1520.23	3034.91	3645.58	5842.9	2245.25	2136.05	2141.85
M686T779			0.352348	1.36587	0.0641225	686.196	778.835	1598.38	3307.74	2318.07	3252.29	2766.64	3022.69	5611.22	2851.09	3450.43	3478.21	3298.92	3527.14	3131.51	3153.22	2737.83
M836T303			0.177344	1.36586	0.420747	836.499	302.673	1112.25	3704.36	8931.96	6292.11	13471	2038.3	8519.63	13893.5	10913	2424.48	8750.92	4054.7	10373.3	10585.6	10372.9
M325T70			0.145758	1.36556	0.208464	325.084	69.997	1268.87	450.439	1487	807.683	980.645	550.154	1461.7	1293.09	1696.57	482.808	976.848	1660.72	1099.88	1089.18	1088.96
M365T850			0.232859	1.36547	0.148261	364.911	850.209	803.959	1129.72	448.872	698.179	804.688	499.971	1491.64	791.339	898.372	765.532	1349.97	691.249	1148.98	1147.06	1178.2
M243T857			0.566968	1.36534	0.058142	242.991	856.524	3578.21	4360.68	4597.19	2072.49	5956.73	5039.39	6571.44	4069.9	6568.49	7286.95	5079.22	5383.02	4344.2	4813.63	4823.09
M276T329			1.83135	1.3652	0.413034	276.039	329.331	38601.4	147129	47404.7	6555.94	24518.6	112770	130002	112584	76656.5	104092	33840.4	57477.5	22342	26788.5	26934.3
M646T372			0.589343	1.36516	0.264485	646.497	372.197	3324.46	2738.47	9483.42	7373.57	11685.7	9122.87	6118.84	10996.7	10315.2	5935.25	8958.19	17371.9	5038.35	5276.44	5291.61
M464T38_4			0.293628	1.36513	0.213612	463.907	37.834	1525.25	1071.67	1455.78	1100.23	918.898	1943.54	832.721	1125.02	1394.11	2869.51	2396.6	2324.06	2190.57	1948.05	2210
M634T295			0.258403	1.3647	0.116053	633.519	294.609	2617.92	1828.26	2732.65	1934.65	2138.89	496.879	2917.49	1697.35	2995.65	2172.07	2833.64	3417.93	2992.3	2574.33	2629.6
M754T82			0.256813	1.3646	0.341979	753.551	82.2575	1284.07	328.377	1047.16	1697.63	227.261	1311.88	630.929	1033.07	1049.64	1361.96	1418.87	2551.72	1262.18	699.08	1268.87
M179T627			0.956246	1.36458	0.269493	178.872	626.706	77710.8	19101	69128.6	20791.5	21602.5	69919.8	73436.6	68928.7	77477	20914.1	70050.8	68891.6	50565.9	55311.6	55200.8
M615T49			1.78769	1.36455	0.264799	615.497	48.646	58052.4	89542.2	28578.1	21122.6	36293.1	41638.2	41213.8	64249.7	44514.5	105701	48207.6	71672.4	56525.5	56515.6	55677.3
M861T298			0.623252	1.36453	0.221772	860.607	298.127	14421.2	13610.1	14495.7	15745.7	12433.1	26435.3	36438.8	15833.6	31118.6	10910.6	16441	21809.3	16801.8	17583.8	16800.5
M771T540			0.328085	1.36422	0.108278	771.061	540.112	1246.45	782.112	1625.17	1527.05	1336.89	2662.39	1878.67	1981.32	2600.96	2276.93	1346.59	2439.13	1441.22	1515.27	1440.58
M768T675			0.397712	1.36405	0.189423	767.936	675.034	485.305	1672.61	2213.76	2851.74	3489.83	4328.67	3708.52	3503.47	3274.97	4199.97	1890.38	3940.59	4437.01	4171.13	4407.58
M775T732			0.425347	1.3637	0.162804	774.856	732.369	2246.11	1733.73	4571.41	3444.99	4107.15	4891.94	2927.54	5395.65	5116.03	7513.7	3628.37	4050.14	6868.14	6881.2	6439.83
M1038T727			0.239771	1.36355	0.162863	1037.9	727	849.754	936.628	1961.05	2635.16	2322.45	1317.98	3078.36	2900.35	2401	1771.46	1398.46	2117.28	4141.61	4031.67	4220.06
M626T77			0.468302	1.36326	0.211929	626.343	76.711	3136.51	2687.56	3663.91	2009.37	3800.27	3305.99	2598.59	2569.26	2427.74	7043.31	5207.87	5514.84	3308.29	3386.45	3835.29
M264T581			0.190133	1.36311	0.176088	264.038	581.459	437.571	472.458	654.405	436.082	690.563	1057.12	1137.56	862.724	661.452	1268.9	510.318	668.256	308.055	297.196	308.012
M200T518			0.488	1.36296	0.558713	200.056	518.297	5752.94	5085.79	1121.53	8442.29	2404.91	517.354	595.126	6728.36	777.099	12705.5	2593.56	8391.05	739.97	739.52	755.875
M621T71			0.276729	1.3628	0.226653	621.485	70.65	5506.65	4016.59	3496.37	2645.7	3154.28	4166.26	3478.95	3308.27	9803.52	3762.71	5368.05	5603.51	3158.29	3171.32	2731.05
M455T832			0.358542	1.36276	0.00555063	454.836	831.754	1729.39	1457.88	1357.63	1532.21	1107.3	1717.71	1864.28	2312.73	1558.59	2218.55	2253.78	1923.52	2100.62	2127.02	2280.29
M503T907			0.221925	1.36251	0.0825103	502.943	906.945	518.766	998.002	911.608	282.806	701.902	743.46	924.614	1104.19	774.071	1128.69	685.682	1046.08	628.785	632.072	702.245
M703T869			0.269352	1.36239	0.0943758	703.018	869.355	709.394	540.924	1224.85	989.9	868.875	1020.53	1205.53	1319.94	1004.1	996.462	902.693	1866.16	1149.68	1085.11	1083.44
M205T49			0.267816	1.36224	0.567635	205.025	48.553	1679.83	3638.23	1471.32	3177.79	1725.98	1118.39	1293.49	9011.63	2704.53	1488.94	1179.45	1774.36	945.587	977.28	986.32
M84T229			0.426287	1.362	0.453886	83.9906	228.655	6402.71	1026.58	10508	747.084	5313.7	8097.5	4769.01	9827.27	15527.3	6500.69	4179.61	2910.4	3080.26	2826.08	3080.77
M497T62			0.562551	1.36158	0.396987	497.25	61.721	5871.33	11643	3204.18	6117.16	2684.71	793.918	4721.91	11261.6	5497.53	8258.32	9326.14	2209.78	1896.64	2172.47	2172.86
M447T739			0.289794	1.36155	0.264444	446.846	738.617	970.156	1420.64	3165	4910.82	3843.14	3245.66	6780.36	3487.62	3337.46	4803.31	3367.96	2125.94	8833.15	8827.75	8443.07
M856T47			0.262052	1.36093	0.0913101	855.735	47.423	1070.32	1335.37	788.18	775.976	1102.72	1082.12	1653.8	1241.75	826.2	1391.61	1169.31	2093.41	1706.61	1648.85	1647.92
M592T717			0.726742	1.36076	0.0667658	591.951	717.028	9125.67	7332.34	10412.3	7927.61	8701.27	12865	17363.9	16246.6	8381.53	13324.7	10792.3	10588.9	26380.4	30461.9	30414.4
M511T597			0.217461	1.36068	0.196113	511.394	597.188	301.179	677.703	1128.7	1151.84	1192.07	1896.79	1805.15	1114.07	905.096	1896.45	1670.12	1247.1	1947.45	1947.47	1877.94
M317T376			0.195724	1.36057	0.244798	316.89	375.772	395.71	125.144	933.304	860.651	500.09	1496.94	1091.37	708.246	906.91	1113.9	1144.66	901.463	1986.26	1879.8	2089.93
M652T394			1.53691	1.36052	0.219033	651.533	393.898	57893.8	55520.1	23972.7	33314.4	21998	17973.1	52384.4	44926.8	22261.5	59699.1	39990.2	67361.6	13846.1	14040	13845.3
M803T79_1			0.62176	1.36048	0.212836	802.535	79.0945	7900.2	11883.3	7938.01	3737.4	9374.61	8210.5	8450.91	13154.8	18234.2	10876.6	4084.38	11922.5	6551.31	5064.88	6550.7
M564T399_1			0.170575	1.36043	0.540336	564.247	398.529	2309.57	2684.79	5877.06	1309.49	5285	1377.09	1642.06	1059.38	9961.54	753.247	4179.18	8039.11	1302.83	1312.12	1389.07
M653T621_2			0.336146	1.36038	0.0815773	652.782	620.539	1638.86	3644.8	2518.88	2343.11	1487.84	2575.16	3052.43	2299.02	2514.5	3873.13	4221.04	3369.1	2454.05	2743.68	2736.65
M520T74			0.739622	1.36032	0.174768	520.245	74.0205	8454.66	9745.32	11126.2	5881.32	7138.07	2377.92	8310.47	5248.86	15100.3	10237.3	11162.4	10779.1	8428.36	9048.56	8473.28
M748T311			0.718522	1.36029	0.266999	747.571	310.512	8872.39	9683.11	6976.74	7217.62	14071.6	13555	5566.73	18703.4	13157.6	9954.38	10114.3	24632.8	10617.1	10030.2	10005.4
M980T691_2			0.369301	1.3598	0.416083	980.012	691.376	2860.77	14652.8	8673.68	8757.96	6650.49	5289.66	4049.72	18078.1	19314	11971	7746.78	2595.48	7983.93	5933.46	8004.67
M591T635			1.13093	1.35978	0.182098	591.023	635.059	15289.4	21054.3	9500.42	30901.6	29474.4	8873.96	24563.5	34105.5	28280.3	31321.3	23414.1	14818.2	24932.3	30384.7	25006.2
M472T325			0.695013	1.35975	0.470852	472.341	325.239	73612.3	20229.2	18674.5	20471.5	19796.3	12929.1	32912.4	30134.6	72962.8	15431.9	57850.9	16035	18915.3	19883.1	19902.5
M843T84			0.410927	1.35971	0.105067	842.544	84.099	1921.77	2942.64	2646.87	3361.53	1144.89	2787.27	2615.58	3145.49	3102.93	5170.79	3266.29	2829.45	3577.6	3271.88	3306.71
M363T564			0.218743	1.35962	0.299086	363.088	564.014	1328.77	446.946	854.955	1782.06	1254.1	1758.21	2716.7	1077.36	857.257	1102.72	1589.14	2752.05	1454.35	1495.21	1454.23
M858T347			1.06199	1.35938	0.230753	857.517	347.029	15189	7543.87	14150.6	18715.4	12617.4	18921.5	9821.98	18040.8	11253	24512.5	20405.9	34418.9	21894	21886.1	21250.4
M250T58_2			0.659305	1.35932	0.14472	250.075	57.921	4321.24	8093.05	6665.32	2836.42	2708.7	5136.03	5965.53	8280.6	5976.54	8490.42	3973.09	7768.24	3006.37	3007.41	3068.87
M434T845			0.22964	1.35931	0.220415	433.941	844.817	781.915	968.021	701.61	399.979	350.417	1022.46	630.595	1563.93	605.284	1117.89	688.124	1136.44	562.696	620.37	625.257
M260T65			0.973952	1.35899	0.193542	260.095	64.628	19580.7	17927.3	8317.74	13851.3	8346.76	8431.23	11246.5	12524	27743.4	16258.7	14905.3	21224	6497	6495.75	6570.51
M288T799			0.244356	1.35856	0.128715	287.952	799.19	1367.84	1063.22	825.653	713.939	753.986	883.188	1862.06	778.821	1481.69	1466.9	1262.15	766.938	1297.99	1403.84	1298.46
M374T620			0.342808	1.35806	0.230048	373.831	619.982	2255.03	2031.57	2387.62	4917.32	1922.86	6924.59	5799.03	4374.19	3731.21	3002.38	5268.52	5582.09	5036.54	5196.58	5194.07
M781T637			0.620912	1.35792	0.101616	780.5	636.89	3125.12	4089.55	4949.44	5438.74	6569.75	6502.61	5937.07	5625.57	5663.49	10996.2	6078.82	7353.22	6663.87	3932.71	6486.64
M659T659			0.678296	1.35763	0.456355	659	659.443	13463.3	14879.4	14168.1	7581.65	16050.1	11940.4	25185	10704.2	703.983	15740.6	42211.9	11461.8	8834.85	10168	10090.2
M307T876			0.349229	1.3574	0.389359	307.16	876.407	2930.29	1542.5	2760.52	2381.36	2557.18	2903.99	2924.02	2802.24	2640.81	1867.32	2021.3	8208.24	2678.49	2552.68	2538.83
M304T614			0.242601	1.35726	0.189522	303.906	613.539	553.926	1364.53	2263.98	1347.08	1431.84	1541.07	1664.86	3200	1926.14	2065.97	1327.74	1355.32	1317.82	1316.72	1291.5
M809T543			0.342245	1.35686	0.248569	809.016	542.809	605.717	946.536	1305.56	2644.28	1787.09	2217.88	2531.92	1427.05	1365.02	3415.55	1587.44	2572.76	2538.15	2546.12	2356.9
M251T366			0.128839	1.35663	0.448286	251.048	366.265	2288.44	726.215	1891.35	2723.34	4767.96	2088.29	2983.16	1416.65	7857.71	2010.3	2640.74	2743.08	1873.97	1941.73	1880.06
M215T490			0.704322	1.35656	0.529482	215.032	489.977	2121.56	2209.59	3979.86	16028.5	7117.31	4235.1	8445.46	8165.62	2114.57	9666.66	1828.66	18197.3	2465.73	2219.7	2398.62
M409T691			0.415294	1.35644	0.0861236	408.957	690.946	3731.27	2942.13	3051.56	2725.38	4714.01	1540.24	4418.88	3851.22	2647.79	5567.76	4272.49	4613.57	5254.01	4300.86	4303.03
M1021T775			0.428764	1.35579	0.0819396	1021.38	775.381	2483.89	2037.98	3782.44	3482.92	4767.57	5372.09	4704.39	5816.4	5670.04	6015.24	3594.23	3928.02	6008.56	6286.89	6299.36
M380T851			0.272306	1.35573	0.146921	379.927	850.958	1176.21	799.485	1539.31	968.761	1475.24	745.438	2245.58	1189.47	1489.12	847.493	1328.24	1989.53	953.845	907.367	907.321
M741T733			0.353533	1.35568	0.162108	741.078	732.933	1437.11	2294.49	1585.46	1125.18	1363.86	2051.01	1104.94	1779.28	2758	2234.34	1956.37	3530.19	1852.41	1761.21	1763.88
M251T781			0.144991	1.35565	0.310468	251.14	781.189	2168.81	511.391	727.777	765.008	1067.98	1018.93	443.449	1103.35	2298.76	1470.84	1647.85	1521.98	942.161	900.182	899.613
M231T297			0.271008	1.35555	0.376814	231.25	297.04	2245.07	2017.45	6389.96	1249.17	1910.61	1923.34	5980.92	2199.09	3426.87	2191.91	2496.18	5035.4	2338.7	2427.94	2692.17
M597T714			0.4034	1.35547	0.233529	597.181	714.254	1923.72	3658.59	3319.44	5424.95	1416.76	3301.89	4111.05	5231.45	6220.71	5504.91	1986.45	2760.82	4676	4335.9	4670
M259T774_3			0.503694	1.35517	0.410193	259.045	773.938	17689.7	5148.97	14807.2	3747.48	4775.14	5069.81	15296	15574.7	15346.1	5324.55	15765.8	2129.7	10265.3	10259.6	7872.58
M584T683			0.401991	1.35507	0.170608	583.984	683.079	5048.38	3911.33	3630.21	743.127	1780.31	3845.87	3291.77	3732.79	5789.96	5058.54	3509.12	4308.84	3160.21	3299.51	3301.52
M336T70			0.581753	1.35466	0.0534911	336.253	70.065	7847.87	7915.22	8574.81	5672.91	8351.25	5472.79	7039.47	8469.76	11209.4	8376.77	10100.8	14185.2	7654	7652.35	7749.12
M308T71			1.113	1.35456	0.063864	308.267	70.524	17291.7	15916.3	16827.1	8236.97	12798.8	13678.4	16015.8	17415.4	22418.6	22890.4	11855.7	24202.5	15306.2	17153.4	17148.9
M338T632			1.00955	1.35452	0.224658	338.076	632.319	15557.9	37375.7	22928.1	21942.6	15512.5	15855.5	26690.4	52239.9	28438	25142.2	19703.2	22752.4	11625.1	11727.9	11604.5
M401T654			0.426729	1.35445	0.110405	401.123	654.055	2496.01	2268.55	6082.12	6586.35	6133.55	7517.84	6865.18	8308.18	6285.23	7385.78	8281.76	4976.05	10388.6	10570	10390.1
M302T779			0.774299	1.35414	0.310133	302.073	778.535	4961.91	5005.85	8050.97	13157.9	12368.6	12199.2	12573.8	18040.5	1306.49	18695.3	9413.95	15455.9	9341.47	9313.33	9664.2
M644T844			0.26528	1.35389	0.275111	644.178	844.447	462.241	1747.69	1045.69	658.907	862.755	2277.34	1584.89	2010.48	2131.59	1148.21	758.166	1917.88	476.475	521.457	520.927
M829T300_1			0.862825	1.35384	0.325675	828.541	299.839	18560.9	13766.4	13057.4	12431.5	18867.3	46904	21053.8	23199.1	21949	17572.2	38136.3	45407	18527.4	17596.4	18503.8
M302T892			0.779122	1.35382	0.162997	302.063	891.516	13017.9	14351.7	16499.6	3836.94	7453.29	11728.6	9741.92	15319.1	17600.6	15664.7	10701.9	21526	8512.31	8512.61	8244.51
M213T429			0.25816	1.35351	0.361539	212.969	428.832	2078.12	1579.62	494.373	500.653	1558.18	669.417	1537.91	2637.17	2383.81	880.591	1035.51	837.652	1449.23	1036.58	1425.87
M965T1303			0.234959	1.35337	0.243293	964.729	1303.14	793.973	1012.43	896.26	1622.99	1494.85	1189.86	2770.89	950.955	846.751	1713.01	1153.82	2052.19	1437.56	1263.02	1255.49
M387T667			0.2143	1.3532	0.194176	387.248	666.592	1398.62	352.876	1432.99	2348.08	1524.75	1524.33	1915.59	1195.36	1385.34	2548.09	2764.39	1803.87	3282.2	3509.05	3276.95
M399T54			1.43598	1.35295	0.0562114	399.325	53.8865	32133.3	43752.6	21972.1	18027.4	39258.8	29158	34580.5	39341.8	38827.8	52620.7	35360.7	48620.2	25820.7	25143.7	25822.6
M535T568_2			0.499098	1.35295	0.559707	534.924	567.903	1278.79	987.718	2036.57	10102.5	1010.71	10529.1	9395.99	10216.3	1881.72	2491.21	2050.74	9066.7	6649.61	6901.54	1498.33
M314T78			0.221324	1.35293	0.239677	314.14	78.371	737.833	797.711	595.745	387.564	1161.13	962.672	815.735	1534.21	617.435	1724.88	779.057	809.879	620.849	742.284	604.676
M809T678			1.11685	1.35284	0.044924	808.938	677.608	10208.5	20637.7	17352.5	18250.8	21582.4	21210.3	26356.1	25216.9	23824.3	27108.4	14678.6	30602.7	32143.6	33375.2	32093.6
M374T77			0.383577	1.35283	0.393972	374.362	77.299	2894.12	2826.93	3718.79	15014.7	3218.66	4762.32	3694.93	10240.7	7816.44	8318.23	7595.67	6213.85	4598.76	4372.1	4370.39
M574T793			0.271129	1.35269	0.329291	574.057	792.649	587.094	1427.58	1156.28	1425.36	1005.23	1896.34	1124.91	2305.71	1419.98	1176.2	783.546	3332.01	1147.67	1121.3	1122.66
M217T301			0.230299	1.35232	0.280231	217.063	300.684	1349.44	1454.03	430.176	591.271	1032.49	975.449	1946.04	839.719	837.379	899.088	2224.95	1140.73	991.737	918.17	989.593
M297T579			0.330558	1.3523	0.39656	296.901	578.782	2616.55	2261.28	368.49	621.709	2413.12	901.739	1689.51	2388.49	1004.22	3406.76	768.316	3160.74	722.451	895.445	718.224
M175T337			0.419293	1.35182	0.40676	175	337.318	1207.74	3257.18	7417.65	2729.51	3290.02	8783.95	11754.8	3505.9	4410.29	8100.59	3445.84	4857.4	4390.68	4633.59	3967.3
M264T407			0.351151	1.35123	0.381537	264.106	406.803	1788.1	3676.87	3856.96	2630.71	2616.52	2128.58	1382.81	4850.27	4472.23	2416.84	1574.46	7865.95	894.508	887.809	978.146
M611T84			0.484211	1.35075	0.272625	611.183	83.664	6139.14	5495.13	6032.93	5613.19	6286.39	6411.76	7218.91	17028.5	6191.22	6891.43	5526.84	5741	6913.49	7440.71	6858.24
M822T603			0.108872	1.35075	0.224288	821.865	602.898	832.266	705.087	731.051	583.863	944.058	745.682	864.002	666.395	814.482	916.16	2000.97	873.09	1387.59	1389.34	1424.89
M170T286			0.342284	1.35057	0.0926738	169.832	286.211	1718.61	1819.03	565.352	1802.54	2107.9	1627.87	3057.21	2290.66	1878.68	1517	2075.69	2202.02	1438.29	1501.4	1500.91
M707T307			0.757757	1.35037	0.20108	707.489	307.158	3272.24	3511.58	15258	14255.7	12201.2	14047.8	10287.6	19570	15261.5	14589.2	14426.9	10325.7	13231	13229.7	12964.9
M124T569			0.737102	1.35036	0.0374697	124.023	568.825	11301.1	5364.06	12694.1	11473.7	12777.6	13125	12376.4	11596.6	18306.3	16459.3	14232.7	17146	15487.3	14406	15489.9
M615T603			0.177443	1.35026	0.124285	615.205	602.913	918.684	430.889	576.88	1408.39	686.192	713.297	1187.04	774.567	1260.55	1180.21	817.139	1173.06	1405.27	1360.96	1351
M514T51_1			0.39963	1.34988	0.162778	514.354	51.075	3998.69	4055.78	2928.52	1803.09	1955.18	1515.36	2169.51	4156.32	2649.19	4563.92	3637.43	4768.16	2370.91	2326.25	1087.03
M113T602			0.095787	1.34951	0.6005	112.999	601.909	2331.94	1898.07	811.321	558.357	2545.39	799.312	1377.21	273.396	5570.22	539.573	3851.98	458.198	775.107	772.977	752.528
M322T70			0.42358	1.3495	0.648868	322.166	70.084	24431.7	1941.4	1274.42	2632.19	2051.83	1717.39	11533.3	6035.35	1729.86	2914.38	12798.5	10937.5	5242.36	3599.6	5235.72
M768T596			0.218622	1.34948	0.201851	767.923	596.223	131.397	1574.05	1788.63	1075.93	2101.79	1102.99	1935.3	2405.01	1419.72	1846.75	1682.06	1203.08	1681.64	1719.93	1681.61
M498T717			0.590601	1.34916	0.26493	497.966	716.753	16343.8	18614.2	17917.7	12649.5	9144.07	23090	35496.9	15789.7	35658.5	12378.6	18767.7	13801.6	34759.8	26997	34737.5
M242T555			0.384334	1.34851	0.255222	242.099	554.983	4495.37	2600.42	2219.84	1717.59	3061.17	3576.37	2428.95	2690.74	3492.83	3997.35	3723.91	7495.38	1797.84	1813.78	1813.91
M547T75_2			0.182455	1.3485	0.261155	547.357	74.765	1522.32	2782.59	2249.22	3028.14	1787.67	1484.31	1390.49	3035.37	5372.37	1804.61	2745.4	2985.67	1523.35	1609.44	1608.97
M458T79			0.434961	1.34849	0.0982825	458.251	78.647	1938.16	2488.33	2375.63	4720.74	3411.03	3330.94	3957.91	5313.04	4209.3	4869.22	3919.45	2361.06	3012.48	3010.39	2308.62
M635T829			0.718074	1.34831	0.0562046	634.745	828.598	4769.74	8008.51	6626.23	2052.27	7528.37	6740.42	7466.07	9054.43	8253.92	8800.05	6979.54	7615.04	6579.84	6580.93	6661.35
M529T626			0.494404	1.34827	0.222182	528.771	625.865	3256.07	3618.74	6362.33	2917.85	7272.48	3228.48	8365.88	5408.61	2665.46	8270.49	4545.77	6683.32	6504.12	6603.36	6502.47
M721T309			0.492707	1.34816	0.265732	720.581	309.296	4318.92	5917.25	3100.97	2606.79	1848.33	2598.02	3510.09	6232.48	3018.15	5823.2	2067.83	6837.55	5157.36	5454.05	5157.57
M320T67			0.338842	1.34796	0.651377	320.151	66.662	2285.52	3991.68	21502.4	2023.81	278.744	1380.82	12621.1	9362.81	2194.3	2293.91	2891.55	13047.1	1061.36	1061.18	1116.99
M296T605			0.184411	1.34786	0.159728	296.065	604.736	432.542	773.65	814.735	465.925	840.505	610.68	1237.51	448.582	939.444	1015.98	536.25	1130.17	800.528	817.994	801.806
M408T52			0.326332	1.3477	0.475346	408.35	51.708	4058.07	6030.15	773.905	2009.67	1986.45	6565.21	6608.61	1734.36	1864.26	2151.14	6872.59	9641.49	6069.58	5950.04	5950.18
M372T741			0.177319	1.34756	0.304799	371.924	741.414	1053.88	459.207	2513.1	883.331	1640.02	1489.44	3229.19	1176.73	1526.78	1796.67	1985.87	1117.75	2429.9	2257.52	2433.38
M314T456			0.28851	1.34745	0.233381	314.064	456.147	1176.39	1185.45	1666.6	779.733	976.646	1010.79	953.687	1085.43	1569.91	1391.88	1276.89	2878.92	956.005	958.615	966.619
M644T328			0.115591	1.34744	0.423324	644.318	328.012	252.281	463.079	2914.22	1337.99	1978.15	2174.85	3749.77	2428.85	2789.97	891.727	1632.61	796.467	888.402	969.958	898.704
M509T732			0.508737	1.34739	0.130621	509.085	732.497	2372.06	3672.83	5366.67	4450.14	5634.17	5978.89	6069.54	7979.73	5087.57	8974.09	4016.97	4891.28	6101.99	5672.43	6100.51
M812T206			4.92474	1.34704	0.602118	811.601	205.531	105047	130029	464812	119069	136001	1.58205e+06	519899	618351	120267	579169	459546	1.12021e+06	532231	532260	527889
M293T679			2.80839	1.34668	0.148688	292.959	678.629	186541	200668	323396	283759	173480	124836	320807	109876	313534	355676	299427	341510	340933	339347	340933
M645T675			0.953219	1.34595	0.0686501	644.932	674.761	4913.7	16786.1	15143.1	14370	16532	20441.6	16681.3	23565.2	19273.9	21593	15612.5	21969.2	22006.6	21918	24455.9
M789T78_1			0.647671	1.34565	0.32561	788.516	77.993	20686.6	3002.11	6146.05	5175.45	9621.22	8391.24	10075.2	9884.63	8305.78	14915.8	10405.3	17763.4	8561.77	8571.73	8821.85
M102T403			0.598201	1.34545	0.541339	102.127	403.133	6979.55	24890.5	30000.8	1972.53	24960.1	25851.1	9330.01	55160.6	39271.7	740.709	6819.92	42939.3	6101.04	6366.58	6357.49
M270T876			0.228291	1.34526	0.121965	270.095	875.829	950.432	1275.72	597.107	1115.52	1093.88	1035.85	870.031	902.955	1428.07	2092.02	1343.01	1527.66	1239.48	1263.56	1363.86
M309T74			0.799785	1.34519	0.0723772	309.171	74.374	6019.38	7972.47	10582.6	3920.19	9507.36	9919.64	9663.46	8962.87	12925.7	10353.2	8679.55	13879.2	9297.17	9720.51	9718.05
M257T519			0.249684	1.34488	0.159757	256.964	518.962	661.458	1052.86	1885.94	497.507	1355.52	1343.88	1326.79	1721.99	1234.38	2176.75	1206.03	1475.46	1372.44	1415.43	1424.82
M731T47_2			0.116602	1.34447	0.525299	731.413	46.814	1752.29	2668.62	857.299	1658.27	1985.04	834.194	723.512	2856.2	5794.41	1130.45	597.674	2014	2222.68	2262.69	2222.83
M791T83			1.02742	1.34447	0.101219	790.538	83.227	6746.32	15830.9	14696	21228.4	9869.41	19417.3	11691.9	20721.1	20543	20412.8	23021.7	21638.3	23020.5	16144.7	23183.8
M821T77			0.771474	1.34447	0.204116	820.616	77.4675	9839.1	14003	34766.5	13532.2	31407.7	11817	18745	33923.3	26901.3	25567.2	25983.6	23984.9	8339.04	12861.6	11329.2
M270T36			0.0644986	1.34445	0.64958	270.079	36.34	3112.09	2795.75	743.211	2525.24	1681.47	610.946	1628.08	1555.28	9172.76	573.629	711.475	1777.92	574.749	650.822	564.674
M552T273			1.07863	1.34426	0.2465	552.271	272.682	16789.3	10252.8	36512.9	6026.47	21293.9	25722.2	29170.1	21537.2	34785.9	32674	14894.5	23675.6	19589.4	20568.4	19606.3
M785T235			1.90936	1.34414	0.551011	784.58	235.48	16365.4	14541.1	307064	61329.7	71809.1	103509	85101.4	218633	56202.1	217152	72860.9	122418	105630	116598	105895
M790T184			0.565476	1.3439	0.440263	789.526	183.882	1784.84	575.671	6010.57	11588.3	3266.18	4963.72	1042.65	7151.71	6377.68	5816.19	7358.17	10137.2	6517.63	5873.39	5883.57
M417T68			0.313601	1.34387	0.250355	417.28	67.776	1266.26	2292.23	783.065	2583.61	1880.14	789.74	1354.89	2832.44	2169.35	3331.74	1742.69	1463.43	2073.49	2079.24	2229.41
M676T49			0.259432	1.34266	0.300523	675.52	49.321	872.693	1334.71	1325.21	1247.46	565.619	1136.65	598.056	1097.5	1300.76	2847.52	1147.69	1712.1	1299.99	1201.75	1295.93
M751T69			0.348519	1.34238	0.358297	750.502	69.141	2465.26	1949.12	1844.26	1803.12	883.536	2527.76	862.231	1125.55	1975.12	3611.77	2899.22	4927.32	2096.36	2155.66	2019.22
M451T712			0.459064	1.34234	0.224282	451.327	711.966	2680.98	2643.4	6483.65	5031.75	6121.83	2815.16	5054	3594.15	9246.67	7251.19	5350.46	4104.74	4880.71	4388.54	4371.61
M758T309			0.633783	1.34225	0.244716	758.154	309.101	7055.15	10843.5	9559.53	5571.05	7372.74	9762.84	7501.6	14094.5	9265.56	6990.78	8732.91	20748.3	10010.3	10009.5	9929.02
M749T620			0.384045	1.342	0.100584	748.76	619.69	1474.01	4079.15	2717.17	2896.05	2967.75	2637.24	3431.67	5492.33	3483.99	2924.23	2890.57	4284.44	3698.14	3649.58	3883.09
M176T626			0.21857	1.34173	0.140171	176.319	625.67	599.095	644.921	1411.95	1197.77	439.665	1540.43	1530.73	1166.28	1166.66	1400.52	1065.49	1497.73	1030.78	1020.15	841.096
M651T302			0.682156	1.3416	0.120486	650.519	301.545	11616.8	12922.7	8572.37	9395.89	9298.93	8616.65	12856.2	12473.6	11703.2	8870.53	12687.5	22472.8	10443	10363.1	9411.05
M112T182			0.575402	1.3415	0.154862	112.015	181.524	3586.84	3749.91	5298.94	8045.55	3154.18	6823.65	6397.12	9138.48	4908.97	4344.14	8261.67	8078.69	6562.17	6151.15	6118.86
M192T407			0.432503	1.34144	0.579683	192.068	407.203	8385.12	2091.67	1626.69	3006.06	2701.57	2506.07	11923.3	6029.32	1084.21	5664.37	1223.28	1329.81	12148.6	12200.4	12765.1
M891T678			0.806465	1.34142	0.0524307	890.941	677.914	7849.27	17512.2	13689.1	17629.6	16605.3	16652.6	14712.3	23275.2	16050.7	20182.1	26045.6	20378.6	21254.1	21126.5	25104
M248T643			1.40962	1.34126	0.328223	248.149	643.337	17304.5	16168	23130.7	64583.5	32063.7	51290	62044.7	28812.9	25503.7	58470.7	30600	68909.9	64139	64101.1	65565.4
M739T674			0.266158	1.34046	0.277888	738.915	673.729	198.614	1288.97	973.263	964.118	1143.22	1735.53	1389.83	978.35	814.228	2230.32	1069.68	1967.48	2011.54	1921.68	1922.22
M879T790			0.191228	1.34024	0.0669442	879.094	790.387	419.819	1105.19	655.205	728.45	558.34	560.634	1019.06	1013.88	956.049	948.835	737.406	722.764	505.147	503.23	464.781
M302T766			0.782579	1.34003	0.22	302.074	766.407	6535.19	14554.3	7036.57	11439.4	9262.39	9973.27	9909.9	13418.7	13138.4	13448.5	6172.46	22707.4	9033.6	8917.95	8918.6
M264T38_2			0.388722	1.34002	0.43837	264.303	38.3035	5811.72	4231.83	1951.35	2362.77	2096.39	3504.94	4894.36	10421	2371.76	3571.6	2115.3	3371.5	3785.58	3782.39	4123.37
M633T676			0.493416	1.33997	0.137878	632.951	675.615	1217.45	4297.38	5173.73	7038.45	5065.66	6615.61	4611.74	6765.59	8592.58	6971.24	5200.15	7265	7405.28	7387.87	7824.36
M329T228			1.77663	1.3399	0.406398	329.232	228.012	68726.2	89947.6	26075	7989.3	25560.3	38470.8	46153.6	49897.8	33669.5	54191.3	48736.3	111397	46027.6	42411.6	42667
M522T1224			0.202488	1.33989	0.146861	522.354	1223.86	1163.33	1409.97	914.301	1056.16	239.765	522.631	1097.56	1480.01	1296.76	1138.02	1144.79	952.54	1074.43	966.009	1073.8
M616T46			0.124501	1.33976	0.235807	616.047	46.16	593.11	469.914	903.717	330.922	223.496	452.809	376.072	908.069	575.787	813.808	858.065	452.609	248.544	245.632	241.167
M623T317			0.18777	1.33975	0.389435	623.086	317.445	342.871	131.38	1738.67	792.891	938.932	1013.59	1063.96	1378.35	1246.68	1796.98	267.142	889.793	1594.66	1729.22	1594.49
M298T75			0.2704	1.33966	0.500726	298.03	75.429	2184.46	2457.74	2802.35	3177.49	2210.56	789.301	1464.9	3276.69	8001.29	2617.15	2071.15	817.548	2506.09	2661.41	2505.44
M939T724			0.362362	1.3394	0.0984754	939.448	723.955	2215.98	3370.94	2007.09	1068.23	4509.59	3332.91	3296.01	3889.56	3982.17	3468.56	3564.94	3905.23	2073.66	1909.04	2071.33
M592T480			0.160623	1.33865	0.185509	592.262	480.333	2013.35	1071.22	1014.85	758.114	865.578	1406.56	1439.14	1581.21	1692.22	708.682	2270.31	1852.59	1253.33	1364.8	1251.19
M342T75_2			0.57675	1.33855	0.0176246	342.245	74.7175	6535.59	7489.86	7686.44	4892.64	6708.48	7776.58	9705.53	10580.2	11093.8	6472.01	8304.42	8844.27	4541.42	4519.57	4802.67
M862T674			0.2431	1.33821	0.0868668	861.922	673.752	473.484	1565.67	1812.3	1105.2	1394.12	1603.68	1542.87	1759.07	1918.61	2303.96	1754.6	1365.64	1557.98	1546.91	1717.33
M670T74			0.104061	1.33788	0.153179	670.296	73.781	695.164	720.036	794.373	667.598	484.356	651.799	854.511	976.274	1433.7	496.592	1043.03	565.228	530.379	596.842	536.408
M1026T721_1			0.374694	1.33784	0.224701	1025.93	721.131	2859.4	2440.45	2884.05	3081.98	5946.48	5724.88	6086.76	2099.51	5274.98	7619.02	5493.37	4112.7	6465.4	6309.73	6464.3
M299T726			0.945943	1.33743	0.0696128	299.024	725.551	13262.6	13177.5	15583.2	10874.4	16063.4	9579.05	20468.9	22803.6	20551.9	12699.4	17354.9	11163.7	14926.2	15727.6	14933.9
M522T318			0.481618	1.33741	0.190012	522.271	317.645	1903.93	2891.07	6869.15	5026.95	7274.61	8123.73	9593.93	6643.51	7273.26	6953.52	8427.83	4024.71	6169.85	6496.09	6161.1
M462T349			0.452326	1.33733	0.539471	462.368	348.762	841.519	306.599	5126.27	1148.09	4823.42	10857.5	2006.23	3068.26	7410.7	4769.4	3679.15	9963.14	722.414	937.717	936.497
M825T532			0.370598	1.33726	0.156073	824.993	531.637	3263.36	2261.22	3592.62	2387.79	2934.23	3416.75	4909.91	2561.81	4045.76	4138.19	6159.44	2063.05	5320.98	5220.04	5367.53
M457T390			0.204429	1.33722	0.18432	457.062	389.696	1012.53	560.247	607.278	713.808	737.112	959.072	1544.28	349.716	1068.72	1171.79	824.981	1178.41	708.372	724.404	708.435
M223T899			0.198348	1.33714	0.154864	223.082	898.978	1186.01	915.509	418.483	505.766	472.912	902.158	958.082	1087.64	767.525	772.55	892.731	1405.98	1369.05	1290.17	1290.3
M185T268			0.505467	1.33699	0.680822	185.003	268.45	21197.2	9859.52	1664.42	7180.37	6441.68	3434.44	40485	2200.15	7096.21	4184.72	3760.52	8825.43	10325.3	10424.4	5046.19
M211T78			0.653756	1.3369	0.0262461	211.133	78.371	4571.08	6143.57	5185.23	5705.05	7536.67	6144.16	9433.43	5593	8039.89	8552.8	9208.45	6345.92	5095.4	5813.3	5247.49
M255T75_5			13.6977	1.33683	0.0433789	255.232	74.928	1.35918e+06	1.73145e+06	3.26436e+06	2.28223e+06	2.9875e+06	3.564e+06	3.43318e+06	3.23724e+06	3.63109e+06	3.41083e+06	3.08102e+06	3.5114e+06	3.46679e+06	3.47019e+06	3.54457e+06
M627T395			1.09405	1.3368	0.0635965	626.521	395.149	29062.2	25943.8	13878.5	21998.4	14049.8	14583.1	25966.5	31978.3	28496.5	26668.5	19299.9	27358.9	7869.34	8078.21	8041.7
M554T329			0.774813	1.33679	0.301891	554.286	328.599	6818.04	2905.39	29166.4	10417	31385	24824.6	29728.2	24246.5	26479.3	24615.6	14972.2	21011.9	19531.8	19321.9	18571.9
M788T46			0.384375	1.33672	0.485316	787.571	45.98	2131.79	6352.42	1316.62	3539.97	3186.4	4070.91	890.417	1097.85	2302.75	7968.32	7435.36	7839.2	2972.14	3745.95	3745.94
M657T693			0.255411	1.33665	0.194308	657.011	692.827	638.974	3739.28	1754.77	3604.57	2640.17	3136.12	4102.93	3973.64	3877.71	3455.55	3774.03	1552.75	1550.61	1563.75	2029.68
M180T405			1.33052	1.33639	0.447907	180.032	405.402	25296.5	69726.5	32452.7	9394.45	19719.2	43631.8	206.999	62025.4	46751.8	69084.3	23238.4	66266	84.984	84.4834	94.7631
M257T568			0.236189	1.33613	0.170438	256.964	567.812	1196.4	849.82	2387.39	1326.12	1133.23	1143.69	2408.11	1744.21	1024.5	2303.38	1805.28	1452.54	2495.77	2624.16	2614.57
M738T1033			0.534321	1.33604	0.362872	737.563	1033.17	3738.98	3714.24	4418.85	4432.92	3483.18	5971.87	3019.38	2720.99	4031.78	8648.32	4360.78	11635.1	4055.13	4064	3939.11
M335T69_2			0.415928	1.33601	0.446345	335.075	68.936	6819.22	3041.1	1958.34	482.429	1678.36	1067.15	3803.76	3382.31	4704.19	4396.32	1377.3	2438.56	2303.53	1948.5	1557.74
M561T934			0.332989	1.33576	0.293324	561.167	933.741	979.936	3607.91	2402.79	805.803	2911.06	2487.93	2071.16	2947.12	5306.46	2674.85	2456.62	2169.71	1374.9	1559.4	1408.03
M682T881			0.208534	1.33573	0.193906	682.003	880.808	1129.52	982.614	720.171	876.501	352.459	1022.94	1184.46	1405.34	679.337	1333.64	1611.48	576.859	1240.53	1262.11	1262.01
M427T514			0.245936	1.33556	0.2709	427.219	513.502	1604.64	922.411	763.675	851.147	756.19	820.29	933.133	1609.26	516.961	1623.07	875.417	2079.34	844.846	845.822	857.862
M253T74_2			0.304482	1.33516	0.0381552	253.412	74.328	1593.24	1169.77	1341.94	1017.23	1115.42	1563.16	1236.03	1728.86	2077.62	1391.89	2210.83	1770.01	1671.1	1629.51	1630.78
M136T1332			0.0889629	1.33491	0.392901	136.021	1331.69	1444.41	1057.28	1691.82	1315.7	1103.91	1135.08	770.573	1089.32	1490.77	1569.43	4015.22	1407.83	1554.81	1447.61	1446.57
M303T892			0.277905	1.33484	0.144407	303.093	891.848	1934.92	2151.53	2204.23	1182.24	2050.43	946.584	1380.93	1872.97	3193.11	2812.1	1840.27	2876.31	2027.4	1815.34	2030.74
M254T75_1			0.284242	1.3348	0.509354	254.049	75.472	4520.13	3556.63	3276.3	3122.72	1616.17	3451.55	5254.44	1589.73	11581.9	3501.18	2086.37	2073.11	1986.58	2033.77	2295.87
M279T479			0.219494	1.33475	0.209793	279.09	479.141	542.749	712.579	686.687	1122.18	836.736	666.512	1625.59	730.889	1025.52	685.531	613.451	1415.39	757.595	758.282	788.154
M167T79_2			0.388792	1.33471	0.459291	167.143	78.838	1752.76	2766.45	2059.45	5721.54	4427.18	2186.47	3392.44	3948.87	2807.77	2730.68	10134.9	2229.84	2901.28	2939.61	2772.99
M171T76			0.528257	1.33464	0.346044	171.101	75.7005	5331.29	8586.84	938.042	997.129	6840.72	2240.9	5628.71	3649.75	5541.52	4890.81	6864.81	6703.53	3714.72	3743.21	3942.45
M440T49			0.123565	1.33438	0.64889	440.379	48.9665	963.675	1502.65	1336.69	5157.95	443.081	112.958	563.344	5796.95	2767.12	2510.89	692.706	368.339	478.312	742.077	454.435
M238T502			0.459996	1.33409	0.184746	237.973	502.079	3906.98	2327.16	1700.28	3505.84	7090.25	6174.59	7246.82	4733.41	6292.6	4966.66	4674.65	5044.67	6012.58	6001.94	4864.85
M594T75			0.481608	1.33402	0.0261628	594.28	74.836	3477.06	3202.79	2465.18	2066.8	2832.7	2618.07	2805.74	3121.68	4342.34	4671.07	3636.56	3650.92	2338.68	2449.81	2615.28
M241T811			0.189707	1.33379	0.126223	241.314	811.239	606.659	978.422	912.021	982.313	1714.1	1471.42	1888.76	1725.68	1543.57	1459.49	1445.74	826.411	1417.67	1464.79	1465.02
M422T862			0.244344	1.33377	0.0312841	422.105	861.749	1668.67	1132.74	928.823	917.605	1394.45	1001.83	1639.27	1733.81	1843.51	1568.64	1442.86	1167.17	1042.75	1118.23	1125.06
M136T262			0.52757	1.33365	0.283603	135.894	262.252	1159.18	5468.41	4917.22	4954.04	4702.96	4823.77	4436.15	8251.53	3735.16	2477.23	6414.2	9394.82	7535.3	5745.08	5682.35
M833T334			0.342055	1.33359	0.306799	832.517	334.315	3051.98	1512.02	3109.41	1494.05	3508.78	4065.65	2503.28	2724.48	3030.39	2610.35	7234.41	4223.81	4195.76	4253.85	3726.89
M93T1326			0.440072	1.33337	0.278942	93.009	1326.28	5431.89	648.76	8617.8	2433.89	5227.88	4226.52	5888.39	4887.11	7357.41	4695.37	8248.48	4373.23	4793.03	5083.8	5075.78
M325T468_2			0.442025	1.33328	0.520565	325.087	468.127	10162.1	1557.91	2212.6	2561.24	3804.44	3767.04	7329.79	3450.06	3521.34	2888.73	2658.34	12237.5	2626.74	2604.68	2626.39
M974T680			0.247594	1.33323	0.597969	973.948	679.875	1888.81	2978.8	25624	6641.03	2798.85	21176.2	22921.8	24807.1	3386.49	3867.76	23399.7	3087.79	6981.72	5018.82	5307.94
M720T578			0.164911	1.33314	0.309615	720.47	577.731	83.1094	1411.35	2442.31	1634.89	1313.68	2335.44	1888.47	3302.19	2559.2	1584.86	1976.85	981.066	670.364	869.738	667.105
M193T78			0.342588	1.33293	0.221876	193.122	77.658	274.624	2332.73	2391.52	1205.06	3845.58	3158.22	3304.06	2209.27	3296.18	2715.67	3396.09	2683.65	1870.56	1869.88	1790.58
M83T66			0.506947	1.33273	0.12756	83.0246	65.9345	2019.32	3384.96	5039.74	3694.6	4711.15	5031.65	6924.61	3890.01	3959.37	7533.22	4667.52	4852.67	5677.27	5683.16	5923.24
M599T542			0.291691	1.33271	0.0262007	598.939	542.009	1248.03	1003.99	864.259	865.154	1444.27	888.74	1177.59	1449.48	1777.06	1461.31	1377.22	1172.68	1085.09	1302.61	1108.48
M426T795			0.440163	1.33268	0.177432	426.112	794.907	2964.72	4145.01	1361.53	2292.32	5220.16	5681.42	5357.47	6243.05	3889.22	5765.31	3626.37	3991.21	5190.53	4666.17	5157.41
M430T670			0.159201	1.33255	0.298728	430.16	669.558	382.259	155.949	541.753	670.275	420.614	1103.66	687.44	740.247	534.901	1202.73	641.864	556.275	1091.77	1091.53	1023.53
M719T590			0.240964	1.33251	0.52011	718.553	590.159	581.818	3457.25	753.434	729.478	1414.75	1155.03	1103.93	2138.32	1079.69	4008.85	1969.39	482.141	1656.97	1657.8	1701.17
M419T780			0.344444	1.3321	0.290697	419.215	780.225	10031.2	15745	16631.1	13045.1	17599.1	14977.3	19153.7	20111.5	35454.4	13177	24508.5	4858.39	9685.22	9325.26	9087.65
M423T62			0.385977	1.33189	0.621351	423.145	61.736	848.505	2337.87	14601.6	3323.54	2273.81	3958.55	2698.48	15693.9	1895.7	3958.38	8503.44	3669.03	2863.51	3276.71	2868.23
M886T395			0.439692	1.33167	0.179876	885.544	394.753	9744.4	4013.08	2639.28	5326.33	3297.45	5941.66	9447.23	6478.91	6202.1	5580.68	7281.92	6240.62	5060.96	5065.8	5298.79
M829T349			0.363473	1.33162	0.173433	829.486	349.196	1762.29	930.028	1913.51	2781.98	1233.62	2157.01	1674.36	2310.13	1628.62	2444.16	2636.77	3658.8	2019.49	1947.16	2020.46
M784T306_1			0.51983	1.33101	0.196681	784.08	305.799	11286.2	9701.16	7146.61	7962.47	8360.53	7180.6	7326.02	12884.3	19443.3	8513.1	7126.83	13436.6	9260	9078.98	9257.94
M677T588			0.64211	1.33092	0.0998216	677.495	588.21	4402.36	4271.06	6489.83	3749.17	6588.93	7357.51	6157.49	5287.76	8140.53	9205.33	5371.2	9570.08	4303.5	4769.05	4382.91
M242T824			0.22654	1.33088	0.159167	242.006	823.645	1092.62	1006.18	701.72	794.673	895.838	806.111	1770.38	910.265	1327.22	828.618	1566.78	646.628	1238.45	1238.18	1221.17
M445T802			0.462741	1.33075	0.214984	445.129	802.163	5657.11	2653.82	2650.99	4688.56	2576.61	2825.95	5510.58	5456.42	4379.92	6570.84	1640.96	4457.61	1989.13	3141.82	3146.2
M1043T713			0.571232	1.33075	0.116282	1043.47	712.674	6407.51	5571.06	7928.41	8826.39	9641.87	5541.21	11982.4	6839.54	5102.04	11565.4	11285.1	11667.4	9850.99	9881.02	10237.2
M359T609			0.21335	1.33062	0.208509	358.797	608.689	924.099	586.655	518.308	691.229	1297.54	599.848	1462.67	1071.53	433.393	1274.65	1059.35	842.776	838.831	870.147	972.912
M325T878			0.209279	1.33022	0.523876	325.062	878.085	537.027	1615.12	984.511	574.059	960.919	796.795	772.896	838.003	716.522	793.943	809.173	3343.67	564.526	564.079	551.555
M745T309			0.88953	1.33009	0.245189	744.551	309.034	14637.6	21776.3	8889.61	21487.9	15478	11308.4	13176.9	16125.1	18254.9	21233.2	17870.5	37806.5	21597.1	21604.1	20061
M567T962			0.240089	1.32978	0.0889349	566.595	962.416	1190.21	469.866	1078.89	564.767	547.232	1128.59	1193.02	1075.69	942.661	1048.57	1074.57	1287.24	1077.12	1080.65	1019.08
M534T673			0.238098	1.32972	0.0465296	533.91	672.764	685.711	713.372	1229.22	911.062	1365.84	1179.75	1445.71	1117.71	1297.48	1441.68	1106.12	1682.6	1430.4	1372.34	1428.45
M627T79			0.322355	1.3296	0.15054	627.338	78.8445	1820.59	1897.37	1632.46	964.658	1240.06	1351.19	1691.87	1446.76	1199.42	3058.57	2383.68	2061.54	1521.01	1463.63	1517.3
M359T746_1			0.404547	1.32903	0.0909857	358.978	746.223	3756.95	2033.83	5677.18	3516.42	4674.69	6370.52	6321.09	5383.54	4947.21	4383.06	6667.38	6891.69	4387.19	4392.6	3708.92
M856T71			0.350699	1.32897	0.361632	856.481	70.784	1066.26	4560.49	673.172	3579.16	4841.25	1360.99	4796.01	4796.82	1987.54	3980.09	2019.26	3791.9	2887.42	3481.35	3482.6
M544T894			0.192125	1.32887	0.151812	544.108	894.147	374.374	604.114	771.123	238.747	856.099	511.07	485.667	770.806	928.372	907.564	759.947	606.702	489.744	489.168	529.425
M659T894			0.231094	1.32846	0.178834	658.741	893.76	458.659	1202.59	977.194	314.226	1065.31	1127.14	990.773	1405.77	1031.89	1272.63	678.286	1455.75	788.343	790.595	835.101
M1131T710			0.784695	1.32846	0.168524	1130.53	709.665	9245.2	17804.5	11735.8	6810.19	12290.3	8222.38	9764.17	20124.5	12787.5	13500.1	11346.6	20299.3	6533.04	1860.52	6410.33
M389T329			0.480653	1.32835	0.365534	389.268	328.523	2428.5	1970.03	14220.9	4160.69	10221.7	15706.1	15968.3	11751.8	11913.3	8666.79	6581.49	9819.58	4511.98	4999.16	4299.46
M209T52_2			0.26627	1.32818	0.381917	209.323	51.6565	1367.07	2679.47	903.336	568.384	1020.63	784.595	975.257	1227.36	2102.71	2943.84	1273.72	1203.99	895.368	688.719	889.907
M276T74_1			0.653729	1.32812	0.430501	276.089	73.543	10624.5	9684.42	5903.02	3220.93	5472.64	4205.22	2681.82	5330.49	6185.35	9375.51	9481.56	18889.1	5482.21	4901.89	4903.94
M79T88			3.2967	1.3281	0.0093425	78.9183	88.29	140673	77102.3	164747	151523	134479	136076	171452	196100	158750	194122	168247	179921	134845	134929	138270
M626T49_2			0.28705	1.32809	0.335749	626.411	48.856	3216.38	2569.22	5075.17	3299.67	2985.74	2212.19	2428.43	8364.37	1856.37	3580.95	5459.4	4020.14	1405.07	1313.72	1408.88
M290T310			0.172134	1.32798	0.37719	290.142	309.517	790.39	459.069	325.324	952.105	697.163	356.478	628.806	581.821	1677.47	610.414	828.219	428.146	447.775	431.772	449.697
M574T328			0.299295	1.32766	0.393307	574.342	328.498	1803.46	1884.31	3017.74	1247.52	3483.83	6779.49	7322.54	3696.57	4641.52	3305.76	1847.72	3371.02	843.634	843.776	868.698
M194T755			0.65271	1.32762	0.0397359	194.117	755.49	6906.08	4436.01	9297.66	10180.4	9297.54	10568.2	12436.2	12487.3	11426.2	12343.2	8308.19	10290.5	15188.8	15501.3	15500.9
M267T74			1.41609	1.32759	0.0520534	267.232	73.606	22394.9	26282.5	31258.6	13024.3	21911.6	31646.7	27008.3	32966.8	31422.3	40731.3	26208.6	36179.5	29368.3	30023.9	30010.5
M229T701_1			0.277025	1.32717	0.257988	228.931	701.452	1033.61	643.27	1969.02	1598.09	1644.06	1577.32	2952.26	969.673	1946	2326.08	871.37	2169.57	2799.46	2799.94	2652.65
M613T732			0.369902	1.32686	0.266793	613.07	731.872	844.954	2725.33	3340.06	3099.82	3115.79	3779.34	2762.65	5916.77	3518.33	5522.27	1922.02	2788.95	2421.23	2471.57	2421.28
M305T67			0.426355	1.32672	0.557574	305.132	67.218	2741.63	10331.2	1358.5	1679.4	1598.06	1753.54	5302.46	8007.47	5134.18	4071.08	1099.71	2206.07	3069.12	3079.22	2078.14
M619T772			0.620721	1.32669	0.242116	619.196	772.166	5377.7	10197.2	6581.77	7116.2	7256.7	6105.29	6649.82	16856	6467.07	12024.7	6029.89	8536.01	6908.58	7440.88	7153.97
M715T677			0.606943	1.32624	0.0342842	714.955	677.096	4343.22	5763.68	6523.86	6439.8	5434.1	7649.6	7319.91	6338.86	7262.3	9401.97	7086.56	10539.7	10146.3	10722.2	10142.3
M274T54			0.149649	1.32614	0.300916	273.93	54.496	94.5029	395.924	895.889	287.752	511.313	1018.08	886.549	763.084	688.711	726.843	768.958	414.096	712.955	590.328	711.213
M380T77			0.373516	1.32605	0.15357	380.206	76.9075	1189.11	1340.76	2920.7	2039.26	3002.44	2580.94	3110.61	3168.33	1748.07	2046.86	3727.84	3534.04	2303.73	2303.62	2393.08
M1186T690			0.311953	1.32601	0.389016	1185.54	690.149	3477.92	4235.73	1414	1823.44	2207.68	1125.26	2333.34	1130.24	3453	3231.98	2547.06	6245.18	962.829	947.904	1085.56
M458T75			0.398886	1.32586	0.175698	458.237	75.248	2725.66	3815.08	3231.17	727.504	3483.45	2313.77	4299.14	3582.82	2533.76	3359.19	2690.68	5141.49	1888.4	1926.08	1996.79
M606T372			0.374723	1.32586	0.436726	606.447	371.533	1459.65	1913.24	6095.05	3558.86	8454.3	4027.48	4954.29	2795.86	8722.77	3129.55	3631	10587.3	3539.23	3555.1	3356.71
M306T67			0.0775296	1.32584	0.470657	306.206	67.492	2117.7	2592.11	1843.59	503.508	4678.52	1962.36	791.116	2346.68	4839.03	1881.84	6103.16	2199.19	437.948	518.637	639.962
M203T407			0.15855	1.3258	0.538145	203.047	406.7	71.3152	1266.34	944.277	132.316	771.791	935.887	93.564	1834.54	1349.33	1044.28	33.3635	1109.79	60.2377	59.5422	37.9331
M229T845			0.250786	1.32503	0.566737	229.117	844.734	19818.5	8332.63	5546.72	8574.39	8281.77	3918.72	7153.83	4540.66	33849.8	9941.85	7624.9	9067.19	3992.4	4224.1	3992.78
M783T304_1			4.97176	1.32503	0.376651	782.568	303.726	724047	657874	451926	276201	599006	1.29511e+06	578041	606739	1.14449e+06	544791	728965	1.70262e+06	714648	715009	755341
M779T281			1.40498	1.32488	0.38969	778.536	281.074	20509	26344.4	279639	172626	220097	94953.5	251479	239390	141367	122182	192979	131273	125541	115094	125464
M295T53			0.351349	1.32475	0.100228	294.967	52.72	1649.6	2441.49	1256.13	1883.32	1399.09	1815.16	1927.56	3500.99	1629.77	2333.82	2261.18	2183.4	1771.57	1773.49	1842.29
M610T248			0.944332	1.32473	0.276441	610.182	247.685	12471.3	14520.7	11814.3	14537.9	12534.1	13652.4	11934.4	15370.1	6987.53	27036.6	13795.1	30232.5	16930.1	16974.2	18994.2
M694T72			0.394472	1.32472	0.212532	694.404	72.492	4460.72	2914.26	2166.15	2516.24	2406.68	2998.9	3268.35	4298.91	3053.37	3240.91	2519.88	6752.03	2822.47	2428.98	2828.31
M287T296			0.170268	1.3247	0.478673	286.923	296.219	161.624	87.5705	499.523	460.384	1702.18	1016.36	1482.18	476.825	698.224	977.29	607.035	961.4	728.985	729.755	806.344
M318T71			0.427869	1.32456	0.445819	318.135	70.677	7044.36	2533.53	2502.22	2558.15	9591.1	3964.11	4810.48	2568.49	11433.6	3034.75	5582.28	9914.36	2387.1	2074.96	2385.3
M263T405			0.129606	1.32443	0.15287	263.068	405.294	499.719	1044.69	845.587	821.408	1412.32	830.179	1306.49	911.895	1222.4	960.062	1853.54	968.938	296.94	316.271	289.893
M755T829			0.272175	1.32435	0.160101	754.703	828.585	1107.1	1122.58	1535.98	594.37	1188.51	1295.33	998.853	1175.83	2213.83	2030.25	1108.56	1536.35	1421.66	1423.4	1576.09
M711T46			0.0608521	1.32426	0.491948	710.774	45.771	154.688	258.322	829.49	317.659	96.7316	137.762	398.227	731.939	262.493	178.318	454.17	351.441	109.862	121.096	109.261
M258T209			0.388906	1.32421	0.422863	258.061	209.242	2383.08	6670.93	995.748	2407.03	3617.69	2113.39	3593.71	2968.48	4272.47	950.882	7213.82	5085.13	2328.7	2363.75	2382.74
M407T392			0.192105	1.324	0.0826364	406.991	392.134	573.006	479.692	736.45	539.834	889.834	530.551	923.405	1081.77	876.88	782.544	832.322	467.252	996.307	933.252	940.866
M1146T777			0.388564	1.32388	0.363741	1146.26	776.793	1004.4	2390.18	2442.02	2794.74	1883.21	3276.34	3074.25	5094.15	798.62	4212.07	1096.69	3981.68	2226.82	2342.49	2225.68
M144T890			0.292591	1.32372	0.341402	144.065	889.985	3048.33	4863.89	2892.74	935.226	3187.82	3557.92	4732.12	5827.02	7014.49	1902.09	2430.95	2563.56	2006.41	1948.24	2033.56
M797T77			0.899108	1.32351	0.489411	796.548	77.015	11713.1	9531.87	67118.5	10498.5	64842.5	19832.7	3088.07	50405.5	42556.2	41172.4	46900.4	58789.9	8055.35	9457.12	9540.13
M170T368			0.323888	1.32339	0.197135	169.833	368.482	2544.26	1044.82	1598.74	1651.92	1570.44	1442.2	2001.52	2071.35	1469.11	3688.05	1559.06	2249.5	2225.88	2229.19	2451.4
M724T305			0.539728	1.32336	0.324915	723.52	304.847	1920.93	1178.57	4724.47	6144.4	3498.18	5715.36	2933	5819.76	2824.21	5622.22	4847.51	8631.42	4644.84	4461.44	4468.15
M521T364			0.293652	1.32336	0.29335	520.505	363.856	1156.43	572.163	2743.85	2314.35	3023.97	1107.04	1714.64	1825.77	2668.45	2858.07	1656.1	3725.13	4832.59	4357.52	4348.35
M471T72			0.0790292	1.32334	0.404388	471.129	72.116	590.588	179.944	2115.26	1463.36	1470.04	1271.11	2432.32	1982.18	1975.95	70.0962	1588.56	1333.8	1419.03	1521.27	1520.17
M383T795			0.189226	1.32325	0.211676	383.067	795.065	898.931	729.991	621.339	1603.9	1679.74	804.114	1576.04	1931.68	688.947	1464.12	1544.53	1181.47	1946.28	1946.29	1820.27
M374T76			0.423508	1.3232	0.370779	374.159	75.5225	4564.99	3000.93	10199.1	2995.11	3045.99	4800.61	4744.01	4686.79	7228.98	3111.74	11415.1	6665.99	2811.53	6786.91	6812.05
M335T811_2			0.286438	1.32309	0.374562	334.652	810.637	1152.75	3405.52	1276.49	2915.91	873.995	1185.46	3562.19	2869.15	3043.66	2050.36	2354.65	422.801	2225.67	2224.14	2083.46
M698T673			0.25492	1.32294	0.172696	697.918	672.885	127.118	1521.07	994.284	1465.73	1395.8	1354	1296.85	1289.88	1463.68	1831.24	1226.86	1964.21	1433.27	1432.54	1487.86
M915T660			0.734477	1.32267	0.0904832	914.987	659.815	4085.57	5826.9	7883.5	9535.54	10154	7367.01	13035	11400	7541.09	9648.68	7433.98	10266.2	7747.45	8335.74	7689.14
M262T320			0.294771	1.32264	0.279529	262.076	320.319	307.196	1770.62	2089.03	1464.3	2397.21	1196.03	1026.25	1197.74	2322.58	2162.66	2952.43	2538.84	2896.64	2721.28	2897.5
M258T667			0.211014	1.32263	0.358307	258.108	666.9	1181.33	2210	876.653	1509.76	1583.87	1142.44	3968.05	1609.79	1086.27	1151.56	1839.63	1592.44	1663.76	1771.57	1665.64
M295T577			1.19731	1.32259	0.194632	294.902	576.615	13756	38948.8	20052.9	28193.3	24682.5	21077.1	27113.4	36873.8	50571.5	18673.5	33715.2	27091.3	20707	25458	25325.9
M305T884			0.160589	1.3225	0.193232	305.097	883.841	662.845	1042.96	771.644	397.953	491.98	976.392	596.04	619.956	1130.48	849.692	1169.3	1379.15	766.021	787.248	766.853
M281T523			0.212786	1.32202	0.218158	281.085	523.05	1526.14	718.618	917.198	795.906	1416.81	1330.94	1141.17	1306.9	1186.57	1063.13	1577.59	2589.63	1135	1145.76	1145.7
M727T625			0.19569	1.322	0.288327	726.72	625.264	295.56	1411.48	144.436	570.671	948.476	1260.81	915.539	1006.87	873.444	1050.08	948.73	1328.11	811.433	811.693	855.462
M305T72			0.491981	1.32158	0.412712	305.129	71.8645	3235.91	3057.31	2398.96	2398.21	6706.28	8968.59	6058.27	2769.94	7695.09	9399.79	1633.35	7816.02	6141.83	6174.58	6285.36
M1072T637			0.727816	1.32156	0.123086	1072.07	637.023	10210.1	5110.18	11200.2	5855.76	5918.94	6913.58	8041.18	7629.71	11286.4	9166.59	9417.48	14204.8	4008.12	4038.81	4008.26
M740T505			0.791725	1.32131	0.0367369	740.49	505.26	9638.28	7223.95	11192.9	10230.3	10879.7	10107.4	12634.3	17500.2	12901.6	13176.4	13705.1	8399.87	9998.45	9693.94	9991.86
M324T78			0.57077	1.32129	0.208033	324.261	78.371	3144.11	4772.87	5796.87	2566.66	8739.21	8197.14	6970.67	3589.39	8079.65	7576.74	8297.85	9374.76	4781.57	4903.54	4781.27
M232T637			0.341246	1.32124	0.00387337	232.073	637.313	1944.07	1813.37	1738.11	2384.96	2304.57	2367.7	2874.98	2530.41	2598.53	3376.76	2509.64	2694.95	2231.69	2353.12	2352.4
M739T307			0.693271	1.32064	0.411854	738.504	306.898	7071.53	12158.9	5323.46	3666.52	9104.74	25325.8	14454.7	8120.88	14550.4	12475.8	9550.43	23587.4	8853.38	8832.82	8091.83
M517T666			0.259341	1.32063	0.163872	517.171	666.41	1910.3	381.195	2207.45	1871	2537.41	2438.25	3274.49	1462.78	2304.5	2715.43	2587.63	2638.51	4312.08	4303.02	4444.14
M862T657			1.00816	1.32043	0.259748	862.001	656.806	24345.9	9841.49	24654.8	15289.7	32718.9	25048.9	25702	21519	16876	37957.7	48696.1	23413.1	19926.1	22819.7	20594.4
M329T771			0.165505	1.32032	0.260955	328.983	771.273	514.22	562.106	464.695	982.055	787.985	863.092	1380.58	942.446	1426.19	717.965	512.658	531.37	781.553	781.766	790.137
M1176T1049			0.159569	1.32029	0.358748	1176.37	1048.94	148.206	617.216	463.124	449.145	495.737	1124.54	517.073	1228.51	740.659	602.911	350.529	914.6	400.227	400.368	384.909
M299T77			0.602658	1.31959	0.171159	299.2	77.264	6715.47	6661.77	6197.07	1423.83	4185.45	5513.56	4207.75	5410.51	9107.31	8266.96	6827.45	6687.68	3123.59	2982.45	3123.21
M444T61			0.19058	1.31956	0.611757	443.76	60.6515	337.045	583.987	2898.36	494.948	270.746	530.939	349.029	2589.08	787.058	724.829	1169.65	1131.27	618.154	634.039	733.539
M97T317			0.185068	1.31955	0.343274	97.0276	316.929	793.502	776.226	1565.88	2516.89	1911.42	1624.4	1049.44	896.126	3168.71	1496.73	3015.91	2497.48	1593.83	1478.22	1485.45
M427T269			0.226889	1.31954	0.209124	427.258	268.504	235.371	483.774	1348.19	1105	838.924	1009.1	685.741	866.596	1268.75	1297.79	1261.65	1244.04	799.754	809.69	862.599
M328T96			0.780433	1.31949	0.376189	328.048	96.2845	12393.4	12791.8	11808.6	3150.42	15800	22171.3	16916.2	21249.4	10474.5	33224.1	12707.7	8500.37	13156.1	13592.4	13132.7
M990T681			0.883889	1.31936	0.301836	990.485	681.013	4697.49	29444.7	18128.1	10595.3	18045	7486.75	22181.9	21760.3	19333.7	22207.9	8480.93	22662.8	19142.4	19783.2	19157.3
M189T585			0.292156	1.31908	0.492993	189.069	585.205	4105.66	3165.74	445.787	1476.93	1251.91	1165.93	1357.28	5697.62	2102.59	2489.57	1431.35	2238.73	2627.38	2455.12	2628.42
M901T351			0.292822	1.319	0.452382	900.528	350.896	1385.63	586.043	1223.07	1007.92	996.917	1927.9	848.246	1034.85	732.934	2165.77	1070.71	3548.68	1265.02	1428.17	1431.33
M177T553			0.160415	1.31876	0.533388	177.134	552.521	1901.65	795.107	587.443	4915.78	1484.3	1299.33	2353.88	5463.35	1667.78	1166.58	1700.56	2132.58	2038.75	2032.95	1635.54
M694T181			0.637943	1.31828	0.473709	694.48	181.384	592.77	228.698	9660.21	14671.3	10440.5	4907.33	2847.53	9169.05	11775.2	6369.87	8872.45	14357.1	4609.41	4734.99	4731.62
M475T491			0.432876	1.31809	0.382456	475.324	491.363	2490.54	9621.23	2199.11	2546.33	3167.13	9644.13	6584.64	8543.24	6909.31	8518.94	5720.31	2829.36	3649.95	3820.97	3821.84
M164T1274			0.53637	1.31772	0.432868	164.142	1273.98	2240.09	18554	10122.6	10907.7	748.783	9606.33	14885.9	3596.36	10814.5	9754.5	10773.7	18933	16284.2	18002.8	17735.4
M529T324			0.410273	1.31769	0.135962	529.309	323.599	3393.58	2898.31	3048.19	2605.76	3254.32	3407.36	3272.58	3027.07	6863.67	3506.63	4514.45	3334.5	3828.24	4002.1	3393.85
M625T49			0.29603	1.31716	0.518526	625.408	49.216	5826.11	5570.58	8409.89	4866.58	3374.39	3659.67	2690.12	18447.4	4257.74	3299.57	6936.98	6131.59	1915.24	1918.11	1730.51
M634T66			1.45523	1.31714	0.81783	634.451	65.554	33048.9	175466	10611	4716.59	36055.4	2841.28	3832.17	5141.51	3866.78	8867.73	5877.45	318478	4002.67	3899.96	4001.02
M513T323			0.422355	1.31695	0.437049	513.136	322.752	1522.62	3907.95	4161.21	4393.44	3411.65	1620.49	4038.04	2461.95	2365.78	1615.15	5562.12	9001.89	1274.41	1413.73	1411.87
M834T351			0.446571	1.3167	0.290581	833.518	350.87	3679.06	1659.48	2256.21	5025.78	2288.75	3088.59	2265.57	3822.85	3683.63	3354.07	3353.62	7218.07	3948.69	3921.07	4249.94
M855T78			1.58114	1.31606	0.247096	854.567	77.5805	80301.7	84894.9	64478.1	32208.6	75301.2	54815.9	65680.6	73056.9	113347	59132.7	57809.3	146870	36461	37421.4	37417.3
M295T79_2			7.81336	1.31604	0.2637	295.227	79.318	1.05318e+06	885969	931485	165044	831699	2.04347e+06	1.31079e+06	1.23172e+06	1.25539e+06	1.52485e+06	934464	1.52167e+06	927606	954242	953380
M675T47			0.0978444	1.31575	0.500529	675.351	46.7395	1604.35	1497.46	375.637	1309.29	1222.7	667.076	1097.32	1550.97	3684.8	826.688	625.651	999.206	1792.06	2072.62	1822.34
M701T481			0.309012	1.31571	0.406672	701.492	481.482	6215.59	10310.8	5945.3	2721.21	7905.07	3301.21	9956.59	2815.98	5856.96	5090.5	15910.3	8260.67	19191.2	19128.2	22033
M393T699			0.235099	1.31569	0.300353	392.936	699.004	890.736	1510.11	1498.41	1010.29	1581.98	1178.58	1608.29	732.282	3268.18	1464.72	1245.53	1772.46	1339.58	1466.62	1350.45
M661T47			0.218133	1.31562	0.0294302	661.334	47.331	892.676	950.969	768.306	1048.9	1095.82	883.676	1296.46	1616.39	905.527	1382.31	1227.94	991.899	736.392	785.366	750.18
M281T766			0.23633	1.31539	0.404751	280.975	766.148	902.076	2007.89	1585.89	523.187	774.017	789.44	987.323	1570.92	908.99	1319.97	910.583	2960.76	640.72	569.297	640.238
M553T625			0.334667	1.31522	0.197304	552.808	624.523	2682.05	1663.68	3153.01	2230.07	5999.54	3152.15	4307.02	5767.61	3450.45	3317.05	3673.48	4316.36	2694.74	2695.81	2733.18
M189T443			1.47444	1.3152	0.221908	189.04	442.87	26184.9	58171.4	22359.2	24355.5	26240.5	24346.7	40740.6	30614.5	51012	33606.3	27133	55810.2	21314.3	21508.2	21798
M163T1371			0.732029	1.31493	0.402839	163.008	1370.66	10794.9	11989.1	14896.3	12637.1	12651.2	11897.4	13506.2	7170.67	12211.7	38115	14321.9	13118.2	13110.8	12790.9	13111.7
M111T60			0.293143	1.31487	0.446316	111.091	60.0295	1420.48	4400.01	2470.81	2166.31	3350.13	1029.61	2270.47	1978.06	4504.15	2243.75	1612.08	6900.75	2364.78	2264.2	2269.82
M418T543			0.252579	1.31483	0.281805	417.999	542.908	1430.62	257.572	1112.86	1129.06	2474.3	1471.29	2594.78	1951.88	1097.36	1838.19	1403.28	1469.71	1267.74	1409.33	1270.45
M915T675			0.410709	1.31477	0.139834	914.903	674.505	1143.66	3111.78	2373.82	3402.79	3762.31	5328.11	4219.7	4592.97	4133	4982.42	3127.62	4086.02	5880.6	5877.23	5630.16
M281T72_3			15.7011	1.31469	0.048443	281.248	72.175	1.96334e+06	3.34468e+06	3.95014e+06	2.19062e+06	3.73748e+06	4.07628e+06	4.23888e+06	4.10777e+06	4.41814e+06	5.05755e+06	3.16605e+06	4.3359e+06	4.04956e+06	4.05822e+06	4.19054e+06
M593T771			0.170903	1.3143	0.242272	593.068	770.562	641.146	855.375	876.015	483.329	668.438	1119.53	1447.46	1334.47	1223.43	1088	649.271	360.783	474.507	484.16	484.341
M514T471			0.509966	1.314	0.268583	514.323	470.986	1840.94	5418.92	6125.63	4641.27	4819.05	9961.76	3813.53	6667.74	11147.5	8360.44	6729.83	6390.07	7408.85	7657.61	7840.91
M158T589			0.259549	1.31382	0.37755	158.068	589.232	609.87	2803.37	1048.23	1004.86	792.213	3278.81	1262.04	3159.4	2151.4	2354.64	1548.01	2054.87	3334.09	3048.76	3044.68
M235T707			0.265102	1.31379	0.120086	234.998	707.235	721.575	1280.81	788.391	652.44	1237.09	920.278	996.032	1525.44	1471.94	1152.88	721.132	1490.58	1075.47	806.848	1050.77
M434T543			0.427075	1.31361	0.14831	433.973	542.882	2251.99	2152.39	2892	3691.63	4321.64	1306.82	4208.65	3566.06	3014.88	4949.85	2960.58	3127.5	4174.61	4063.91	4175.55
M758T308_2			0.333145	1.31339	0.35843	758.455	308.138	2220.7	4524.3	1529.22	343.672	2517.55	3370.27	3748.37	4486.69	4428.37	2874.87	1329.48	2183.82	2669.51	2461.59	2678.88
M347T797			0.26828	1.31325	0.413033	346.99	796.716	1169.96	1993.2	1040.74	850.335	829.482	357.243	1064.67	1170.89	769.288	2467.8	588.681	2134.58	709.39	710.049	688.152
M161T764			0.130754	1.31306	0.345133	160.631	763.697	1935.06	851.613	1154.77	765.976	815.252	420.895	512.483	1672.37	1202.83	1133.16	2173.24	1110.17	1017.97	992.212	991.744
M358T76			0.575993	1.31305	0.517961	358.367	75.96	8364.44	6917.68	15627.6	44052.2	6981.36	15692.3	6868.63	42527.1	15844.3	17604.6	25741.7	19614	17855	17878.9	18525.6
M372T48			0.235414	1.313	0.250641	372.101	48.0505	3288.26	3142.57	1505.02	3670.08	1254.33	5530.41	4599.94	4672.51	4189.02	2790.44	5369.02	2525.94	8406.7	8408.61	8650.32
M471T877			0.231574	1.31286	0.197971	471.04	876.846	574.958	877.704	1044.41	740.398	1017.61	518.925	1167.47	1380.04	318.178	1319.42	1024.42	1058.05	1024.53	944.938	945.111
M383T66			0.369319	1.31256	0.253555	383.294	65.9935	3254.78	2700.92	2762.59	1403.07	2310.15	2754.6	2278.67	2009.74	5855	3866.34	2243.2	3679.79	2399.57	2401.09	2453.32
M337T98			0.311321	1.31245	0.553868	336.976	97.975	6430.46	4204.65	2929.69	3701.14	1734.27	3798.29	13453.9	6124.42	3638.52	3028.1	2869.04	807.822	3169.05	3922.63	5071.09
M845T47			0.212159	1.31208	0.407719	844.735	47.2065	2030.19	1572.15	473.662	578.396	1365.36	979.735	1026.8	709.31	621.815	2053.47	2283.41	2489.08	2433.13	2102.5	2429.75
M224T70_2			0.344367	1.31188	0.341733	224.164	69.7785	1140.52	2431.2	2038.56	1467.31	1393.69	3247.17	2581.52	3324.09	781.307	2480.34	1741.39	4464.5	2154.85	2212.5	2300.52
M573T830			0.371906	1.31122	0.153503	572.786	830.306	1818.93	2590.81	1316.04	1394.67	3536.04	1930.42	3392.44	2885.89	2991.17	2087.26	1922.94	3224.49	2763.2	2779.35	2885.66
M879T641			4.42047	1.31104	0.459319	879.044	640.846	127828	359257	399591	1.01055e+06	317438	357232	357131	497714	889220	973740	240462	413597	449943	435303	463065
M259T772_8			0.26518	1.31085	0.47638	259.373	771.823	2647.8	7055.38	1913.08	1335.46	3347.32	1715.45	1545.25	5412.26	4913.93	4819.37	6233.15	690.384	4157.82	4109.66	3428.32
M255T80			0.292384	1.31085	0.320308	255.249	80.415	2948.69	2983.87	7412.84	5092.92	9007.18	6464.33	9236.04	6952.64	12146.4	8071.04	5687.43	2357.06	5289.18	4806.63	5308.28
M202T597			0.272275	1.31069	0.314408	202.179	597.33	588.173	525.429	1414.48	2123.72	1894.08	2331.48	1058.18	2277.11	2122.41	1367	1718.93	3091.79	1796.27	1636.23	1804.04
M655T34			0.204426	1.31068	0.0683041	655.209	34.114	958.058	1360.81	1758.88	690.659	1077.02	1271.39	1211.42	1440.55	1750.69	1479.67	1909.06	1536.47	1596.98	1598.7	1696.81
M312T79_2			0.241455	1.31057	0.358219	312.258	78.9845	414.422	1993.95	1753.73	1205.44	2033.27	3697.18	2780.68	2409.31	4083.96	2324.6	1574.47	1371.74	1733.39	1691.7	1692.38
M359T726			0.567831	1.31027	0.268577	359.118	726.468	5704.09	7538.8	2977.3	2039.4	3941.29	4438.03	4178.07	7898.82	5916.49	4859.39	3370.55	8680.92	3637.01	3634.81	3409.81
M508T50_2			0.457827	1.31013	0.216612	508.402	50.447	4360.38	7027.37	3701.92	2518.58	1730.48	2548.02	3878.39	4858.64	4401.29	5206.31	4038.09	6291.87	3566.97	3640.68	3642.11
M168T366			0.347583	1.31009	0.118753	167.836	366.485	2413.43	1663.66	1588.58	1305.74	1848.39	2134.8	2940.49	2413.93	2532.97	1650.76	1501.92	3311.47	1379.48	1380.89	814.296
M105T712			4.15406	1.30994	0.11573	104.991	712.265	458278	408367	472535	485382	159915	253529	424241	478792	478671	494690	391616	663636	389735	388528	389737
M291T440			0.292005	1.30972	0.448034	291.155	439.801	3155.3	255.863	6197.53	1212.58	5425.27	3841.18	4185.38	1830.89	7850.65	2704.76	6098.92	3638.77	973.738	1066.16	1026.36
M440T68			0.352551	1.30967	0.281333	440.192	67.53	2812.76	2997.29	1806.6	2083.35	4238.78	2126.86	1301.17	3983.17	1959.89	4424.28	4044.29	5327.94	3171.44	3131.32	3197.96
M523T484			0.225238	1.30956	0.382342	523.283	483.995	1648	1470.14	1048.73	176.765	843.648	537.902	1010.13	641.697	1378.39	1921.91	684.54	1860.79	575.56	532.105	573.51
M208T54			0.592788	1.30945	0.289223	208.169	53.557	11563	10955.3	9945.91	8732.99	13779.2	8625.04	8372.46	13147.2	8262.97	24754.3	19737.9	9007.7	13654	13692	12964.7
M111T285			1.11767	1.3094	0.104939	111.02	284.846	28532.8	16469.3	22877.1	17823.1	25063.5	31906	32282.4	21420	44660.4	26213.7	34859.1	27378.3	19590.8	19960	19589.4
M351T39			0.258235	1.30939	0.722726	351.016	38.734	15514.2	7618.58	2956.49	1609.35	4448.96	700.519	4066.1	4684.76	27202.9	789.953	1526.76	4740.34	488.643	487.584	524.924
M841T252			0.782139	1.30938	0.490651	840.574	252.24	14513.9	7624.6	8006.98	3549.92	4563.86	21226.8	3491.01	10054.3	8114.85	16531.5	12960.9	26737.4	10357.4	10510.6	10357.6
M805T79_1			1.95353	1.30936	0.0549543	804.552	79.034	77823.9	75624.2	71762.2	52666.7	75769.8	58321	70555.4	113154	94001.3	78651.4	66532.3	116521	51669.9	51673.9	52222.1
M793T211			0.834693	1.30915	0.513328	792.552	210.939	3389.77	1594.9	34549.8	26601.2	12514.7	11036.9	8837.49	15186.2	14638.6	39136.1	20007.9	19608.2	27359.2	27476.2	34118.4
M305T643			0.230527	1.30874	0.313168	305.093	642.92	2527.78	4438.94	2450.82	1814.65	1509.6	1983.43	1568.87	3079.61	3055.06	1887.14	4853.68	4827.09	1663.21	1627.44	1653.37
M270T201			0.297348	1.30871	0.319911	270.207	201.029	1560.76	1345.41	1429.72	3143.25	2269.64	1092.96	1451.78	2764.26	1841.11	3665.87	3373.28	1092.37	1185.87	1262.07	1189.08
M937T657			0.812811	1.30864	0.271443	936.993	656.75	12272.9	19839.8	9116.08	6044.86	13162.2	10333.1	12692.4	15334.3	26620.1	16985.6	10863.5	10115.4	12630.2	12037.4	12051.9
M747T82_2			0.667029	1.30864	0.228866	746.598	81.903	9007.99	11570	13092.1	7740.2	6038.83	15191.7	12009.7	9900.23	12593.6	23664.8	13597.8	10208.2	13640.9	11372.2	13677.2
M464T546			0.434177	1.30853	0.402657	464.106	546.26	2316.07	2127.01	1701.82	4364.2	2317.97	6901.93	4412.5	6921.2	2565.95	3189.82	2203.63	6522.89	3353.74	3373.72	3668.67
M473T713			1.02394	1.30831	0.466778	472.996	713.413	21143.2	13421.6	11440.9	17246.3	54400.2	16402	16935	24701	20657.3	58085.2	19935.7	35070.1	17170.7	17186.1	15788.9
M556T287			0.313261	1.30801	0.44713	556.272	287.167	4508.48	689.45	1671.77	761.496	2489.05	1131.4	1170.83	2132.96	4011.39	2002.08	2017.37	3382.61	710.637	1581.28	1570.59
M173T1374			0.505996	1.3079	0.341089	172.958	1373.77	3562.65	4420.79	3062.23	3447.39	7005.63	3199.66	5552.67	3348.04	4135.68	4195.66	4319.49	10751.4	4485.47	4379.79	4873.64
M480T845			0.295752	1.30783	0.135614	479.868	844.917	1190.95	1765.03	1012.1	613.314	761.292	988.663	1550.43	1388.87	1054.54	1403.43	1089.36	1793.71	1207.32	1216.23	1275.52
M801T421			0.176693	1.30783	0.408629	801.069	420.925	1158.47	106.268	2070.75	510.188	1405.7	2304.08	2398.01	1949.34	1225.28	1471.75	2260.7	576.136	1663.74	1663.27	1620.8
M163T363			0.370251	1.30769	0.4957	163.039	363.481	2921.39	3053.59	2329.04	5656.73	1933.67	864.612	7433.78	2820.92	1283.48	5126.49	824.696	4426.18	4288.72	4260.83	3134.14
M301T70			0.219313	1.30686	0.440005	301.084	70.364	3475.52	1801.86	1328.29	1828.75	1607.29	1611.25	5336.98	1614.48	3716.05	1252.7	1975.71	1332.89	1369.33	1678.38	1477.68
M536T84			0.634117	1.30607	0.13229	536.164	84.054	16864.1	15215.5	15842.9	14055.6	15194.9	17135.3	27261.6	14418.6	31538.6	16088.3	18036	15829.9	18472.8	16202.9	16551.8
M320T53			0.282899	1.30596	0.0547219	319.989	52.716	1478.12	1361.69	585.452	961.86	785.508	1273.84	1223.72	1388.48	1485.33	1558.08	1361.84	1401.36	1058.66	973.981	973.599
M446T77			0.413103	1.30561	0.215145	445.702	76.713	132.947	4134.34	3419.13	2575.99	2584.57	2712.88	2882.29	4443.34	3404.48	3087.27	2989.24	3508.49	2086.9	2086.69	2147.21
M308T483			0.335499	1.30556	0.389947	308.134	482.575	2266.18	3148.22	1136.96	1593.16	1419.62	764.201	686.587	2448.15	2051.07	1857.23	2216.29	4224.92	989.689	977.924	870.562
M846T301			0.522461	1.30552	0.329319	845.605	300.553	1678.22	4174.64	2925.88	4090.51	9981.8	9925.65	5843.87	9171.3	5794.66	7129.78	5547.64	9303.51	9745.8	8922.61	8359.88
M843T255			0.522829	1.30552	0.430322	842.585	254.714	5980.15	2986.22	3537.49	3170.19	3082.3	10101.4	2587.2	3592.89	5569	7417.27	6463.68	12044.4	4161.19	4563.49	4561.28
M885T682			0.705979	1.30521	0.116368	885.022	681.591	5478.97	11092.6	7304.33	13412.4	10050.6	9478.87	10162.4	10624.2	14494.6	15656.5	8347.88	14873.6	9036.69	8907.88	9039.73
M291T636			1.89237	1.30514	0.170676	291.007	636.414	58057.2	56112.6	74010	76890.3	76194.2	45436.1	64440.6	90539.5	142176	69408.6	69123.2	69010.5	105094	80551.4	79324
M826T289			1.20639	1.30499	0.659138	825.581	289.185	3613	5444.17	13267.4	12584.8	24919	86351.9	21525.3	40169.3	18247.6	16338.2	15238.9	79244.8	19240.5	18287.9	18275.9
M530T328			1.42448	1.3049	0.301237	530.286	328.172	16397.5	11469.8	51869.2	38095.2	37317.9	72402.6	48096.9	47801.2	49027.6	67054.3	28037.5	56916.2	30046.1	30056.1	32891.6
M494T328			0.577402	1.30481	0.137809	494.241	328.152	2964.76	2575.89	4524.61	8253.03	5321.51	5508.32	7221.7	5577.9	6528.35	4880.27	7044.23	6780.35	6392.96	6690.1	6684.56
M1012T621_1			0.273741	1.30464	0.0300393	1011.68	620.945	2187.17	1705.46	2238.65	1810.97	2389.23	2657.57	2764.26	3353.46	3431.65	2053.54	2911.65	2431.5	1224.55	1161.63	1162.32
M475T831			0.559984	1.30461	0.116576	474.811	830.879	5429.48	4617.22	6315.4	2126.97	3628.6	6220.83	7055.79	6334.58	7608.94	5300.41	4155.52	6515.4	6054.58	6069.78	6639.02
M737T83			0.332368	1.30383	0.361565	737.493	82.839	774.466	2647.66	1234.06	1332.23	900.629	2591.42	919.334	2076.94	1404.94	3063.13	1716.49	3180.09	2129.7	1842.25	1834.48
M275T717			0.329232	1.3036	0.385916	274.99	716.503	520.999	2800.76	1623.49	1628.81	1758.66	2003.26	1080.97	1578.46	3217.79	3137.17	863.094	3596.56	2137.5	2164.7	2401.34
M423T800			0.21806	1.30329	0.244054	423.005	800.267	323.681	1140.32	977.781	614.815	1222.48	1449.4	745.513	872.025	1591.48	1150.33	1738.9	1367.62	1087.72	1086.79	986.091
M360T58_1			0.804567	1.30309	0.28094	360.22	58.039	14257	13780.9	9179.36	2338.53	5651.43	10244.2	6668.88	9210.79	11710.6	14561	12562.9	17544.1	7303.87	7303.22	7208.14
M281T77			0.424331	1.30307	0.380493	281.14	76.676	3679.33	5817.57	3389.84	2564.55	1831.64	7189.17	8127.39	7000	701.482	6284.8	5360.03	4415.25	3964.17	4036.38	4798.96
M562T486			0.106951	1.30294	0.272339	562.246	485.617	940.045	818.462	867.069	519.841	527.246	550.634	852.604	629.945	1692.24	546.14	879.493	902.289	752.624	752.776	727.432
M805T302_1			1.41021	1.30269	0.126051	804.552	301.538	58284.3	84016	57576.8	38434.3	49913.6	48131.8	61994.5	95662.8	73738.2	40465.2	82657.7	83650.7	53819.1	53785.8	56898
M228T714			0.469011	1.30263	0.320493	228.064	713.705	3482.27	8256.97	7507.22	3837.59	12867.7	12655.2	15453.4	9388.59	12274.2	10357.9	12363.2	3479.58	11054.5	11086.9	11413.1
M198T831			0.335518	1.30263	0.0911884	197.894	830.611	1329.15	900.13	1616.81	2137.13	2526.36	2384.93	2984.94	2194.72	2122.82	2446.24	2337.6	2105.18	1811.74	1866.8	1489.78
M405T837			0.295001	1.30255	0.501649	404.996	837.037	730.696	1411.35	1030.79	4306.88	953.169	1242.89	2854	3663.38	761.305	2300.16	1216.86	1807.5	1520.34	1560.48	1559.94
M821T726			0.261223	1.30245	0.318558	821.42	725.571	1323.69	907.687	1880.32	764.5	2343.02	2586.27	3440.79	1816.43	1058.76	1899.06	1669.66	2886.45	3623.89	3633.08	3499.93
M413T317			0.202147	1.30235	0.222328	413.022	317.009	1249.67	2617.77	2156.66	567.818	1857.94	1624.29	2322.13	1385.31	2358.24	1851.51	3255.43	1947.4	1057.12	1071.55	1200.97
M717T77			0.35016	1.30214	0.188767	716.522	77.346	5016.02	2962.63	2865.54	2192.41	2938.32	2234.23	2066.25	3601.29	4817.07	4244.66	3425.88	5555.68	3743.21	3743.48	3893.59
M456T73			0.397196	1.30207	0.249175	456.221	73.48	3591.61	4264.17	2688.3	609.02	2178.87	2533.74	4600.3	2198.81	3034.77	4437.54	2592.14	3794.66	2359.23	1907.94	2364.57
M650T301			0.627866	1.30204	0.224313	649.516	300.98	22283.5	25991	15409.8	15417.7	20523.1	8881.64	30572.5	15661.5	31721.9	13687.4	30717.5	18919.1	17158.1	17237.8	18692.3
M572T323			0.646103	1.302	0.57754	572.333	322.562	2468.95	1374.67	27009.8	8465.02	29318.9	67818.4	51935.2	25830.8	42697.6	16808.3	13867	26526.8	9449.48	9445.1	9288.18
M572T840			0.333412	1.30185	0.189624	572.233	839.701	1497.13	1893.38	1613.97	2186.12	1903.31	3027.02	2179.23	4108.62	1720.73	2582.6	1923	3265.49	2542.86	2579.31	2579.53
M720T251			0.458072	1.3017	0.225235	720.494	251.345	4494.08	3026.87	2831.23	2639.24	2380.3	2902.83	2300.25	3733.36	2471.69	6038.8	3580.02	5663.93	3622.62	3732.14	3571.39
M428T330			1.04987	1.30152	0.59759	428.372	330.154	58793	197429	101206	21900	112060	75233.4	121237	108538	344449	74042.8	48904.2	40298.7	78978.4	87241.3	78938.8
M547T49_2			0.728929	1.30143	0.172316	547.47	48.598	10551.4	12261.1	5433.04	7879.64	9162.91	9274.29	8052.09	11638.2	9018.62	18654.4	9765.62	13880.5	11357.6	11357.7	11451.6
M713T51			0.386503	1.30113	0.313334	713.497	51.036	2438.99	8164.25	3201.05	1653.82	6007.05	1961.49	4778.56	6393.18	5157.73	4131.59	5083.75	4936.38	3564.49	3526.95	3564.93
M138T505			0.356839	1.30107	0.312619	138.041	505.103	3919.75	1229.8	1702.37	1053.54	2273.15	2373.33	1248.72	3247.22	1946.72	3997.01	2542.3	3348.99	1240.16	1476.65	1472.45
M241T79			0.768127	1.30099	0.131424	241.18	78.662	6292.15	8600.63	12083.1	4417.82	11661.2	13035.4	13461.2	14732.1	13851.4	11324.2	8323.13	11280.9	10490.4	10812.6	10616.9
M499T337			0.254626	1.30092	0.356174	498.675	337.052	243.093	139.279	2326.84	1646.18	2597.09	1740.06	2098.54	2117.09	2328.59	1293.49	1634.48	1836.14	909.138	1245.34	1228.98
M705T676			0.295688	1.30054	0.362837	704.916	676.279	304.49	635.264	2059.38	1739.51	3610.52	2871.12	3107.1	2814.16	2813.88	2603.16	1245.49	2008.66	3837.88	4572.39	4560.19
M186T605			0.190953	1.30008	0.109007	185.959	604.661	1473.76	679.631	1506.83	1057.43	2043.1	1838.85	2041.95	1603.17	1872.32	1464.27	2390.6	1807.82	2402.68	2406.6	2406.6
M308T478			0.280818	1.30002	0.426786	308.098	477.727	1358.56	1628.57	1445.29	1511	614.963	1093.21	893.961	1681.1	843.755	1201.11	1606.35	3720.95	913.44	998.187	913.781
M385T385			0.223658	1.29979	0.360416	384.986	384.849	734.184	1134.11	1126.18	968.255	525.613	592.638	854.178	1090.5	1219.11	614.666	624.592	2201.15	823.133	637.62	823.981
M361T830			0.167314	1.2997	0.313943	360.874	830.489	561.126	327.645	618.325	850.982	1640.2	896.909	1424.29	1090.4	1414.17	931.993	973.297	528.146	629.536	726.955	628.213
M204T666			2.22421	1.29936	0.477268	204.122	666.362	225811	87980.3	216647	155232	194798	107327	160560	416819	111708	377592	190685	26136	87795.3	87793.9	90715.1
M1113T713			0.688572	1.29933	0.170191	1113.49	712.689	5547.58	13105.8	9778.22	9056.56	14627.6	11963.5	10556.9	9559.8	19022.9	18215.7	10632.7	15272	10515.7	10407.8	10527.3
M610T628			0.262021	1.29928	0.00243453	609.977	628.365	839.302	732.047	934.574	657.261	986.134	878.598	1082.48	1108.29	1160.49	1035.43	948.528	1197.47	787.141	642.974	646.227
M84T604			0.0943556	1.29925	0.179591	84.0434	604.272	470.611	596.525	840.299	365.486	351.506	528.239	647.547	577.263	887.903	507.552	963.646	512.183	312.256	331.488	317.977
M791T181			1.86106	1.29921	0.564344	790.573	180.571	80983.7	145410	2.04644e+06	1.12804e+06	1.48236e+06	259973	1.41547e+06	1.824e+06	542098	819949	1.81167e+06	268939	1.24637e+06	1.22399e+06	1.24649e+06
M717T626			0.45817	1.29856	0.708522	716.993	625.813	3248.37	2823.02	6294.59	1067.59	8771.48	1001.89	5404.27	1738.78	1712.37	590.589	2449.03	18240.6	516.213	477.339	478.717
M708T75			0.240968	1.29834	0.0456862	708.423	74.5485	1418.15	1653.17	1134.35	1165.6	1109.72	1056.41	1577.28	1505.56	1697.1	1227.02	1556.77	2222.43	1239.65	1237.22	1298.87
M1173T636			1.07	1.29833	0.0696609	1172.98	636.379	12096.4	12562.4	20827.6	19181.2	19168.6	8294.72	21314	20654.8	18775.2	19325.7	16533.1	23013.7	15116.2	17292.5	17458.7
M359T895			0.390679	1.29832	0.0364405	358.875	895.325	1784.79	2886.19	2532.22	2079.12	2716.87	2783.53	2846.53	3850.69	2558.82	3907.1	2630.78	3398.81	2283.99	2485.86	2479.81
M492T360			0.290885	1.29806	0.48256	492.475	360.491	449.372	1208.33	3713.17	5904.47	4970.64	3217.91	3250.49	5137.59	7414.67	6223.82	922.368	2316.4	5001.22	4738.5	5000.72
M865T84_1			0.240773	1.29787	0.430693	864.507	83.728	2298.14	1549.95	1759.36	598.83	56.1721	1646.92	928.436	2386.1	886.856	2309.33	2674.73	1079.86	1788.63	1382	1606.13
M201T727			0.403466	1.29778	0.0348092	201.038	727.235	2029.63	2169.74	2724.76	1892.82	2170.86	2180.45	2363.67	2768.3	3680.48	2383.49	2407.77	3485.82	1573.3	1694.08	1693.6
M353T376			0.476514	1.2975	0.519356	353.231	375.695	6590	3347.19	9250.16	5094.55	2957.63	10789.2	6132.59	4287.53	4488.29	4342.71	10201.7	19889.6	3635.36	3635.38	3601.51
M298T711			0.293817	1.29746	0.494039	298.033	711.455	4353.31	2074.7	2585.67	1894.34	5497.68	3854.5	9242.01	1770.12	2200.26	2471.25	7461.53	3141.67	7241.52	7672.61	7239.31
M329T206			1.73097	1.29724	0.298472	329.232	205.974	93342.2	61348.3	53724.7	17070.3	52234.6	69548.4	53951.6	119148	50636.3	83842.8	95673.6	47239.5	57426	63963.4	57161.4
M368T306			0.197355	1.2971	0.55734	368.35	306.376	5696.84	3133.53	3598.81	937.808	2446.15	1321.92	2552.44	2299.84	8914.52	1995.88	5455.4	1007.71	1446.18	1489.24	1443.19
M201T730			0.317031	1.29702	0.580561	201.071	729.633	584.931	880.061	2349.76	6352.87	1807.11	6431.55	6596.09	6373.65	1395.02	828.988	1914.18	6765.29	1195.76	1066.4	1056.38
M381T824			0.480232	1.29692	0.73188	381.079	823.776	4088.15	2023.12	2180.49	7972.52	5898.74	2113.09	3169.67	2532.6	1596.97	1535.77	1178.07	21471.1	3332.47	3333.11	3537.18
M613T49_2			1.223	1.29662	0.339454	613.482	48.625	29836.8	49393.2	15284.7	10433.8	18596.3	19497.7	25521.8	32416.9	16969.4	45628.1	27199.7	37735.3	28138.1	28689.2	28140.1
M135T366			1.9043	1.29652	0.20565	134.894	365.956	16572.1	29277.5	67738.7	88760.2	77018.3	85885.9	87835	76040	62985.9	90511.8	87715.4	68469.4	93444.4	89587.3	89588.6
M502T693			0.314812	1.2964	0.239812	501.987	692.65	2571.71	4698.95	5681.52	2353.5	3168.11	4345.9	4174.32	6140.58	3550.77	2473.79	6447.18	6796.86	4714.93	3243.68	4262.81
M952T52_3			0.0990575	1.29589	0.555516	952.129	51.745	956.394	830.189	3263.84	588.283	202.651	1080.7	955.334	2547.86	775.109	900.647	2595.19	1196.05	1005.37	1026.6	1026.4
M509T745			0.237517	1.29586	0.176691	508.932	744.701	1553.95	1222.27	2696.69	1222.71	1594.18	1619.68	2410.17	3109.35	1541.77	1432.56	2028.66	2318.76	1693.09	1857.03	1851.95
M316T70_2			0.302777	1.29573	0.565373	316.158	69.9485	10684	3182.28	1223.99	892.381	1687.62	2888.05	2068.64	5816.87	6404.77	3829.87	6260.48	2257.39	2527.83	1304.59	2552.73
M758T75			0.34221	1.2957	0.313235	758.472	74.692	5245.19	4617	1631.41	2562.71	1893.65	1190.84	4276.88	4009.15	4111.11	2244.73	2744.24	4823.29	2511.44	2529.76	2694.25
M882T345			0.781626	1.29555	0.237887	881.517	344.845	9454.48	4649.25	9994.23	10446	10576.1	12484.7	6410.61	10737.2	7573.05	15809.4	16100.8	17998.8	14336.8	13041.3	13038.3
M623T330			0.791047	1.2955	0.48471	623.402	330.239	22757.7	9240.83	14720.1	8174.85	15983.6	18503.3	43945.7	12513.8	11020.6	27509.7	9159.23	11642.8	17094.1	17275.6	17276.1
M251T674			0.574696	1.29545	0.0437557	250.948	673.503	5177.39	7889.36	8584.92	6895.44	11114.3	8803.45	10585.7	11251.7	13130.6	9255.17	8924.09	9636.77	10585	11226.7	11239.7
M139T183			0.253634	1.29543	0.576488	139.04	183.002	664.057	562.274	453.524	3711.02	1189.86	3389.79	569.981	3655.93	973.666	3026.84	3691.6	998.052	2670.74	2669.18	2808.96
M383T796			0.182634	1.29536	0.241717	382.958	795.663	654.524	979.297	439.447	594.248	562.139	675.098	378.455	798.242	1180.8	731.007	1273.61	695.94	617.537	440.09	618.044
M409T59			0.472459	1.2953	0.460873	409.161	59.476	10276.2	12144.9	34141.5	5465.04	9718.06	15500.1	12519.8	34260.1	11771.3	11265.2	25177.4	18016.1	9841.51	10083.2	9838.82
M474T328			0.335458	1.29507	0.573326	474.356	327.519	38028.5	5253.8	29895.5	13244.3	25392.9	17806.6	29655.3	15712.8	68110	7237.35	41734.1	5419.89	15048.5	15060.9	14112.2
M315T855			0.126598	1.29463	0.190602	314.951	854.972	579.776	824.918	692.478	720.678	774.429	719.85	482.213	625.522	1454.61	806.8	1137.47	1075.98	602.442	655.149	655.877
M496T867			0.228351	1.29453	0.571504	496.338	866.902	1699.83	2464.83	3989.13	988.613	588.974	605.462	2067.06	965.636	785.179	5017.54	3350.53	1195.39	975.225	1188.86	976.01
M276T551			0.436787	1.29451	0.0938698	276.18	551.423	5161.99	4556.37	3736.68	2558.23	2602.64	4519.3	4654.03	4495.11	6737.8	5428.8	3656.17	4976.85	2816.49	2816.93	2727.6
M391T51			0.17441	1.29447	0.57189	391.246	51.003	2594.39	2173.01	1908.11	7266.65	1796.45	3010.25	3217.1	1359.79	10187.2	1752.85	2917.18	4835.8	2066.88	2383.08	3168.43
M295T307			0.626008	1.29422	0.405221	295.034	306.693	9848.35	17791.7	13627	6210.03	1625.8	10777.3	13678	11810.3	24504.7	8798.82	10951.6	7755	11253.8	14126.9	11296.3
M504T388			0.627293	1.29421	0.41617	504.342	388.248	11284.2	9326.82	19470	11843.7	22265.5	8625.44	9935.32	35617.7	12892.3	24723.6	14059.5	9952.4	10732	8584.39	9542.73
M365T953			0.356086	1.2939	0.123513	365.052	953.013	3276.61	1919.08	2157.94	1550.11	1110.42	2407.82	2522.82	2018.93	3361.24	2552.6	3091.47	2525.76	3576.59	3390.49	3215.62
M725T1203			0.533625	1.29366	0.0489009	724.568	1203.33	7984.43	7077.09	7878.39	5748.61	4745	4091.34	9925.75	8369.81	7280.41	7703.39	8621.02	6644.18	8015.45	8005.82	7594.22
M640T733			0.243508	1.29352	0.265758	639.872	732.824	662.976	429.227	1116.08	1675.52	1494.85	1276.44	1089.88	2010.05	1129.31	1822.47	838.546	1718.25	2159.87	2189.88	2071.6
M225T78			0.919525	1.29351	0.69161	225.148	77.7165	363.513	1323.53	66030.5	72807.3	2124.74	70047.7	103549	1210.03	96701.7	1906.46	1208.46	70550.9	49884.1	50037.3	56453.4
M600T389			0.244017	1.29349	0.304804	600.329	388.649	7244.44	5913.28	5878.45	2885.16	10251.6	5566.16	8452.94	4468.62	12350.6	4082.28	11391.3	8069.31	2515.96	2268.04	2506.42
M287T861			0.56939	1.2934	0.111038	287.04	861.295	6232	5730.35	5319.87	5317.57	4811.78	9478.19	8958.4	6592.71	6771.44	5918.69	10911.3	8560.58	7258.59	7270.36	6841.26
M715T287			0.364031	1.29307	0.437523	714.542	286.714	526.748	2799.12	3822.55	4054.43	5084.7	5063.58	4976.09	3264.22	6744.83	2131.27	1947.42	8544.62	3835.14	3750.35	3817.49
M356T75			0.363069	1.29293	0.270432	356.314	75.3515	3048.77	3522.68	3356.8	2003.74	3076.91	3201.43	4493.68	2026.16	1994.06	3836.81	4428.19	6765.7	2066.15	2084.05	2150.81
M511T75			0.566256	1.2929	0.28321	511.471	74.69	4197.58	2667.63	10909.9	5240.78	4117.79	9141.82	3781.31	9377.74	8177.88	8992.05	8412.53	8158.93	7501.98	7491.46	7845.28
M909T678			0.255404	1.29265	0.361645	908.916	678.444	929.221	1326.28	1314.18	1387.58	2371.49	1649.71	2187.08	1284.93	1241.14	3871.85	1636.56	1384.46	2365.36	2533.21	2529.25
M683T496			0.0909561	1.29237	0.345507	683.251	496.176	343.739	903.323	1799.38	1143.88	545.113	971.439	1776.52	1098.1	1705.18	711.047	1352.21	732.342	1094.75	1074.25	1023.35
M384T660			0.229582	1.29233	0.29229	384.107	659.857	383.908	498.438	642.605	1204.19	1451.82	1549.7	1307.5	1267.31	804.861	1740.42	884.14	1401.66	1718.76	1717.64	1750.69
M453T76			0.190994	1.2923	0.449702	453.367	76.203	6061.33	2452.52	3076.12	5652.11	2031.48	2018.44	2199.06	6708.98	2588.23	4925	8644.76	2449.59	2604.4	2808.89	2605.44
M681T462			1.24972	1.29206	0.467149	680.513	462.12	17102.9	14555	57938.2	28907.8	15039.5	55770.2	46207.6	15002	17371.3	68554.2	37358.3	60111.7	25598.8	23006.8	23108.9
M355T78			0.811431	1.29189	0.211134	355.203	78.029	6214.35	7558.59	18538.1	7172.16	10100.6	19905.7	15420.5	13739.1	16252.3	14027.1	13858.4	16475.6	11822.2	10415.1	11849
M1021T727			0.341337	1.2918	0.340439	1020.87	727.321	921.069	1113.77	2910.51	4318.12	2969.87	2474.86	1642.47	3872.37	2923.16	5013.49	2215.27	3333.33	4750.99	4434.06	4748.37
M358T846			0.41586	1.2917	0.283806	357.946	846.135	1789.92	3145.1	4471.47	1475.16	3073.59	3802.72	4853.27	5743.97	3036.58	2277.82	2316.17	4710.14	1937.73	2250.01	1960.1
M529T731_1			0.405958	1.29135	0.454439	529.157	730.808	2638.71	1410.32	2196.79	1996.72	2661.84	5183.34	3130.43	2625.91	2619.19	2622.28	2118.03	7659.05	2668.89	2565.38	2674.86
M431T71			0.28907	1.29133	0.29875	431.25	70.583	1427.84	1962.67	3077.96	3797.71	1985.55	4399.88	1759.81	2604.53	4897.96	2739.95	4714.78	4785.74	2145.04	2074.44	1933.21
M384T77_2			0.407392	1.29131	0.462533	384.255	77.185	6957.34	7407.21	4245.72	1011.94	3407.61	5739.23	5647.31	4659.83	11216.9	5593.33	9507.05	525.276	4122.86	4123.72	4247.34
M453T73			0.801228	1.29113	0.367117	453.23	73.45	12782.2	25351.3	20687.8	11605.2	10099.7	10988.3	18884.3	17993.9	37941.5	15455.1	18768	9114.65	8961.98	8919.14	8962.01
M867T317			0.887973	1.29109	0.300872	866.588	317.487	14817.9	18985.8	11069.1	7882.19	14906.3	11436	10870.4	19019.5	12007.1	30092.1	10028.1	20104.6	14672.8	14674.9	13798.2
M313T80			1.65013	1.29104	0.195615	313.238	79.536	45610.6	50931.3	32985.3	9076.69	33992.4	33184.9	36974.1	41591.2	36729.2	53678	36705.3	59994.6	35829.4	37378.1	37435.6
M294T925			0.154414	1.29102	0.358891	294.05	925.3	459.494	1145.68	2287.14	841.122	1460.51	1526.99	2509.26	1703.22	1991.7	1828.15	1575.23	360.314	1810.39	1811.03	1875.65
M530T374			0.7	1.29089	0.225548	530.321	374.125	9553.69	14846.4	11135.8	6586.76	10729.3	8508.76	21263.7	17193.6	8982.99	11157.1	10751.8	9860.7	10551.4	10635.8	10551.2
M414T791			0.300345	1.29088	0.237995	414.185	790.66	3708.05	3651.52	2390.17	1962.07	2354.69	1147.96	3354.79	1758.94	4020.49	4450.94	3758.15	2296.78	2544.85	2544.29	2660.14
M244T79			0.27968	1.2908	0.290814	244.2	78.969	1161.1	1209.94	1908.25	165.593	2487.92	1190.05	1630.19	1504.05	2400.92	1690.72	1387.81	1871.24	2658.72	2458.26	2460.27
M253T79			0.719408	1.29053	0.077065	253.143	78.509	7138.87	7787.51	8616.4	5980.12	10662.3	5362.99	7403.38	11107.3	10640.3	12499.3	9197	7933.93	6835.2	6553.88	6549.54
M678T68			1.33165	1.29052	0.831497	678.477	67.949	28270.8	161902	9016.31	6421.18	28723.6	2595.19	2668.88	4622.84	4825.35	5049.99	6432.08	282163	3226.47	3279.87	3226.06
M411T273			0.383246	1.29037	0.244638	411.057	273.31	1653.4	2959.59	3861.1	1489.28	5418.77	4994.17	5207.39	3381.82	4032.61	5183.33	5444.31	3043.59	5851.37	5853.39	5933.42
M1043T620			0.279494	1.28988	0.0706042	1042.69	620.19	2941.08	1931.59	3141.99	1731.36	2816.02	3471.36	3707.3	3504.54	4356.17	2469.15	3573.86	3070.2	2074.08	2078.54	2248.06
M583T544			0.240033	1.2895	0.263205	582.966	543.832	233.3	442.121	763.263	1245.61	1488.06	1133.07	1342.82	1121.05	990.197	1037.96	918.726	1430.6	960.487	1003.43	966.977
M717T261			0.569858	1.28937	0.221516	716.522	260.705	5702.14	5830.61	3762.84	5123.47	3338.07	5820.25	3699.69	5111.24	5824.17	7067.29	5623	10810.8	5355.97	5327.87	5275.58
M151T230			0.202353	1.2891	0.425062	151.022	229.789	1761.81	980.537	1939.3	1076.4	350.878	1343.15	752.602	1295.12	3326.08	1363.43	1568.11	1301.1	1344.93	1342.39	1474.46
M364T649			0.567702	1.28889	0.433491	364.058	648.506	11429.3	9778.4	9432.58	3823.65	1498.77	7574.4	5533.65	2933.97	11016	6992.01	14305.1	15334	3375.15	3374.67	3689.95
M163T12			0.278526	1.28886	0.264343	163.132	11.797	5201.37	4403.52	4298.66	4619.83	4585.27	2718.77	6881.48	4493.03	9867.01	3503.96	3689.19	4853.26	3467.4	3452.63	990.852
M662T711			0.875868	1.28854	0.143925	662.474	711.397	11915.1	17611.5	19680.2	8173.63	21890.4	22040.6	21564.7	14287.9	22557.7	22408.6	20039.6	29685.1	21318.8	20926.9	21317.1
M1091T660			1.26063	1.28831	0.189826	1090.97	659.712	16345.9	26027.6	42567.7	38515.1	24566.3	23216.5	42356.8	47008.1	35562.3	45097.9	19783.9	30799.4	17766.3	16936.4	17580
M514T736			0.624951	1.28785	0.327005	514.323	735.619	6524.02	6203.58	16710.8	8479.76	7853.68	8963.46	21336.7	9609.56	8407.17	11695.4	8313.18	11129	10666.2	11125.4	10664.9
M708T776			0.235599	1.28773	0.175039	708.236	776.273	589.174	1061.48	1271.68	1285.9	1574.83	1073.24	1485.99	1452.97	1068.82	1248.95	1252.34	2320.01	1550	1465.13	1626.17
M597T400			0.315565	1.28763	0.656405	597.486	399.993	4325.14	289.19	2600.41	4077.96	3872.46	4375	403.786	228.456	5756.65	433.901	6307.86	12029.8	591.693	591.953	630.589
M423T661			0.337393	1.28759	0.270402	422.99	661.115	969.532	3163.56	2658.67	2626.3	2008.38	1378.43	4628.34	2324.55	2265.04	1855.5	2576.65	2837.39	3000.71	3161.45	2930.94
M521T733_1			0.569393	1.28738	0.167547	520.919	733.368	7534.07	10749.3	6839.57	9475.12	16016.7	7885.2	12325	18254.6	11109.1	12348.3	12523.8	8750.77	18460.7	17761.8	17456.2
M193T658			0.337121	1.28737	0.397556	193.155	657.931	5188.81	3179.53	851.085	1648.35	1062.77	4345.02	3007.37	5407.89	1745.05	3537.79	3689.31	3565.24	2484.15	2699.48	2505.61
M783T174			2.82174	1.28727	0.595228	782.568	173.816	63816.8	60608.6	101258	121640	489638	747235	226955	669653	201791	213807	325010	402069	141914	197862	197796
M677T370			0.186659	1.28724	0.515228	677.496	369.601	988.715	63.0806	2646.18	1571.36	1873.27	2244.55	3922.44	568.493	1084.58	2940.32	2632.66	935.073	3285.15	3281.48	3386.37
M278T176			0.476014	1.28717	0.260763	278.061	175.791	1271.75	6851.31	3363.47	3205.58	2895.4	4727.14	3860.4	4962.06	6489.61	4689.66	3351.86	5369.05	2332.12	2564.04	1943.32
M333T597			0.251139	1.2871	0.122944	332.955	596.852	906.923	1262.43	1137.29	1462.18	1788.14	1670.96	1802.67	2143.48	1180.56	1343.31	1709.28	2410.81	1852.39	1467.91	1840.87
M527T811			0.0855404	1.28707	0.494966	527.112	811.009	181.688	99.1392	585.43	314.548	573.191	752.357	1060.59	566.798	336.76	636.123	539.06	86.5242	935.826	945.55	958.66
M372T305			0.229133	1.28707	0.491739	372.098	305.345	2215.56	3368.98	646.376	790.617	378.61	3427.91	598.595	3015	3133.52	2671.06	3237.57	1280.69	2789.39	2835.07	2835.19
M277T52			0.24798	1.28705	0.204692	277.129	52.047	2303.71	2498.75	1449.1	1635.79	1826.55	314.178	1971.48	2573.96	2368.53	1563.73	1951.28	2477.63	2741.17	2740.92	2789.38
M435T329			0.202313	1.28667	0.484982	435.266	329.331	1250.86	890.308	896.009	1901.46	3740.73	2234.13	3585.51	2053.61	3133.55	1154.99	3756.42	357.964	1890.48	2432.7	2439.16
M610T313			0.370601	1.28664	0.468776	610.283	312.877	4593.43	3395.41	3386.15	808.014	1595.94	516.325	3387.23	1993.26	3865.39	3787.1	4736.82	623.134	3097.94	2561.82	3087.71
M871T82			0.352585	1.28646	0.332434	871.495	82.305	1949.38	1728.39	2878.5	4045.42	1116.69	3372.63	806.233	4487.36	3702.55	4245.3	2805.91	3366.64	2485.48	2279.93	2280.19
M312T831			0.277524	1.28632	0.247842	312.002	831.375	1644.36	1915.81	984.584	724.791	1292.76	992.289	1629.59	1876.06	2589.68	1020.86	1360.41	1241.02	1040.25	1040.2	1095.37
M507T72			0.222189	1.28621	0.26816	507.188	71.82	1143.54	1096.71	1071.77	1076.73	947.519	806.107	987.498	1402.8	800.727	2471.63	1094.78	1142.93	1020.95	968.368	1020.34
M785T327			1.3968	1.28611	0.35474	784.581	327.297	66195.4	63587.9	40795.9	32798.5	44488.1	78277	30368.2	59998.5	93092.9	53038.9	54411.7	128546	36850.6	37020.5	40151.7
M763T82			1.60369	1.28595	0.721595	762.59	81.6125	63608.8	67805.4	19535.4	9160.34	18000.8	153636	56337.8	9017.92	26649.7	252891	50707.7	31003.5	70533	70279.4	70278.3
M217T592			0.179143	1.28594	0.492901	217.116	591.843	2096.54	1441.76	694.467	3584.21	938.398	588.172	360.889	2711.73	1108.28	2507.94	2925.39	2401.04	2353.67	2355.73	2209.66
M198T638			0.24199	1.28585	0.210407	198.052	637.941	1322.85	1018.27	2151.49	1232.92	1882.13	3392.71	2427.13	3018.98	2305.98	2319.39	2288.66	1784.71	2293.88	2239.42	2240.19
M529T739			0.181589	1.28579	0.334377	528.848	738.617	838.566	1098.81	3630.51	3339.64	1666.67	3234.91	4693.29	2330.33	2825.22	2347.46	3505.29	2054.03	5547.9	5547.48	5656.93
M814T368			0.268048	1.28551	0.541818	814.403	368.23	444.599	185.589	853.328	2813.96	1122.48	2351.19	1701.14	760.174	477.406	1976.28	3182.66	1892.25	2512.84	2518.38	2128.29
M285T605			0.190486	1.28551	0.102385	285.122	604.661	831.256	761.851	704.163	1109.12	645.055	726.937	955.123	884.848	1065.91	924.825	786.647	1525.3	823.495	824.745	862.619
M190T36			0.0815707	1.28548	0.670622	190.122	36.2695	2994.77	1298.37	1151.63	1215.39	1369.27	385.061	962.109	1415.39	5988.4	878.292	591.768	980.712	640.319	587.189	664.964
M363T604			0.13779	1.28535	0.223723	363.126	603.735	743.424	326.344	623.535	1494.44	694.353	757.422	1243.64	949.86	922.225	785.23	994.56	1067.88	918.216	901.45	913.568
M115T1356			0.453053	1.28533	0.481238	114.935	1355.81	3479.16	4062.93	5097.74	3064.85	2844.63	2390.32	3029.49	3411.94	3315.16	2977.38	3192.64	10987.7	5299.08	5256.16	6409.67
M740T303			1.07845	1.28517	0.426742	739.535	303.303	5980.37	5810.48	30579.1	22708.4	15680.9	24913.2	17360.1	28564.4	22227.4	23485.2	6079.14	38090.8	21602.9	20933.1	20642.6
M274T72			0.179786	1.285	0.261531	274.187	72.485	1508.36	1677.77	864.479	1381.31	2163.42	1635.49	2663.07	2325.01	1311.61	1627.66	2971.33	962.938	856.024	921.782	867.258
M577T428			0.254208	1.28494	0.543249	576.933	427.958	1359.99	4627.38	1899.22	1786.34	3732.04	1812.33	7550.9	1365.38	2066.29	2617.25	4831.91	1121.66	6931.43	4675.43	6955.3
M385T65			0.375572	1.28484	0.375045	385.309	65.3955	4097.61	3010.94	4061.43	2399.71	3303.37	3359.91	2626.57	2158.99	8457.76	3580.96	3056.07	6115.73	2914.6	2915.02	2990.34
M525T75			0.313391	1.28476	0.410063	525.425	75.16	3834.03	3508.52	2227.1	1065.57	4450.12	3623.47	3313.85	3438.12	8329.97	2867.58	3951.69	2135.19	3273.55	3055.28	3286.17
M701T639			2.51011	1.28429	0.610787	701.022	639.138	36588.3	30138.9	150747	357825	57523	64562.1	121368	233837	173191	41613.9	65878.1	259758	115552	107125	105903
M450T352			0.349416	1.28415	0.432811	450.261	352.026	977.707	2173.48	4640.23	1681.25	8907.69	4175.27	5543.46	5671.11	4923.6	5931.09	4665.26	2230.28	4064.45	4482.46	4078.67
M904T638			1.42677	1.28386	0.50466	904.008	637.92	18336.8	28657.5	29215	87079	24976.9	37540.3	25116.2	40040.7	41812.8	102185	27278.2	53470.2	47198.9	45426.6	43988.6
M358T803			0.18543	1.28372	0.451463	358.215	803.453	2132.1	1928.36	1988.83	1185.45	701.197	2584.87	1662	1182.49	1432.66	1171.17	3807.09	4250.34	868.054	1153.63	1158.06
M179T563			0.218034	1.28358	0.391792	179.003	562.918	1165.59	576.396	1057.76	1372.87	1095.63	950.198	968.32	1141.04	1036.29	1043.47	920.318	2872.44	741.214	763.816	741.585
M266T822			0.229971	1.28351	0.154525	266.005	822.132	1236.1	1157.2	686.963	513.625	1045.08	1025.23	1706.3	1168.54	1118.88	991.559	1453.7	831.094	1339.14	1334.78	1273.68
M671T294			0.647841	1.28324	0.649263	671.38	294.059	654.589	1337.88	3551.14	2965.24	4460.03	21050.1	5339.82	6145.19	4382.47	10943.5	4625.45	12218.1	3818.07	3813.96	4071.79
M563T994			0.110969	1.28301	0.124934	563.183	993.829	205.923	486.599	408.431	214.646	366.492	389.99	314.633	443.869	523.325	359.658	488.185	528.824	409.324	409.382	429.016
M514T77			0.429522	1.28298	0.0263328	514.257	77.3385	2540.87	2694.62	2583.04	3052.92	1974.13	2611.45	3316.15	3831.48	2761.09	4153.28	2661.36	3107.74	2637.53	2646.05	2543.39
M695T732			0.280456	1.28295	0.299935	695.071	732.293	1112.3	1599.22	1887.17	1403.31	1559.95	2068.67	1619.86	3413.86	1659.13	3060.37	942.023	1660.37	1157.42	1069.21	1069.49
M241T732			0.348558	1.2828	0.311221	241.094	732.395	4122.89	2409.14	8657.02	3811.42	8453.07	9006.87	10860	8478.11	6942.91	8622.07	8797.03	3071.4	13082.1	13258.2	13254.3
M361T731			0.201654	1.28258	0.318063	361.079	731.309	1308.7	998.235	1581.77	1625.16	2013	1863.3	2336.78	1191.62	1920.52	3548.38	2233.07	813.29	1967.18	2069.64	2070
M684T48_2			0.610757	1.28253	0.244196	684.202	48.268	23782	20582.8	19170.2	14633.8	8396.56	22327.3	10531.3	22511.2	23500.3	24377.7	36884.8	21853.1	22221.6	22221.5	21966.4
M334T53			0.210999	1.28247	0.697388	334.273	52.893	6393.48	3415.51	3365.24	3877.54	3947.26	2139.81	1639.88	18102.6	3252.78	1082.46	3618.59	1978.54	1797.21	1598.34	1564.59
M443T75			0.282405	1.28197	0.243149	443.247	74.752	3207.72	3873.13	1573.92	1591.34	2317.02	3208.28	5167.26	2601.89	3851.34	2043.05	3711.28	2843.66	1373.09	1226.56	1218.05
M825T312			0.843695	1.28196	0.473928	824.577	311.849	11818.2	31505.8	16168.4	13403.4	33607.7	12290.2	7407.07	28131.5	31002	19473	14846.5	51428.3	14472.2	14300.6	18275.9
M595T50			0.320212	1.28194	0.147378	595.43	50.397	1939	1841.92	2508.25	1048.52	1990.24	1471.18	2409.77	2418.38	1371.77	2999.62	1810.95	2833.34	1374.09	1339.67	1301.05
M190T443			0.438986	1.28183	0.256503	190.043	443.18	2845.05	5359.7	2027.14	2450.49	2420.54	1992.47	3782.3	2832.07	4613.61	3220.95	2411.61	5052.88	1815.47	1977.03	1971.54
M441T607			0.139004	1.28162	0.156113	440.832	607.175	430.23	659.778	555.436	279.372	458.512	428.286	352.067	618.523	452.784	656.523	759.692	763.835	328.231	327.727	359.275
M468T793			0.278888	1.28159	0.106771	468.139	793.22	1216.77	1818.37	1419.61	1021.54	1159.18	1841.17	1800.47	1342.39	1947.95	2093.48	1297.44	2381.82	1379.07	1274.85	1390.93
M1060T688			1.62832	1.28158	0.409879	1060.01	688.159	31800.8	16648.9	79074.2	57830.8	77970.3	39358.5	66717.1	43284.8	28552.6	92425.4	46677.1	110255	56941.3	57010.4	45618.1
M839T261			1.35491	1.28141	0.562244	838.621	261.42	30042.3	53558.9	54241.9	38698.1	45562.6	144312	80535.1	178753	58115.3	96372.9	25612.9	30138.2	66454.6	50942.3	52449.9
M366T731			0.414637	1.28135	0.102101	366.108	731.227	3001.11	3083.69	2602.98	2647.09	2983.82	2822.48	3453.11	1929.73	5295.47	3696.32	3658.9	3930.22	2200.81	2385.71	2392.86
M575T636			3.20284	1.28116	0.244261	574.992	635.546	115829	243003	71307.5	212899	205859	95800.8	212600	119014	231322	228661	164422	254291	138859	174018	173046
M642T392			0.333928	1.28091	0.402474	642.112	392.035	2872.03	1186.28	2571.76	4467.29	4497.44	4321.38	6243.44	3388.97	2813.97	3055.34	7811.85	2197.23	4579.64	4591.61	5105.76
M400T895			0.263186	1.28084	0.0721896	399.903	894.708	1325.28	1028.96	1526.64	894.908	1263.45	1290.81	1766.7	1903.33	1210.37	1602.69	1057.49	1848.02	1392.86	1273.72	1392.38
M509T662			1.7229	1.28081	0.430322	509.02	662.068	69101.5	88568.2	123900	55686	23123.4	37381	107393	54714.4	132146	53773.1	35413.4	126016	72120	83453.2	71857.7
M304T522			0.209617	1.28069	0.307508	304.211	521.929	1598.63	1556.95	653.478	473.731	645.805	995.429	1288.27	1083.48	1188.63	971.785	1007.81	2046.87	707.989	707.727	728.943
M255T421			1.00136	1.28063	0.280263	254.934	421.226	8921.15	15135	30364.2	15462.8	33628.3	38198.4	41028.8	26117.6	25433.3	37085.9	31281.5	20531.4	38900.3	37494.8	37453
M234T54			0.225228	1.28057	0.288939	234.184	53.6325	1214.88	2577.52	380.231	968.305	1282.93	1114.13	1525.91	1367.83	1313.57	1597.04	1957.04	1891.54	1208.12	1209.31	1062.14
M763T730			0.305504	1.28055	0.240728	762.875	730.273	1575.03	1395.43	1313.09	1466.61	1948.24	2624.48	2000.94	3361.8	1212.17	2858.02	1518.71	2267.36	2014.91	2073.44	2017.28
M503T380			1.40863	1.28041	0.627733	503.294	379.75	44242.9	92013.2	7247.93	17270.7	7023.66	28126.3	81096.9	78630	27069.1	32922.1	27025.6	4121.07	53810	53634.2	41795.7
M609T874			0.270185	1.28037	0.386975	609.055	874.127	1331	4178.39	2255.79	982.572	2078.48	2006.7	2049.1	4879.4	3031.49	1770.96	1794.36	2905.54	1845.06	1846.46	1949.78
M144T546			0.2429	1.28019	0.221608	144.029	545.521	1012.24	1034.37	715.592	1632.47	669.681	1118.21	1381.01	1084.21	1714.68	724.026	1164.23	1846.68	895.22	890.597	969.819
M152T362_2			2.37594	1.28006	0.369999	152.002	361.704	244727	11410.2	244878	63549.4	232185	181602	277552	166410	295843	159888	198800	153854	124582	124751	135389
M718T362			0.465729	1.27996	0.277969	717.587	362.08	6537.2	6839.22	6315.17	6087.27	6130.51	6171.57	8683.4	5351.58	4553.35	5698.52	9858.86	14596.2	6128.75	6262.82	4315.29
M841T87			0.454888	1.27943	0.538089	840.573	86.599	15949.3	7273.76	2964.79	4432.36	1635.26	20179.4	4202.06	8262.12	20873.6	11474.1	10269.1	12006.1	7556.88	6212.35	7581.51
M388T593			0.376985	1.27906	0.134965	388.034	592.55	3316.7	3917.12	3501.29	2758.24	2854.73	3011.48	3927.89	5411.13	5341.95	4843.47	2567.37	2670.22	2405.45	2405.72	2323.6
M816T359			0.431543	1.27902	0.564851	815.69	358.514	6255.05	4808.21	5410.1	1367.64	5164.81	6533.76	2832.16	6934.95	3154.11	3095.73	5059.2	16705.5	8460.8	8587.85	8588.14
M515T61			0.0460163	1.27885	0.559111	515.358	60.898	2451.47	1279.86	852.048	2343.54	1447.08	797.119	1325.57	1090.79	1453.7	1288.94	5151.96	1417.48	796.254	827.642	827.436
M1091T720			0.329927	1.2787	0.133427	1091.47	720.165	3619.65	3330.64	1627.71	1633.28	3189.24	2506.18	2571.49	3890.15	2892.05	2878.87	3922.46	4184.96	1031.52	1040.95	1031.55
M286T530			0.209368	1.27868	0.463122	286.064	530.073	479.081	2047.96	2696.37	1104.32	3446.37	2022.52	4801.04	1454.04	2150.87	1818.68	3613.23	1246.25	2254.08	2251.49	2374.97
M517T676			0.411087	1.27859	0.255766	516.95	676.44	3119.21	2140.08	6382.22	4913.03	4200.53	3711.78	4915.04	4060.63	8717.9	5215.64	4135.16	4238.68	4545.01	4757.86	4787.99
M1067T639			2.48794	1.27824	0.474413	1067.01	638.818	46890.1	91246.4	118064	165369	91670.3	103538	87657	82809.7	125232	94339.2	94250.4	304102	121173	157652	123767
M447T76_1			3.24827	1.27801	0.116636	447.133	76.362	121656	200079	271206	175674	167411	189413	200127	317252	297511	176569	232658	214205	168472	168475	170296
M137T335			1.08963	1.27786	0.234828	136.616	334.898	31176.5	27939.1	20160.1	19414.8	17455.3	14969.5	41106	29148.2	21483.2	38263.2	17929.1	19617	24364.8	24223.1	27819.5
M789T303			0.732879	1.27756	0.267673	788.522	302.951	24586	17711.6	14310.6	13238.3	13820.8	15863.4	18195.1	19090.5	21899.3	12175.6	18237.9	37558.4	16304.5	15886.3	16303.2
M284T285			0.369393	1.27756	0.510008	284.042	284.982	1726.9	8723.34	3017.46	4470.26	2183.88	2591.01	5572.12	2870.51	9526.47	1675.02	5336.55	4036.39	2588.96	997.545	2554.48
M226T120			0.0784044	1.27743	0.562156	226.216	119.883	2402.23	2450.27	18940.3	6223.93	8064.27	5182.35	10366.3	8756.36	18365.3	4933.36	10001.1	2843.37	3710.49	4190.44	3795.15
M873T729			0.258504	1.2773	0.31934	872.891	728.618	1552.46	1257.48	2257.16	2265.75	922.122	1610.73	975.588	3101.51	2495.7	2512.14	918.72	2597.8	2678.97	2676.65	2920.41
M173T505			0.188559	1.27723	0.500634	173.128	505.24	1659.6	964.477	991.024	690.23	892.913	704.755	553.029	1221.35	1463.77	2918.76	706.388	676.203	580.846	618.021	617.687
M297T71			0.549208	1.2771	0.380055	297.279	71.3735	2585.11	7335.06	5634.09	4770.01	2055.97	5501.55	3456.81	4667.94	5074.3	9609.54	3514.25	9285.06	3874.83	4986.54	5014.48
M197T50			0.147739	1.27705	0.343548	197.08	49.84	978.242	1118.14	1792.02	2571.95	2224.51	2937.21	4206.84	1605.71	3123.62	1795.64	2626.34	1483.76	1774.55	1721.79	1743.89
M1014T718			0.375954	1.2769	0.218538	1014.45	717.509	1594.29	4286.6	2179.4	3010.45	2015.54	3739.38	3882.78	3158.83	2967.54	3282.31	2748.23	5444.91	4487.36	3720.74	3705.89
M892T654			0.46015	1.27672	0.450201	891.526	654.014	5486.76	9619.11	5596.5	6178.12	6312.01	4805.06	5841.61	5161.72	18608.1	6006.56	5817.05	7077.34	8093.06	10139	9597.42
M802T73			0.375697	1.2767	0.331331	802.496	73.005	4033.24	7358.83	10124	6657.24	4168.25	4333.95	10376.5	11399.8	8930.25	3536.22	4109.63	8471.36	9405.09	9390.67	9456.27
M353T73_1			0.106378	1.27657	0.578823	353.171	73.017	5158.86	3061.73	4720.92	5537.73	2760.8	1536.17	2741.83	3661.67	13301.4	4168.74	2348.77	2853	1553.37	1754.95	1552.71
M681T732			0.266307	1.27651	0.197525	680.874	732.314	1303.2	1449.24	2011.33	1312.35	1779.27	1045.53	2733.54	1792.86	1647.73	2352.99	875.444	1959.58	2959.14	3135.08	3132.54
M816T73			0.32554	1.27648	0.289703	816.48	73.017	4485.01	4903.95	2393.15	2391.09	3046.27	1368.56	5529.66	2836.8	2814.11	3227.95	5629.1	3689.62	3436.19	3360.37	3812.98
M873T48			0.350562	1.27628	0.501173	872.767	48.007	6658.42	4202.45	1576.49	802.48	2393.53	1745.01	3149.96	1428.75	3510.19	6876.61	3980	3234.2	6923.98	6795.55	6793.3
M524T592			0.371001	1.2761	0.177382	524.044	592.477	4346.27	3464.63	1512.54	1404.63	4006.13	2256.66	3973.72	3373.26	3337.01	3784.16	3264.21	3949.71	2597.21	2593.74	2015.59
M477T889			0.237517	1.27608	0.294812	477.077	888.639	1517.78	1436.85	406.847	1074.76	679.389	882.597	1598.83	1267.29	1829.45	592.39	1327.5	1038.77	1085.16	1101.97	1101.76
M773T307			0.609696	1.27597	0.223312	772.582	307.084	11541.8	14752.9	8354.67	11668.6	12905.9	13918.9	11359.2	15530.2	16794	7984.25	16148.4	25511.9	9665.89	9129.37	9130.2
M163T72_1			0.258651	1.27591	0.479751	163.073	72.2815	2085.86	926.299	1253.75	559.914	3912.18	4483.97	1770.53	3627.24	4349.87	2723.73	1118.09	3280.54	3260.43	3225.74	3226.46
M400T602			0.2622	1.2759	0.418734	400.268	601.896	1629.67	2028.1	2734.16	2240.35	1892.43	2441.84	4627.18	4959.04	2281.76	2246.86	658.798	1770.38	1488.26	1450.23	1450.57
M133T54			0.330549	1.27582	0.128181	133.1	53.936	2298.93	2433.27	3547.73	1978.13	1661.54	4072.28	2805.86	2797.97	3914.96	4044.16	3231.43	3608.4	2134.14	2019.7	2137.69
M467T49_1			0.576544	1.27567	0.33236	467.372	49.408	7468.97	11515.5	4519.81	3546.92	4446.32	4203.03	5487.46	7429.1	4768.17	10243.4	6691.43	10922.6	6544.27	6767.14	6767.39
M106T1241			0.566706	1.2756	0.344777	106.041	1241.32	6236.03	11334.6	6245.91	4923.73	6035.71	4784.52	7144.35	15174.4	10489.5	6631.35	5557.48	5466.4	15299.9	16418.3	15091.3
M713T777			0.627505	1.27542	0.270913	713.178	777.111	3423.11	6856.84	8087.2	9487.52	7852.69	12837.4	8331.88	11887.9	13053.6	9154.42	4951.23	14535.7	11125.9	11757	11827.9
M458T597			0.321047	1.27531	0.134896	457.958	596.698	1304.63	2330.11	2838.91	1990.69	1497.78	3202.67	2798.32	3477.37	2708.85	2464.8	2055.26	3284.64	2474.9	2291.84	2478.37
M653T829			0.638172	1.27518	0.0999557	652.755	829.466	6262.5	5036.27	7919.51	2930.99	8008.39	4633.56	7926.61	6596.39	7259.41	8482.73	6299.3	7800.77	6471.12	6477.02	7222.21
M214T1348			0.403913	1.2751	0.459207	214.135	1348.15	2481.31	2353.74	6556.72	1434.25	2437.99	6407.18	3357.58	7637.67	2319.04	6880.09	4665.28	2773.33	2557.23	2636.63	2636.3
M585T994			0.154969	1.27509	0.268977	585.162	994.415	191.258	964.846	784.545	586.515	858.329	871.418	425.012	1123.46	1239.6	821.445	778.37	1040.04	654.892	576.057	653.847
M826T79			0.4222	1.27479	0.482482	826.486	79.1645	4414.69	3799.38	2532.76	993.263	1308.7	3961.12	1357.97	3127.4	3355.25	5970.39	1430.65	6442.38	3373.18	3406.89	2330.97
M279T177			0.49028	1.2747	0.474456	279.056	177.417	11564.4	1327.83	7667.48	4969.55	11843.2	11409.7	4208.34	14438.6	7221.86	6276.3	20200.1	9837.27	5247.75	5881.97	7065.82
M655T772			0.166253	1.27465	0.283046	654.745	772.285	829.745	1184.57	2017.26	1655.3	1156.99	944.852	945.884	1418.56	1562.36	2474.09	2346.27	1180.72	1862.57	1877.8	2076.86
M359T673			0.266691	1.27458	0.298417	358.992	673.064	2067.3	849.688	2226.33	2309.16	1866.7	1401.45	3676.77	1038.52	2522.95	2809.76	2079.59	1536.75	4979.72	3088.92	2996.22
M219T496			0.310713	1.27453	0.626641	219.077	495.692	2417.41	3796.23	1167.14	732.84	1181.87	1050.33	1219.28	749.159	1918.44	2420.14	830.83	6048.25	1826.82	1830.18	1955.04
M657T50			0.296317	1.2745	0.29948	657.431	49.8895	3280.79	2834.19	1312.5	1585.1	1977.57	1291.99	2163.94	2181.52	1386.65	2783.42	2980.9	4157.21	1505.91	1600.29	1603.71
M335T49			0.783478	1.27446	0.288615	335.257	49.043	15974.5	17175.2	9816.55	3985.93	11585.3	12029.6	9694.41	15063.5	11892.2	24779.5	13041.7	15463.9	15597.4	15388.5	15388.7
M340T51			0.986136	1.27412	0.705908	340.249	51.075	134857	6725.43	90658.3	10048.2	5474.31	12246.3	50135.6	140656	64450.4	5645.73	4070.66	66324.2	8935.6	69233	69288
M88T1326			0.230885	1.27411	0.269719	88.0747	1326.13	2269.54	2775.12	3775.91	3808.22	550.833	2795.75	3606.97	3324.55	5157.84	2793.37	2491.64	2980	3451.06	3495.32	2445.5
M719T362			0.526721	1.27386	0.37941	718.592	362.147	7098.62	8919.09	6843.28	3839.42	6600.51	7267.84	9404.04	7908.84	3809.57	5658.05	7670.62	17227.9	7015.62	6998.51	6555.52
M319T828			0.236421	1.27382	0.205571	318.873	828.048	757.298	1574.06	871.468	582.671	927.433	943.204	1197.03	1220.85	1822.01	1003.08	995.74	966.177	946.478	521.72	916.887
M562T75_1			0.287643	1.27381	0.339866	562.271	75.255	2712.23	2314.36	1008.71	1151.97	1365.9	1497.95	1992.62	1004.02	3303.76	1870.56	3075.67	1556.62	1772.04	1715.98	1716.43
M256T852_1			0.184013	1.27356	0.166759	255.9	851.857	657.871	381.095	315.478	833.332	505.108	902.949	605.096	888.863	622.044	872.092	811.19	780.221	1190.12	1128.24	1126.92
M201T37_2			1.15149	1.2735	0.720921	201.022	37.367	102263	42008.8	16644.3	28499.6	23305.6	9106.61	21085.1	10994.2	164699	29997.4	19631.1	36091.3	13966.4	13353.3	13955.3
M531T794			0.154993	1.2734	0.206807	530.853	793.598	195.764	310.46	383.868	346.081	687.701	436.364	539.808	413.046	332.984	567.884	559.623	592.184	473.197	505.857	473.243
M839T618			0.298974	1.27332	0.130526	838.667	618.17	2214.49	3150.97	2537.29	2473.02	2172.66	4902.6	3643.01	3981.5	4534.34	2823.19	3761.64	3476.98	1802.46	2013.64	2033.27
M532T714			0.42862	1.27329	0.295164	532.091	714.281	1261.61	5213.24	1929.36	5217.49	3145.51	2511.24	4368.52	3320.43	5934.58	3240.01	4021.83	3661.6	3479.57	3462.02	3665.53
M855T84			0.25312	1.27326	0.493374	854.585	83.589	414.064	670.243	1254.28	2313.34	297.324	2895.29	553.648	1618.09	2003.81	1593.53	1931.87	2287.15	1603.05	1459.76	1462.29
M929T736			0.15174	1.2732	0.362066	928.742	736.194	410.77	247.832	944.303	983.041	1544.65	1304.78	1141.72	1128.71	839.456	1696.1	1475.24	639.115	2276.56	2346.27	2275.32
M373T48			0.1563	1.27318	0.370986	373.098	48.005	3479.66	2007.47	1624.85	2051.42	2319.19	4053.06	4492.57	1262.5	3469	1976.2	5559.9	3019.44	6174.11	6582.33	6582.23
M479T789			0.174102	1.27315	0.112019	478.787	788.717	426.273	581.25	405.033	234.538	364.926	418.729	429.582	689.006	455.329	579.538	402.136	539.122	585.146	589.444	645.116
M729T278			0.219488	1.27295	0.270173	729.441	278.238	1449.48	362.286	1432.05	1037	1302.78	1386.04	1525.7	1028.44	1510.5	2442.82	1285.59	1078.95	1159.05	1158.83	1000.57
M358T72_1			0.66389	1.27285	0.0974485	358.24	72.119	11813.5	13651	13792	5417.69	15357.2	12566	15539.2	14898.2	16161.8	10775.8	15811.7	19218.8	10391.7	10728.1	10730.4
M214T892			0.235758	1.27263	0.145721	213.987	892.404	1031.81	1618.5	1042.86	655.764	722.059	1311.75	1078.36	1850.47	1193.7	1378.69	1250.17	1371.46	1096.35	1135.33	1096.79
M257T894			0.686346	1.27254	0.184852	256.927	894.279	5702.9	10397.5	10743.8	7711.61	5858.24	10340.1	10724.3	11952.4	10783.6	14135.8	4746.61	12244	10342.2	10392.5	10392.6
M788T304			0.246894	1.27249	0.423351	787.512	304.457	4315.41	7972.79	5485.28	5239.12	10858.7	6514.24	4581.54	8576.67	17244.9	3708.51	7694.82	9583.77	7825.01	7629.54	7637.41
M565T67_2			0.0914546	1.27242	0.578154	565.365	67.461	2465.85	1656.59	1232.08	633.678	933.427	1078.52	753.015	821.083	4375.21	913.033	1199.5	2117.71	921.75	1012.01	908.516
M643T75			0.396394	1.2724	0.213977	643.378	75.2325	5043.21	4551.89	5431.71	1049.21	5501.02	5608.78	6570.58	6895.86	4788.12	3458.39	5562.44	7315.83	3971.13	5087.83	5099.56
M738T934			0.451242	1.27235	0.118486	737.562	933.994	3770.71	6076.91	4713	4179.32	3243.24	4300.19	6865.03	5395.18	4830.89	7613.24	4928.29	3809.06	6523.04	6638.92	5502.22
M458T843			0.263522	1.27235	0.0533366	457.887	843.488	1227.58	918.435	1020.24	519.071	1202.17	1410.72	1356.68	1368.09	1248.66	1449.18	1271.42	1319.48	1072.14	1224.88	1088.53
M669T296			0.419456	1.27207	0.522201	669.363	295.629	723.886	1022.48	3868.82	2125.67	1470.37	6496	3599.72	3575.34	2703.29	3814.32	967.196	5320.9	2934.43	2933.05	2378.58
M271T805_1			0.367823	1.2719	0.448184	270.968	805.277	2142.62	3728.03	2526.64	977.368	1596.98	2759.83	2444.44	1907.29	3464.56	2494.47	1181.5	5972.75	1649.32	1821.49	1823.99
M382T722			0.509536	1.27183	0.058083	382.098	722.137	4137.15	5007.66	4551.52	3799.88	4837.7	7053.79	5729.53	7142.62	7169.19	5932.28	6805.15	4597.48	6024.72	6069.28	5699.14
M714T298			0.473236	1.27167	0.20499	713.558	298.073	4264.35	2889.05	3413.53	3098.56	5199.76	3367.87	2362.95	4895.06	4676.92	3825.67	5347.46	7165.22	4449.39	4491.95	4520.85
M415T619			0.59591	1.2716	0.381228	414.896	619.339	12691.4	11518.6	9712.85	2080.25	19880.1	19821.3	21288	19346.1	21132.3	9615.7	6829.57	18054.2	12233.3	12205.1	9013.66
M363T67			0.423318	1.27159	0.407397	363.325	66.598	3273.08	3889.81	4411.97	2525.51	2459.1	2724.07	2300.44	1795.22	5485.32	5687.59	1995.7	7256.42	2819.11	2677.13	2817.06
M742T302			0.376926	1.27086	0.455716	741.538	301.511	535.592	637.782	4089.85	3271.03	3006.41	2433.88	1635.7	3210.37	2054.21	5175.3	1914.46	3769.63	2518.49	3045.92	2708.75
M367T444			0.176701	1.2708	0.514765	367.037	443.923	426.231	1748.12	318.665	1317.56	527.399	1204.75	682.589	1592.52	2225.89	675.238	411.99	1455.45	587.741	582.36	530.335
M763T938			0.335328	1.27065	0.408467	763.188	937.621	3159.84	3429.86	1827.94	1612.69	1607.97	1375.25	1662.07	1440.85	4549.16	3489.34	1420.65	3973.64	1564.39	1582.16	1744.98
M249T1375			0.428221	1.27065	0.318695	249.099	1374.94	3603	3253.69	2775.57	3488.51	2397.98	3628.09	2480.74	3340.73	4013.62	3100.07	3486.37	7907.36	3153.88	3151.52	2480.6
M661T602			0.0878947	1.27052	0.241031	660.893	602.347	245.146	399.35	638.648	488.905	694.567	675.836	472.156	660.503	914.507	404.728	908.971	631.674	1059.78	1023.64	1023.94
M486T689			0.794119	1.27045	0.439154	485.987	688.634	49112	29725.7	8319.95	51797.9	51157.1	8967.69	34489.2	9793.66	56021.9	50013.7	46098.6	56504.6	24856	25530.4	29466.9
M309T687			0.434358	1.2704	0.710494	309.101	687.099	772.589	240.359	7514.92	766.179	446.501	6507.84	6147.5	531.001	277.297	6102.63	561.428	7022.06	718.979	402.309	435.17
M1150T637			0.729778	1.27025	0.511345	1150.02	637.255	14463.6	28631	29358.4	34986.6	27361.9	38507	27066.4	67271.5	74413.8	15858.4	18259.3	17274.9	19959.4	20293.8	20292.2
M150T1342			0.260555	1.27012	0.28469	150.026	1341.81	1770.92	1515.68	1457.41	1761.75	1759.9	1974.62	1595.4	1801.95	1846.21	4149.24	1976.79	1636.78	2466.59	2324.26	2464.68
M783T531			0.48507	1.26986	0.530434	782.609	531.116	2448.04	1971.77	1944.46	6591.11	2138.3	9885.97	2081.72	4446.73	4616.95	9349.7	3864.66	7360.95	5210.85	3947.79	4010.18
M1065T695			0.193349	1.26982	0.410294	1064.97	695.251	6245.64	7013.48	7770.06	11046.3	6379.21	6589.11	7382.02	7506.02	6949.9	7885.24	20689.7	6784.41	6653.1	7274.9	6655.23
M496T726			0.285704	1.26976	0.433769	496.175	726.324	1023.82	1862.68	656.299	712.562	1205.35	2672.94	983.43	1177.41	1363.94	2266.28	1513.1	3023.61	1077.62	1195.69	1314.57
M1004T692			0.704178	1.26972	0.260063	1003.8	692.052	5845.92	11943.1	6017.19	7370.85	10837.5	16599.3	7620.98	15642.1	12412.4	13986.2	9025.73	15736	7562.72	8821.05	8836.02
M304T70_2			0.404194	1.26972	0.480889	304.047	69.848	2998.62	2568.38	3100.31	6838.5	6983.3	839.049	3110.53	8490.81	7023.54	2839.64	2557.93	5597.88	3945.74	3865.61	4504.11
M308T904			0.286898	1.26968	0.262976	308.094	903.666	1926.52	1794.58	1717.73	1965.4	1138.39	1806.32	1622.79	1689.21	1705.84	3963.07	1775.9	2383.06	2066.99	2058.93	2412.1
M837T76_1			0.594136	1.26968	0.0125469	836.507	75.64	4962.59	8997.56	7109.98	6983.63	7046.74	7528.36	8124.39	8551.16	10144.3	9920.67	8326.76	9057.75	6021.84	5991.29	5011.07
M581T300			0.291033	1.26968	0.273655	581.489	299.871	1572.91	2556.66	1625.33	1633.42	1873.79	998.704	1457.22	2880.86	1601.45	2175.53	1463.04	3449.81	1646.43	1545.87	1646.52
M299T68_1			0.191012	1.26956	0.55047	299.112	68.3795	4274.17	4479.74	1453.09	1461.44	777.625	551.808	2445.48	1443.78	4841.71	774.614	3133.39	3862.64	2143.49	2212.54	2143.41
M541T732_2			0.158676	1.2694	0.38818	541.415	731.523	1237.53	607.336	2302.55	435.602	653.29	1676.94	1060.85	1101.59	1196.91	1741.47	2124.71	1550.14	978.339	977.653	925.308
M620T335			0.455393	1.26935	0.419041	620.391	335.173	3603.11	5347.74	6538.6	1228.59	9707.67	15055.8	10401.1	4392.71	9478.1	8764.8	8807.51	10810.4	5818	5391.25	5804.29
M308T69			0.297282	1.26933	0.404799	308.184	69.439	2399.02	2493.84	963.388	1813.68	2548.64	4755.91	3484.56	3585.67	4697.54	2662.63	620.339	3956.83	2574.51	2107.6	2526.23
M384T404			0.157217	1.26932	0.440765	384.273	403.769	1617.29	218.205	1087.16	1585.79	1069.24	1518.71	1327.83	555.654	2830.53	1312.02	952.53	2029.01	1485.9	1357.09	1357.07
M137T801			0.203918	1.26931	0.551954	136.964	801.38	2163.53	1356.72	2869.9	330.544	3716.71	2358.71	3453.57	1543.15	1752.17	1905.67	6376.21	1211.45	2514.64	2565.68	2601.86
M337T523			0.337697	1.26928	0.563401	336.97	523.436	418.856	4538.21	3503.42	2913.67	2745.79	2913.87	491.857	6988.63	6292.09	2839.81	440.068	4568.29	420.755	396.543	396.002
M223T76			0.773086	1.2692	0.0986432	223.169	76.045	11877.7	7652.32	14853.6	6937.28	10361.3	11014	16378.5	12781.3	16263	11695.7	11249.3	11206.4	10183	10221.5	11088.4
M147T1354			0.194093	1.26919	0.41252	147.091	1353.56	1256	1654.9	2915.2	1478.4	1571.76	1228.1	1984.58	4405.1	1743.53	1307.81	1514.1	1869.24	1458.73	1459.27	1487.78
M399T345			0.168007	1.26911	0.59832	399.328	345.07	4290.14	1988.23	3601.63	1512.95	5533.89	6115.31	1535.59	1769.63	12900.3	2806.19	4248.45	5982.87	2343.29	2297.14	2567.7
M568T691			1.31716	1.26898	0.526765	568.49	690.73	26149.8	37297.6	64244.1	127527	121123	30680.4	116093	22759.1	127523	141082	30908.9	78137.3	79458.4	86794.4	86753.1
M305T71			0.0879731	1.26896	0.799675	305.173	71.321	988.065	2223.6	328.688	6490.7	1069.83	529.124	259.893	733.525	394.478	1280.28	11232.7	857.175	2549.46	5135.55	1871.74
M1061T690_1			1.40737	1.26879	0.402261	1060.51	689.765	17159	22200.8	35248.6	62337.5	52846	32403.9	27880.3	68872.2	25729.3	61229.7	28519.9	69688	37592.8	37651.5	30080.8
M477T39			1.14467	1.26878	0.255599	477.266	39.439	34286.7	25143	18391.9	7935.62	17686.9	22340.9	18402	29920.8	22180.6	39502.7	24429.5	25158.2	28808.3	28132.5	28729.6
M580T38			0.150305	1.26875	0.148799	580.182	38.357	600.545	770.633	967.872	615.107	1328.4	1115.64	1252.75	1246.08	1201.26	1184.74	1309.87	654.265	1148.27	1205.11	1206.18
M653T49			0.278143	1.26837	0.374964	653.44	48.646	3507.86	2694.24	4537.77	4020.5	1993.1	2139.82	2189.74	7684.21	2502.92	3409.66	4012.91	4164.29	1625.52	1472.43	1631.67
M117T1354			0.793031	1.26796	0.383965	116.928	1353.88	11510.7	5210.01	15132.8	20748.8	9287.89	21996.8	11708.2	30060	9107.64	22621.3	17309.8	15558.9	20639.1	18622	18600.4
M351T56			0.814668	1.2679	0.501071	351.251	55.813	16221.7	27945.7	1930.07	6556.51	7901.55	10824.5	12160.7	11979.1	8715.34	23475.5	11297.5	22874.7	11447.6	11431.9	9974.05
M512T728			0.395812	1.26785	0.265111	511.967	727.998	5044.12	5564.32	5009.47	1963.23	4990.92	3482.82	4987.38	3168.23	3333.37	6372.88	7501.21	7670.61	3765.9	3768.66	3466.96
M129T731			1.21888	1.2678	0.475574	128.952	730.979	169132	70691.5	374645	81392.1	369508	150933	389377	98225.8	348101	212775	331510	162033	347973	348035	313643
M361T778			1.4829	1.26756	0.205622	361.209	778.348	35355.3	87068.5	39339.6	48740	39508.3	39703	43740.8	64942.1	54772.5	61526.6	59444.7	82803.8	63460.6	61137.2	61208.7
M666T71			0.28167	1.26746	0.325679	666.374	71.24	3911.86	1750.88	896.042	984.198	3006.19	2273.68	2968.89	2353.73	1548.68	2819.62	3165.58	3395.91	2337.71	2146.23	2149.73
M684T362			0.24456	1.26737	0.483973	683.546	362.223	1535.22	4467.73	8970.45	13047.3	8973.67	5660.81	2848.82	13511	14960.9	7048.97	11207.7	4482.56	3948.02	4907.7	3982.63
M107T68			0.185327	1.26736	0.295574	107.048	67.959	1632.19	699.072	1456.24	532.705	1549.77	2143.05	1851.04	810.801	1651.1	2150.74	2183.8	1507.93	1665.97	1668.34	1786.98
M388T907			0.172835	1.26736	0.150963	388.134	906.945	906.522	664.234	978.314	666.652	663.46	779.542	645.16	783.256	1266.16	1401.7	810.556	997.438	906.3	801.065	923.654
M576T531_2			0.392603	1.26723	0.337414	576.341	530.519	5176.64	3802	7112.25	4009.57	6556.89	7910.99	11515.8	5085.24	5462.87	6601.05	11380.6	3760.61	14364.5	12374.3	14291.6
M219T621			0.830437	1.26711	0.287762	218.942	621.157	19802.1	20889.4	6760.37	11601.7	21391	7888.82	23935.8	20989.5	20171.3	18916.6	8479.06	19435.6	12739.9	10522.6	12698.4
M294T404			0.183459	1.26673	0.495864	294.1	403.656	103.567	1254.71	686.406	751.518	706.837	501.082	230.727	1174.08	361.868	1322.62	664.704	1318.11	174.988	176.337	199.951
M635T631			0.268717	1.26671	0.332771	634.989	631.067	4817.23	2426.41	2508.65	2619.43	1969.3	3009.96	4265.47	5418.16	5427.24	2308.16	2300.17	2259.55	1469.23	1467.38	1364.75
M237T692			0.803497	1.26669	0.522324	237.073	692.324	10595.9	6837.66	9456.31	17707.4	10540.2	23190	14812	9056.39	12975.2	38548.9	7439.76	16384.5	11154.6	13070.2	13076.6
M601T397			0.764742	1.26661	0.191231	600.505	397.446	14353.6	13864.5	10213.7	8634.49	11467.4	12249.7	12054.6	14121.9	14656.4	13977.2	10174.7	24670.1	5684.57	7283.93	5773.84
M810T718			0.706607	1.26655	0.268711	809.942	717.649	12837.5	13001.8	14659.6	12798.9	10440.6	7892.77	7492.51	12277.3	12522.8	25614.2	14626	18191.3	12425.9	13026.5	17611.5
M323T330			0.233499	1.26639	0.620931	323.087	329.782	1837.79	6637.05	6892.59	2736.07	6265.05	7219.08	6668.51	4469.98	18653.1	1293.72	6908.53	2008.6	1958.47	1954.26	1689.7
M390T64			0.430744	1.26636	0.297373	390.266	64.249	7879.62	6391	3109.82	1403.54	4482.62	4302.62	4291.65	5429.89	4441.57	5759.35	6914.15	8076	3796.62	3888.83	3889.7
M738T562			0.418673	1.26635	0.258231	737.564	562.175	2892.85	1175.36	3883.26	4867.9	4655.64	4771.21	4255.08	4060.6	3328.69	7312.62	4085.53	5129.04	5303.41	5272.79	5272.78
M449T72			0.787152	1.26628	0.211012	449.148	71.961	29315.1	28304.8	53457.2	46593.5	43250	45253.1	58806.6	71256.4	66696.1	24206.4	46827.8	43931	41798.2	41611.8	41798.1
M1033T693			1.13841	1.26592	0.513654	1032.99	693.415	25512.8	10716.8	38458.7	29450.8	14782	27644.6	10317.6	39116.8	17615.7	35204.3	15866.9	67419.2	51985.8	52628.3	52626.2
M808T277			5.48573	1.26584	0.341823	807.571	276.623	178177	429969	830857	1.54426e+06	795587	719707	797833	1.00065e+06	752251	1.1386e+06	900325	1.10478e+06	712939	691370	750615
M248T70			0.437903	1.26579	0.110057	248.165	70.364	4509.88	4133.95	3042.91	2622.96	2954.92	3350.74	3866.05	4080.32	3962.96	6251.95	3233.75	4699.66	1955.54	2084.55	1947.69
M409T61			0.27816	1.26577	0.370022	409.181	60.5035	1370.75	1881.35	459.136	1354.8	1407.37	1060.68	1379.33	1941.32	580.055	2383.12	969.588	2283.03	1455.77	1459.34	1685.11
M416T80			0.196169	1.26567	0.34643	416.135	79.926	505.694	731.535	1306.48	1689.66	1186.08	1411.39	1396.02	2537.15	1293.1	1448.87	1297.88	672.577	1122.01	1173.54	1121.64
M535T45			0.141929	1.26559	0.505289	534.906	44.684	1392.62	626.962	350.369	176.713	468.074	1390.1	1613.33	978.502	275.74	823.134	1136.1	747.901	589.322	486.036	589.975
M62T55_1			0.277627	1.26513	0.253447	61.7957	55.1815	1004.67	1778.37	1700.79	505.326	700.069	1770.05	1734.27	1579.43	1538.08	2028.27	1012.22	1544.65	1487.92	1482.74	1411.01
M718T374			0.6449	1.26502	0.517095	717.552	374.12	21854.4	18261.5	7540.17	23567.7	8283.8	16925	8404.62	9988.96	35460.3	40402.2	11233	16500.3	14410.8	16312.5	18181.2
M515T363			0.245959	1.26472	0.506991	515.285	363.195	2150.16	1460.7	1007.35	534.199	1593.27	914.953	1032.96	1074.46	1272.68	713.97	2013.23	3581.27	1101.12	1197.96	1189.38
M434T49_2			0.169633	1.2647	0.324861	434.031	48.778	2254.86	859.937	2271.38	1049.23	588.649	875.916	1567	1931.89	1356.66	1361.49	2230.64	1543.39	561.628	875.873	875.871
M780T725			0.190206	1.26464	0.390917	780.417	725.259	1037.24	751.815	1888.53	1718.44	2045.14	1045.48	2871.21	2412.57	605.377	1065.22	1508.57	2269.62	3347.94	3348.87	3466.89
M867T688			3.08308	1.2646	0.319758	866.98	687.52	132638	190870	472208	267193	488594	284537	461720	292698	268358	301535	420202	577347	323118	283006	283250
M469T38_8			0.387028	1.26455	0.37823	469.308	38.278	6858.08	3237.71	4118.82	2502.04	2642.45	4181.2	8860.56	3260.01	2867.83	5954.08	5154.9	3670.58	5253.05	5509.41	5232.05
M951T52			0.153309	1.26448	0.534229	951.127	51.721	2440.66	2794.75	4831.58	1071.26	1004.78	1457.42	1405.71	5221.97	1828.3	1372.33	4934.24	2434.92	1103.04	923.804	1105.7
M264T933			0.204045	1.26424	0.101493	264.048	933.306	1429.84	1245.38	1212.39	1342.51	1356.55	1403.51	2152.52	1135.58	2094.04	1237.05	1416.86	2065.41	1739.15	1397.75	1370.27
M428T58			0.236779	1.264	0.316485	428.336	57.998	1847.16	906.626	1901.11	570.594	1008.59	1133.47	889.205	1427.4	1612.95	1968.23	2310	1104.76	1431.19	1400.88	1431.9
M680T566			0.93257	1.26395	0.176899	679.51	566.342	23735.4	7435.26	29902.4	23519.7	21325.6	31386	31131.5	24590.1	19621.4	32497.3	32177.7	33527.6	30399.6	31981.5	30389.1
M453T849			0.936587	1.26387	0.157544	453.343	849.104	19907.3	22214.8	30839.7	32247.6	32385	33491.2	34810.1	56378.7	32629.8	33904.8	33206.4	25300.7	33594.5	33831.7	33623.9
M341T597			0.251352	1.2635	0.177592	340.76	597.255	1031.87	1781.1	1470.57	800.87	1605.84	888.565	1478.87	1613.48	1085.91	2271.42	1488.56	1637.57	1546.58	1543.84	1392.88
M817T295			1.13479	1.2634	0.269904	816.583	294.924	20587.5	36720.1	51585.9	32825.6	33955.1	35412.1	29664.5	50157	43736.6	29647.9	39077.6	74401.9	46924.9	48427.3	46940.7
M286T831			0.0432343	1.26331	0.72112	286.138	831.023	2781.83	2102.98	904.719	2528.25	1760.72	436.94	1001.67	1017.84	8205.97	1037.73	1186.02	835.001	865.882	1003.44	852.813
M175T524_1			0.154356	1.26323	0.458226	175.053	524.285	1187.08	1970.13	504.644	1404.56	783.543	631.955	2435.65	1297.04	1791.79	638.554	1480.17	544.936	1657.61	1790.51	1659.39
M620T611			0.114008	1.26313	0.324379	619.968	611.4	546.087	635.027	1219.31	1309.67	1981.56	941.043	1501.06	853.809	1553.71	1393.46	2089.8	986.139	1333.74	1353.81	1491.05
M497T271			0.256034	1.26308	0.149345	497.165	271.164	833.305	614.032	951.726	1425.19	865.654	1266.19	1057.95	1022.31	1106.07	1427.69	1166.8	1742.21	1695.44	1587.63	1589.53
M283T73_2			0.298252	1.26305	0.32408	282.59	72.8875	1464.48	3186.22	3110.4	1879.05	1454.39	1740.51	1761.14	2465.67	3248	4372.91	2912.51	1451.09	3338.55	3438.55	3339.26
M454T45			0.200619	1.26304	0.74483	453.985	44.58	2278.63	436.483	541.965	2718.61	885.22	298.62	218.023	887.834	5644.21	422.804	998.485	871.406	244.923	170.99	185.211
M865T671			0.747207	1.26301	0.346405	865.029	670.95	9055.36	11757.8	9161.2	18173.8	3134.42	13428.6	10091.8	20975.9	8094.98	10840.4	14179.9	17548.1	9472.36	9480.34	9111.69
M611T55			0.0954848	1.2628	0.379011	611.152	54.8525	2330.62	3073.71	1894.24	3871.68	3184.17	1113.46	3498.91	3479.13	5196.2	1125.85	4308.78	1924.03	3797.92	3774.84	3775.22
M384T78			0.279196	1.26273	0.396285	384.214	78.286	2208.84	1291.78	2127.73	1367.02	1330.06	3961.73	1509.33	1494.99	2875.68	2000.03	3823.54	3811.87	2611.32	3003.93	2996.27
M514T592			0.583941	1.26266	0.219318	514.323	592.438	2028.34	3757.18	5179.44	8172.36	6373.2	4272.29	6286.55	5475.2	5167.95	6819.31	5550.03	8306.58	8803.84	9494.58	9481.27
M716T362			0.4383	1.26262	0.3167	715.534	362.3	3086.68	9051.37	2271.25	2842.1	6285.53	4812.45	6808.46	7142.83	6909.34	6203.57	4422.15	4308.23	5534.96	5488.02	5764.83
M703T51			0.36151	1.26239	0.38309	703.477	51.083	2308.5	4380.68	5545.25	554.632	2074.98	2882.89	3555.63	2951.7	2356.74	5223.53	3490.07	4825.88	2314.86	2698.87	2727.11
M130T669			0.148998	1.26192	0.170808	130.096	668.868	668.053	371.722	326.853	514.948	738.452	643.69	822.461	761.378	735.901	590.375	392.67	815.754	1113.62	1229.06	1235.22
M711T420			0.187636	1.26191	0.271249	710.988	420.486	865.76	263.002	1461.32	1119.2	1427.23	1617.29	1550.74	1439.39	1719.42	1436.6	1663.1	713.437	1577.42	1575.55	1620.7
M575T731			0.502614	1.2618	0.241862	574.91	731.257	3793.25	3120.9	5453.61	7028.06	8152.36	6911.34	7535.53	7769.62	8310.54	9626.31	3114.17	7124.95	7046.94	6924.01	7440.6
M258T67			0.0484303	1.26142	0.707149	258.083	67.056	2490.74	1676.35	2288.87	614.157	1309.89	2545.52	1415.27	878.68	8228.38	1437.54	880.385	941.458	2287.5	2437.26	2286.94
M537T642			1.95048	1.26139	0.599885	537.015	642.377	44224.7	50873	17100.9	184194	22678.2	182131	76437.4	169870	128467	44052.1	40117	173265	186423	143565	146485
M491T49_1			0.582088	1.26078	0.448794	491.371	49.216	7940.93	14700.9	3105.62	5738.22	3644.16	4435.14	7467.68	6366.41	4916.07	13714	7401.4	10017	6300.38	6299.39	6452.01
M363T90			0.198117	1.26072	0.488341	362.758	90.4565	2499.76	320.533	9318.68	2435.59	4007.09	4164.86	3663.34	6274.94	6874.86	3436.3	4308.89	4118.7	2316.26	2317.18	2418.14
M197T687_2			0.251739	1.26061	0.258099	197.033	687.418	1483.18	1325.56	1810.17	1111.86	2040.61	1628.75	2519.14	2944.95	2491.89	1377	1136.77	1380.19	1521.61	1589.14	1592.5
M377T829			0.557355	1.26057	0.293607	376.926	829.241	5521.3	3609.57	7215.88	2232.82	7331.31	2742.69	4658.14	7544.54	4619.27	6437.07	4676.08	8184.8	5938.26	6103.48	6097.82
M1091T638			0.35642	1.26049	0.191823	1090.56	637.664	1301.7	1540.32	2962.6	3395.77	1555.27	3556.11	3003.83	3523.73	3147.14	2648.8	2584.7	3131.71	1247.39	1247.78	1168.27
M563T675			0.737407	1.26045	0.134171	562.929	674.761	3882.67	12262.9	15659.3	12194.4	16227.4	16994.6	14893.6	15380.8	17252.9	18136.1	14907.7	16762.4	18409.8	17859.3	18405.5
M557T859			0.214771	1.26042	0.153004	557.19	858.735	753.857	1680.03	747.591	669.195	951.94	944.546	1097.22	1074.22	1227	1238.39	1162.37	1444.61	796.355	797.96	895.249
M391T80_2			0.664097	1.26037	0.355289	391.211	79.644	6323.65	12585.1	13240.9	6210.67	1533.05	7954.61	9974.69	7007.79	7062.52	10281.8	11281.2	14698	5720.47	5503.89	5505.32
M214T371			0.822512	1.26022	0.239597	214.071	371.147	19446.3	7110.97	17747.1	21058.6	10863.5	17212	19215.1	19264.4	14335.5	28355.5	23801.4	12781	33339.6	39986	34466.4
M116T423			0.313002	1.25983	0.43589	116.106	423.405	7248.78	3680.46	10881.2	1271.24	7165.4	7251.68	10734.9	9613.93	11079.6	5381.68	8576.06	1855.91	2507.12	5127.42	5181.24
M833T792			0.191016	1.25974	0.271957	833.077	792.476	354.483	1037.38	401.1	668.451	885.215	1028.05	566.956	801.581	885.437	1190.84	813.118	1253.01	629.327	628.918	668.31
M685T460			0.422634	1.25967	0.180044	685.389	459.599	3388.49	4545.43	5779.55	2432.43	4321.52	4534.3	3750.63	6735.59	4085.22	4608.36	5034.65	7279.43	4662.16	4489.79	4662.85
M383T79			0.257158	1.25966	0.53171	383.17	78.955	3579.16	1366.87	1198.11	2897.31	5634.65	9099.48	2218.89	5487.27	7249.96	6541.72	6893.05	1558.22	1731.36	1650.86	1736
M915T620			0.238882	1.25959	0.0623647	914.698	620.345	1831.82	1849.37	1728.14	1461.09	1516.59	2233.96	2560.92	2383.86	2784.98	1891.79	2232.2	1524.38	1091.29	1217.5	1216.39
M819T298			0.974054	1.25955	0.212285	818.602	297.67	48100.6	78918.6	79272	67879.3	66909.5	59960.5	110395	79175.8	68013.1	45250.8	126847	75450.5	106779	119951	120360
M635T49_1			1.34338	1.25931	0.304314	634.538	48.652	48559.1	40276.4	34248	23546.5	44097.6	44858.4	28360.8	56366.3	49069	86603.8	30752.9	45522.2	51151.1	49390.3	49382.9
M934T711			0.190815	1.25929	0.332145	934.302	710.628	1231.58	497.278	818.844	1389.86	671.876	685.102	1238.77	1736.07	979.452	1383.31	679.65	650.121	458.479	457.894	532.236
M231T733			0.778738	1.25923	0.0398482	231.023	733.475	6254.34	9628.91	9271.73	7475.97	11116.1	10058	11137	8759.85	11856.5	10513.5	11855.2	13630.9	9343.32	9528.43	9342
M1175T1049			0.206161	1.25918	0.394809	1175.37	1049.38	251.513	1048.88	903.718	843.799	751.048	1847.67	847.42	1770.47	1180.02	1113.17	638.511	1560.52	754.078	812.457	752.767
M785T49			0.379061	1.25916	0.41121	784.607	48.599	5375.72	4733.24	2304.99	1958.27	1553.9	3063.05	2171.56	2994.46	2570.43	6629.61	4143.53	5400.85	2884.88	2886.5	2653.03
M336T422			0.193852	1.25898	0.301005	336.016	422.373	573.688	664.027	1112.22	668.672	1304.46	689.148	1571.74	925.485	454.887	1022.66	1349.96	985.553	1087.11	1086.38	1118.94
M791T568			0.378289	1.25896	0.278068	790.773	568.313	1170.9	4262.7	4001.53	1294.13	1918.72	3178.87	2727.84	3708.15	4094.37	3153.7	3406.67	2834.56	1807.71	2120.45	2115.67
M269T79			1.5067	1.25866	0.100332	269.211	79.3035	32736	39037.1	44300.1	16218.4	32910.1	36446.8	36335	36173.6	47977.9	52914.1	38040	42365.8	34323.9	34326.9	34603.4
M250T803			0.220961	1.2586	0.0711942	250.009	803.102	849.076	712.413	1156.63	661.647	587.934	740.247	984.328	848.3	1251.15	1004.93	896.395	940.325	632.087	576.907	632.161
M598T696			0.566791	1.25851	0.34417	597.511	695.991	5396.81	5037.22	5533.24	7230.96	5494.47	6895.77	3538.62	7861.63	5419.16	8438.52	5510.82	14019.7	5175.12	4936.9	4958.27
M1053T658			0.589396	1.25847	0.394901	1053	657.97	6525.28	6242.89	6157.35	6335.94	11626.6	7514.74	5219.04	18076.3	7273.14	6517.19	7084.91	11709.1	7624.36	6638.2	6925.45
M129T443			0.41801	1.25839	0.282445	129.019	443.142	3795.48	4593.31	1852.44	2031.78	2240.94	2083.37	3726.95	2883.2	3534.04	2627.14	2725.3	5389.33	1846.93	1954.59	1856.77
M678T79			0.252407	1.25835	0.2413	678.392	79.318	1564.41	1462.56	921.235	1114.55	586.606	914.501	778.158	1452.13	2056.5	1195.97	1453.37	1323.52	1437.37	1435.52	1560.8
M378T820			0.352266	1.25824	0.126051	378.024	819.884	1985	2200.81	1700.74	865.088	1814.64	1541.7	1802.86	1989.16	2374.64	2224.75	1540.98	2785.89	1552.68	1256.31	1255.72
M1022T1005			0.107438	1.25795	0.592649	1022.03	1004.88	930.149	399.881	676.316	119.342	307.063	661.303	185.239	132.87	805.515	503.221	738.854	1526.46	77.5239	131.271	129.341
M271T545			0.846721	1.25769	0.284102	271.003	544.942	8291.9	14571.4	20710	18945.2	25990.2	14980.1	30965.3	13080.5	21092.8	30334	19038.9	15645.4	18869.4	19169	18975.6
M515T1097			0.419089	1.25753	0.269722	515.325	1096.66	3128.83	3420.29	3297.04	2696.63	3660.83	2732.19	2704.84	3142.75	4679.3	2601.39	3706.06	6977.95	2872.47	2925	3143.09
M705T727			0.154009	1.25748	0.356647	705.417	726.951	1762.73	657.775	2337.16	1459.26	2091.32	1759.27	1834.21	529.987	2431.23	2160.78	3356.47	2347.01	1665.16	1777.86	1775.12
M434T894			0.215581	1.25739	0.283869	433.886	894.283	676.06	1542.4	1020.05	358.378	877.058	866.575	1189.05	1396.64	817.493	1026.65	772.774	1512.5	924.201	952.502	892.933
M252T198			0.407886	1.25725	0.575796	252.054	197.849	2770.42	3588.99	1732.88	3480.95	2785.02	2636.77	3567.73	2389.29	342.096	7465.48	778.444	6824.05	1528.01	1531.84	1784.57
M490T910_2			0.23652	1.25718	0.582909	490.249	909.742	1036.86	1403.38	977.649	608.834	700.079	1219.83	772.984	881.136	406.112	1513.9	633.837	3268.02	720.228	738.347	720.258
M503T821			0.18011	1.2571	0.256157	503.151	820.931	996.889	1220.46	1205.13	1038.28	614.025	1505.22	2207.51	1660.54	1297.59	1143.16	1154.33	808.604	1686.55	1688.24	1751.93
M514T362			0.40913	1.25693	0.527497	514.283	362.421	6367.74	4154.16	3079.6	1400.9	3653.44	2343.06	2924	3201.66	3285	1900.49	5178.12	9904.98	1379.01	1452.66	1380.76
M317T403			0.240598	1.25675	0.549905	317.211	403.011	7229.73	10523.7	5884.94	4777.79	6690.59	2213.32	5844	4167.54	19312	6552.76	5146.12	5879.74	1234	1285.38	1282.58
M761T707			0.347542	1.25663	0.145435	760.939	706.607	3313.22	3852.98	2692.64	3994.75	3625.4	2028.87	6095.38	3295.75	3514.07	4245.33	3389.16	3974.39	3741.47	3958.9	3741.73
M305T367			0.176596	1.25654	0.307632	305.174	367.066	422.783	212.482	826.495	820.579	670.11	1043.65	946.936	343.002	858.2	965.392	940.369	967.356	721.369	523.995	716.624
M93T59			0.19659	1.25652	0.219582	93.0678	58.897	1543.1	1578.63	1586.06	1522.95	1055.64	1409.03	1694.8	2976.61	1419.52	997.789	1891.33	1945.9	1235.88	1203.67	1186.48
M324T882			0.404703	1.2565	0.471512	324.045	882.427	8199.4	9424.57	5234.53	5353.98	5544.65	6383.27	6239.12	18839.9	9344.23	5407.82	5372.22	5233.24	5111.21	5215.42	5112.78
M869T682			0.978566	1.25643	0.361026	868.985	682.105	10157.6	23373.9	18346.8	33368.2	22918.8	24423.6	7185.8	41763.3	23570	34760.2	23873	35436.7	22961.1	20509.2	22949.4
M751T730			0.655758	1.25636	0.1649	750.897	729.855	9106.08	12732	20781.2	19981.7	23521.8	8563.96	21853.5	17395	19659.8	20125.1	20014.9	19912.7	24216.5	23450.8	23417.8
M640T672			0.0934661	1.25634	0.455241	639.877	672.078	21.0012	138.313	570.512	325.931	452.898	299.621	470.333	314.616	134.309	502.928	467.247	382.383	394.052	391.586	403.295
M484T77			0.383475	1.25633	0.150476	484.28	76.988	1690.28	3868.29	3344.2	4343.44	3038.86	4212.52	3840.97	2754.89	4070.23	5328.99	4501.53	5255.06	3894.66	3893.32	3985.5
M908T637			0.864854	1.25625	0.191907	908.071	636.688	19640	9729.64	12982.6	9645.97	9103.23	14977.2	9366.86	19333	15631.4	15453.4	15202.3	20586.6	6266.04	6504.23	7121.02
M430T757			0.235933	1.25624	0.289421	430.16	756.674	528.125	565.503	1019.58	1932.92	1301.35	1442.73	1440.57	1188.26	1252.64	1741.45	1027.47	1879.73	2175.56	2392.1	2145.26
M307T523_1			0.653221	1.25608	0.449108	307.043	523.295	16308.7	15804	32038.4	17434.6	32674.6	29087.1	61294.7	36128.5	28678.8	19691.3	20147.7	14114.2	25643.5	26294.4	25878.3
M252T100			0.32033	1.25604	0.608918	251.969	99.9375	4109.77	5397.19	2415.84	328.171	1305.21	1246.55	7036.06	1112.7	1822.86	3861.96	1506.67	3252.65	2740.87	2741.18	2805.04
M857T47			0.164065	1.25584	0.563577	856.743	46.823	451.628	2128.67	382.487	544.637	458.546	621.045	593.93	992.653	430.944	1550.78	1368.39	823.85	756.594	757.887	723.9
M682T878			0.155308	1.25564	0.239811	682.292	877.84	621.276	683.945	1042.87	516.875	277.935	645.729	585.006	781.014	762.718	765.743	700.435	1162.25	991.446	993.883	993.893
M685T363			0.249763	1.25561	0.463843	684.546	363.257	250.653	1139.36	6743.19	6502.18	4813.37	5199.54	3884.43	7191.46	7466.79	5213.31	4819.29	2373.27	4392.78	4403.22	4596.48
M570T519			0.222378	1.25546	0.526597	570.339	519.02	697.97	2635.4	960.21	686.287	977.963	1141.99	993.897	1175.14	504.368	1556.9	1666.03	3017.23	1069.61	1171.82	1065.97
M356T602			0.21344	1.25543	0.298026	356.144	602.294	994.299	978.571	571.86	1269.08	892.509	847.276	906.091	1053.68	932.536	1233.03	766.9	2079.94	527.626	472.072	527.368
M445T82			0.448847	1.25532	0.33193	445.244	81.724	2414.21	4141.43	4235.41	1454.29	3907.56	6988.91	3283.6	5781.11	6407.26	3638.36	3776.22	6163.85	3894.09	3606.87	3890.82
M389T572			0.294789	1.25523	0.338498	388.91	572.053	1129.77	780.464	2747.06	1971.97	1878.61	2208.79	2629.77	1466.76	921.65	2935.15	2965	2533.62	1063.54	1144.48	1213.28
M908T713			0.883474	1.25507	0.215034	908.483	712.836	11960.5	16886.7	18534.3	9660.12	25055	15425	17060	26322.5	14865.4	21089.3	15669.2	27390.6	16659.6	15168.3	16644.7
M518T300			0.282306	1.25498	0.389987	518.143	299.703	893.572	2375.69	3213.59	2841.23	4232.54	3634.66	2617.96	2646.9	6234.95	2199.38	4965.84	2909.75	1578.92	1581.87	1143.4
M701T1030			0.352716	1.25466	0.453191	701.492	1029.69	5321.78	6842.41	6644.36	7381.83	10755.1	13888.4	9352.93	20916.1	14475.1	6071.28	6168.4	6795.62	6463.83	6111.87	6116.75
M283T750			0.237362	1.25466	0.145344	283.083	750.149	923.049	1578.67	1435.59	1276.59	1436.76	1384.88	1547.95	1080.22	1563.66	1623.73	1721.38	2544.95	1696.47	1734.82	1696.75
M242T55			0.547648	1.25461	0.649067	242.176	54.885	23830.9	7308.34	5567.25	2968.94	6963.87	6170.43	6133.73	9176.96	6378.7	29130.7	8979.54	6456.02	15350.6	17440.4	17412.1
M535T51			0.283921	1.25454	0.465598	535.353	50.5145	6615.67	2164.08	5745.99	926.272	1217.99	2765.52	4618.68	5410.07	3364.74	2195.08	4953.05	3841.05	2285.74	2854.56	2813.6
M495T852			0.189982	1.25448	0.133775	495.179	852.194	693.581	441.887	919.739	534.673	714.182	518.256	883.463	806.647	577.182	1066.52	790.007	671.21	1059.95	1223.12	1071.17
M964T1228			0.503314	1.25435	0.499097	963.727	1228.46	3480.86	8441.47	2255.65	3234.16	4013.65	10865	9942.7	7864.59	1846.21	6334.73	4190.45	10325.2	2699.55	3067.64	2692.91
M597T694			13.0369	1.25435	0.363796	597.01	694.034	3.33369e+06	1.80414e+06	4.83065e+06	2.41611e+06	4.63591e+06	3.73744e+06	4.02253e+06	6.56348e+06	1.86058e+06	4.96005e+06	2.45866e+06	6.17236e+06	2.48814e+06	2.09013e+06	2.49544e+06
M437T838			0.197824	1.25392	0.325099	437.174	837.583	883.685	1179.43	970.781	963.665	1031.81	1045.84	2343.61	1036.7	1434.6	964.651	581.578	1256.67	965.723	1002.83	1070.7
M261T75_2			0.611486	1.25391	0.217723	261.221	74.566	9100.03	7511.02	8993.87	2491.69	9876.03	14867.8	10981.8	11966.3	9942.75	11387.3	9417.89	12561.2	8717.93	8717.42	9196.6
M247T553			0.186357	1.25387	0.182692	247.062	553.021	663.243	610.085	675.54	633.347	801.223	476.148	1174.2	810.092	908.603	503.176	518.342	925.021	534.233	538.161	570.809
M463T810			0.127266	1.25385	0.294724	463.042	810.37	505.686	1108.27	915.382	361.744	820.15	652.637	1257.34	704.647	1278.6	673.501	965.674	591.87	684.224	709.95	708.872
M354T67			0.40985	1.25379	0.138445	354.131	66.87	3549.96	2817.26	3817.8	3324.66	1897.94	2082.44	3659.33	3725.98	4239.18	3096.34	4732.38	2475.65	2312.93	2594.98	2599.43
M719T179			0.29422	1.25377	0.47208	719.487	179.185	652.263	137	2793.31	2247.72	1219.06	1805.55	1401.05	1976.35	972.074	1862.39	1788.9	3101.28	1412.18	1379.61	1559.94
M851T620			0.149204	1.25375	0.329406	850.697	620.259	850.773	1547.14	1803.78	1020.82	1424.03	1892.04	2843.61	1775.62	1631.76	1343.86	2394.14	716.265	1140.68	1182.91	1139.21
M627T735			0.308797	1.25374	0.35686	626.882	734.703	1704.4	1848.42	4240.29	6144.97	4349.08	2402.11	2575.2	5798.58	4204.52	6029.56	3970.05	3361.01	7745.52	7746.26	7928.35
M551T675			0.459918	1.25343	0.177304	550.948	675.332	1609.9	5361.58	5408.27	5928.75	5046.7	7042.37	7015.52	5581.8	5435.04	5553.52	6134.22	8381.12	7469.26	7469.54	7741.15
M295T74			0.591437	1.25341	0.753324	295.189	74.459	19487.7	17175.4	947.237	391.504	857.914	819.829	470.763	15212.5	941.328	20627.1	12115	368.223	5644.79	2642.32	2694.9
M573T324			0.349016	1.2533	0.622028	573.336	323.628	1929.17	1099.14	9929.25	3485.55	9261.49	23108.9	19532.4	8707.54	13490.3	5358.11	4746.17	9343.41	3545.57	3537.02	3561.83
M664T731_2			0.241425	1.25325	0.147424	664.418	730.684	1669.63	843.958	2515.86	1270.85	2489.7	2274.56	2448.35	1962.78	2213.02	2543.13	2480.69	2218.69	1637.25	1638.22	1732.57
M429T81_2			0.37127	1.25305	0.272957	429.248	80.944	1433.91	3624.88	2978.11	3370.09	2521.45	4290.17	4111.96	2309.58	5033.27	2215.78	3974.49	5183.76	1145.84	1244.61	1243.96
M195T976			0.903348	1.25293	0.133068	194.905	976.281	17953.8	8020.64	17348.6	19314	13073.8	13895	24349.4	14029.8	21493.4	16235.3	19702.5	16459.4	20760	17986.5	18203.4
M841T321			1.40635	1.25282	0.406526	840.572	320.523	49664.5	32187.7	23477.4	14995.2	39960.6	61485.9	38317.3	47659.9	35194.8	79820	21196.1	55651.1	22142.6	22180.4	23449.6
M335T77			1.11614	1.25264	0.783075	335.183	76.974	91475.3	6461.61	103957	1454.09	1211.88	2527.32	91685.1	23944	136583	2569.4	2190.96	2433.01	38983	38772.2	6434.57
M186T583			0.175447	1.25263	0.250838	186.052	583.061	535.13	671.723	970.686	1006.26	1122.09	456.364	968.413	685.431	635.487	1301.89	1048.92	1325.21	506.007	523.657	523.493
M254T75_3			1.22843	1.25256	0.0708782	254.42	74.928	15125.9	17012.4	29473.4	25785.3	31050.9	31296	30813.2	27456.4	35188.1	31797.7	29874.4	32432.8	32642.4	32657.4	34361.9
M488T364			0.423863	1.25248	0.309323	488.308	364.027	5440.81	8548.59	9946.61	12244.8	10333.1	7031.57	13558.7	19198.5	10087.8	8520.77	8956.02	6742.6	9940.76	11100.6	11106
M879T78			0.779315	1.25245	0.156594	878.568	77.546	25191.1	20550	21263.3	13895.6	24068.3	14368.6	19386.3	20081.9	36470.2	23907	21678.7	27940	13623.6	13773.7	14462.9
M595T663			0.350334	1.25237	0.210035	594.985	662.969	1868.42	2250.9	2859.35	2836.27	2318.22	2098.29	2901.18	4847.69	2774.9	2640.56	1740.39	2918.38	2935.32	2895.96	2934.38
M679T334			0.647615	1.2523	0.442973	679.463	333.947	6432.21	6629.55	7723.97	5032.75	6919.93	20639	7100.76	14235.5	7562.98	13663.4	8940.14	15341.6	5512.53	6315.31	6324.93
M792T68			0.374252	1.25216	0.253587	791.52	68.322	5514.14	6492.4	2097.67	4138.68	2572.16	2083.73	4943.47	4399.57	4622.8	4762.55	5682.96	4261.5	5623.04	6044.19	5677.27
M400T56			0.280531	1.25194	0.638623	400.286	55.9835	9285.86	3992.9	3667.11	7207.19	2951.23	12379.5	1582.22	1394.78	14692.6	1226.16	14513.4	16022.3	1499.57	1589.58	1494.1
M220T76			0.480688	1.25173	0.511074	220.027	76.232	4515.16	15676.3	9656.27	697.874	6968.14	7747.52	13231	5066.98	9752.68	8186.82	16108.6	4308.79	7230.78	7219.57	6866.86
M398T829			0.441812	1.25165	0.283327	397.888	829.481	2421.29	5527.37	2162.02	2059.97	5074.17	4399.65	4961.71	4945.43	5287.87	5226.69	2194.11	4475.51	3343.82	3346.28	3910.65
M406T862			0.391434	1.25153	0.0832779	406.131	862.257	4027.69	3616.22	3913.91	3102.52	2964.55	4977.17	4812.23	5332.35	6106.12	4660.31	3390.41	3985.81	2980.71	2988.15	3084.57
M307T74_3			0.604903	1.25142	0.138403	307.262	74.224	12443.1	11709.4	15327.4	4501.25	13004.4	14584.5	16937.5	11963.8	16797.2	11802.4	15655.5	16407.6	8470.99	8727	8757.05
M924T47_2			0.0737744	1.25131	0.56878	924.266	47.46	1277.18	994.675	173.01	773.226	643.54	2668.26	1528.11	554.716	2383.06	1199.04	1965.75	540.249	2192.78	2197.3	2117.63
M195T491			0.377253	1.25119	0.409655	195.044	491.35	2596.57	5095.01	2425.74	802.601	2744.7	1781.45	3596.08	5236.01	3540.21	2224.65	2317.65	2411.35	1602.59	1789.45	1784.62
M452T731			0.17666	1.25112	0.395548	451.906	731.278	646.837	196.77	1505.82	1871.25	1694.01	2418.52	2435.54	1792.15	1352.1	2026.86	1810.73	1008.42	2258.49	1903.43	1887
M804T310			0.367182	1.2511	0.498097	803.594	309.88	4540.7	5464.14	4653.85	18704.7	8717.16	1485.01	8302.75	7334.95	12149.2	9799.98	7124.25	9793.8	9716.58	9927.18	17106.5
M300T153_1			0.178614	1.25105	0.481232	300.092	152.915	1532.62	2074.61	2527.81	5679.07	3174.11	2412.58	3253.17	5858.81	6217.55	2390.86	1527.73	2521.11	1599.69	2166.83	2098.84
M429T79			0.329086	1.25095	0.311907	429.298	79.0985	1944.41	3225.93	1947.19	1837.25	3974.91	4360.76	4349.46	1904.47	5125.55	4407.06	2645.47	3197.47	2404.75	2424.93	2137.31
M273T79			0.550369	1.2509	0.29525	273.085	78.955	2272.99	3780.97	6149.2	2825.44	6078.81	6680.76	5560.37	6231.75	5747.27	7078.21	2609.75	7532.81	4027.14	4027.08	3589.81
M822T260			0.483772	1.25089	0.437006	821.565	260.017	2461.62	5856.75	4070.14	4874.4	1607.67	4621.44	2097.44	6373.85	3071.28	4748.14	4028.46	9066.84	5625.36	5628.75	5394.67
M713T473			0.448059	1.25074	0.263541	713.473	472.78	2664.51	1152.31	3628.75	4419.99	3237.84	4583.57	2887.9	4136.34	3787.74	5406.95	2948.41	5456.04	4043.32	3951.85	3955.69
M616T730			0.316373	1.25058	0.333211	615.911	730.079	3169.26	1901.45	5168.54	8188.26	9263.45	7111.54	8742.54	8068.12	5742.33	7740.1	9178.56	4051.57	7776.91	8073.32	8377.49
M335T68_8			0.53121	1.25029	0.32221	335.294	67.78	7076.29	6804.53	3594.28	3348.86	4191.44	3465.21	3753.56	4543.3	7620.05	6374.3	4072.89	9245.02	4353.38	4445.42	4353.25
M126T55			0.47299	1.25029	0.200886	125.899	55.11	2987.51	5947.06	4072.94	2793.95	5557.12	4766.54	6912.91	2939.63	5865.92	6723.7	5084.01	5137.73	4337.73	5018.39	5031.58
M309T576			0.375705	1.25025	0.618569	308.848	575.991	78.8242	4880.48	6146.54	7770.39	3751.19	4606.57	445.884	12661.4	7571.11	4941.25	444.966	7984.7		22.8075	22.401
M720T300			0.530613	1.25018	0.155399	720.492	300.408	10402.4	5067.38	6352.84	5511.68	11218.8	7659.23	11884.2	8388.87	8698.54	8642.94	8485.06	11673.9	4403.83	4657	4495.57
M334T935			0.134654	1.25016	0.490511	334.034	934.722	988.097	1848.55	775.974	468.745	733.758	1170.36	1207.69	1488.05	2422.65	816.337	1232.18	315.921	649.133	621.761	621.69
M831T363			0.254624	1.24999	0.408918	830.506	362.902	1003.79	868.525	4214.11	1504.55	1309.37	2275.69	2338.46	2051.05	2193.84	2022.15	3159.95	2204.54	1426.41	1425.92	1479.55
M742T785			0.66452	1.24971	0.0708688	742.205	784.744	7597.02	10281.5	13775.7	13799.7	14597.2	13827.9	18845.3	16610.4	13372.9	16938.1	14380.5	12180.4	16866.9	17294.4	17275.6
M424T371			0.259505	1.24936	0.488515	424.152	370.84	990.215	2265.88	884.052	948.632	620.934	893.288	724.343	2075.98	884.364	1702.82	598.519	2263.49	583.626	587.357	583.655
M419T829			0.385447	1.24926	0.287199	418.882	829.149	3750.96	2754.66	4040.25	465.621	4102	4366.49	4256.19	4196.28	5629.07	2624.16	3815.42	3814.46	3459.37	3734.7	3711.76
M863T637			0.63672	1.2491	0.256121	862.506	637.162	3757.03	6147.01	6522.09	6433.3	7589.39	6245.43	7672.4	5741.48	4575.41	10029.7	5904.06	11911.8	8150.6	8011.28	10699.2
M602T786_1			0.201544	1.24877	0.134075	602.103	786.467	863.229	620.016	1461.27	914.264	1017.16	781.836	1186.39	1106.46	1067.06	1392.56	887.126	1425.68	1067.61	956.185	934.679
M849T47			0.271148	1.24865	0.369155	848.68	47.472	1489.51	2402.44	921.477	1916.14	1386.57	1152.36	1464.65	2010.37	1285.16	1998.28	1298	3516.62	1387.28	1269.06	1387.04
M393T72			0.311804	1.24849	0.30431	393.086	71.897	6780.51	5983.4	13915.7	11613	10802.4	10817.4	16199.4	15563	16801.1	4429.78	10884.3	10922.5	10666.9	11180.4	11177.1
M104T469_2			0.176955	1.24841	0.359342	103.953	468.783	766.519	1387.37	873.972	422.248	614.502	378.812	1167.33	1267.92	997.033	727.184	903.146	484.599	653.798	653.893	664.334
M823T870			0.216328	1.24835	0.469041	823.161	869.697	728.42	2135.31	1502.52	782.328	1788.97	1748.9	1793.94	3463.78	1052.74	2397.06	1542.36	593.824	1484.74	1541.29	1619.41
M595T38			0.27333	1.24828	0.0311762	595.174	37.737	1713.28	1447.15	2278.02	1873.93	2212.91	2460.65	2565.54	2657.8	2360.34	2849.56	2543.23	1985.29	2467.44	2424.2	2458.67
M109T1371			0.240523	1.24819	0.35712	109.075	1370.66	1628.83	2296.3	2115.79	1703.61	2182.99	1046.07	3819.71	1717.88	1893.21	1574.11	1298.54	3393.71	1766.25	2032.49	1772.59
M492T635			0.563082	1.24817	0.409141	492.301	634.852	11060.8	6824.07	7853.34	5381.47	10144.4	9687.5	3564.53	9845.89	10486.4	9584.19	9354.79	20760.6	10886.6	10598.7	10612
M669T732			0.661028	1.24807	0.121244	668.893	732.437	7306.24	11228.9	13994.8	19733.9	12448.4	19064.5	17442.8	18716.5	19703.9	15552.4	16947.2	16196.7	22379.9	22222.6	22774.9
M415T636			0.354185	1.24801	0.14972	414.761	635.538	4226.1	3473.92	4130.96	1403.18	3373.29	3846.66	5227.67	2760.52	4581.71	4565.5	4258.32	4133.14	4033.56	4214.13	4213.81
M412T599			0.260522	1.24786	0.348145	412.171	599.243	790.202	1835.78	1003.14	764.323	1170.07	2050.11	1264.38	2161.98	794.331	2054.81	1235.99	1989.24	1010.23	972.161	971.262
M246T78			0.461699	1.2478	0.450748	246.241	77.8585	1110.76	4080.24	8093.79	12949.6	5395.26	5519.59	7557.11	5291.5	5759.02	6494.27	8918.26	12334.6	2826.98	2611.61	2597.26
M424T61			0.216782	1.24764	0.532643	424.145	61.16	1222.18	1688.24	3006.64	1277.38	475.488	1416.08	691.624	3856.1	1792.16	983.437	2482.14	1530.57	1051.13	972.153	973.278
M480T610			0.152979	1.24758	0.214681	479.889	609.549	757.187	958.763	753.361	446.401	782.507	1053	740.487	1390.88	1333.44	738.613	831.137	892.976	827.984	831.724	877.689
M737T268			0.155226	1.24756	0.603598	737.427	268.12	656.071	176.374	925.372	779.115	668.225	2081.48	1034.08	2636.82	714.624	813.457	680.921	715.484	1067.75	1115.86	1116.14
M703T305			0.431012	1.24747	0.277768	703.463	305.015	7510.42	6389.58	10091.5	4982.18	8481.41	6743	12335.3	11901.9	12498.3	5956.44	4863.46	7580.55	6012.38	6007.39	6024.98
M690T78			0.23497	1.24734	0.301185	690.389	78.284	1124.85	1402.63	815.967	530.737	773.679	1842.17	793.557	1325.8	1652.42	1752.08	1082.28	1489.14	574.941	575.436	639.588
M318T78			1.48305	1.24728	0.162136	318.213	77.951	33921.8	35236.8	54415.5	14582.5	40764.9	47605.3	47992.1	45852.5	57166.2	49724.3	37843.4	43963.5	30843.7	31273.7	31759.9
M437T703			0.17879	1.2471	0.367312	437.003	702.856	453.09	1283.95	645.393	1629.83	635.821	762.495	1162.09	645.276	1292.97	1270.79	770.808	1605.59	982.313	1035.22	981.416
M463T80_1			0.341635	1.24708	0.143376	463.126	80.255	1074.63	2431.37	2446.2	2889	1405.79	2593.19	2486.88	3198.18	2249.72	2685.99	3024.89	2367.07	2233.86	2166.43	2161.51
M1097T642			0.673418	1.24706	0.270651	1096.53	641.743	6943.69	6815.45	9695.38	15404.2	6521.94	9570.51	7435.96	13874.4	8576.63	12952.9	15987.3	9700.21	10207.2	9639.26	10199.8
M183T896			0.18522	1.24663	0.347849	182.986	895.785	839.991	1108.81	1390.32	738.662	631.99	779.398	816.774	1021.02	669.907	2038.5	1267.56	1029.22	1240.48	1107.21	1095.56
M440T816			0.383697	1.24625	0.220112	440.036	816.37	2183.83	3483.8	2549.84	902.23	2124.6	1357.06	3074.04	2397.85	2702.87	2438.59	2914.31	2176.85	1996.55	2243.35	2241.15
M271T621			0.0998309	1.24625	0.183211	270.941	620.984	187.712	67.6514	210.479	230.642	230.324	237.399	201.936	333.519	223.94	195.619	239.472	256.401	91.4004	110.712	158.871
M971T658			0.517598	1.24619	0.429487	970.994	657.552	9855.21	4536.52	10251	11634.4	6096.21	5719.77	13214.8	15076.1	12908.8	943.022	9504.53	8285.73	11038.4	9509.83	9676.11
M143T1318			0.46485	1.24614	0.20832	143.107	1317.56	4136.49	4417.89	4411.31	5182.07	4268.34	4779.63	5105.39	4580.54	9389.73	4565.43	3952.1	6296.55	4404.96	3841.81	4355.77
M809T75			0.391528	1.24611	0.357282	809.479	74.7285	3301.77	9114.24	5684.57	1698.85	7207.14	4794.91	4939.43	3394.73	7576.78	7715.95	7767.62	8233.62	6969.82	7075.25	6969.07
M197T260			0.197836	1.24575	0.259868	196.841	260.17	152.187	1091.02	598.12	1108.14	1015.82	1114.49	1116.63	1047.66	1130.83	1196.23	1106.61	730.15	817.364	921.758	922.378
M518T392			0.734319	1.24571	0.473823	518.321	392.012	24932.7	7656.16	14951.8	14317.9	14250.3	15957.3	16198.4	20945	11897.9	12219.2	12767.4	40660.1	19555.3	19264.7	19565.1
M141T719			1.96353	1.24564	0.254859	141.017	719.278	79734.4	23661.3	113436	116301	79907	83802.9	125150	135572	100279	92522.7	67928.3	97434.9	64460	88048.3	88759.9
M967T681			0.645477	1.24564	0.30325	967.023	680.743	3888.19	7570.58	6421.08	14873.6	12084.5	9913.57	10710.5	8355.78	9023.72	16223.7	9805.39	14081.5	10241.7	10189.7	10094.6
M121T909			0.384314	1.24548	0.215822	120.965	909.146	4624.93	4990.79	2003.41	2308.23	3868.24	2098.13	3440.98	4202.79	5037.48	4509.26	3217.3	4369.33	2632.78	2769.73	2770.79
M270T541			0.169452	1.24538	0.360647	270.028	540.519	339.609	1348.85	915.907	640.376	616.398	568.196	1256.96	975.414	1096.64	732.607	1042.49	412.083	712.57	813.758	720.174
M314T704			0.393535	1.24502	0.202208	314.028	704.114	3830.8	1544.53	4615.55	3878.35	5518.45	4372.23	5424.77	5811.63	6053.48	3910.25	5154.58	3226.99	4749.73	5171.71	4886.35
M461T895_1			0.260866	1.2447	0.369898	460.823	894.509	1123.52	1682.77	2095.38	1361.27	2146.55	2569.77	1852.83	3761.38	2336.36	1582.12	969.674	3163.55	1790.61	1777.55	1883.76
M652T71			0.448438	1.2444	0.418543	652.396	70.694	5313.28	7005.91	3922.58	3127.84	2509.62	4208.43	5010.8	3713.98	2748.28	6000.49	4723.86	10266.2	4714.12	4714.47	4771.44
M337T893			0.782458	1.24424	0.142499	336.894	893.355	9888.06	14932.9	13487.3	5493.07	11702.9	13740.8	12391.2	17156.1	12758.2	16234.1	10961.5	16656.5	10953.1	9843.77	10954.5
M674T368			0.235718	1.24415	0.491841	674.386	367.731	2775.97	3221.21	10891.9	8403.54	6254.99	2423.26	3717.52	7086.28	12723.4	4116.51	6776.76	7844.41	3038.08	4240.96	4231.46
M626T395			0.874119	1.24407	0.286737	625.518	394.999	36147.2	35625.5	20193.7	35356.2	22667.5	18779.6	10838	46743.7	37286.2	38575.2	37106.2	39411.8	13484	13494.6	18683.3
M317T893			0.353292	1.24376	0.053776	316.906	893.155	2762.96	2458.79	2959.82	1699.67	2259.4	2000.02	2955.91	3225.52	2416.4	3198.8	2376.06	3414.96	2198.37	2583.44	2552.01
M657T830			0.322111	1.24371	0.258832	656.724	829.934	1540.95	2014.65	2448.92	874.253	2066.16	2168.37	3049.78	3033.26	1996.25	1666.23	1348	2728.18	1931.27	1927.84	1701.62
M726T306			0.312894	1.24357	0.457696	725.52	305.635	526.45	523.874	2146.92	2392.62	1549.64	2850.04	775.029	2824.48	1426.46	2680.59	1976.93	2739.18	2703.04	2768.85	2767.98
M543T387			0.158447	1.24335	0.545278	543.326	387.08	4953.83	4616.25	4088.2	2705.03	12435.8	3300.78	3695.86	3930.83	9372.03	2655.33	11211.1	9046.39	1536.52	1542.04	1643.72
M357T629			0.319781	1.24327	0.286873	356.854	628.766	3687.44	4107.53	3233.83	1667.03	3569.51	3230.53	6964.17	3551.92	4057.25	2679.02	3628.89	3357.47	2492.94	2492.31	2326.68
M884T680			1.21911	1.24316	0.722257	883.971	680.18	7881.51	15005.8	44595.7	4132.07	56317.8	73961.5	10064.5	96582.9	11873.9	15728.9	9636.38	107101	44568.4	44921.4	30663.3
M746T422			0.173729	1.24297	0.430142	746.268	422.094	1155.07	208.208	1404.17	92.5863	1280.91	872.818	1264.29	738.949	1233.98	1103.6	1116.25	774.897	762.765	803.799	763.64
M432T73			0.337602	1.24276	0.31311	432.346	72.72	8588.98	8018.41	6683.7	7460.43	7270.18	4824.08	5036.13	5815.84	14017.9	6234.26	9627.27	12515.6	5802.38	5265.01	5323.51
M347T716			0.157527	1.24276	0.412033	346.989	715.708	248.214	488.468	633.904	764.438	579.394	318.562	990.805	393.366	426.817	395.756	559.879	1002.63	564.499	817.754	579.388
M407T48			0.789095	1.24274	0.55777	407.315	47.615	5961.93	12172.4	8092	6808.69	19594.8	19965	10420.2	16312.4	5022.79	13101.3	11274.6	34084.9	12860.9	13210.7	12857.6
M696T302			0.561769	1.24269	0.277888	696.493	302.028	11570.3	8999.53	12378.5	15682.9	9598.31	13637.1	11633.5	25403.7	12729.2	9569.08	13111.3	16861	5307.27	8702.59	8601.71
M835T196			3.48265	1.24266	0.614894	834.598	195.617	215192	382855	559856	2.17519e+06	2.86755e+06	2.00952e+06	2.74346e+06	3.02512e+06	466442	841302	2.21979e+06	906304	1.55956e+06	1.55022e+06	1.26093e+06
M651T634			0.212511	1.24212	0.0925372	650.649	634.432	1795.28	905.934	1482.47	1202.59	1226.45	947.616	1960.01	1462.39	1547.2	1654.74	1421.33	1345.2	1634.13	1633.66	1613.77
M178T581			0.168521	1.24197	0.540553	178.008	581.191	231.74	720.038	478.688	1847.45	756.043	769.381	582.225	1317.1	1035.76	508.251	705.663	1816.62	72.1855	73.7676	90.5782
M203T787			0.743758	1.24172	0.445536	203.052	787.312	7342.07	30695.6	9546.77	8440.25	16028.5	17939.9	13338.7	18228	25456.2	17417.2	9666.24	27639.3	11360	10570.2	11346.6
M285T639			0.273711	1.24168	0.277715	285.122	639.25	963.852	831.931	1862.11	2663.36	1915.73	2380.97	2767.91	1908.29	1912.76	2250.08	1487.24	2857.81	1694.32	1690.51	1760.62
M626T74_1			0.19218	1.24168	0.260158	626.379	74.2685	2215.95	1132.87	926.03	2250.82	829.185	2181.01	2269.72	2396.4	1690.36	1928.28	2148.3	1407.39	1521.37	1797.51	1536.13
[truncated: 15,771 more rows]

## Sheet: down-metabolite & description
name	adduct	description	VIP	Fold change	p-value	m/z	rt(s)	ctl-1	ctl-2	ctl-3	ctl-4	ctl-5	ctl-6	LDHA-cko-1	LDHA-cko-2	LDHA-cko-3	LDHA-cko-4	LDHA-cko-5	LDHA-cko-6	QC-1	QC-2	QC-3	KEGG.ID	HMDB	CellularLocations	SuperClass	Class	SubClass	DirectParent
[truncated: 433 more rows]

[truncated: 2 more sheets: down description&VIP>1, VIP>1&P<0.05]
