# Supplementary material for: Ldha-Dependent Metabolic Programs in Sertoli Cells Regulate Spermiogenesis in Mouse Testis
Source: Biology (Basel). 2022 Dec 9;11(12):1791. doi: 10.3390/biology11121791 (PMC9775226; doi:10.3390/biology11121791)
Supplement: Supplementary file 1 [file biology-11-01791-s001.zip › Supplement excel S6 up-pathway in the Ldha-cKO and control sperm.xlsx]

## Sheet: Sheet1
	Total	Expected	Hits	Raw p	–log10(p)	Holm adjust	FDR	Impact
Linoleic acid metabolism	5	0.04	2	0.00048	3.32	0.0403	0.0403	1
Glycerophospholipid metabolism	36	0.26	3	0.00182	2.74	0.151	0.0763	0.18
alpha-Linolenic acid metabolism	13	0.09	2	0.00362	2.44	0.297	0.101	0.33
Galactose metabolism	27	0.2	2	0.0154	1.81	1	0.324	0.07
Biosynthesis of unsaturated fatty acids	36	0.26	2	0.0267	1.57	1	0.448	0
Starch and sucrose metabolism	15	0.11	1	0.105	0.98	1	1	0.05
Glycerolipid metabolism	16	0.12	1	0.111	0.954	1	1	0.04
Sphingolipid metabolism	21	0.15	1	0.144	0.843	1	1	0
Arachidonic acid metabolism	36	0.26	1	0.234	0.63	1	1	0
Amino sugar and nucleotide sugar metabolism	37	0.27	1	0.24	0.62	1	1	0.04
Arginine and proline metabolism	38	0.28	1	0.246	0.609	1	1	0
Fatty acid biosynthesis	47	0.34	1	2.95-01	0.53	1	1	0
