# Supplementary material for: Ldha-Dependent Metabolic Programs in Sertoli Cells Regulate Spermiogenesis in Mouse Testis
Source: Biology (Basel). 2022 Dec 9;11(12):1791. doi: 10.3390/biology11121791 (PMC9775226; doi:10.3390/biology11121791)
Supplement: Supplementary file 1 [file biology-11-01791-s001.zip › Supplement excel S7 down-pathway in the Ldha-cKO and control sperm.xlsx]

## Sheet: pathway_results
	Total	Expected	Hits	Raw p	- log10(p)	Holm adjust	FDR	Impact
Galactose metabolism	27	0.251	2	0.024674	1.6078	1	1	0.0338
Phenylalanine, tyrosine and tryptophan biosynthesis	4	0.037185	1	0.036705	1.4353	1	1	0.5
Pyrimidine metabolism	39	0.36255	2	0.048879	1.3109	1	1	0.12249
Aminoacyl-tRNA biosynthesis	48	0.44622	2	0.070949	1.1491	1	1	0
Valine, leucine and isoleucine biosynthesis	8	0.074369	1	0.072156	1.1417	1	1	0
Phenylalanine metabolism	12	0.11155	1	0.10639	0.97309	1	1	0.35714
Retinol metabolism	16	0.14874	1	0.13945	0.85557	1	1	0.24551
Fructose and mannose metabolism	18	0.16733	1	0.15555	0.80812	1	1	0.03313
Pantothenate and CoA biosynthesis	19	0.17663	1	0.1635	0.78649	1	1	0
Citrate cycle (TCA cycle)	20	0.18592	1	0.17137	0.76605	1	1	0.09038
beta-Alanine metabolism	21	0.19522	1	0.17918	0.74671	1	1	0
Alanine, aspartate and glutamate metabolism	28	0.26029	1	0.23195	0.63461	1	1	0
Glyoxylate and dicarboxylate metabolism	32	0.29748	1	0.26066	0.58392	1	1	0.03175
Glycine, serine and threonine metabolism	34	0.31607	1	0.27465	0.56123	1	1	0
Biosynthesis of unsaturated fatty acids	36	0.33466	1	0.28838	0.54003	1	1	0
Amino sugar and nucleotide sugar metabolism	37	0.34396	1	0.29516	0.52994	1	1	0.01667
Valine, leucine and isoleucine degradation	40	0.37185	1	0.31513	0.5015	1	1	0
Steroid biosynthesis	42	0.39044	1	0.32816	0.48392	1	1	0
Tyrosine metabolism	42	0.39044	1	0.32816	0.48392	1	1	0.02463
Primary bile acid biosynthesis	46	0.42762	1	0.35351	0.45159	1	1	0.02285
Purine metabolism	66	0.61355	1	0.46751	0.33021	1	1	0.02167
